# Supplementary material for: The mechanism of an asymmetric ring-opening reaction of epoxide with amine catalyzed by a metal–organic framework: insights from combined quantum mechanics and molecular mechanics calculations
Source: Royal Society of Chemistry journal article supplement (doi:10.1039/c6dt04745a), 2017-01-01
Supplement: c6dt04745a1.pdf [file c6dt04745a1.pdf]

Full XYZ coordinates of QM/MM-optimized species (“QM(B3LYP)/MM” stands for the QM/MM-optimized structures obtained with the B3LYP functional (without dispersion), and “open-shell singlet” means that the open-shell singlet state was used in the QM/MM calculation)

|                     |           |           |           |           |           |          |           |
|---------------------|-----------|-----------|-----------|-----------|-----------|----------|-----------|
| ( <i>R,R</i> )-1-RC | C         | 18.404876 | 3.417024  | 19.587993 |           |          |           |
| C                   | 12.487000 | 7.261000  | 26.395000 | C         | 17.639888 | 4.497025 | 20.008011 |
| C                   | 11.616000 | 6.503000  | 25.622000 | C         | 17.550017 | 4.800019 | 21.362013 |
| C                   | 12.086000 | 5.395000  | 24.927000 | C         | 16.783924 | 5.881020 | 21.784030 |
| C                   | 13.428000 | 5.043000  | 25.007000 | C         | 16.107910 | 6.659026 | 20.850045 |
| C                   | 13.027000 | 3.179000  | 23.539000 | C         | 16.197885 | 6.355032 | 19.497042 |
| C                   | 11.685000 | 3.529000  | 23.460000 | C         | 16.963876 | 5.274031 | 19.076025 |
| C                   | 11.215000 | 4.638000  | 24.154000 | O         | 15.523872 | 7.185038 | 18.539057 |
| O                   | 10.782000 | 2.793000  | 22.654000 | O         | 18.565823 | 5.527821 | 24.111054 |
| Cu                  | 18.543436 | 6.084805  | 26.013443 | O         | 18.017878 | 3.388039 | 24.573350 |
| Cu                  | 17.946107 | 3.697792  | 26.528166 | C         | 18.263378 | 4.335537 | 23.745083 |
| C                   | 22.207131 | 3.939446  | 26.373350 | C         | 14.301000 | 5.801000 | 25.782000 |
| C                   | 22.750745 | 3.181819  | 27.426208 | C         | 13.829000 | 6.909000 | 26.476000 |
| C                   | 24.102685 | 2.863274  | 27.451108 | C         | 27.928247 | 6.998486 | 26.482974 |
| C                   | 24.935196 | 3.290294  | 26.421893 | C         | 27.095466 | 6.156473 | 25.754705 |
| C                   | 24.428234 | 4.024842  | 25.332608 | C         | 27.608111 | 5.038435 | 25.064532 |
| C                   | 23.043407 | 4.335953  | 25.292337 | C         | 29.002341 | 4.772680 | 25.125469 |
| C                   | 22.526771 | 5.001037  | 24.159562 | C         | 13.900000 | 3.935000 | 24.313000 |
| C                   | 23.369981 | 5.389126  | 23.123287 | C         | 28.681730 | 2.891464 | 23.623522 |
| C                   | 24.736466 | 5.129540  | 23.183135 | C         | 27.315032 | 3.111346 | 23.592494 |
| C                   | 25.276748 | 4.437917  | 24.275765 | C         | 26.753329 | 4.188862 | 24.313815 |
| O                   | 25.567939 | 5.524534  | 22.140947 | O         | 26.550591 | 2.217255 | 22.845818 |
| O                   | 20.432955 | 5.514509  | 26.188006 | O         | 16.596342 | 6.403264 | 25.847219 |
| O                   | 19.906511 | 3.369280  | 26.650012 | O         | 16.053413 | 4.265038 | 26.319646 |
| C                   | 20.763546 | 4.295868  | 26.415403 | C         | 15.735398 | 5.462569 | 25.983475 |
| C                   | 18.226927 | 4.022014  | 22.293999 | C         | 17.902375 | 5.826218 | 30.223994 |
| C                   | 18.992915 | 2.941012  | 21.873981 | C         | 18.892535 | 6.587126 | 30.871568 |
| C                   | 19.081890 | 2.638017  | 20.519979 | C         | 16.745304 | 5.422980 | 30.947109 |

|    |           |          |           |    |           |          |           |
|----|-----------|----------|-----------|----|-----------|----------|-----------|
| C  | 15.671461 | 4.756402 | 30.318978 | O  | 33.615560 | 3.334182 | 24.570245 |
| C  | 14.559884 | 4.358957 | 31.055653 | C  | 33.845604 | 4.306591 | 23.763258 |
| O  | 18.430525 | 6.404695 | 27.972755 | C  | 29.839642 | 5.607422 | 25.916266 |
| O  | 17.894331 | 4.260719 | 28.429047 | C  | 29.287283 | 6.727681 | 26.562917 |
| C  | 18.093368 | 5.475700 | 28.791378 | C  | 43.550271 | 6.896540 | 26.586867 |
| Cu | 34.092656 | 5.990628 | 26.097501 | C  | 42.720612 | 6.039220 | 25.875182 |
| Cu | 33.543847 | 3.581651 | 26.546007 | C  | 43.239211 | 4.923049 | 25.186727 |
| C  | 37.800760 | 3.886650 | 26.434447 | C  | 44.638190 | 4.671101 | 25.236987 |
| C  | 38.323963 | 3.139277 | 27.505531 | C  | 29.525737 | 3.704713 | 24.368909 |
| C  | 39.673247 | 2.814053 | 27.558137 | C  | 44.316841 | 2.758408 | 23.777380 |
| C  | 40.524388 | 3.218994 | 26.536008 | C  | 42.949483 | 2.979485 | 23.737966 |
| C  | 40.040464 | 3.943405 | 25.430121 | C  | 42.385189 | 4.066573 | 24.442721 |
| C  | 38.659011 | 4.271305 | 25.366949 | O  | 42.186898 | 2.077597 | 22.998875 |
| C  | 38.167912 | 4.939359 | 24.225872 | O  | 32.126732 | 6.286133 | 25.981645 |
| C  | 39.030750 | 5.303324 | 23.196503 | O  | 31.641701 | 4.119836 | 26.379716 |
| C  | 40.392246 | 5.018428 | 23.273573 | C  | 31.288136 | 5.321677 | 26.101865 |
| C  | 40.909472 | 4.330425 | 24.379978 | C  | 33.562581 | 5.590818 | 30.325269 |
| O  | 41.241891 | 5.388756 | 22.236984 | C  | 34.586691 | 6.319230 | 30.958084 |
| O  | 36.000575 | 5.441752 | 26.228960 | C  | 32.420486 | 5.197687 | 31.080376 |
| O  | 35.506918 | 3.281208 | 26.651787 | C  | 31.326105 | 4.541203 | 30.480297 |
| C  | 36.350800 | 4.224954 | 26.443216 | C  | 30.218692 | 4.178906 | 31.242170 |
| C  | 33.846855 | 4.021974 | 22.293721 | O  | 34.009067 | 6.242306 | 28.073044 |
| C  | 34.612832 | 2.940971 | 21.873686 | O  | 33.496921 | 4.082036 | 28.472087 |
| C  | 34.701783 | 2.637980 | 20.519681 | C  | 33.700559 | 5.285250 | 28.871443 |
| C  | 34.024755 | 3.416991 | 19.587710 | Cu | 49.695781 | 6.207181 | 25.981277 |
| C  | 33.259777 | 4.496993 | 20.007743 | Cu | 49.343761 | 3.790233 | 26.564306 |
| C  | 33.170827 | 4.799985 | 21.361749 | C  | 53.571004 | 4.464799 | 26.367945 |
| C  | 32.403849 | 5.880988 | 21.783783 | C  | 54.157059 | 3.947781 | 27.515908 |
| C  | 31.727822 | 6.658998 | 20.849812 | C  | 55.530060 | 3.732767 | 27.559832 |
| C  | 31.817772 | 6.355006 | 19.496807 | C  | 56.316003 | 4.036770 | 26.454793 |
| C  | 32.583750 | 5.274004 | 19.075773 | C  | 55.729947 | 4.554788 | 25.305829 |
| O  | 31.143744 | 7.185017 | 18.538837 | C  | 54.356948 | 4.768802 | 25.262905 |
| O  | 34.105898 | 5.497417 | 24.167795 | C  | 53.770890 | 5.287820 | 24.113942 |

|   |           |          |           |    |           |          |           |
|---|-----------|----------|-----------|----|-----------|----------|-----------|
| C | 54.557834 | 5.591822 | 23.007903 | O  | 49.296665 | 4.395920 | 28.455237 |
| C | 55.929834 | 5.377808 | 23.052827 | C  | 49.388614 | 5.633100 | 28.784771 |
| C | 56.515890 | 4.858790 | 24.200790 | C  | 11.158284 | 7.260965 | 41.959133 |
| O | 56.643771 | 5.617813 | 21.841791 | C  | 10.287267 | 6.502972 | 41.186144 |
| O | 51.637646 | 5.837991 | 26.120883 | C  | 10.757252 | 5.394972 | 40.491132 |
| O | 51.334207 | 3.662036 | 26.636203 | C  | 12.099252 | 5.042967 | 40.571107 |
| C | 52.092790 | 4.667279 | 26.380273 | C  | 11.698220 | 3.178974 | 39.103108 |
| C | 49.466780 | 4.021882 | 22.293161 | C  | 10.356220 | 3.528979 | 39.024133 |
| C | 50.232747 | 2.940878 | 21.873109 | C  | 9.886236  | 4.637978 | 39.718145 |
| C | 50.321671 | 2.637891 | 20.519101 | O  | 9.453203  | 2.792985 | 38.218146 |
| C | 49.644629 | 3.416907 | 19.587145 | Cu | 17.233239 | 6.153749 | 41.467023 |
| C | 48.879663 | 4.496911 | 20.007197 | Cu | 16.692489 | 3.752870 | 41.967575 |
| C | 48.790739 | 4.799899 | 21.361205 | C  | 20.956380 | 4.082772 | 41.826761 |
| C | 48.023773 | 5.880903 | 21.783256 | C  | 21.479081 | 3.326417 | 42.891548 |
| C | 47.347732 | 6.658919 | 20.849300 | C  | 22.832877 | 3.022660 | 42.956276 |
| C | 47.437657 | 6.354932 | 19.496292 | C  | 23.691270 | 3.460103 | 41.953797 |
| C | 48.203622 | 5.273928 | 19.075240 | C  | 23.211811 | 4.197274 | 40.855346 |
| O | 46.763615 | 7.184949 | 18.538336 | C  | 21.824410 | 4.500278 | 40.777497 |
| O | 49.731242 | 5.591586 | 24.088742 | C  | 21.338613 | 5.175888 | 39.638765 |
| O | 49.385064 | 3.426484 | 24.608743 | C  | 22.211452 | 5.571651 | 38.629335 |
| C | 49.525274 | 4.368945 | 23.749559 | C  | 23.576051 | 5.311696 | 38.723438 |
| C | 45.478031 | 5.539904 | 25.986921 | C  | 24.086739 | 4.620341 | 39.827096 |
| C | 44.915028 | 6.653240 | 26.637668 | O  | 24.431585 | 5.707130 | 37.703090 |
| C | 45.161977 | 3.587703 | 24.505092 | O  | 19.142999 | 5.618941 | 41.598692 |
| O | 47.715720 | 6.340173 | 25.884775 | O  | 18.662269 | 3.464140 | 42.061692 |
| O | 47.393477 | 4.172750 | 26.419204 | C  | 19.501338 | 4.408619 | 41.831986 |
| C | 46.948604 | 5.334250 | 26.097989 | C  | 16.881409 | 4.138507 | 37.721879 |
| C | 49.205884 | 5.999653 | 30.215095 | C  | 17.590367 | 3.037663 | 37.209212 |
| C | 50.152497 | 6.843404 | 30.823881 | C  | 17.596874 | 2.766955 | 35.847835 |
| C | 48.095336 | 5.533565 | 30.972590 | C  | 16.894726 | 3.590057 | 34.974459 |
| C | 47.063362 | 4.772110 | 30.384013 | C  | 16.146408 | 4.688895 | 35.446402 |
| C | 45.993283 | 4.322214 | 31.151186 | C  | 16.118586 | 4.952860 | 36.841345 |
| O | 49.608513 | 6.569455 | 27.935238 | C  | 15.305812 | 5.999342 | 37.321551 |

|   |           |          |           |    |           |          |           |
|---|-----------|----------|-----------|----|-----------|----------|-----------|
| C | 14.583692 | 6.790236 | 36.437014 | O  | 16.662321 | 4.295640 | 43.878550 |
| C | 14.638902 | 6.573835 | 35.070237 | C  | 16.857284 | 5.508540 | 44.251182 |
| C | 15.427414 | 5.522661 | 34.549843 | Cu | 32.876873 | 6.271331 | 41.544288 |
| O | 13.914380 | 7.449877 | 34.264871 | Cu | 32.328455 | 3.796075 | 42.176453 |
| O | 17.230064 | 5.617095 | 39.555659 | C  | 36.508666 | 4.025501 | 41.807601 |
| O | 16.748081 | 3.458572 | 40.001404 | C  | 37.005196 | 3.153221 | 42.759563 |
| C | 16.959574 | 4.420216 | 39.178876 | C  | 38.382017 | 2.842239 | 42.786056 |
| C | 12.972269 | 5.800962 | 41.346096 | C  | 39.239278 | 3.382733 | 41.851894 |
| C | 12.500284 | 6.908961 | 42.040108 | C  | 38.771940 | 4.260050 | 40.819607 |
| C | 26.684752 | 7.068801 | 42.312817 | C  | 37.366521 | 4.583411 | 40.801832 |
| C | 25.867293 | 6.289980 | 41.519705 | C  | 36.877211 | 5.416093 | 39.754532 |
| C | 26.375937 | 5.197368 | 40.743341 | C  | 37.724548 | 5.914975 | 38.794249 |
| C | 27.789637 | 4.934149 | 40.826066 | C  | 39.116354 | 5.632108 | 38.825017 |
| C | 12.571236 | 3.934968 | 39.877095 | C  | 39.644011 | 4.810665 | 39.819531 |
| C | 27.535341 | 3.120234 | 39.228602 | O  | 39.935688 | 6.163060 | 37.875159 |
| C | 26.135957 | 3.357737 | 39.151571 | O  | 34.730855 | 5.581134 | 41.711293 |
| C | 25.547345 | 4.375114 | 39.899060 | O  | 34.251934 | 3.419380 | 42.122542 |
| O | 25.493171 | 2.494882 | 38.310525 | C  | 35.053244 | 4.370770 | 41.879371 |
| O | 15.269282 | 6.440147 | 41.352713 | C  | 32.362735 | 3.944990 | 37.961756 |
| O | 14.778878 | 4.286845 | 41.805654 | C  | 32.993969 | 2.789627 | 37.536498 |
| C | 14.425678 | 5.484502 | 41.503139 | C  | 33.057018 | 2.493295 | 36.158069 |
| C | 16.713324 | 5.841907 | 45.695717 | C  | 32.478352 | 3.337537 | 35.233049 |
| C | 17.716063 | 6.613456 | 46.311376 | C  | 31.774862 | 4.523574 | 35.623301 |
| C | 18.781304 | 6.903267 | 32.219181 | C  | 31.710858 | 4.818417 | 37.031500 |
| C | 17.677331 | 6.468474 | 32.944032 | C  | 30.956860 | 5.950671 | 37.456138 |
| C | 16.648206 | 5.728081 | 32.330248 | C  | 30.332765 | 6.762888 | 36.545085 |
| C | 15.588299 | 5.421769 | 46.459920 | C  | 30.427489 | 6.507584 | 35.150094 |
| C | 14.507438 | 4.731311 | 45.871751 | C  | 31.136189 | 5.405067 | 34.680245 |
| C | 13.423996 | 4.326512 | 46.645422 | O  | 29.773539 | 7.434783 | 34.389133 |
| C | 14.486992 | 4.608061 | 32.423671 | O  | 32.786413 | 5.463153 | 39.711776 |
| C | 15.518704 | 5.300928 | 33.071185 | O  | 32.181902 | 3.364168 | 40.249706 |
| O | 13.372282 | 4.201754 | 33.148588 | C  | 32.439299 | 4.282950 | 39.417025 |
| O | 17.159031 | 6.450622 | 43.433320 | C  | 28.606679 | 5.762473 | 41.659837 |

|    |           |          |           |   |           |          |           |
|----|-----------|----------|-----------|---|-----------|----------|-----------|
| C  | 28.071702 | 6.815201 | 42.380840 | C | 54.401202 | 4.554601 | 40.869191 |
| C  | 42.295393 | 7.232720 | 42.158116 | C | 53.028202 | 4.768621 | 40.826292 |
| C  | 41.455484 | 6.431117 | 41.394305 | C | 52.442128 | 5.287645 | 39.677341 |
| C  | 41.962071 | 5.356802 | 40.636650 | C | 53.229054 | 5.591649 | 38.571289 |
| C  | 43.357137 | 5.082254 | 40.675525 | C | 54.601054 | 5.377629 | 38.616189 |
| C  | 28.337598 | 3.876788 | 40.042658 | C | 55.187129 | 4.858606 | 39.764139 |
| C  | 43.010326 | 3.266795 | 39.102380 | O | 55.314970 | 5.617636 | 37.405141 |
| C  | 41.646354 | 3.507424 | 39.077729 | O | 50.372332 | 5.931473 | 41.729107 |
| C  | 41.103372 | 4.559765 | 39.841045 | O | 49.973767 | 3.756088 | 42.179324 |
| O  | 40.867908 | 2.659805 | 38.294298 | C | 50.775210 | 4.733646 | 41.957397 |
| O  | 30.858559 | 6.455118 | 41.474383 | C | 48.267132 | 4.395455 | 37.817942 |
| O  | 30.433954 | 4.354628 | 42.157350 | C | 49.053285 | 3.334876 | 37.333186 |
| C  | 30.074275 | 5.502827 | 41.771640 | C | 49.116572 | 3.057477 | 35.974818 |
| C  | 32.271732 | 6.061439 | 45.738783 | C | 48.390820 | 3.829969 | 35.075363 |
| C  | 33.137188 | 6.975467 | 46.312448 | C | 47.567754 | 4.887132 | 35.516419 |
| C  | 34.519867 | 6.619751 | 32.312799 | C | 47.492376 | 5.165572 | 36.907894 |
| C  | 33.420897 | 6.212867 | 33.061084 | C | 46.620634 | 6.178530 | 37.354403 |
| C  | 32.357585 | 5.508311 | 32.467443 | C | 45.881246 | 6.920925 | 36.442225 |
| C  | 31.175969 | 5.513652 | 46.485239 | C | 45.970169 | 6.682368 | 35.080696 |
| C  | 30.198457 | 4.661515 | 45.894997 | C | 46.817889 | 5.662289 | 34.592670 |
| C  | 29.152089 | 4.168739 | 46.637028 | O | 45.215079 | 7.504644 | 34.246996 |
| C  | 30.167439 | 4.458341 | 32.605396 | O | 48.478276 | 5.883205 | 39.668834 |
| C  | 31.226087 | 5.128478 | 33.226619 | O | 48.096686 | 3.700340 | 40.090765 |
| O  | 29.049973 | 4.100164 | 33.348289 | C | 48.279980 | 4.676554 | 39.278338 |
| O  | 32.791453 | 6.588009 | 43.499787 | C | 44.206483 | 5.886142 | 41.485515 |
| O  | 32.437219 | 4.430489 | 44.035064 | C | 43.657145 | 6.967346 | 42.198762 |
| C  | 32.516706 | 5.661798 | 44.317996 | C | 43.867382 | 4.038344 | 39.879359 |
| Cu | 48.447196 | 6.400713 | 41.587749 | O | 46.473326 | 6.618921 | 41.476721 |
| Cu | 47.997314 | 3.974343 | 42.058479 | O | 46.067134 | 4.436507 | 41.875870 |
| C  | 52.242277 | 4.464616 | 41.931345 | C | 45.668363 | 5.629201 | 41.614207 |
| C  | 52.828352 | 3.947593 | 43.079296 | C | 47.873829 | 6.039511 | 45.796982 |
| C  | 54.201352 | 3.732573 | 43.123194 | C | 48.830463 | 6.846344 | 46.440167 |
| C  | 54.987277 | 4.036578 | 42.018142 | C | 50.045140 | 7.184662 | 32.166100 |

|    |           |          |           |   |           |          |           |
|----|-----------|----------|-----------|---|-----------|----------|-----------|
| C  | 48.986589 | 6.695194 | 32.923586 | O | 17.304510 | 3.423555 | 57.670957 |
| C  | 47.999893 | 5.871199 | 32.348890 | C | 18.146096 | 4.373755 | 57.482121 |
| C  | 46.741103 | 5.582049 | 46.526458 | C | 15.685825 | 4.212374 | 53.322283 |
| C  | 45.700259 | 4.858721 | 45.906057 | C | 16.411505 | 3.110369 | 52.835072 |
| C  | 44.612287 | 4.410928 | 46.648765 | C | 16.472500 | 2.841207 | 51.474934 |
| C  | 45.921713 | 4.611142 | 32.511612 | C | 15.802606 | 3.662325 | 50.575406 |
| C  | 46.912593 | 5.392921 | 33.121153 | C | 15.040839 | 4.763639 | 51.017606 |
| O  | 44.848358 | 4.152097 | 33.266807 | C | 14.970624 | 5.037012 | 52.410890 |
| O  | 48.350750 | 6.676061 | 43.552918 | C | 14.159285 | 6.098985 | 52.857104 |
| O  | 47.919535 | 4.501543 | 43.973004 | C | 13.475299 | 6.891630 | 51.943926 |
| C  | 48.065561 | 5.718077 | 44.356971 | C | 13.559537 | 6.655582 | 50.581664 |
| C  | 9.830844  | 7.260885 | 57.522289 | C | 14.344673 | 5.586714 | 50.093228 |
| C  | 8.959813  | 6.502896 | 56.749314 | O | 12.860058 | 7.525851 | 49.748094 |
| C  | 9.429780  | 5.394897 | 56.054290 | O | 15.947551 | 5.655519 | 55.205237 |
| C  | 10.771780 | 5.042887 | 56.134240 | O | 15.439541 | 3.489646 | 55.578734 |
| C  | 10.370715 | 3.178901 | 54.666241 | C | 15.689325 | 4.468918 | 54.788026 |
| C  | 9.028715  | 3.528910 | 54.587291 | C | 11.644813 | 5.800876 | 56.909215 |
| C  | 8.558747  | 4.637908 | 55.281315 | C | 11.172845 | 6.908875 | 57.603239 |
| O  | 8.125681  | 2.792922 | 53.781316 | C | 25.302315 | 7.076492 | 57.572741 |
| Cu | 15.893546 | 6.138020 | 57.133923 | C | 24.469313 | 6.248580 | 56.829465 |
| Cu | 15.341354 | 3.724228 | 57.551286 | C | 24.982422 | 5.148000 | 56.112113 |
| C  | 19.594781 | 4.040745 | 57.437265 | C | 26.378070 | 4.884830 | 56.161273 |
| C  | 20.147981 | 3.277401 | 58.480965 | C | 11.243748 | 3.934890 | 55.440215 |
| C  | 21.500976 | 2.962924 | 58.494400 | C | 26.054773 | 3.033124 | 54.624233 |
| C  | 22.324370 | 3.397233 | 57.461116 | C | 24.687529 | 3.252522 | 54.600473 |
| C  | 21.808171 | 4.139930 | 56.381711 | C | 24.126037 | 4.313433 | 55.346343 |
| C  | 20.423047 | 4.452287 | 56.356174 | O | 23.921921 | 2.371556 | 53.839452 |
| C  | 19.897813 | 5.133193 | 55.237212 | O | 13.938891 | 6.431855 | 56.972272 |
| C  | 20.732144 | 5.528433 | 54.196314 | O | 13.435047 | 4.270298 | 57.369153 |
| C  | 22.098421 | 5.262935 | 54.239540 | C | 13.091675 | 5.475089 | 57.084547 |
| C  | 22.647975 | 4.560495 | 55.320788 | C | 15.283042 | 5.695809 | 61.352094 |
| O  | 22.920753 | 5.665212 | 53.193111 | C | 16.314083 | 6.385792 | 61.978046 |
| O  | 17.795277 | 5.594841 | 57.299992 | C | 17.647087 | 6.928780 | 47.662112 |

|    |           |          |           |   |           |          |           |
|----|-----------|----------|-----------|---|-----------|----------|-----------|
| C  | 16.569966 | 6.488273 | 48.422721 | C | 29.632458 | 6.033620 | 52.861408 |
| C  | 15.528953 | 5.737359 | 47.844280 | C | 28.905473 | 6.791583 | 51.949863 |
| C  | 14.198077 | 5.242813 | 62.095147 | C | 29.000031 | 6.565254 | 50.586314 |
| C  | 13.166036 | 4.552830 | 61.469195 | C | 29.836771 | 5.541736 | 50.099612 |
| C  | 12.083071 | 4.099834 | 62.213248 | O | 28.259375 | 7.398830 | 49.752931 |
| C  | 13.382962 | 4.597621 | 48.010829 | O | 31.483903 | 5.671003 | 55.198654 |
| C  | 14.421833 | 5.313967 | 48.620706 | O | 31.044426 | 3.490736 | 55.575504 |
| O  | 12.291327 | 4.190867 | 48.770068 | C | 31.256689 | 4.477727 | 54.783028 |
| O  | 15.758650 | 6.378514 | 59.108000 | C | 27.216886 | 5.707562 | 56.962999 |
| O  | 15.278126 | 4.206425 | 59.477097 | C | 26.662718 | 6.810268 | 57.637869 |
| C  | 15.446276 | 5.410044 | 59.891887 | C | 40.912875 | 6.952107 | 57.633069 |
| Cu | 31.463163 | 6.145044 | 57.131260 | C | 40.085536 | 6.136866 | 56.872109 |
| Cu | 30.955701 | 3.721442 | 57.550789 | C | 40.602244 | 5.045964 | 56.142568 |
| C  | 35.200797 | 4.083059 | 57.439952 | C | 41.999422 | 4.783105 | 56.192452 |
| C  | 35.740951 | 3.344957 | 58.509040 | C | 26.900422 | 3.832391 | 55.383165 |
| C  | 37.087597 | 3.006708 | 58.535223 | C | 41.678514 | 2.944749 | 54.640452 |
| C  | 37.919043 | 3.390986 | 57.489437 | C | 40.311381 | 3.168268 | 54.609604 |
| C  | 37.418670 | 4.112408 | 56.388515 | C | 39.747177 | 4.224242 | 55.360891 |
| C  | 36.039166 | 4.451819 | 56.351773 | O | 39.548310 | 2.293495 | 53.839116 |
| C  | 35.529206 | 5.113803 | 55.215608 | O | 29.494735 | 6.411473 | 57.016995 |
| C  | 36.372877 | 5.461260 | 54.164900 | O | 29.043249 | 4.232345 | 57.383570 |
| C  | 37.733970 | 5.168749 | 54.217216 | C | 28.670487 | 5.433873 | 57.128604 |
| C  | 38.269586 | 4.486391 | 55.318639 | C | 30.903116 | 5.695628 | 61.351271 |
| O  | 38.565112 | 5.526440 | 53.161779 | C | 31.934171 | 6.385605 | 61.977208 |
| O  | 33.381433 | 5.621887 | 57.260155 | C | 32.987090 | 7.334607 | 47.669904 |
| O  | 32.919442 | 3.449770 | 57.661395 | C | 31.973326 | 6.790464 | 48.429685 |
| C  | 33.748654 | 4.407286 | 57.461577 | C | 31.026052 | 5.870005 | 47.874009 |
| C  | 31.252005 | 4.222725 | 53.316546 | C | 29.818163 | 5.242633 | 62.094342 |
| C  | 32.031539 | 3.161969 | 52.821616 | C | 28.786109 | 4.552656 | 61.468406 |
| C  | 32.109408 | 2.908831 | 51.459077 | C | 27.703155 | 4.099663 | 62.212477 |
| C  | 31.400489 | 3.702438 | 50.564671 | C | 29.028995 | 4.466783 | 48.020746 |
| C  | 30.578036 | 4.754456 | 51.014663 | C | 29.949699 | 5.308583 | 48.641929 |
| C  | 30.494549 | 5.015083 | 52.409805 | O | 28.005178 | 3.929726 | 48.740412 |

|    |           |          |           |   |           |          |           |
|----|-----------|----------|-----------|---|-----------|----------|-----------|
| O  | 31.365104 | 6.379846 | 59.106653 | C | 42.836611 | 5.605463 | 56.996305 |
| O  | 30.899419 | 4.204633 | 59.477416 | C | 42.273479 | 6.691174 | 57.692987 |
| C  | 31.063446 | 5.409408 | 59.891489 | C | 42.523299 | 3.736928 | 55.408569 |
| Cu | 47.050931 | 6.251388 | 57.151014 | O | 45.076797 | 6.400703 | 57.023778 |
| Cu | 46.686615 | 3.795058 | 57.532586 | O | 44.741042 | 4.194577 | 57.350054 |
| C  | 50.914826 | 4.464382 | 57.493755 | C | 44.304163 | 5.381782 | 57.123597 |
| C  | 51.500920 | 3.947352 | 58.641694 | C | 46.523192 | 5.695393 | 61.350166 |
| C  | 52.873920 | 3.732327 | 58.685568 | C | 47.554258 | 6.385364 | 61.976087 |
| C  | 53.659827 | 4.036331 | 57.580503 | C | 48.707517 | 7.164406 | 47.786106 |
| C  | 53.073733 | 4.554362 | 56.431564 | C | 47.625095 | 6.685348 | 48.514770 |
| C  | 51.700733 | 4.768387 | 56.388690 | C | 46.632280 | 5.891490 | 47.908315 |
| C  | 51.114640 | 5.287417 | 55.239751 | C | 45.438249 | 5.242399 | 62.093255 |
| C  | 51.901547 | 5.591423 | 54.133687 | C | 44.406182 | 4.552428 | 61.467335 |
| C  | 53.273547 | 5.377397 | 54.178561 | C | 43.323240 | 4.099435 | 62.211424 |
| C  | 53.859639 | 4.858367 | 55.326499 | C | 44.530526 | 4.665274 | 48.015353 |
| O  | 53.987443 | 5.617405 | 52.967501 | C | 45.527300 | 5.414240 | 48.655850 |
| O  | 48.991607 | 5.859508 | 57.301162 | O | 43.440622 | 4.206414 | 48.746278 |
| O  | 48.672392 | 3.655313 | 57.668263 | O | 46.921223 | 6.443748 | 59.124213 |
| C  | 49.437846 | 4.672514 | 57.497813 | O | 46.573397 | 4.239341 | 59.461338 |
| C  | 46.962186 | 4.367428 | 53.316311 | C | 46.675301 | 5.443884 | 59.890907 |
| C  | 47.784108 | 3.348784 | 52.801771 | C | 16.262158 | 6.620778 | 63.347051 |
| C  | 47.836269 | 3.095630 | 51.438619 | C | 15.179191 | 6.168782 | 64.090104 |
| C  | 47.065825 | 3.852687 | 50.564016 | C | 14.147152 | 5.478800 | 63.465152 |
| C  | 46.213442 | 4.873779 | 51.034620 | C | 12.031146 | 4.336820 | 63.582253 |
| C  | 46.146744 | 5.124109 | 52.431560 | C | 13.063187 | 5.025805 | 64.207205 |
| C  | 45.242747 | 6.093975 | 52.908362 | O | 10.943183 | 3.908824 | 64.361306 |
| C  | 44.465669 | 6.826150 | 52.019770 | C | 31.882271 | 6.620587 | 63.346214 |
| C  | 44.548613 | 6.619871 | 50.652664 | C | 30.799317 | 6.168593 | 64.089284 |
| C  | 45.426925 | 5.640830 | 50.134519 | C | 29.767262 | 5.478616 | 63.464348 |
| O  | 43.761980 | 7.438198 | 49.844729 | C | 27.651255 | 4.336645 | 63.581483 |
| O  | 47.121732 | 5.803477 | 55.214922 | C | 28.683309 | 5.025622 | 64.206418 |
| O  | 46.812529 | 3.595539 | 55.560886 | O | 26.563304 | 3.908650 | 64.360554 |
| C  | 46.965262 | 4.604166 | 54.783520 | C | 47.502385 | 6.620342 | 63.345096 |



|   |           |          |           |   |           |          |           |
|---|-----------|----------|-----------|---|-----------|----------|-----------|
| C | 46.419443 | 6.168348 | 64.088184 | H | 37.116535 | 5.179340 | 24.106265 |
| C | 45.387375 | 5.478376 | 63.463264 | H | 38.630784 | 5.817281 | 22.332929 |
| C | 43.271365 | 4.336411 | 63.580432 | H | 35.146058 | 2.325290 | 22.590355 |
| C | 44.303433 | 5.025383 | 64.205353 | H | 35.297745 | 1.792953 | 20.190413 |
| O | 42.183428 | 3.908416 | 64.359522 | H | 34.099803 | 3.170470 | 18.536513 |
| H | 12.119254 | 8.127133 | 26.935666 | H | 32.267957 | 6.144862 | 22.826123 |
| H | 10.573032 | 6.786854 | 25.566333 | H | 31.125441 | 7.499989 | 21.165063 |
| H | 13.383763 | 2.323394 | 22.982316 | H | 29.921137 | 7.385836 | 27.146161 |
| H | 9.847446  | 3.169729 | 22.676912 | H | 43.132153 | 7.757364 | 27.099252 |
| H | 22.115784 | 2.849689 | 28.239717 | H | 41.664398 | 6.266861 | 25.854080 |
| H | 24.509703 | 2.285929 | 28.275398 | H | 30.587141 | 3.489108 | 24.325993 |
| H | 25.983279 | 3.028143 | 26.475247 | H | 44.726140 | 1.924889 | 23.222447 |
| H | 21.469865 | 5.218615 | 24.049312 | H | 35.450194 | 6.646231 | 30.389652 |
| H | 22.950491 | 5.901127 | 22.267826 | H | 31.302176 | 4.310944 | 29.419868 |
| H | 19.532040 | 2.329460 | 22.589907 | H | 29.391703 | 3.675890 | 30.758801 |
| H | 19.679264 | 1.794024 | 20.190520 | H | 31.291872 | 6.860973 | 17.596321 |
| H | 18.480489 | 3.170817 | 18.536724 | H | 40.762650 | 5.904749 | 21.514402 |
| H | 16.651512 | 6.145316 | 22.827135 | H | 41.205496 | 2.298119 | 23.000600 |
| H | 15.506946 | 7.501029 | 21.165187 | H | 53.552003 | 3.700202 | 28.381287 |
| H | 14.495591 | 7.508317 | 27.087429 | H | 55.987723 | 3.326161 | 28.455755 |
| H | 27.515324 | 7.862516 | 26.994084 | H | 57.384075 | 3.866347 | 26.497861 |
| H | 26.042652 | 6.398286 | 25.719286 | H | 52.703465 | 5.451763 | 24.014100 |
| H | 14.941519 | 3.634106 | 24.311133 | H | 54.081117 | 5.975897 | 22.116757 |
| H | 29.090976 | 2.069016 | 23.052181 | H | 50.777529 | 2.335081 | 22.589467 |
| H | 19.763787 | 6.924642 | 30.321714 | H | 50.920925 | 1.795288 | 20.189768 |
| H | 15.665798 | 4.545495 | 29.254934 | H | 49.720401 | 3.170977 | 18.535925 |
| H | 13.751339 | 3.846370 | 30.552277 | H | 47.862597 | 6.134555 | 22.823763 |
| H | 15.671692 | 6.861015 | 17.596372 | H | 46.741136 | 7.496768 | 21.164913 |
| H | 25.072102 | 6.039503 | 21.428862 | H | 45.548169 | 7.335162 | 27.193975 |
| H | 25.569095 | 2.436739 | 22.852331 | H | 46.223623 | 3.370662 | 24.471799 |
| H | 37.673663 | 2.816640 | 28.310760 | H | 50.986574 | 7.227494 | 30.247726 |
| H | 40.062844 | 2.245180 | 28.396730 | H | 47.058984 | 4.525022 | 29.327763 |
| H | 41.569245 | 2.948768 | 26.609055 | H | 45.215537 | 3.738459 | 30.677613 |

|   |           |          |           |   |           |          |           |
|---|-----------|----------|-----------|---|-----------|----------|-----------|
| H | 46.913313 | 6.862038 | 17.595733 | H | 35.815285 | 5.659183 | 39.708441 |
| H | 56.056209 | 5.977265 | 21.104179 | H | 37.325769 | 6.552014 | 37.995902 |
| H | 10.790982 | 8.128149 | 42.498338 | H | 33.460696 | 2.130963 | 38.273590 |
| H | 9.244447  | 6.787092 | 41.129966 | H | 33.575895 | 1.590588 | 35.820484 |
| H | 12.055455 | 2.324970 | 38.544175 | H | 32.556963 | 3.074166 | 34.173290 |
| H | 8.519403  | 3.171305 | 38.239510 | H | 30.868090 | 6.171417 | 38.520536 |
| H | 20.824964 | 2.982196 | 43.684838 | H | 29.741177 | 7.625206 | 36.864231 |
| H | 23.221176 | 2.446587 | 43.790651 | H | 28.714163 | 7.430514 | 43.016441 |
| H | 24.739966 | 3.204285 | 42.037243 | H | 41.886692 | 8.064809 | 42.723111 |
| H | 20.283976 | 5.393611 | 39.503147 | H | 40.400228 | 6.670177 | 41.387993 |
| H | 21.814254 | 6.087405 | 37.765189 | H | 29.406110 | 3.657830 | 40.089438 |
| H | 18.150975 | 2.393461 | 37.876894 | H | 43.408966 | 2.461914 | 38.498720 |
| H | 18.153499 | 1.917171 | 35.465284 | H | 33.941957 | 7.401888 | 45.708144 |
| H | 16.925109 | 3.347617 | 33.921665 | H | 35.325003 | 7.172680 | 32.786952 |
| H | 15.203057 | 6.214978 | 38.379019 | H | 33.401767 | 6.465792 | 34.113757 |
| H | 13.966217 | 7.594786 | 36.813520 | H | 30.269157 | 4.398514 | 44.839024 |
| H | 13.169370 | 7.511900 | 42.644912 | H | 28.403559 | 3.524524 | 46.160241 |
| H | 26.259133 | 7.893067 | 42.893632 | H | 28.381050 | 3.570388 | 32.808651 |
| H | 24.799339 | 6.528752 | 41.490396 | H | 29.794711 | 7.226221 | 33.442160 |
| H | 13.611949 | 3.633921 | 39.868251 | H | 39.418355 | 6.716261 | 37.267825 |
| H | 27.947986 | 2.313954 | 38.616593 | H | 39.884352 | 2.881789 | 38.323171 |
| H | 18.564705 | 6.961423 | 45.733293 | H | 52.223863 | 3.709906 | 43.947690 |
| H | 19.557715 | 7.484228 | 32.707139 | H | 54.659332 | 3.328160 | 44.019912 |
| H | 17.625082 | 6.729722 | 33.992320 | H | 56.055406 | 3.866631 | 42.061230 |
| H | 14.474489 | 4.505815 | 44.811293 | H | 51.374612 | 5.452702 | 39.579093 |
| H | 12.609926 | 3.794478 | 46.172030 | H | 52.752219 | 5.975683 | 37.680078 |
| H | 12.716350 | 3.682479 | 32.584410 | H | 49.630504 | 2.727632 | 38.021210 |
| H | 13.971696 | 7.223648 | 33.286681 | H | 49.733671 | 2.239967 | 35.615475 |
| H | 23.960312 | 6.246154 | 36.991284 | H | 48.465000 | 3.581708 | 34.026170 |
| H | 24.547195 | 2.689038 | 38.223119 | H | 46.485617 | 6.405093 | 38.405990 |
| H | 36.322056 | 2.724232 | 43.496936 | H | 45.217844 | 7.700138 | 36.793040 |
| H | 38.770177 | 2.168232 | 43.556109 | H | 44.296926 | 7.601416 | 42.802241 |
| H | 40.301160 | 3.122285 | 41.902454 | H | 44.926718 | 3.809019 | 39.834465 |

|   |           |          |           |   |           |          |           |
|---|-----------|----------|-----------|---|-----------|----------|-----------|
| H | 49.681887 | 7.224661 | 45.885903 | H | 12.954309 | 7.298460 | 48.772895 |
| H | 50.788394 | 7.829816 | 32.624093 | H | 22.420666 | 6.189215 | 52.490592 |
| H | 48.934929 | 6.978728 | 33.966221 | H | 22.941238 | 2.594305 | 53.847135 |
| H | 45.701837 | 4.639955 | 44.843860 | H | 35.104101 | 3.033456 | 59.329159 |
| H | 43.828921 | 3.855155 | 46.151367 | H | 37.489794 | 2.440412 | 59.369407 |
| H | 44.218565 | 3.575601 | 32.729032 | H | 38.961460 | 3.106885 | 57.539827 |
| H | 45.308053 | 7.270142 | 33.273427 | H | 34.477694 | 5.362436 | 55.117145 |
| H | 54.726518 | 5.972725 | 36.665982 | H | 35.958920 | 5.969372 | 53.304419 |
| H | 9.463382  | 8.127040 | 58.062938 | H | 32.593938 | 2.535875 | 53.505087 |
| H | 7.916937  | 6.786690 | 56.693565 | H | 32.724486 | 2.093006 | 51.092156 |
| H | 10.728186 | 2.325406 | 54.106682 | H | 31.487403 | 3.473237 | 49.510870 |
| H | 7.191576  | 3.170330 | 53.803812 | H | 29.497013 | 6.252034 | 53.915496 |
| H | 19.518893 | 2.934610 | 59.294488 | H | 28.247892 | 7.574692 | 52.304244 |
| H | 21.915542 | 2.380464 | 59.311234 | H | 27.296794 | 7.458201 | 58.232294 |
| H | 23.372988 | 3.135211 | 57.503723 | H | 40.496024 | 7.793120 | 58.178227 |
| H | 18.841088 | 5.359010 | 55.142669 | H | 39.032716 | 6.378355 | 56.845560 |
| H | 20.306176 | 6.050714 | 53.350309 | H | 27.961915 | 3.618324 | 55.334443 |
| H | 16.941353 | 2.461529 | 53.523153 | H | 42.088204 | 2.138947 | 54.046219 |
| H | 17.042838 | 1.990857 | 51.114370 | H | 32.787939 | 6.739530 | 61.409433 |
| H | 15.871852 | 3.418357 | 49.524834 | H | 33.685118 | 8.045585 | 48.122645 |
| H | 14.029356 | 6.326810 | 53.908989 | H | 31.889815 | 7.084782 | 49.480670 |
| H | 12.859674 | 7.709193 | 52.294409 | H | 28.748430 | 4.375670 | 60.399840 |
| H | 11.840563 | 7.509201 | 58.212320 | H | 26.897622 | 3.574758 | 61.718340 |
| H | 24.888817 | 7.926377 | 58.106509 | H | 27.470646 | 3.352504 | 48.171403 |
| H | 23.415628 | 6.487519 | 56.805255 | H | 28.374154 | 7.187975 | 48.772978 |
| H | 12.285083 | 3.636314 | 55.426780 | H | 38.075987 | 6.038984 | 52.443179 |
| H | 26.463352 | 2.223083 | 54.034971 | H | 38.568112 | 2.518200 | 53.843197 |
| H | 17.168294 | 6.739369 | 61.410620 | H | 50.894885 | 3.700084 | 59.506304 |
| H | 18.434582 | 7.516401 | 48.123853 | H | 53.331559 | 3.325528 | 59.581311 |
| H | 16.549267 | 6.750995 | 49.471789 | H | 54.727845 | 3.865735 | 57.623143 |
| H | 13.128808 | 4.376143 | 60.400560 | H | 50.047611 | 5.459292 | 55.145269 |
| H | 11.277806 | 3.574488 | 61.719256 | H | 51.424883 | 5.976993 | 53.243013 |
| H | 11.625158 | 3.659443 | 48.229875 | H | 48.392047 | 2.750795 | 53.471164 |

|   |           |          |           |   |           |           |           |
|---|-----------|----------|-----------|---|-----------|-----------|-----------|
| H | 48.476825 | 2.307064 | 51.056422 | H | 44.238613 | 5.198840  | 65.267029 |
| H | 47.129270 | 3.620247 | 49.510665 | H | 48.274005 | 5.043193  | 18.026057 |
| H | 45.111748 | 6.294594 | 53.965694 | C | 32.766118 | 8.585356  | 39.331873 |
| H | 43.777950 | 7.572883 | 52.393704 | C | 33.208145 | 9.556260  | 40.357228 |
| H | 42.903973 | 7.338451 | 58.292031 | C | 34.531862 | 10.289463 | 40.224317 |
| H | 43.584712 | 3.522001 | 55.363261 | C | 35.171629 | 10.136374 | 38.831086 |
| H | 48.405659 | 6.744615 | 61.407908 | C | 35.064136 | 8.700645  | 38.298076 |
| H | 49.455983 | 7.784949 | 48.268900 | C | 33.595922 | 8.292855  | 38.104888 |
| H | 47.560418 | 6.953156 | 49.560686 | O | 33.329008 | 8.132781  | 40.573372 |
| H | 44.381318 | 4.364407 | 60.399389 | C | 30.038258 | 9.879727  | 42.631563 |
| H | 42.519309 | 3.571669 | 61.717702 | C | 29.336099 | 11.054848 | 42.970965 |
| H | 42.806376 | 3.655744 | 48.186960 | C | 29.423642 | 11.588770 | 44.259656 |
| H | 43.848703 | 7.225840 | 48.865735 | C | 30.203429 | 10.967052 | 45.242155 |
| H | 53.398691 | 5.970970 | 52.227763 | C | 30.902261 | 9.799464  | 44.909815 |
| H | 17.068265 | 7.157987 | 63.836008 | C | 30.829036 | 9.260555  | 43.623837 |
| H | 15.148107 | 6.357233 | 65.155559 | N | 29.997214 | 9.353294  | 41.340010 |
| H | 10.263169 | 3.421745 | 63.797076 | H | 34.376874 | 11.357585 | 40.459466 |
| H | 32.688224 | 7.158026 | 63.835097 | H | 32.428277 | 10.009033 | 40.982102 |
| H | 30.768021 | 6.357173 | 65.154687 | H | 31.688681 | 8.391958  | 39.252077 |
| H | 25.881770 | 3.424331 | 63.795669 | H | 36.227563 | 10.458280 | 38.872828 |
| H | 48.307513 | 7.159116 | 63.833759 | H | 34.662310 | 10.816583 | 38.119743 |
| H | 46.387752 | 6.357304 | 65.153493 | H | 35.601685 | 8.607366  | 37.336859 |
| H | 41.501161 | 3.425247 | 63.794418 | H | 35.547224 | 8.006168  | 39.008980 |
| H | 54.922549 | 4.682785 | 55.325786 | H | 33.150188 | 8.846194  | 37.255544 |
| H | 56.250090 | 4.683167 | 39.763715 | H | 33.503515 | 7.217682  | 37.874981 |
| H | 57.578895 | 4.683439 | 24.200639 | H | 35.209246 | 9.890417  | 41.002410 |
| H | 32.654274 | 5.043336 | 18.026522 | H | 28.719976 | 11.551847 | 42.212813 |
| H | 17.034867 | 5.043642 | 18.026671 | H | 28.869712 | 12.503833 | 44.498084 |
| H | 10.176549 | 4.915312 | 24.089625 | H | 30.264297 | 11.384960 | 46.251835 |
| H | 8.847993  | 4.915598 | 39.653310 | H | 31.514049 | 9.287711  | 45.660562 |
| H | 7.520561  | 4.915553 | 55.216445 | H | 31.391680 | 8.355677  | 43.382322 |
| H | 12.998950 | 5.198986 | 65.269020 | H | 30.218364 | 8.356639  | 41.272657 |
| H | 28.618763 | 5.198981 | 65.268146 | H | 29.180392 | 9.608607  | 40.791024 |

(*R,R*)-1-TS1

|    |           |          |           |    |           |          |           |
|----|-----------|----------|-----------|----|-----------|----------|-----------|
| C  | 12.487000 | 7.261000 | 26.395000 | C  | 16.107910 | 6.659026 | 20.850045 |
| C  | 11.616000 | 6.503000 | 25.622000 | C  | 16.197885 | 6.355031 | 19.497042 |
| C  | 12.086000 | 5.395000 | 24.927000 | C  | 16.963875 | 5.274030 | 19.076025 |
| C  | 13.428000 | 5.043000 | 25.007000 | O  | 15.523872 | 7.185037 | 18.539057 |
| C  | 13.027000 | 3.179000 | 23.539000 | O  | 18.566867 | 5.529630 | 24.111016 |
| C  | 11.685000 | 3.529000 | 23.460000 | O  | 18.023068 | 3.388865 | 24.570326 |
| C  | 11.215000 | 4.638000 | 24.154000 | C  | 18.264899 | 4.337454 | 23.743465 |
| O  | 10.782000 | 2.793000 | 22.654000 | C  | 14.301000 | 5.801000 | 25.782000 |
| Cu | 18.541005 | 6.085547 | 26.019072 | C  | 13.829000 | 6.909000 | 26.476000 |
| Cu | 17.952304 | 3.697441 | 26.526471 | C  | 28.021199 | 7.174712 | 26.466282 |
| C  | 22.218138 | 3.963576 | 26.392874 | C  | 27.171709 | 6.306698 | 25.787129 |
| C  | 22.749609 | 3.184297 | 27.436449 | C  | 27.671539 | 5.165157 | 25.127232 |
| C  | 24.106882 | 2.885553 | 27.482722 | C  | 29.068273 | 4.899079 | 25.175052 |
| C  | 24.958091 | 3.351830 | 26.485100 | C  | 13.900000 | 3.935000 | 24.313000 |
| C  | 24.464012 | 4.106708 | 25.403980 | C  | 28.715845 | 2.960227 | 23.751745 |
| C  | 23.074193 | 4.401754 | 25.343125 | C  | 27.350933 | 3.185520 | 23.730352 |
| C  | 22.576100 | 5.089841 | 24.215871 | C  | 26.803103 | 4.292545 | 24.417520 |
| C  | 23.436848 | 5.518355 | 23.208793 | O  | 26.575441 | 2.270739 | 23.022203 |
| C  | 24.804000 | 5.269994 | 23.287917 | O  | 16.592685 | 6.402792 | 25.852021 |
| C  | 25.329214 | 4.553561 | 24.372984 | O  | 16.053524 | 4.263613 | 26.321043 |
| O  | 25.651769 | 5.701147 | 22.273383 | C  | 15.733683 | 5.460916 | 25.984876 |
| O  | 20.435127 | 5.524410 | 26.197811 | C  | 17.923420 | 5.802433 | 30.237103 |
| O  | 19.918955 | 3.374875 | 26.645635 | C  | 18.906488 | 6.584482 | 30.870694 |
| C  | 20.771989 | 4.307335 | 26.419216 | C  | 16.796475 | 5.357804 | 30.984231 |
| C  | 18.226927 | 4.022014 | 22.293999 | C  | 15.725262 | 4.668871 | 30.376182 |
| C  | 18.992915 | 2.941012 | 21.873981 | C  | 14.641583 | 4.232146 | 31.134056 |
| C  | 19.081890 | 2.638017 | 20.519979 | O  | 18.425286 | 6.399434 | 27.984244 |
| C  | 18.404876 | 3.417023 | 19.587993 | O  | 17.904642 | 4.251133 | 28.432477 |
| C  | 17.639888 | 4.497024 | 20.008011 | C  | 18.097412 | 5.464570 | 28.800139 |
| C  | 17.550913 | 4.800019 | 21.362013 | Cu | 34.183736 | 6.119025 | 26.005245 |
| C  | 16.783924 | 5.881020 | 21.784030 | Cu | 33.620026 | 3.737715 | 26.564834 |
|    |           |          |           | C  | 37.869834 | 3.986729 | 26.375881 |
|    |           |          |           | C  | 38.396831 | 3.282890 | 27.474228 |

|   |           |          |           |    |           |          |           |
|---|-----------|----------|-----------|----|-----------|----------|-----------|
| C | 39.742103 | 2.937671 | 27.520812 | C  | 44.380974 | 2.748001 | 23.713349 |
| C | 40.585187 | 3.280940 | 26.469041 | C  | 43.014643 | 2.962119 | 23.648518 |
| C | 40.095310 | 3.963911 | 25.338748 | C  | 42.433023 | 4.050963 | 24.337522 |
| C | 38.716552 | 4.306855 | 25.279671 | O  | 42.271368 | 2.048041 | 22.906111 |
| C | 38.218908 | 4.924438 | 24.113343 | O  | 32.214143 | 6.427886 | 25.911281 |
| C | 39.071937 | 5.230465 | 23.055697 | O  | 31.718911 | 4.286265 | 26.413948 |
| C | 40.431823 | 4.939539 | 23.130555 | C  | 31.370527 | 5.476623 | 26.088518 |
| C | 40.956309 | 4.299452 | 24.263263 | C  | 33.757985 | 5.920884 | 30.246000 |
| O | 41.273369 | 5.259549 | 22.070924 | C  | 34.799065 | 6.690703 | 30.797714 |
| O | 36.090258 | 5.554975 | 26.130365 | C  | 32.638904 | 5.580536 | 31.056704 |
| O | 35.579976 | 3.418910 | 26.647054 | C  | 31.530366 | 4.880404 | 30.537105 |
| C | 36.428909 | 4.343684 | 26.387627 | C  | 30.443217 | 4.572520 | 31.351618 |
| C | 33.846854 | 4.021972 | 22.293718 | O  | 34.140415 | 6.459722 | 27.964015 |
| C | 34.612831 | 2.940969 | 21.873683 | O  | 33.622380 | 4.324151 | 28.471587 |
| C | 34.701781 | 2.637978 | 20.519678 | C  | 33.845740 | 5.542401 | 28.810118 |
| C | 34.024753 | 3.416989 | 19.587708 | Cu | 49.700141 | 6.207575 | 25.980832 |
| C | 33.259776 | 4.496991 | 20.007741 | Cu | 49.346534 | 3.791293 | 26.560551 |
| C | 33.170826 | 4.799983 | 21.361747 | C  | 53.571003 | 4.464792 | 26.367939 |
| C | 32.403848 | 5.880986 | 21.783781 | C  | 54.157058 | 3.947774 | 27.515902 |
| C | 31.727821 | 6.658997 | 20.849810 | C  | 55.530059 | 3.732759 | 27.559826 |
| C | 31.817771 | 6.355005 | 19.496805 | C  | 56.316002 | 4.036762 | 26.454787 |
| C | 32.583748 | 5.274002 | 19.075771 | C  | 55.729946 | 4.554780 | 25.305823 |
| O | 31.143743 | 7.185016 | 18.538835 | C  | 54.356947 | 4.768795 | 25.262899 |
| O | 34.162978 | 5.545891 | 24.103370 | C  | 53.770890 | 5.287813 | 24.113936 |
| O | 33.652866 | 3.405857 | 24.595376 | C  | 54.557834 | 5.591815 | 23.007897 |
| C | 33.879930 | 4.345752 | 23.750071 | C  | 55.929834 | 5.377800 | 23.052821 |
| C | 29.922427 | 5.762612 | 25.916003 | C  | 56.515889 | 4.858782 | 24.200784 |
| C | 29.383588 | 6.908012 | 26.529164 | O  | 56.643771 | 5.617805 | 21.841785 |
| C | 43.549375 | 6.898537 | 26.487857 | O  | 51.642672 | 5.838949 | 26.127013 |
| C | 42.735479 | 6.038763 | 25.759858 | O  | 51.338324 | 3.661582 | 26.634248 |
| C | 43.270083 | 4.916598 | 25.092428 | C  | 52.096362 | 4.667229 | 26.380447 |
| C | 44.668874 | 4.667356 | 25.175299 | C  | 49.466779 | 4.021876 | 22.293156 |
| C | 29.574601 | 3.800110 | 24.451687 | C  | 50.232745 | 2.940872 | 21.873104 |

|   |           |          |           |    |           |          |           |
|---|-----------|----------|-----------|----|-----------|----------|-----------|
| C | 50.321669 | 2.637885 | 20.519096 | O  | 9.453204  | 2.792989 | 38.218147 |
| C | 49.644627 | 3.416901 | 19.587140 | Cu | 17.241501 | 6.036945 | 41.546083 |
| C | 48.879661 | 4.496905 | 20.007192 | Cu | 16.615839 | 3.659841 | 42.056808 |
| C | 48.790737 | 4.799893 | 21.361200 | C  | 20.882005 | 3.859849 | 42.086796 |
| C | 48.023772 | 5.880897 | 21.783251 | C  | 21.338337 | 3.174692 | 43.227660 |
| C | 47.347731 | 6.658913 | 20.849295 | C  | 22.684318 | 2.861612 | 43.380907 |
| C | 47.437655 | 6.354926 | 19.496287 | C  | 23.599134 | 3.217649 | 42.394810 |
| C | 48.203620 | 5.273922 | 19.075235 | C  | 23.181620 | 3.873379 | 41.221634 |
| O | 46.763613 | 7.184943 | 18.538331 | C  | 21.803501 | 4.184743 | 41.054190 |
| O | 49.738719 | 5.591850 | 24.085275 | C  | 21.382646 | 4.778226 | 39.846567 |
| O | 49.388331 | 3.427566 | 24.604383 | C  | 22.306485 | 5.078770 | 38.848020 |
| C | 49.528321 | 4.370170 | 23.746340 | C  | 23.661212 | 4.812011 | 39.027049 |
| C | 45.489980 | 5.537977 | 25.942993 | C  | 24.109894 | 4.211957 | 40.209666 |
| C | 44.912923 | 6.654505 | 26.575649 | O  | 24.570478 | 5.118704 | 38.022835 |
| C | 45.209176 | 3.583603 | 24.455339 | O  | 19.132926 | 5.439097 | 41.731471 |
| O | 47.720903 | 6.342657 | 25.876978 | O  | 18.570283 | 3.307804 | 42.211888 |
| O | 47.395650 | 4.176003 | 26.411962 | C  | 19.443563 | 4.223995 | 42.004420 |
| C | 46.954545 | 5.335584 | 26.081153 | C  | 16.906896 | 4.010773 | 37.810476 |
| C | 49.193466 | 5.991037 | 30.213388 | C  | 17.602708 | 2.896260 | 37.309653 |
| C | 50.127770 | 6.845494 | 30.826194 | C  | 17.631427 | 2.630696 | 35.945859 |
| C | 48.091309 | 5.503492 | 30.969836 | C  | 16.963172 | 3.469068 | 35.058456 |
| C | 47.066912 | 4.733823 | 30.378465 | C  | 16.225487 | 4.579485 | 35.519129 |
| C | 46.004240 | 4.260397 | 31.143681 | C  | 16.179739 | 4.842805 | 36.915763 |
| O | 49.604101 | 6.568142 | 27.938381 | C  | 15.381740 | 5.907688 | 37.380758 |
| O | 49.297833 | 4.393382 | 28.453837 | C  | 14.690933 | 6.714781 | 36.484084 |
| C | 49.382682 | 5.629761 | 28.784900 | C  | 14.759440 | 6.494033 | 35.119777 |
| C | 11.158286 | 7.260970 | 41.959133 | C  | 15.531763 | 5.424546 | 34.611418 |
| C | 10.287269 | 6.502976 | 41.186145 | O  | 14.059371 | 7.380821 | 34.305508 |
| C | 10.757253 | 5.394976 | 40.491133 | O  | 17.264824 | 5.485181 | 39.639212 |
| C | 12.099253 | 5.042971 | 40.571108 | O  | 16.712277 | 3.345295 | 40.090198 |
| C | 11.698221 | 3.178978 | 39.103109 | C  | 16.966393 | 4.295140 | 39.265832 |
| C | 10.356221 | 3.528983 | 39.024134 | C  | 12.972270 | 5.800966 | 41.346096 |
| C | 9.886237  | 4.637982 | 39.718146 | C  | 12.500286 | 6.908965 | 42.040108 |

|    |           |          |           |   |           |          |           |
|----|-----------|----------|-----------|---|-----------|----------|-----------|
| C  | 26.533421 | 7.057596 | 42.403616 | C | 37.394387 | 4.139684 | 40.728007 |
| C  | 25.766348 | 6.116505 | 41.749316 | C | 36.887413 | 4.931877 | 39.658046 |
| C  | 26.344264 | 4.963786 | 41.124995 | C | 37.725712 | 5.458146 | 38.703617 |
| C  | 27.772531 | 4.795193 | 41.237840 | C | 39.128411 | 5.234507 | 38.765192 |
| C  | 12.571237 | 3.934972 | 39.877096 | C | 39.668822 | 4.427088 | 39.766501 |
| C  | 27.612666 | 2.750519 | 39.929658 | O | 39.945478 | 5.803709 | 37.835746 |
| C  | 26.205987 | 2.910422 | 39.806734 | O | 34.991822 | 5.409547 | 41.821988 |
| C  | 25.565888 | 3.999642 | 40.389745 | O | 34.220044 | 3.359834 | 42.228461 |
| O  | 25.611122 | 1.914062 | 39.086308 | C | 35.151227 | 4.173034 | 41.935613 |
| O  | 15.285141 | 6.385438 | 41.388429 | C | 32.721047 | 4.965344 | 38.041689 |
| O  | 14.725657 | 4.250481 | 41.846590 | C | 33.467221 | 3.850650 | 37.695292 |
| C  | 14.412868 | 5.454493 | 41.529824 | C | 33.599455 | 3.484383 | 36.340333 |
| C  | 16.627454 | 5.788161 | 45.760711 | C | 32.951727 | 4.203667 | 35.357165 |
| C  | 17.642660 | 6.538396 | 46.382440 | C | 32.142298 | 5.346404 | 35.660061 |
| C  | 18.817970 | 6.880438 | 32.225938 | C | 32.046142 | 5.741902 | 37.043999 |
| C  | 17.744556 | 6.406726 | 32.973664 | C | 31.233323 | 6.865717 | 37.374760 |
| C  | 16.721284 | 5.646829 | 32.374439 | C | 30.562004 | 7.559136 | 36.401687 |
| C  | 15.481144 | 5.407086 | 46.512151 | C | 30.651792 | 7.180210 | 35.035602 |
| C  | 14.386278 | 4.746924 | 45.915329 | C | 31.427649 | 6.088898 | 34.653367 |
| C  | 13.282441 | 4.373720 | 46.678102 | O | 29.924003 | 7.988404 | 34.208322 |
| C  | 14.589532 | 4.470455 | 32.504475 | O | 32.764563 | 6.499318 | 39.850571 |
| C  | 15.616346 | 5.187413 | 33.135249 | O | 32.449441 | 4.304020 | 40.272885 |
| O  | 13.501162 | 4.029488 | 33.249154 | C | 32.627551 | 5.289046 | 39.502721 |
| O  | 17.134179 | 6.356631 | 43.507081 | C | 28.541041 | 5.798795 | 41.914056 |
| O  | 16.557842 | 4.224184 | 43.963201 | C | 27.933560 | 6.914646 | 42.466287 |
| C  | 16.783951 | 5.434032 | 44.326317 | C | 42.205334 | 6.872666 | 42.214557 |
| Cu | 32.544664 | 7.264024 | 41.663507 | C | 41.399114 | 6.055545 | 41.428491 |
| Cu | 32.522556 | 4.342448 | 42.244788 | C | 41.955380 | 5.035491 | 40.630564 |
| C  | 36.545037 | 3.631734 | 41.767309 | C | 43.363604 | 4.830664 | 40.656886 |
| C  | 37.042673 | 2.760705 | 42.716594 | C | 28.373792 | 3.662259 | 40.614781 |
| C  | 38.416188 | 2.421868 | 42.715707 | C | 43.100904 | 3.053685 | 39.021144 |
| C  | 39.273905 | 2.963602 | 41.782677 | C | 41.727997 | 3.227796 | 39.005215 |
| C  | 38.802718 | 3.842361 | 40.752768 | C | 41.135261 | 4.226477 | 39.804362 |



|    |           |          |           |   |           |          |           |
|----|-----------|----------|-----------|---|-----------|----------|-----------|
| O  | 40.992804 | 2.372784 | 38.189582 | C | 50.772469 | 4.699939 | 41.949646 |
| O  | 30.655887 | 6.799398 | 41.763502 | C | 48.256208 | 4.297270 | 37.816198 |
| O  | 30.579259 | 4.635766 | 42.334775 | C | 49.051335 | 3.245871 | 37.325946 |
| C  | 30.032407 | 5.727977 | 42.006917 | C | 49.121660 | 2.982032 | 35.964015 |
| C  | 32.450026 | 6.542046 | 45.856840 | C | 48.396290 | 3.758355 | 35.066164 |
| C  | 33.274217 | 7.436596 | 46.512533 | C | 47.563980 | 4.805628 | 35.513446 |
| C  | 34.764470 | 7.092153 | 32.127464 | C | 47.478375 | 5.068312 | 36.908946 |
| C  | 33.682863 | 6.747521 | 32.930425 | C | 46.591133 | 6.066838 | 37.358690 |
| C  | 32.607937 | 5.996993 | 32.417815 | C | 45.851686 | 6.814648 | 36.449032 |
| C  | 31.382580 | 5.878036 | 46.547943 | C | 45.954006 | 6.594122 | 35.086552 |
| C  | 30.464531 | 5.015403 | 45.881153 | C | 46.812905 | 5.585569 | 34.592991 |
| C  | 29.430079 | 4.421018 | 46.562176 | O | 45.196222 | 7.419344 | 34.259178 |
| C  | 30.423302 | 4.956096 | 32.689268 | O | 48.435868 | 5.784696 | 39.665038 |
| C  | 31.494130 | 5.677631 | 33.230242 | O | 48.119434 | 3.591930 | 40.086744 |
| O  | 29.322051 | 4.659610 | 33.482073 | C | 48.269162 | 4.574157 | 39.274954 |
| O  | 32.787067 | 7.282447 | 43.638204 | C | 44.175600 | 5.648201 | 41.489799 |
| O  | 32.748948 | 5.062852 | 44.057839 | C | 43.579789 | 6.677772 | 42.239250 |
| C  | 32.679978 | 6.276433 | 44.398717 | C | 43.921017 | 3.840327 | 39.824565 |
| Cu | 48.396665 | 6.300381 | 41.583816 | O | 46.412793 | 6.459851 | 41.480703 |
| Cu | 48.016682 | 3.863616 | 42.057702 | O | 46.074919 | 4.265097 | 41.876932 |
| C  | 52.242278 | 4.464620 | 41.931334 | C | 45.641105 | 5.443950 | 41.616464 |
| C  | 52.828353 | 3.947597 | 43.079285 | C | 47.861159 | 5.935822 | 45.792557 |
| C  | 54.201353 | 3.732577 | 43.123183 | C | 48.824439 | 6.739398 | 46.429629 |
| C  | 54.987278 | 4.036581 | 42.018131 | C | 50.016371 | 7.174395 | 32.172478 |
| C  | 54.401203 | 4.554604 | 40.869180 | C | 48.967301 | 6.662746 | 32.930481 |
| C  | 53.028203 | 4.768624 | 40.826281 | C | 47.992051 | 5.828605 | 32.350455 |
| C  | 52.442128 | 5.287648 | 39.677330 | C | 46.725935 | 5.491793 | 46.524974 |
| C  | 53.229054 | 5.591652 | 38.571278 | C | 45.680930 | 4.770082 | 45.910581 |
| C  | 54.601054 | 5.377632 | 38.616177 | C | 44.583302 | 4.342631 | 46.653515 |
| C  | 55.187129 | 4.858609 | 39.764128 | C | 45.930286 | 4.536226 | 32.506076 |
| O  | 55.314970 | 5.617639 | 37.405129 | C | 46.911648 | 5.327656 | 33.120553 |
| O  | 50.338489 | 5.886306 | 41.720010 | O | 44.865389 | 4.053960 | 33.259086 |
| O  | 49.998209 | 3.702612 | 42.175703 | O | 48.299677 | 6.576451 | 43.548833 |

|    |           |          |           |   |           |          |           |
|----|-----------|----------|-----------|---|-----------|----------|-----------|
| O  | 47.925684 | 4.392794 | 43.975672 | C | 13.380728 | 6.875095 | 52.012272 |
| C  | 48.044583 | 5.613345 | 44.355332 | C | 13.439659 | 6.648478 | 50.648152 |
| C  | 9.830848  | 7.260896 | 57.522290 | C | 14.221054 | 5.586363 | 50.137745 |
| C  | 8.959816  | 6.502907 | 56.749315 | O | 12.723895 | 7.524711 | 49.836146 |
| C  | 9.429783  | 5.394908 | 56.054291 | O | 15.941089 | 5.642761 | 55.206557 |
| C  | 10.771783 | 5.042898 | 56.134241 | O | 15.428636 | 3.478859 | 55.584991 |
| C  | 10.370718 | 3.178911 | 54.666243 | C | 15.671739 | 4.457959 | 54.793441 |
| C  | 9.028718  | 3.528920 | 54.587293 | C | 11.644816 | 5.800887 | 56.909216 |
| C  | 8.558750  | 4.637919 | 55.281317 | C | 11.172849 | 6.908886 | 57.603240 |
| O  | 8.125684  | 2.792932 | 53.781319 | C | 25.317185 | 7.079411 | 57.558387 |
| Cu | 15.892571 | 6.129113 | 57.135570 | C | 24.479463 | 6.245554 | 56.825708 |
| Cu | 15.336776 | 3.718257 | 57.557746 | C | 24.990069 | 5.137637 | 56.117911 |
| C  | 19.590647 | 4.027466 | 57.441808 | C | 26.387662 | 4.874947 | 56.165058 |
| C  | 20.139638 | 3.263088 | 58.486987 | C | 11.243751 | 3.934900 | 55.440217 |
| C  | 21.493968 | 2.949361 | 58.504205 | C | 26.055805 | 3.009551 | 54.642730 |
| C  | 22.323244 | 3.384055 | 57.474489 | C | 24.689322 | 3.227966 | 54.623157 |
| C  | 21.810178 | 4.126905 | 56.393467 | C | 24.130456 | 4.296264 | 55.361240 |
| C  | 20.423547 | 4.439838 | 56.364746 | O | 23.923249 | 2.340896 | 53.870891 |
| C  | 19.903904 | 5.119991 | 55.242836 | O | 13.936631 | 6.427924 | 56.975039 |
| C  | 20.741511 | 5.515351 | 54.203052 | O | 13.428930 | 4.268725 | 57.377123 |
| C  | 22.107119 | 5.248878 | 54.249066 | C | 13.088397 | 5.472720 | 57.087646 |
| C  | 22.653514 | 4.546746 | 55.333291 | C | 15.283046 | 5.695821 | 61.352095 |
| O  | 22.932301 | 5.650852 | 53.204605 | C | 16.314087 | 6.385804 | 61.978046 |
| O  | 17.796243 | 5.583138 | 57.300418 | C | 17.561855 | 6.869336 | 47.729617 |
| O  | 17.302248 | 3.413307 | 57.672312 | C | 16.464285 | 6.463130 | 48.481202 |
| C  | 18.144614 | 4.361982 | 57.482272 | C | 15.412745 | 5.732106 | 47.894850 |
| C  | 15.640629 | 4.204372 | 53.331730 | C | 14.198081 | 5.242825 | 62.095148 |
| C  | 16.359339 | 3.106164 | 52.826302 | C | 13.166040 | 4.552842 | 61.469196 |
| C  | 16.385778 | 2.839322 | 51.463603 | C | 12.083075 | 4.099846 | 62.213249 |
| C  | 15.690899 | 3.659043 | 50.580626 | C | 13.235852 | 4.644801 | 48.042867 |
| C  | 14.938121 | 4.758670 | 51.043648 | C | 14.288800 | 5.333778 | 48.662236 |
| C  | 14.898697 | 5.026302 | 52.440115 | O | 12.129439 | 4.262190 | 48.793123 |
| C  | 14.089462 | 6.081285 | 52.907184 | O | 15.760635 | 6.374310 | 59.110960 |

|    |           |          |           |    |           |          |           |
|----|-----------|----------|-----------|----|-----------|----------|-----------|
| O  | 15.280820 | 4.203286 | 59.484350 | C  | 26.678842 | 6.813601 | 57.622880 |
| C  | 15.446887 | 5.407598 | 59.895730 | C  | 40.912483 | 6.945103 | 57.611651 |
| Cu | 31.474279 | 6.145566 | 57.138444 | C  | 40.085211 | 6.123855 | 56.855795 |
| Cu | 30.968633 | 3.721595 | 57.552473 | C  | 40.603974 | 5.025872 | 56.138085 |
| C  | 35.209866 | 4.088117 | 57.458246 | C  | 42.002767 | 4.764716 | 56.193007 |
| C  | 35.751466 | 3.365493 | 58.536839 | C  | 26.905259 | 3.816512 | 55.391698 |
| C  | 37.099113 | 3.026789 | 58.562870 | C  | 41.683130 | 2.912886 | 54.652960 |
| C  | 37.929344 | 3.392877 | 57.508334 | C  | 40.316577 | 3.133351 | 54.620195 |
| C  | 37.425467 | 4.098170 | 56.398084 | C  | 39.750285 | 4.195721 | 55.361781 |
| C  | 36.045224 | 4.439937 | 56.362839 | O  | 39.557673 | 2.250684 | 53.855690 |
| C  | 35.533711 | 5.086211 | 55.218408 | O  | 29.504281 | 6.409420 | 57.014829 |
| C  | 36.373284 | 5.415849 | 54.157267 | O  | 29.054305 | 4.229716 | 57.376541 |
| C  | 37.733557 | 5.120847 | 54.206962 | C  | 28.681571 | 5.430616 | 57.121563 |
| C  | 38.272941 | 4.454988 | 55.317919 | C  | 30.903120 | 5.695641 | 61.351269 |
| O  | 38.560338 | 5.461562 | 53.142280 | C  | 31.934175 | 6.385618 | 61.977205 |
| O  | 33.394547 | 5.625351 | 57.276093 | C  | 33.106267 | 7.665079 | 47.897083 |
| O  | 32.933425 | 3.452123 | 57.671139 | C  | 32.105506 | 7.025040 | 48.597334 |
| C  | 33.761060 | 4.410980 | 57.475680 | C  | 31.196960 | 6.120747 | 47.955832 |
| C  | 31.295403 | 4.234979 | 53.324925 | C  | 29.818167 | 5.242646 | 62.094340 |
| C  | 32.099723 | 3.196107 | 52.823374 | C  | 28.786113 | 4.552669 | 61.468405 |
| C  | 32.210205 | 2.979291 | 51.455247 | C  | 27.703159 | 4.099675 | 62.212476 |
| C  | 31.515406 | 3.790221 | 50.563277 | C  | 29.256995 | 4.628794 | 47.956525 |
| C  | 30.668499 | 4.819163 | 51.022636 | C  | 30.124504 | 5.467113 | 48.653993 |
| C  | 30.543825 | 5.035507 | 52.422700 | O  | 28.236605 | 4.007268 | 48.611685 |
| C  | 29.649337 | 6.023479 | 52.880369 | O  | 31.366724 | 6.380565 | 59.113218 |
| C  | 28.932512 | 6.797924 | 51.973083 | O  | 30.904188 | 4.204541 | 59.481237 |
| C  | 29.073818 | 6.620915 | 50.607737 | C  | 31.063894 | 5.409405 | 59.895328 |
| C  | 29.945186 | 5.629581 | 50.113222 | Cu | 47.048987 | 6.244385 | 57.149430 |
| O  | 28.339999 | 7.467450 | 49.782045 | Cu | 46.688733 | 3.789862 | 57.536779 |
| O  | 31.507076 | 5.673086 | 55.206761 | C  | 50.914829 | 4.464394 | 57.493750 |
| O  | 31.070215 | 3.490891 | 55.575542 | C  | 51.500923 | 3.947364 | 58.641689 |
| C  | 31.285939 | 4.480646 | 54.788528 | C  | 52.873923 | 3.732339 | 58.685563 |
| C  | 27.230218 | 5.704126 | 56.956354 | C  | 53.659830 | 4.036343 | 57.580498 |

|   |           |          |           |   |           |          |           |
|---|-----------|----------|-----------|---|-----------|----------|-----------|
| C | 53.073736 | 4.554373 | 56.431559 | C | 47.614518 | 6.605435 | 48.507003 |
| C | 51.700736 | 4.768398 | 56.388685 | C | 46.615308 | 5.815505 | 47.905011 |
| C | 51.114643 | 5.287428 | 55.239746 | C | 45.438253 | 5.242413 | 62.093251 |
| C | 51.901549 | 5.591433 | 54.133681 | C | 44.406185 | 4.552442 | 61.467332 |
| C | 53.273549 | 5.377407 | 54.178555 | C | 43.323243 | 4.099449 | 62.211421 |
| C | 53.859642 | 4.858378 | 55.326493 | C | 44.497768 | 4.612753 | 48.016762 |
| O | 53.987445 | 5.617415 | 52.967495 | C | 45.502294 | 5.356012 | 48.654391 |
| O | 48.992472 | 5.856373 | 57.300794 | O | 43.398305 | 4.175656 | 48.746884 |
| O | 48.676948 | 3.652321 | 57.668811 | O | 46.917668 | 6.441386 | 59.125117 |
| C | 49.440179 | 4.670381 | 57.496804 | O | 46.577964 | 4.237028 | 59.466911 |
| C | 46.958343 | 4.348887 | 53.320600 | C | 46.674831 | 5.442384 | 59.893497 |
| C | 47.780011 | 3.327322 | 52.811093 | C | 16.262162 | 6.620790 | 63.347051 |
| C | 47.825382 | 3.063216 | 51.448779 | C | 15.179196 | 6.168795 | 64.090104 |
| C | 47.048804 | 3.809935 | 50.569659 | C | 14.147156 | 5.478812 | 63.465153 |
| C | 46.197873 | 4.834553 | 51.035646 | C | 12.031150 | 4.336833 | 63.582254 |
| C | 46.138101 | 5.096709 | 52.432497 | C | 13.063191 | 5.025817 | 64.207206 |
| C | 45.233668 | 6.069166 | 52.903219 | O | 10.943187 | 3.908837 | 64.361307 |
| C | 44.449602 | 6.792455 | 52.011117 | C | 31.882275 | 6.620600 | 63.346211 |
| C | 44.526507 | 6.574953 | 50.646234 | C | 30.799322 | 6.168606 | 64.089282 |
| C | 45.404706 | 5.592876 | 50.131766 | C | 29.767267 | 5.478629 | 63.464346 |
| O | 43.732712 | 7.384708 | 49.837444 | C | 27.651260 | 4.336658 | 63.581482 |
| O | 47.119184 | 5.792284 | 55.211222 | C | 28.683314 | 5.025635 | 64.206417 |
| O | 46.811675 | 3.585518 | 55.563773 | O | 26.563309 | 3.908663 | 64.360554 |
| C | 46.962128 | 4.591992 | 54.784206 | C | 47.502389 | 6.620356 | 63.345091 |
| C | 42.838408 | 5.593344 | 56.992114 | C | 46.419447 | 6.168363 | 64.088179 |
| C | 42.274027 | 6.685354 | 57.678079 | C | 45.387379 | 5.478391 | 63.463260 |
| C | 42.526894 | 3.713060 | 55.416331 | C | 43.271369 | 4.336426 | 63.580429 |
| O | 45.073265 | 6.391576 | 57.021074 | C | 44.303437 | 5.025398 | 64.205349 |
| O | 44.740521 | 4.186605 | 57.355219 | O | 42.183431 | 3.908432 | 64.359519 |
| C | 44.303101 | 5.371693 | 57.122718 | H | 12.119370 | 8.127103 | 26.935477 |
| C | 46.523195 | 5.695406 | 61.350162 | H | 10.572727 | 6.787268 | 25.566452 |
| C | 47.554262 | 6.385378 | 61.976082 | H | 13.377754 | 2.322876 | 22.980214 |
| C | 48.702647 | 7.067445 | 47.774274 | H | 9.846122  | 3.167855 | 22.675435 |

|   |           |          |           |   |           |          |           |
|---|-----------|----------|-----------|---|-----------|----------|-----------|
| H | 22.102474 | 2.821734 | 28.228025 | H | 41.681012 | 6.270420 | 25.708440 |
| H | 24.504043 | 2.292665 | 28.300132 | H | 30.634321 | 3.583016 | 24.399260 |
| H | 26.009213 | 3.104639 | 26.555995 | H | 44.798925 | 1.912701 | 23.168287 |
| H | 21.519485 | 5.291053 | 24.085747 | H | 35.645955 | 6.979279 | 30.183997 |
| H | 23.030247 | 6.048983 | 22.359269 | H | 31.478944 | 4.575232 | 29.498659 |
| H | 19.532148 | 2.329264 | 22.590171 | H | 29.606512 | 4.032809 | 30.929808 |
| H | 19.679021 | 1.794023 | 20.190610 | H | 31.291248 | 6.863217 | 17.594900 |
| H | 18.480548 | 3.170353 | 18.536430 | H | 40.796501 | 5.750651 | 21.329269 |
| H | 16.650249 | 6.140419 | 22.827024 | H | 41.288726 | 2.263069 | 22.885737 |
| H | 15.505628 | 7.501824 | 21.158911 | H | 53.552148 | 3.699851 | 28.381689 |
| H | 14.495782 | 7.508469 | 27.087682 | H | 55.987724 | 3.326094 | 28.455521 |
| H | 27.618183 | 8.056914 | 26.952720 | H | 57.384426 | 3.866088 | 26.498127 |
| H | 26.117482 | 6.545711 | 25.764969 | H | 52.704036 | 5.448100 | 24.015384 |
| H | 14.941677 | 3.638871 | 24.310055 | H | 54.083195 | 5.976006 | 22.116677 |
| H | 29.108464 | 2.114211 | 23.204351 | H | 50.778385 | 2.335037 | 22.589416 |
| H | 19.756287 | 6.952473 | 30.305618 | H | 50.920987 | 1.795422 | 20.189901 |
| H | 15.698463 | 4.474061 | 29.310672 | H | 49.720850 | 3.170558 | 18.535633 |
| H | 13.836722 | 3.701636 | 30.644881 | H | 47.862913 | 6.130289 | 22.823632 |
| H | 15.670377 | 6.862986 | 17.594960 | H | 46.740238 | 7.497712 | 21.158846 |
| H | 25.169504 | 6.227671 | 21.560124 | H | 45.533270 | 7.339930 | 27.143323 |
| H | 25.594119 | 2.493335 | 23.030786 | H | 46.271551 | 3.373026 | 24.442585 |
| H | 37.753609 | 3.008177 | 28.303520 | H | 50.956491 | 7.246041 | 30.251969 |
| H | 40.135207 | 2.400661 | 28.377825 | H | 47.062109 | 4.500907 | 29.320220 |
| H | 41.626244 | 2.994563 | 26.538326 | H | 45.234801 | 3.669170 | 30.667358 |
| H | 37.168790 | 5.166703 | 23.996965 | H | 46.912735 | 6.863905 | 17.594429 |
| H | 38.666968 | 5.706887 | 22.173891 | H | 56.063092 | 5.977865 | 21.099171 |
| H | 35.151422 | 2.330072 | 22.590899 | H | 10.790899 | 8.127462 | 42.499104 |
| H | 35.298699 | 1.793815 | 20.190412 | H | 9.244091  | 6.787402 | 41.130360 |
| H | 34.100181 | 3.170182 | 18.536189 | H | 12.049826 | 2.325142 | 38.541278 |
| H | 32.261822 | 6.137874 | 22.825956 | H | 8.517974  | 3.169198 | 38.238704 |
| H | 31.123245 | 7.500060 | 21.159045 | H | 20.640888 | 2.898646 | 44.011522 |
| H | 30.028761 | 7.587662 | 27.075446 | H | 23.023271 | 2.344811 | 44.272902 |
| H | 43.119565 | 7.763134 | 26.982939 | H | 24.640620 | 2.962839 | 42.549125 |

|   |           |          |           |   |           |          |           |
|---|-----------|----------|-----------|---|-----------|----------|-----------|
| H | 20.339150 | 5.000813 | 39.652300 | H | 40.332825 | 6.232831 | 41.443582 |
| H | 21.959578 | 5.530938 | 37.929141 | H | 29.453241 | 3.522154 | 40.676701 |
| H | 18.138062 | 2.239313 | 37.986620 | H | 43.532240 | 2.289896 | 38.387653 |
| H | 18.179153 | 1.771996 | 35.571806 | H | 34.062606 | 7.949857 | 45.954894 |
| H | 17.010888 | 3.230430 | 34.005029 | H | 35.578163 | 7.681075 | 32.538197 |
| H | 15.266442 | 6.122985 | 38.436023 | H | 33.685938 | 7.085654 | 33.959240 |
| H | 14.084172 | 7.533922 | 36.845217 | H | 30.573044 | 4.816173 | 44.814977 |
| H | 13.169252 | 7.508328 | 42.649159 | H | 28.730295 | 3.770235 | 46.024332 |
| H | 26.054240 | 7.927751 | 42.863351 | H | 28.639167 | 4.087164 | 33.007570 |
| H | 24.684361 | 6.277134 | 41.708001 | H | 29.960940 | 7.710102 | 33.280328 |
| H | 13.612641 | 3.640435 | 39.863317 | H | 39.416184 | 6.294644 | 37.186283 |
| H | 28.068624 | 1.883439 | 39.444305 | H | 39.997555 | 2.532695 | 38.235350 |
| H | 18.509178 | 6.858050 | 45.813242 | H | 52.223642 | 3.704278 | 43.946438 |
| H | 19.589194 | 7.476647 | 32.702581 | H | 54.659165 | 3.326852 | 44.019235 |
| H | 17.710857 | 6.652999 | 34.026775 | H | 56.055723 | 3.866048 | 42.061517 |
| H | 14.358603 | 4.524213 | 44.855267 | H | 51.375279 | 5.450197 | 39.581159 |
| H | 12.458986 | 3.863865 | 46.198051 | H | 52.754484 | 5.976134 | 37.680116 |
| H | 12.840750 | 3.500867 | 32.698673 | H | 49.632256 | 2.637188 | 38.010803 |
| H | 14.128624 | 7.157653 | 33.326865 | H | 49.745884 | 2.172618 | 35.599941 |
| H | 24.146979 | 5.599568 | 37.242811 | H | 48.478342 | 3.521114 | 34.014661 |
| H | 24.655327 | 2.044177 | 38.986345 | H | 46.443070 | 6.274365 | 38.411344 |
| H | 36.371321 | 2.372686 | 43.487306 | H | 45.177068 | 7.584170 | 36.798443 |
| H | 38.805577 | 1.743596 | 43.481554 | H | 44.191222 | 7.320358 | 42.863983 |
| H | 40.336777 | 2.707456 | 41.831309 | H | 44.989987 | 3.668214 | 39.773240 |
| H | 35.815604 | 5.121802 | 39.586035 | H | 49.679106 | 7.108693 | 45.872720 |
| H | 37.310035 | 6.055390 | 37.883102 | H | 50.750262 | 7.827026 | 32.633846 |
| H | 33.944307 | 3.262554 | 38.483479 | H | 48.913766 | 6.937014 | 33.975833 |
| H | 34.205188 | 2.613818 | 36.069245 | H | 45.688679 | 4.538701 | 44.852005 |
| H | 33.061938 | 3.872062 | 34.319743 | H | 43.796488 | 3.789414 | 46.159993 |
| H | 31.142402 | 7.175639 | 38.415499 | H | 44.241647 | 3.469443 | 32.722654 |
| H | 29.931061 | 8.417059 | 36.649513 | H | 45.305348 | 7.205576 | 33.282013 |
| H | 28.550220 | 7.676128 | 42.949872 | H | 54.733421 | 5.973037 | 36.660950 |
| H | 41.762734 | 7.658933 | 42.814879 | H | 9.463506  | 8.126829 | 58.063134 |

|                                |                                |
|--------------------------------|--------------------------------|
| H 7.916605 6.787083 56.694063  | H 32.843585 2.181437 51.081393 |
| H 10.722410 2.324956 54.104727 | H 31.631070 3.593129 49.505157 |
| H 7.190376 3.168797 53.802850  | H 29.480882 6.200760 53.936406 |
| H 19.507729 2.919434 59.299049 | H 28.248067 7.557075 52.327597 |
| H 21.905318 2.366467 59.321703 | H 27.314604 7.466896 58.211005 |
| H 23.371960 3.121702 57.520799 | H 40.494279 7.790324 58.148336 |
| H 18.847866 5.342427 55.145215 | H 39.032387 6.365988 56.824472 |
| H 20.319110 6.038024 53.356380 | H 27.966437 3.606819 55.338434 |
| H 16.908211 2.457548 53.500662 | H 42.089228 2.101518 54.064583 |
| H 16.947931 1.990822 51.087584 | H 32.788421 6.739923 61.409690 |
| H 15.732494 3.414271 49.528554 | H 33.775067 8.358457 48.417075 |
| H 13.980761 6.300379 53.962388 | H 32.001760 7.228669 49.667866 |
| H 12.766892 7.688281 52.374810 | H 28.749314 4.379529 60.400407 |
| H 11.840497 7.509056 58.213286 | H 26.897626 3.574621 61.720244 |
| H 24.905777 7.934179 58.085088 | H 27.739004 3.452013 47.989473 |
| H 23.425585 6.485198 56.802431 | H 28.479278 7.284617 48.799238 |
| H 12.285084 3.640674 55.426536 | H 38.073877 5.967243 52.416946 |
| H 26.456873 2.194068 54.056523 | H 38.575402 2.467686 53.862477 |
| H 17.168825 6.739444 61.410817 | H 50.895049 3.699562 59.506766 |
| H 18.356642 7.441993 48.196360 | H 53.331422 3.325561 59.581254 |
| H 16.435669 6.738015 49.527246 | H 54.728193 3.865562 57.623768 |
| H 13.128508 4.380832 60.401068 | H 50.048142 5.455201 55.146464 |
| H 11.277598 3.574663 61.721067 | H 51.426938 5.977204 53.243093 |
| H 11.453286 3.742541 48.253335 | H 48.392173 2.734790 53.482802 |
| H 12.794754 7.302849 48.857450 | H 48.464937 2.272584 51.070408 |
| H 22.438971 6.174215 52.496703 | H 47.106609 3.566435 49.518236 |
| H 22.941328 2.559820 53.882015 | H 45.108848 6.276190 53.959179 |
| H 35.116591 3.066232 59.364051 | H 43.761295 7.542138 52.376858 |
| H 37.503289 2.473202 59.403970 | H 42.902941 7.338242 58.274127 |
| H 38.971600 3.107165 57.559593 | H 43.588195 3.501968 55.373732 |
| H 34.483020 5.334704 55.122664 | H 48.406274 6.744633 61.408085 |
| H 35.957353 5.912580 53.291892 | H 49.455858 7.684667 48.252912 |
| H 32.659413 2.563509 53.504071 | H 47.550999 6.883618 49.550597 |

|   |           |           |           |              |           |           |           |
|---|-----------|-----------|-----------|--------------|-----------|-----------|-----------|
| H | 44.382077 | 4.368277  | 60.399975 | C            | 37.895022 | 7.061527  | 43.433889 |
| H | 42.519429 | 3.571442  | 61.719562 | C            | 38.994145 | 7.868521  | 43.775285 |
| H | 42.760239 | 3.619636  | 48.196860 | C            | 39.518880 | 7.833953  | 45.069541 |
| H | 43.817511 | 7.167534  | 48.859142 | C            | 38.945901 | 7.010323  | 46.045434 |
| H | 53.405536 | 5.972351  | 52.223367 | C            | 37.836423 | 6.223214  | 45.711322 |
| H | 17.068094 | 7.157953  | 63.835986 | C            | 37.309458 | 6.243448  | 44.418383 |
| H | 15.148345 | 6.357534  | 65.155915 | N            | 37.320125 | 7.137583  | 42.157692 |
| H | 10.258596 | 3.420391  | 63.803975 | H            | 35.000331 | 9.413246  | 38.935267 |
| H | 32.688052 | 7.158042  | 63.835068 | H            | 35.034046 | 7.299314  | 40.313730 |
| H | 30.768378 | 6.357485  | 65.155053 | H            | 35.091866 | 7.556366  | 42.817679 |
| H | 25.877478 | 3.422597  | 63.802684 | H            | 34.843569 | 11.133888 | 40.713960 |
| H | 48.307555 | 7.158926  | 63.833660 | H            | 36.353253 | 11.399402 | 39.812276 |
| H | 46.388350 | 6.357497  | 65.153875 | H            | 37.628829 | 10.138744 | 41.585870 |
| H | 41.497299 | 3.423012  | 63.801422 | H            | 36.799697 | 11.548508 | 42.272296 |
| H | 54.923364 | 4.683318  | 55.324879 | H            | 35.011557 | 10.138270 | 43.216757 |
| H | 56.250908 | 4.683600  | 39.762528 | H            | 36.549039 | 9.395563  | 43.668755 |
| H | 57.579678 | 4.683861  | 24.199224 | H            | 36.632939 | 8.951492  | 39.471710 |
| H | 32.653505 | 5.044465  | 18.025502 | H            | 39.430309 | 8.527851  | 43.016460 |
| H | 17.033768 | 5.044633  | 18.025670 | H            | 40.380462 | 8.462576  | 45.318211 |
| H | 10.175615 | 4.914249  | 24.088542 | H            | 39.357445 | 6.986405  | 47.058975 |
| H | 8.847003  | 4.914442  | 39.652550 | H            | 37.372878 | 5.578944  | 46.465364 |
| H | 7.519560  | 4.914412  | 55.215976 | H            | 36.446080 | 5.624910  | 44.157474 |
| H | 12.997579 | 5.198435  | 65.269740 | H            | 37.952290 | 7.400505  | 41.403756 |
| H | 28.617624 | 5.198373  | 65.268908 | H            | 36.720217 | 6.343484  | 41.900708 |
| H | 44.237735 | 5.198152  | 65.267813 |              |           |           |           |
| H | 48.273515 | 5.044295  | 18.025049 | (R,R)-1-Int1 |           |           |           |
| C | 35.444293 | 8.362606  | 42.178029 | C            | 12.487000 | 7.261000  | 26.395000 |
| C | 35.054329 | 8.303079  | 40.761200 | C            | 11.616000 | 6.503000  | 25.622000 |
| C | 35.654774 | 9.338588  | 39.821898 | C            | 12.086000 | 5.395000  | 24.927000 |
| C | 35.838474 | 10.703514 | 40.498368 | C            | 13.428000 | 5.043000  | 25.007000 |
| C | 36.628266 | 10.561451 | 41.807946 | C            | 13.027000 | 3.179000  | 23.539000 |
| C | 35.907810 | 9.640745  | 42.803485 | C            | 11.685000 | 3.529000  | 23.460000 |
| O | 33.811435 | 8.689173  | 41.317916 | C            | 11.215000 | 4.638000  | 24.154000 |



|    |           |          |           |    |           |          |           |
|----|-----------|----------|-----------|----|-----------|----------|-----------|
| O  | 10.782000 | 2.793000 | 22.654000 | C  | 28.021199 | 7.174712 | 26.466282 |
| Cu | 18.541005 | 6.085547 | 26.019072 | C  | 27.171709 | 6.306698 | 25.787129 |
| Cu | 17.952304 | 3.697441 | 26.526471 | C  | 27.671539 | 5.165157 | 25.127232 |
| C  | 22.218138 | 3.963576 | 26.392874 | C  | 29.068273 | 4.899079 | 25.175052 |
| C  | 22.749609 | 3.184297 | 27.436449 | C  | 13.900000 | 3.935000 | 24.313000 |
| C  | 24.106882 | 2.885553 | 27.482722 | C  | 28.715845 | 2.960227 | 23.751745 |
| C  | 24.958091 | 3.351830 | 26.485100 | C  | 27.350933 | 3.185520 | 23.730352 |
| C  | 24.464012 | 4.106708 | 25.403980 | C  | 26.803103 | 4.292545 | 24.417520 |
| C  | 23.074193 | 4.401754 | 25.343125 | O  | 26.575441 | 2.270739 | 23.022203 |
| C  | 22.576100 | 5.089841 | 24.215871 | O  | 16.592685 | 6.402792 | 25.852021 |
| C  | 23.436848 | 5.518355 | 23.208793 | O  | 16.053524 | 4.263613 | 26.321043 |
| C  | 24.804000 | 5.269994 | 23.287917 | C  | 15.733683 | 5.460916 | 25.984876 |
| C  | 25.329214 | 4.553561 | 24.372984 | C  | 17.923420 | 5.802433 | 30.237103 |
| O  | 25.651769 | 5.701147 | 22.273383 | C  | 18.906488 | 6.584482 | 30.870694 |
| O  | 20.435127 | 5.524410 | 26.197811 | C  | 16.796475 | 5.357804 | 30.984231 |
| O  | 19.918955 | 3.374875 | 26.645635 | C  | 15.725262 | 4.668871 | 30.376182 |
| C  | 20.771989 | 4.307335 | 26.419216 | C  | 14.641583 | 4.232146 | 31.134056 |
| C  | 18.226927 | 4.022014 | 22.293999 | O  | 18.425286 | 6.399434 | 27.984244 |
| C  | 18.992915 | 2.941012 | 21.873981 | O  | 17.904642 | 4.251133 | 28.432477 |
| C  | 19.081890 | 2.638017 | 20.519979 | C  | 18.097412 | 5.464570 | 28.800139 |
| C  | 18.404876 | 3.417023 | 19.587993 | Cu | 34.183736 | 6.119025 | 26.005245 |
| C  | 17.639888 | 4.497024 | 20.008011 | Cu | 33.620026 | 3.737715 | 26.564834 |
| C  | 17.550913 | 4.800019 | 21.362013 | C  | 37.869834 | 3.986729 | 26.375881 |
| C  | 16.783924 | 5.881020 | 21.784030 | C  | 38.396831 | 3.282890 | 27.474228 |
| C  | 16.107910 | 6.659026 | 20.850045 | C  | 39.742103 | 2.937671 | 27.520812 |
| C  | 16.197885 | 6.355031 | 19.497042 | C  | 40.585187 | 3.280940 | 26.469041 |
| C  | 16.963875 | 5.274030 | 19.076025 | C  | 40.095310 | 3.963911 | 25.338748 |
| O  | 15.523872 | 7.185037 | 18.539057 | C  | 38.716552 | 4.306855 | 25.279671 |
| O  | 18.566867 | 5.529630 | 24.111016 | C  | 38.218908 | 4.924438 | 24.113343 |
| O  | 18.023068 | 3.388865 | 24.570326 | C  | 39.071937 | 5.230465 | 23.055697 |
| C  | 18.264899 | 4.337454 | 23.743465 | C  | 40.431823 | 4.939539 | 23.130555 |
| C  | 14.301000 | 5.801000 | 25.782000 | C  | 40.956309 | 4.299452 | 24.263263 |
| C  | 13.829000 | 6.909000 | 26.476000 | O  | 41.273369 | 5.259549 | 22.070924 |

|   |           |          |           |    |           |          |           |
|---|-----------|----------|-----------|----|-----------|----------|-----------|
| O | 36.090258 | 5.554975 | 26.130365 | C  | 32.638904 | 5.580536 | 31.056704 |
| O | 35.579976 | 3.418910 | 26.647054 | C  | 31.530366 | 4.880404 | 30.537105 |
| C | 36.428909 | 4.343684 | 26.387627 | C  | 30.443217 | 4.572520 | 31.351618 |
| C | 33.846854 | 4.021972 | 22.293718 | O  | 34.140415 | 6.459722 | 27.964015 |
| C | 34.612831 | 2.940969 | 21.873683 | O  | 33.622380 | 4.324151 | 28.471587 |
| C | 34.701781 | 2.637978 | 20.519678 | C  | 33.845740 | 5.542401 | 28.810118 |
| C | 34.024753 | 3.416989 | 19.587708 | Cu | 49.700141 | 6.207575 | 25.980832 |
| C | 33.259776 | 4.496991 | 20.007741 | Cu | 49.346534 | 3.791293 | 26.560551 |
| C | 33.170826 | 4.799983 | 21.361747 | C  | 53.571003 | 4.464792 | 26.367939 |
| C | 32.403848 | 5.880986 | 21.783781 | C  | 54.157058 | 3.947774 | 27.515902 |
| C | 31.727821 | 6.658997 | 20.849810 | C  | 55.530059 | 3.732759 | 27.559826 |
| C | 31.817771 | 6.355005 | 19.496805 | C  | 56.316002 | 4.036762 | 26.454787 |
| C | 32.583748 | 5.274002 | 19.075771 | C  | 55.729946 | 4.554780 | 25.305823 |
| O | 31.143743 | 7.185016 | 18.538835 | C  | 54.356947 | 4.768795 | 25.262899 |
| O | 34.162978 | 5.545891 | 24.103370 | C  | 53.770890 | 5.287813 | 24.113936 |
| O | 33.652866 | 3.405857 | 24.595376 | C  | 54.557834 | 5.591815 | 23.007897 |
| C | 33.879930 | 4.345752 | 23.750071 | C  | 55.929834 | 5.377800 | 23.052821 |
| C | 29.922427 | 5.762612 | 25.916003 | C  | 56.515889 | 4.858782 | 24.200784 |
| C | 29.383588 | 6.908012 | 26.529164 | O  | 56.643771 | 5.617805 | 21.841785 |
| C | 43.549375 | 6.898537 | 26.487857 | O  | 51.642672 | 5.838949 | 26.127013 |
| C | 42.735479 | 6.038763 | 25.759858 | O  | 51.338324 | 3.661582 | 26.634248 |
| C | 43.270083 | 4.916598 | 25.092428 | C  | 52.096362 | 4.667229 | 26.380447 |
| C | 44.668874 | 4.667356 | 25.175299 | C  | 49.466779 | 4.021876 | 22.293156 |
| C | 29.574601 | 3.800110 | 24.451687 | C  | 50.232745 | 2.940872 | 21.873104 |
| C | 44.380974 | 2.748001 | 23.713349 | C  | 50.321669 | 2.637885 | 20.519096 |
| C | 43.014643 | 2.962119 | 23.648518 | C  | 49.644627 | 3.416901 | 19.587140 |
| C | 42.433023 | 4.050963 | 24.337522 | C  | 48.879661 | 4.496905 | 20.007192 |
| O | 42.271368 | 2.048041 | 22.906111 | C  | 48.790737 | 4.799893 | 21.361200 |
| O | 32.214143 | 6.427886 | 25.911281 | C  | 48.023772 | 5.880897 | 21.783251 |
| O | 31.718911 | 4.286265 | 26.413948 | C  | 47.347731 | 6.658913 | 20.849295 |
| C | 31.370527 | 5.476623 | 26.088518 | C  | 47.437655 | 6.354926 | 19.496287 |
| C | 33.757985 | 5.920884 | 30.246000 | C  | 48.203620 | 5.273922 | 19.075235 |
| C | 34.799065 | 6.690703 | 30.797714 | O  | 46.763613 | 7.184943 | 18.538331 |

|    |           |          |           |   |           |          |           |
|----|-----------|----------|-----------|---|-----------|----------|-----------|
| O  | 49.738719 | 5.591850 | 24.085275 | C | 21.382646 | 4.778226 | 39.846567 |
| O  | 49.388331 | 3.427566 | 24.604383 | C | 22.306485 | 5.078770 | 38.848020 |
| C  | 49.528321 | 4.370170 | 23.746340 | C | 23.661212 | 4.812011 | 39.027049 |
| C  | 45.489980 | 5.537977 | 25.942993 | C | 24.109894 | 4.211957 | 40.209666 |
| C  | 44.912923 | 6.654505 | 26.575649 | O | 24.570478 | 5.118704 | 38.022835 |
| C  | 45.209176 | 3.583603 | 24.455339 | O | 19.132926 | 5.439097 | 41.731471 |
| O  | 47.720903 | 6.342657 | 25.876978 | O | 18.570283 | 3.307804 | 42.211888 |
| O  | 47.395650 | 4.176003 | 26.411962 | C | 19.443563 | 4.223995 | 42.004420 |
| C  | 46.954545 | 5.335584 | 26.081153 | C | 16.906896 | 4.010773 | 37.810476 |
| C  | 49.193466 | 5.991037 | 30.213388 | C | 17.602708 | 2.896260 | 37.309653 |
| C  | 50.127770 | 6.845494 | 30.826194 | C | 17.631427 | 2.630696 | 35.945859 |
| C  | 48.091309 | 5.503492 | 30.969836 | C | 16.963172 | 3.469068 | 35.058456 |
| C  | 47.066912 | 4.733823 | 30.378465 | C | 16.225487 | 4.579485 | 35.519129 |
| C  | 46.004240 | 4.260397 | 31.143681 | C | 16.179739 | 4.842805 | 36.915763 |
| O  | 49.604101 | 6.568142 | 27.938381 | C | 15.381740 | 5.907688 | 37.380758 |
| O  | 49.297833 | 4.393382 | 28.453837 | C | 14.690933 | 6.714781 | 36.484084 |
| C  | 49.382682 | 5.629761 | 28.784900 | C | 14.759440 | 6.494033 | 35.119777 |
| C  | 11.158286 | 7.260970 | 41.959133 | C | 15.531763 | 5.424546 | 34.611418 |
| C  | 10.287269 | 6.502976 | 41.186145 | O | 14.059371 | 7.380821 | 34.305508 |
| C  | 10.757253 | 5.394976 | 40.491133 | O | 17.264824 | 5.485181 | 39.639212 |
| C  | 12.099253 | 5.042971 | 40.571108 | O | 16.712277 | 3.345295 | 40.090198 |
| C  | 11.698221 | 3.178978 | 39.103109 | C | 16.966393 | 4.295140 | 39.265832 |
| C  | 10.356221 | 3.528983 | 39.024134 | C | 12.972270 | 5.800966 | 41.346096 |
| C  | 9.886237  | 4.637982 | 39.718146 | C | 12.500286 | 6.908965 | 42.040108 |
| O  | 9.453204  | 2.792989 | 38.218147 | C | 26.533421 | 7.057596 | 42.403616 |
| Cu | 17.241501 | 6.036945 | 41.546083 | C | 25.766348 | 6.116505 | 41.749316 |
| Cu | 16.615839 | 3.659841 | 42.056808 | C | 26.344264 | 4.963786 | 41.124995 |
| C  | 20.882005 | 3.859849 | 42.086796 | C | 27.772531 | 4.795193 | 41.237840 |
| C  | 21.338337 | 3.174692 | 43.227660 | C | 12.571237 | 3.934972 | 39.877096 |
| C  | 22.684318 | 2.861612 | 43.380907 | C | 27.612666 | 2.750519 | 39.929658 |
| C  | 23.599134 | 3.217649 | 42.394810 | C | 26.205987 | 2.910422 | 39.806734 |
| C  | 23.181620 | 3.873379 | 41.221634 | C | 25.565888 | 3.999642 | 40.389745 |
| C  | 21.803501 | 4.184743 | 41.054190 | O | 25.611122 | 1.914062 | 39.086308 |

|    |           |          |           |   |           |          |           |
|----|-----------|----------|-----------|---|-----------|----------|-----------|
| O  | 15.285141 | 6.385438 | 41.388429 | C | 32.721047 | 4.965344 | 38.041689 |
| O  | 14.725657 | 4.250481 | 41.846590 | C | 33.467221 | 3.850650 | 37.695292 |
| C  | 14.412868 | 5.454493 | 41.529824 | C | 33.599455 | 3.484383 | 36.340333 |
| C  | 16.627454 | 5.788161 | 45.760711 | C | 32.951727 | 4.203667 | 35.357165 |
| C  | 17.642660 | 6.538396 | 46.382440 | C | 32.142298 | 5.346404 | 35.660061 |
| C  | 18.817970 | 6.880438 | 32.225938 | C | 32.046142 | 5.741902 | 37.043999 |
| C  | 17.744556 | 6.406726 | 32.973664 | C | 31.233323 | 6.865717 | 37.374760 |
| C  | 16.721284 | 5.646829 | 32.374439 | C | 30.562004 | 7.559136 | 36.401687 |
| C  | 15.481144 | 5.407086 | 46.512151 | C | 30.651792 | 7.180210 | 35.035602 |
| C  | 14.386278 | 4.746924 | 45.915329 | C | 31.427649 | 6.088898 | 34.653367 |
| C  | 13.282441 | 4.373720 | 46.678102 | O | 29.924003 | 7.988404 | 34.208322 |
| C  | 14.589532 | 4.470455 | 32.504475 | O | 32.764563 | 6.499318 | 39.850571 |
| C  | 15.616346 | 5.187413 | 33.135249 | O | 32.449441 | 4.304020 | 40.272885 |
| O  | 13.501162 | 4.029488 | 33.249154 | C | 32.627551 | 5.289046 | 39.502721 |
| O  | 17.134179 | 6.356631 | 43.507081 | C | 28.541041 | 5.798795 | 41.914056 |
| O  | 16.557842 | 4.224184 | 43.963201 | C | 27.933560 | 6.914646 | 42.466287 |
| C  | 16.783951 | 5.434032 | 44.326317 | C | 42.205334 | 6.872666 | 42.214557 |
| Cu | 32.544664 | 7.264024 | 41.663507 | C | 41.399114 | 6.055545 | 41.428491 |
| Cu | 32.522556 | 4.342448 | 42.244788 | C | 41.955380 | 5.035491 | 40.630564 |
| C  | 36.545037 | 3.631734 | 41.767309 | C | 43.363604 | 4.830664 | 40.656886 |
| C  | 37.042673 | 2.760705 | 42.716594 | C | 28.373792 | 3.662259 | 40.614781 |
| C  | 38.416188 | 2.421868 | 42.715707 | C | 43.100904 | 3.053685 | 39.021144 |
| C  | 39.273905 | 2.963602 | 41.782677 | C | 41.727997 | 3.227796 | 39.005215 |
| C  | 38.802718 | 3.842361 | 40.752768 | C | 41.135261 | 4.226477 | 39.804362 |
| C  | 37.394387 | 4.139684 | 40.728007 | O | 40.992804 | 2.372784 | 38.189582 |
| C  | 36.887413 | 4.931877 | 39.658046 | O | 30.655887 | 6.799398 | 41.763502 |
| C  | 37.725712 | 5.458146 | 38.703617 | O | 30.579259 | 4.635766 | 42.334775 |
| C  | 39.128411 | 5.234507 | 38.765192 | C | 30.032407 | 5.727977 | 42.006917 |
| C  | 39.668822 | 4.427088 | 39.766501 | C | 32.450026 | 6.542046 | 45.856840 |
| O  | 39.945478 | 5.803709 | 37.835746 | C | 33.274217 | 7.436596 | 46.512533 |
| O  | 34.991822 | 5.409547 | 41.821988 | C | 34.764470 | 7.092153 | 32.127464 |
| O  | 34.220044 | 3.359834 | 42.228461 | C | 33.682863 | 6.747521 | 32.930425 |
| C  | 35.151227 | 4.173034 | 41.935613 | C | 32.607937 | 5.996993 | 32.417815 |

|    |           |          |           |   |           |          |           |
|----|-----------|----------|-----------|---|-----------|----------|-----------|
| C  | 31.382580 | 5.878036 | 46.547943 | C | 45.954006 | 6.594122 | 35.086552 |
| C  | 30.464531 | 5.015403 | 45.881153 | C | 46.812905 | 5.585569 | 34.592991 |
| C  | 29.430079 | 4.421018 | 46.562176 | O | 45.196222 | 7.419344 | 34.259178 |
| C  | 30.423302 | 4.956096 | 32.689268 | O | 48.435868 | 5.784696 | 39.665038 |
| C  | 31.494130 | 5.677631 | 33.230242 | O | 48.119434 | 3.591930 | 40.086744 |
| O  | 29.322051 | 4.659610 | 33.482073 | C | 48.269162 | 4.574157 | 39.274954 |
| O  | 32.787067 | 7.282447 | 43.638204 | C | 44.175600 | 5.648201 | 41.489799 |
| O  | 32.748948 | 5.062852 | 44.057839 | C | 43.579789 | 6.677772 | 42.239250 |
| C  | 32.679978 | 6.276433 | 44.398717 | C | 43.921017 | 3.840327 | 39.824565 |
| Cu | 48.396665 | 6.300381 | 41.583816 | O | 46.412793 | 6.459851 | 41.480703 |
| Cu | 48.016682 | 3.863616 | 42.057702 | O | 46.074919 | 4.265097 | 41.876932 |
| C  | 52.242278 | 4.464620 | 41.931334 | C | 45.641105 | 5.443950 | 41.616464 |
| C  | 52.828353 | 3.947597 | 43.079285 | C | 47.861159 | 5.935822 | 45.792557 |
| C  | 54.201353 | 3.732577 | 43.123183 | C | 48.824439 | 6.739398 | 46.429629 |
| C  | 54.987278 | 4.036581 | 42.018131 | C | 50.016371 | 7.174395 | 32.172478 |
| C  | 54.401203 | 4.554604 | 40.869180 | C | 48.967301 | 6.662746 | 32.930481 |
| C  | 53.028203 | 4.768624 | 40.826281 | C | 47.992051 | 5.828605 | 32.350455 |
| C  | 52.442128 | 5.287648 | 39.677330 | C | 46.725935 | 5.491793 | 46.524974 |
| C  | 53.229054 | 5.591652 | 38.571278 | C | 45.680930 | 4.770082 | 45.910581 |
| C  | 54.601054 | 5.377632 | 38.616177 | C | 44.583302 | 4.342631 | 46.653515 |
| C  | 55.187129 | 4.858609 | 39.764128 | C | 45.930286 | 4.536226 | 32.506076 |
| O  | 55.314970 | 5.617639 | 37.405129 | C | 46.911648 | 5.327656 | 33.120553 |
| O  | 50.338489 | 5.886306 | 41.720010 | O | 44.865389 | 4.053960 | 33.259086 |
| O  | 49.998209 | 3.702612 | 42.175703 | O | 48.299677 | 6.576451 | 43.548833 |
| C  | 50.772469 | 4.699939 | 41.949646 | O | 47.925684 | 4.392794 | 43.975672 |
| C  | 48.256208 | 4.297270 | 37.816198 | C | 48.044583 | 5.613345 | 44.355332 |
| C  | 49.051335 | 3.245871 | 37.325946 | C | 9.830848  | 7.260896 | 57.522290 |
| C  | 49.121660 | 2.982032 | 35.964015 | C | 8.959816  | 6.502907 | 56.749315 |
| C  | 48.396290 | 3.758355 | 35.066164 | C | 9.429783  | 5.394908 | 56.054291 |
| C  | 47.563980 | 4.805628 | 35.513446 | C | 10.771783 | 5.042898 | 56.134241 |
| C  | 47.478375 | 5.068312 | 36.908946 | C | 10.370718 | 3.178911 | 54.666243 |
| C  | 46.591133 | 6.066838 | 37.358690 | C | 9.028718  | 3.528920 | 54.587293 |
| C  | 45.851686 | 6.814648 | 36.449032 | C | 8.558750  | 4.637919 | 55.281317 |

|    |           |          |           |    |           |          |           |
|----|-----------|----------|-----------|----|-----------|----------|-----------|
| O  | 8.125684  | 2.792932 | 53.781319 | C  | 25.317185 | 7.079411 | 57.558387 |
| Cu | 15.892571 | 6.129113 | 57.135570 | C  | 24.479463 | 6.245554 | 56.825708 |
| Cu | 15.336776 | 3.718257 | 57.557746 | C  | 24.990069 | 5.137637 | 56.117911 |
| C  | 19.590647 | 4.027466 | 57.441808 | C  | 26.387662 | 4.874947 | 56.165058 |
| C  | 20.139638 | 3.263088 | 58.486987 | C  | 11.243751 | 3.934900 | 55.440217 |
| C  | 21.493968 | 2.949361 | 58.504205 | C  | 26.055805 | 3.009551 | 54.642730 |
| C  | 22.323244 | 3.384055 | 57.474489 | C  | 24.689322 | 3.227966 | 54.623157 |
| C  | 21.810178 | 4.126905 | 56.393467 | C  | 24.130456 | 4.296264 | 55.361240 |
| C  | 20.423547 | 4.439838 | 56.364746 | O  | 23.923249 | 2.340896 | 53.870891 |
| C  | 19.903904 | 5.119991 | 55.242836 | O  | 13.936631 | 6.427924 | 56.975039 |
| C  | 20.741511 | 5.515351 | 54.203052 | O  | 13.428930 | 4.268725 | 57.377123 |
| C  | 22.107119 | 5.248878 | 54.249066 | C  | 13.088397 | 5.472720 | 57.087646 |
| C  | 22.653514 | 4.546746 | 55.333291 | C  | 15.283046 | 5.695821 | 61.352095 |
| O  | 22.932301 | 5.650852 | 53.204605 | C  | 16.314087 | 6.385804 | 61.978046 |
| O  | 17.796243 | 5.583138 | 57.300418 | C  | 17.561855 | 6.869336 | 47.729617 |
| O  | 17.302248 | 3.413307 | 57.672312 | C  | 16.464285 | 6.463130 | 48.481202 |
| C  | 18.144614 | 4.361982 | 57.482272 | C  | 15.412745 | 5.732106 | 47.894850 |
| C  | 15.640629 | 4.204372 | 53.331730 | C  | 14.198081 | 5.242825 | 62.095148 |
| C  | 16.359339 | 3.106164 | 52.826302 | C  | 13.166040 | 4.552842 | 61.469196 |
| C  | 16.385778 | 2.839322 | 51.463603 | C  | 12.083075 | 4.099846 | 62.213249 |
| C  | 15.690899 | 3.659043 | 50.580626 | C  | 13.235852 | 4.644801 | 48.042867 |
| C  | 14.938121 | 4.758670 | 51.043648 | C  | 14.288800 | 5.333778 | 48.662236 |
| C  | 14.898697 | 5.026302 | 52.440115 | O  | 12.129439 | 4.262190 | 48.793123 |
| C  | 14.089462 | 6.081285 | 52.907184 | O  | 15.760635 | 6.374310 | 59.110960 |
| C  | 13.380728 | 6.875095 | 52.012272 | O  | 15.280820 | 4.203286 | 59.484350 |
| C  | 13.439659 | 6.648478 | 50.648152 | C  | 15.446887 | 5.407598 | 59.895730 |
| C  | 14.221054 | 5.586363 | 50.137745 | Cu | 31.474279 | 6.145566 | 57.138444 |
| O  | 12.723895 | 7.524711 | 49.836146 | Cu | 30.968633 | 3.721595 | 57.552473 |
| O  | 15.941089 | 5.642761 | 55.206557 | C  | 35.209866 | 4.088117 | 57.458246 |
| O  | 15.428636 | 3.478859 | 55.584991 | C  | 35.751466 | 3.365493 | 58.536839 |
| C  | 15.671739 | 4.457959 | 54.793441 | C  | 37.099113 | 3.026789 | 58.562870 |
| C  | 11.644816 | 5.800887 | 56.909216 | C  | 37.929344 | 3.392877 | 57.508334 |
| C  | 11.172849 | 6.908886 | 57.603240 | C  | 37.425467 | 4.098170 | 56.398084 |

|   |           |          |           |    |           |          |           |
|---|-----------|----------|-----------|----|-----------|----------|-----------|
| C | 36.045224 | 4.439937 | 56.362839 | O  | 39.557673 | 2.250684 | 53.855690 |
| C | 35.533711 | 5.086211 | 55.218408 | O  | 29.504281 | 6.409420 | 57.014829 |
| C | 36.373284 | 5.415849 | 54.157267 | O  | 29.054305 | 4.229716 | 57.376541 |
| C | 37.733557 | 5.120847 | 54.206962 | C  | 28.681571 | 5.430616 | 57.121563 |
| C | 38.272941 | 4.454988 | 55.317919 | C  | 30.903120 | 5.695641 | 61.351269 |
| O | 38.560338 | 5.461562 | 53.142280 | C  | 31.934175 | 6.385618 | 61.977205 |
| O | 33.394547 | 5.625351 | 57.276093 | C  | 33.106267 | 7.665079 | 47.897083 |
| O | 32.933425 | 3.452123 | 57.671139 | C  | 32.105506 | 7.025040 | 48.597334 |
| C | 33.761060 | 4.410980 | 57.475680 | C  | 31.196960 | 6.120747 | 47.955832 |
| C | 31.295403 | 4.234979 | 53.324925 | C  | 29.818167 | 5.242646 | 62.094340 |
| C | 32.099723 | 3.196107 | 52.823374 | C  | 28.786113 | 4.552669 | 61.468405 |
| C | 32.210205 | 2.979291 | 51.455247 | C  | 27.703159 | 4.099675 | 62.212476 |
| C | 31.515406 | 3.790221 | 50.563277 | C  | 29.256995 | 4.628794 | 47.956525 |
| C | 30.668499 | 4.819163 | 51.022636 | C  | 30.124504 | 5.467113 | 48.653993 |
| C | 30.543825 | 5.035507 | 52.422700 | O  | 28.236605 | 4.007268 | 48.611685 |
| C | 29.649337 | 6.023479 | 52.880369 | O  | 31.366724 | 6.380565 | 59.113218 |
| C | 28.932512 | 6.797924 | 51.973083 | O  | 30.904188 | 4.204541 | 59.481237 |
| C | 29.073818 | 6.620915 | 50.607737 | C  | 31.063894 | 5.409405 | 59.895328 |
| C | 29.945186 | 5.629581 | 50.113222 | Cu | 47.048987 | 6.244385 | 57.149430 |
| O | 28.339999 | 7.467450 | 49.782045 | Cu | 46.688733 | 3.789862 | 57.536779 |
| O | 31.507076 | 5.673086 | 55.206761 | C  | 50.914829 | 4.464394 | 57.493750 |
| O | 31.070215 | 3.490891 | 55.575542 | C  | 51.500923 | 3.947364 | 58.641689 |
| C | 31.285939 | 4.480646 | 54.788528 | C  | 52.873923 | 3.732339 | 58.685563 |
| C | 27.230218 | 5.704126 | 56.956354 | C  | 53.659830 | 4.036343 | 57.580498 |
| C | 26.678842 | 6.813601 | 57.622880 | C  | 53.073736 | 4.554373 | 56.431559 |
| C | 40.912483 | 6.945103 | 57.611651 | C  | 51.700736 | 4.768398 | 56.388685 |
| C | 40.085211 | 6.123855 | 56.855795 | C  | 51.114643 | 5.287428 | 55.239746 |
| C | 40.603974 | 5.025872 | 56.138085 | C  | 51.901549 | 5.591433 | 54.133681 |
| C | 42.002767 | 4.764716 | 56.193007 | C  | 53.273549 | 5.377407 | 54.178555 |
| C | 26.905259 | 3.816512 | 55.391698 | C  | 53.859642 | 4.858378 | 55.326493 |
| C | 41.683130 | 2.912886 | 54.652960 | O  | 53.987445 | 5.617415 | 52.967495 |
| C | 40.316577 | 3.133351 | 54.620195 | O  | 48.992472 | 5.856373 | 57.300794 |
| C | 39.750285 | 4.195721 | 55.361781 | O  | 48.676948 | 3.652321 | 57.668811 |

|   |           |          |           |   |           |          |           |
|---|-----------|----------|-----------|---|-----------|----------|-----------|
| C | 49.440179 | 4.670381 | 57.496804 | O | 46.577964 | 4.237028 | 59.466911 |
| C | 46.958343 | 4.348887 | 53.320600 | C | 46.674831 | 5.442384 | 59.893497 |
| C | 47.780011 | 3.327322 | 52.811093 | C | 16.262162 | 6.620790 | 63.347051 |
| C | 47.825382 | 3.063216 | 51.448779 | C | 15.179196 | 6.168795 | 64.090104 |
| C | 47.048804 | 3.809935 | 50.569659 | C | 14.147156 | 5.478812 | 63.465153 |
| C | 46.197873 | 4.834553 | 51.035646 | C | 12.031150 | 4.336833 | 63.582254 |
| C | 46.138101 | 5.096709 | 52.432497 | C | 13.063191 | 5.025817 | 64.207206 |
| C | 45.233668 | 6.069166 | 52.903219 | O | 10.943187 | 3.908837 | 64.361307 |
| C | 44.449602 | 6.792455 | 52.011117 | C | 31.882275 | 6.620600 | 63.346211 |
| C | 44.526507 | 6.574953 | 50.646234 | C | 30.799322 | 6.168606 | 64.089282 |
| C | 45.404706 | 5.592876 | 50.131766 | C | 29.767267 | 5.478629 | 63.464346 |
| O | 43.732712 | 7.384708 | 49.837444 | C | 27.651260 | 4.336658 | 63.581482 |
| O | 47.119184 | 5.792284 | 55.211222 | C | 28.683314 | 5.025635 | 64.206417 |
| O | 46.811675 | 3.585518 | 55.563773 | O | 26.563309 | 3.908663 | 64.360554 |
| C | 46.962128 | 4.591992 | 54.784206 | C | 47.502389 | 6.620356 | 63.345091 |
| C | 42.838408 | 5.593344 | 56.992114 | C | 46.419447 | 6.168363 | 64.088179 |
| C | 42.274027 | 6.685354 | 57.678079 | C | 45.387379 | 5.478391 | 63.463260 |
| C | 42.526894 | 3.713060 | 55.416331 | C | 43.271369 | 4.336426 | 63.580429 |
| O | 45.073265 | 6.391576 | 57.021074 | C | 44.303437 | 5.025398 | 64.205349 |
| O | 44.740521 | 4.186605 | 57.355219 | O | 42.183431 | 3.908432 | 64.359519 |
| C | 44.303101 | 5.371693 | 57.122718 | H | 12.119370 | 8.127103 | 26.935477 |
| C | 46.523195 | 5.695406 | 61.350162 | H | 10.572727 | 6.787268 | 25.566452 |
| C | 47.554262 | 6.385378 | 61.976082 | H | 13.377754 | 2.322876 | 22.980214 |
| C | 48.702647 | 7.067445 | 47.774274 | H | 9.846122  | 3.167855 | 22.675435 |
| C | 47.614518 | 6.605435 | 48.507003 | H | 22.102474 | 2.821734 | 28.228025 |
| C | 46.615308 | 5.815505 | 47.905011 | H | 24.504043 | 2.292665 | 28.300132 |
| C | 45.438253 | 5.242413 | 62.093251 | H | 26.009213 | 3.104639 | 26.555995 |
| C | 44.406185 | 4.552442 | 61.467332 | H | 21.519485 | 5.291053 | 24.085747 |
| C | 43.323243 | 4.099449 | 62.211421 | H | 23.030247 | 6.048983 | 22.359269 |
| C | 44.497768 | 4.612753 | 48.016762 | H | 19.532148 | 2.329264 | 22.590171 |
| C | 45.502294 | 5.356012 | 48.654391 | H | 19.679021 | 1.794023 | 20.190610 |
| O | 43.398305 | 4.175656 | 48.746884 | H | 18.480548 | 3.170353 | 18.536430 |
| O | 46.917668 | 6.441386 | 59.125117 | H | 16.650249 | 6.140419 | 22.827024 |



|   |           |          |           |   |           |          |           |
|---|-----------|----------|-----------|---|-----------|----------|-----------|
| H | 15.505628 | 7.501824 | 21.158911 | H | 53.552148 | 3.699851 | 28.381689 |
| H | 14.495782 | 7.508469 | 27.087682 | H | 55.987724 | 3.326094 | 28.455521 |
| H | 27.618183 | 8.056914 | 26.952720 | H | 57.384426 | 3.866088 | 26.498127 |
| H | 26.117482 | 6.545711 | 25.764969 | H | 52.704036 | 5.448100 | 24.015384 |
| H | 14.941677 | 3.638871 | 24.310055 | H | 54.083195 | 5.976006 | 22.116677 |
| H | 29.108464 | 2.114211 | 23.204351 | H | 50.778385 | 2.335037 | 22.589416 |
| H | 19.756287 | 6.952473 | 30.305618 | H | 50.920987 | 1.795422 | 20.189901 |
| H | 15.698463 | 4.474061 | 29.310672 | H | 49.720850 | 3.170558 | 18.535633 |
| H | 13.836722 | 3.701636 | 30.644881 | H | 47.862913 | 6.130289 | 22.823632 |
| H | 15.670377 | 6.862986 | 17.594960 | H | 46.740238 | 7.497712 | 21.158846 |
| H | 25.169504 | 6.227671 | 21.560124 | H | 45.533270 | 7.339930 | 27.143323 |
| H | 25.594119 | 2.493335 | 23.030786 | H | 46.271551 | 3.373026 | 24.442585 |
| H | 37.753609 | 3.008177 | 28.303520 | H | 50.956491 | 7.246041 | 30.251969 |
| H | 40.135207 | 2.400661 | 28.377825 | H | 47.062109 | 4.500907 | 29.320220 |
| H | 41.626244 | 2.994563 | 26.538326 | H | 45.234801 | 3.669170 | 30.667358 |
| H | 37.168790 | 5.166703 | 23.996965 | H | 46.912735 | 6.863905 | 17.594429 |
| H | 38.666968 | 5.706887 | 22.173891 | H | 56.063092 | 5.977865 | 21.099171 |
| H | 35.151422 | 2.330072 | 22.590899 | H | 10.790899 | 8.127462 | 42.499104 |
| H | 35.298699 | 1.793815 | 20.190412 | H | 9.244091  | 6.787402 | 41.130360 |
| H | 34.100181 | 3.170182 | 18.536189 | H | 12.049826 | 2.325142 | 38.541278 |
| H | 32.261822 | 6.137874 | 22.825956 | H | 8.517974  | 3.169198 | 38.238704 |
| H | 31.123245 | 7.500060 | 21.159045 | H | 20.640888 | 2.898646 | 44.011522 |
| H | 30.028761 | 7.587662 | 27.075446 | H | 23.023271 | 2.344811 | 44.272902 |
| H | 43.119565 | 7.763134 | 26.982939 | H | 24.640620 | 2.962839 | 42.549125 |
| H | 41.681012 | 6.270420 | 25.708440 | H | 20.339150 | 5.000813 | 39.652300 |
| H | 30.634321 | 3.583016 | 24.399260 | H | 21.959578 | 5.530938 | 37.929141 |
| H | 44.798925 | 1.912701 | 23.168287 | H | 18.138062 | 2.239313 | 37.986620 |
| H | 35.645955 | 6.979279 | 30.183997 | H | 18.179153 | 1.771996 | 35.571806 |
| H | 31.478944 | 4.575232 | 29.498659 | H | 17.010888 | 3.230430 | 34.005029 |
| H | 29.606512 | 4.032809 | 30.929808 | H | 15.266442 | 6.122985 | 38.436023 |
| H | 31.291248 | 6.863217 | 17.594900 | H | 14.084172 | 7.533922 | 36.845217 |
| H | 40.796501 | 5.750651 | 21.329269 | H | 13.169252 | 7.508328 | 42.649159 |
| H | 41.288726 | 2.263069 | 22.885737 | H | 26.054240 | 7.927751 | 42.863351 |

|   |           |          |           |   |           |          |           |
|---|-----------|----------|-----------|---|-----------|----------|-----------|
| H | 24.684361 | 6.277134 | 41.708001 | H | 29.960940 | 7.710102 | 33.280328 |
| H | 13.612641 | 3.640435 | 39.863317 | H | 39.416184 | 6.294644 | 37.186283 |
| H | 28.068624 | 1.883439 | 39.444305 | H | 39.997555 | 2.532695 | 38.235350 |
| H | 18.509178 | 6.858050 | 45.813242 | H | 52.223642 | 3.704278 | 43.946438 |
| H | 19.589194 | 7.476647 | 32.702581 | H | 54.659165 | 3.326852 | 44.019235 |
| H | 17.710857 | 6.652999 | 34.026775 | H | 56.055723 | 3.866048 | 42.061517 |
| H | 14.358603 | 4.524213 | 44.855267 | H | 51.375279 | 5.450197 | 39.581159 |
| H | 12.458986 | 3.863865 | 46.198051 | H | 52.754484 | 5.976134 | 37.680116 |
| H | 12.840750 | 3.500867 | 32.698673 | H | 49.632256 | 2.637188 | 38.010803 |
| H | 14.128624 | 7.157653 | 33.326865 | H | 49.745884 | 2.172618 | 35.599941 |
| H | 24.146979 | 5.599568 | 37.242811 | H | 48.478342 | 3.521114 | 34.014661 |
| H | 24.655327 | 2.044177 | 38.986345 | H | 46.443070 | 6.274365 | 38.411344 |
| H | 36.371321 | 2.372686 | 43.487306 | H | 45.177068 | 7.584170 | 36.798443 |
| H | 38.805577 | 1.743596 | 43.481554 | H | 44.191222 | 7.320358 | 42.863983 |
| H | 40.336777 | 2.707456 | 41.831309 | H | 44.989987 | 3.668214 | 39.773240 |
| H | 35.815604 | 5.121802 | 39.586035 | H | 49.679106 | 7.108693 | 45.872720 |
| H | 37.310035 | 6.055390 | 37.883102 | H | 50.750262 | 7.827026 | 32.633846 |
| H | 33.944307 | 3.262554 | 38.483479 | H | 48.913766 | 6.937014 | 33.975833 |
| H | 34.205188 | 2.613818 | 36.069245 | H | 45.688679 | 4.538701 | 44.852005 |
| H | 33.061938 | 3.872062 | 34.319743 | H | 43.796488 | 3.789414 | 46.159993 |
| H | 31.142402 | 7.175639 | 38.415499 | H | 44.241647 | 3.469443 | 32.722654 |
| H | 29.931061 | 8.417059 | 36.649513 | H | 45.305348 | 7.205576 | 33.282013 |
| H | 28.550220 | 7.676128 | 42.949872 | H | 54.733421 | 5.973037 | 36.660950 |
| H | 41.762734 | 7.658933 | 42.814879 | H | 9.463506  | 8.126829 | 58.063134 |
| H | 40.332825 | 6.232831 | 41.443582 | H | 7.916605  | 6.787083 | 56.694063 |
| H | 29.453241 | 3.522154 | 40.676701 | H | 10.722410 | 2.324956 | 54.104727 |
| H | 43.532240 | 2.289896 | 38.387653 | H | 7.190376  | 3.168797 | 53.802850 |
| H | 34.062606 | 7.949857 | 45.954894 | H | 19.507729 | 2.919434 | 59.299049 |
| H | 35.578163 | 7.681075 | 32.538197 | H | 21.905318 | 2.366467 | 59.321703 |
| H | 33.685938 | 7.085654 | 33.959240 | H | 23.371960 | 3.121702 | 57.520799 |
| H | 30.573044 | 4.816173 | 44.814977 | H | 18.847866 | 5.342427 | 55.145215 |
| H | 28.730295 | 3.770235 | 46.024332 | H | 20.319110 | 6.038024 | 53.356380 |
| H | 28.639167 | 4.087164 | 33.007570 | H | 16.908211 | 2.457548 | 53.500662 |

|   |           |          |           |   |           |          |           |
|---|-----------|----------|-----------|---|-----------|----------|-----------|
| H | 16.947931 | 1.990822 | 51.087584 | H | 32.788421 | 6.739923 | 61.409690 |
| H | 15.732494 | 3.414271 | 49.528554 | H | 33.775067 | 8.358457 | 48.417075 |
| H | 13.980761 | 6.300379 | 53.962388 | H | 32.001760 | 7.228669 | 49.667866 |
| H | 12.766892 | 7.688281 | 52.374810 | H | 28.749314 | 4.379529 | 60.400407 |
| H | 11.840497 | 7.509056 | 58.213286 | H | 26.897626 | 3.574621 | 61.720244 |
| H | 24.905777 | 7.934179 | 58.085088 | H | 27.739004 | 3.452013 | 47.989473 |
| H | 23.425585 | 6.485198 | 56.802431 | H | 28.479278 | 7.284617 | 48.799238 |
| H | 12.285084 | 3.640674 | 55.426536 | H | 38.073877 | 5.967243 | 52.416946 |
| H | 26.456873 | 2.194068 | 54.056523 | H | 38.575402 | 2.467686 | 53.862477 |
| H | 17.168825 | 6.739444 | 61.410817 | H | 50.895049 | 3.699562 | 59.506766 |
| H | 18.356642 | 7.441993 | 48.196360 | H | 53.331422 | 3.325561 | 59.581254 |
| H | 16.435669 | 6.738015 | 49.527246 | H | 54.728193 | 3.865562 | 57.623768 |
| H | 13.128508 | 4.380832 | 60.401068 | H | 50.048142 | 5.455201 | 55.146464 |
| H | 11.277598 | 3.574663 | 61.721067 | H | 51.426938 | 5.977204 | 53.243093 |
| H | 11.453286 | 3.742541 | 48.253335 | H | 48.392173 | 2.734790 | 53.482802 |
| H | 12.794754 | 7.302849 | 48.857450 | H | 48.464937 | 2.272584 | 51.070408 |
| H | 22.438971 | 6.174215 | 52.496703 | H | 47.106609 | 3.566435 | 49.518236 |
| H | 22.941328 | 2.559820 | 53.882015 | H | 45.108848 | 6.276190 | 53.959179 |
| H | 35.116591 | 3.066232 | 59.364051 | H | 43.761295 | 7.542138 | 52.376858 |
| H | 37.503289 | 2.473202 | 59.403970 | H | 42.902941 | 7.338242 | 58.274127 |
| H | 38.971600 | 3.107165 | 57.559593 | H | 43.588195 | 3.501968 | 55.373732 |
| H | 34.483020 | 5.334704 | 55.122664 | H | 48.406274 | 6.744633 | 61.408085 |
| H | 35.957353 | 5.912580 | 53.291892 | H | 49.455858 | 7.684667 | 48.252912 |
| H | 32.659413 | 2.563509 | 53.504071 | H | 47.550999 | 6.883618 | 49.550597 |
| H | 32.843585 | 2.181437 | 51.081393 | H | 44.382077 | 4.368277 | 60.399975 |
| H | 31.631070 | 3.593129 | 49.505157 | H | 42.519429 | 3.571442 | 61.719562 |
| H | 29.480882 | 6.200760 | 53.936406 | H | 42.760239 | 3.619636 | 48.196860 |
| H | 28.248067 | 7.557075 | 52.327597 | H | 43.817511 | 7.167534 | 48.859142 |
| H | 27.314604 | 7.466896 | 58.211005 | H | 53.405536 | 5.972351 | 52.223367 |
| H | 40.494279 | 7.790324 | 58.148336 | H | 17.068094 | 7.157953 | 63.835986 |
| H | 39.032387 | 6.365988 | 56.824472 | H | 15.148345 | 6.357534 | 65.155915 |
| H | 27.966437 | 3.606819 | 55.338434 | H | 10.258596 | 3.420391 | 63.803975 |
| H | 42.089228 | 2.101518 | 54.064583 | H | 32.688052 | 7.158042 | 63.835068 |

|   |           |           |           |            |           |           |           |
|---|-----------|-----------|-----------|------------|-----------|-----------|-----------|
| H | 30.768378 | 6.357485  | 65.155053 | H          | 35.091866 | 7.556366  | 42.817679 |
| H | 25.877478 | 3.422597  | 63.802684 | H          | 34.843569 | 11.133888 | 40.713960 |
| H | 48.307555 | 7.158926  | 63.833660 | H          | 36.353253 | 11.399402 | 39.812276 |
| H | 46.388350 | 6.357497  | 65.153875 | H          | 37.628829 | 10.138744 | 41.585870 |
| H | 41.497299 | 3.423012  | 63.801422 | H          | 36.799697 | 11.548508 | 42.272296 |
| H | 54.923364 | 4.683318  | 55.324879 | H          | 35.011557 | 10.138270 | 43.216757 |
| H | 56.250908 | 4.683600  | 39.762528 | H          | 36.549039 | 9.395563  | 43.668755 |
| H | 57.579678 | 4.683861  | 24.199224 | H          | 36.632939 | 8.951492  | 39.471710 |
| H | 32.653505 | 5.044465  | 18.025502 | H          | 39.430309 | 8.527851  | 43.016460 |
| H | 17.033768 | 5.044633  | 18.025670 | H          | 40.380462 | 8.462576  | 45.318211 |
| H | 10.175615 | 4.914249  | 24.088542 | H          | 39.357445 | 6.986405  | 47.058975 |
| H | 8.847003  | 4.914442  | 39.652550 | H          | 37.372878 | 5.578944  | 46.465364 |
| H | 7.519560  | 4.914412  | 55.215976 | H          | 36.446080 | 5.624910  | 44.157474 |
| H | 12.997579 | 5.198435  | 65.269740 | H          | 37.952290 | 7.400505  | 41.403756 |
| H | 28.617624 | 5.198373  | 65.268908 | H          | 36.720217 | 6.343484  | 41.900708 |
| H | 44.237735 | 5.198152  | 65.267813 |            |           |           |           |
| H | 48.273515 | 5.044295  | 18.025049 |            |           |           |           |
| C | 35.444293 | 8.362606  | 42.178029 | (R,R)-2-RC |           |           |           |
| C | 35.054329 | 8.303079  | 40.761200 | C          | 12.487000 | 7.261000  | 26.395000 |
| C | 35.654774 | 9.338588  | 39.821898 | C          | 11.616000 | 6.503000  | 25.622000 |
| C | 35.838474 | 10.703514 | 40.498368 | C          | 12.086000 | 5.395000  | 24.927000 |
| C | 36.628266 | 10.561451 | 41.807946 | C          | 13.428000 | 5.043000  | 25.007000 |
| C | 35.907810 | 9.640745  | 42.803485 | C          | 13.027000 | 3.179000  | 23.539000 |
| O | 33.811435 | 8.689173  | 41.317916 | C          | 11.685000 | 3.529000  | 23.460000 |
| C | 37.895022 | 7.061527  | 43.433889 | C          | 11.215000 | 4.638000  | 24.154000 |
| C | 38.994145 | 7.868521  | 43.775285 | O          | 10.782000 | 2.793000  | 22.654000 |
| C | 39.518880 | 7.833953  | 45.069541 | Cu         | 18.543436 | 6.084805  | 26.013443 |
| C | 38.945901 | 7.010323  | 46.045434 | Cu         | 17.946107 | 3.697792  | 26.528166 |
| C | 37.836423 | 6.223214  | 45.711322 | C          | 22.207131 | 3.939446  | 26.373350 |
| C | 37.309458 | 6.243448  | 44.418383 | C          | 22.750745 | 3.181819  | 27.426208 |
| N | 37.320125 | 7.137583  | 42.157692 | C          | 24.102685 | 2.863274  | 27.451108 |
| H | 35.000331 | 9.413246  | 38.935267 | C          | 24.935196 | 3.290294  | 26.421893 |
| H | 35.034046 | 7.299314  | 40.313730 | C          | 24.428234 | 4.024842  | 25.332608 |
|   |           |           |           | C          | 23.043407 | 4.335953  | 25.292337 |

|   |           |          |           |    |           |          |           |
|---|-----------|----------|-----------|----|-----------|----------|-----------|
| C | 22.526771 | 5.001037 | 24.159562 | O  | 16.596342 | 6.403264 | 25.847219 |
| C | 23.369981 | 5.389126 | 23.123287 | O  | 16.053413 | 4.265038 | 26.319646 |
| C | 24.736466 | 5.129540 | 23.183135 | C  | 15.735398 | 5.462569 | 25.983475 |
| C | 25.276748 | 4.437917 | 24.275765 | C  | 17.902375 | 5.826218 | 30.223994 |
| O | 25.567939 | 5.524534 | 22.140947 | C  | 18.892535 | 6.587126 | 30.871568 |
| O | 20.432955 | 5.514509 | 26.188006 | C  | 16.745304 | 5.422980 | 30.947109 |
| O | 19.906511 | 3.369280 | 26.650012 | C  | 15.671461 | 4.756402 | 30.318978 |
| C | 20.763546 | 4.295868 | 26.415403 | C  | 14.559884 | 4.358957 | 31.055653 |
| C | 18.226927 | 4.022014 | 22.293999 | O  | 18.430525 | 6.404695 | 27.972755 |
| C | 18.992915 | 2.941012 | 21.873981 | O  | 17.894331 | 4.260719 | 28.429047 |
| C | 19.081890 | 2.638017 | 20.519979 | C  | 18.093368 | 5.475700 | 28.791378 |
| C | 18.404876 | 3.417024 | 19.587993 | Cu | 34.092656 | 5.990628 | 26.097501 |
| C | 17.639888 | 4.497025 | 20.008011 | Cu | 33.543847 | 3.581651 | 26.546007 |
| C | 17.550017 | 4.800019 | 21.362013 | C  | 37.800760 | 3.886650 | 26.434447 |
| C | 16.783924 | 5.881020 | 21.784030 | C  | 38.323963 | 3.139277 | 27.505531 |
| C | 16.107910 | 6.659026 | 20.850045 | C  | 39.673247 | 2.814053 | 27.558137 |
| C | 16.197885 | 6.355032 | 19.497042 | C  | 40.524388 | 3.218994 | 26.536008 |
| C | 16.963876 | 5.274031 | 19.076025 | C  | 40.040464 | 3.943405 | 25.430121 |
| O | 15.523872 | 7.185038 | 18.539057 | C  | 38.659011 | 4.271305 | 25.366949 |
| O | 18.565823 | 5.527821 | 24.111054 | C  | 38.167912 | 4.939359 | 24.225872 |
| O | 18.017878 | 3.388039 | 24.573350 | C  | 39.030750 | 5.303324 | 23.196503 |
| C | 18.263378 | 4.335537 | 23.745083 | C  | 40.392246 | 5.018428 | 23.273573 |
| C | 14.301000 | 5.801000 | 25.782000 | C  | 40.909472 | 4.330425 | 24.379978 |
| C | 13.829000 | 6.909000 | 26.476000 | O  | 41.241891 | 5.388756 | 22.236984 |
| C | 27.928247 | 6.998486 | 26.482974 | O  | 36.000575 | 5.441752 | 26.228960 |
| C | 27.095466 | 6.156473 | 25.754705 | O  | 35.506918 | 3.281208 | 26.651787 |
| C | 27.608111 | 5.038435 | 25.064532 | C  | 36.350800 | 4.224954 | 26.443216 |
| C | 29.002341 | 4.772680 | 25.125469 | C  | 33.846855 | 4.021974 | 22.293721 |
| C | 13.900000 | 3.935000 | 24.313000 | C  | 34.612832 | 2.940971 | 21.873686 |
| C | 28.681730 | 2.891464 | 23.623522 | C  | 34.701783 | 2.637980 | 20.519681 |
| C | 27.315032 | 3.111346 | 23.592494 | C  | 34.024755 | 3.416991 | 19.587710 |
| C | 26.753329 | 4.188862 | 24.313815 | C  | 33.259777 | 4.496993 | 20.007743 |
| O | 26.550591 | 2.217255 | 22.845818 | C  | 33.170827 | 4.799985 | 21.361749 |

|    |           |          |           |   |           |          |           |
|----|-----------|----------|-----------|---|-----------|----------|-----------|
| C  | 32.403849 | 5.880988 | 21.783783 | C | 54.157059 | 3.947781 | 27.515908 |
| C  | 31.727822 | 6.658998 | 20.849812 | C | 55.530060 | 3.732767 | 27.559832 |
| C  | 31.817772 | 6.355006 | 19.496807 | C | 56.316003 | 4.036770 | 26.454793 |
| C  | 32.583750 | 5.274004 | 19.075773 | C | 55.729947 | 4.554788 | 25.305829 |
| O  | 31.143744 | 7.185017 | 18.538837 | C | 54.356948 | 4.768802 | 25.262905 |
| O  | 34.105898 | 5.497417 | 24.167795 | C | 53.770890 | 5.287820 | 24.113942 |
| O  | 33.615560 | 3.334182 | 24.570245 | C | 54.557834 | 5.591822 | 23.007903 |
| C  | 33.845604 | 4.306591 | 23.763258 | C | 55.929834 | 5.377808 | 23.052827 |
| C  | 29.839642 | 5.607422 | 25.916266 | C | 56.515890 | 4.858790 | 24.200790 |
| C  | 29.287283 | 6.727681 | 26.562917 | O | 56.643771 | 5.617813 | 21.841791 |
| C  | 43.550271 | 6.896540 | 26.586867 | O | 51.637646 | 5.837991 | 26.120883 |
| C  | 42.720612 | 6.039220 | 25.875182 | O | 51.334207 | 3.662036 | 26.636203 |
| C  | 43.239211 | 4.923049 | 25.186727 | C | 52.092790 | 4.667279 | 26.380273 |
| C  | 44.638190 | 4.671101 | 25.236987 | C | 49.466780 | 4.021882 | 22.293161 |
| C  | 29.525737 | 3.704713 | 24.368909 | C | 50.232747 | 2.940878 | 21.873109 |
| C  | 44.316841 | 2.758408 | 23.777380 | C | 50.321671 | 2.637891 | 20.519101 |
| C  | 42.949483 | 2.979485 | 23.737966 | C | 49.644629 | 3.416907 | 19.587145 |
| C  | 42.385189 | 4.066573 | 24.442721 | C | 48.879663 | 4.496911 | 20.007197 |
| O  | 42.186898 | 2.077597 | 22.998875 | C | 48.790739 | 4.799899 | 21.361205 |
| O  | 32.126732 | 6.286133 | 25.981645 | C | 48.023773 | 5.880903 | 21.783256 |
| O  | 31.641701 | 4.119836 | 26.379716 | C | 47.347732 | 6.658919 | 20.849300 |
| C  | 31.288136 | 5.321677 | 26.101865 | C | 47.437657 | 6.354932 | 19.496292 |
| C  | 33.562581 | 5.590818 | 30.325269 | C | 48.203622 | 5.273928 | 19.075240 |
| C  | 34.586691 | 6.319230 | 30.958084 | O | 46.763615 | 7.184949 | 18.538336 |
| C  | 32.420486 | 5.197687 | 31.080376 | O | 49.731242 | 5.591586 | 24.088742 |
| C  | 31.326105 | 4.541203 | 30.480297 | O | 49.385064 | 3.426484 | 24.608743 |
| C  | 30.218692 | 4.178906 | 31.242170 | C | 49.525274 | 4.368945 | 23.749559 |
| O  | 34.009067 | 6.242306 | 28.073044 | C | 45.478031 | 5.539904 | 25.986921 |
| O  | 33.496921 | 4.082036 | 28.472087 | C | 44.915028 | 6.653240 | 26.637668 |
| C  | 33.700559 | 5.285250 | 28.871443 | C | 45.161977 | 3.587703 | 24.505092 |
| Cu | 49.695781 | 6.207181 | 25.981277 | O | 47.715720 | 6.340173 | 25.884775 |
| Cu | 49.343761 | 3.790233 | 26.564306 | O | 47.393477 | 4.172750 | 26.419204 |
| C  | 53.571004 | 4.464799 | 26.367945 | C | 46.948604 | 5.334250 | 26.097989 |

|    |           |          |           |   |           |          |           |
|----|-----------|----------|-----------|---|-----------|----------|-----------|
| C  | 49.205884 | 5.999653 | 30.215095 | C | 17.590367 | 3.037663 | 37.209212 |
| C  | 50.152497 | 6.843404 | 30.823881 | C | 17.596874 | 2.766955 | 35.847835 |
| C  | 48.095336 | 5.533565 | 30.972590 | C | 16.894726 | 3.590057 | 34.974459 |
| C  | 47.063362 | 4.772110 | 30.384013 | C | 16.146408 | 4.688895 | 35.446402 |
| C  | 45.993283 | 4.322214 | 31.151186 | C | 16.118586 | 4.952860 | 36.841345 |
| O  | 49.608513 | 6.569455 | 27.935238 | C | 15.305812 | 5.999342 | 37.321551 |
| O  | 49.296665 | 4.395920 | 28.455237 | C | 14.583692 | 6.790236 | 36.437014 |
| C  | 49.388614 | 5.633100 | 28.784771 | C | 14.638902 | 6.573835 | 35.070237 |
| C  | 11.158284 | 7.260965 | 41.959133 | C | 15.427414 | 5.522661 | 34.549843 |
| C  | 10.287267 | 6.502972 | 41.186144 | O | 13.914380 | 7.449877 | 34.264871 |
| C  | 10.757252 | 5.394972 | 40.491132 | O | 17.230064 | 5.617095 | 39.555659 |
| C  | 12.099252 | 5.042967 | 40.571107 | O | 16.748081 | 3.458572 | 40.001404 |
| C  | 11.698220 | 3.178974 | 39.103108 | C | 16.959574 | 4.420216 | 39.178876 |
| C  | 10.356220 | 3.528979 | 39.024133 | C | 12.972269 | 5.800962 | 41.346096 |
| C  | 9.886236  | 4.637978 | 39.718145 | C | 12.500284 | 6.908961 | 42.040108 |
| O  | 9.453203  | 2.792985 | 38.218146 | C | 26.684752 | 7.068801 | 42.312817 |
| Cu | 17.233239 | 6.153749 | 41.467023 | C | 25.867293 | 6.289980 | 41.519705 |
| Cu | 16.692489 | 3.752870 | 41.967575 | C | 26.375937 | 5.197368 | 40.743341 |
| C  | 20.956380 | 4.082772 | 41.826761 | C | 27.789637 | 4.934149 | 40.826066 |
| C  | 21.479081 | 3.326417 | 42.891548 | C | 12.571236 | 3.934968 | 39.877095 |
| C  | 22.832877 | 3.022660 | 42.956276 | C | 27.535341 | 3.120234 | 39.228602 |
| C  | 23.691270 | 3.460103 | 41.953797 | C | 26.135957 | 3.357737 | 39.151571 |
| C  | 23.211811 | 4.197274 | 40.855346 | C | 25.547345 | 4.375114 | 39.899060 |
| C  | 21.824410 | 4.500278 | 40.777497 | O | 25.493171 | 2.494882 | 38.310525 |
| C  | 21.338613 | 5.175888 | 39.638765 | O | 15.269282 | 6.440147 | 41.352713 |
| C  | 22.211452 | 5.571651 | 38.629335 | O | 14.778878 | 4.286845 | 41.805654 |
| C  | 23.576051 | 5.311696 | 38.723438 | C | 14.425678 | 5.484502 | 41.503139 |
| C  | 24.086739 | 4.620341 | 39.827096 | C | 16.713324 | 5.841907 | 45.695717 |
| O  | 24.431585 | 5.707130 | 37.703090 | C | 17.716063 | 6.613456 | 46.311376 |
| O  | 19.142999 | 5.618941 | 41.598692 | C | 18.781304 | 6.903267 | 32.219181 |
| O  | 18.662269 | 3.464140 | 42.061692 | C | 17.677331 | 6.468474 | 32.944032 |
| C  | 19.501338 | 4.408619 | 41.831986 | C | 16.648206 | 5.728081 | 32.330248 |
| C  | 16.881409 | 4.138507 | 37.721879 | C | 15.588299 | 5.421769 | 46.459920 |

|    |           |          |           |   |           |          |           |
|----|-----------|----------|-----------|---|-----------|----------|-----------|
| C  | 14.507438 | 4.731311 | 45.871751 | C | 31.136189 | 5.405067 | 34.680245 |
| C  | 13.423996 | 4.326512 | 46.645422 | O | 29.773539 | 7.434783 | 34.389133 |
| C  | 14.486992 | 4.608061 | 32.423671 | O | 32.786413 | 5.463153 | 39.711776 |
| C  | 15.518704 | 5.300928 | 33.071185 | O | 32.181902 | 3.364168 | 40.249706 |
| O  | 13.372282 | 4.201754 | 33.148588 | C | 32.439299 | 4.282950 | 39.417025 |
| O  | 17.159031 | 6.450622 | 43.433320 | C | 28.606679 | 5.762473 | 41.659837 |
| O  | 16.662321 | 4.295640 | 43.878550 | C | 28.071702 | 6.815201 | 42.380840 |
| C  | 16.857284 | 5.508540 | 44.251182 | C | 42.295393 | 7.232720 | 42.158116 |
| Cu | 32.876873 | 6.271331 | 41.544288 | C | 41.455484 | 6.431117 | 41.394305 |
| Cu | 32.328455 | 3.796075 | 42.176453 | C | 41.962071 | 5.356802 | 40.636650 |
| C  | 36.508666 | 4.025501 | 41.807601 | C | 43.357137 | 5.082254 | 40.675525 |
| C  | 37.005196 | 3.153221 | 42.759563 | C | 28.337598 | 3.876788 | 40.042658 |
| C  | 38.382017 | 2.842239 | 42.786056 | C | 43.010326 | 3.266795 | 39.102380 |
| C  | 39.239278 | 3.382733 | 41.851894 | C | 41.646354 | 3.507424 | 39.077729 |
| C  | 38.771940 | 4.260050 | 40.819607 | C | 41.103372 | 4.559765 | 39.841045 |
| C  | 37.366521 | 4.583411 | 40.801832 | O | 40.867908 | 2.659805 | 38.294298 |
| C  | 36.877211 | 5.416093 | 39.754532 | O | 30.858559 | 6.455118 | 41.474383 |
| C  | 37.724548 | 5.914975 | 38.794249 | O | 30.433954 | 4.354628 | 42.157350 |
| C  | 39.116354 | 5.632108 | 38.825017 | C | 30.074275 | 5.502827 | 41.771640 |
| C  | 39.644011 | 4.810665 | 39.819531 | C | 32.271732 | 6.061439 | 45.738783 |
| O  | 39.935688 | 6.163060 | 37.875159 | C | 33.137188 | 6.975467 | 46.312448 |
| O  | 34.730855 | 5.581134 | 41.711293 | C | 34.519867 | 6.619751 | 32.312799 |
| O  | 34.251934 | 3.419380 | 42.122542 | C | 33.420897 | 6.212867 | 33.061084 |
| C  | 35.053244 | 4.370770 | 41.879371 | C | 32.357585 | 5.508311 | 32.467443 |
| C  | 32.362735 | 3.944990 | 37.961756 | C | 31.175969 | 5.513652 | 46.485239 |
| C  | 32.993969 | 2.789627 | 37.536498 | C | 30.198457 | 4.661515 | 45.894997 |
| C  | 33.057018 | 2.493295 | 36.158069 | C | 29.152089 | 4.168739 | 46.637028 |
| C  | 32.478352 | 3.337537 | 35.233049 | C | 30.167439 | 4.458341 | 32.605396 |
| C  | 31.774862 | 4.523574 | 35.623301 | C | 31.226087 | 5.128478 | 33.226619 |
| C  | 31.710858 | 4.818417 | 37.031500 | O | 29.049973 | 4.100164 | 33.348289 |
| C  | 30.956860 | 5.950671 | 37.456138 | O | 32.791453 | 6.588009 | 43.499787 |
| C  | 30.332765 | 6.762888 | 36.545085 | O | 32.437219 | 4.430489 | 44.035064 |
| C  | 30.427489 | 6.507584 | 35.150094 | C | 32.516706 | 5.661798 | 44.317996 |



|    |           |          |           |    |           |          |           |
|----|-----------|----------|-----------|----|-----------|----------|-----------|
| Cu | 48.447196 | 6.400713 | 41.587749 | O  | 46.473326 | 6.618921 | 41.476721 |
| Cu | 47.997314 | 3.974343 | 42.058479 | O  | 46.067134 | 4.436507 | 41.875870 |
| C  | 52.242277 | 4.464616 | 41.931345 | C  | 45.668363 | 5.629201 | 41.614207 |
| C  | 52.828352 | 3.947593 | 43.079296 | C  | 47.873829 | 6.039511 | 45.796982 |
| C  | 54.201352 | 3.732573 | 43.123194 | C  | 48.830463 | 6.846344 | 46.440167 |
| C  | 54.987277 | 4.036578 | 42.018142 | C  | 50.045140 | 7.184662 | 32.166100 |
| C  | 54.401202 | 4.554601 | 40.869191 | C  | 48.986589 | 6.695194 | 32.923586 |
| C  | 53.028202 | 4.768621 | 40.826292 | C  | 47.999893 | 5.871199 | 32.348890 |
| C  | 52.442128 | 5.287645 | 39.677341 | C  | 46.741103 | 5.582049 | 46.526458 |
| C  | 53.229054 | 5.591649 | 38.571289 | C  | 45.700259 | 4.858721 | 45.906057 |
| C  | 54.601054 | 5.377629 | 38.616189 | C  | 44.612287 | 4.410928 | 46.648765 |
| C  | 55.187129 | 4.858606 | 39.764139 | C  | 45.921713 | 4.611142 | 32.511612 |
| O  | 55.314970 | 5.617636 | 37.405141 | C  | 46.912593 | 5.392921 | 33.121153 |
| O  | 50.372332 | 5.931473 | 41.729107 | O  | 44.848358 | 4.152097 | 33.266807 |
| O  | 49.973767 | 3.756088 | 42.179324 | O  | 48.350750 | 6.676061 | 43.552918 |
| C  | 50.775210 | 4.733646 | 41.957397 | O  | 47.919535 | 4.501543 | 43.973004 |
| C  | 48.267132 | 4.395455 | 37.817942 | C  | 48.065561 | 5.718077 | 44.356971 |
| C  | 49.053285 | 3.334876 | 37.333186 | C  | 9.830844  | 7.260885 | 57.522289 |
| C  | 49.116572 | 3.057477 | 35.974818 | C  | 8.959813  | 6.502896 | 56.749314 |
| C  | 48.390820 | 3.829969 | 35.075363 | C  | 9.429780  | 5.394897 | 56.054290 |
| C  | 47.567754 | 4.887132 | 35.516419 | C  | 10.771780 | 5.042887 | 56.134240 |
| C  | 47.492376 | 5.165572 | 36.907894 | C  | 10.370715 | 3.178901 | 54.666241 |
| C  | 46.620634 | 6.178530 | 37.354403 | C  | 9.028715  | 3.528910 | 54.587291 |
| C  | 45.881246 | 6.920925 | 36.442225 | C  | 8.558747  | 4.637908 | 55.281315 |
| C  | 45.970169 | 6.682368 | 35.080696 | O  | 8.125681  | 2.792922 | 53.781316 |
| C  | 46.817889 | 5.662289 | 34.592670 | Cu | 15.893546 | 6.138020 | 57.133923 |
| O  | 45.215079 | 7.504644 | 34.246996 | Cu | 15.341354 | 3.724228 | 57.551286 |
| O  | 48.478276 | 5.883205 | 39.668834 | C  | 19.594781 | 4.040745 | 57.437265 |
| O  | 48.096686 | 3.700340 | 40.090765 | C  | 20.147981 | 3.277401 | 58.480965 |
| C  | 48.279980 | 4.676554 | 39.278338 | C  | 21.500976 | 2.962924 | 58.494400 |
| C  | 44.206483 | 5.886142 | 41.485515 | C  | 22.324370 | 3.397233 | 57.461116 |
| C  | 43.657145 | 6.967346 | 42.198762 | C  | 21.808171 | 4.139930 | 56.381711 |
| C  | 43.867382 | 4.038344 | 39.879359 | C  | 20.423047 | 4.452287 | 56.356174 |

|   |           |          |           |    |           |          |           |
|---|-----------|----------|-----------|----|-----------|----------|-----------|
| C | 19.897813 | 5.133193 | 55.237212 | O  | 13.938891 | 6.431855 | 56.972272 |
| C | 20.732144 | 5.528433 | 54.196314 | O  | 13.435047 | 4.270298 | 57.369153 |
| C | 22.098421 | 5.262935 | 54.239540 | C  | 13.091675 | 5.475089 | 57.084547 |
| C | 22.647975 | 4.560495 | 55.320788 | C  | 15.283042 | 5.695809 | 61.352094 |
| O | 22.920753 | 5.665212 | 53.193111 | C  | 16.314083 | 6.385792 | 61.978046 |
| O | 17.795277 | 5.594841 | 57.299992 | C  | 17.647087 | 6.928780 | 47.662112 |
| O | 17.304510 | 3.423555 | 57.670957 | C  | 16.569966 | 6.488273 | 48.422721 |
| C | 18.146096 | 4.373755 | 57.482121 | C  | 15.528953 | 5.737359 | 47.844280 |
| C | 15.685825 | 4.212374 | 53.322283 | C  | 14.198077 | 5.242813 | 62.095147 |
| C | 16.411505 | 3.110369 | 52.835072 | C  | 13.166036 | 4.552830 | 61.469195 |
| C | 16.472500 | 2.841207 | 51.474934 | C  | 12.083071 | 4.099834 | 62.213248 |
| C | 15.802606 | 3.662325 | 50.575406 | C  | 13.382962 | 4.597621 | 48.010829 |
| C | 15.040839 | 4.763639 | 51.017606 | C  | 14.421833 | 5.313967 | 48.620706 |
| C | 14.970624 | 5.037012 | 52.410890 | O  | 12.291327 | 4.190867 | 48.770068 |
| C | 14.159285 | 6.098985 | 52.857104 | O  | 15.758650 | 6.378514 | 59.108000 |
| C | 13.475299 | 6.891630 | 51.943926 | O  | 15.278126 | 4.206425 | 59.477097 |
| C | 13.559537 | 6.655582 | 50.581664 | C  | 15.446276 | 5.410044 | 59.891887 |
| C | 14.344673 | 5.586714 | 50.093228 | Cu | 31.463163 | 6.145044 | 57.131260 |
| O | 12.860058 | 7.525851 | 49.748094 | Cu | 30.955701 | 3.721442 | 57.550789 |
| O | 15.947551 | 5.655519 | 55.205237 | C  | 35.200797 | 4.083059 | 57.439952 |
| O | 15.439541 | 3.489646 | 55.578734 | C  | 35.740951 | 3.344957 | 58.509040 |
| C | 15.689325 | 4.468918 | 54.788026 | C  | 37.087597 | 3.006708 | 58.535223 |
| C | 11.644813 | 5.800876 | 56.909215 | C  | 37.919043 | 3.390986 | 57.489437 |
| C | 11.172845 | 6.908875 | 57.603239 | C  | 37.418670 | 4.112408 | 56.388515 |
| C | 25.302315 | 7.076492 | 57.572741 | C  | 36.039166 | 4.451819 | 56.351773 |
| C | 24.469313 | 6.248580 | 56.829465 | C  | 35.529206 | 5.113803 | 55.215608 |
| C | 24.982422 | 5.148000 | 56.112113 | C  | 36.372877 | 5.461260 | 54.164900 |
| C | 26.378070 | 4.884830 | 56.161273 | C  | 37.733970 | 5.168749 | 54.217216 |
| C | 11.243748 | 3.934890 | 55.440215 | C  | 38.269586 | 4.486391 | 55.318639 |
| C | 26.054773 | 3.033124 | 54.624233 | O  | 38.565112 | 5.526440 | 53.161779 |
| C | 24.687529 | 3.252522 | 54.600473 | O  | 33.381433 | 5.621887 | 57.260155 |
| C | 24.126037 | 4.313433 | 55.346343 | O  | 32.919442 | 3.449770 | 57.661395 |
| O | 23.921921 | 2.371556 | 53.839452 | C  | 33.748654 | 4.407286 | 57.461577 |

|   |           |          |           |    |           |          |           |
|---|-----------|----------|-----------|----|-----------|----------|-----------|
| C | 31.252005 | 4.222725 | 53.316546 | C  | 29.818163 | 5.242633 | 62.094342 |
| C | 32.031539 | 3.161969 | 52.821616 | C  | 28.786109 | 4.552656 | 61.468406 |
| C | 32.109408 | 2.908831 | 51.459077 | C  | 27.703155 | 4.099663 | 62.212477 |
| C | 31.400489 | 3.702438 | 50.564671 | C  | 29.028995 | 4.466783 | 48.020746 |
| C | 30.578036 | 4.754456 | 51.014663 | C  | 29.949699 | 5.308583 | 48.641929 |
| C | 30.494549 | 5.015083 | 52.409805 | O  | 28.005178 | 3.929726 | 48.740412 |
| C | 29.632458 | 6.033620 | 52.861408 | O  | 31.365104 | 6.379846 | 59.106653 |
| C | 28.905473 | 6.791583 | 51.949863 | O  | 30.899419 | 4.204633 | 59.477416 |
| C | 29.000031 | 6.565254 | 50.586314 | C  | 31.063446 | 5.409408 | 59.891489 |
| C | 29.836771 | 5.541736 | 50.099612 | Cu | 47.050931 | 6.251388 | 57.151014 |
| O | 28.259375 | 7.398830 | 49.752931 | Cu | 46.686615 | 3.795058 | 57.532586 |
| O | 31.483903 | 5.671003 | 55.198654 | C  | 50.914826 | 4.464382 | 57.493755 |
| O | 31.044426 | 3.490736 | 55.575504 | C  | 51.500920 | 3.947352 | 58.641694 |
| C | 31.256689 | 4.477727 | 54.783028 | C  | 52.873920 | 3.732327 | 58.685568 |
| C | 27.216886 | 5.707562 | 56.962999 | C  | 53.659827 | 4.036331 | 57.580503 |
| C | 26.662718 | 6.810268 | 57.637869 | C  | 53.073733 | 4.554362 | 56.431564 |
| C | 40.912875 | 6.952107 | 57.633069 | C  | 51.700733 | 4.768387 | 56.388690 |
| C | 40.085536 | 6.136866 | 56.872109 | C  | 51.114640 | 5.287417 | 55.239751 |
| C | 40.602244 | 5.045964 | 56.142568 | C  | 51.901547 | 5.591423 | 54.133687 |
| C | 41.999422 | 4.783105 | 56.192452 | C  | 53.273547 | 5.377397 | 54.178561 |
| C | 26.900422 | 3.832391 | 55.383165 | C  | 53.859639 | 4.858367 | 55.326499 |
| C | 41.678514 | 2.944749 | 54.640452 | O  | 53.987443 | 5.617405 | 52.967501 |
| C | 40.311381 | 3.168268 | 54.609604 | O  | 48.991607 | 5.859508 | 57.301162 |
| C | 39.747177 | 4.224242 | 55.360891 | O  | 48.672392 | 3.655313 | 57.668263 |
| O | 39.548310 | 2.293495 | 53.839116 | C  | 49.437846 | 4.672514 | 57.497813 |
| O | 29.494735 | 6.411473 | 57.016995 | C  | 46.962186 | 4.367428 | 53.316311 |
| O | 29.043249 | 4.232345 | 57.383570 | C  | 47.784108 | 3.348784 | 52.801771 |
| C | 28.670487 | 5.433873 | 57.128604 | C  | 47.836269 | 3.095630 | 51.438619 |
| C | 30.903116 | 5.695628 | 61.351271 | C  | 47.065825 | 3.852687 | 50.564016 |
| C | 31.934171 | 6.385605 | 61.977208 | C  | 46.213442 | 4.873779 | 51.034620 |
| C | 32.987090 | 7.334607 | 47.669904 | C  | 46.146744 | 5.124109 | 52.431560 |
| C | 31.973326 | 6.790464 | 48.429685 | C  | 45.242747 | 6.093975 | 52.908362 |
| C | 31.026052 | 5.870005 | 47.874009 | C  | 44.465669 | 6.826150 | 52.019770 |

|   |           |          |           |   |           |          |           |
|---|-----------|----------|-----------|---|-----------|----------|-----------|
| C | 44.548613 | 6.619871 | 50.652664 | C | 30.799317 | 6.168593 | 64.089284 |
| C | 45.426925 | 5.640830 | 50.134519 | C | 29.767262 | 5.478616 | 63.464348 |
| O | 43.761980 | 7.438198 | 49.844729 | C | 27.651255 | 4.336645 | 63.581483 |
| O | 47.121732 | 5.803477 | 55.214922 | C | 28.683309 | 5.025622 | 64.206418 |
| O | 46.812529 | 3.595539 | 55.560886 | O | 26.563304 | 3.908650 | 64.360554 |
| C | 46.965262 | 4.604166 | 54.783520 | C | 47.502385 | 6.620342 | 63.345096 |
| C | 42.836611 | 5.605463 | 56.996305 | C | 46.419443 | 6.168348 | 64.088184 |
| C | 42.273479 | 6.691174 | 57.692987 | C | 45.387375 | 5.478376 | 63.463264 |
| C | 42.523299 | 3.736928 | 55.408569 | C | 43.271365 | 4.336411 | 63.580432 |
| O | 45.076797 | 6.400703 | 57.023778 | C | 44.303433 | 5.025383 | 64.205353 |
| O | 44.741042 | 4.194577 | 57.350054 | O | 42.183428 | 3.908416 | 64.359522 |
| C | 44.304163 | 5.381782 | 57.123597 | H | 12.119254 | 8.127133 | 26.935666 |
| C | 46.523192 | 5.695393 | 61.350166 | H | 10.573032 | 6.786854 | 25.566333 |
| C | 47.554258 | 6.385364 | 61.976087 | H | 13.383763 | 2.323394 | 22.982316 |
| C | 48.707517 | 7.164406 | 47.786106 | H | 9.847446  | 3.169729 | 22.676912 |
| C | 47.625095 | 6.685348 | 48.514770 | H | 22.115784 | 2.849689 | 28.239717 |
| C | 46.632280 | 5.891490 | 47.908315 | H | 24.509703 | 2.285929 | 28.275398 |
| C | 45.438249 | 5.242399 | 62.093255 | H | 25.983279 | 3.028143 | 26.475247 |
| C | 44.406182 | 4.552428 | 61.467335 | H | 21.469865 | 5.218615 | 24.049312 |
| C | 43.323240 | 4.099435 | 62.211424 | H | 22.950491 | 5.901127 | 22.267826 |
| C | 44.530526 | 4.665274 | 48.015353 | H | 19.532040 | 2.329460 | 22.589907 |
| C | 45.527300 | 5.414240 | 48.655850 | H | 19.679264 | 1.794024 | 20.190520 |
| O | 43.440622 | 4.206414 | 48.746278 | H | 18.480489 | 3.170817 | 18.536724 |
| O | 46.921223 | 6.443748 | 59.124213 | H | 16.651512 | 6.145316 | 22.827135 |
| O | 46.573397 | 4.239341 | 59.461338 | H | 15.506946 | 7.501029 | 21.165187 |
| C | 46.675301 | 5.443884 | 59.890907 | H | 14.495591 | 7.508317 | 27.087429 |
| C | 16.262158 | 6.620778 | 63.347051 | H | 27.515324 | 7.862516 | 26.994084 |
| C | 15.179191 | 6.168782 | 64.090104 | H | 26.042652 | 6.398286 | 25.719286 |
| C | 14.147152 | 5.478800 | 63.465152 | H | 14.941519 | 3.634106 | 24.311133 |
| C | 12.031146 | 4.336820 | 63.582253 | H | 29.090976 | 2.069016 | 23.052181 |
| C | 13.063187 | 5.025805 | 64.207205 | H | 19.763787 | 6.924642 | 30.321714 |
| O | 10.943183 | 3.908824 | 64.361306 | H | 15.665798 | 4.545495 | 29.254934 |
| C | 31.882271 | 6.620587 | 63.346214 | H | 13.751339 | 3.846370 | 30.552277 |

|   |           |          |           |   |           |          |           |
|---|-----------|----------|-----------|---|-----------|----------|-----------|
| H | 15.671692 | 6.861015 | 17.596372 | H | 46.741136 | 7.496768 | 21.164913 |
| H | 25.072102 | 6.039503 | 21.428862 | H | 45.548169 | 7.335162 | 27.193975 |
| H | 25.569095 | 2.436739 | 22.852331 | H | 46.223623 | 3.370662 | 24.471799 |
| H | 37.673663 | 2.816640 | 28.310760 | H | 50.986574 | 7.227494 | 30.247726 |
| H | 40.062844 | 2.245180 | 28.396730 | H | 47.058984 | 4.525022 | 29.327763 |
| H | 41.569245 | 2.948768 | 26.609055 | H | 45.215537 | 3.738459 | 30.677613 |
| H | 37.116535 | 5.179340 | 24.106265 | H | 46.913313 | 6.862038 | 17.595733 |
| H | 38.630784 | 5.817281 | 22.332929 | H | 56.056209 | 5.977265 | 21.104179 |
| H | 35.146058 | 2.325290 | 22.590355 | H | 10.790982 | 8.128149 | 42.498338 |
| H | 35.297745 | 1.792953 | 20.190413 | H | 9.244447  | 6.787092 | 41.129966 |
| H | 34.099803 | 3.170470 | 18.536513 | H | 12.055455 | 2.324970 | 38.544175 |
| H | 32.267957 | 6.144862 | 22.826123 | H | 8.519403  | 3.171305 | 38.239510 |
| H | 31.125441 | 7.499989 | 21.165063 | H | 20.824964 | 2.982196 | 43.684838 |
| H | 29.921137 | 7.385836 | 27.146161 | H | 23.221176 | 2.446587 | 43.790651 |
| H | 43.132153 | 7.757364 | 27.099252 | H | 24.739966 | 3.204285 | 42.037243 |
| H | 41.664398 | 6.266861 | 25.854080 | H | 20.283976 | 5.393611 | 39.503147 |
| H | 30.587141 | 3.489108 | 24.325993 | H | 21.814254 | 6.087405 | 37.765189 |
| H | 44.726140 | 1.924889 | 23.222447 | H | 18.150975 | 2.393461 | 37.876894 |
| H | 35.450194 | 6.646231 | 30.389652 | H | 18.153499 | 1.917171 | 35.465284 |
| H | 31.302176 | 4.310944 | 29.419868 | H | 16.925109 | 3.347617 | 33.921665 |
| H | 29.391703 | 3.675890 | 30.758801 | H | 15.203057 | 6.214978 | 38.379019 |
| H | 31.291872 | 6.860973 | 17.596321 | H | 13.966217 | 7.594786 | 36.813520 |
| H | 40.762650 | 5.904749 | 21.514402 | H | 13.169370 | 7.511900 | 42.644912 |
| H | 41.205496 | 2.298119 | 23.000600 | H | 26.259133 | 7.893067 | 42.893632 |
| H | 53.552003 | 3.700202 | 28.381287 | H | 24.799339 | 6.528752 | 41.490396 |
| H | 55.987723 | 3.326161 | 28.455755 | H | 13.611949 | 3.633921 | 39.868251 |
| H | 57.384075 | 3.866347 | 26.497861 | H | 27.947986 | 2.313954 | 38.616593 |
| H | 52.703465 | 5.451763 | 24.014100 | H | 18.564705 | 6.961423 | 45.733293 |
| H | 54.081117 | 5.975897 | 22.116757 | H | 19.557715 | 7.484228 | 32.707139 |
| H | 50.777529 | 2.335081 | 22.589467 | H | 17.625082 | 6.729722 | 33.992320 |
| H | 50.920925 | 1.795288 | 20.189768 | H | 14.474489 | 4.505815 | 44.811293 |
| H | 49.720401 | 3.170977 | 18.535925 | H | 12.609926 | 3.794478 | 46.172030 |
| H | 47.862597 | 6.134555 | 22.823763 | H | 12.716350 | 3.682479 | 32.584410 |

|   |           |          |           |   |           |          |           |
|---|-----------|----------|-----------|---|-----------|----------|-----------|
| H | 13.971696 | 7.223648 | 33.286681 | H | 49.733671 | 2.239967 | 35.615475 |
| H | 23.960312 | 6.246154 | 36.991284 | H | 48.465000 | 3.581708 | 34.026170 |
| H | 24.547195 | 2.689038 | 38.223119 | H | 46.485617 | 6.405093 | 38.405990 |
| H | 36.322056 | 2.724232 | 43.496936 | H | 45.217844 | 7.700138 | 36.793040 |
| H | 38.770177 | 2.168232 | 43.556109 | H | 44.296926 | 7.601416 | 42.802241 |
| H | 40.301160 | 3.122285 | 41.902454 | H | 44.926718 | 3.809019 | 39.834465 |
| H | 35.815285 | 5.659183 | 39.708441 | H | 49.681887 | 7.224661 | 45.885903 |
| H | 37.325769 | 6.552014 | 37.995902 | H | 50.788394 | 7.829816 | 32.624093 |
| H | 33.460696 | 2.130963 | 38.273590 | H | 48.934929 | 6.978728 | 33.966221 |
| H | 33.575895 | 1.590588 | 35.820484 | H | 45.701837 | 4.639955 | 44.843860 |
| H | 32.556963 | 3.074166 | 34.173290 | H | 43.828921 | 3.855155 | 46.151367 |
| H | 30.868090 | 6.171417 | 38.520536 | H | 44.218565 | 3.575601 | 32.729032 |
| H | 29.741177 | 7.625206 | 36.864231 | H | 45.308053 | 7.270142 | 33.273427 |
| H | 28.714163 | 7.430514 | 43.016441 | H | 54.726518 | 5.972725 | 36.665982 |
| H | 41.886692 | 8.064809 | 42.723111 | H | 9.463382  | 8.127040 | 58.062938 |
| H | 40.400228 | 6.670177 | 41.387993 | H | 7.916937  | 6.786690 | 56.693565 |
| H | 29.406110 | 3.657830 | 40.089438 | H | 10.728186 | 2.325406 | 54.106682 |
| H | 43.408966 | 2.461914 | 38.498720 | H | 7.191576  | 3.170330 | 53.803812 |
| H | 33.941957 | 7.401888 | 45.708144 | H | 19.518893 | 2.934610 | 59.294488 |
| H | 35.325003 | 7.172680 | 32.786952 | H | 21.915542 | 2.380464 | 59.311234 |
| H | 33.401767 | 6.465792 | 34.113757 | H | 23.372988 | 3.135211 | 57.503723 |
| H | 30.269157 | 4.398514 | 44.839024 | H | 18.841088 | 5.359010 | 55.142669 |
| H | 28.403559 | 3.524524 | 46.160241 | H | 20.306176 | 6.050714 | 53.350309 |
| H | 28.381050 | 3.570388 | 32.808651 | H | 16.941353 | 2.461529 | 53.523153 |
| H | 29.794711 | 7.226221 | 33.442160 | H | 17.042838 | 1.990857 | 51.114370 |
| H | 39.418355 | 6.716261 | 37.267825 | H | 15.871852 | 3.418357 | 49.524834 |
| H | 39.884352 | 2.881789 | 38.323171 | H | 14.029356 | 6.326810 | 53.908989 |
| H | 52.223863 | 3.709906 | 43.947690 | H | 12.859674 | 7.709193 | 52.294409 |
| H | 54.659332 | 3.328160 | 44.019912 | H | 11.840563 | 7.509201 | 58.212320 |
| H | 56.055406 | 3.866631 | 42.061230 | H | 24.888817 | 7.926377 | 58.106509 |
| H | 51.374612 | 5.452702 | 39.579093 | H | 23.415628 | 6.487519 | 56.805255 |
| H | 52.752219 | 5.975683 | 37.680078 | H | 12.285083 | 3.636314 | 55.426780 |
| H | 49.630504 | 2.727632 | 38.021210 | H | 26.463352 | 2.223083 | 54.034971 |

|   |           |          |           |   |           |          |           |
|---|-----------|----------|-----------|---|-----------|----------|-----------|
| H | 17.168294 | 6.739369 | 61.410620 | H | 50.894885 | 3.700084 | 59.506304 |
| H | 18.434582 | 7.516401 | 48.123853 | H | 53.331559 | 3.325528 | 59.581311 |
| H | 16.549267 | 6.750995 | 49.471789 | H | 54.727845 | 3.865735 | 57.623143 |
| H | 13.128808 | 4.376143 | 60.400560 | H | 50.047611 | 5.459292 | 55.145269 |
| H | 11.277806 | 3.574488 | 61.719256 | H | 51.424883 | 5.976993 | 53.243013 |
| H | 11.625158 | 3.659443 | 48.229875 | H | 48.392047 | 2.750795 | 53.471164 |
| H | 12.954309 | 7.298460 | 48.772895 | H | 48.476825 | 2.307064 | 51.056422 |
| H | 22.420666 | 6.189215 | 52.490592 | H | 47.129270 | 3.620247 | 49.510665 |
| H | 22.941238 | 2.594305 | 53.847135 | H | 45.111748 | 6.294594 | 53.965694 |
| H | 35.104101 | 3.033456 | 59.329159 | H | 43.777950 | 7.572883 | 52.393704 |
| H | 37.489794 | 2.440412 | 59.369407 | H | 42.903973 | 7.338451 | 58.292031 |
| H | 38.961460 | 3.106885 | 57.539827 | H | 43.584712 | 3.522001 | 55.363261 |
| H | 34.477694 | 5.362436 | 55.117145 | H | 48.405659 | 6.744615 | 61.407908 |
| H | 35.958920 | 5.969372 | 53.304419 | H | 49.455983 | 7.784949 | 48.268900 |
| H | 32.593938 | 2.535875 | 53.505087 | H | 47.560418 | 6.953156 | 49.560686 |
| H | 32.724486 | 2.093006 | 51.092156 | H | 44.381318 | 4.364407 | 60.399389 |
| H | 31.487403 | 3.473237 | 49.510870 | H | 42.519309 | 3.571669 | 61.717702 |
| H | 29.497013 | 6.252034 | 53.915496 | H | 42.806376 | 3.655744 | 48.186960 |
| H | 28.247892 | 7.574692 | 52.304244 | H | 43.848703 | 7.225840 | 48.865735 |
| H | 27.296794 | 7.458201 | 58.232294 | H | 53.398691 | 5.970970 | 52.227763 |
| H | 40.496024 | 7.793120 | 58.178227 | H | 17.068265 | 7.157987 | 63.836008 |
| H | 39.032716 | 6.378355 | 56.845560 | H | 15.148107 | 6.357233 | 65.155559 |
| H | 27.961915 | 3.618324 | 55.334443 | H | 10.263169 | 3.421745 | 63.797076 |
| H | 42.088204 | 2.138947 | 54.046219 | H | 32.688224 | 7.158026 | 63.835097 |
| H | 32.787939 | 6.739530 | 61.409433 | H | 30.768021 | 6.357173 | 65.154687 |
| H | 33.685118 | 8.045585 | 48.122645 | H | 25.881770 | 3.424331 | 63.795669 |
| H | 31.889815 | 7.084782 | 49.480670 | H | 48.307513 | 7.159116 | 63.833759 |
| H | 28.748430 | 4.375670 | 60.399840 | H | 46.387752 | 6.357304 | 65.153493 |
| H | 26.897622 | 3.574758 | 61.718340 | H | 41.501161 | 3.425247 | 63.794418 |
| H | 27.470646 | 3.352504 | 48.171403 | H | 54.922549 | 4.682785 | 55.325786 |
| H | 28.374154 | 7.187975 | 48.772978 | H | 56.250090 | 4.683167 | 39.763715 |
| H | 38.075987 | 6.038984 | 52.443179 | H | 57.578895 | 4.683439 | 24.200639 |
| H | 38.568112 | 2.518200 | 53.843197 | H | 32.654274 | 5.043336 | 18.026522 |

|   |           |           |           |             |           |           |           |
|---|-----------|-----------|-----------|-------------|-----------|-----------|-----------|
| H | 17.034867 | 5.043642  | 18.026671 | H           | 28.869712 | 12.503833 | 44.498084 |
| H | 10.176549 | 4.915312  | 24.089625 | H           | 30.264297 | 11.384960 | 46.251835 |
| H | 8.847993  | 4.915598  | 39.653310 | H           | 31.514049 | 9.287711  | 45.660562 |
| H | 7.520561  | 4.915553  | 55.216445 | H           | 31.391680 | 8.355677  | 43.382322 |
| H | 12.998950 | 5.198986  | 65.269020 | H           | 30.218364 | 8.356639  | 41.272657 |
| H | 28.618763 | 5.198981  | 65.268146 | H           | 29.180392 | 9.608607  | 40.791024 |
| H | 44.238613 | 5.198840  | 65.267029 |             |           |           |           |
| H | 48.274005 | 5.043193  | 18.026057 | (R,R)-2-TS1 |           |           |           |
| C | 32.766118 | 8.585356  | 39.331873 | C           | 12.487000 | 7.261000  | 26.395000 |
| C | 33.208145 | 9.556260  | 40.357228 | C           | 11.616000 | 6.503000  | 25.622000 |
| C | 34.531862 | 10.289463 | 40.224317 | C           | 12.086000 | 5.395000  | 24.927000 |
| C | 35.171629 | 10.136374 | 38.831086 | C           | 13.428000 | 5.043000  | 25.007000 |
| C | 35.064136 | 8.700645  | 38.298076 | C           | 13.027000 | 3.179000  | 23.539000 |
| C | 33.595922 | 8.292855  | 38.104888 | C           | 11.685000 | 3.529000  | 23.460000 |
| O | 33.329008 | 8.132781  | 40.573372 | C           | 11.215000 | 4.638000  | 24.154000 |
| C | 30.038258 | 9.879727  | 42.631563 | O           | 10.782000 | 2.793000  | 22.654000 |
| C | 29.336099 | 11.054848 | 42.970965 | Cu          | 18.544279 | 6.105772  | 26.008872 |
| C | 29.423642 | 11.588770 | 44.259656 | Cu          | 17.964883 | 3.717377  | 26.532327 |
| C | 30.203429 | 10.967052 | 45.242155 | C           | 22.233558 | 3.998725  | 26.386746 |
| C | 30.902261 | 9.799464  | 44.909815 | C           | 22.771881 | 3.222610  | 27.429515 |
| C | 30.829036 | 9.260555  | 43.623837 | C           | 24.127927 | 2.921829  | 27.468605 |
| N | 29.997214 | 9.353294  | 41.340010 | C           | 24.971200 | 3.382753  | 26.463274 |
| H | 34.376874 | 11.357585 | 40.459466 | C           | 24.472402 | 4.135232  | 25.383398 |
| H | 32.428277 | 10.009033 | 40.982102 | C           | 23.084060 | 4.432948  | 25.329614 |
| H | 31.688681 | 8.391958  | 39.252077 | C           | 22.579242 | 5.121731  | 24.205725 |
| H | 36.227563 | 10.458280 | 38.872828 | C           | 23.434667 | 5.543637  | 23.192807 |
| H | 34.662310 | 10.816583 | 38.119743 | C           | 24.801917 | 5.290963  | 23.264258 |
| H | 35.601685 | 8.607366  | 37.336859 | C           | 25.332373 | 4.576757  | 24.347121 |
| H | 35.547224 | 8.006168  | 39.008980 | O           | 25.643722 | 5.714771  | 22.241802 |
| H | 33.150188 | 8.846194  | 37.255544 | O           | 20.439462 | 5.553167  | 26.186142 |
| H | 33.503515 | 7.217682  | 37.874981 | O           | 19.932160 | 3.405924  | 26.655588 |
| H | 35.209246 | 9.890417  | 41.002410 | C           | 20.782719 | 4.339131  | 26.418818 |
| H | 28.719976 | 11.551847 | 42.212813 | C           | 18.226927 | 4.022014  | 22.293999 |



|   |           |          |           |    |           |          |           |
|---|-----------|----------|-----------|----|-----------|----------|-----------|
| C | 18.992915 | 2.941012 | 21.873981 | O  | 17.908434 | 4.287658 | 28.432540 |
| C | 19.081890 | 2.638017 | 20.519979 | C  | 18.101348 | 5.504580 | 28.792073 |
| C | 18.404876 | 3.417023 | 19.587993 | Cu | 34.187548 | 6.093276 | 26.027318 |
| C | 17.639888 | 4.497024 | 20.008011 | Cu | 33.609913 | 3.710292 | 26.569607 |
| C | 17.550913 | 4.800019 | 21.362013 | C  | 37.866918 | 3.935413 | 26.370051 |
| C | 16.783924 | 5.881020 | 21.784030 | C  | 38.394922 | 3.217954 | 27.459489 |
| C | 16.107910 | 6.659026 | 20.850045 | C  | 39.738360 | 2.868015 | 27.500580 |
| C | 16.197885 | 6.355031 | 19.497042 | C  | 40.578829 | 3.219777 | 26.450787 |
| C | 16.963875 | 5.274030 | 19.076025 | C  | 40.089849 | 3.915293 | 25.328704 |
| O | 15.523872 | 7.185037 | 18.539057 | C  | 38.713271 | 4.263529 | 25.274624 |
| O | 18.567471 | 5.538558 | 24.106503 | C  | 38.214960 | 4.897556 | 24.117499 |
| O | 18.037486 | 3.396819 | 24.578821 | C  | 39.067227 | 5.208344 | 23.061981 |
| C | 18.271757 | 4.342388 | 23.745259 | C  | 40.426408 | 4.910501 | 23.132036 |
| C | 14.301000 | 5.801000 | 25.782000 | C  | 40.950758 | 4.258831 | 24.257050 |
| C | 13.829000 | 6.909000 | 26.476000 | O  | 41.267062 | 5.236618 | 22.073552 |
| C | 28.019067 | 7.171843 | 26.474936 | O  | 36.089663 | 5.514958 | 26.135322 |
| C | 27.174123 | 6.314573 | 25.778627 | O  | 35.568397 | 3.381422 | 26.651733 |
| C | 27.674326 | 5.177987 | 25.111498 | C  | 36.423703 | 4.301173 | 26.390885 |
| C | 29.067943 | 4.904408 | 25.169325 | C  | 33.846854 | 4.021972 | 22.293718 |
| C | 13.900000 | 3.935000 | 24.313000 | C  | 34.612831 | 2.940969 | 21.873683 |
| C | 28.720919 | 2.982015 | 23.725598 | C  | 34.701781 | 2.637978 | 20.519678 |
| C | 27.356647 | 3.215586 | 23.692710 | C  | 34.024753 | 3.416989 | 19.587708 |
| C | 26.807825 | 4.316792 | 24.387460 | C  | 33.259776 | 4.496991 | 20.007741 |
| O | 26.581266 | 2.312584 | 22.968529 | C  | 33.170826 | 4.799983 | 21.361747 |
| O | 16.594635 | 6.411418 | 25.842996 | C  | 32.403848 | 5.880986 | 21.783781 |
| O | 16.064610 | 4.271166 | 26.319390 | C  | 31.727821 | 6.658997 | 20.849810 |
| C | 15.738471 | 5.466732 | 25.981513 | C  | 31.817771 | 6.355005 | 19.496805 |
| C | 17.910086 | 5.856767 | 30.225733 | C  | 32.583748 | 5.274002 | 19.075771 |
| C | 18.902857 | 6.612656 | 30.875705 | O  | 31.143743 | 7.185016 | 18.538835 |
| C | 16.751368 | 5.456168 | 30.948761 | O  | 34.152235 | 5.537873 | 24.119680 |
| C | 15.677649 | 4.790230 | 30.320158 | O  | 33.644559 | 3.393922 | 24.597186 |
| C | 14.561571 | 4.401028 | 31.054717 | C  | 33.873505 | 4.338737 | 23.756522 |
| O | 18.431319 | 6.433100 | 27.969401 | C  | 29.919504 | 5.757510 | 25.926917 |

|    |           |          |           |   |           |          |           |
|----|-----------|----------|-----------|---|-----------|----------|-----------|
| C  | 29.378782 | 6.898541 | 26.546945 | O | 56.643771 | 5.617805 | 21.841785 |
| C  | 43.529478 | 6.865261 | 26.484029 | O | 51.634074 | 5.835802 | 26.127230 |
| C  | 42.722695 | 6.002781 | 25.753171 | O | 51.335868 | 3.657895 | 26.637289 |
| C  | 43.262053 | 4.881830 | 25.088625 | C | 52.092240 | 4.665201 | 26.382380 |
| C  | 44.659703 | 4.634858 | 25.177768 | C | 49.466779 | 4.021876 | 22.293156 |
| C  | 29.576606 | 3.808359 | 24.443105 | C | 50.232745 | 2.940872 | 21.873104 |
| C  | 44.382330 | 2.711600 | 23.721985 | C | 50.321669 | 2.637885 | 20.519096 |
| C  | 43.015418 | 2.926235 | 23.647796 | C | 49.644627 | 3.416901 | 19.587140 |
| C  | 42.429413 | 4.014766 | 24.332281 | C | 48.879661 | 4.496905 | 20.007192 |
| O  | 42.274717 | 2.012634 | 22.901386 | C | 48.790737 | 4.799893 | 21.361200 |
| O  | 32.219311 | 6.415075 | 25.945059 | C | 48.023772 | 5.880897 | 21.783251 |
| O  | 31.713190 | 4.269309 | 26.418451 | C | 47.347731 | 6.658913 | 20.849295 |
| C  | 31.369534 | 5.465473 | 26.107299 | C | 47.437655 | 6.354926 | 19.496287 |
| C  | 33.811975 | 5.851962 | 30.275666 | C | 48.203620 | 5.273922 | 19.075235 |
| C  | 34.921071 | 6.505028 | 30.844694 | O | 46.763613 | 7.184943 | 18.538331 |
| C  | 32.665085 | 5.599474 | 31.078891 | O | 49.728359 | 5.589578 | 24.092935 |
| C  | 31.501941 | 5.010897 | 30.542453 | O | 49.389168 | 3.422110 | 24.607358 |
| C  | 30.384542 | 4.802522 | 31.347135 | C | 49.525403 | 4.367069 | 23.750354 |
| O  | 34.163080 | 6.414926 | 27.989860 | C | 45.476464 | 5.510704 | 25.945967 |
| O  | 33.610897 | 4.282988 | 28.480679 | C | 44.892587 | 6.625519 | 26.575781 |
| C  | 33.866368 | 5.492470 | 28.830656 | C | 45.205602 | 3.548065 | 24.466716 |
| Cu | 49.690003 | 6.199630 | 25.988408 | O | 47.709961 | 6.326551 | 25.886620 |
| Cu | 49.344786 | 3.780131 | 26.563651 | O | 47.393679 | 4.156722 | 26.414087 |
| C  | 53.571003 | 4.464792 | 26.367939 | C | 46.945985 | 5.315816 | 26.087740 |
| C  | 54.157058 | 3.947774 | 27.515902 | C | 49.175747 | 5.975622 | 30.222929 |
| C  | 55.530059 | 3.732759 | 27.559826 | C | 50.103586 | 6.833903 | 30.840988 |
| C  | 56.316002 | 4.036762 | 26.454787 | C | 48.068143 | 5.488188 | 30.972883 |
| C  | 55.729946 | 4.554780 | 25.305823 | C | 47.053164 | 4.709965 | 30.376409 |
| C  | 54.356947 | 4.768795 | 25.262899 | C | 45.985693 | 4.240444 | 31.135521 |
| C  | 53.770890 | 5.287813 | 24.113936 | O | 49.596260 | 6.555093 | 27.945647 |
| C  | 54.557834 | 5.591815 | 23.007897 | O | 49.291365 | 4.378898 | 28.456735 |
| C  | 55.929834 | 5.377800 | 23.052821 | C | 49.374026 | 5.615346 | 28.791494 |
| C  | 56.515889 | 4.858782 | 24.200784 | C | 11.158286 | 7.260970 | 41.959133 |

|    |           |          |           |    |           |          |           |
|----|-----------|----------|-----------|----|-----------|----------|-----------|
| C  | 10.287269 | 6.502976 | 41.186145 | O  | 13.987970 | 7.532259 | 34.281308 |
| C  | 10.757253 | 5.394976 | 40.491133 | O  | 17.230553 | 5.538035 | 39.567347 |
| C  | 12.099253 | 5.042971 | 40.571108 | O  | 16.678916 | 3.392468 | 39.992274 |
| C  | 11.698221 | 3.178978 | 39.103109 | C  | 16.921240 | 4.354646 | 39.178015 |
| C  | 10.356221 | 3.528983 | 39.024134 | C  | 12.972270 | 5.800966 | 41.346096 |
| C  | 9.886237  | 4.637982 | 39.718146 | C  | 12.500286 | 6.908965 | 42.040108 |
| O  | 9.453204  | 2.792989 | 38.218147 | C  | 26.461310 | 6.338926 | 43.333452 |
| Cu | 17.248081 | 6.055394 | 41.484280 | C  | 25.740205 | 5.784109 | 42.296583 |
| Cu | 16.643137 | 3.667183 | 41.964091 | C  | 26.356407 | 4.967979 | 41.291703 |
| C  | 20.919392 | 3.860886 | 41.813057 | C  | 27.782358 | 4.768093 | 41.390557 |
| C  | 21.377118 | 2.944990 | 42.779967 | C  | 12.571237 | 3.934972 | 39.877096 |
| C  | 22.715957 | 2.582320 | 42.848539 | C  | 27.720357 | 3.417153 | 39.371909 |
| C  | 23.629974 | 3.129913 | 41.956910 | C  | 26.312730 | 3.590709 | 39.273627 |
| C  | 23.223027 | 4.039731 | 40.964565 | C  | 25.622234 | 4.360515 | 40.207957 |
| C  | 21.845815 | 4.384529 | 40.863285 | O  | 25.770057 | 2.929697 | 38.208811 |
| C  | 21.431469 | 5.209431 | 39.797144 | O  | 15.287806 | 6.397946 | 41.371978 |
| C  | 22.363492 | 5.728491 | 38.903924 | O  | 14.746126 | 4.256416 | 41.820550 |
| C  | 23.719595 | 5.450165 | 39.045579 | C  | 14.420799 | 5.461852 | 41.518367 |
| C  | 24.162872 | 4.602370 | 40.067487 | C  | 16.727156 | 5.732402 | 45.709607 |
| O  | 24.634858 | 5.983805 | 38.146911 | C  | 17.751289 | 6.473626 | 46.328023 |
| O  | 19.145208 | 5.462202 | 41.614352 | C  | 18.792060 | 6.925534 | 32.224572 |
| O  | 18.602796 | 3.316424 | 42.039841 | C  | 17.685588 | 6.494807 | 32.948109 |
| C  | 19.471056 | 4.236996 | 41.821559 | C  | 16.653387 | 5.761325 | 32.332266 |
| C  | 16.833735 | 4.090722 | 37.716433 | C  | 15.581851 | 5.358085 | 46.467876 |
| C  | 17.500330 | 2.967935 | 37.193659 | C  | 14.485833 | 4.693889 | 45.877949 |
| C  | 17.500387 | 2.711436 | 35.829312 | C  | 13.380497 | 4.338124 | 46.644975 |
| C  | 16.831544 | 3.568158 | 34.962526 | C  | 14.485449 | 4.654472 | 32.421980 |
| C  | 16.123190 | 4.688800 | 35.443345 | C  | 15.520627 | 5.340141 | 33.071817 |
| C  | 16.105915 | 4.943424 | 36.840824 | O  | 13.366491 | 4.255237 | 33.144324 |
| C  | 15.338295 | 6.020645 | 37.327689 | O  | 17.183825 | 6.339743 | 43.451193 |
| C  | 14.645120 | 6.843486 | 36.448329 | O  | 16.639291 | 4.193707 | 43.882958 |
| C  | 14.685836 | 6.629625 | 35.080473 | C  | 16.863040 | 5.399694 | 44.263600 |
| C  | 15.434043 | 5.553483 | 34.552583 | Cu | 33.618497 | 6.712434 | 41.630936 |

|    |           |          |           |    |           |          |           |
|----|-----------|----------|-----------|----|-----------|----------|-----------|
| Cu | 32.470593 | 4.057403 | 42.255018 | C  | 41.979173 | 5.098407 | 40.481403 |
| C  | 36.597268 | 3.660813 | 41.553002 | C  | 43.380785 | 4.872483 | 40.556648 |
| C  | 37.072097 | 2.675562 | 42.398705 | C  | 28.436176 | 3.986757 | 40.391949 |
| C  | 38.429372 | 2.287579 | 42.338075 | C  | 43.154309 | 3.121122 | 38.890303 |
| C  | 39.289172 | 2.886537 | 41.442427 | C  | 41.785048 | 3.320690 | 38.821850 |
| C  | 38.837757 | 3.881313 | 40.514377 | C  | 41.178405 | 4.310996 | 39.618327 |
| C  | 37.446022 | 4.249273 | 40.555860 | O  | 41.065431 | 2.495382 | 37.962341 |
| C  | 36.959985 | 5.166664 | 39.579935 | O  | 30.642309 | 6.396447 | 42.604005 |
| C  | 37.801631 | 5.712434 | 38.640900 | O  | 30.548040 | 4.166774 | 42.505847 |
| C  | 39.190421 | 5.413214 | 38.640997 | C  | 30.008696 | 5.324645 | 42.524841 |
| C  | 39.713090 | 4.510519 | 39.564761 | C  | 32.784170 | 6.339411 | 45.796364 |
| O  | 40.012402 | 6.011713 | 37.734639 | C  | 33.634502 | 7.231962 | 46.424398 |
| O  | 35.056522 | 5.419571 | 41.712038 | C  | 34.926880 | 6.868575 | 32.185250 |
| O  | 34.288669 | 3.339829 | 42.029386 | C  | 33.816819 | 6.606802 | 32.979731 |
| C  | 35.206159 | 4.164839 | 41.772171 | C  | 32.672267 | 5.985093 | 32.447667 |
| C  | 32.446368 | 4.616371 | 38.042378 | C  | 31.658334 | 5.785610 | 46.498493 |
| C  | 32.827579 | 3.338011 | 37.666522 | C  | 30.700278 | 4.942575 | 45.866165 |
| C  | 32.835533 | 2.973089 | 36.304762 | C  | 29.588024 | 4.497663 | 46.537217 |
| C  | 32.429754 | 3.869955 | 35.339247 | C  | 30.394792 | 5.166808 | 32.691756 |
| C  | 31.980837 | 5.188361 | 35.672582 | C  | 31.530709 | 5.761316 | 33.250140 |
| C  | 32.003277 | 5.565331 | 37.063555 | O  | 29.267835 | 4.963897 | 33.477801 |
| C  | 31.536443 | 6.863273 | 37.418257 | O  | 33.457109 | 6.919414 | 43.605263 |
| C  | 31.079575 | 7.737436 | 36.465751 | O  | 32.893780 | 4.777011 | 44.035281 |
| C  | 31.065127 | 7.380022 | 35.090842 | C  | 33.064089 | 5.982995 | 44.363788 |
| C  | 31.512585 | 6.126479 | 34.685573 | Cu | 48.398154 | 6.310315 | 41.571648 |
| O  | 30.591874 | 8.373163 | 34.279006 | Cu | 48.007877 | 3.874889 | 42.047292 |
| O  | 33.002833 | 6.073360 | 39.841809 | C  | 52.242278 | 4.464620 | 41.931334 |
| O  | 32.211708 | 4.013874 | 40.297727 | C  | 52.828353 | 3.947597 | 43.079285 |
| C  | 32.551753 | 4.937095 | 39.504981 | C  | 54.201353 | 3.732577 | 43.123183 |
| C  | 28.507170 | 5.389297 | 42.457460 | C  | 54.987278 | 4.036581 | 42.018131 |
| C  | 27.856399 | 6.150880 | 43.413806 | C  | 54.401203 | 4.554604 | 40.869180 |
| C  | 42.192177 | 6.912323 | 42.097923 | C  | 53.028203 | 4.768624 | 40.826281 |
| C  | 41.408246 | 6.116717 | 41.270775 | C  | 52.442128 | 5.287648 | 39.677330 |

|   |           |          |           |    |           |          |           |
|---|-----------|----------|-----------|----|-----------|----------|-----------|
| C | 53.229054 | 5.591652 | 38.571278 | C  | 45.675202 | 4.762199 | 45.909410 |
| C | 54.601054 | 5.377632 | 38.616177 | C  | 44.582809 | 4.330262 | 46.655820 |
| C | 55.187129 | 4.858609 | 39.764128 | C  | 45.900461 | 4.524292 | 32.496118 |
| O | 55.314970 | 5.617639 | 37.405129 | C  | 46.874955 | 5.319536 | 33.114515 |
| O | 50.337208 | 5.890237 | 41.714517 | O  | 44.830022 | 4.045403 | 33.242954 |
| O | 49.989217 | 3.708926 | 42.176743 | O  | 48.294948 | 6.588339 | 43.535566 |
| C | 50.768511 | 4.703398 | 41.950141 | O  | 47.907060 | 4.407193 | 43.963012 |
| C | 48.250786 | 4.302200 | 37.801807 | C  | 48.030533 | 5.627877 | 44.343561 |
| C | 49.041792 | 3.249427 | 37.307107 | C  | 9.830848  | 7.260896 | 57.522290 |
| C | 49.098036 | 2.978794 | 35.946779 | C  | 8.959816  | 6.502907 | 56.749315 |
| C | 48.361178 | 3.749636 | 35.055132 | C  | 9.429783  | 5.394908 | 56.054291 |
| C | 47.533146 | 4.798482 | 35.505488 | C  | 10.771783 | 5.042898 | 56.134241 |
| C | 47.463530 | 5.069875 | 36.898826 | C  | 10.370718 | 3.178911 | 54.666243 |
| C | 46.586014 | 6.074498 | 37.353853 | C  | 9.028718  | 3.528920 | 54.587293 |
| C | 45.836076 | 6.815168 | 36.448617 | C  | 8.558750  | 4.637919 | 55.281317 |
| C | 45.919224 | 6.582684 | 35.085796 | O  | 8.125684  | 2.792932 | 53.781319 |
| C | 46.773993 | 5.573048 | 34.588715 | Cu | 15.894143 | 6.147587 | 57.132322 |
| O | 45.151520 | 7.400853 | 34.259965 | Cu | 15.351076 | 3.731734 | 57.545932 |
| O | 48.442508 | 5.791079 | 39.654325 | C  | 19.608464 | 4.066879 | 57.416480 |
| O | 48.119765 | 3.599565 | 40.078233 | C  | 20.170150 | 3.290182 | 58.446140 |
| C | 48.272067 | 4.580234 | 39.264046 | C  | 21.525232 | 2.982885 | 58.449278 |
| C | 44.173013 | 5.671311 | 41.427680 | C  | 22.342913 | 3.437053 | 57.420009 |
| C | 43.561713 | 6.697562 | 42.170635 | C  | 21.819348 | 4.193139 | 56.354115 |
| C | 43.955038 | 3.880887 | 39.737059 | C  | 20.432260 | 4.499705 | 56.338930 |
| O | 46.416846 | 6.475908 | 41.457384 | C  | 19.900772 | 5.196529 | 55.232747 |
| O | 46.068163 | 4.282389 | 41.851539 | C  | 20.729402 | 5.609456 | 54.194080 |
| C | 45.639020 | 5.462938 | 41.585084 | C  | 22.096537 | 5.346906 | 54.226591 |
| C | 47.841763 | 5.953645 | 45.783981 | C  | 22.653604 | 4.632122 | 55.295866 |
| C | 48.797391 | 6.768842 | 46.418839 | O  | 22.912181 | 5.765811 | 53.181337 |
| C | 49.980776 | 7.169112 | 32.183727 | O  | 17.798908 | 5.612738 | 57.295522 |
| C | 48.926122 | 6.659137 | 32.933016 | O  | 17.318597 | 3.438998 | 57.662624 |
| C | 47.957944 | 5.819851 | 32.349831 | C  | 18.156538 | 4.392769 | 57.471730 |
| C | 46.710131 | 5.502035 | 46.519324 | C  | 15.678686 | 4.225204 | 53.315541 |

|   |           |          |           |    |           |          |           |
|---|-----------|----------|-----------|----|-----------|----------|-----------|
| C | 16.386341 | 3.111902 | 52.826267 | C  | 13.166040 | 4.552842 | 61.469196 |
| C | 16.426690 | 2.832797 | 51.467505 | C  | 12.083075 | 4.099846 | 62.213249 |
| C | 15.754288 | 3.654306 | 50.570978 | C  | 13.333891 | 4.629821 | 48.006028 |
| C | 15.013443 | 4.769259 | 51.013985 | C  | 14.390451 | 5.318078 | 48.618205 |
| C | 14.963876 | 5.053798 | 52.406181 | O  | 12.222115 | 4.268168 | 48.758798 |
| C | 14.173096 | 6.131017 | 52.853197 | O  | 15.758320 | 6.383215 | 59.108266 |
| C | 13.489018 | 6.925889 | 51.941604 | O  | 15.284104 | 4.209217 | 59.473737 |
| C | 13.553876 | 6.678244 | 50.580271 | C  | 15.447778 | 5.412678 | 59.890865 |
| C | 14.319137 | 5.595490 | 50.090817 | Cu | 31.479086 | 6.226884 | 57.140298 |
| O | 12.859977 | 7.554270 | 49.748451 | Cu | 30.962413 | 3.797448 | 57.506110 |
| O | 15.948997 | 5.668044 | 55.201306 | C  | 35.209395 | 4.147389 | 57.434250 |
| O | 15.448916 | 3.500442 | 55.573071 | C  | 35.747677 | 3.405272 | 58.501644 |
| C | 15.691941 | 4.481433 | 54.782404 | C  | 37.090783 | 3.051969 | 58.519725 |
| C | 11.644816 | 5.800887 | 56.909216 | C  | 37.919468 | 3.422025 | 57.466747 |
| C | 11.172849 | 6.908886 | 57.603240 | C  | 37.420703 | 4.146905 | 56.367600 |
| C | 25.312328 | 7.170930 | 57.515370 | C  | 36.046014 | 4.506440 | 56.341165 |
| C | 24.478796 | 6.337172 | 56.779526 | C  | 35.538352 | 5.179833 | 55.210751 |
| C | 24.991292 | 5.231474 | 56.070733 | C  | 36.378320 | 5.509886 | 54.151212 |
| C | 26.387511 | 4.968632 | 56.120999 | C  | 37.734441 | 5.192616 | 54.191004 |
| C | 11.243751 | 3.934900 | 55.440217 | C  | 38.269083 | 4.506565 | 55.290725 |
| C | 26.060940 | 3.105185 | 54.597976 | O  | 38.561705 | 5.532801 | 53.126744 |
| C | 24.693916 | 3.325408 | 54.573585 | O  | 33.396202 | 5.697529 | 57.278200 |
| C | 24.133301 | 4.391032 | 55.313026 | O  | 32.924631 | 3.519070 | 57.630800 |
| O | 23.927846 | 2.442012 | 53.816300 | C  | 33.758398 | 4.477659 | 57.456888 |
| O | 13.938297 | 6.435880 | 56.971788 | C  | 31.340812 | 4.382221 | 53.282075 |
| O | 13.441100 | 4.272178 | 57.364271 | C  | 32.088409 | 3.293620 | 52.796331 |
| C | 13.093424 | 5.476896 | 57.082528 | C  | 32.210042 | 3.061735 | 51.433347 |
| C | 15.283046 | 5.695821 | 61.352095 | C  | 31.578269 | 3.904840 | 50.527458 |
| C | 16.314087 | 6.385804 | 61.978046 | C  | 30.791366 | 4.988884 | 50.964508 |
| C | 17.679544 | 6.806793 | 47.674342 | C  | 30.663200 | 5.229620 | 52.360006 |
| C | 16.578615 | 6.416457 | 48.427624 | C  | 29.837149 | 6.285623 | 52.793765 |
| C | 15.518635 | 5.694203 | 47.847460 | C  | 29.185122 | 7.092773 | 51.867079 |
| C | 14.198081 | 5.242825 | 62.095148 | C  | 29.313877 | 6.875323 | 50.505353 |

|   |           |          |           |    |           |          |           |
|---|-----------|----------|-----------|----|-----------|----------|-----------|
| C | 30.126428 | 5.825714 | 50.035196 | Cu | 47.050074 | 6.251607 | 57.146971 |
| O | 28.625689 | 7.738707 | 49.657727 | Cu | 46.683736 | 3.796362 | 57.529837 |
| O | 31.526579 | 5.794363 | 55.199049 | C  | 50.914829 | 4.464394 | 57.493750 |
| O | 31.074236 | 3.609339 | 55.524902 | C  | 51.500923 | 3.947364 | 58.641689 |
| C | 31.305134 | 4.610600 | 54.754721 | C  | 52.873923 | 3.732339 | 58.685563 |
| C | 27.228171 | 5.797078 | 56.917009 | C  | 53.659830 | 4.036343 | 57.580498 |
| C | 26.673142 | 6.905537 | 57.582894 | C  | 53.073736 | 4.554373 | 56.431559 |
| C | 40.913311 | 6.974770 | 57.594690 | C  | 51.700736 | 4.768398 | 56.388685 |
| C | 40.087014 | 6.160764 | 56.831990 | C  | 51.114643 | 5.287428 | 55.239746 |
| C | 40.601575 | 5.060472 | 56.115562 | C  | 51.901549 | 5.591433 | 54.133681 |
| C | 41.996260 | 4.786809 | 56.180185 | C  | 53.273549 | 5.377407 | 54.178555 |
| C | 26.908053 | 3.909740 | 55.350182 | C  | 53.859642 | 4.858378 | 55.326493 |
| C | 41.672237 | 2.935676 | 54.643463 | O  | 53.987445 | 5.617415 | 52.967495 |
| C | 40.307912 | 3.173333 | 54.595213 | O  | 48.990976 | 5.858924 | 57.297802 |
| C | 39.746113 | 4.239582 | 55.333495 | O  | 48.670697 | 3.655349 | 57.666847 |
| O | 39.544858 | 2.301675 | 53.821711 | C  | 49.437093 | 4.672171 | 57.496541 |
| O | 29.509902 | 6.498540 | 57.007529 | C  | 46.953008 | 4.362430 | 53.309956 |
| O | 29.052446 | 4.314301 | 57.329927 | C  | 47.763687 | 3.333158 | 52.797366 |
| C | 28.682448 | 5.520120 | 57.091800 | C  | 47.801229 | 3.066088 | 51.436327 |
| C | 30.903120 | 5.695641 | 61.351269 | C  | 47.025892 | 3.817123 | 50.561507 |
| C | 31.934175 | 6.385618 | 61.977205 | C  | 46.185672 | 4.849300 | 51.028730 |
| C | 33.445039 | 7.557159 | 47.785711 | C  | 46.136836 | 5.117989 | 52.423509 |
| C | 32.392098 | 7.019087 | 48.495057 | C  | 45.249653 | 6.105086 | 52.896552 |
| C | 31.445088 | 6.136668 | 47.880646 | C  | 44.468351 | 6.831582 | 52.006417 |
| C | 29.818167 | 5.242646 | 62.094340 | C  | 44.529623 | 6.602006 | 50.641666 |
| C | 28.786113 | 4.552669 | 61.468405 | C  | 45.394615 | 5.609595 | 50.126684 |
| C | 27.703159 | 4.099675 | 62.212476 | O  | 43.736056 | 7.411596 | 49.832213 |
| C | 29.381179 | 4.820830 | 47.903571 | O  | 47.120095 | 5.802377 | 55.209090 |
| C | 30.301672 | 5.618514 | 48.580848 | O  | 46.809448 | 3.595469 | 55.557561 |
| O | 28.283935 | 4.342916 | 48.554002 | C  | 46.961139 | 4.602843 | 54.778147 |
| O | 31.360934 | 6.420496 | 59.119220 | C  | 42.833750 | 5.611188 | 56.982872 |
| O | 30.887613 | 4.239967 | 59.444707 | C  | 42.271687 | 6.705604 | 57.667574 |
| C | 31.055533 | 5.435393 | 59.884453 | C  | 42.517340 | 3.727220 | 55.412448 |

|   |           |          |           |   |           |          |           |
|---|-----------|----------|-----------|---|-----------|----------|-----------|
| O | 45.075782 | 6.403046 | 57.018498 | C | 44.303437 | 5.025398 | 64.205349 |
| O | 44.737413 | 4.197816 | 57.345665 | O | 42.183431 | 3.908432 | 64.359519 |
| C | 44.301464 | 5.385081 | 57.116600 | H | 12.119185 | 8.126906 | 26.935985 |
| C | 46.523195 | 5.695406 | 61.350162 | H | 10.573009 | 6.786731 | 25.566619 |
| C | 47.554262 | 6.385378 | 61.976082 | H | 13.382333 | 2.322297 | 22.983053 |
| C | 48.672821 | 7.103220 | 47.760685 | H | 9.847342  | 3.169286 | 22.676731 |
| C | 47.588431 | 6.635847 | 48.493342 | H | 22.129661 | 2.863612 | 28.226095 |
| C | 46.596709 | 5.834146 | 47.896111 | H | 24.530380 | 2.331705 | 28.285723 |
| C | 45.438253 | 5.242413 | 62.093251 | H | 26.021968 | 3.133797 | 26.527965 |
| C | 44.406185 | 4.552442 | 61.467332 | H | 21.522341 | 5.331294 | 24.082143 |
| C | 43.323243 | 4.099449 | 62.211421 | H | 23.023437 | 6.073682 | 22.344493 |
| C | 44.493467 | 4.612606 | 48.016809 | H | 19.533554 | 2.330748 | 22.589829 |
| C | 45.489285 | 5.370291 | 48.648664 | H | 19.680116 | 1.794647 | 20.190449 |
| O | 43.398584 | 4.170436 | 48.750605 | H | 18.480939 | 3.171035 | 18.536732 |
| O | 46.920354 | 6.444545 | 59.122059 | H | 16.652667 | 6.146055 | 22.827010 |
| O | 46.570133 | 4.240719 | 59.459188 | H | 15.507071 | 7.501615 | 21.163912 |
| C | 46.673999 | 5.444889 | 59.889484 | H | 14.495540 | 7.508496 | 27.087300 |
| C | 16.262162 | 6.620790 | 63.347051 | H | 27.614503 | 8.050017 | 26.967606 |
| C | 15.179196 | 6.168795 | 64.090104 | H | 26.121418 | 6.557937 | 25.749444 |
| C | 14.147156 | 5.478812 | 63.465153 | H | 14.941022 | 3.632171 | 24.315868 |
| C | 12.031150 | 4.336833 | 63.582254 | H | 29.118764 | 2.138924 | 23.176548 |
| C | 13.063191 | 5.025817 | 64.207206 | H | 19.776788 | 6.946706 | 30.327542 |
| O | 10.943187 | 3.908837 | 64.361307 | H | 15.675724 | 4.573355 | 29.257184 |
| C | 31.882275 | 6.620600 | 63.346211 | H | 13.752556 | 3.890153 | 30.550568 |
| C | 30.799322 | 6.168606 | 64.089282 | H | 15.672568 | 6.862090 | 17.596212 |
| C | 29.767267 | 5.478629 | 63.464346 | H | 25.153578 | 6.240363 | 21.533417 |
| C | 27.651260 | 4.336658 | 63.581482 | H | 25.602410 | 2.543779 | 22.969498 |
| C | 28.683314 | 5.025635 | 64.206417 | H | 37.753154 | 2.937822 | 28.287515 |
| O | 26.563309 | 3.908663 | 64.360554 | H | 40.132415 | 2.322194 | 28.351896 |
| C | 47.502389 | 6.620356 | 63.345091 | H | 41.619234 | 2.930976 | 26.515630 |
| C | 46.419447 | 6.168363 | 64.088179 | H | 37.165867 | 5.151416 | 24.005886 |
| C | 45.387379 | 5.478391 | 63.463260 | H | 38.661923 | 5.695672 | 22.185675 |
| C | 43.271369 | 4.336426 | 63.580429 | H | 35.150390 | 2.329666 | 22.590745 |



|   |           |          |           |   |           |          |           |
|---|-----------|----------|-----------|---|-----------|----------|-----------|
| H | 35.299001 | 1.793872 | 20.190336 | H | 9.244445  | 6.787034 | 41.130187 |
| H | 34.100133 | 3.170613 | 18.536533 | H | 12.054315 | 2.324810 | 38.543621 |
| H | 32.266453 | 6.144287 | 22.826145 | H | 8.520586  | 3.174246 | 38.234839 |
| H | 31.125007 | 7.500137 | 21.163930 | H | 20.682548 | 2.517344 | 43.494774 |
| H | 30.021558 | 7.569531 | 27.105668 | H | 23.050704 | 1.877964 | 43.603602 |
| H | 43.094423 | 7.727737 | 26.978617 | H | 24.665918 | 2.826961 | 42.042846 |
| H | 41.667865 | 6.230554 | 25.698738 | H | 20.388588 | 5.449471 | 39.622201 |
| H | 30.635328 | 3.579665 | 24.402700 | H | 22.019833 | 6.360600 | 38.096161 |
| H | 44.807939 | 1.874820 | 23.184345 | H | 18.035361 | 2.296191 | 37.855582 |
| H | 35.791974 | 6.725074 | 30.237037 | H | 18.026254 | 1.846206 | 35.438801 |
| H | 31.435790 | 4.714621 | 29.499931 | H | 16.855995 | 3.335397 | 33.907408 |
| H | 29.502052 | 4.351883 | 30.913124 | H | 15.248503 | 6.236439 | 38.386341 |
| H | 31.288511 | 6.858988 | 17.596573 | H | 14.061028 | 7.670571 | 36.829470 |
| H | 40.785939 | 5.737824 | 21.341642 | H | 13.169561 | 7.508826 | 42.647560 |
| H | 41.293347 | 2.231138 | 22.875232 | H | 25.951448 | 6.942784 | 44.091220 |
| H | 53.552163 | 3.700132 | 28.381390 | H | 24.665185 | 5.984485 | 42.259921 |
| H | 55.987753 | 3.326329 | 28.455821 | H | 13.611819 | 3.634247 | 39.864799 |
| H | 57.384050 | 3.866374 | 26.497949 | H | 28.212125 | 2.816420 | 38.602191 |
| H | 52.703612 | 5.455003 | 24.016646 | H | 18.616474 | 6.787378 | 45.754480 |
| H | 54.081385 | 5.977075 | 22.117086 | H | 19.570815 | 7.500497 | 32.715205 |
| H | 50.777312 | 2.334731 | 22.589330 | H | 17.633926 | 6.753237 | 33.997203 |
| H | 50.920732 | 1.795127 | 20.189808 | H | 14.458461 | 4.450327 | 44.821303 |
| H | 49.720219 | 3.170699 | 18.535998 | H | 12.554651 | 3.825892 | 46.170335 |
| H | 47.864823 | 6.135689 | 22.823765 | H | 12.709393 | 3.737742 | 32.579618 |
| H | 46.741261 | 7.497332 | 21.163701 | H | 14.024142 | 7.300252 | 33.303363 |
| H | 45.508266 | 7.312671 | 27.145613 | H | 24.205734 | 6.611071 | 37.482229 |
| H | 46.267966 | 3.332399 | 24.463738 | H | 24.812208 | 3.058465 | 38.134265 |
| H | 50.935493 | 7.233800 | 30.271998 | H | 36.395100 | 2.230286 | 43.132427 |
| H | 47.059050 | 4.464380 | 29.319899 | H | 38.803744 | 1.518885 | 43.021512 |
| H | 45.221398 | 3.644203 | 30.655834 | H | 40.339819 | 2.579632 | 41.437690 |
| H | 46.906476 | 6.857497 | 17.596316 | H | 35.905007 | 5.441845 | 39.565748 |
| H | 56.056722 | 5.973371 | 21.101869 | H | 37.402645 | 6.405829 | 37.890672 |
| H | 10.790804 | 8.127563 | 42.499154 | H | 33.135431 | 2.626710 | 38.436441 |

|                                |                                |
|--------------------------------|--------------------------------|
| H 33.163407 1.970123 36.013591 | H 45.685857 4.517189 44.852772 |
| H 32.447869 3.546661 34.293437 | H 43.802715 3.763091 46.166322 |
| H 31.546515 7.160106 38.464980 | H 44.211766 3.461210 32.699898 |
| H 30.713617 8.731807 36.736190 | H 45.226474 7.158152 33.286926 |
| H 28.424528 6.604204 44.230401 | H 54.726433 5.965678 36.662652 |
| H 41.733209 7.700464 42.686350 | H 9.463473 8.127253 58.062682  |
| H 40.345386 6.317151 41.241254 | H 7.917045 6.786977 56.693388  |
| H 29.515319 3.831343 40.443166 | H 10.726902 2.324714 54.106889 |
| H 43.601674 2.360189 38.264203 | H 7.193629 3.175569 53.796225  |
| H 34.459610 7.668477 45.856146 | H 19.546308 2.931804 59.257358 |
| H 35.795390 7.360515 32.611708 | H 21.946438 2.390374 59.254977 |
| H 33.855227 6.906371 34.019614 | H 23.393031 3.179729 57.454618 |
| H 30.848105 4.634332 44.835415 | H 18.843264 5.421243 55.145257 |
| H 28.857459 3.870446 46.012734 | H 20.298129 6.143458 53.358249 |
| H 28.530506 4.485465 32.981088 | H 16.916148 2.460060 53.512006 |
| H 30.548886 8.106040 33.347583 | H 16.981550 1.973356 51.105228 |
| H 39.504330 6.637403 37.193406 | H 15.805565 3.399850 49.521965 |
| H 40.079265 2.707245 37.941188 | H 14.059800 6.370390 53.904366 |
| H 52.223423 3.705219 43.946082 | H 12.890110 7.755842 52.292181 |
| H 54.659189 3.327090 44.019492 | H 11.840652 7.509580 58.211824 |
| H 56.055329 3.866298 42.061191 | H 24.898086 8.023961 58.042922 |
| H 51.374992 5.456018 39.580712 | H 23.424881 6.575069 56.754263 |
| H 52.752566 5.976914 37.680378 | H 12.284714 3.635170 55.428892 |
| H 49.629143 2.643909 37.988460 | H 26.467891 2.290095 54.014417 |
| H 49.719008 2.168378 35.579079 | H 17.168373 6.739465 61.410792 |
| H 48.430456 3.506558 34.004424 | H 18.481695 7.371855 48.138167 |
| H 46.453597 6.295812 38.406755 | H 16.555048 6.695336 49.472419 |
| H 45.168107 7.587742 36.805676 | H 13.131933 4.372836 60.400895 |
| H 44.158179 7.326822 42.821942 | H 11.278243 3.573460 61.719598 |
| H 45.022072 3.684781 39.728527 | H 11.546059 3.747664 48.219925 |
| H 49.648473 7.142819 45.860589 | H 12.937878 7.316610 48.774375 |
| H 50.709031 7.825404 32.649147 | H 22.405513 6.291910 52.484986 |
| H 48.862327 6.938763 33.976067 | H 22.948829 2.672058 53.814284 |

|   |           |          |           |   |           |          |           |
|---|-----------|----------|-----------|---|-----------|----------|-----------|
| H | 35.112032 | 3.100896 | 59.325672 | H | 43.793553 | 7.591744 | 52.377009 |
| H | 37.492401 | 2.483129 | 59.352001 | H | 42.901469 | 7.354139 | 58.266501 |
| H | 38.958295 | 3.123858 | 57.509962 | H | 43.576727 | 3.500372 | 55.380781 |
| H | 34.491579 | 5.452185 | 55.124407 | H | 48.405415 | 6.744949 | 61.407787 |
| H | 35.966083 | 6.025804 | 53.294630 | H | 49.420118 | 7.729530 | 48.237022 |
| H | 32.593842 | 2.628871 | 53.488283 | H | 47.521327 | 6.919089 | 49.535036 |
| H | 32.799567 | 2.223932 | 51.074627 | H | 44.382152 | 4.362947 | 60.399651 |
| H | 31.696221 | 3.688454 | 49.473859 | H | 42.519470 | 3.571135 | 61.717957 |
| H | 29.667866 | 6.494110 | 53.844640 | H | 42.764826 | 3.611326 | 48.198779 |
| H | 28.551449 | 7.901141 | 52.207775 | H | 43.789414 | 7.166144 | 48.858627 |
| H | 27.306342 | 7.557372 | 58.174494 | H | 53.398482 | 5.963239 | 52.224232 |
| H | 40.497017 | 7.821866 | 58.130151 | H | 17.068392 | 7.157758 | 63.836081 |
| H | 39.036558 | 6.410600 | 56.793967 | H | 15.148237 | 6.357150 | 65.155560 |
| H | 27.969351 | 3.695063 | 55.300646 | H | 10.261813 | 3.422545 | 63.798034 |
| H | 42.079271 | 2.119364 | 54.061760 | H | 32.687856 | 7.158700 | 63.834996 |
| H | 32.786366 | 6.743099 | 61.409254 | H | 30.768036 | 6.357363 | 65.154634 |
| H | 34.139310 | 8.243720 | 48.280453 | H | 25.879052 | 3.427641 | 63.796130 |
| H | 32.270857 | 7.296407 | 49.547009 | H | 48.307446 | 7.159291 | 63.833705 |
| H | 28.751334 | 4.371811 | 60.400451 | H | 46.387793 | 6.357514 | 65.153432 |
| H | 26.898087 | 3.573613 | 61.718767 | H | 41.497826 | 3.429807 | 63.794561 |
| H | 27.767584 | 3.780090 | 47.954155 | H | 54.922507 | 4.682757 | 55.325512 |
| H | 28.665658 | 7.458920 | 48.689083 | H | 56.250046 | 4.683165 | 39.763409 |
| H | 38.074402 | 6.048062 | 52.408628 | H | 57.578867 | 4.683520 | 24.200343 |
| H | 38.570975 | 2.550701 | 53.794965 | H | 32.654209 | 5.043651 | 18.026503 |
| H | 50.894830 | 3.699832 | 59.506148 | H | 17.034665 | 5.043841 | 18.026657 |
| H | 53.331526 | 3.325381 | 59.581258 | H | 10.176533 | 4.915038 | 24.089435 |
| H | 54.727794 | 3.865558 | 57.623197 | H | 8.847931  | 4.915196 | 39.653322 |
| H | 50.047845 | 5.461044 | 55.146020 | H | 7.520482  | 4.915141 | 55.216550 |
| H | 51.425160 | 5.977887 | 53.243204 | H | 12.998694 | 5.198799 | 65.269003 |
| H | 48.372887 | 2.736121 | 53.466896 | H | 28.618525 | 5.198859 | 65.268118 |
| H | 48.432623 | 2.269887 | 51.055567 | H | 44.238379 | 5.198801 | 65.266981 |
| H | 47.076086 | 3.571289 | 49.510525 | H | 48.273938 | 5.043458 | 18.026037 |
| H | 45.135554 | 6.324597 | 53.952073 | C | 31.750921 | 8.755990 | 40.910124 |

|                       |           |           |           |    |           |          |           |
|-----------------------|-----------|-----------|-----------|----|-----------|----------|-----------|
| C                     | 31.743691 | 9.199883  | 42.312250 | C  | 11.616000 | 6.503000 | 25.622000 |
| C                     | 32.061263 | 10.613501 | 42.684199 | C  | 12.086000 | 5.395000 | 24.927000 |
| C                     | 31.654205 | 11.620618 | 41.600229 | C  | 13.428000 | 5.043000 | 25.007000 |
| C                     | 32.132772 | 11.169742 | 40.212445 | C  | 13.027000 | 3.179000 | 23.539000 |
| C                     | 31.521918 | 9.812346  | 39.837459 | C  | 11.685000 | 3.529000 | 23.460000 |
| O                     | 33.117985 | 8.536899  | 41.209557 | C  | 11.215000 | 4.638000 | 24.154000 |
| C                     | 29.364463 | 9.445402  | 44.177028 | O  | 10.782000 | 2.793000 | 22.654000 |
| C                     | 28.653592 | 10.615383 | 44.496075 | Cu | 18.545211 | 6.099706 | 26.004396 |
| C                     | 28.559279 | 11.042126 | 45.824400 | Cu | 17.957621 | 3.712909 | 26.529586 |
| C                     | 29.180572 | 10.320728 | 46.850354 | C  | 22.221207 | 3.972023 | 26.370636 |
| C                     | 29.897456 | 9.160678  | 46.531397 | C  | 22.764886 | 3.214615 | 27.423776 |
| C                     | 29.985232 | 8.718032  | 45.210609 | C  | 24.118096 | 2.901312 | 27.452650 |
| N                     | 29.549100 | 9.040941  | 42.844620 | C  | 24.952702 | 3.333636 | 26.427392 |
| H                     | 31.581898 | 10.835191 | 43.654487 | C  | 24.446952 | 4.068344 | 25.337960 |
| H                     | 31.828345 | 8.425025  | 43.069718 | C  | 23.060449 | 4.373771 | 25.293200 |
| H                     | 31.194227 | 7.826765  | 40.710479 | C  | 22.545304 | 5.036966 | 24.158835 |
| H                     | 32.054713 | 12.618811 | 41.850737 | C  | 23.390644 | 5.428201 | 23.125328 |
| H                     | 30.550061 | 11.715286 | 41.593116 | C  | 24.758122 | 5.174392 | 23.189753 |
| H                     | 31.869558 | 11.923887 | 39.449546 | C  | 25.297986 | 4.485402 | 24.284302 |
| H                     | 33.234665 | 11.080650 | 40.214520 | O  | 25.590849 | 5.570430 | 22.148912 |
| H                     | 30.428440 | 9.915772  | 39.688509 | O  | 20.438399 | 5.538538 | 26.177222 |
| H                     | 31.943625 | 9.437701  | 38.888878 | O  | 19.921198 | 3.393754 | 26.650254 |
| H                     | 33.150752 | 10.656827 | 42.867720 | C  | 20.774832 | 4.322449 | 26.409936 |
| H                     | 28.170881 | 11.189206 | 43.697209 | C  | 18.226927 | 4.022014 | 22.293999 |
| H                     | 27.994923 | 11.951350 | 46.056683 | C  | 18.992915 | 2.941012 | 21.873981 |
| H                     | 29.109885 | 10.656803 | 47.888998 | C  | 19.081890 | 2.638017 | 20.519979 |
| H                     | 30.410756 | 8.592797  | 47.312290 | C  | 18.404876 | 3.417023 | 19.587993 |
| H                     | 30.543213 | 7.809259  | 44.973637 | C  | 17.639888 | 4.497024 | 20.008011 |
| H                     | 29.663210 | 8.023321  | 42.709324 | C  | 17.550913 | 4.800019 | 21.362013 |
| H                     | 28.898389 | 9.450774  | 42.176619 | C  | 16.783924 | 5.881020 | 21.784030 |
|                       |           |           |           | C  | 16.107910 | 6.659026 | 20.850045 |
| ( <i>R,R</i> )-2-Int1 |           |           |           | C  | 16.197885 | 6.355031 | 19.497042 |
| C                     | 12.487000 | 7.261000  | 26.395000 | C  | 16.963875 | 5.274030 | 19.076025 |

|    |           |          |           |   |           |          |           |
|----|-----------|----------|-----------|---|-----------|----------|-----------|
| O  | 15.523872 | 7.185037 | 18.539057 | C | 38.671631 | 4.201388 | 25.340775 |
| O  | 18.566589 | 5.534636 | 24.104811 | C | 38.186422 | 4.862058 | 24.193079 |
| O  | 18.028183 | 3.394469 | 24.576217 | C | 39.052885 | 5.208143 | 23.160384 |
| C  | 18.267660 | 4.339912 | 23.743957 | C | 40.412770 | 4.916459 | 23.243236 |
| C  | 14.301000 | 5.801000 | 25.782000 | C | 40.923900 | 4.237242 | 24.357851 |
| C  | 13.829000 | 6.909000 | 26.476000 | O | 41.267492 | 5.275409 | 22.206798 |
| C  | 27.956207 | 7.032197 | 26.505965 | O | 36.028958 | 5.413074 | 26.202683 |
| C  | 27.120978 | 6.194168 | 25.775136 | O | 35.510847 | 3.260445 | 26.637283 |
| C  | 27.631757 | 5.081004 | 25.076105 | C | 36.365085 | 4.192834 | 26.421274 |
| C  | 29.026575 | 4.816167 | 25.131071 | C | 33.846854 | 4.021972 | 22.293718 |
| C  | 13.900000 | 3.935000 | 24.313000 | C | 34.612831 | 2.940969 | 21.873683 |
| C  | 28.703912 | 2.946048 | 23.616103 | C | 34.701781 | 2.637978 | 20.519678 |
| C  | 27.336646 | 3.163299 | 23.592046 | C | 34.024753 | 3.416989 | 19.587708 |
| C  | 26.775183 | 4.235322 | 24.322233 | C | 33.259776 | 4.496991 | 20.007741 |
| O  | 26.571630 | 2.272218 | 22.842322 | C | 33.170826 | 4.799983 | 21.361747 |
| O  | 16.595625 | 6.409533 | 25.840243 | C | 32.403848 | 5.880986 | 21.783781 |
| O  | 16.060871 | 4.270955 | 26.319640 | C | 31.727821 | 6.658997 | 20.849810 |
| C  | 15.737715 | 5.466436 | 25.980565 | C | 31.817771 | 6.355005 | 19.496805 |
| C  | 17.917761 | 5.856229 | 30.218759 | C | 32.583748 | 5.274002 | 19.075771 |
| C  | 18.909843 | 6.621169 | 30.858682 | O | 31.143743 | 7.185016 | 18.538835 |
| C  | 16.766136 | 5.452020 | 30.950082 | O | 34.116988 | 5.496104 | 24.161846 |
| C  | 15.689591 | 4.782581 | 30.329903 | O | 33.609987 | 3.336919 | 24.568199 |
| C  | 14.582923 | 4.385399 | 31.074233 | C | 33.846807 | 4.307023 | 23.760581 |
| O  | 18.434937 | 6.427667 | 27.962775 | C | 29.866107 | 5.644536 | 25.926558 |
| O  | 17.905256 | 4.284243 | 28.428683 | C | 29.315867 | 6.761068 | 26.581023 |
| C  | 18.102646 | 5.501028 | 28.786111 | C | 43.530396 | 6.838114 | 26.562617 |
| Cu | 34.126310 | 5.987200 | 26.089034 | C | 42.711717 | 5.967643 | 25.854309 |
| Cu | 33.551789 | 3.584558 | 26.543220 | C | 43.243398 | 4.851571 | 25.175566 |
| C  | 37.810428 | 3.836259 | 26.412284 | C | 44.644427 | 4.613480 | 25.232646 |
| C  | 38.326233 | 3.092758 | 27.489711 | C | 29.549001 | 3.754989 | 24.364516 |
| C  | 39.671868 | 2.753213 | 27.544445 | C | 44.345413 | 2.683258 | 23.790816 |
| C  | 40.526980 | 3.141906 | 26.519435 | C | 42.976220 | 2.891150 | 23.744994 |
| C  | 40.050108 | 3.862470 | 25.408047 | C | 42.400202 | 3.981432 | 24.434854 |

|    |           |          |           |    |           |          |           |
|----|-----------|----------|-----------|----|-----------|----------|-----------|
| O  | 42.223734 | 1.973309 | 23.015316 | C  | 48.790737 | 4.799893 | 21.361200 |
| O  | 32.160923 | 6.305968 | 25.990791 | C  | 48.023772 | 5.880897 | 21.783251 |
| O  | 31.655912 | 4.144013 | 26.387837 | C  | 47.347731 | 6.658913 | 20.849295 |
| C  | 31.313109 | 5.349246 | 26.112288 | C  | 47.437655 | 6.354926 | 19.496287 |
| C  | 33.679966 | 5.584291 | 30.321158 | C  | 48.203620 | 5.273922 | 19.075235 |
| C  | 34.757805 | 6.253428 | 30.928931 | O  | 46.763613 | 7.184943 | 18.538331 |
| C  | 32.543840 | 5.236848 | 31.104830 | O  | 49.726340 | 5.586859 | 24.092610 |
| C  | 31.404135 | 4.637213 | 30.530862 | O  | 49.389029 | 3.418936 | 24.606680 |
| C  | 30.302143 | 4.321856 | 31.321453 | C  | 49.524183 | 4.364848 | 23.750152 |
| O  | 34.070108 | 6.238227 | 28.063068 | C  | 45.473344 | 5.496586 | 25.978679 |
| O  | 33.526563 | 4.086122 | 28.468262 | C  | 44.897351 | 6.609138 | 26.619150 |
| C  | 33.764130 | 5.283785 | 28.864875 | C  | 45.180618 | 3.528702 | 24.511449 |
| Cu | 49.687381 | 6.194920 | 25.986368 | O  | 47.705792 | 6.316031 | 25.888199 |
| Cu | 49.348200 | 3.774899 | 26.563795 | O  | 47.397066 | 4.146344 | 26.421180 |
| C  | 53.571003 | 4.464792 | 26.367939 | C  | 46.945049 | 5.304226 | 26.098019 |
| C  | 54.157058 | 3.947774 | 27.515902 | C  | 49.185355 | 5.978101 | 30.217883 |
| C  | 55.530059 | 3.732759 | 27.559826 | C  | 50.110001 | 6.846905 | 30.825531 |
| C  | 56.316002 | 4.036762 | 26.454787 | C  | 48.082109 | 5.491956 | 30.973995 |
| C  | 55.729946 | 4.554780 | 25.305823 | C  | 47.068066 | 4.705994 | 30.386182 |
| C  | 54.356947 | 4.768795 | 25.262899 | C  | 46.006871 | 4.234803 | 31.152881 |
| C  | 53.770890 | 5.287813 | 24.113936 | O  | 49.595835 | 6.551878 | 27.940744 |
| C  | 54.557834 | 5.591815 | 23.007897 | O  | 49.299014 | 4.375419 | 28.456572 |
| C  | 55.929834 | 5.377800 | 23.052821 | C  | 49.379189 | 5.612948 | 28.788233 |
| C  | 56.515889 | 4.858782 | 24.200784 | C  | 11.158286 | 7.260970 | 41.959133 |
| O  | 56.643771 | 5.617805 | 21.841785 | C  | 10.287269 | 6.502976 | 41.186145 |
| O  | 51.632356 | 5.833805 | 26.124940 | C  | 10.757253 | 5.394976 | 40.491133 |
| O  | 51.338020 | 3.655033 | 26.633752 | C  | 12.099253 | 5.042971 | 40.571108 |
| C  | 52.092332 | 4.663762 | 26.380332 | C  | 11.698221 | 3.178978 | 39.103109 |
| C  | 49.466779 | 4.021876 | 22.293156 | C  | 10.356221 | 3.528983 | 39.024134 |
| C  | 50.232745 | 2.940872 | 21.873104 | C  | 9.886237  | 4.637982 | 39.718146 |
| C  | 50.321669 | 2.637885 | 20.519096 | O  | 9.453204  | 2.792989 | 38.218147 |
| C  | 49.644627 | 3.416901 | 19.587140 | Cu | 17.238250 | 6.144506 | 41.487977 |
| C  | 48.879661 | 4.496905 | 20.007192 | Cu | 16.685958 | 3.745008 | 41.980649 |

|   |           |          |           |    |           |          |           |
|---|-----------|----------|-----------|----|-----------|----------|-----------|
| C | 20.953443 | 4.060853 | 41.900959 | C  | 27.834802 | 4.730012 | 41.021433 |
| C | 21.445223 | 3.295529 | 42.974305 | C  | 12.571237 | 3.934972 | 39.877096 |
| C | 22.793830 | 2.977610 | 43.068240 | C  | 27.541034 | 2.966359 | 39.378079 |
| C | 23.678262 | 3.406879 | 42.085480 | C  | 26.152450 | 3.256672 | 39.287845 |
| C | 23.231855 | 4.154137 | 40.980045 | C  | 25.585970 | 4.272205 | 40.055579 |
| C | 21.849956 | 4.476505 | 40.874940 | O  | 25.494399 | 2.439809 | 38.411226 |
| C | 21.397685 | 5.166159 | 39.731351 | O  | 15.273255 | 6.435570 | 41.361506 |
| C | 22.296788 | 5.556192 | 38.743161 | O  | 14.774818 | 4.283092 | 41.808690 |
| C | 23.655036 | 5.272662 | 38.861409 | C  | 14.425755 | 5.481886 | 41.506768 |
| C | 24.133517 | 4.564973 | 39.969602 | C  | 16.702715 | 5.831146 | 45.712463 |
| O | 24.534096 | 5.652970 | 37.855413 | C  | 17.713110 | 6.591735 | 46.329516 |
| O | 19.147040 | 5.603527 | 41.634548 | C  | 18.806701 | 6.939091 | 32.206607 |
| O | 18.653556 | 3.450163 | 42.089667 | C  | 17.708858 | 6.502278 | 32.939587 |
| C | 19.499042 | 4.392228 | 41.873887 | C  | 16.677423 | 5.759050 | 32.333572 |
| C | 16.899511 | 4.145258 | 37.734453 | C  | 15.568748 | 5.429531 | 46.472817 |
| C | 17.601230 | 3.040879 | 37.219520 | C  | 14.483839 | 4.746711 | 45.883478 |
| C | 17.613679 | 2.778225 | 35.856494 | C  | 13.390784 | 4.361319 | 46.653677 |
| C | 16.923257 | 3.611817 | 34.983605 | C  | 14.518274 | 4.636774 | 32.442379 |
| C | 16.180920 | 4.713804 | 35.457279 | C  | 15.553570 | 5.331175 | 33.082485 |
| C | 16.149545 | 4.971859 | 36.853511 | O  | 13.408543 | 4.230460 | 33.174940 |
| C | 15.345288 | 6.024759 | 37.334322 | O  | 17.153237 | 6.438814 | 43.452917 |
| C | 14.634411 | 6.826093 | 36.450112 | O  | 16.646014 | 4.285245 | 43.893553 |
| C | 14.690586 | 6.612802 | 35.082957 | C  | 16.846064 | 5.496846 | 44.268428 |
| C | 15.470091 | 5.555605 | 34.561398 | Cu | 32.932179 | 6.127311 | 41.585165 |
| O | 13.974650 | 7.496688 | 34.278418 | Cu | 32.420283 | 3.665814 | 42.252521 |
| O | 17.247008 | 5.613406 | 39.576156 | C  | 36.607821 | 4.013075 | 41.741041 |
| O | 16.752861 | 3.455855 | 40.012386 | C  | 37.128529 | 3.170998 | 42.706856 |
| C | 16.972908 | 4.419386 | 39.193754 | C  | 38.507970 | 2.870573 | 42.714338 |
| C | 12.972270 | 5.800966 | 41.346096 | C  | 39.342550 | 3.393840 | 41.750374 |
| C | 12.500286 | 6.908965 | 42.040108 | C  | 38.848170 | 4.238928 | 40.703609 |
| C | 26.791182 | 6.874167 | 42.538323 | C  | 37.439724 | 4.545786 | 40.701694 |
| C | 25.952682 | 6.135142 | 41.728368 | C  | 36.918297 | 5.333091 | 39.634973 |
| C | 26.431519 | 5.043529 | 40.931598 | C  | 37.741271 | 5.809345 | 38.642332 |

|   |           |          |           |    |           |          |           |
|---|-----------|----------|-----------|----|-----------|----------|-----------|
| C | 39.138687 | 5.551206 | 38.660834 | C  | 30.136787 | 5.237077 | 41.961033 |
| C | 39.695579 | 4.771510 | 39.672750 | C  | 32.422747 | 5.983127 | 45.791183 |
| O | 39.935305 | 6.063311 | 37.681396 | C  | 33.293383 | 6.877113 | 46.387198 |
| O | 34.830659 | 5.571220 | 41.687303 | C  | 34.749556 | 6.534389 | 32.288800 |
| O | 34.359537 | 3.402079 | 42.083045 | C  | 33.655463 | 6.170745 | 33.065534 |
| C | 35.153774 | 4.356823 | 41.836129 | C  | 32.537031 | 5.534830 | 32.495232 |
| C | 32.197823 | 3.843975 | 38.044160 | C  | 31.291940 | 5.466349 | 46.505328 |
| C | 32.476637 | 2.550289 | 37.633444 | C  | 30.306620 | 4.648065 | 45.881421 |
| C | 32.429067 | 2.217844 | 36.264357 | C  | 29.215901 | 4.199286 | 46.584961 |
| C | 32.092602 | 3.171787 | 35.326630 | C  | 30.300812 | 4.596505 | 32.687368 |
| C | 31.745770 | 4.511190 | 35.696415 | C  | 31.408050 | 5.209656 | 33.282074 |
| C | 31.788746 | 4.845624 | 37.098335 | O  | 29.189964 | 4.283820 | 33.460069 |
| C | 31.384488 | 6.155821 | 37.491871 | O  | 32.934268 | 6.511297 | 43.549245 |
| C | 30.991933 | 7.082484 | 36.560973 | O  | 32.615657 | 4.350620 | 44.095330 |
| C | 30.990384 | 6.776517 | 35.174232 | C  | 32.678328 | 5.582609 | 44.371730 |
| C | 31.364258 | 5.510845 | 34.732415 | Cu | 48.451353 | 6.404301 | 41.573756 |
| O | 30.602108 | 7.827733 | 34.389990 | Cu | 47.998449 | 3.978766 | 42.047612 |
| O | 32.846551 | 5.307348 | 39.782158 | C  | 52.242278 | 4.464620 | 41.931334 |
| O | 32.142968 | 3.247195 | 40.336703 | C  | 52.828353 | 3.947597 | 43.079285 |
| C | 32.401064 | 4.158957 | 39.492371 | C  | 54.201353 | 3.732577 | 43.123183 |
| C | 28.672783 | 5.519319 | 41.869946 | C  | 54.987278 | 4.036581 | 42.018131 |
| C | 28.169512 | 6.578987 | 42.601170 | C  | 54.401203 | 4.554604 | 40.869180 |
| C | 42.282457 | 7.206410 | 42.068224 | C  | 53.028203 | 4.768624 | 40.826281 |
| C | 41.465250 | 6.409624 | 41.275173 | C  | 52.442128 | 5.287648 | 39.677330 |
| C | 41.996081 | 5.350121 | 40.512769 | C  | 53.229054 | 5.591652 | 38.571278 |
| C | 43.392410 | 5.089460 | 40.573136 | C  | 54.601054 | 5.377632 | 38.616177 |
| C | 28.358074 | 3.673303 | 40.221409 | C  | 55.187129 | 4.858609 | 39.764128 |
| C | 43.097067 | 3.304451 | 38.955828 | O  | 55.314970 | 5.617639 | 37.405129 |
| C | 41.730132 | 3.526159 | 38.914782 | O  | 50.375134 | 5.934729 | 41.729163 |
| C | 41.160287 | 4.554246 | 39.691961 | O  | 49.973361 | 3.761190 | 42.185667 |
| O | 40.975892 | 2.680463 | 38.106088 | C  | 50.776091 | 4.736728 | 41.959867 |
| O | 30.921104 | 6.174521 | 41.639619 | C  | 48.304136 | 4.389376 | 37.810888 |
| O | 30.496317 | 4.088854 | 42.358931 | C  | 49.127935 | 3.358473 | 37.325349 |



|   |           |          |           |    |           |          |           |
|---|-----------|----------|-----------|----|-----------|----------|-----------|
| C | 49.194193 | 3.080256 | 35.967218 | C  | 8.959816  | 6.502907 | 56.749315 |
| C | 48.434881 | 3.822889 | 35.070004 | C  | 9.429783  | 5.394908 | 56.054291 |
| C | 47.577413 | 4.851848 | 35.512945 | C  | 10.771783 | 5.042898 | 56.134241 |
| C | 47.498951 | 5.129879 | 36.903846 | C  | 10.370718 | 3.178911 | 54.666243 |
| C | 46.595417 | 6.112902 | 37.353867 | C  | 9.028718  | 3.528920 | 54.587293 |
| C | 45.823951 | 6.825744 | 36.444946 | C  | 8.558750  | 4.637919 | 55.281317 |
| C | 45.914786 | 6.588728 | 35.083146 | O  | 8.125684  | 2.792932 | 53.781319 |
| C | 46.797132 | 5.599655 | 34.591980 | Cu | 15.891522 | 6.155334 | 57.135290 |
| O | 45.128147 | 7.383745 | 34.252268 | Cu | 15.352118 | 3.737379 | 57.544434 |
| O | 48.497783 | 5.881555 | 39.657128 | C  | 19.606139 | 4.079052 | 57.412957 |
| O | 48.118689 | 3.698481 | 40.082379 | C  | 20.169417 | 3.302784 | 58.441645 |
| C | 48.307345 | 4.672820 | 39.269370 | C  | 21.524003 | 2.994493 | 58.442266 |
| C | 44.216457 | 5.884090 | 41.416608 | C  | 22.339706 | 3.448919 | 57.411476 |
| C | 43.644709 | 6.949596 | 42.135216 | C  | 21.814518 | 4.206837 | 56.347207 |
| C | 43.929984 | 4.068068 | 39.765945 | C  | 20.427205 | 4.511822 | 56.333763 |
| O | 46.479669 | 6.622603 | 41.444818 | C  | 19.892913 | 5.206384 | 55.227518 |
| O | 46.070998 | 4.439867 | 41.841807 | C  | 20.720276 | 5.624407 | 54.189930 |
| C | 45.675008 | 5.631729 | 41.572621 | C  | 22.088438 | 5.367379 | 54.222861 |
| C | 47.843729 | 6.057421 | 45.781282 | C  | 22.647293 | 4.649394 | 55.289004 |
| C | 48.785679 | 6.887232 | 46.417225 | O  | 22.903312 | 5.792369 | 53.179590 |
| C | 49.988532 | 7.195259 | 32.164653 | O  | 17.796353 | 5.623539 | 57.297908 |
| C | 48.938669 | 6.686084 | 32.921068 | O  | 17.318956 | 3.448123 | 57.660625 |
| C | 47.974479 | 5.834587 | 32.348227 | C  | 18.155017 | 4.403510 | 57.470893 |
| C | 46.720928 | 5.584278 | 46.517299 | C  | 15.687578 | 4.242123 | 53.318160 |
| C | 45.690402 | 4.839643 | 45.905090 | C  | 16.418874 | 3.147111 | 52.823636 |
| C | 44.612674 | 4.377822 | 46.654628 | C  | 16.471812 | 2.881015 | 51.462663 |
| C | 45.926480 | 4.526204 | 32.512090 | C  | 15.788830 | 3.698571 | 50.569936 |
| C | 46.897354 | 5.333352 | 33.120374 | C  | 15.023693 | 4.794753 | 51.019639 |
| O | 44.863598 | 4.043889 | 33.267506 | C  | 14.960636 | 5.063985 | 52.413830 |
| O | 48.337104 | 6.684857 | 43.537426 | C  | 14.145010 | 6.119266 | 52.868151 |
| O | 47.900298 | 4.512357 | 43.960543 | C  | 13.451891 | 6.911347 | 51.961506 |
| C | 48.042940 | 5.730098 | 44.342372 | C  | 13.530613 | 6.680860 | 50.597910 |
| C | 9.830848  | 7.260896 | 57.522290 | C  | 14.317809 | 5.616956 | 50.101782 |

|    |           |          |           |    |           |          |           |
|----|-----------|----------|-----------|----|-----------|----------|-----------|
| O  | 12.825683 | 7.552960 | 49.770980 | Cu | 30.949634 | 3.749534 | 57.533970 |
| O  | 15.948098 | 5.679682 | 55.205198 | C  | 35.196960 | 4.101980 | 57.427724 |
| O  | 15.451326 | 3.509931 | 55.571706 | C  | 35.734129 | 3.349155 | 58.488031 |
| C  | 15.694991 | 4.493172 | 54.784355 | C  | 37.080459 | 3.009437 | 58.512937 |
| C  | 11.644816 | 5.800887 | 56.909216 | C  | 37.914730 | 3.406396 | 57.474164 |
| C  | 11.172849 | 6.908886 | 57.603240 | C  | 37.417613 | 4.142454 | 56.381571 |
| C  | 25.305491 | 7.115481 | 57.593251 | C  | 36.038544 | 4.484353 | 56.346321 |
| C  | 24.472279 | 6.308731 | 56.827083 | C  | 35.532607 | 5.163004 | 55.218113 |
| C  | 24.983977 | 5.222865 | 56.086761 | C  | 36.379735 | 5.525216 | 54.175141 |
| C  | 26.378961 | 4.955324 | 56.132828 | C  | 37.740100 | 5.229636 | 54.226568 |
| C  | 11.243751 | 3.934900 | 55.440217 | C  | 38.271473 | 4.529373 | 55.318590 |
| C  | 26.056834 | 3.146973 | 54.545614 | O  | 38.575038 | 5.603265 | 53.179625 |
| C  | 24.689444 | 3.367450 | 54.526486 | O  | 33.380608 | 5.645637 | 57.257414 |
| C  | 24.127015 | 4.407257 | 55.301345 | O  | 32.913254 | 3.472765 | 57.647288 |
| O  | 23.924685 | 2.507377 | 53.741167 | C  | 33.745062 | 4.429187 | 57.451881 |
| O  | 13.936013 | 6.439336 | 56.974158 | C  | 31.277411 | 4.265404 | 53.305162 |
| O  | 13.441968 | 4.274243 | 57.363446 | C  | 32.080221 | 3.217713 | 52.819404 |
| C  | 13.093013 | 5.478540 | 57.082763 | C  | 32.163922 | 2.954074 | 51.459439 |
| C  | 15.283046 | 5.695821 | 61.352095 | C  | 31.439582 | 3.725071 | 50.558135 |
| C  | 16.314087 | 6.385804 | 61.978046 | C  | 30.599642 | 4.767712 | 50.998096 |
| C  | 17.640265 | 6.917722 | 47.677373 | C  | 30.508812 | 5.037919 | 52.391012 |
| C  | 16.552075 | 6.498336 | 48.433801 | C  | 29.628915 | 6.044961 | 52.833033 |
| C  | 15.505535 | 5.755631 | 47.854498 | C  | 28.885628 | 6.778530 | 51.914183 |
| C  | 14.198081 | 5.242825 | 62.095148 | C  | 28.983003 | 6.539973 | 50.552581 |
| C  | 13.166040 | 4.552842 | 61.469196 | C  | 29.846230 | 5.534117 | 50.075022 |
| C  | 12.083075 | 4.099846 | 62.213249 | O  | 28.219999 | 7.345509 | 49.711536 |
| C  | 13.345678 | 4.642201 | 48.017051 | O  | 31.485947 | 5.712570 | 55.192979 |
| C  | 14.390423 | 5.348848 | 48.628158 | O  | 31.045828 | 3.530435 | 55.558667 |
| O  | 12.246050 | 4.252167 | 48.773486 | C  | 31.264397 | 4.519981 | 54.771534 |
| O  | 15.754589 | 6.387479 | 59.110258 | C  | 27.217349 | 5.754617 | 56.957700 |
| O  | 15.284268 | 4.211934 | 59.472401 | C  | 26.664535 | 6.841917 | 57.658102 |
| C  | 15.446195 | 5.415018 | 59.890971 | C  | 40.919690 | 6.964412 | 57.659376 |
| Cu | 31.463903 | 6.174286 | 57.130653 | C  | 40.090252 | 6.158056 | 56.891158 |

|    |           |          |           |   |           |          |           |
|----|-----------|----------|-----------|---|-----------|----------|-----------|
| C  | 40.604860 | 5.074970 | 56.148496 | C | 51.901549 | 5.591433 | 54.133681 |
| C  | 42.001769 | 4.810587 | 56.192851 | C | 53.273549 | 5.377407 | 54.178555 |
| C  | 26.901752 | 3.922815 | 55.329273 | C | 53.859642 | 4.858378 | 55.326493 |
| C  | 41.677328 | 2.989238 | 54.621977 | O | 53.987445 | 5.617415 | 52.967495 |
| C  | 40.310435 | 3.214753 | 54.595073 | O | 48.995154 | 5.863872 | 57.303430 |
| C  | 39.748177 | 4.262802 | 55.358949 | O | 48.671314 | 3.659467 | 57.665666 |
| O  | 39.545715 | 2.350364 | 53.814639 | C | 49.438696 | 4.675517 | 57.498128 |
| O  | 29.497139 | 6.448322 | 57.017112 | C | 46.976219 | 4.387862 | 53.312763 |
| O  | 29.037956 | 4.267274 | 57.363193 | C | 47.814338 | 3.383025 | 52.797313 |
| C  | 28.669601 | 5.472829 | 57.119907 | C | 47.871936 | 3.133393 | 51.433674 |
| C  | 30.903120 | 5.695641 | 61.351269 | C | 47.089466 | 3.878803 | 50.559757 |
| C  | 31.934175 | 6.385618 | 61.977205 | C | 46.220531 | 4.885378 | 51.031219 |
| C  | 33.115304 | 7.239235 | 47.740611 | C | 46.151263 | 5.134491 | 52.428401 |
| C  | 32.066876 | 6.721432 | 48.471264 | C | 45.235352 | 6.092407 | 52.906168 |
| C  | 31.109922 | 5.828549 | 47.887734 | C | 44.444823 | 6.811264 | 52.018520 |
| C  | 29.818167 | 5.242646 | 62.094340 | C | 44.526305 | 6.603282 | 50.651372 |
| C  | 28.786113 | 4.552669 | 61.468405 | C | 45.419405 | 5.638222 | 50.131841 |
| C  | 27.703159 | 4.099675 | 62.212476 | O | 43.722357 | 7.405826 | 49.844686 |
| C  | 29.056891 | 4.503162 | 47.963631 | O | 47.127066 | 5.819006 | 55.215411 |
| C  | 29.987639 | 5.307894 | 48.618504 | O | 46.816133 | 3.610217 | 55.554876 |
| O  | 27.987963 | 4.007364 | 48.646322 | C | 46.972439 | 4.620725 | 54.780567 |
| O  | 31.364873 | 6.394423 | 59.109265 | C | 42.840918 | 5.624034 | 57.003065 |
| O  | 30.889773 | 4.218924 | 59.464405 | C | 42.280310 | 6.702261 | 57.713121 |
| C  | 31.059477 | 5.419578 | 59.887835 | C | 42.523728 | 3.772130 | 55.397558 |
| Cu | 47.055651 | 6.260771 | 57.153125 | O | 45.082212 | 6.414828 | 57.026493 |
| Cu | 46.686572 | 3.803902 | 57.527529 | O | 44.742469 | 4.207977 | 57.344661 |
| C  | 50.914829 | 4.464394 | 57.493750 | C | 44.307878 | 5.397128 | 57.124541 |
| C  | 51.500923 | 3.947364 | 58.641689 | C | 46.523195 | 5.695406 | 61.350162 |
| C  | 52.873923 | 3.732339 | 58.685563 | C | 47.554262 | 6.385378 | 61.976082 |
| C  | 53.659830 | 4.036343 | 57.580498 | C | 48.661418 | 7.210315 | 47.761676 |
| C  | 53.073736 | 4.554373 | 56.431559 | C | 47.591475 | 6.714339 | 48.496981 |
| C  | 51.700736 | 4.768398 | 56.388685 | C | 46.611011 | 5.899901 | 47.898233 |
| C  | 51.114643 | 5.287428 | 55.239746 | C | 45.438253 | 5.242413 | 62.093251 |

|   |           |          |           |   |           |          |           |
|---|-----------|----------|-----------|---|-----------|----------|-----------|
| C | 44.406185 | 4.552442 | 61.467332 | H | 21.487785 | 5.249430 | 24.044641 |
| C | 43.323243 | 4.099449 | 62.211421 | H | 22.971879 | 5.937283 | 22.267790 |
| C | 44.531205 | 4.638665 | 48.020107 | H | 19.532717 | 2.330044 | 22.589896 |
| C | 45.517142 | 5.408043 | 48.652918 | H | 19.679477 | 1.794178 | 20.190515 |
| O | 43.451858 | 4.165480 | 48.757601 | H | 18.480499 | 3.170813 | 18.536728 |
| O | 46.924761 | 6.447470 | 59.126507 | H | 16.649980 | 6.144787 | 22.827018 |
| O | 46.571188 | 4.243086 | 59.457644 | H | 15.506631 | 7.500795 | 21.165206 |
| C | 46.675333 | 5.446344 | 59.890404 | H | 14.495691 | 7.508802 | 27.086848 |
| C | 16.262162 | 6.620790 | 63.347051 | H | 27.544390 | 7.892515 | 27.024129 |
| C | 15.179196 | 6.168795 | 64.090104 | H | 26.067709 | 6.434857 | 25.745019 |
| C | 14.147156 | 5.478812 | 63.465153 | H | 14.941446 | 3.633620 | 24.312812 |
| C | 12.031150 | 4.336833 | 63.582254 | H | 29.112826 | 2.128754 | 23.037196 |
| C | 13.063191 | 5.025817 | 64.207206 | H | 19.776906 | 6.959637 | 30.302797 |
| O | 10.943187 | 3.908837 | 64.361307 | H | 15.678100 | 4.569578 | 29.266264 |
| C | 31.882275 | 6.620600 | 63.346211 | H | 13.771745 | 3.871103 | 30.576881 |
| C | 30.799322 | 6.168606 | 64.089282 | H | 15.671866 | 6.861099 | 17.596378 |
| C | 29.767267 | 5.478629 | 63.464346 | H | 25.094740 | 6.080172 | 21.433310 |
| C | 27.651260 | 4.336658 | 63.581482 | H | 25.588912 | 2.485300 | 22.858991 |
| C | 28.683314 | 5.025635 | 64.206417 | H | 37.673078 | 2.784603 | 28.298330 |
| O | 26.563309 | 3.908663 | 64.360554 | H | 40.055700 | 2.186978 | 28.387465 |
| C | 47.502389 | 6.620356 | 63.345091 | H | 41.569179 | 2.861991 | 26.594490 |
| C | 46.419447 | 6.168363 | 64.088179 | H | 37.136923 | 5.109780 | 24.071672 |
| C | 45.387379 | 5.478391 | 63.463260 | H | 38.657766 | 5.715916 | 22.290953 |
| C | 43.271369 | 4.336426 | 63.580429 | H | 35.146104 | 2.325240 | 22.590313 |
| C | 44.303437 | 5.025398 | 64.205349 | H | 35.297709 | 1.792927 | 20.190421 |
| O | 42.183431 | 3.908432 | 64.359519 | H | 34.099756 | 3.170442 | 18.536518 |
| H | 12.119292 | 8.127223 | 26.935541 | H | 32.269117 | 6.145226 | 22.826304 |
| H | 10.573036 | 6.786857 | 25.566326 | H | 31.125577 | 7.500075 | 21.165083 |
| H | 13.383710 | 2.323187 | 22.982608 | H | 29.951149 | 7.414422 | 27.168037 |
| H | 9.847384  | 3.169534 | 22.677183 | H | 43.101768 | 7.697636 | 27.068403 |
| H | 22.128855 | 2.878336 | 28.234723 | H | 41.653339 | 6.184394 | 25.829323 |
| H | 24.524568 | 2.323825 | 28.277132 | H | 30.610683 | 3.541548 | 24.316365 |
| H | 26.001623 | 3.075333 | 26.483803 | H | 44.764150 | 1.847360 | 23.246573 |

|   |           |          |           |   |           |          |           |
|---|-----------|----------|-----------|---|-----------|----------|-----------|
| H | 35.618886 | 6.544135 | 30.337422 | H | 18.165768 | 1.926271 | 35.472286 |
| H | 31.343147 | 4.414637 | 29.469908 | H | 16.958184 | 3.375320 | 33.929601 |
| H | 29.439700 | 3.860781 | 30.858716 | H | 15.240148 | 6.237771 | 38.392000 |
| H | 31.291693 | 6.860811 | 17.596363 | H | 14.023748 | 7.635428 | 36.827431 |
| H | 40.793345 | 5.790108 | 21.479982 | H | 13.169313 | 7.511492 | 42.645374 |
| H | 41.239475 | 2.180964 | 23.018429 | H | 26.396714 | 7.704135 | 43.132981 |
| H | 53.552011 | 3.699701 | 28.381160 | H | 24.892876 | 6.408004 | 41.696563 |
| H | 55.987694 | 3.325991 | 28.455688 | H | 13.612084 | 3.634289 | 39.867747 |
| H | 57.384069 | 3.866316 | 26.497848 | H | 27.933432 | 2.162732 | 38.749412 |
| H | 52.703450 | 5.452774 | 24.015157 | H | 18.569613 | 6.924724 | 45.754180 |
| H | 54.081129 | 5.976133 | 22.116856 | H | 19.585040 | 7.522457 | 32.688588 |
| H | 50.777290 | 2.334582 | 22.589267 | H | 17.663033 | 6.764077 | 33.988093 |
| H | 50.920785 | 1.795180 | 20.189773 | H | 14.456045 | 4.511393 | 44.824975 |
| H | 49.720358 | 3.170933 | 18.535926 | H | 12.573515 | 3.834708 | 46.179744 |
| H | 47.862763 | 6.134480 | 22.823774 | H | 12.749227 | 3.710299 | 32.615608 |
| H | 46.741177 | 7.496787 | 21.164899 | H | 14.034985 | 7.274631 | 33.299417 |
| H | 45.521778 | 7.300979 | 27.173038 | H | 24.084777 | 6.200632 | 37.136190 |
| H | 46.244308 | 3.321880 | 24.481606 | H | 24.560908 | 2.677904 | 38.303713 |
| H | 50.937041 | 7.247183 | 30.250249 | H | 36.463121 | 2.757711 | 43.469068 |
| H | 47.070039 | 4.455635 | 29.330869 | H | 38.916422 | 2.218605 | 43.492934 |
| H | 45.243476 | 3.631840 | 30.680101 | H | 40.406936 | 3.141905 | 41.786961 |
| H | 46.913204 | 6.861936 | 17.595746 | H | 35.850234 | 5.552248 | 39.594788 |
| H | 56.056144 | 5.976916 | 21.104057 | H | 37.318859 | 6.403114 | 37.822523 |
| H | 10.790976 | 8.128083 | 42.498432 | H | 32.758413 | 1.805389 | 38.381304 |
| H | 9.244443  | 6.787065 | 41.130005 | H | 32.673317 | 1.200342 | 35.943357 |
| H | 12.055519 | 2.325066 | 38.544075 | H | 32.084660 | 2.878167 | 34.272063 |
| H | 8.519278  | 3.170935 | 38.240000 | H | 31.384089 | 6.424628 | 38.546901 |
| H | 20.770376 | 2.953700 | 43.751062 | H | 30.670725 | 8.084076 | 36.860271 |
| H | 23.157589 | 2.394848 | 43.908935 | H | 28.832680 | 7.176160 | 43.229277 |
| H | 24.721539 | 3.137374 | 42.190245 | H | 41.855562 | 8.027251 | 42.635993 |
| H | 20.349332 | 5.398995 | 39.575118 | H | 40.408878 | 6.641785 | 41.248934 |
| H | 21.924656 | 6.082910 | 37.874542 | H | 29.419300 | 3.420240 | 40.275445 |
| H | 18.152750 | 2.388272 | 37.886631 | H | 43.516743 | 2.517995 | 38.342242 |

|   |           |          |           |   |           |          |           |
|---|-----------|----------|-----------|---|-----------|----------|-----------|
| H | 34.124896 | 7.284059 | 45.805712 | H | 19.546867 | 2.944509 | 59.253514 |
| H | 35.597364 | 7.035897 | 32.745155 | H | 21.945941 | 2.401007 | 59.247280 |
| H | 33.686526 | 6.399718 | 34.123299 | H | 23.389597 | 3.190561 | 57.443891 |
| H | 30.403710 | 4.375521 | 44.830303 | H | 18.834307 | 5.425560 | 55.139833 |
| H | 28.459762 | 3.586512 | 46.080007 | H | 20.287161 | 6.157377 | 53.354275 |
| H | 28.473481 | 3.807963 | 32.931790 | H | 16.958459 | 2.500826 | 53.506541 |
| H | 30.549859 | 7.595362 | 33.449733 | H | 17.045805 | 2.035745 | 51.096013 |
| H | 39.400334 | 6.584743 | 37.061327 | H | 15.851557 | 3.455999 | 49.518668 |
| H | 39.988635 | 2.885986 | 38.125797 | H | 14.019583 | 6.342893 | 53.921468 |
| H | 52.223991 | 3.710387 | 43.947918 | H | 12.834374 | 7.724776 | 52.318247 |
| H | 54.659345 | 3.328203 | 44.019913 | H | 11.840450 | 7.509607 | 58.212083 |
| H | 56.055412 | 3.866650 | 42.061230 | H | 24.893213 | 7.954395 | 58.144987 |
| H | 51.374685 | 5.452690 | 39.579208 | H | 23.419820 | 6.553045 | 56.802796 |
| H | 52.752229 | 5.975719 | 37.680067 | H | 12.285038 | 3.636243 | 55.427117 |
| H | 49.730733 | 2.775141 | 38.012136 | H | 26.465838 | 2.353649 | 53.934267 |
| H | 49.839076 | 2.285199 | 35.606290 | H | 17.168075 | 6.740032 | 61.410658 |
| H | 48.511046 | 3.573621 | 34.021224 | H | 18.432707 | 7.498032 | 48.139878 |
| H | 46.461430 | 6.338365 | 38.405927 | H | 16.527597 | 6.770590 | 49.480349 |
| H | 45.134243 | 7.580601 | 36.798354 | H | 13.130836 | 4.374522 | 60.400654 |
| H | 44.266979 | 7.578081 | 42.762289 | H | 11.278104 | 3.573997 | 61.719325 |
| H | 44.992662 | 3.850969 | 39.738280 | H | 11.577010 | 3.724193 | 48.233474 |
| H | 49.627670 | 7.279455 | 45.858211 | H | 12.919154 | 7.331415 | 48.794389 |
| H | 50.713735 | 7.861854 | 32.620936 | H | 22.396462 | 6.323929 | 52.487671 |
| H | 48.875268 | 6.976365 | 33.961186 | H | 22.944468 | 2.731769 | 53.751071 |
| H | 45.691475 | 4.615231 | 44.844110 | H | 35.095294 | 3.027806 | 59.302801 |
| H | 43.837034 | 3.805848 | 46.163547 | H | 37.480289 | 2.432389 | 59.340859 |
| H | 44.248710 | 3.450076 | 32.731348 | H | 38.956913 | 3.121122 | 57.523539 |
| H | 45.224024 | 7.150726 | 33.278671 | H | 34.481833 | 5.414363 | 55.119876 |
| H | 54.726531 | 5.972693 | 36.665929 | H | 35.969074 | 6.047131 | 53.321417 |
| H | 9.463399  | 8.127109 | 58.062853 | H | 32.652952 | 2.607315 | 53.508492 |
| H | 7.916946  | 6.786720 | 56.693530 | H | 32.793476 | 2.145999 | 51.099975 |
| H | 10.728169 | 2.325384 | 54.106726 | H | 31.527592 | 3.483826 | 49.507089 |
| H | 7.191740  | 3.170751 | 53.803257 | H | 29.492057 | 6.271848 | 53.885316 |

|   |           |          |           |   |           |           |           |
|---|-----------|----------|-----------|---|-----------|-----------|-----------|
| H | 28.211233 | 7.550381 | 52.261461 | H | 43.806724 | 7.190193  | 48.866223 |
| H | 27.298698 | 7.472282 | 58.271042 | H | 53.398692 | 5.970814  | 52.227674 |
| H | 40.504528 | 7.799350 | 58.215008 | H | 17.068201 | 7.158110  | 63.835991 |
| H | 39.037476 | 6.400209 | 56.869686 | H | 15.148083 | 6.357292  | 65.155550 |
| H | 27.963229 | 3.707903 | 55.279749 | H | 10.263157 | 3.421775  | 63.797076 |
| H | 42.085653 | 2.189801 | 54.018283 | H | 32.688068 | 7.158307  | 63.835060 |
| H | 32.787217 | 6.740914 | 61.409196 | H | 30.767941 | 6.357329  | 65.154661 |
| H | 33.817424 | 7.933123 | 48.213317 | H | 25.881862 | 3.424130  | 63.795740 |
| H | 31.960153 | 7.020767 | 49.518578 | H | 48.307513 | 7.159135  | 63.833759 |
| H | 28.748062 | 4.375542 | 60.400007 | H | 46.387765 | 6.357309  | 65.153493 |
| H | 26.897525 | 3.574889 | 61.718378 | H | 41.501220 | 3.425122  | 63.794463 |
| H | 27.451200 | 3.451790 | 48.057936 | H | 54.922556 | 4.682785  | 55.325779 |
| H | 28.292391 | 7.085807 | 48.739468 | H | 56.250097 | 4.683171  | 39.763700 |
| H | 38.089230 | 6.128903 | 52.468364 | H | 57.578892 | 4.683412  | 24.200625 |
| H | 38.565764 | 2.575991 | 53.822527 | H | 32.654232 | 5.043308  | 18.026530 |
| H | 50.894922 | 3.700529 | 59.506444 | H | 17.034810 | 5.043582  | 18.026682 |
| H | 53.331584 | 3.325647 | 59.581346 | H | 10.176547 | 4.915299  | 24.089643 |
| H | 54.727848 | 3.865728 | 57.623137 | H | 8.847999  | 4.915598  | 39.653310 |
| H | 50.047651 | 5.459410 | 55.145286 | H | 7.520561  | 4.915556  | 55.216444 |
| H | 51.424893 | 5.977051 | 53.243021 | H | 12.998950 | 5.198991  | 65.269024 |
| H | 48.430558 | 2.793083 | 53.466230 | H | 28.618759 | 5.198985  | 65.268152 |
| H | 48.525350 | 2.355945 | 51.050520 | H | 44.238629 | 5.198825  | 65.267036 |
| H | 47.156979 | 3.648561 | 49.506201 | H | 48.273990 | 5.043163  | 18.026055 |
| H | 45.105638 | 6.293333 | 53.963699 | C | 31.784209 | 8.965730  | 40.986375 |
| H | 43.746553 | 7.547705 | 52.393414 | C | 31.549297 | 9.257704  | 42.482529 |
| H | 42.912671 | 7.342219 | 58.318057 | C | 32.565751 | 10.299555 | 43.005129 |
| H | 43.584912 | 3.556439 | 55.349055 | C | 32.556105 | 11.579479 | 42.156702 |
| H | 48.405614 | 6.744907 | 61.407981 | C | 32.834566 | 11.270500 | 40.676436 |
| H | 49.399651 | 7.847671 | 48.238216 | C | 31.845086 | 10.230306 | 40.124822 |
| H | 47.526217 | 6.985589 | 49.541973 | O | 32.995076 | 8.190427  | 40.836636 |
| H | 44.381439 | 4.364306 | 60.399424 | C | 29.553236 | 9.558112  | 43.952943 |
| H | 42.519341 | 3.571630 | 61.717714 | C | 28.277752 | 10.139703 | 44.139612 |
| H | 42.826712 | 3.598181 | 48.204694 | C | 27.618403 | 10.044646 | 45.364646 |

|              |           |           |           |   |           |          |           |
|--------------|-----------|-----------|-----------|---|-----------|----------|-----------|
| C            | 28.203052 | 9.370033  | 46.445213 | C | 22.228265 | 4.003088 | 26.389201 |
| C            | 29.460960 | 8.786187  | 46.266366 | C | 22.763047 | 3.225299 | 27.432155 |
| C            | 30.133145 | 8.871427  | 45.043599 | C | 24.119380 | 2.927885 | 27.477528 |
| N            | 30.167670 | 9.637581  | 42.711270 | C | 24.966474 | 3.395532 | 26.478366 |
| H            | 32.340305 | 10.520713 | 44.062654 | C | 24.470809 | 4.150354 | 25.398301 |
| H            | 31.717145 | 8.304799  | 42.998534 | C | 23.081862 | 4.442418 | 25.337354 |
| H            | 30.993409 | 8.290254  | 40.636370 | C | 22.579760 | 5.129758 | 24.211259 |
| H            | 33.293131 | 12.305449 | 42.544441 | C | 23.439172 | 5.560413 | 23.205483 |
| H            | 31.564508 | 12.064499 | 42.247204 | C | 24.807283 | 5.315371 | 23.285212 |
| H            | 32.789126 | 12.191874 | 40.068750 | C | 25.334213 | 4.598597 | 24.367964 |
| H            | 33.872044 | 10.892442 | 40.570247 | O | 25.653503 | 5.746106 | 22.269284 |
| H            | 30.831301 | 10.674254 | 40.085680 | O | 20.435279 | 5.555770 | 26.184768 |
| H            | 32.099433 | 9.941567  | 39.089462 | O | 19.928313 | 3.407796 | 26.652593 |
| H            | 33.579480 | 9.850563  | 42.998684 | C | 20.778131 | 4.341825 | 26.417223 |
| H            | 27.803644 | 10.664901 | 43.302432 | C | 18.226927 | 4.022014 | 22.293999 |
| H            | 26.632672 | 10.509360 | 45.476593 | C | 18.992915 | 2.941012 | 21.873981 |
| H            | 27.688335 | 9.310627  | 47.409065 | C | 19.081890 | 2.638017 | 20.519979 |
| H            | 29.948162 | 8.252587  | 47.088630 | C | 18.404876 | 3.417023 | 19.587993 |
| H            | 31.108925 | 8.392313  | 44.948320 | C | 17.639888 | 4.497024 | 20.008011 |
| H            | 33.766798 | 8.698218  | 41.139702 | C | 17.550913 | 4.800019 | 21.362013 |
| H            | 29.758177 | 10.302918 | 42.065783 | C | 16.783924 | 5.881020 | 21.784030 |
| (R,R)-2-Int2 |           |           |           | C | 16.107910 | 6.659026 | 20.850045 |
| C            | 12.487000 | 7.261000  | 26.395000 | C | 16.197885 | 6.355031 | 19.497042 |
| C            | 11.616000 | 6.503000  | 25.622000 | C | 16.963875 | 5.274030 | 19.076025 |
| C            | 12.086000 | 5.395000  | 24.927000 | O | 15.523872 | 7.185037 | 18.539057 |
| C            | 13.428000 | 5.043000  | 25.007000 | O | 18.567269 | 5.538612 | 24.104762 |
| C            | 13.027000 | 3.179000  | 23.539000 | O | 18.034240 | 3.397557 | 24.577574 |
| C            | 11.685000 | 3.529000  | 23.460000 | C | 18.270582 | 4.342619 | 23.744333 |
| C            | 11.215000 | 4.638000  | 24.154000 | C | 14.301000 | 5.801000 | 25.782000 |
| O            | 10.782000 | 2.793000  | 22.654000 | C | 13.829000 | 6.909000 | 26.476000 |
| Cu           | 18.541625 | 6.107269  | 26.005391 | C | 28.029639 | 7.162013 | 26.527427 |
| Cu           | 17.962155 | 3.718468  | 26.529898 | C | 27.180829 | 6.314278 | 25.823543 |
|              |           |           |           | C | 27.677609 | 5.186382 | 25.138689 |



|    |           |          |           |   |           |          |           |
|----|-----------|----------|-----------|---|-----------|----------|-----------|
| C  | 29.071297 | 4.912981 | 25.184716 | C | 33.846854 | 4.021972 | 22.293718 |
| C  | 13.900000 | 3.935000 | 24.313000 | C | 34.612831 | 2.940969 | 21.873683 |
| C  | 28.719464 | 3.013514 | 23.712766 | C | 34.701781 | 2.637978 | 20.519678 |
| C  | 27.354347 | 3.242941 | 23.694605 | C | 34.024753 | 3.416989 | 19.587708 |
| C  | 26.808343 | 4.334154 | 24.407433 | C | 33.259776 | 4.496991 | 20.007741 |
| O  | 26.575596 | 2.347142 | 22.964713 | C | 33.170826 | 4.799983 | 21.361747 |
| O  | 16.593188 | 6.411731 | 25.837881 | C | 32.403848 | 5.880986 | 21.783781 |
| O  | 16.063321 | 4.272116 | 26.318279 | C | 31.727821 | 6.658997 | 20.849810 |
| C  | 15.737658 | 5.467200 | 25.979170 | C | 31.817771 | 6.355005 | 19.496805 |
| C  | 17.905774 | 5.857939 | 30.218855 | C | 32.583748 | 5.274002 | 19.075771 |
| C  | 18.903789 | 6.602800 | 30.872671 | O | 31.143743 | 7.185016 | 18.538835 |
| C  | 16.742626 | 5.464458 | 30.937303 | O | 34.146496 | 5.527849 | 24.129439 |
| C  | 15.663202 | 4.813570 | 30.302657 | O | 33.632400 | 3.381728 | 24.590629 |
| C  | 14.543288 | 4.428658 | 31.033587 | C | 33.866277 | 4.331704 | 23.757589 |
| O  | 18.426459 | 6.435404 | 27.964416 | C | 29.925474 | 5.752904 | 25.952593 |
| O  | 17.905278 | 4.289262 | 28.428409 | C | 29.389119 | 6.885623 | 26.590593 |
| C  | 18.097266 | 5.506499 | 28.786591 | C | 43.531837 | 6.835130 | 26.527230 |
| Cu | 34.192881 | 6.065185 | 26.042523 | C | 42.723550 | 5.978122 | 25.791099 |
| Cu | 33.603626 | 3.679943 | 26.564557 | C | 43.263526 | 4.868449 | 25.107727 |
| C  | 37.860303 | 3.889291 | 26.360018 | C | 44.662544 | 4.626763 | 25.184101 |
| C  | 38.384937 | 3.162063 | 27.444263 | C | 29.577856 | 3.831136 | 24.436256 |
| C  | 39.729369 | 2.817176 | 27.489201 | C | 44.385718 | 2.722749 | 23.703793 |
| C  | 40.574336 | 3.186231 | 26.448757 | C | 43.017244 | 2.930834 | 23.642248 |
| C  | 40.088075 | 3.891743 | 25.331396 | C | 42.430771 | 4.008182 | 24.343915 |
| C  | 38.709954 | 4.231586 | 25.272225 | O | 42.275832 | 2.023514 | 22.888521 |
| C  | 38.213594 | 4.871516 | 24.117430 | O | 32.227139 | 6.399553 | 25.972598 |
| C  | 39.070301 | 5.201082 | 23.071414 | O | 31.710823 | 4.251088 | 26.423529 |
| C  | 40.431417 | 4.914209 | 23.148192 | C | 31.373405 | 5.452444 | 26.126537 |
| C  | 40.952775 | 4.252847 | 24.268862 | C | 33.893198 | 5.763467 | 30.292880 |
| O  | 41.276815 | 5.257925 | 22.099097 | C | 35.059433 | 6.314927 | 30.853181 |
| O  | 36.090591 | 5.475572 | 26.136075 | C | 32.752354 | 5.560776 | 31.116720 |
| O  | 35.560442 | 3.340435 | 26.637412 | C | 31.540332 | 5.074673 | 30.588510 |
| C  | 36.419042 | 4.258619 | 26.382212 | C | 30.429722 | 4.915160 | 31.413100 |

|    |           |          |           |    |           |          |           |
|----|-----------|----------|-----------|----|-----------|----------|-----------|
| O  | 34.184739 | 6.365294 | 28.008974 | C  | 45.479666 | 5.495033 | 25.958908 |
| O  | 33.615705 | 4.232810 | 28.480309 | C  | 44.896328 | 6.599475 | 26.606439 |
| C  | 33.895769 | 5.433081 | 28.841618 | C  | 45.209571 | 3.553784 | 24.453431 |
| Cu | 49.688918 | 6.190776 | 25.990786 | O  | 47.709987 | 6.313670 | 25.889990 |
| Cu | 49.349268 | 3.768085 | 26.558576 | O  | 47.398316 | 4.141631 | 26.412965 |
| C  | 53.571003 | 4.464792 | 26.367939 | C  | 46.948793 | 5.301299 | 26.091674 |
| C  | 54.157058 | 3.947774 | 27.515902 | C  | 49.175928 | 5.947707 | 30.221737 |
| C  | 55.530059 | 3.732759 | 27.559826 | C  | 50.097755 | 6.809746 | 30.842717 |
| C  | 56.316002 | 4.036762 | 26.454787 | C  | 48.074594 | 5.445360 | 30.970197 |
| C  | 55.729946 | 4.554780 | 25.305823 | C  | 47.062622 | 4.666037 | 30.369607 |
| C  | 54.356947 | 4.768795 | 25.262899 | C  | 46.004603 | 4.176346 | 31.128959 |
| C  | 53.770890 | 5.287813 | 24.113936 | O  | 49.594491 | 6.538984 | 27.948227 |
| C  | 54.557834 | 5.591815 | 23.007897 | O  | 49.298099 | 4.359523 | 28.451654 |
| C  | 55.929834 | 5.377800 | 23.052821 | C  | 49.375980 | 5.594933 | 28.790054 |
| C  | 56.515889 | 4.858782 | 24.200784 | C  | 11.158286 | 7.260970 | 41.959133 |
| O  | 56.643771 | 5.617805 | 21.841785 | C  | 10.287269 | 6.502976 | 41.186145 |
| O  | 51.632511 | 5.831162 | 26.128908 | C  | 10.757253 | 5.394976 | 40.491133 |
| O  | 51.339369 | 3.650122 | 26.629469 | C  | 12.099253 | 5.042971 | 40.571108 |
| C  | 52.092776 | 4.660790 | 26.380081 | C  | 11.698221 | 3.178978 | 39.103109 |
| C  | 49.466779 | 4.021876 | 22.293156 | C  | 10.356221 | 3.528983 | 39.024134 |
| C  | 50.232745 | 2.940872 | 21.873104 | C  | 9.886237  | 4.637982 | 39.718146 |
| C  | 50.321669 | 2.637885 | 20.519096 | O  | 9.453204  | 2.792989 | 38.218147 |
| C  | 49.644627 | 3.416901 | 19.587140 | Cu | 17.241781 | 6.037628 | 41.460397 |
| C  | 48.879661 | 4.496905 | 20.007192 | Cu | 16.627561 | 3.652360 | 41.948810 |
| C  | 48.790737 | 4.799893 | 21.361200 | C  | 20.895043 | 3.821224 | 41.738203 |
| C  | 48.023772 | 5.880897 | 21.783251 | C  | 21.365823 | 2.911062 | 42.703407 |
| C  | 47.347731 | 6.658913 | 20.849295 | C  | 22.704679 | 2.548126 | 42.753781 |
| C  | 47.437655 | 6.354926 | 19.496287 | C  | 23.604737 | 3.092037 | 41.845881 |
| C  | 48.203620 | 5.273922 | 19.075235 | C  | 23.182259 | 3.995458 | 40.853151 |
| O  | 46.763613 | 7.184943 | 18.538331 | C  | 21.804175 | 4.336066 | 40.768424 |
| O  | 49.728037 | 5.586509 | 24.094321 | C  | 21.371882 | 5.149890 | 39.700598 |
| O  | 49.391355 | 3.417099 | 24.603279 | C  | 22.290401 | 5.665278 | 38.790844 |
| C  | 49.525626 | 4.364773 | 23.749433 | C  | 23.649596 | 5.395258 | 38.919112 |

|   |           |          |           |    |           |          |           |
|---|-----------|----------|-----------|----|-----------|----------|-----------|
| C | 24.108837 | 4.558795 | 39.942764 | C  | 16.757458 | 5.719333 | 45.688738 |
| O | 24.552687 | 5.924640 | 38.006272 | C  | 17.791097 | 6.453773 | 46.298759 |
| O | 19.133643 | 5.433324 | 41.571082 | C  | 18.794387 | 6.910353 | 32.222689 |
| O | 18.582919 | 3.289958 | 42.002231 | C  | 17.684075 | 6.483621 | 32.943191 |
| C | 19.452426 | 4.205531 | 41.771536 | C  | 16.646237 | 5.761855 | 32.322187 |
| C | 16.792469 | 4.069114 | 37.701462 | C  | 15.616465 | 5.351058 | 46.455486 |
| C | 17.455306 | 2.944462 | 37.178805 | C  | 14.510002 | 4.697740 | 45.872692 |
| C | 17.460639 | 2.692063 | 35.813858 | C  | 13.410013 | 4.345215 | 46.648590 |
| C | 16.802509 | 3.557005 | 34.946664 | C  | 14.468994 | 4.672388 | 32.402689 |
| C | 16.097228 | 4.679642 | 35.428388 | C  | 15.509253 | 5.345237 | 33.057585 |
| C | 16.071237 | 4.926743 | 36.826653 | O  | 13.346451 | 4.277840 | 33.122073 |
| C | 15.301586 | 6.001597 | 37.315126 | O  | 17.197194 | 6.323814 | 43.427031 |
| C | 14.618921 | 6.833086 | 36.436172 | O  | 16.647113 | 4.180307 | 43.865845 |
| C | 14.671952 | 6.630019 | 35.067100 | C  | 16.879276 | 5.385673 | 44.242680 |
| C | 15.419347 | 5.553640 | 34.538266 | Cu | 33.464608 | 6.627629 | 41.371161 |
| O | 13.985794 | 7.542100 | 34.268261 | Cu | 32.396139 | 3.839335 | 42.152902 |
| O | 17.203863 | 5.517655 | 39.545648 | C  | 36.548831 | 3.649783 | 41.296777 |
| O | 16.641438 | 3.376016 | 39.977897 | C  | 36.992464 | 2.719815 | 42.220336 |
| C | 16.885039 | 4.335363 | 39.161029 | C  | 38.352733 | 2.340588 | 42.251198 |
| C | 12.972270 | 5.800966 | 41.346096 | C  | 39.252760 | 2.892241 | 41.365317 |
| C | 12.500286 | 6.908965 | 42.040108 | C  | 38.841528 | 3.828674 | 40.361363 |
| C | 26.307283 | 6.334268 | 43.235126 | C  | 37.446538 | 4.188984 | 40.313493 |
| C | 25.636186 | 5.801633 | 42.154444 | C  | 37.010843 | 5.050555 | 39.266321 |
| C | 26.276288 | 4.945993 | 41.198199 | C  | 37.897445 | 5.553941 | 38.345040 |
| C | 27.686218 | 4.692228 | 41.376592 | C  | 39.284305 | 5.260620 | 38.428461 |
| C | 12.571237 | 3.934972 | 39.877096 | C  | 39.761313 | 4.406944 | 39.421432 |
| C | 27.677268 | 3.352265 | 39.350592 | O  | 40.148757 | 5.814009 | 37.532827 |
| C | 26.282097 | 3.565109 | 39.182802 | O  | 34.932989 | 5.365262 | 41.209470 |
| C | 25.571427 | 4.346988 | 40.091411 | O  | 34.263183 | 3.310497 | 41.815252 |
| O | 25.772537 | 2.917805 | 38.097366 | C  | 35.138013 | 4.140133 | 41.437385 |
| O | 15.285868 | 6.391096 | 41.364764 | C  | 31.965957 | 4.203448 | 38.116411 |
| O | 14.736418 | 4.253380 | 41.824540 | C  | 31.999188 | 2.885147 | 37.676352 |
| C | 14.416810 | 5.458928 | 41.518656 | C  | 31.979572 | 2.580914 | 36.303973 |

|   |           |          |           |    |           |          |           |
|---|-----------|----------|-----------|----|-----------|----------|-----------|
| C | 31.899200 | 3.592374 | 35.371378 | C  | 30.495281 | 5.228651 | 32.769886 |
| C | 31.833906 | 4.970676 | 35.750585 | C  | 31.684837 | 5.715079 | 33.324475 |
| C | 31.897614 | 5.282736 | 37.162325 | O  | 29.375498 | 5.068090 | 33.576059 |
| C | 31.889339 | 6.659407 | 37.539419 | O  | 33.380580 | 6.662456 | 43.422856 |
| C | 31.772852 | 7.648901 | 36.596166 | O  | 32.868096 | 4.522829 | 43.901184 |
| C | 31.668154 | 7.348490 | 35.213007 | C  | 33.025823 | 5.743063 | 44.207436 |
| C | 31.722553 | 6.028006 | 34.775971 | Cu | 48.388604 | 6.278306 | 41.557617 |
| O | 31.537013 | 8.460475 | 34.426628 | Cu | 48.017308 | 3.841627 | 42.045029 |
| O | 32.168964 | 5.528950 | 40.133876 | C  | 52.242278 | 4.464620 | 41.931334 |
| O | 31.932041 | 3.337250 | 40.317473 | C  | 52.828353 | 3.947597 | 43.079285 |
| C | 32.027292 | 4.391505 | 39.604137 | C  | 54.201353 | 3.732577 | 43.123183 |
| C | 28.361834 | 5.284899 | 42.496109 | C  | 54.987278 | 4.036581 | 42.018131 |
| C | 27.678694 | 6.076445 | 43.411103 | C  | 54.401203 | 4.554604 | 40.869180 |
| C | 42.176254 | 6.840887 | 41.990123 | C  | 53.028203 | 4.768624 | 40.826281 |
| C | 41.411992 | 6.028513 | 41.160601 | C  | 52.442128 | 5.287648 | 39.677330 |
| C | 42.002235 | 4.999112 | 40.400318 | C  | 53.229054 | 5.591652 | 38.571278 |
| C | 43.403172 | 4.781025 | 40.506465 | C  | 54.601054 | 5.377632 | 38.616177 |
| C | 28.359695 | 3.887032 | 40.412056 | C  | 55.187129 | 4.858609 | 39.764128 |
| C | 43.217616 | 3.001815 | 38.865195 | O  | 55.314970 | 5.617639 | 37.405129 |
| C | 41.848608 | 3.191336 | 38.768984 | O  | 50.329191 | 5.876361 | 41.709867 |
| C | 41.222320 | 4.195535 | 39.532719 | O  | 49.997570 | 3.693563 | 42.178355 |
| O | 41.149600 | 2.343421 | 37.914199 | C  | 50.768537 | 4.693403 | 41.948492 |
| O | 30.478693 | 6.127502 | 43.192745 | C  | 48.273395 | 4.250346 | 37.801998 |
| O | 30.404408 | 4.036190 | 42.502260 | C  | 49.090296 | 3.216619 | 37.310694 |
| C | 29.821528 | 5.112452 | 42.721439 | C  | 49.158359 | 2.948297 | 35.950532 |
| C | 32.762618 | 6.114113 | 45.644699 | C  | 48.409030 | 3.704873 | 35.056447 |
| C | 33.541338 | 7.113757 | 46.202111 | C  | 47.555280 | 4.734243 | 35.505008 |
| C | 35.128787 | 6.614218 | 32.207384 | C  | 47.471131 | 4.999165 | 36.898154 |
| C | 34.025978 | 6.391705 | 33.024135 | C  | 46.564957 | 5.978100 | 37.352719 |
| C | 32.821542 | 5.886537 | 32.499646 | C  | 45.803010 | 6.704543 | 36.446656 |
| C | 31.712984 | 5.499220 | 46.415326 | C  | 45.903340 | 6.483435 | 35.083234 |
| C | 30.833996 | 4.517183 | 45.875469 | C  | 46.784483 | 5.495840 | 34.587305 |
| C | 29.794110 | 4.002734 | 46.609669 | O  | 45.125688 | 7.291023 | 34.255888 |

|    |           |          |           |   |           |          |           |
|----|-----------|----------|-----------|---|-----------|----------|-----------|
| O  | 48.445905 | 5.748729 | 39.644863 | C | 19.604357 | 4.067200 | 57.439091 |
| O  | 48.137096 | 3.556645 | 40.078962 | C | 20.158667 | 3.297375 | 58.477471 |
| C  | 48.286705 | 4.534420 | 39.261265 | C | 21.513717 | 2.991243 | 58.493165 |
| C  | 44.174447 | 5.597727 | 41.379393 | C | 22.338528 | 3.439547 | 57.466833 |
| C  | 43.544673 | 6.632865 | 42.093297 | C | 21.821889 | 4.188147 | 56.391998 |
| C  | 43.998347 | 3.781690 | 39.711475 | C | 20.434958 | 4.494142 | 56.365137 |
| O  | 46.407959 | 6.424903 | 41.432000 | C | 19.910429 | 5.183499 | 55.251054 |
| O  | 46.076152 | 4.231463 | 41.841809 | C | 20.746274 | 5.592756 | 54.216806 |
| C  | 45.639069 | 5.405373 | 41.560081 | C | 22.113156 | 5.330395 | 54.260084 |
| C  | 47.833662 | 5.935421 | 45.769951 | C | 22.662502 | 4.619082 | 55.335566 |
| C  | 48.781552 | 6.764656 | 46.397650 | O | 22.936277 | 5.745056 | 53.218914 |
| C  | 49.976785 | 7.133575 | 32.188163 | O | 17.796844 | 5.612558 | 57.303818 |
| C  | 48.929795 | 6.606998 | 32.937017 | O | 17.314679 | 3.438621 | 57.669198 |
| C  | 47.967149 | 5.763309 | 32.350157 | C | 18.152989 | 4.392735 | 57.483051 |
| C  | 46.713823 | 5.467935 | 46.512384 | C | 15.692704 | 4.220745 | 53.322437 |
| C  | 45.683384 | 4.717163 | 45.908231 | C | 16.398889 | 3.103504 | 52.840819 |
| C  | 44.604970 | 4.265207 | 46.662824 | C | 16.454093 | 2.825125 | 51.482579 |
| C  | 45.924020 | 4.444334 | 32.492840 | C | 15.798140 | 3.652391 | 50.578880 |
| C  | 46.891655 | 5.245758 | 33.113748 | C | 15.057691 | 4.770754 | 51.014702 |
| O  | 44.863218 | 3.945706 | 33.240520 | C | 14.992516 | 5.053433 | 52.406427 |
| O  | 48.276015 | 6.565638 | 43.518943 | C | 14.199252 | 6.131789 | 52.846107 |
| O  | 47.909253 | 4.382669 | 43.956688 | C | 13.532535 | 6.933323 | 51.928008 |
| C  | 48.021444 | 5.606150 | 44.331059 | C | 13.613828 | 6.688827 | 50.567178 |
| C  | 9.830848  | 7.260896 | 57.522290 | C | 14.376876 | 5.601077 | 50.085322 |
| C  | 8.959816  | 6.502907 | 56.749315 | O | 12.934873 | 7.570206 | 49.728355 |
| C  | 9.429783  | 5.394908 | 56.054291 | O | 15.952841 | 5.665883 | 55.206051 |
| C  | 10.771783 | 5.042898 | 56.134241 | O | 15.447573 | 3.499312 | 55.578248 |
| C  | 10.370718 | 3.178911 | 54.666243 | C | 15.695842 | 4.479147 | 54.788046 |
| C  | 9.028718  | 3.528920 | 54.587293 | C | 11.644816 | 5.800887 | 56.909216 |
| C  | 8.558750  | 4.637919 | 55.281317 | C | 11.172849 | 6.908886 | 57.603240 |
| O  | 8.125684  | 2.792932 | 53.781319 | C | 25.348630 | 7.149027 | 57.534293 |
| Cu | 15.893280 | 6.147322 | 57.135184 | C | 24.504937 | 6.314119 | 56.811421 |
| Cu | 15.348564 | 3.731586 | 57.549803 | C | 25.007308 | 5.205053 | 56.100117 |

|    |           |          |           |   |           |          |           |
|----|-----------|----------|-----------|---|-----------|----------|-----------|
| C  | 26.403450 | 4.939607 | 56.134867 | C | 37.737348 | 5.119933 | 54.202336 |
| C  | 11.243751 | 3.934900 | 55.440217 | C | 38.279219 | 4.461690 | 55.315437 |
| C  | 26.056935 | 3.073348 | 54.620597 | O | 38.560752 | 5.446350 | 53.130836 |
| C  | 24.689793 | 3.294506 | 54.612774 | O | 33.416938 | 5.673621 | 57.298388 |
| C  | 24.139693 | 4.364655 | 55.353710 | O | 32.947218 | 3.497517 | 57.670172 |
| O  | 23.913149 | 2.408837 | 53.868591 | C | 33.779345 | 4.456344 | 57.491600 |
| O  | 13.938059 | 6.435217 | 56.970712 | C | 31.465317 | 4.305094 | 53.305864 |
| O  | 13.439516 | 4.272459 | 57.367275 | C | 32.282304 | 3.247297 | 52.867053 |
| C  | 13.092886 | 5.476698 | 57.083123 | C | 32.459144 | 2.994816 | 51.514045 |
| C  | 15.283046 | 5.695821 | 61.352095 | C | 31.811055 | 3.783852 | 50.571516 |
| C  | 16.314087 | 6.385804 | 61.978046 | C | 30.953601 | 4.831983 | 50.961425 |
| C  | 17.733656 | 6.784962 | 47.646135 | C | 30.777371 | 5.099534 | 52.347007 |
| C  | 16.637604 | 6.398186 | 48.408724 | C | 29.892004 | 6.123969 | 52.735046 |
| C  | 15.567958 | 5.683658 | 47.836259 | C | 29.218736 | 6.869833 | 51.772980 |
| C  | 14.198081 | 5.242825 | 62.095148 | C | 29.383655 | 6.618382 | 50.420493 |
| C  | 13.166040 | 4.552842 | 61.469196 | C | 30.261182 | 5.602389 | 49.995511 |
| C  | 12.083075 | 4.099846 | 62.213249 | O | 28.655001 | 7.407373 | 49.535436 |
| C  | 13.377935 | 4.632397 | 48.010907 | O | 31.569202 | 5.749400 | 55.203135 |
| C  | 14.443543 | 5.313613 | 48.615030 | O | 31.126141 | 3.564546 | 55.546776 |
| O  | 12.270540 | 4.276334 | 48.772771 | C | 31.371775 | 4.557139 | 54.770474 |
| O  | 15.754281 | 6.384465 | 59.109317 | C | 27.253978 | 5.768460 | 56.918456 |
| O  | 15.282340 | 4.209919 | 59.475667 | C | 26.709097 | 6.880269 | 57.586728 |
| C  | 15.445746 | 5.413468 | 59.891783 | C | 40.918022 | 6.954579 | 57.602495 |
| Cu | 31.501874 | 6.198601 | 57.140650 | C | 40.092847 | 6.133364 | 56.845946 |
| Cu | 30.986946 | 3.770681 | 57.523001 | C | 40.610550 | 5.033334 | 56.130466 |
| C  | 35.229289 | 4.129315 | 57.473723 | C | 42.006975 | 4.769916 | 56.186969 |
| C  | 35.773302 | 3.415037 | 58.556456 | C | 26.913852 | 3.878932 | 55.360209 |
| C  | 37.118155 | 3.069217 | 58.579204 | C | 41.689517 | 2.917056 | 54.651460 |
| C  | 37.942130 | 3.420746 | 57.515832 | C | 40.322448 | 3.139647 | 54.616455 |
| C  | 37.436258 | 4.118106 | 56.401669 | C | 39.756961 | 4.202799 | 55.356668 |
| C  | 36.059459 | 4.466448 | 56.369791 | O | 39.560836 | 2.256064 | 53.854725 |
| C  | 35.543111 | 5.107108 | 55.224202 | O | 29.534989 | 6.466273 | 56.993046 |
| C  | 36.378044 | 5.421436 | 54.156346 | O | 29.077583 | 4.283129 | 57.324628 |

|    |           |          |           |   |           |          |           |
|----|-----------|----------|-----------|---|-----------|----------|-----------|
| C  | 28.707974 | 5.488441 | 57.082992 | C | 47.867453 | 3.068662 | 51.453953 |
| C  | 30.903120 | 5.695641 | 61.351269 | C | 47.083472 | 3.803691 | 50.572785 |
| C  | 31.934175 | 6.385618 | 61.977205 | C | 46.217612 | 4.817864 | 51.033611 |
| C  | 33.348452 | 7.508042 | 47.544907 | C | 46.152373 | 5.085127 | 52.427665 |
| C  | 32.363427 | 6.923398 | 48.312971 | C | 45.239655 | 6.051053 | 52.895282 |
| C  | 31.496984 | 5.915572 | 47.780622 | C | 44.449101 | 6.760695 | 52.000216 |
| C  | 29.818167 | 5.242646 | 62.094340 | C | 44.527009 | 6.535154 | 50.635647 |
| C  | 28.786113 | 4.552669 | 61.468405 | C | 45.415999 | 5.560848 | 50.126623 |
| C  | 27.703159 | 4.099675 | 62.212476 | O | 43.724614 | 7.330627 | 49.820513 |
| C  | 29.584920 | 4.396803 | 47.956168 | O | 47.125564 | 5.794003 | 55.212512 |
| C  | 30.434066 | 5.328368 | 48.550787 | O | 46.818226 | 3.586791 | 55.565462 |
| O  | 28.558777 | 3.852989 | 48.668881 | C | 46.972992 | 4.592571 | 54.785061 |
| O  | 31.368344 | 6.407235 | 59.116762 | C | 42.841612 | 5.598641 | 56.986571 |
| O  | 30.892652 | 4.229091 | 59.455379 | C | 42.277522 | 6.691544 | 57.671107 |
| C  | 31.059325 | 5.427315 | 59.887100 | C | 42.532599 | 3.716624 | 55.413648 |
| Cu | 47.052392 | 6.246823 | 57.148427 | O | 45.079825 | 6.394824 | 57.018696 |
| Cu | 46.689696 | 3.790934 | 57.535764 | O | 44.744733 | 4.189432 | 57.351165 |
| C  | 50.914829 | 4.464394 | 57.493750 | C | 44.308004 | 5.375661 | 57.119728 |
| C  | 51.500923 | 3.947364 | 58.641689 | C | 46.523195 | 5.695406 | 61.350162 |
| C  | 52.873923 | 3.732339 | 58.685563 | C | 47.554262 | 6.385378 | 61.976082 |
| C  | 53.659830 | 4.036343 | 57.580498 | C | 48.662675 | 7.096597 | 47.740407 |
| C  | 53.073736 | 4.554373 | 56.431559 | C | 47.591644 | 6.611218 | 48.481229 |
| C  | 51.700736 | 4.768398 | 56.388685 | C | 46.607049 | 5.795526 | 47.890553 |
| C  | 51.114643 | 5.287428 | 55.239746 | C | 45.438253 | 5.242413 | 62.093251 |
| C  | 51.901549 | 5.591433 | 54.133681 | C | 44.406185 | 4.552442 | 61.467332 |
| C  | 53.273549 | 5.377407 | 54.178555 | C | 43.323243 | 4.099449 | 62.211421 |
| C  | 53.859642 | 4.858378 | 55.326493 | C | 44.524011 | 4.541057 | 48.025580 |
| O  | 53.987445 | 5.617415 | 52.967495 | C | 45.512381 | 5.314059 | 48.650428 |
| O  | 48.992071 | 5.857440 | 57.300410 | O | 43.443525 | 4.078498 | 48.768124 |
| O  | 48.674657 | 3.653577 | 57.672182 | O | 46.920681 | 6.442166 | 59.122346 |
| C  | 49.438787 | 4.671146 | 57.498581 | O | 46.574869 | 4.238004 | 59.463156 |
| C  | 46.977932 | 4.347980 | 53.319264 | C | 46.675608 | 5.443126 | 59.890825 |
| C  | 47.813668 | 3.335779 | 52.814279 | C | 16.262162 | 6.620790 | 63.347051 |

|   |           |          |           |   |           |          |           |
|---|-----------|----------|-----------|---|-----------|----------|-----------|
| C | 15.179196 | 6.168795 | 64.090104 | H | 26.128118 | 6.558552 | 25.802270 |
| C | 14.147156 | 5.478812 | 63.465153 | H | 14.941464 | 3.633615 | 24.312815 |
| C | 12.031150 | 4.336833 | 63.582254 | H | 29.116241 | 2.180973 | 23.147279 |
| C | 13.063191 | 5.025817 | 64.207206 | H | 19.780483 | 6.932119 | 30.326511 |
| O | 10.943187 | 3.908837 | 64.361307 | H | 15.660656 | 4.605597 | 29.237826 |
| C | 31.882275 | 6.620600 | 63.346211 | H | 13.729706 | 3.929264 | 30.525093 |
| C | 30.799322 | 6.168606 | 64.089282 | H | 15.672185 | 6.861350 | 17.596330 |
| C | 29.767267 | 5.478629 | 63.464346 | H | 25.164790 | 6.270450 | 21.559206 |
| C | 27.651260 | 4.336658 | 63.581482 | H | 25.594895 | 2.569538 | 22.984166 |
| C | 28.683314 | 5.025635 | 64.206417 | H | 37.740022 | 2.871680 | 28.266009 |
| O | 26.563309 | 3.908663 | 64.360554 | H | 40.120492 | 2.263452 | 28.337184 |
| C | 47.502389 | 6.620356 | 63.345091 | H | 41.616036 | 2.903067 | 26.517093 |
| C | 46.419447 | 6.168363 | 64.088179 | H | 37.162633 | 5.115069 | 24.000513 |
| C | 45.387379 | 5.478391 | 63.463260 | H | 38.666668 | 5.693265 | 22.196955 |
| C | 43.271369 | 4.336426 | 63.580429 | H | 35.149084 | 2.328493 | 22.590754 |
| C | 44.303437 | 5.025398 | 64.205349 | H | 35.298504 | 1.793509 | 20.190378 |
| O | 42.183431 | 3.908432 | 64.359519 | H | 34.099935 | 3.170577 | 18.536510 |
| H | 12.119316 | 8.127320 | 26.935403 | H | 32.265803 | 6.143753 | 22.826270 |
| H | 10.573062 | 6.786924 | 25.566212 | H | 31.124962 | 7.499641 | 21.165105 |
| H | 13.383644 | 2.323186 | 22.982549 | H | 30.035105 | 7.547351 | 27.156130 |
| H | 9.847515  | 3.169908 | 22.676554 | H | 43.097347 | 7.689919 | 27.036116 |
| H | 22.117625 | 2.862301 | 28.223982 | H | 41.667235 | 6.201408 | 25.747514 |
| H | 24.518638 | 2.335815 | 28.295218 | H | 30.637086 | 3.607498 | 24.382941 |
| H | 26.017717 | 3.150019 | 26.548043 | H | 44.812518 | 1.896346 | 23.151407 |
| H | 21.522125 | 5.331194 | 24.080745 | H | 35.927656 | 6.496534 | 30.229583 |
| H | 23.030277 | 6.089958 | 22.355612 | H | 31.434092 | 4.821180 | 29.537372 |
| H | 19.533121 | 2.330426 | 22.589880 | H | 29.508614 | 4.542578 | 30.985171 |
| H | 19.679653 | 1.794311 | 20.190480 | H | 31.292333 | 6.861283 | 17.596307 |
| H | 18.480621 | 3.170892 | 18.536721 | H | 40.796242 | 5.762597 | 21.369409 |
| H | 16.649657 | 6.144518 | 22.827030 | H | 41.292472 | 2.234358 | 22.875468 |
| H | 15.506576 | 7.500787 | 21.165127 | H | 53.552028 | 3.699311 | 28.381080 |
| H | 14.495706 | 7.508990 | 27.086640 | H | 55.987677 | 3.325963 | 28.455687 |
| H | 27.628753 | 8.034556 | 27.033581 | H | 57.384056 | 3.866290 | 26.497852 |



|                                |                                |
|--------------------------------|--------------------------------|
| H 52.703418 5.453306 24.015720 | H 18.652249 6.763746 45.717690 |
| H 54.081165 5.976315 22.116909 | H 19.577584 7.477445 32.716054 |
| H 50.777540 2.334604 22.589108 | H 17.633611 6.736611 33.993623 |
| H 50.920824 1.795210 20.189775 | H 14.470451 4.460795 44.814930 |
| H 49.720320 3.170916 18.535938 | H 12.576104 3.840726 46.179617 |
| H 47.863464 6.134602 22.823904 | H 12.684859 3.771415 32.552838 |
| H 46.741165 7.496801 21.164858 | H 14.034118 7.320728 33.288326 |
| H 45.513441 7.281406 27.180494 | H 24.115494 6.559622 37.353651 |
| H 46.273334 3.345463 24.438748 | H 24.835615 3.113925 37.944159 |
| H 50.923915 7.220945 30.273909 | H 36.282437 2.311442 42.943586 |
| H 47.063622 4.435260 29.309842 | H 38.696136 1.616980 42.997343 |
| H 45.243185 3.578527 30.646515 | H 40.304327 2.595197 41.430033 |
| H 46.912816 6.861653 17.595795 | H 35.956690 5.313281 39.187956 |
| H 56.056214 5.977061 21.104074 | H 37.536142 6.206665 37.541105 |
| H 10.790772 8.127608 42.499069 | H 32.052895 2.087923 38.418996 |
| H 9.244395 6.786959 41.130123  | H 32.028512 1.537461 35.977094 |
| H 12.055540 2.325659 38.543125 | H 31.888008 3.312405 34.313343 |
| H 8.519242 3.170915 38.239812  | H 31.994517 6.926940 38.588697 |
| H 20.681650 2.488553 43.430962 | H 31.760755 8.703349 36.885773 |
| H 23.049835 1.847037 43.507654 | H 28.197351 6.490082 44.278966 |
| H 24.640958 2.787621 41.917957 | H 41.703407 7.638082 42.555326 |
| H 20.324902 5.382720 39.537931 | H 40.349364 6.224642 41.105529 |
| H 21.933375 6.288143 37.981397 | H 29.422881 3.674441 40.520446 |
| H 17.984134 2.268690 37.841189 | H 43.681528 2.233612 38.260421 |
| H 17.983604 1.824594 35.423594 | H 34.308604 7.590330 45.587161 |
| H 16.832123 3.328747 33.890653 | H 36.043602 7.020292 32.628138 |
| H 15.201542 6.208101 38.374757 | H 34.120945 6.626889 34.076446 |
| H 14.033258 7.658180 36.818979 | H 30.993346 4.159770 44.864291 |
| H 13.169553 7.508714 42.647679 | H 29.126345 3.260212 46.156140 |
| H 25.778744 6.965293 43.956101 | H 28.593515 4.671471 33.076323 |
| H 24.576837 6.052467 42.043987 | H 31.432476 8.245577 33.486624 |
| H 13.612098 3.635448 39.861497 | H 39.666469 6.406527 36.933821 |
| H 28.190952 2.740234 38.604639 | H 40.159269 2.534062 37.887597 |

|   |           |          |           |   |           |          |           |
|---|-----------|----------|-----------|---|-----------|----------|-----------|
| H | 52.223352 | 3.703704 | 43.945662 | H | 12.932475 | 7.764484 | 52.273515 |
| H | 54.659108 | 3.326668 | 44.019334 | H | 11.840552 | 7.509343 | 58.212198 |
| H | 56.055338 | 3.866232 | 42.061068 | H | 24.943270 | 8.005409 | 58.063932 |
| H | 51.374822 | 5.453943 | 39.579447 | H | 23.451159 | 6.553629 | 56.798531 |
| H | 52.752290 | 5.975929 | 37.680128 | H | 12.285047 | 3.636113 | 55.427474 |
| H | 49.688609 | 2.625181 | 37.994423 | H | 26.456526 | 2.257062 | 54.033786 |
| H | 49.799026 | 2.151788 | 35.585393 | H | 17.168134 | 6.739851 | 61.410666 |
| H | 48.488996 | 3.465792 | 34.005574 | H | 18.543415 | 7.345310 | 48.103132 |
| H | 46.419333 | 6.189179 | 38.406026 | H | 16.625303 | 6.674028 | 49.454522 |
| H | 45.112687 | 7.457073 | 36.803828 | H | 13.129947 | 4.375206 | 60.400605 |
| H | 44.126156 | 7.276702 | 42.743431 | H | 11.277940 | 3.574218 | 61.719337 |
| H | 45.066693 | 3.593922 | 39.721263 | H | 11.585478 | 3.763946 | 48.237800 |
| H | 49.622794 | 7.150613 | 45.833167 | H | 13.028957 | 7.338531 | 48.754213 |
| H | 50.701216 | 7.793112 | 32.655715 | H | 22.434230 | 6.269301 | 52.518116 |
| H | 48.867771 | 6.876841 | 33.982715 | H | 22.931726 | 2.627231 | 53.894703 |
| H | 45.686775 | 4.479547 | 44.849835 | H | 35.141021 | 3.126922 | 59.388505 |
| H | 43.828450 | 3.689165 | 46.177903 | H | 37.524552 | 2.521625 | 59.423760 |
| H | 44.250820 | 3.357430 | 32.695539 | H | 38.982934 | 3.130404 | 57.563530 |
| H | 45.227807 | 7.069368 | 33.280325 | H | 34.493468 | 5.366035 | 55.133004 |
| H | 54.726416 | 5.972044 | 36.665708 | H | 35.959362 | 5.912585 | 53.288300 |
| H | 9.463366  | 8.127025 | 58.062977 | H | 32.798558 | 2.623754 | 53.588360 |
| H | 7.916921  | 6.786659 | 56.693646 | H | 33.102739 | 2.181847 | 51.192261 |
| H | 10.728046 | 2.325206 | 54.106911 | H | 31.973406 | 3.553669 | 49.526856 |
| H | 7.191285  | 3.169589 | 53.804726 | H | 29.692254 | 6.351182 | 53.777102 |
| H | 19.528862 | 2.943556 | 59.285752 | H | 28.534371 | 7.650237 | 52.078951 |
| H | 21.928762 | 2.404201 | 59.306498 | H | 27.350481 | 7.532105 | 58.169010 |
| H | 23.388717 | 3.184056 | 57.511297 | H | 40.500410 | 7.801817 | 58.137302 |
| H | 18.853015 | 5.405168 | 55.154742 | H | 39.040993 | 6.377602 | 56.811827 |
| H | 20.320539 | 6.122112 | 53.375128 | H | 27.974547 | 3.664298 | 55.297874 |
| H | 16.916326 | 2.448196 | 53.532289 | H | 42.100463 | 2.105749 | 54.065622 |
| H | 17.008162 | 1.962092 | 51.126828 | H | 32.786996 | 6.741941 | 61.409440 |
| H | 15.861553 | 3.399684 | 49.530092 | H | 33.984564 | 8.287078 | 47.977048 |
| H | 14.069778 | 6.366499 | 53.896397 | H | 32.235656 | 7.254528 | 49.348621 |

|   |           |          |           |   |           |           |           |
|---|-----------|----------|-----------|---|-----------|-----------|-----------|
| H | 28.750045 | 4.374172 | 60.400051 | H | 46.387793 | 6.357284  | 65.153489 |
| H | 26.897865 | 3.574261 | 61.718511 | H | 41.501393 | 3.424782  | 63.794566 |
| H | 28.091749 | 3.199885 | 48.122918 | H | 54.922545 | 4.682791  | 55.325743 |
| H | 28.742896 | 7.107722 | 48.575226 | H | 56.250070 | 4.683137  | 39.763668 |
| H | 38.068434 | 5.944280 | 52.404113 | H | 57.578882 | 4.683431  | 24.200630 |
| H | 38.581389 | 2.483594 | 53.850670 | H | 32.654283 | 5.043367  | 18.026539 |
| H | 50.894985 | 3.699885 | 59.506326 | H | 17.034862 | 5.043626  | 18.026680 |
| H | 53.331560 | 3.325478 | 59.581279 | H | 10.176560 | 4.915306  | 24.089557 |
| H | 54.727841 | 3.865719 | 57.623124 | H | 8.847971  | 4.915534  | 39.653308 |
| H | 50.047609 | 5.459177 | 55.145227 | H | 7.520542  | 4.915509  | 55.216501 |
| H | 51.424912 | 5.976971 | 53.242965 | H | 12.998928 | 5.198976  | 65.269026 |
| H | 48.429822 | 2.752556 | 53.489170 | H | 28.618789 | 5.198940  | 65.268159 |
| H | 48.518427 | 2.285063 | 51.079240 | H | 44.238642 | 5.198816  | 65.267024 |
| H | 47.147421 | 3.559420 | 49.522179 | H | 48.273932 | 5.043147  | 18.026074 |
| H | 45.112900 | 6.265989 | 53.950382 | C | 31.379495 | 8.439326  | 41.181451 |
| H | 43.754087 | 7.504252 | 52.366950 | C | 31.208252 | 8.931644  | 42.646400 |
| H | 42.906656 | 7.343576 | 58.266462 | C | 31.612195 | 10.401545 | 42.808779 |
| H | 43.594056 | 3.501462 | 55.371689 | C | 30.937256 | 11.331841 | 41.793587 |
| H | 48.405712 | 6.744479 | 61.407889 | C | 31.220664 | 10.859891 | 40.360398 |
| H | 49.404832 | 7.733953 | 48.210848 | C | 30.745418 | 9.417067  | 40.167322 |
| H | 47.529300 | 6.891257 | 49.524040 | O | 32.726362 | 8.264278  | 40.919292 |
| H | 44.381451 | 4.364402 | 60.399357 | C | 29.397079 | 8.974938  | 44.406531 |
| H | 42.519354 | 3.571600 | 61.717716 | C | 28.098031 | 9.468290  | 44.604395 |
| H | 42.814529 | 3.510717 | 48.220001 | C | 27.645817 | 9.771066  | 45.892091 |
| H | 43.806804 | 7.103226 | 48.844482 | C | 28.487882 | 9.598039  | 46.996191 |
| H | 53.398719 | 5.970593 | 52.227534 | C | 29.784193 | 9.108586  | 46.796593 |
| H | 17.068210 | 7.158077 | 63.836024 | C | 30.239019 | 8.789458  | 45.514314 |
| H | 15.148100 | 6.357250 | 65.155561 | N | 29.824206 | 8.592486  | 43.098723 |
| H | 10.263098 | 3.421682 | 63.797232 | H | 31.422955 | 10.734290 | 43.844697 |
| H | 32.687960 | 7.158510 | 63.835035 | H | 31.886705 | 8.311845  | 43.246688 |
| H | 30.767994 | 6.357266 | 65.154673 | H | 30.836702 | 7.475553  | 41.068413 |
| H | 25.881948 | 3.423843 | 63.795914 | H | 31.291080 | 12.368439 | 41.942466 |
| H | 48.307556 | 7.159072 | 63.833758 | H | 29.841602 | 11.350645 | 41.968335 |

|                       |           |           |           |   |           |          |           |
|-----------------------|-----------|-----------|-----------|---|-----------|----------|-----------|
| H                     | 30.731315 | 11.525590 | 39.625547 | C | 25.305882 | 4.529409 | 24.319477 |
| H                     | 32.308448 | 10.905175 | 40.168901 | O | 25.606538 | 5.647080 | 22.202108 |
| H                     | 29.640456 | 9.375343  | 40.268291 | O | 20.433876 | 5.529557 | 26.189389 |
| H                     | 30.976962 | 9.049116  | 39.154078 | O | 19.918112 | 3.381507 | 26.648373 |
| H                     | 32.705427 | 10.434224 | 42.653119 | C | 20.771331 | 4.312867 | 26.415445 |
| H                     | 27.436146 | 9.608513  | 43.742448 | C | 18.226927 | 4.022014 | 22.293999 |
| H                     | 26.628843 | 10.152707 | 46.029416 | C | 18.992915 | 2.941012 | 21.873981 |
| H                     | 28.138979 | 9.835930  | 48.005303 | C | 19.081890 | 2.638017 | 20.519979 |
| H                     | 30.457235 | 8.960656  | 47.646309 | C | 18.404876 | 3.417023 | 19.587993 |
| H                     | 31.245867 | 8.389306  | 45.383579 | C | 17.639888 | 4.497024 | 20.008011 |
| H                     | 30.022368 | 7.099090  | 43.131578 | C | 17.550913 | 4.800019 | 21.362013 |
| H                     | 29.130156 | 8.865322  | 42.401950 | C | 16.783924 | 5.881020 | 21.784030 |
|                       |           |           |           | C | 16.107910 | 6.659026 | 20.850045 |
|                       |           |           |           | C | 16.197885 | 6.355031 | 19.497042 |
| ( <i>R,R</i> )-2-Int3 |           |           |           | C | 16.963875 | 5.274030 | 19.076025 |
| C                     | 12.487000 | 7.261000  | 26.395000 | O | 15.523872 | 7.185037 | 18.539057 |
| C                     | 11.616000 | 6.503000  | 25.622000 | O | 18.565044 | 5.532083 | 24.111142 |
| C                     | 12.086000 | 5.395000  | 24.927000 | O | 18.024977 | 3.390631 | 24.574154 |
| C                     | 13.428000 | 5.043000  | 25.007000 | C | 18.266031 | 4.338278 | 23.745298 |
| C                     | 13.027000 | 3.179000  | 23.539000 | C | 14.301000 | 5.801000 | 25.782000 |
| C                     | 11.685000 | 3.529000  | 23.460000 | C | 13.829000 | 6.909000 | 26.476000 |
| C                     | 11.215000 | 4.638000  | 24.154000 | C | 27.978551 | 7.141444 | 26.445114 |
| O                     | 10.782000 | 2.793000  | 22.654000 | C | 27.137806 | 6.279499 | 25.749181 |
| Cu                    | 18.542292 | 6.090788  | 26.015348 | C | 27.644039 | 5.145859 | 25.080731 |
| Cu                    | 17.953626 | 3.701648  | 26.527818 | C | 29.039201 | 4.881929 | 25.134854 |
| C                     | 22.219064 | 3.967301  | 26.378334 | C | 13.900000 | 3.935000 | 24.313000 |
| C                     | 22.761183 | 3.200327  | 27.425304 | C | 28.704411 | 2.962992 | 23.684318 |
| C                     | 24.116793 | 2.897851  | 27.460051 | C | 27.337850 | 3.183819 | 23.658327 |
| C                     | 24.955346 | 3.350309  | 26.446609 | C | 26.782440 | 4.278701 | 24.358007 |
| C                     | 24.451311 | 4.094170  | 25.362695 | O | 26.567359 | 2.275848 | 22.934874 |
| C                     | 23.062947 | 4.389963  | 25.312325 | O | 16.595232 | 6.404862 | 25.849336 |
| C                     | 22.551170 | 5.065708  | 24.183667 | O | 16.057300 | 4.264936 | 26.318891 |
| C                     | 23.401058 | 5.478842  | 23.162499 | C | 15.736237 | 5.462567 | 25.983972 |
| C                     | 24.769388 | 5.231391  | 23.231709 |   |           |          |           |

|    |           |          |           |    |           |          |           |
|----|-----------|----------|-----------|----|-----------|----------|-----------|
| C  | 17.912051 | 5.817553 | 30.230894 | C  | 32.583748 | 5.274002 | 19.075771 |
| C  | 18.907194 | 6.569497 | 30.881146 | O  | 31.143743 | 7.185016 | 18.538835 |
| C  | 16.760120 | 5.405607 | 30.957722 | O  | 34.138470 | 5.532560 | 24.126684 |
| C  | 15.681108 | 4.748751 | 30.328479 | O  | 33.629797 | 3.386288 | 24.592552 |
| C  | 14.572923 | 4.345443 | 31.067266 | C  | 33.864657 | 4.334107 | 23.757375 |
| O  | 18.429063 | 6.407867 | 27.977330 | C  | 29.885001 | 5.736625 | 25.895630 |
| O  | 17.900257 | 4.261265 | 28.429230 | C  | 29.339160 | 6.873955 | 26.517199 |
| C  | 18.097185 | 5.475390 | 28.794784 | C  | 43.542355 | 6.861997 | 26.540780 |
| Cu | 34.148507 | 6.084025 | 26.035817 | C  | 42.722661 | 6.001107 | 25.822248 |
| Cu | 33.572342 | 3.697193 | 26.564103 | C  | 43.249961 | 4.879532 | 25.148763 |
| C  | 37.829226 | 3.940189 | 26.411588 | C  | 44.648160 | 4.629096 | 25.217400 |
| C  | 38.349905 | 3.226552 | 27.506629 | C  | 29.555172 | 3.794272 | 24.401552 |
| C  | 39.694397 | 2.883231 | 27.561310 | C  | 44.345756 | 2.706796 | 23.766015 |
| C  | 40.543201 | 3.238755 | 26.519264 | C  | 42.978515 | 2.924416 | 23.711513 |
| C  | 40.061358 | 3.930624 | 25.391613 | C  | 42.405313 | 4.016215 | 24.401694 |
| C  | 38.683757 | 4.271769 | 25.324039 | O  | 42.224903 | 2.012793 | 22.975222 |
| C  | 38.192649 | 4.901116 | 24.161170 | O  | 32.181503 | 6.399259 | 25.930844 |
| C  | 39.053610 | 5.218474 | 23.114786 | O  | 31.676679 | 4.250436 | 26.392818 |
| C  | 40.413409 | 4.927102 | 23.197762 | C  | 31.333342 | 5.446830 | 26.082883 |
| C  | 40.929580 | 4.275201 | 24.326358 | C  | 33.728830 | 5.822923 | 30.279624 |
| O  | 41.262479 | 5.255536 | 22.146678 | C  | 34.837518 | 6.461864 | 30.864060 |
| O  | 36.050188 | 5.513140 | 26.164358 | C  | 32.576937 | 5.563043 | 31.073097 |
| O  | 35.530878 | 3.375594 | 26.666907 | C  | 31.412013 | 4.995778 | 30.518965 |
| C  | 36.385242 | 4.299691 | 26.418597 | C  | 30.291387 | 4.774560 | 31.315454 |
| C  | 33.846854 | 4.021972 | 22.293718 | O  | 34.098469 | 6.399523 | 27.999373 |
| C  | 34.612831 | 2.940969 | 21.873683 | O  | 33.547961 | 4.263769 | 28.476082 |
| C  | 34.701781 | 2.637978 | 20.519678 | C  | 33.795495 | 5.472645 | 28.833144 |
| C  | 34.024753 | 3.416989 | 19.587708 | Cu | 49.689080 | 6.190571 | 25.991185 |
| C  | 33.259776 | 4.496991 | 20.007741 | Cu | 49.348574 | 3.768191 | 26.558982 |
| C  | 33.170826 | 4.799983 | 21.361747 | C  | 53.571003 | 4.464792 | 26.367939 |
| C  | 32.403848 | 5.880986 | 21.783781 | C  | 54.157058 | 3.947774 | 27.515902 |
| C  | 31.727821 | 6.658997 | 20.849810 | C  | 55.530059 | 3.732759 | 27.559826 |
| C  | 31.817771 | 6.355005 | 19.496805 | C  | 56.316002 | 4.036762 | 26.454787 |

|   |           |          |           |    |           |          |           |
|---|-----------|----------|-----------|----|-----------|----------|-----------|
| C | 55.729946 | 4.554780 | 25.305823 | C  | 47.070895 | 4.659764 | 30.375752 |
| C | 54.356947 | 4.768795 | 25.262899 | C  | 46.014883 | 4.169057 | 31.137203 |
| C | 53.770890 | 5.287813 | 24.113936 | O  | 49.595697 | 6.538499 | 27.948800 |
| C | 54.557834 | 5.591815 | 23.007897 | O  | 49.300543 | 4.358918 | 28.452256 |
| C | 55.929834 | 5.377800 | 23.052821 | C  | 49.378680 | 5.594243 | 28.790796 |
| C | 56.515889 | 4.858782 | 24.200784 | C  | 11.158286 | 7.260970 | 41.959133 |
| O | 56.643771 | 5.617805 | 21.841785 | C  | 10.287269 | 6.502976 | 41.186145 |
| O | 51.632463 | 5.830731 | 26.128880 | C  | 10.757253 | 5.394976 | 40.491133 |
| O | 51.339037 | 3.649386 | 26.627826 | C  | 12.099253 | 5.042971 | 40.571108 |
| C | 52.092636 | 4.660279 | 26.379538 | C  | 11.698221 | 3.178978 | 39.103109 |
| C | 49.466779 | 4.021876 | 22.293156 | C  | 10.356221 | 3.528983 | 39.024134 |
| C | 50.232745 | 2.940872 | 21.873104 | C  | 9.886237  | 4.637982 | 39.718146 |
| C | 50.321669 | 2.637885 | 20.519096 | O  | 9.453204  | 2.792989 | 38.218147 |
| C | 49.644627 | 3.416901 | 19.587140 | Cu | 17.246726 | 6.014777 | 41.482660 |
| C | 48.879661 | 4.496905 | 20.007192 | Cu | 16.613427 | 3.639518 | 41.998620 |
| C | 48.790737 | 4.799893 | 21.361200 | C  | 20.882007 | 3.796822 | 41.908770 |
| C | 48.023772 | 5.880897 | 21.783251 | C  | 21.355267 | 3.061651 | 43.011071 |
| C | 47.347731 | 6.658913 | 20.849295 | C  | 22.699529 | 2.731860 | 43.126385 |
| C | 47.437655 | 6.354926 | 19.496287 | C  | 23.597386 | 3.126605 | 42.141090 |
| C | 48.203620 | 5.273922 | 19.075235 | C  | 23.165470 | 3.837033 | 41.005986 |
| O | 46.763613 | 7.184943 | 18.538331 | C  | 21.786787 | 4.155183 | 40.870986 |
| O | 49.727742 | 5.586277 | 24.094643 | C  | 21.346477 | 4.792978 | 39.693412 |
| O | 49.388653 | 3.417223 | 24.603474 | C  | 22.256661 | 5.134624 | 38.696891 |
| C | 49.524596 | 4.364672 | 23.749624 | C  | 23.615687 | 4.871926 | 38.851587 |
| C | 45.477639 | 5.502497 | 25.973483 | C  | 24.082345 | 4.228708 | 40.003219 |
| C | 44.905924 | 6.618716 | 26.611583 | O  | 24.511405 | 5.224617 | 37.850557 |
| C | 45.181623 | 3.542626 | 24.496801 | O  | 19.134813 | 5.398547 | 41.618837 |
| O | 47.710175 | 6.314478 | 25.891723 | O  | 18.565241 | 3.269252 | 42.101044 |
| O | 47.396858 | 4.143456 | 26.416996 | C  | 19.442204 | 4.177862 | 41.873938 |
| C | 46.947680 | 5.303752 | 26.096877 | C  | 16.817670 | 4.006592 | 37.744767 |
| C | 49.180817 | 5.946713 | 30.222891 | C  | 17.487215 | 2.882460 | 37.230014 |
| C | 50.102283 | 6.810657 | 30.841826 | C  | 17.502099 | 2.626293 | 35.865446 |
| C | 48.081643 | 5.442859 | 30.973590 | C  | 16.846880 | 3.486732 | 34.990992 |

|   |           |          |           |    |           |          |           |
|---|-----------|----------|-----------|----|-----------|----------|-----------|
| C | 16.133747 | 4.607506 | 35.464811 | C  | 15.546775 | 5.259958 | 33.088372 |
| C | 16.098413 | 4.858554 | 36.862281 | O  | 13.395657 | 4.169795 | 33.164792 |
| C | 15.321905 | 5.932146 | 37.342765 | O  | 17.186831 | 6.327073 | 43.444960 |
| C | 14.641871 | 6.758816 | 36.457542 | O  | 16.605201 | 4.196689 | 43.906433 |
| C | 14.704005 | 6.552243 | 35.089598 | C  | 16.847624 | 5.404270 | 44.269368 |
| C | 15.457001 | 5.476021 | 34.568102 | Cu | 33.565939 | 6.658432 | 41.200527 |
| O | 14.019709 | 7.460243 | 34.284352 | Cu | 32.407896 | 3.935425 | 42.125893 |
| O | 17.221221 | 5.470866 | 39.575724 | C  | 36.538277 | 3.577736 | 41.380220 |
| O | 16.657497 | 3.334257 | 40.029766 | C  | 36.986880 | 2.641825 | 42.295215 |
| C | 16.905022 | 4.284657 | 39.202930 | C  | 38.350401 | 2.272544 | 42.322487 |
| C | 12.972270 | 5.800966 | 41.346096 | C  | 39.246979 | 2.841351 | 41.443694 |
| C | 12.500286 | 6.908965 | 42.040108 | C  | 38.829763 | 3.782373 | 40.446284 |
| C | 26.340749 | 6.875255 | 42.579675 | C  | 37.431827 | 4.130688 | 40.399364 |
| C | 25.638135 | 6.015334 | 41.761938 | C  | 36.990040 | 4.992026 | 39.354634 |
| C | 26.269240 | 4.937473 | 41.057729 | C  | 37.872692 | 5.508526 | 38.436931 |
| C | 27.690298 | 4.766553 | 41.240614 | C  | 39.262012 | 5.228160 | 38.520798 |
| C | 12.571237 | 3.934972 | 39.877096 | C  | 39.745040 | 4.373717 | 39.510630 |
| C | 27.638334 | 2.907006 | 39.674364 | O  | 40.122214 | 5.791044 | 37.628402 |
| C | 26.236776 | 3.056098 | 39.497691 | O  | 34.937001 | 5.301534 | 41.311785 |
| C | 25.544715 | 4.052742 | 40.179656 | O  | 34.238592 | 3.251572 | 41.883668 |
| O | 25.701048 | 2.143064 | 38.637332 | C  | 35.131318 | 4.071319 | 41.522756 |
| O | 15.291468 | 6.378827 | 41.368293 | C  | 31.957845 | 4.310292 | 38.053643 |
| O | 14.727026 | 4.246962 | 41.836577 | C  | 32.194867 | 3.005056 | 37.638443 |
| C | 14.415682 | 5.452844 | 41.523679 | C  | 32.209395 | 2.676941 | 36.270857 |
| C | 16.714205 | 5.757779 | 45.709369 | C  | 31.968672 | 3.647533 | 35.322371 |
| C | 17.744732 | 6.496890 | 46.319081 | C  | 31.687350 | 5.004625 | 35.679530 |
| C | 18.807171 | 6.865584 | 32.234480 | C  | 31.692204 | 5.343434 | 37.085010 |
| C | 17.709030 | 6.420437 | 32.962401 | C  | 31.413146 | 6.695103 | 37.444765 |
| C | 16.673479 | 5.691877 | 32.345875 | C  | 31.142503 | 7.640849 | 36.488734 |
| C | 15.569230 | 5.395476 | 46.472683 | C  | 31.134606 | 7.315235 | 35.107007 |
| C | 14.462570 | 4.744331 | 45.887665 | C  | 31.412435 | 6.016539 | 34.691205 |
| C | 13.361402 | 4.391775 | 46.661848 | O  | 30.845340 | 8.381291 | 34.301557 |
| C | 14.508431 | 4.579244 | 32.438547 | O  | 32.208194 | 5.711643 | 40.000532 |

|    |           |          |           |   |           |          |           |
|----|-----------|----------|-----------|---|-----------|----------|-----------|
| O  | 31.986351 | 3.517794 | 40.278054 | C | 52.828353 | 3.947597 | 43.079285 |
| C  | 32.049927 | 4.549781 | 39.529738 | C | 54.201353 | 3.732577 | 43.123183 |
| C  | 28.392122 | 5.686036 | 42.094432 | C | 54.987278 | 4.036581 | 42.018131 |
| C  | 27.728966 | 6.723749 | 42.739520 | C | 54.401203 | 4.554604 | 40.869180 |
| C  | 42.182161 | 6.870769 | 41.998177 | C | 53.028203 | 4.768624 | 40.826281 |
| C  | 41.410107 | 6.036287 | 41.198075 | C | 52.442128 | 5.287648 | 39.677330 |
| C  | 41.994974 | 4.993707 | 40.451863 | C | 53.229054 | 5.591652 | 38.571278 |
| C  | 43.398288 | 4.784331 | 40.543354 | C | 54.601054 | 5.377632 | 38.616177 |
| C  | 28.344810 | 3.728206 | 40.516381 | C | 55.187129 | 4.858609 | 39.764128 |
| C  | 43.199334 | 2.971924 | 38.940252 | O | 55.314970 | 5.617639 | 37.405129 |
| C  | 41.828278 | 3.151827 | 38.860295 | O | 50.334486 | 5.883989 | 41.712603 |
| C  | 41.207312 | 4.168035 | 39.612357 | O | 49.996265 | 3.702368 | 42.182229 |
| O  | 41.122314 | 2.285170 | 38.030416 | C | 50.769990 | 4.699336 | 41.950768 |
| O  | 30.409776 | 6.769493 | 42.516068 | C | 48.277234 | 4.260882 | 37.809598 |
| O  | 30.475296 | 4.527911 | 42.369416 | C | 49.095754 | 3.226998 | 37.321531 |
| C  | 29.849029 | 5.601011 | 42.324146 | C | 49.166378 | 2.956564 | 35.962011 |
| C  | 32.538951 | 6.125212 | 45.618444 | C | 48.417726 | 3.710960 | 35.065535 |
| C  | 33.303763 | 7.157247 | 46.132235 | C | 47.563042 | 4.740960 | 35.510992 |
| C  | 34.841827 | 6.796156 | 32.212079 | C | 47.477091 | 5.008765 | 36.903361 |
| C  | 33.730375 | 6.517733 | 32.999508 | C | 46.571630 | 5.989885 | 37.354792 |
| C  | 32.582324 | 5.917086 | 32.450856 | C | 45.810920 | 6.714584 | 36.446294 |
| C  | 31.501269 | 5.516338 | 46.404333 | C | 45.911890 | 6.489525 | 35.083560 |
| C  | 30.598826 | 4.554227 | 45.867769 | C | 46.793054 | 5.500326 | 34.590953 |
| C  | 29.586240 | 4.026853 | 46.631150 | O | 45.134012 | 7.294129 | 34.253547 |
| C  | 30.299451 | 5.106378 | 32.669043 | O | 48.450062 | 5.761198 | 39.649827 |
| C  | 31.437005 | 5.680815 | 33.246161 | O | 48.133446 | 3.570688 | 40.086761 |
| O  | 29.171115 | 4.883098 | 33.447731 | C | 48.287783 | 4.546844 | 39.268042 |
| O  | 32.916836 | 6.581356 | 43.313459 | C | 44.177325 | 5.620652 | 41.390810 |
| O  | 32.789860 | 4.447572 | 43.970899 | C | 43.552648 | 6.669753 | 42.088731 |
| C  | 32.788429 | 5.686096 | 44.212140 | C | 43.987679 | 3.773256 | 39.758832 |
| Cu | 48.395021 | 6.293165 | 41.561333 | O | 46.413812 | 6.445175 | 41.436520 |
| Cu | 48.017635 | 3.858048 | 42.052459 | O | 46.077945 | 4.253798 | 41.853218 |
| C  | 52.242278 | 4.464620 | 41.931334 | C | 45.642755 | 5.427547 | 41.568473 |



|    |           |          |           |   |           |          |           |
|----|-----------|----------|-----------|---|-----------|----------|-----------|
| C  | 47.841250 | 5.956925 | 45.773494 | C | 22.657528 | 4.632802 | 55.331525 |
| C  | 48.787719 | 6.787680 | 46.401366 | O | 22.932534 | 5.775964 | 53.224425 |
| C  | 49.982769 | 7.135642 | 32.187103 | O | 17.794927 | 5.618914 | 57.306102 |
| C  | 48.937202 | 6.608850 | 32.937760 | O | 17.313602 | 3.443693 | 57.665482 |
| C  | 47.975008 | 5.763113 | 32.353069 | C | 18.151242 | 4.398612 | 57.481531 |
| C  | 46.721472 | 5.488410 | 46.515042 | C | 15.678818 | 4.239758 | 53.320920 |
| C  | 45.692243 | 4.736326 | 45.910177 | C | 16.384596 | 3.127284 | 52.828133 |
| C  | 44.614549 | 4.281990 | 46.664048 | C | 16.428670 | 2.855487 | 51.468175 |
| C  | 45.934391 | 4.440664 | 32.500285 | C | 15.762128 | 3.684952 | 50.574261 |
| C  | 46.900637 | 5.245811 | 33.118392 | C | 15.022481 | 4.799375 | 51.021815 |
| O  | 44.874985 | 3.941821 | 33.249915 | C | 14.968149 | 5.074852 | 52.415170 |
| O  | 48.284712 | 6.583929 | 43.521976 | C | 14.175608 | 6.149019 | 52.866768 |
| O  | 47.915598 | 4.401973 | 43.962943 | C | 13.498458 | 6.952896 | 51.958340 |
| C  | 48.029762 | 5.625817 | 44.335453 | C | 13.569538 | 6.715726 | 50.595716 |
| C  | 9.830848  | 7.260896 | 57.522290 | C | 14.332255 | 5.633027 | 50.102421 |
| C  | 8.959816  | 6.502907 | 56.749315 | O | 12.881988 | 7.599734 | 49.766719 |
| C  | 9.429783  | 5.394908 | 56.054291 | O | 15.951176 | 5.675970 | 55.208144 |
| C  | 10.771783 | 5.042898 | 56.134241 | O | 15.445899 | 3.508359 | 55.574951 |
| C  | 10.370718 | 3.178911 | 54.666243 | C | 15.691585 | 4.491015 | 54.787284 |
| C  | 9.028718  | 3.528920 | 54.587293 | C | 11.644816 | 5.800887 | 56.909216 |
| C  | 8.558750  | 4.637919 | 55.281317 | C | 11.172849 | 6.908886 | 57.603240 |
| O  | 8.125684  | 2.792932 | 53.781319 | C | 25.332555 | 7.141068 | 57.566990 |
| Cu | 15.891611 | 6.152894 | 57.137415 | C | 24.492269 | 6.313842 | 56.831324 |
| Cu | 15.348382 | 3.735769 | 57.547375 | C | 24.998238 | 5.213185 | 56.109252 |
| C  | 19.601825 | 4.072637 | 57.434791 | C | 26.394079 | 4.948330 | 56.146359 |
| C  | 20.155608 | 3.294434 | 58.467213 | C | 11.243751 | 3.934900 | 55.440217 |
| C  | 21.509389 | 2.983213 | 58.477845 | C | 26.055011 | 3.097215 | 54.611853 |
| C  | 22.333447 | 3.435902 | 57.452964 | C | 24.688018 | 3.318659 | 54.599735 |
| C  | 21.817245 | 4.194759 | 56.384978 | C | 24.134546 | 4.380446 | 55.350061 |
| C  | 20.431381 | 4.504601 | 56.362272 | O | 23.914803 | 2.440745 | 53.842909 |
| C  | 19.906994 | 5.202954 | 55.253539 | O | 13.936446 | 6.438135 | 56.972630 |
| C  | 20.742605 | 5.618456 | 54.221627 | O | 13.439727 | 4.274325 | 57.366427 |
| C  | 22.109000 | 5.353815 | 54.262184 | C | 13.092448 | 5.478316 | 57.083157 |

|    |           |          |           |   |           |          |           |
|----|-----------|----------|-----------|---|-----------|----------|-----------|
| C  | 15.283046 | 5.695821 | 61.352095 | C | 31.688948 | 3.782151 | 50.563921 |
| C  | 16.314087 | 6.385804 | 61.978046 | C | 30.849610 | 4.839348 | 50.968608 |
| C  | 17.681759 | 6.835298 | 47.664372 | C | 30.704822 | 5.112558 | 52.356673 |
| C  | 16.584664 | 6.448554 | 48.425464 | C | 29.839472 | 6.148630 | 52.759285 |
| C  | 15.517682 | 5.730381 | 47.852413 | C | 29.158462 | 6.902060 | 51.808646 |
| C  | 14.198081 | 5.242825 | 62.095148 | C | 29.294403 | 6.646903 | 50.453796 |
| C  | 13.166040 | 4.552842 | 61.469196 | C | 30.146184 | 5.614813 | 50.014764 |
| C  | 12.083075 | 4.099846 | 62.213249 | O | 28.564505 | 7.448144 | 49.580521 |
| C  | 13.329244 | 4.675437 | 48.024859 | O | 31.541844 | 5.753107 | 55.202053 |
| C  | 14.394013 | 5.356768 | 48.630241 | O | 31.097183 | 3.568852 | 55.547261 |
| O  | 12.223467 | 4.314067 | 48.786551 | C | 31.334644 | 4.562356 | 54.769754 |
| O  | 15.752325 | 6.386956 | 59.110894 | C | 27.240995 | 5.770095 | 56.940649 |
| O  | 15.282648 | 4.211316 | 59.474280 | C | 26.693240 | 6.873455 | 57.620313 |
| C  | 15.445157 | 5.414622 | 59.891863 | C | 40.919201 | 6.957055 | 57.637256 |
| Cu | 31.488470 | 6.201132 | 57.140331 | C | 40.092268 | 6.148865 | 56.868506 |
| Cu | 30.975593 | 3.772872 | 57.524069 | C | 40.608333 | 5.060845 | 56.133859 |
| C  | 35.219199 | 4.131858 | 57.450457 | C | 42.004606 | 4.795000 | 56.185073 |
| C  | 35.761603 | 3.398419 | 58.521257 | C | 26.908228 | 3.895335 | 55.363551 |
| C  | 37.106569 | 3.053211 | 58.541163 | C | 41.684097 | 2.966766 | 54.621269 |
| C  | 37.933118 | 3.425214 | 57.486965 | C | 40.317341 | 3.192473 | 54.589387 |
| C  | 37.429755 | 4.142739 | 56.384663 | C | 39.753373 | 4.244570 | 55.346464 |
| C  | 36.052325 | 4.489830 | 56.354918 | O | 39.554305 | 2.322671 | 53.813291 |
| C  | 35.538828 | 5.149872 | 55.219097 | O | 29.521141 | 6.469209 | 57.005914 |
| C  | 36.377419 | 5.486692 | 54.160867 | O | 29.065478 | 4.286032 | 57.340976 |
| C  | 37.737155 | 5.186875 | 54.206118 | C | 28.694925 | 5.491420 | 57.101043 |
| C  | 38.275953 | 4.507178 | 55.307711 | C | 30.903120 | 5.695641 | 61.351269 |
| O  | 38.563878 | 5.535706 | 53.144250 | C | 31.934175 | 6.385618 | 61.977205 |
| O  | 33.404636 | 5.676056 | 57.285434 | C | 33.123873 | 7.571523 | 47.470457 |
| O  | 32.937303 | 3.499310 | 57.655509 | C | 32.173696 | 6.969835 | 48.268998 |
| C  | 33.768579 | 4.458471 | 57.473690 | C | 31.316127 | 5.936156 | 47.771047 |
| C  | 31.403076 | 4.312333 | 53.303475 | C | 29.818167 | 5.242646 | 62.094340 |
| C  | 32.199834 | 3.245027 | 52.850691 | C | 28.786113 | 4.552669 | 61.468405 |
| C  | 32.347780 | 2.988562 | 51.495087 | C | 27.703159 | 4.099675 | 62.212476 |

|    |           |          |           |   |           |          |           |
|----|-----------|----------|-----------|---|-----------|----------|-----------|
| C  | 29.430312 | 4.393382 | 47.993579 | O | 47.125684 | 5.802060 | 55.214260 |
| C  | 30.284346 | 5.333864 | 48.568174 | O | 46.817705 | 3.594260 | 55.563566 |
| O  | 28.444010 | 3.824696 | 48.739045 | C | 46.973684 | 4.601245 | 54.785098 |
| O  | 31.365997 | 6.407858 | 59.117030 | C | 42.841120 | 5.610648 | 56.995833 |
| O  | 30.894502 | 4.228860 | 59.456791 | C | 42.278906 | 6.692742 | 57.698716 |
| C  | 31.059512 | 5.427450 | 59.887716 | C | 42.528522 | 3.752656 | 55.396185 |
| Cu | 47.053556 | 6.251890 | 57.150511 | O | 45.080812 | 6.402857 | 57.022746 |
| Cu | 46.687893 | 3.795713 | 57.533723 | O | 44.742933 | 4.196785 | 57.348630 |
| C  | 50.914829 | 4.464394 | 57.493750 | C | 44.307582 | 5.384668 | 57.122697 |
| C  | 51.500923 | 3.947364 | 58.641689 | C | 46.523195 | 5.695406 | 61.350162 |
| C  | 52.873923 | 3.732339 | 58.685563 | C | 47.554262 | 6.385378 | 61.976082 |
| C  | 53.659830 | 4.036343 | 57.580498 | C | 48.667707 | 7.119483 | 47.744106 |
| C  | 53.073736 | 4.554373 | 56.431559 | C | 47.596885 | 6.632558 | 48.484339 |
| C  | 51.700736 | 4.768398 | 56.388685 | C | 46.613685 | 5.815596 | 47.892968 |
| C  | 51.114643 | 5.287428 | 55.239746 | C | 45.438253 | 5.242413 | 62.093251 |
| C  | 51.901549 | 5.591433 | 54.133681 | C | 44.406185 | 4.552442 | 61.467332 |
| C  | 53.273549 | 5.377407 | 54.178555 | C | 43.323243 | 4.099449 | 62.211421 |
| C  | 53.859642 | 4.858378 | 55.326493 | C | 44.532580 | 4.557535 | 48.026653 |
| O  | 53.987445 | 5.617415 | 52.967495 | C | 45.519526 | 5.331948 | 48.651931 |
| O  | 48.993096 | 5.859600 | 57.301232 | O | 43.452515 | 4.093082 | 48.768610 |
| O  | 48.673082 | 3.655857 | 57.671134 | O | 46.922718 | 6.444253 | 59.124141 |
| C  | 49.438590 | 4.672668 | 57.498686 | O | 46.572545 | 4.240223 | 59.461513 |
| C  | 46.981066 | 4.359166 | 53.319385 | C | 46.675379 | 5.444555 | 59.890881 |
| C  | 47.820976 | 3.350924 | 52.813548 | C | 16.262162 | 6.620790 | 63.347051 |
| C  | 47.878774 | 3.088120 | 51.452608 | C | 15.179196 | 6.168795 | 64.090104 |
| C  | 47.094477 | 3.823458 | 50.571951 | C | 14.147156 | 5.478812 | 63.465153 |
| C  | 46.224366 | 4.833592 | 51.034022 | C | 12.031150 | 4.336833 | 63.582254 |
| C  | 46.155195 | 5.096401 | 52.428499 | C | 13.063191 | 5.025817 | 64.207206 |
| C  | 45.238566 | 6.058170 | 52.897214 | O | 10.943187 | 3.908837 | 64.361307 |
| C  | 44.448474 | 6.768928 | 52.002613 | C | 31.882275 | 6.620600 | 63.346211 |
| C  | 44.530536 | 6.548199 | 50.637588 | C | 30.799322 | 6.168606 | 64.089282 |
| C  | 45.422470 | 5.577034 | 50.127870 | C | 29.767267 | 5.478629 | 63.464346 |
| O  | 43.729045 | 7.344900 | 49.822700 | C | 27.651260 | 4.336658 | 63.581482 |

|   |           |          |           |   |           |          |           |
|---|-----------|----------|-----------|---|-----------|----------|-----------|
| C | 28.683314 | 5.025635 | 64.206417 | H | 37.701428 | 2.944376 | 28.328382 |
| O | 26.563309 | 3.908663 | 64.360554 | H | 40.082321 | 2.339926 | 28.417429 |
| C | 47.502389 | 6.620356 | 63.345091 | H | 41.584542 | 2.956210 | 26.594873 |
| C | 46.419447 | 6.168363 | 64.088179 | H | 37.142769 | 5.146525 | 24.038523 |
| C | 45.387379 | 5.478391 | 63.463260 | H | 38.654192 | 5.703758 | 22.234532 |
| C | 43.271369 | 4.336426 | 63.580429 | H | 35.148926 | 2.328658 | 22.590961 |
| C | 44.303437 | 5.025398 | 64.205349 | H | 35.298495 | 1.793509 | 20.190361 |
| O | 42.183431 | 3.908432 | 64.359519 | H | 34.100014 | 3.170646 | 18.536493 |
| H | 12.119261 | 8.127156 | 26.935637 | H | 32.263219 | 6.143371 | 22.825845 |
| H | 10.573047 | 6.786885 | 25.566293 | H | 31.124508 | 7.499335 | 21.165091 |
| H | 13.383695 | 2.323362 | 22.982316 | H | 29.978628 | 7.546482 | 27.077427 |
| H | 9.847481  | 3.169829 | 22.676730 | H | 43.117562 | 7.726029 | 27.042232 |
| H | 22.122362 | 2.849899 | 28.228042 | H | 41.667397 | 6.230444 | 25.784519 |
| H | 24.522199 | 2.313810 | 28.280447 | H | 30.616077 | 3.577103 | 24.354616 |
| H | 26.006180 | 3.100901 | 26.507866 | H | 44.762196 | 1.869693 | 23.221904 |
| H | 21.492997 | 5.271672 | 24.064027 | H | 35.711190 | 6.689358 | 30.263508 |
| H | 22.984895 | 5.998736 | 22.310196 | H | 31.347974 | 4.726518 | 29.468664 |
| H | 19.532377 | 2.329791 | 22.589909 | H | 29.407934 | 4.339263 | 30.867694 |
| H | 19.679416 | 1.794137 | 20.190503 | H | 31.292319 | 6.861337 | 17.596277 |
| H | 18.480536 | 3.170847 | 18.536725 | H | 40.784957 | 5.750658 | 21.408512 |
| H | 16.650844 | 6.145023 | 22.827103 | H | 41.242762 | 2.229551 | 22.967861 |
| H | 15.506775 | 7.500935 | 21.165124 | H | 53.552002 | 3.699229 | 28.381025 |
| H | 14.495563 | 7.508342 | 27.087417 | H | 55.987690 | 3.325955 | 28.455676 |
| H | 27.570455 | 8.018045 | 26.938367 | H | 57.384061 | 3.866295 | 26.497843 |
| H | 26.083891 | 6.517671 | 25.720596 | H | 52.703436 | 5.453370 | 24.015659 |
| H | 14.941549 | 3.634141 | 24.311438 | H | 54.081178 | 5.976339 | 22.116911 |
| H | 29.108443 | 2.126652 | 23.129657 | H | 50.777423 | 2.334581 | 22.589167 |
| H | 19.775048 | 6.912954 | 30.329592 | H | 50.920848 | 1.795227 | 20.189768 |
| H | 15.668802 | 4.551122 | 29.261812 | H | 49.720380 | 3.170955 | 18.535929 |
| H | 13.759613 | 3.841721 | 30.562629 | H | 47.863576 | 6.134732 | 22.823889 |
| H | 15.672013 | 6.861269 | 17.596333 | H | 46.741273 | 7.496888 | 21.164843 |
| H | 25.111961 | 6.163893 | 21.490531 | H | 45.531744 | 7.304385 | 27.171609 |
| H | 25.586646 | 2.499046 | 22.939460 | H | 46.243740 | 3.327113 | 24.475131 |

|                                |                                |
|--------------------------------|--------------------------------|
| H 50.927023 7.222578 30.271467 | H 36.280617 2.222830 43.016374 |
| H 47.071176 4.426539 29.316571 | H 38.699564 1.544316 43.061290 |
| H 45.254762 3.567937 30.656865 | H 40.301237 2.553939 41.507829 |
| H 46.913295 6.862043 17.595725 | H 35.933662 5.243653 39.270625 |
| H 56.056245 5.977134 21.104084 | H 37.505452 6.159596 37.634535 |
| H 10.790779 8.127541 42.499181 | H 32.388461 2.240361 38.392473 |
| H 9.244406 6.786971 41.130131  | H 32.417867 1.648304 35.960497 |
| H 12.055582 2.325670 38.543149 | H 31.995902 3.352774 34.268470 |
| H 8.519316 3.171092 38.239705  | H 31.427780 6.978569 38.494648 |
| H 20.670767 2.758589 43.795511 | H 30.925480 8.675936 36.766753 |
| H 23.050345 2.174047 43.989242 | H 28.281579 7.417387 43.375446 |
| H 24.638441 2.856830 42.265608 | H 41.713650 7.678545 42.551959 |
| H 20.298841 5.019713 39.519562 | H 40.345821 6.225811 41.154029 |
| H 21.894569 5.618820 37.799624 | H 29.419382 3.579764 40.619567 |
| H 18.014905 2.211272 37.897864 | H 43.659275 2.195501 38.342987 |
| H 18.030870 1.759784 35.480990 | H 34.054498 7.635212 45.497335 |
| H 16.884915 3.256818 33.935583 | H 35.712141 7.274892 32.650423 |
| H 15.214779 6.141831 38.400996 | H 33.771308 6.787283 34.047332 |
| H 14.051245 7.583051 36.834561 | H 30.696084 4.233155 44.832373 |
| H 13.169664 7.508077 42.648176 | H 28.892802 3.302180 46.188230 |
| H 25.827040 7.688590 43.100419 | H 28.429490 4.432660 32.932105 |
| H 24.562504 6.185991 41.652623 | H 30.819028 8.145942 33.360918 |
| H 13.612234 3.635575 39.862035 | H 39.638400 6.386801 37.033788 |
| H 28.140619 2.118881 39.107464 | H 40.131480 2.473292 38.008582 |
| H 18.608645 6.803328 45.740081 | H 52.223536 3.704744 43.946086 |
| H 19.588477 7.438036 32.724710 | H 54.659171 3.326962 44.019441 |
| H 17.666100 6.664557 34.015294 | H 56.055358 3.866319 42.061099 |
| H 14.423687 4.509708 44.829365 | H 51.374793 5.453812 39.579512 |
| H 12.527508 3.888712 46.191331 | H 52.752290 5.975901 37.680118 |
| H 12.732320 3.663711 32.597356 | H 49.693585 2.637377 38.007277 |
| H 14.082666 7.242878 33.304403 | H 49.808527 2.160135 35.599292 |
| H 24.070301 5.738159 37.101233 | H 48.499440 3.470024 34.015232 |
| H 24.757130 2.292250 38.472555 | H 46.426021 6.204333 38.407449 |

|   |           |          |           |   |           |          |           |
|---|-----------|----------|-----------|---|-----------|----------|-----------|
| H | 45.121391 | 7.469054 | 36.800886 | H | 13.130156 | 4.374967 | 60.400624 |
| H | 44.139578 | 7.328647 | 42.718665 | H | 11.277971 | 3.574178 | 61.719332 |
| H | 45.057469 | 3.593596 | 39.753793 | H | 11.541391 | 3.797859 | 48.251450 |
| H | 49.628838 | 7.174559 | 45.837305 | H | 12.970102 | 7.373865 | 48.790637 |
| H | 50.707036 | 7.796590 | 32.652991 | H | 22.432523 | 6.312040 | 52.531041 |
| H | 48.876116 | 6.879983 | 33.983175 | H | 22.933871 | 2.662047 | 53.863046 |
| H | 45.695877 | 4.499186 | 44.851774 | H | 35.127799 | 3.095257 | 59.346797 |
| H | 43.839762 | 3.703996 | 46.178785 | H | 37.511163 | 2.490620 | 59.376680 |
| H | 44.263588 | 3.351108 | 32.706461 | H | 38.974118 | 3.135253 | 57.532446 |
| H | 45.237837 | 7.070734 | 33.278506 | H | 34.488695 | 5.406855 | 55.127832 |
| H | 54.726571 | 5.972541 | 36.665832 | H | 35.961074 | 5.993667 | 53.300844 |
| H | 9.463395  | 8.127098 | 58.062878 | H | 32.722022 | 2.616218 | 53.563151 |
| H | 7.916948  | 6.786723 | 56.693559 | H | 32.976625 | 2.168406 | 51.162649 |
| H | 10.728094 | 2.325312 | 54.106791 | H | 31.828985 | 3.548735 | 49.516906 |
| H | 7.191493  | 3.170138 | 53.804085 | H | 29.662788 | 6.381855 | 53.804088 |
| H | 19.526153 | 2.937081 | 59.274234 | H | 28.493010 | 7.694434 | 52.125763 |
| H | 21.923948 | 2.388608 | 59.285887 | H | 27.332476 | 7.519964 | 58.210800 |
| H | 23.382649 | 3.175743 | 57.493055 | H | 40.502816 | 7.795286 | 58.187034 |
| H | 18.850014 | 5.427345 | 55.159407 | H | 39.040340 | 6.393690 | 56.840487 |
| H | 20.317221 | 6.154882 | 53.384230 | H | 27.969116 | 3.680943 | 55.304476 |
| H | 16.910223 | 2.470637 | 53.512068 | H | 42.093704 | 2.163899 | 54.023021 |
| H | 16.982317 | 1.995966 | 51.103391 | H | 32.786972 | 6.742028 | 61.409450 |
| H | 15.816946 | 3.437115 | 49.523841 | H | 33.744126 | 8.376619 | 47.875887 |
| H | 14.055075 | 6.379089 | 53.919089 | H | 32.061694 | 7.313118 | 49.302174 |
| H | 12.899279 | 7.780877 | 52.312901 | H | 28.750139 | 4.374093 | 60.400036 |
| H | 11.840426 | 7.509559 | 58.212158 | H | 26.897802 | 3.574388 | 61.718471 |
| H | 24.924478 | 7.991132 | 58.104736 | H | 27.954482 | 3.180001 | 48.202920 |
| H | 23.438440 | 6.553099 | 56.816910 | H | 28.649805 | 7.165723 | 48.616007 |
| H | 12.285092 | 3.636258 | 55.427417 | H | 38.073919 | 6.049752 | 52.427276 |
| H | 26.457415 | 2.286941 | 54.018741 | H | 38.574746 | 2.549784 | 53.815888 |
| H | 17.168032 | 6.740075 | 61.410633 | H | 50.894986 | 3.700168 | 59.506400 |
| H | 18.489127 | 7.399113 | 48.121429 | H | 53.331574 | 3.325571 | 59.581317 |
| H | 16.569254 | 6.727730 | 49.470335 | H | 54.727850 | 3.865774 | 57.623152 |

|   |           |          |           |   |           |           |           |
|---|-----------|----------|-----------|---|-----------|-----------|-----------|
| H | 50.047627 | 5.459282 | 55.145273 | H | 7.520566  | 4.915566  | 55.216450 |
| H | 51.424909 | 5.976997 | 53.242980 | H | 12.998924 | 5.199012  | 65.269015 |
| H | 48.437628 | 2.767939 | 53.488212 | H | 28.618755 | 5.199002  | 65.268145 |
| H | 48.533420 | 2.307979 | 51.077036 | H | 44.238627 | 5.198840  | 65.267025 |
| H | 47.162066 | 3.582891 | 49.520746 | H | 48.273987 | 5.043191  | 18.026061 |
| H | 45.108719 | 6.269109 | 53.952769 | C | 32.011617 | 9.050811  | 40.865779 |
| H | 43.750745 | 7.509600 | 52.370049 | C | 31.863091 | 9.612237  | 42.305607 |
| H | 42.909549 | 7.334852 | 58.303197 | C | 32.902641 | 10.723093 | 42.555623 |
| H | 43.589700 | 3.535872 | 55.352618 | C | 32.807571 | 11.838116 | 41.504705 |
| H | 48.405664 | 6.744700 | 61.407943 | C | 32.966124 | 11.273870 | 40.083204 |
| H | 49.408952 | 7.757581 | 48.215089 | C | 31.936488 | 10.170074 | 39.806225 |
| H | 47.533752 | 6.912101 | 49.527266 | O | 33.223077 | 8.386123  | 40.740465 |
| H | 44.381214 | 4.364582 | 60.399365 | C | 29.763498 | 9.765791  | 43.699176 |
| H | 42.519299 | 3.571684 | 61.717718 | C | 28.402872 | 10.157433 | 43.762413 |
| H | 42.823777 | 3.525826 | 48.219777 | C | 27.622723 | 9.877750  | 44.883599 |
| H | 43.818675 | 7.124639 | 48.845709 | C | 28.161192 | 9.199476  | 45.985938 |
| H | 53.398846 | 5.971261 | 52.227764 | C | 29.506861 | 8.817713  | 45.936781 |
| H | 17.068190 | 7.158131 | 63.835998 | C | 30.301954 | 9.095150  | 44.823096 |
| H | 15.148064 | 6.357335 | 65.155541 | N | 30.497332 | 10.033866 | 42.565848 |
| H | 10.262991 | 3.421938 | 63.797143 | H | 32.765933 | 11.126896 | 43.575364 |
| H | 32.687889 | 7.158639 | 63.835006 | H | 32.091848 | 8.774795  | 42.974716 |
| H | 30.767919 | 6.357402 | 65.154645 | H | 31.172727 | 8.345112  | 40.683817 |
| H | 25.881470 | 3.424746 | 63.795710 | H | 33.572943 | 12.611908 | 41.698830 |
| H | 48.307505 | 7.159160 | 63.833750 | H | 31.823734 | 12.341183 | 41.594819 |
| H | 46.387772 | 6.357321 | 65.153486 | H | 32.872940 | 12.080998 | 39.332864 |
| H | 41.501118 | 3.425241 | 63.794509 | H | 33.978146 | 10.842601 | 39.974293 |
| H | 54.922554 | 4.682827 | 55.325772 | H | 30.914332 | 10.599863 | 39.797443 |
| H | 56.250085 | 4.683170 | 39.763679 | H | 32.099153 | 9.712296  | 38.814329 |
| H | 57.578888 | 4.683442 | 24.200623 | H | 33.905646 | 10.261072 | 42.508972 |
| H | 32.654288 | 5.043390 | 18.026527 | H | 27.959624 | 10.678987 | 42.906235 |
| H | 17.034821 | 5.043621 | 18.026679 | H | 26.574387 | 10.196430 | 44.894325 |
| H | 10.176558 | 4.915311 | 24.089595 | H | 27.546838 | 8.988565  | 46.866422 |
| H | 8.847995  | 4.915583 | 39.653294 | H | 29.968847 | 8.294962  | 46.780629 |

|   |           |           |           |    |           |          |           |
|---|-----------|-----------|-----------|----|-----------|----------|-----------|
| H | 31.345603 | 8.778620  | 44.833313 | C  | 17.639888 | 4.497024 | 20.008011 |
| H | 31.377714 | 6.711067  | 42.767637 | C  | 17.550913 | 4.800019 | 21.362013 |
| H | 30.011954 | 10.518397 | 41.821286 | C  | 16.783924 | 5.881020 | 21.784030 |
|   |           |           |           | C  | 16.107910 | 6.659026 | 20.850045 |
|   |           |           |           | C  | 16.197885 | 6.355031 | 19.497042 |
|   |           |           |           | C  | 16.963875 | 5.274030 | 19.076025 |
|   |           |           |           | O  | 15.523872 | 7.185037 | 18.539057 |
|   |           |           |           | O  | 18.563859 | 5.528167 | 24.115476 |
|   |           |           |           | O  | 18.018906 | 3.386346 | 24.571118 |
|   |           |           |           | C  | 18.263246 | 4.335812 | 23.745673 |
|   |           |           |           | C  | 14.301000 | 5.801000 | 25.782000 |
|   |           |           |           | C  | 13.829000 | 6.909000 | 26.476000 |
|   |           |           |           | C  | 27.990830 | 7.117834 | 26.500668 |
|   |           |           |           | C  | 27.149305 | 6.263947 | 25.795649 |
|   |           |           |           | C  | 27.655099 | 5.139498 | 25.111794 |
|   |           |           |           | C  | 29.050401 | 4.874319 | 25.162711 |
|   |           |           |           | C  | 13.900000 | 3.935000 | 24.313000 |
|   |           |           |           | C  | 28.713628 | 2.970006 | 23.693390 |
|   |           |           |           | C  | 27.347542 | 3.193831 | 23.667285 |
|   |           |           |           | C  | 26.792871 | 4.282427 | 24.377425 |
|   |           |           |           | O  | 26.576665 | 2.294766 | 22.933125 |
|   |           |           |           | O  | 16.597365 | 6.399706 | 25.858723 |
|   |           |           |           | O  | 16.054996 | 4.259538 | 26.320887 |
|   |           |           |           | C  | 15.736084 | 5.458837 | 25.988396 |
|   |           |           |           | C  | 17.930646 | 5.782632 | 30.242919 |
|   |           |           |           | C  | 18.919686 | 6.550408 | 30.884483 |
|   |           |           |           | C  | 16.796807 | 5.344681 | 30.983825 |
|   |           |           |           | C  | 15.722305 | 4.668938 | 30.366831 |
|   |           |           |           | C  | 14.633195 | 4.239683 | 31.118945 |
|   |           |           |           | O  | 18.433995 | 6.387090 | 27.987830 |
|   |           |           |           | O  | 17.905541 | 4.238735 | 28.429534 |
|   |           |           |           | C  | 18.105105 | 5.450198 | 28.801968 |
|   |           |           |           | Cu | 34.164765 | 6.056132 | 26.048024 |

(*R,R*)-2-Int3-2

|    |           |          |           |
|----|-----------|----------|-----------|
| C  | 12.487000 | 7.261000 | 26.395000 |
| C  | 11.616000 | 6.503000 | 25.622000 |
| C  | 12.086000 | 5.395000 | 24.927000 |
| C  | 13.428000 | 5.043000 | 25.007000 |
| C  | 13.027000 | 3.179000 | 23.539000 |
| C  | 11.685000 | 3.529000 | 23.460000 |
| C  | 11.215000 | 4.638000 | 24.154000 |
| O  | 10.782000 | 2.793000 | 22.654000 |
| Cu | 18.544060 | 6.079470 | 26.022704 |
| Cu | 17.951638 | 3.689634 | 26.525167 |
| C  | 22.219287 | 3.948707 | 26.373785 |
| C  | 22.757839 | 3.171446 | 27.415060 |
| C  | 24.114139 | 2.872554 | 27.454487 |
| C  | 24.957128 | 3.337924 | 26.450809 |
| C  | 24.457045 | 4.090412 | 25.371224 |
| C  | 23.068020 | 4.383432 | 25.316214 |
| C  | 22.560827 | 5.068367 | 24.191133 |
| C  | 23.415458 | 5.493121 | 23.178609 |
| C  | 24.784140 | 5.248143 | 23.252893 |
| C  | 25.316495 | 4.536884 | 24.336751 |
| O  | 25.625524 | 5.674316 | 22.231075 |
| O  | 20.435186 | 5.513732 | 26.191515 |
| O  | 19.916385 | 3.364366 | 26.639954 |
| C  | 20.771223 | 4.295417 | 26.410908 |
| C  | 18.226927 | 4.022014 | 22.293999 |
| C  | 18.992915 | 2.941012 | 21.873981 |
| C  | 19.081890 | 2.638017 | 20.519979 |
| C  | 18.404876 | 3.417023 | 19.587993 |



|    |           |          |           |    |           |          |           |
|----|-----------|----------|-----------|----|-----------|----------|-----------|
| Cu | 33.582834 | 3.667539 | 26.562612 | C  | 43.256628 | 4.858706 | 25.148136 |
| C  | 37.838150 | 3.893076 | 26.394198 | C  | 44.655771 | 4.615609 | 25.216513 |
| C  | 38.355045 | 3.165282 | 27.481935 | C  | 29.565073 | 3.792996 | 24.419101 |
| C  | 39.698630 | 2.818183 | 27.535232 | C  | 44.364071 | 2.693302 | 23.762658 |
| C  | 40.550383 | 3.185716 | 26.499807 | C  | 42.995878 | 2.904243 | 23.707811 |
| C  | 40.071494 | 3.890929 | 25.379063 | C  | 42.417399 | 3.992531 | 24.398753 |
| C  | 38.694635 | 4.233959 | 25.311899 | O  | 42.246603 | 1.990264 | 22.970020 |
| C  | 38.205861 | 4.873877 | 24.153868 | O  | 32.196833 | 6.380367 | 25.964028 |
| C  | 39.068658 | 5.199777 | 23.111980 | O  | 31.688515 | 4.229453 | 26.412044 |
| C  | 40.428342 | 4.908709 | 23.195952 | C  | 31.346674 | 5.428831 | 26.112688 |
| C  | 40.941799 | 4.246870 | 24.319851 | C  | 33.852177 | 5.746628 | 30.295110 |
| O  | 41.280225 | 5.249172 | 22.151121 | C  | 35.000371 | 6.344770 | 30.845751 |
| O  | 36.064735 | 5.474148 | 26.156333 | C  | 32.728160 | 5.497222 | 31.128978 |
| O  | 35.539193 | 3.335543 | 26.647969 | C  | 31.528602 | 4.969526 | 30.611530 |
| C  | 36.395947 | 4.257944 | 26.403425 | C  | 30.433618 | 4.765581 | 31.447388 |
| C  | 33.846854 | 4.021972 | 22.293718 | O  | 34.142187 | 6.353760 | 28.013472 |
| C  | 34.612831 | 2.940969 | 21.873683 | O  | 33.583963 | 4.217247 | 28.479132 |
| C  | 34.701781 | 2.637978 | 20.519678 | C  | 33.856217 | 5.418517 | 28.843443 |
| C  | 34.024753 | 3.416989 | 19.587708 | Cu | 49.689242 | 6.188410 | 25.992639 |
| C  | 33.259776 | 4.496991 | 20.007741 | Cu | 49.351337 | 3.765307 | 26.559661 |
| C  | 33.170826 | 4.799983 | 21.361747 | C  | 53.571003 | 4.464792 | 26.367939 |
| C  | 32.403848 | 5.880986 | 21.783781 | C  | 54.157058 | 3.947774 | 27.515902 |
| C  | 31.727821 | 6.658997 | 20.849810 | C  | 55.530059 | 3.732759 | 27.559826 |
| C  | 31.817771 | 6.355005 | 19.496805 | C  | 56.316002 | 4.036762 | 26.454787 |
| C  | 32.583748 | 5.274002 | 19.075771 | C  | 55.729946 | 4.554780 | 25.305823 |
| O  | 31.143743 | 7.185016 | 18.538835 | C  | 54.356947 | 4.768795 | 25.262899 |
| O  | 34.135289 | 5.522642 | 24.134588 | C  | 53.770890 | 5.287813 | 24.113936 |
| O  | 33.624115 | 3.374181 | 24.587966 | C  | 54.557834 | 5.591815 | 23.007897 |
| C  | 33.859834 | 4.326995 | 23.758453 | C  | 55.929834 | 5.377800 | 23.052821 |
| C  | 29.897588 | 5.721152 | 25.931331 | C  | 56.515889 | 4.858782 | 24.200784 |
| C  | 29.352187 | 6.851410 | 26.565952 | O  | 56.643771 | 5.617805 | 21.841785 |
| C  | 43.538296 | 6.841821 | 26.541692 | O  | 51.632520 | 5.829756 | 26.129138 |
| C  | 42.723014 | 5.976128 | 25.823850 | O  | 51.340879 | 3.647867 | 26.627325 |

|   |           |          |           |    |           |          |           |
|---|-----------|----------|-----------|----|-----------|----------|-----------|
| C | 52.093284 | 4.659485 | 26.379349 | C  | 11.698221 | 3.178978 | 39.103109 |
| C | 49.466779 | 4.021876 | 22.293156 | C  | 10.356221 | 3.528983 | 39.024134 |
| C | 50.232745 | 2.940872 | 21.873104 | C  | 9.886237  | 4.637982 | 39.718146 |
| C | 50.321669 | 2.637885 | 20.519096 | O  | 9.453204  | 2.792989 | 38.218147 |
| C | 49.644627 | 3.416901 | 19.587140 | Cu | 17.239126 | 5.946272 | 41.544520 |
| C | 48.879661 | 4.496905 | 20.007192 | Cu | 16.556875 | 3.582656 | 42.056324 |
| C | 48.790737 | 4.799893 | 21.361200 | C  | 20.820018 | 3.660263 | 42.002157 |
| C | 48.023772 | 5.880897 | 21.783251 | C  | 21.286897 | 2.928097 | 43.108474 |
| C | 47.347731 | 6.658913 | 20.849295 | C  | 22.626515 | 2.577680 | 43.217892 |
| C | 47.437655 | 6.354926 | 19.496287 | C  | 23.524464 | 2.950964 | 42.223406 |
| C | 48.203620 | 5.273922 | 19.075235 | C  | 23.095145 | 3.656846 | 41.084355 |
| O | 46.763613 | 7.184943 | 18.538331 | C  | 21.721027 | 3.992122 | 40.954358 |
| O | 49.727068 | 5.585619 | 24.095564 | C  | 21.279843 | 4.621791 | 39.772218 |
| O | 49.390246 | 3.416036 | 24.603499 | C  | 22.186843 | 4.943145 | 38.767417 |
| C | 49.524711 | 4.364091 | 23.749954 | C  | 23.543452 | 4.668858 | 38.918504 |
| C | 45.480162 | 5.492754 | 25.973398 | C  | 24.009155 | 4.029476 | 40.073198 |
| C | 44.903264 | 6.606362 | 26.611150 | O  | 24.437595 | 5.007008 | 37.910955 |
| C | 45.195193 | 3.532674 | 24.494664 | O  | 19.109679 | 5.294665 | 41.711139 |
| O | 47.710440 | 6.310491 | 25.894285 | O  | 18.496418 | 3.175437 | 42.186931 |
| O | 47.400418 | 4.138828 | 26.419402 | C  | 19.390580 | 4.068203 | 41.968106 |
| C | 46.949846 | 5.298281 | 26.099017 | C  | 16.831942 | 3.936479 | 37.804671 |
| C | 49.182794 | 5.942522 | 30.223917 | C  | 17.496995 | 2.804223 | 37.302160 |
| C | 50.108352 | 6.800085 | 30.845400 | C  | 17.526889 | 2.543245 | 35.938660 |
| C | 48.077525 | 5.446813 | 30.970979 | C  | 16.889676 | 3.405930 | 35.053025 |
| C | 47.065951 | 4.666749 | 30.370826 | C  | 16.181816 | 4.535185 | 35.514027 |
| C | 46.004363 | 4.183213 | 31.128951 | C  | 16.134452 | 4.793751 | 36.910016 |
| O | 49.597091 | 6.534905 | 27.950404 | C  | 15.368026 | 5.880641 | 37.376660 |
| O | 49.303978 | 4.354827 | 28.453386 | C  | 14.708786 | 6.711713 | 36.480033 |
| C | 49.381380 | 5.590126 | 28.792131 | C  | 14.779927 | 6.495040 | 35.114098 |
| C | 11.158286 | 7.260970 | 41.959133 | C  | 15.522461 | 5.405217 | 34.606185 |
| C | 10.287269 | 6.502976 | 41.186145 | O  | 14.112816 | 7.405108 | 34.296756 |
| C | 10.757253 | 5.394976 | 40.491133 | O  | 17.232738 | 5.398082 | 39.638383 |
| C | 12.099253 | 5.042971 | 40.571108 | O  | 16.623933 | 3.272976 | 40.088480 |

|    |           |          |           |   |           |          |           |
|----|-----------|----------|-----------|---|-----------|----------|-----------|
| C  | 16.901155 | 4.216727 | 39.263429 | C | 38.506151 | 2.505695 | 42.360486 |
| C  | 12.972270 | 5.800966 | 41.346096 | C | 39.358995 | 3.044676 | 41.421117 |
| C  | 12.500286 | 6.908965 | 42.040108 | C | 38.903512 | 3.992483 | 40.446862 |
| C  | 26.367588 | 6.713793 | 42.540958 | C | 37.518236 | 4.378510 | 40.490210 |
| C  | 25.616604 | 5.811624 | 41.816888 | C | 37.021376 | 5.240001 | 39.470554 |
| C  | 26.216418 | 4.750797 | 41.059513 | C | 37.847795 | 5.714235 | 38.480452 |
| C  | 27.648600 | 4.633890 | 41.121061 | C | 39.234487 | 5.402999 | 38.476297 |
| C  | 12.571237 | 3.934972 | 39.877096 | C | 39.767025 | 4.558226 | 39.447992 |
| C  | 27.556556 | 2.711077 | 39.640091 | O | 40.046023 | 5.934682 | 37.520392 |
| C  | 26.144557 | 2.839869 | 39.534350 | O | 35.180065 | 5.653800 | 41.696780 |
| C  | 25.468775 | 3.835431 | 40.235509 | O | 34.373992 | 3.561182 | 41.948770 |
| O  | 25.581581 | 1.909008 | 38.710257 | C | 35.298439 | 4.395469 | 41.733597 |
| O  | 15.295834 | 6.345723 | 41.399238 | C | 32.242651 | 4.129244 | 38.116617 |
| O  | 14.689103 | 4.224575 | 41.866618 | C | 32.338119 | 2.811390 | 37.689646 |
| C  | 14.404268 | 5.434164 | 41.545154 | C | 32.293574 | 2.500714 | 36.318204 |
| C  | 16.639330 | 5.707738 | 45.761994 | C | 32.112799 | 3.501214 | 35.386855 |
| C  | 17.674075 | 6.429337 | 46.385101 | C | 31.958133 | 4.873937 | 35.763284 |
| C  | 18.832283 | 6.837921 | 32.240660 | C | 32.052666 | 5.197406 | 37.168623 |
| C  | 17.752357 | 6.369202 | 32.980813 | C | 31.926905 | 6.567121 | 37.549170 |
| C  | 16.722367 | 5.624904 | 32.374342 | C | 31.688300 | 7.540472 | 36.613025 |
| C  | 15.479548 | 5.362417 | 46.510341 | C | 31.573760 | 7.229128 | 35.233370 |
| C  | 14.369349 | 4.731160 | 45.910475 | C | 31.723864 | 5.915799 | 34.796178 |
| C  | 13.255348 | 4.390845 | 46.671713 | O | 31.332268 | 8.323238 | 34.449956 |
| C  | 14.580187 | 4.471088 | 32.491007 | O | 32.726131 | 5.466406 | 40.057341 |
| C  | 15.611406 | 5.173395 | 33.128804 | O | 32.056396 | 3.384458 | 40.363788 |
| O  | 13.484483 | 4.038674 | 33.229763 | C | 32.351587 | 4.351571 | 39.587075 |
| O  | 17.154375 | 6.264424 | 43.504309 | C | 28.391283 | 5.618025 | 41.845302 |
| O  | 16.530586 | 4.144888 | 43.961803 | C | 27.778123 | 6.646591 | 42.532019 |
| C  | 16.787355 | 5.349287 | 44.325260 | C | 42.206205 | 6.953767 | 42.024547 |
| Cu | 33.656430 | 6.831931 | 41.551278 | C | 41.437217 | 6.171174 | 41.171274 |
| Cu | 32.492641 | 4.087829 | 42.153242 | C | 42.019799 | 5.154159 | 40.387796 |
| C  | 36.680837 | 3.859654 | 41.531439 | C | 43.419291 | 4.927741 | 40.483884 |
| C  | 37.154490 | 2.913780 | 42.420618 | C | 28.289851 | 3.582532 | 40.403164 |

|    |           |          |           |   |           |          |           |
|----|-----------|----------|-----------|---|-----------|----------|-----------|
| C  | 43.224773 | 3.202855 | 38.786968 | O | 55.314970 | 5.617639 | 37.405129 |
| C  | 41.854231 | 3.390985 | 38.709166 | O | 50.347716 | 5.899910 | 41.715331 |
| C  | 41.233077 | 4.369852 | 39.508912 | O | 49.987692 | 3.721068 | 42.181252 |
| O  | 41.147799 | 2.561814 | 37.842333 | C | 50.771540 | 4.711010 | 41.952475 |
| O  | 30.336906 | 6.524549 | 40.942593 | C | 48.284029 | 4.305873 | 37.802880 |
| O  | 30.563225 | 4.737482 | 42.300944 | C | 49.102507 | 3.271184 | 37.316045 |
| C  | 29.873472 | 5.589895 | 41.731263 | C | 49.162773 | 2.989424 | 35.958341 |
| C  | 32.554817 | 6.305209 | 45.701172 | C | 48.405035 | 3.734253 | 35.061840 |
| C  | 33.360009 | 7.268832 | 46.283445 | C | 47.552973 | 4.767141 | 35.505332 |
| C  | 35.070192 | 6.646313 | 32.199175 | C | 47.476557 | 5.045752 | 36.896469 |
| C  | 33.985996 | 6.376601 | 33.025680 | C | 46.572252 | 6.028132 | 37.346607 |
| C  | 32.799245 | 5.821131 | 32.511706 | C | 45.799491 | 6.740102 | 36.438050 |
| C  | 31.485866 | 5.696451 | 46.442146 | C | 45.891812 | 6.505356 | 35.076028 |
| C  | 30.550085 | 4.805696 | 45.842589 | C | 46.775956 | 5.518254 | 34.584280 |
| C  | 29.521866 | 4.262590 | 46.573637 | O | 45.105153 | 7.300953 | 34.245617 |
| C  | 30.503128 | 5.074292 | 32.804900 | O | 48.463793 | 5.804122 | 39.647327 |
| C  | 31.680193 | 5.601359 | 33.347351 | O | 48.131106 | 3.614838 | 40.077983 |
| O  | 29.397715 | 4.875707 | 33.622058 | C | 48.293940 | 4.591590 | 39.261905 |
| O  | 33.114133 | 6.869525 | 43.478202 | C | 44.193973 | 5.710313 | 41.383325 |
| O  | 32.753832 | 4.707350 | 43.969558 | C | 43.571611 | 6.727820 | 42.128186 |
| C  | 32.828552 | 5.932541 | 44.276428 | C | 44.009960 | 3.953124 | 39.655836 |
| Cu | 48.413818 | 6.330096 | 41.563304 | O | 46.436703 | 6.506031 | 41.438634 |
| Cu | 48.009807 | 3.897063 | 42.043577 | O | 46.074532 | 4.314677 | 41.835837 |
| C  | 52.242278 | 4.464620 | 41.931334 | C | 45.654437 | 5.496681 | 41.562078 |
| C  | 52.828353 | 3.947597 | 43.079285 | C | 47.841311 | 5.981193 | 45.774837 |
| C  | 54.201353 | 3.732577 | 43.123183 | C | 48.788426 | 6.807087 | 46.408285 |
| C  | 54.987278 | 4.036581 | 42.018131 | C | 49.984722 | 7.129377 | 32.189207 |
| C  | 54.401203 | 4.554604 | 40.869180 | C | 48.930969 | 6.613236 | 32.935776 |
| C  | 53.028203 | 4.768624 | 40.826281 | C | 47.966214 | 5.771697 | 32.349108 |
| C  | 52.442128 | 5.287648 | 39.677330 | C | 46.721911 | 5.507962 | 46.514678 |
| C  | 53.229054 | 5.591652 | 38.571278 | C | 45.688479 | 4.766089 | 45.904555 |
| C  | 54.601054 | 5.377632 | 38.616177 | C | 44.614075 | 4.302389 | 46.657437 |
| C  | 55.187129 | 4.858609 | 39.764128 | C | 45.919037 | 4.459052 | 32.491037 |

|    |           |          |           |   |           |          |           |
|----|-----------|----------|-----------|---|-----------|----------|-----------|
| C  | 46.885734 | 5.262062 | 33.111436 | C | 14.931578 | 4.757753 | 51.039674 |
| O  | 44.854892 | 3.965760 | 33.237353 | C | 14.899945 | 5.034023 | 52.433241 |
| O  | 48.303216 | 6.613588 | 43.526439 | C | 14.099714 | 6.095957 | 52.899523 |
| O  | 47.904472 | 4.434785 | 43.955878 | C | 13.393282 | 6.888670 | 52.003896 |
| C  | 48.031934 | 5.655305 | 44.334855 | C | 13.447708 | 6.656131 | 50.639549 |
| C  | 9.830848  | 7.260896 | 57.522290 | C | 14.219257 | 5.586010 | 50.132028 |
| C  | 8.959816  | 6.502907 | 56.749315 | O | 12.739629 | 7.535723 | 49.823307 |
| C  | 9.429783  | 5.394908 | 56.054291 | O | 15.941650 | 5.653466 | 55.204662 |
| C  | 10.771783 | 5.042898 | 56.134241 | O | 15.435937 | 3.487672 | 55.582702 |
| C  | 10.370718 | 3.178911 | 54.666243 | C | 15.676110 | 4.467340 | 54.790241 |
| C  | 9.028718  | 3.528920 | 54.587293 | C | 11.644816 | 5.800887 | 56.909216 |
| C  | 8.558750  | 4.637919 | 55.281317 | C | 11.172849 | 6.908886 | 57.603240 |
| O  | 8.125684  | 2.792932 | 53.781319 | C | 25.326798 | 7.125686 | 57.546934 |
| Cu | 15.893784 | 6.138006 | 57.133117 | C | 24.489943 | 6.292293 | 56.814204 |
| Cu | 15.344289 | 3.724228 | 57.553376 | C | 24.999947 | 5.189199 | 56.099008 |
| C  | 19.601744 | 4.048102 | 57.428959 | C | 26.397303 | 4.930867 | 56.136770 |
| C  | 20.155710 | 3.276830 | 58.466509 | C | 11.243751 | 3.934900 | 55.440217 |
| C  | 21.509769 | 2.965973 | 58.479792 | C | 26.066138 | 3.073241 | 54.608708 |
| C  | 22.334714 | 3.412983 | 57.453022 | C | 24.697598 | 3.286176 | 54.598815 |
| C  | 21.818929 | 4.163968 | 56.379548 | C | 24.138960 | 4.348123 | 55.345375 |
| C  | 20.432172 | 4.471897 | 56.353421 | O | 23.928289 | 2.400327 | 53.847289 |
| C  | 19.907766 | 5.159815 | 55.238497 | O | 13.938937 | 6.431005 | 56.974115 |
| C  | 20.743493 | 5.565725 | 54.202704 | O | 13.436010 | 4.269632 | 57.372521 |
| C  | 22.110528 | 5.304092 | 54.246780 | C | 13.091918 | 5.474231 | 57.086496 |
| C  | 22.660208 | 4.595355 | 55.323686 | C | 15.283046 | 5.695821 | 61.352095 |
| O  | 22.933666 | 5.716264 | 53.204749 | C | 16.314087 | 6.385804 | 61.978046 |
| O  | 17.797199 | 5.598254 | 57.294689 | C | 17.600160 | 6.766947 | 47.729801 |
| O  | 17.310463 | 3.426855 | 57.668464 | C | 16.488529 | 6.395445 | 48.476941 |
| C  | 18.150916 | 4.377989 | 57.476066 | C | 15.418174 | 5.692768 | 47.890512 |
| C  | 15.641877 | 4.212455 | 53.325542 | C | 14.198081 | 5.242825 | 62.095148 |
| C  | 16.352053 | 3.107924 | 52.821685 | C | 13.166040 | 4.552842 | 61.469196 |
| C  | 16.368901 | 2.830998 | 51.462079 | C | 12.083075 | 4.099846 | 62.213249 |
| C  | 15.673278 | 3.649388 | 50.580095 | C | 13.215137 | 4.664734 | 48.036626 |

|    |           |          |           |    |           |          |           |
|----|-----------|----------|-----------|----|-----------|----------|-----------|
| C  | 14.283415 | 5.327539 | 48.656388 | O  | 31.107774 | 3.569981 | 55.542855 |
| O  | 12.098011 | 4.312685 | 48.785806 | C  | 31.339300 | 4.567078 | 54.768106 |
| O  | 15.761019 | 6.378471 | 59.107941 | C  | 27.240767 | 5.758306 | 56.929354 |
| O  | 15.282229 | 4.206237 | 59.478393 | C  | 26.688135 | 6.862045 | 57.604264 |
| C  | 15.448074 | 5.410185 | 59.892228 | C  | 40.920248 | 6.960255 | 57.612719 |
| Cu | 31.487819 | 6.203012 | 57.141025 | C  | 40.093739 | 6.143753 | 56.852709 |
| Cu | 30.980973 | 3.772873 | 57.521057 | C  | 40.609806 | 5.046711 | 56.131532 |
| C  | 35.222770 | 4.142037 | 57.460753 | C  | 42.005694 | 4.780179 | 56.187370 |
| C  | 35.764545 | 3.419923 | 58.539533 | C  | 26.916129 | 3.878769 | 55.356082 |
| C  | 37.109434 | 3.074878 | 58.563830 | C  | 41.685284 | 2.935607 | 54.642695 |
| C  | 37.935742 | 3.433109 | 57.504769 | C  | 40.318658 | 3.161722 | 54.607437 |
| C  | 37.432391 | 4.137292 | 56.393792 | C  | 39.754979 | 4.222351 | 55.352669 |
| C  | 36.055962 | 4.487939 | 56.361689 | O  | 39.555537 | 2.284233 | 53.840171 |
| C  | 35.543553 | 5.139892 | 55.220757 | O  | 29.519101 | 6.465310 | 57.004286 |
| C  | 36.381627 | 5.461612 | 54.157462 | O  | 29.069666 | 4.280045 | 57.332946 |
| C  | 37.739795 | 5.154665 | 54.202704 | C  | 28.695618 | 5.484460 | 57.094254 |
| C  | 38.277901 | 4.485807 | 55.311146 | C  | 30.903120 | 5.695641 | 61.351269 |
| O  | 38.565859 | 5.487055 | 53.135104 | C  | 31.934175 | 6.385618 | 61.977205 |
| O  | 33.405587 | 5.682511 | 57.287755 | C  | 33.183987 | 7.613997 | 47.641321 |
| O  | 32.942527 | 3.504797 | 57.658021 | C  | 32.199928 | 7.010153 | 48.394811 |
| C  | 33.771790 | 4.465905 | 57.478402 | C  | 31.306431 | 6.043195 | 47.830381 |
| C  | 31.397162 | 4.328509 | 53.299808 | C  | 29.818167 | 5.242646 | 62.094340 |
| C  | 32.219674 | 3.291182 | 52.825037 | C  | 28.786113 | 4.552669 | 61.468405 |
| C  | 32.365181 | 3.061823 | 51.463657 | C  | 27.703159 | 4.099675 | 62.212476 |
| C  | 31.680643 | 3.854730 | 50.549537 | C  | 29.375442 | 4.546961 | 47.957406 |
| C  | 30.816953 | 4.882592 | 50.977484 | C  | 30.248461 | 5.433213 | 48.587534 |
| C  | 30.669568 | 5.122883 | 52.371263 | O  | 28.376984 | 3.954294 | 48.667101 |
| C  | 29.775539 | 6.123586 | 52.799055 | O  | 31.364333 | 6.408930 | 59.117302 |
| C  | 29.073816 | 6.880466 | 51.867600 | O  | 30.894563 | 4.229283 | 59.454872 |
| C  | 29.222890 | 6.668495 | 50.506899 | C  | 31.058872 | 5.427777 | 59.887165 |
| C  | 30.096041 | 5.665053 | 50.042113 | Cu | 47.053252 | 6.247208 | 57.149476 |
| O  | 28.491504 | 7.490859 | 49.654980 | Cu | 46.688901 | 3.791481 | 57.536874 |
| O  | 31.542751 | 5.757270 | 55.203401 | C  | 50.914829 | 4.464394 | 57.493750 |

|   |           |          |           |   |           |          |           |
|---|-----------|----------|-----------|---|-----------|----------|-----------|
| C | 51.500923 | 3.947364 | 58.641689 | C | 46.523195 | 5.695406 | 61.350162 |
| C | 52.873923 | 3.732339 | 58.685563 | C | 47.554262 | 6.385378 | 61.976082 |
| C | 53.659830 | 4.036343 | 57.580498 | C | 48.671348 | 7.126643 | 47.754407 |
| C | 53.073736 | 4.554373 | 56.431559 | C | 47.603270 | 6.631524 | 48.493190 |
| C | 51.700736 | 4.768398 | 56.388685 | C | 46.618159 | 5.820924 | 47.896510 |
| C | 51.114643 | 5.287428 | 55.239746 | C | 45.438253 | 5.242413 | 62.093251 |
| C | 51.901549 | 5.591433 | 54.133681 | C | 44.406185 | 4.552442 | 61.467332 |
| C | 53.273549 | 5.377407 | 54.178555 | C | 43.323243 | 4.099449 | 62.211421 |
| C | 53.859642 | 4.858378 | 55.326493 | C | 44.538455 | 4.560018 | 48.023913 |
| O | 53.987445 | 5.617415 | 52.967495 | C | 45.525419 | 5.330636 | 48.653631 |
| O | 48.992439 | 5.857445 | 57.301387 | O | 43.463554 | 4.082966 | 48.765291 |
| O | 48.674247 | 3.653668 | 57.672990 | O | 46.921239 | 6.442649 | 59.123016 |
| C | 49.438752 | 4.671053 | 57.499041 | O | 46.574293 | 4.238581 | 59.463634 |
| C | 46.979125 | 4.347111 | 53.321858 | C | 46.675541 | 5.443561 | 59.891199 |
| C | 47.812605 | 3.333334 | 52.816389 | C | 16.262162 | 6.620790 | 63.347051 |
| C | 47.866693 | 3.067821 | 51.455712 | C | 15.179196 | 6.168795 | 64.090104 |
| C | 47.086138 | 3.807046 | 50.574817 | C | 14.147156 | 5.478812 | 63.465153 |
| C | 46.222943 | 4.823018 | 51.036633 | C | 12.031150 | 4.336833 | 63.582254 |
| C | 46.156009 | 5.087223 | 52.431013 | C | 13.063191 | 5.025817 | 64.207206 |
| C | 45.244318 | 6.053657 | 52.899741 | O | 10.943187 | 3.908837 | 64.361307 |
| C | 44.457216 | 6.767547 | 52.005395 | C | 31.882275 | 6.620600 | 63.346211 |
| C | 44.537742 | 6.545952 | 50.640437 | C | 30.799322 | 6.168606 | 64.089282 |
| C | 45.425734 | 5.571197 | 50.130386 | C | 29.767267 | 5.478629 | 63.464346 |
| O | 43.738290 | 7.345044 | 49.825955 | C | 27.651260 | 4.336658 | 63.581482 |
| O | 47.127229 | 5.793153 | 55.214286 | C | 28.683314 | 5.025635 | 64.206417 |
| O | 46.817689 | 3.586190 | 55.567382 | O | 26.563309 | 3.908663 | 64.360554 |
| C | 46.974144 | 4.591655 | 54.787204 | C | 47.502389 | 6.620356 | 63.345091 |
| C | 42.841729 | 5.603942 | 56.990439 | C | 46.419447 | 6.168363 | 64.088179 |
| C | 42.279461 | 6.695065 | 57.679417 | C | 45.387379 | 5.478391 | 63.463260 |
| C | 42.529519 | 3.729185 | 55.409859 | C | 43.271369 | 4.336426 | 63.580429 |
| O | 45.080885 | 6.396791 | 57.019707 | C | 44.303437 | 5.025398 | 64.205349 |
| O | 44.743667 | 4.191678 | 57.352096 | O | 42.183431 | 3.908432 | 64.359519 |
| C | 44.308009 | 5.378598 | 57.121560 | H | 12.119205 | 8.126988 | 26.935857 |

|   |           |          |           |   |           |          |           |
|---|-----------|----------|-----------|---|-----------|----------|-----------|
| H | 10.573014 | 6.786801 | 25.566394 | H | 31.124947 | 7.499541 | 21.165332 |
| H | 13.383961 | 2.323446 | 22.982372 | H | 29.992303 | 7.518340 | 27.131902 |
| H | 9.847471  | 3.169800 | 22.676992 | H | 43.108940 | 7.703158 | 27.043921 |
| H | 22.115907 | 2.811262 | 28.210858 | H | 41.666207 | 6.198635 | 25.788280 |
| H | 24.516878 | 2.282000 | 28.271556 | H | 30.625457 | 3.573716 | 24.371174 |
| H | 26.008586 | 3.092164 | 26.516356 | H | 44.785192 | 1.859160 | 23.217615 |
| H | 21.502672 | 5.272274 | 24.067504 | H | 35.854573 | 6.562982 | 30.214625 |
| H | 23.002617 | 6.019462 | 22.328602 | H | 31.418210 | 4.719833 | 29.560085 |
| H | 19.531966 | 2.329427 | 22.589919 | H | 29.521658 | 4.362765 | 31.027304 |
| H | 19.679350 | 1.794090 | 20.190510 | H | 31.292299 | 6.861162 | 17.596329 |
| H | 18.480529 | 3.170848 | 18.536718 | H | 40.804865 | 5.755081 | 21.418952 |
| H | 16.651757 | 6.145567 | 22.827104 | H | 41.263098 | 2.201159 | 22.965135 |
| H | 15.507011 | 7.501000 | 21.165373 | H | 53.552007 | 3.699075 | 28.380999 |
| H | 14.495478 | 7.507771 | 27.088040 | H | 55.987677 | 3.325906 | 28.455657 |
| H | 27.582640 | 7.987286 | 27.006352 | H | 57.384066 | 3.866287 | 26.497830 |
| H | 26.094872 | 6.500636 | 25.773113 | H | 52.703481 | 5.453594 | 24.015689 |
| H | 14.941550 | 3.634234 | 24.311121 | H | 54.081091 | 5.976324 | 22.116963 |
| H | 29.117024 | 2.137933 | 23.131890 | H | 50.777400 | 2.334516 | 22.589144 |
| H | 19.773943 | 6.912684 | 30.323860 | H | 50.920814 | 1.795206 | 20.189767 |
| H | 15.697537 | 4.476148 | 29.299692 | H | 49.720330 | 3.170939 | 18.535923 |
| H | 13.824242 | 3.720207 | 30.623374 | H | 47.863783 | 6.134901 | 22.823868 |
| H | 15.672059 | 6.861142 | 17.596378 | H | 46.741365 | 7.496848 | 21.165091 |
| H | 25.133343 | 6.196299 | 21.521615 | H | 45.525811 | 7.295362 | 27.170680 |
| H | 25.596104 | 2.518567 | 22.939610 | H | 46.258380 | 3.322662 | 24.472612 |
| H | 37.704349 | 2.874525 | 28.298929 | H | 50.938821 | 7.204431 | 30.278021 |
| H | 40.083450 | 2.262741 | 28.385056 | H | 47.070741 | 4.429212 | 29.312580 |
| H | 41.591285 | 2.900955 | 26.574268 | H | 45.244091 | 3.583620 | 30.646869 |
| H | 37.156257 | 5.120154 | 24.031005 | H | 46.913185 | 6.861825 | 17.595775 |
| H | 38.670796 | 5.691501 | 22.234649 | H | 56.055930 | 5.976964 | 21.104253 |
| H | 35.148209 | 2.327828 | 22.590832 | H | 10.790574 | 8.126887 | 42.500083 |
| H | 35.298361 | 1.793414 | 20.190369 | H | 9.244362  | 6.786854 | 41.130264 |
| H | 34.099912 | 3.170583 | 18.536495 | H | 12.055946 | 2.325981 | 38.542911 |
| H | 32.265133 | 6.144043 | 22.825998 | H | 8.519335  | 3.171137 | 38.239804 |



|   |           |          |           |   |           |          |           |
|---|-----------|----------|-----------|---|-----------|----------|-----------|
| H | 20.601793 | 2.644305 | 43.899591 | H | 31.586228 | 8.588638 | 36.908387 |
| H | 22.973277 | 2.021932 | 44.083675 | H | 28.368309 | 7.400702 | 43.058505 |
| H | 24.563007 | 2.669773 | 42.343880 | H | 41.739115 | 7.740419 | 42.609098 |
| H | 20.233951 | 4.858854 | 39.601283 | H | 40.377468 | 6.382075 | 41.116193 |
| H | 21.824612 | 5.421367 | 37.867012 | H | 29.375896 | 3.462059 | 40.449210 |
| H | 18.009692 | 2.130417 | 37.978922 | H | 43.685465 | 2.454996 | 38.154855 |
| H | 18.053023 | 1.670856 | 35.563948 | H | 34.138470 | 7.746994 | 45.683622 |
| H | 16.938252 | 3.172123 | 33.998844 | H | 35.970643 | 7.091229 | 32.611598 |
| H | 15.253818 | 6.098494 | 38.432481 | H | 34.080112 | 6.616841 | 34.077013 |
| H | 14.126499 | 7.546570 | 36.846533 | H | 30.632069 | 4.559908 | 44.785143 |
| H | 13.168791 | 7.505353 | 42.651841 | H | 28.804688 | 3.591973 | 46.085771 |
| H | 25.876962 | 7.509003 | 43.109837 | H | 28.618256 | 4.470358 | 33.125119 |
| H | 24.528826 | 5.930854 | 41.824367 | H | 31.228992 | 8.099431 | 33.511805 |
| H | 13.612691 | 3.636767 | 39.860312 | H | 39.534475 | 6.525385 | 36.944325 |
| H | 28.037794 | 1.908370 | 39.075555 | H | 40.156812 | 2.749946 | 37.831876 |
| H | 18.550139 | 6.721740 | 45.817353 | H | 52.223551 | 3.706439 | 43.946547 |
| H | 19.609438 | 7.422301 | 32.723548 | H | 54.659220 | 3.327336 | 44.019582 |
| H | 17.719285 | 6.606600 | 34.035681 | H | 56.055380 | 3.866422 | 42.061123 |
| H | 14.338073 | 4.502967 | 44.850402 | H | 51.374846 | 5.453435 | 39.578994 |
| H | 12.418447 | 3.903703 | 46.189840 | H | 52.752217 | 5.975806 | 37.680124 |
| H | 12.824613 | 3.520610 | 32.669224 | H | 49.705592 | 2.686931 | 38.001668 |
| H | 14.184784 | 7.182729 | 33.318450 | H | 49.802148 | 2.190062 | 35.597097 |
| H | 23.998355 | 5.524758 | 37.163633 | H | 48.476566 | 3.482618 | 34.013254 |
| H | 24.624069 | 2.026456 | 38.610744 | H | 46.436849 | 6.253098 | 38.398399 |
| H | 36.483168 | 2.514079 | 43.185370 | H | 45.108129 | 7.493157 | 36.792053 |
| H | 38.881108 | 1.768051 | 43.077017 | H | 44.156433 | 7.344337 | 42.801298 |
| H | 40.405316 | 2.723548 | 41.415129 | H | 45.078144 | 3.763004 | 39.658123 |
| H | 35.966730 | 5.519117 | 39.461054 | H | 49.628748 | 7.198589 | 45.846365 |
| H | 37.441370 | 6.359933 | 37.692797 | H | 50.711795 | 7.785840 | 32.657063 |
| H | 32.464820 | 2.023826 | 38.435169 | H | 48.866130 | 6.888786 | 33.979775 |
| H | 32.401501 | 1.461955 | 35.991025 | H | 45.685948 | 4.544833 | 44.842744 |
| H | 32.085532 | 3.217953 | 34.329960 | H | 43.835759 | 3.732837 | 46.167840 |
| H | 32.040632 | 6.858510 | 38.590501 | H | 44.245148 | 3.373798 | 32.693354 |

|   |           |          |           |   |           |          |           |
|---|-----------|----------|-----------|---|-----------|----------|-----------|
| H | 45.200089 | 7.067974 | 33.271952 | H | 34.494841 | 5.402884 | 55.129927 |
| H | 54.726267 | 5.972412 | 36.666013 | H | 35.966272 | 5.962942 | 53.293667 |
| H | 9.463364  | 8.127032 | 58.062952 | H | 32.765261 | 2.667219 | 53.523921 |
| H | 7.916948  | 6.786729 | 56.693489 | H | 33.014535 | 2.265403 | 51.113272 |
| H | 10.728378 | 2.325485 | 54.106719 | H | 31.821112 | 3.645135 | 49.497424 |
| H | 7.191738  | 3.170762 | 53.803455 | H | 29.595489 | 6.328227 | 53.849362 |
| H | 19.526294 | 2.925147 | 59.275929 | H | 28.389860 | 7.648691 | 52.204110 |
| H | 21.923998 | 2.376501 | 59.291817 | H | 27.324106 | 7.512218 | 58.194203 |
| H | 23.384169 | 3.154004 | 57.495496 | H | 40.503841 | 7.805673 | 58.151424 |
| H | 18.850449 | 5.382236 | 55.142586 | H | 39.042125 | 6.389470 | 56.820440 |
| H | 20.317864 | 6.092751 | 53.359512 | H | 27.978218 | 3.670829 | 55.295072 |
| H | 16.900288 | 2.460439 | 53.496427 | H | 42.095143 | 2.126302 | 54.053345 |
| H | 16.923941 | 1.976273 | 51.088167 | H | 32.786868 | 6.742113 | 61.409353 |
| H | 15.706676 | 3.397111 | 49.529821 | H | 33.835650 | 8.364644 | 48.099025 |
| H | 13.996788 | 6.325104 | 53.953984 | H | 32.093517 | 7.295759 | 49.446023 |
| H | 12.787844 | 7.707072 | 52.369837 | H | 28.750448 | 4.373617 | 60.400116 |
| H | 11.840495 | 7.509098 | 58.212507 | H | 26.897913 | 3.574282 | 61.718423 |
| H | 24.915432 | 7.977114 | 58.079968 | H | 27.880314 | 3.348664 | 48.093037 |
| H | 23.435518 | 6.528606 | 56.796471 | H | 28.644407 | 7.290771 | 48.678864 |
| H | 12.285103 | 3.636245 | 55.427459 | H | 38.076340 | 5.993787 | 52.412680 |
| H | 26.472560 | 2.263843 | 54.017086 | H | 38.576261 | 2.512644 | 53.839142 |
| H | 17.168420 | 6.739348 | 61.410757 | H | 50.895005 | 3.699945 | 59.506371 |
| H | 18.410847 | 7.316946 | 48.197662 | H | 53.331570 | 3.325521 | 59.581294 |
| H | 16.465265 | 6.673776 | 49.521811 | H | 54.727853 | 3.865742 | 57.623117 |
| H | 13.129709 | 4.375523 | 60.400584 | H | 50.047660 | 5.459524 | 55.145398 |
| H | 11.277919 | 3.574374 | 61.719226 | H | 51.424840 | 5.977028 | 53.243047 |
| H | 11.416374 | 3.805119 | 48.241905 | H | 48.426849 | 2.747893 | 53.491083 |
| H | 12.815554 | 7.313201 | 48.845541 | H | 48.515630 | 2.282679 | 51.080596 |
| H | 22.432631 | 6.241707 | 52.504102 | H | 47.150285 | 3.564741 | 49.523737 |
| H | 22.946073 | 2.615494 | 53.868864 | H | 45.115427 | 6.265791 | 53.955153 |
| H | 35.130249 | 3.125063 | 59.367629 | H | 43.763195 | 7.511472 | 52.373250 |
| H | 37.513921 | 2.522291 | 59.406091 | H | 42.909693 | 7.344110 | 58.276747 |
| H | 38.976598 | 3.143148 | 57.553653 | H | 43.590485 | 3.511360 | 55.368614 |

|   |           |           |           |             |           |           |           |
|---|-----------|-----------|-----------|-------------|-----------|-----------|-----------|
| H | 48.405699 | 6.744563  | 61.407905 | C           | 33.643098 | 11.016967 | 40.536480 |
| H | 49.413502 | 7.760642  | 48.229547 | C           | 32.284543 | 10.437054 | 40.127226 |
| H | 47.543683 | 6.899892  | 49.539298 | O           | 32.723163 | 8.151801  | 40.679708 |
| H | 44.381327 | 4.364309  | 60.399408 | C           | 29.822089 | 9.846274  | 43.768176 |
| H | 42.519349 | 3.571688  | 61.717655 | C           | 28.503176 | 10.351936 | 43.697878 |
| H | 42.840093 | 3.511447  | 48.214860 | C           | 27.504740 | 9.875308  | 44.547821 |
| H | 43.821351 | 7.119712  | 48.849569 | C           | 27.777846 | 8.872051  | 45.487261 |
| H | 53.398480 | 5.970742  | 52.227811 | C           | 29.081265 | 8.368742  | 45.568077 |
| H | 17.068262 | 7.157999  | 63.836018 | C           | 30.093598 | 8.847790  | 44.734603 |
| H | 15.148095 | 6.357251  | 65.155563 | N           | 30.806491 | 10.338192 | 42.924594 |
| H | 10.263264 | 3.421880  | 63.796859 | H           | 33.283062 | 10.441692 | 43.965672 |
| H | 32.687882 | 7.158644  | 63.835004 | H           | 31.883197 | 8.583405  | 43.019719 |
| H | 30.767901 | 6.357388  | 65.154653 | H           | 30.837607 | 8.950576  | 40.763439 |
| H | 25.881770 | 3.424643  | 63.795430 | H           | 34.627642 | 11.812507 | 42.319165 |
| H | 48.307521 | 7.159120  | 63.833761 | H           | 32.898828 | 12.192786 | 42.205652 |
| H | 46.387751 | 6.357306  | 65.153494 | H           | 33.888814 | 11.894385 | 39.910094 |
| H | 41.501425 | 3.425105  | 63.794253 | H           | 34.424329 | 10.257189 | 40.349071 |
| H | 54.922558 | 4.682783  | 55.325804 | H           | 31.499501 | 11.215202 | 40.226875 |
| H | 56.250092 | 4.683140  | 39.763727 | H           | 32.285465 | 10.123825 | 39.067756 |
| H | 57.578893 | 4.683406  | 24.200677 | H           | 34.088426 | 9.406941  | 42.766784 |
| H | 32.654296 | 5.043307  | 18.026535 | H           | 28.265609 | 11.121494 | 42.954557 |
| H | 17.034876 | 5.043568  | 18.026682 | H           | 26.493137 | 10.286964 | 44.463441 |
| H | 10.176553 | 4.915350  | 24.089676 | H           | 26.988886 | 8.491312  | 46.142250 |
| H | 8.847986  | 4.915601  | 39.653361 | H           | 29.331871 | 7.582348  | 46.286687 |
| H | 7.520590  | 4.915659  | 55.216399 | H           | 31.103010 | 8.450277  | 44.849244 |
| H | 12.998983 | 5.199026  | 65.269027 | H           | 31.313866 | 6.459376  | 40.754934 |
| H | 28.618792 | 5.199034  | 65.268152 | H           | 30.492757 | 11.044407 | 42.267047 |
| H | 44.238656 | 5.198873  | 65.267032 |             |           |           |           |
| H | 48.273988 | 5.043114  | 18.026066 | (R,R)-2-TS3 |           |           |           |
| C | 31.891378 | 9.217877  | 40.988577 | C           | 12.487000 | 7.261000  | 26.395000 |
| C | 31.956023 | 9.547884  | 42.511205 | C           | 11.616000 | 6.503000  | 25.622000 |
| C | 33.305287 | 10.178036 | 42.893581 | C           | 12.086000 | 5.395000  | 24.927000 |
| C | 33.647291 | 11.394718 | 42.025720 | C           | 13.428000 | 5.043000  | 25.007000 |

|    |           |          |           |    |           |          |           |
|----|-----------|----------|-----------|----|-----------|----------|-----------|
| C  | 13.027000 | 3.179000 | 23.539000 | C  | 18.266838 | 4.337436 | 23.747107 |
| C  | 11.685000 | 3.529000 | 23.460000 | C  | 14.301000 | 5.801000 | 25.782000 |
| C  | 11.215000 | 4.638000 | 24.154000 | C  | 13.829000 | 6.909000 | 26.476000 |
| O  | 10.782000 | 2.793000 | 22.654000 | C  | 28.026948 | 7.145762 | 26.533147 |
| Cu | 18.543745 | 6.084628 | 26.025203 | C  | 27.180609 | 6.295099 | 25.830245 |
| Cu | 17.955154 | 3.694834 | 26.529620 | C  | 27.679885 | 5.166472 | 25.149126 |
| C  | 22.226423 | 3.962421 | 26.387934 | C  | 29.074044 | 4.893815 | 25.199790 |
| C  | 22.759067 | 3.167184 | 27.419209 | C  | 13.900000 | 3.935000 | 24.313000 |
| C  | 24.114818 | 2.865077 | 27.460077 | C  | 28.724496 | 2.985350 | 23.738363 |
| C  | 24.963950 | 3.344431 | 26.468350 | C  | 27.360070 | 3.218514 | 23.711011 |
| C  | 24.471319 | 4.116310 | 25.399536 | C  | 26.812214 | 4.312639 | 24.417658 |
| C  | 23.083082 | 4.414799 | 25.343066 | O  | 26.583595 | 2.322781 | 22.978987 |
| C  | 22.584778 | 5.122671 | 24.228122 | O  | 16.596689 | 6.401801 | 25.859048 |
| C  | 23.446196 | 5.563145 | 23.228238 | O  | 16.057099 | 4.260822 | 26.320553 |
| C  | 24.813124 | 5.310017 | 23.303514 | C  | 15.736473 | 5.459892 | 25.988374 |
| C  | 25.337343 | 4.576323 | 24.376333 | C  | 17.921302 | 5.795579 | 30.246473 |
| O  | 25.660918 | 5.752711 | 22.294037 | C  | 18.913201 | 6.557058 | 30.891507 |
| O  | 20.436502 | 5.523343 | 26.199554 | C  | 16.779324 | 5.369772 | 30.982870 |
| O  | 19.921840 | 3.373913 | 26.649572 | C  | 15.704860 | 4.696775 | 30.363093 |
| C  | 20.775898 | 4.306267 | 26.421165 | C  | 14.605134 | 4.284601 | 31.109846 |
| C  | 18.226927 | 4.022014 | 22.293999 | O  | 18.430608 | 6.394897 | 27.990603 |
| C  | 18.992915 | 2.941012 | 21.873981 | O  | 17.902604 | 4.247107 | 28.434779 |
| C  | 19.081890 | 2.638017 | 20.519979 | C  | 18.100407 | 5.459457 | 28.806085 |
| C  | 18.404876 | 3.417023 | 19.587993 | Cu | 34.196480 | 6.078976 | 26.036156 |
| C  | 17.639888 | 4.497024 | 20.008011 | Cu | 33.622835 | 3.692529 | 26.568353 |
| C  | 17.550913 | 4.800019 | 21.362013 | C  | 37.879145 | 3.921306 | 26.343956 |
| C  | 16.783924 | 5.881020 | 21.784030 | C  | 38.410104 | 3.189947 | 27.422751 |
| C  | 16.107910 | 6.659026 | 20.850045 | C  | 39.754285 | 2.842498 | 27.457563 |
| C  | 16.197885 | 6.355031 | 19.497042 | C  | 40.593076 | 3.211965 | 26.412618 |
| C  | 16.963875 | 5.274030 | 19.076025 | C  | 40.101349 | 3.921958 | 25.300831 |
| O  | 15.523872 | 7.185037 | 18.539057 | C  | 38.723582 | 4.266205 | 25.252073 |
| O  | 18.565471 | 5.530824 | 24.116544 | C  | 38.222545 | 4.913178 | 24.103276 |
| O  | 18.026509 | 3.388288 | 24.574537 | C  | 39.073491 | 5.241540 | 23.051978 |

|   |           |          |           |    |           |          |           |
|---|-----------|----------|-----------|----|-----------|----------|-----------|
| C | 40.433955 | 4.948756 | 23.118172 | C  | 31.378888 | 5.449226 | 26.132342 |
| C | 40.960825 | 4.283707 | 24.234091 | C  | 33.879229 | 5.799555 | 30.286144 |
| O | 41.273324 | 5.292967 | 22.064416 | C  | 35.033473 | 6.358673 | 30.864230 |
| O | 36.099288 | 5.500449 | 26.125423 | C  | 32.722801 | 5.601601 | 31.088846 |
| O | 35.582304 | 3.364663 | 26.636466 | C  | 31.520722 | 5.110801 | 30.541178 |
| C | 36.435603 | 4.285819 | 26.373665 | C  | 30.394669 | 4.955576 | 31.345963 |
| C | 33.846854 | 4.021972 | 22.293718 | O  | 34.191609 | 6.388090 | 28.001376 |
| C | 34.612831 | 2.940969 | 21.873683 | O  | 33.635586 | 4.254218 | 28.481732 |
| C | 34.701781 | 2.637978 | 20.519678 | C  | 33.904798 | 5.458705 | 28.837724 |
| C | 34.024753 | 3.416989 | 19.587708 | Cu | 49.694961 | 6.208051 | 25.983486 |
| C | 33.259776 | 4.496991 | 20.007741 | Cu | 49.343813 | 3.790887 | 26.565516 |
| C | 33.170826 | 4.799983 | 21.361747 | C  | 53.571003 | 4.464792 | 26.367939 |
| C | 32.403848 | 5.880986 | 21.783781 | C  | 54.157058 | 3.947774 | 27.515902 |
| C | 31.727821 | 6.658997 | 20.849810 | C  | 55.530059 | 3.732759 | 27.559826 |
| C | 31.817771 | 6.355005 | 19.496805 | C  | 56.316002 | 4.036762 | 26.454787 |
| C | 32.583748 | 5.274002 | 19.075771 | C  | 55.729946 | 4.554780 | 25.305823 |
| O | 31.143743 | 7.185016 | 18.538835 | C  | 54.356947 | 4.768795 | 25.262899 |
| O | 34.146693 | 5.534177 | 24.124971 | C  | 53.770890 | 5.287813 | 24.113936 |
| O | 33.647075 | 3.386634 | 24.594708 | C  | 54.557834 | 5.591815 | 23.007897 |
| C | 33.871502 | 4.335427 | 23.757424 | C  | 55.929834 | 5.377800 | 23.052821 |
| C | 29.927424 | 5.740576 | 25.962458 | C  | 56.515889 | 4.858782 | 24.200784 |
| C | 29.387397 | 6.873722 | 26.597258 | O  | 56.643771 | 5.617805 | 21.841785 |
| C | 43.530883 | 6.874652 | 26.489569 | O  | 51.637566 | 5.839302 | 26.123955 |
| C | 42.726876 | 6.018173 | 25.748400 | O  | 51.334307 | 3.663575 | 26.640401 |
| C | 43.269488 | 4.904908 | 25.073591 | C  | 52.092902 | 4.668399 | 26.382631 |
| C | 44.667060 | 4.658940 | 25.163916 | C  | 49.466779 | 4.021876 | 22.293156 |
| C | 29.581495 | 3.805382 | 24.461356 | C  | 50.232745 | 2.940872 | 21.873104 |
| C | 44.396782 | 2.750174 | 23.688063 | C  | 50.321669 | 2.637885 | 20.519096 |
| C | 43.029819 | 2.963981 | 23.611864 | C  | 49.644627 | 3.416901 | 19.587140 |
| C | 42.440245 | 4.044153 | 24.306486 | C  | 48.879661 | 4.496905 | 20.007192 |
| O | 42.292515 | 2.057328 | 22.853725 | C  | 48.790737 | 4.799893 | 21.361200 |
| O | 32.226982 | 6.400781 | 25.972316 | C  | 48.023772 | 5.880897 | 21.783251 |
| O | 31.725216 | 4.251074 | 26.432050 | C  | 47.347731 | 6.658913 | 20.849295 |

|    |           |          |           |   |           |          |           |
|----|-----------|----------|-----------|---|-----------|----------|-----------|
| C  | 47.437655 | 6.354926 | 19.496287 | C | 23.539640 | 2.881590 | 42.202355 |
| C  | 48.203620 | 5.273922 | 19.075235 | C | 23.137291 | 3.655614 | 41.099122 |
| O  | 46.763613 | 7.184943 | 18.538331 | C | 21.766442 | 4.006332 | 40.960960 |
| O  | 49.731827 | 5.592331 | 24.089762 | C | 21.354373 | 4.699818 | 39.804779 |
| O  | 49.388174 | 3.426874 | 24.609531 | C | 22.284615 | 5.069726 | 38.837947 |
| C  | 49.526603 | 4.369432 | 23.750063 | C | 23.637256 | 4.786072 | 39.004605 |
| C  | 45.480562 | 5.528008 | 25.942645 | C | 24.077374 | 4.086148 | 40.134172 |
| C  | 44.894251 | 6.635973 | 26.581984 | O | 24.554151 | 5.176370 | 38.037200 |
| C  | 45.216554 | 3.579624 | 24.444325 | O | 19.128530 | 5.272502 | 41.695008 |
| O  | 47.715241 | 6.340048 | 25.881976 | O | 18.509323 | 3.152874 | 42.154793 |
| O  | 47.394062 | 4.171938 | 26.414236 | C | 19.408472 | 4.042571 | 41.939585 |
| C  | 46.949235 | 5.331476 | 26.085776 | C | 16.819145 | 3.949858 | 37.784119 |
| C  | 49.186785 | 5.999087 | 30.218599 | C | 17.460800 | 2.808271 | 37.271143 |
| C  | 50.123912 | 6.849756 | 30.833115 | C | 17.471200 | 2.550404 | 35.906657 |
| C  | 48.075512 | 5.524605 | 30.971057 | C | 16.837466 | 3.424317 | 35.030091 |
| C  | 47.052779 | 4.754305 | 30.377764 | C | 16.151872 | 4.562823 | 35.500959 |
| C  | 45.981030 | 4.298224 | 31.139076 | C | 16.125259 | 4.820221 | 36.898075 |
| O  | 49.603283 | 6.569851 | 27.939115 | C | 15.381864 | 5.919033 | 37.374313 |
| O  | 49.291502 | 4.396169 | 28.457135 | C | 14.721391 | 6.758624 | 36.486021 |
| C  | 49.379621 | 5.633393 | 28.788025 | C | 14.770570 | 6.540348 | 35.119296 |
| C  | 11.158286 | 7.260970 | 41.959133 | C | 15.494215 | 5.442783 | 34.601354 |
| C  | 10.287269 | 6.502976 | 41.186145 | O | 14.103159 | 7.457929 | 34.311095 |
| C  | 10.757253 | 5.394976 | 40.491133 | O | 17.240389 | 5.397025 | 39.627972 |
| C  | 12.099253 | 5.042971 | 40.571108 | O | 16.624286 | 3.271952 | 40.065856 |
| C  | 11.698221 | 3.178978 | 39.103109 | C | 16.901252 | 4.220004 | 39.245484 |
| C  | 10.356221 | 3.528983 | 39.024134 | C | 12.972270 | 5.800966 | 41.346096 |
| C  | 9.886237  | 4.637982 | 39.718146 | C | 12.500286 | 6.908965 | 42.040108 |
| O  | 9.453204  | 2.792989 | 38.218147 | C | 26.256355 | 6.494513 | 43.000095 |
| Cu | 17.253807 | 5.931767 | 41.539125 | C | 25.579180 | 5.690791 | 42.106818 |
| Cu | 16.566515 | 3.568420 | 42.036519 | C | 26.243431 | 4.726694 | 41.280744 |
| C  | 20.841009 | 3.625980 | 41.973308 | C | 27.678271 | 4.614970 | 41.412665 |
| C  | 21.286309 | 2.831790 | 43.046733 | C | 12.571237 | 3.934972 | 39.877096 |
| C  | 22.621315 | 2.463021 | 43.158656 | C | 27.666520 | 2.901525 | 39.685516 |

|    |           |          |           |   |           |          |           |
|----|-----------|----------|-----------|---|-----------|----------|-----------|
| C  | 26.255720 | 2.995921 | 39.554773 | O | 35.155960 | 5.405242 | 41.895967 |
| C  | 25.537152 | 3.901355 | 40.330862 | O | 34.347139 | 3.307847 | 41.916711 |
| O  | 25.742741 | 2.136488 | 38.629731 | C | 35.285830 | 4.151485 | 41.812788 |
| O  | 15.305397 | 6.339832 | 41.402521 | C | 32.461700 | 4.190176 | 37.950604 |
| O  | 14.695189 | 4.218409 | 41.858939 | C | 32.621298 | 2.890582 | 37.499993 |
| C  | 14.409507 | 5.430632 | 41.544770 | C | 32.515414 | 2.608991 | 36.122518 |
| C  | 16.663876 | 5.669070 | 45.759444 | C | 32.223571 | 3.615818 | 35.225777 |
| C  | 17.697885 | 6.391747 | 46.383330 | C | 31.996473 | 4.966877 | 35.645886 |
| C  | 18.819190 | 6.851028 | 32.245973 | C | 32.121670 | 5.253055 | 37.052038 |
| C  | 17.730059 | 6.396273 | 32.981045 | C | 31.859216 | 6.579112 | 37.509024 |
| C  | 16.697664 | 5.658269 | 32.371549 | C | 31.503006 | 7.563211 | 36.622190 |
| C  | 15.503186 | 5.324490 | 46.508224 | C | 31.402371 | 7.299673 | 35.228971 |
| C  | 14.395787 | 4.686590 | 45.910240 | C | 31.650853 | 6.024034 | 34.731607 |
| C  | 13.278110 | 4.354281 | 46.669851 | O | 31.061114 | 8.399793 | 34.492502 |
| C  | 14.543817 | 4.525849 | 32.480055 | O | 33.403649 | 5.433743 | 39.730524 |
| C  | 15.578589 | 5.219543 | 33.121797 | O | 32.153896 | 3.632742 | 40.219140 |
| O  | 13.438728 | 4.108101 | 33.213329 | C | 32.688107 | 4.452442 | 39.402213 |
| O  | 17.176871 | 6.236566 | 43.502607 | C | 28.357061 | 5.488072 | 42.335198 |
| O  | 16.550386 | 4.115798 | 43.948037 | C | 27.653731 | 6.409059 | 43.105094 |
| C  | 16.809942 | 5.317367 | 44.319361 | C | 42.198388 | 6.939114 | 42.113898 |
| Cu | 33.543014 | 6.427878 | 41.519696 | C | 41.419768 | 6.158786 | 41.267193 |
| Cu | 32.492640 | 3.946990 | 42.099887 | C | 41.996899 | 5.159893 | 40.457568 |
| C  | 36.673833 | 3.647046 | 41.587373 | C | 43.398983 | 4.939200 | 40.530454 |
| C  | 37.172790 | 2.660473 | 42.415937 | C | 28.359510 | 3.685290 | 40.572403 |
| C  | 38.534853 | 2.292767 | 42.326467 | C | 43.185886 | 3.227801 | 38.821536 |
| C  | 39.369979 | 2.911511 | 41.420460 | C | 41.815238 | 3.419382 | 38.757504 |
| C  | 38.888044 | 3.907193 | 40.508419 | C | 41.201564 | 4.385134 | 39.578474 |
| C  | 37.493398 | 4.252413 | 40.578052 | O | 41.101114 | 2.607988 | 37.880385 |
| C  | 36.967230 | 5.163695 | 39.617468 | O | 30.301291 | 6.658154 | 42.900097 |
| C  | 37.781185 | 5.731648 | 38.667095 | O | 30.553819 | 4.535914 | 42.216365 |
| C  | 39.176114 | 5.460123 | 38.641349 | C | 29.829536 | 5.509369 | 42.467782 |
| C  | 39.733010 | 4.559659 | 39.547219 | C | 32.616778 | 5.989047 | 45.745105 |
| O  | 39.970409 | 6.081272 | 37.725589 | C | 33.485559 | 6.891484 | 46.331146 |

|    |           |          |           |   |           |          |           |
|----|-----------|----------|-----------|---|-----------|----------|-----------|
| C  | 35.072933 | 6.675458 | 32.216170 | C | 47.477160 | 5.121920 | 36.897824 |
| C  | 33.954229 | 6.458247 | 33.012529 | C | 46.606222 | 6.131638 | 37.354233 |
| C  | 32.765551 | 5.935643 | 32.469869 | C | 45.859482 | 6.876910 | 36.450150 |
| C  | 31.498157 | 5.460931 | 46.473780 | C | 45.939375 | 6.644259 | 35.087130 |
| C  | 30.523549 | 4.611422 | 45.876690 | C | 46.787688 | 5.629866 | 34.588606 |
| C  | 29.435191 | 4.167934 | 46.588306 | O | 45.175571 | 7.467337 | 34.262587 |
| C  | 30.438648 | 5.267107 | 32.703769 | O | 48.454566 | 5.827249 | 39.659799 |
| C  | 31.618752 | 5.753904 | 33.275434 | O | 48.119921 | 3.635220 | 40.071554 |
| O  | 29.306768 | 5.106810 | 33.492759 | C | 48.278921 | 4.619334 | 39.262908 |
| O  | 33.089446 | 6.573919 | 43.508534 | C | 44.184728 | 5.719036 | 41.423509 |
| O  | 32.733000 | 4.410376 | 43.982157 | C | 43.568289 | 6.726456 | 42.187384 |
| C  | 32.844817 | 5.623460 | 44.316204 | C | 43.980463 | 3.970296 | 39.689092 |
| Cu | 48.411324 | 6.335883 | 41.580153 | O | 46.431333 | 6.514312 | 41.465222 |
| Cu | 48.006528 | 3.899828 | 42.041708 | O | 46.070373 | 4.319934 | 41.844819 |
| C  | 52.242278 | 4.464620 | 41.931334 | C | 45.648421 | 5.504484 | 41.585168 |
| C  | 52.828353 | 3.947597 | 43.079285 | C | 47.851063 | 5.958187 | 45.789994 |
| C  | 54.201353 | 3.732577 | 43.123183 | C | 48.811542 | 6.763797 | 46.429715 |
| C  | 54.987278 | 4.036581 | 42.018131 | C | 50.006244 | 7.189639 | 32.175110 |
| C  | 54.401203 | 4.554604 | 40.869180 | C | 48.947331 | 6.692402 | 32.926982 |
| C  | 53.028203 | 4.768624 | 40.826281 | C | 47.970031 | 5.861390 | 32.347108 |
| C  | 52.442128 | 5.287648 | 39.677330 | C | 46.716720 | 5.508959 | 46.522477 |
| C  | 53.229054 | 5.591652 | 38.571278 | C | 45.677560 | 4.778986 | 45.907932 |
| C  | 54.601054 | 5.377632 | 38.616177 | C | 44.582533 | 4.349038 | 46.651475 |
| C  | 55.187129 | 4.858609 | 39.764128 | C | 45.899920 | 4.586854 | 32.498977 |
| O  | 55.314970 | 5.617639 | 37.405129 | C | 46.883066 | 5.373840 | 33.114369 |
| O  | 50.346982 | 5.902366 | 41.722175 | O | 44.825683 | 4.120439 | 33.248260 |
| O  | 49.985782 | 3.720651 | 42.173043 | O | 48.308400 | 6.603180 | 43.545492 |
| C  | 50.770712 | 4.711690 | 41.952046 | O | 47.906688 | 4.422037 | 43.960161 |
| C  | 48.259825 | 4.348090 | 37.799499 | C | 48.037926 | 5.639670 | 44.347794 |
| C  | 49.046013 | 3.292587 | 37.303019 | C | 9.830848  | 7.260896 | 57.522290 |
| C  | 49.100539 | 3.023490 | 35.942460 | C | 8.959816  | 6.502907 | 56.749315 |
| C  | 48.366571 | 3.798559 | 35.052251 | C | 9.429783  | 5.394908 | 56.054291 |
| C  | 47.544183 | 4.851247 | 35.504162 | C | 10.771783 | 5.042898 | 56.134241 |



|    |           |          |           |    |           |          |           |
|----|-----------|----------|-----------|----|-----------|----------|-----------|
| C  | 10.370718 | 3.178911 | 54.666243 | C  | 15.671986 | 4.444651 | 54.791855 |
| C  | 9.028718  | 3.528920 | 54.587293 | C  | 11.644816 | 5.800887 | 56.909216 |
| C  | 8.558750  | 4.637919 | 55.281317 | C  | 11.172849 | 6.908886 | 57.603240 |
| O  | 8.125684  | 2.792932 | 53.781319 | C  | 25.305808 | 7.080196 | 57.511011 |
| Cu | 15.897896 | 6.120821 | 57.131618 | C  | 24.473453 | 6.237417 | 56.784377 |
| Cu | 15.336931 | 3.711069 | 57.558430 | C  | 24.986657 | 5.121937 | 56.091473 |
| C  | 19.596053 | 4.011068 | 57.433823 | C  | 26.382516 | 4.858330 | 56.148824 |
| C  | 20.148698 | 3.246022 | 58.477005 | C  | 11.243751 | 3.934900 | 55.440217 |
| C  | 21.501318 | 2.928426 | 58.488988 | C  | 26.057438 | 2.973778 | 54.651592 |
| C  | 22.325305 | 3.359982 | 57.455016 | C  | 24.690876 | 3.196467 | 54.619054 |
| C  | 21.810422 | 4.103286 | 56.375947 | C  | 24.129730 | 4.273186 | 55.341805 |
| C  | 20.425939 | 4.420789 | 56.352318 | O  | 23.925683 | 2.304279 | 53.871185 |
| C  | 19.902729 | 5.105607 | 55.234947 | O  | 13.942982 | 6.423541 | 56.972252 |
| C  | 20.737057 | 5.494726 | 54.191588 | O  | 13.431126 | 4.265426 | 57.376645 |
| C  | 22.102032 | 5.221604 | 54.231619 | C  | 13.091584 | 5.470735 | 57.087776 |
| C  | 22.650951 | 4.519579 | 55.313577 | C  | 15.283046 | 5.695821 | 61.352095 |
| O  | 22.923607 | 5.618083 | 53.182259 | C  | 16.314087 | 6.385804 | 61.978046 |
| O  | 17.799158 | 5.570627 | 57.294952 | C  | 17.620819 | 6.733487 | 47.727042 |
| O  | 17.301333 | 3.402809 | 57.674399 | C  | 16.506742 | 6.366970 | 48.472752 |
| C  | 18.146843 | 4.348981 | 57.480294 | C  | 15.437433 | 5.663102 | 47.886671 |
| C  | 15.635734 | 4.186980 | 53.326604 | C  | 14.198081 | 5.242825 | 62.095148 |
| C  | 16.331252 | 3.071318 | 52.825960 | C  | 13.166040 | 4.552842 | 61.469196 |
| C  | 16.347120 | 2.792238 | 51.466684 | C  | 12.083075 | 4.099846 | 62.213249 |
| C  | 15.663671 | 3.617424 | 50.581785 | C  | 13.231259 | 4.641660 | 48.031731 |
| C  | 14.935356 | 4.735838 | 51.037450 | C  | 14.298994 | 5.305730 | 48.651155 |
| C  | 14.907335 | 5.017497 | 52.430305 | O  | 12.108925 | 4.300121 | 48.778124 |
| C  | 14.124641 | 6.094727 | 52.891743 | O  | 15.767132 | 6.369002 | 59.105877 |
| C  | 13.428672 | 6.893125 | 51.992552 | O  | 15.278838 | 4.200034 | 59.482510 |
| C  | 13.476222 | 6.651253 | 50.629567 | C  | 15.449810 | 5.404643 | 59.893142 |
| C  | 14.233507 | 5.569125 | 50.126274 | Cu | 31.471283 | 6.151134 | 57.128789 |
| O  | 12.776332 | 7.534106 | 49.810157 | Cu | 30.968047 | 3.726701 | 57.544005 |
| O  | 15.943900 | 5.630140 | 55.204111 | C  | 35.213133 | 4.096769 | 57.450120 |
| O  | 15.427075 | 3.468235 | 55.587291 | C  | 35.756124 | 3.370492 | 58.526006 |

|   |           |          |           |    |           |          |           |
|---|-----------|----------|-----------|----|-----------|----------|-----------|
| C | 37.101379 | 3.025898 | 58.548157 | C  | 41.679479 | 2.888664 | 54.667172 |
| C | 37.927736 | 3.389053 | 57.490981 | C  | 40.314075 | 3.119407 | 54.619003 |
| C | 37.424444 | 4.098089 | 56.383583 | C  | 39.748653 | 4.190745 | 55.347030 |
| C | 36.047474 | 4.448351 | 56.352825 | O  | 39.553673 | 2.236007 | 53.856174 |
| C | 35.535620 | 5.104967 | 55.214439 | O  | 29.500645 | 6.410340 | 56.999849 |
| C | 36.373794 | 5.429271 | 54.151794 | O  | 29.054299 | 4.230742 | 57.366361 |
| C | 37.732044 | 5.122147 | 54.195792 | C  | 28.678025 | 5.430217 | 57.106834 |
| C | 38.270581 | 4.450871 | 55.302691 | C  | 30.903120 | 5.695641 | 61.351269 |
| O | 38.557446 | 5.456828 | 53.128357 | C  | 31.934175 | 6.385618 | 61.977205 |
| O | 33.391231 | 5.633829 | 57.269226 | C  | 33.317831 | 7.258489 | 47.683387 |
| O | 32.932133 | 3.460186 | 57.664984 | C  | 32.273567 | 6.745523 | 48.422030 |
| C | 33.760390 | 4.419647 | 57.470142 | C  | 31.316539 | 5.844507 | 47.850973 |
| C | 31.317174 | 4.225324 | 53.308070 | C  | 29.818167 | 5.242646 | 62.094340 |
| C | 32.069849 | 3.132759 | 52.839124 | C  | 28.786113 | 4.552669 | 61.468405 |
| C | 32.176407 | 2.868610 | 51.480713 | C  | 27.703159 | 4.099675 | 62.212476 |
| C | 31.524855 | 3.683071 | 50.562683 | C  | 29.268595 | 4.508530 | 47.957057 |
| C | 30.734157 | 4.770723 | 50.983452 | C  | 30.198314 | 5.330623 | 48.591538 |
| C | 30.620455 | 5.043747 | 52.374332 | O  | 28.200667 | 4.027260 | 48.650299 |
| C | 29.789413 | 6.101882 | 52.792827 | O  | 31.360699 | 6.384435 | 59.105364 |
| C | 29.126617 | 6.886733 | 51.854582 | O  | 30.900210 | 4.207725 | 59.472521 |
| C | 29.251662 | 6.646306 | 50.496364 | C  | 31.061877 | 5.412149 | 59.889410 |
| C | 30.054526 | 5.582132 | 50.042344 | Cu | 47.046876 | 6.244771 | 57.146035 |
| O | 28.573770 | 7.504456 | 49.634878 | Cu | 46.685888 | 3.789404 | 57.533326 |
| O | 31.510837 | 5.678489 | 55.195010 | C  | 50.914829 | 4.464394 | 57.493750 |
| O | 31.070768 | 3.498349 | 55.567364 | C  | 51.500923 | 3.947364 | 58.641689 |
| C | 31.292033 | 4.484778 | 54.775933 | C  | 52.873923 | 3.732339 | 58.685563 |
| C | 27.222289 | 5.698734 | 56.933131 | C  | 53.659830 | 4.036343 | 57.580498 |
| C | 26.666341 | 6.815642 | 57.583803 | C  | 53.073736 | 4.554373 | 56.431559 |
| C | 40.906433 | 6.953486 | 57.579390 | C  | 51.700736 | 4.768398 | 56.388685 |
| C | 40.082855 | 6.128407 | 56.825685 | C  | 51.114643 | 5.287428 | 55.239746 |
| C | 40.601415 | 5.023249 | 56.119726 | C  | 51.901549 | 5.591433 | 54.133681 |
| C | 41.997267 | 4.756158 | 56.185628 | C  | 53.273549 | 5.377407 | 54.178555 |
| C | 26.903589 | 3.787248 | 55.395413 | C  | 53.859642 | 4.858378 | 55.326493 |

|   |           |          |           |   |           |          |           |
|---|-----------|----------|-----------|---|-----------|----------|-----------|
| O | 53.987445 | 5.617415 | 52.967495 | C | 45.494098 | 5.372795 | 48.650430 |
| O | 48.988758 | 5.856156 | 57.297108 | O | 43.396636 | 4.183833 | 48.744765 |
| O | 48.672692 | 3.652270 | 57.668144 | O | 46.917259 | 6.441458 | 59.120646 |
| C | 49.437046 | 4.670276 | 57.496493 | O | 46.573581 | 4.237225 | 59.462108 |
| C | 46.948042 | 4.351163 | 53.311961 | C | 46.674407 | 5.442568 | 59.890041 |
| C | 47.754511 | 3.318855 | 52.798914 | C | 16.262162 | 6.620790 | 63.347051 |
| C | 47.791581 | 3.052822 | 51.437660 | C | 15.179196 | 6.168795 | 64.090104 |
| C | 47.020324 | 3.808276 | 50.562995 | C | 14.147156 | 5.478812 | 63.465153 |
| C | 46.184083 | 4.843434 | 51.030717 | C | 12.031150 | 4.336833 | 63.582254 |
| C | 46.134902 | 5.110430 | 52.425791 | C | 13.063191 | 5.025817 | 64.207206 |
| C | 45.250489 | 6.099922 | 52.899251 | O | 10.943187 | 3.908837 | 64.361307 |
| C | 44.473138 | 6.830818 | 52.009314 | C | 31.882275 | 6.620600 | 63.346211 |
| C | 44.536298 | 6.604093 | 50.644245 | C | 30.799322 | 6.168606 | 64.089282 |
| C | 45.397754 | 5.608818 | 50.128823 | C | 29.767267 | 5.478629 | 63.464346 |
| O | 43.748424 | 7.419503 | 49.835034 | C | 27.651260 | 4.336658 | 63.581482 |
| O | 47.117584 | 5.792499 | 55.209342 | C | 28.683314 | 5.025635 | 64.206417 |
| O | 46.809183 | 3.585788 | 55.560877 | O | 26.563309 | 3.908663 | 64.360554 |
| C | 46.958748 | 4.592479 | 54.780019 | C | 47.502389 | 6.620356 | 63.345091 |
| C | 42.831914 | 5.591567 | 56.980083 | C | 46.419447 | 6.168363 | 64.088179 |
| C | 42.265892 | 6.690511 | 57.654119 | C | 45.387379 | 5.478391 | 63.463260 |
| C | 42.522028 | 3.691581 | 55.427095 | C | 43.271369 | 4.336426 | 63.580429 |
| O | 45.071845 | 6.390901 | 57.016861 | C | 44.303437 | 5.025398 | 64.205349 |
| O | 44.739126 | 4.185892 | 57.350780 | O | 42.183431 | 3.908432 | 64.359519 |
| C | 44.300179 | 5.371003 | 57.117171 | H | 12.119148 | 8.126810 | 26.936120 |
| C | 46.523195 | 5.695406 | 61.350162 | H | 10.573014 | 6.786735 | 25.566630 |
| C | 47.554262 | 6.385378 | 61.976082 | H | 13.382386 | 2.322459 | 22.982829 |
| C | 48.688708 | 7.091127 | 47.773434 | H | 9.847434  | 3.169537 | 22.676425 |
| C | 47.601258 | 6.626197 | 48.503116 | H | 22.112669 | 2.794756 | 28.206186 |
| C | 46.604856 | 5.833881 | 47.901067 | H | 24.512619 | 2.260096 | 28.268547 |
| C | 45.438253 | 5.242413 | 62.093251 | H | 26.014507 | 3.094851 | 26.534698 |
| C | 44.406185 | 4.552442 | 61.467332 | H | 21.528494 | 5.332980 | 24.100960 |
| C | 43.323243 | 4.099449 | 62.211421 | H | 23.039831 | 6.107683 | 22.386783 |
| C | 44.494387 | 4.623994 | 48.014044 | H | 19.532688 | 2.330022 | 22.589848 |

|   |           |          |           |   |           |          |           |
|---|-----------|----------|-----------|---|-----------|----------|-----------|
| H | 19.679862 | 1.794462 | 20.190459 | H | 31.289170 | 6.859474 | 17.596510 |
| H | 18.480883 | 3.171000 | 18.536739 | H | 40.790283 | 5.802907 | 21.339817 |
| H | 16.654327 | 6.146537 | 22.827181 | H | 41.311314 | 2.276284 | 22.825106 |
| H | 15.507586 | 7.501999 | 21.163878 | H | 53.552185 | 3.700598 | 28.381532 |
| H | 14.495376 | 7.507694 | 27.088221 | H | 55.987764 | 3.326392 | 28.455845 |
| H | 27.623029 | 8.018080 | 27.036642 | H | 57.384054 | 3.866433 | 26.497976 |
| H | 26.127484 | 6.537312 | 25.807224 | H | 52.703572 | 5.453970 | 24.015745 |
| H | 14.941235 | 3.633099 | 24.313726 | H | 54.081390 | 5.976929 | 22.117007 |
| H | 29.121591 | 2.148191 | 23.179833 | H | 50.777472 | 2.335022 | 22.589426 |
| H | 19.774588 | 6.909420 | 30.334938 | H | 50.920784 | 1.795168 | 20.189799 |
| H | 15.688550 | 4.492904 | 29.297734 | H | 49.720299 | 3.170770 | 18.535993 |
| H | 13.795482 | 3.768545 | 30.612046 | H | 47.864487 | 6.135485 | 22.823793 |
| H | 15.672671 | 6.862191 | 17.596195 | H | 46.741365 | 7.497413 | 21.163709 |
| H | 25.174866 | 6.290762 | 21.592224 | H | 45.507942 | 7.318149 | 27.159853 |
| H | 25.604408 | 2.552462 | 22.985858 | H | 46.279163 | 3.364643 | 24.443962 |
| H | 37.770052 | 2.897221 | 28.247785 | H | 50.958929 | 7.239961 | 30.261924 |
| H | 40.150357 | 2.285358 | 28.300562 | H | 47.056327 | 4.504734 | 29.322111 |
| H | 41.634369 | 2.925395 | 26.472890 | H | 45.210319 | 3.708350 | 30.661812 |
| H | 37.172333 | 5.163482 | 23.994539 | H | 46.907005 | 6.857885 | 17.596269 |
| H | 38.666053 | 5.738526 | 22.182129 | H | 56.056812 | 5.973990 | 21.102092 |
| H | 35.150024 | 2.329229 | 22.590660 | H | 10.790573 | 8.126876 | 42.500115 |
| H | 35.298906 | 1.793801 | 20.190345 | H | 9.244397  | 6.786902 | 41.130389 |
| H | 34.100153 | 3.170629 | 18.536537 | H | 12.054461 | 2.325295 | 38.542955 |
| H | 32.266462 | 6.144150 | 22.826192 | H | 8.520484  | 3.174008 | 38.235158 |
| H | 31.125227 | 7.500300 | 21.163927 | H | 20.586915 | 2.511043 | 43.811131 |
| H | 30.031340 | 7.539574 | 27.160797 | H | 22.949460 | 1.857157 | 43.997401 |
| H | 43.093417 | 7.731549 | 26.991680 | H | 24.573217 | 2.582379 | 42.323570 |
| H | 41.671742 | 6.244629 | 25.693948 | H | 20.313603 | 4.949387 | 39.622706 |
| H | 30.640272 | 3.577838 | 24.415624 | H | 21.944030 | 5.596452 | 37.956464 |
| H | 44.825122 | 1.919425 | 23.143311 | H | 17.969364 | 2.123521 | 37.940457 |
| H | 35.913928 | 6.535862 | 30.256458 | H | 17.978216 | 1.670758 | 35.523557 |
| H | 31.433810 | 4.851015 | 29.489928 | H | 16.870109 | 3.191490 | 33.975123 |
| H | 29.480851 | 4.582583 | 30.903252 | H | 15.285783 | 6.139667 | 38.431386 |

|   |           |          |           |   |           |          |           |
|---|-----------|----------|-----------|---|-----------|----------|-----------|
| H | 14.155709 | 7.601935 | 36.859275 | H | 30.639446 | 4.299316 | 44.840280 |
| H | 13.169196 | 7.504876 | 42.651706 | H | 28.690840 | 3.527912 | 46.099669 |
| H | 25.706982 | 7.214910 | 43.613331 | H | 28.532273 | 4.710177 | 32.981133 |
| H | 24.495015 | 5.820363 | 42.040430 | H | 30.948219 | 8.196461 | 33.550775 |
| H | 13.612388 | 3.636253 | 39.860700 | H | 39.440743 | 6.699713 | 37.196741 |
| H | 28.189878 | 2.194104 | 39.036935 | H | 40.113913 | 2.815201 | 37.862054 |
| H | 18.574995 | 6.683674 | 45.816416 | H | 52.223565 | 3.706557 | 43.946538 |
| H | 19.597845 | 7.430159 | 32.731888 | H | 54.659244 | 3.327408 | 44.019610 |
| H | 17.691827 | 6.639685 | 34.034354 | H | 56.055342 | 3.866410 | 42.061235 |
| H | 14.368535 | 4.447009 | 44.852694 | H | 51.374936 | 5.456069 | 39.580968 |
| H | 12.443505 | 3.862370 | 46.189099 | H | 52.752597 | 5.977092 | 37.680422 |
| H | 12.777716 | 3.592267 | 32.651764 | H | 49.630126 | 2.682863 | 37.983403 |
| H | 14.148626 | 7.226855 | 33.333251 | H | 49.717187 | 2.210332 | 35.573573 |
| H | 24.132107 | 5.725123 | 37.301756 | H | 48.433867 | 3.555859 | 34.001356 |
| H | 24.785676 | 2.238248 | 38.511163 | H | 46.476677 | 6.353947 | 38.407253 |
| H | 36.517035 | 2.198772 | 43.159196 | H | 45.196485 | 7.653286 | 36.808239 |
| H | 38.933300 | 1.523611 | 42.995672 | H | 44.160587 | 7.341512 | 42.855782 |
| H | 40.424337 | 2.618844 | 41.393514 | H | 45.048539 | 3.779335 | 39.680014 |
| H | 35.902588 | 5.403836 | 39.613636 | H | 49.665043 | 7.135792 | 45.873805 |
| H | 37.354543 | 6.417538 | 37.925235 | H | 50.741712 | 7.839740 | 32.637864 |
| H | 32.852312 | 2.099435 | 38.217737 | H | 48.887584 | 6.975437 | 33.969358 |
| H | 32.669451 | 1.586808 | 35.762584 | H | 45.686905 | 4.540355 | 44.849829 |
| H | 32.154927 | 3.355111 | 34.164754 | H | 43.799161 | 3.789692 | 46.158278 |
| H | 31.931686 | 6.818024 | 38.572670 | H | 44.200952 | 3.541023 | 32.707483 |
| H | 31.292982 | 8.580347 | 36.963538 | H | 45.248414 | 7.225068 | 33.289290 |
| H | 28.194789 | 7.069056 | 43.785160 | H | 54.726624 | 5.966808 | 36.663025 |
| H | 41.734775 | 7.712703 | 42.717775 | H | 9.463430  | 8.127146 | 58.062832 |
| H | 40.356362 | 6.356361 | 41.238202 | H | 7.917028  | 6.786919 | 56.693476 |
| H | 29.443685 | 3.596821 | 40.616960 | H | 10.726918 | 2.324704 | 54.106920 |
| H | 43.638737 | 2.485022 | 38.177777 | H | 7.193561  | 3.175391 | 53.796565 |
| H | 34.301657 | 7.312311 | 45.738759 | H | 19.519776 | 2.905246 | 59.291912 |
| H | 35.975935 | 7.091801 | 32.651271 | H | 21.915643 | 2.345634 | 59.305282 |
| H | 34.021901 | 6.713766 | 34.062547 | H | 23.373357 | 3.095361 | 57.496749 |

|   |           |          |           |   |           |          |           |
|---|-----------|----------|-----------|---|-----------|----------|-----------|
| H | 18.847362 | 5.339128 | 55.143088 | H | 39.031308 | 6.373372 | 56.786219 |
| H | 20.312178 | 6.019277 | 53.346564 | H | 27.964527 | 3.569263 | 55.353486 |
| H | 16.869715 | 2.417440 | 53.502930 | H | 42.089367 | 2.068501 | 54.092927 |
| H | 16.891664 | 1.930301 | 51.094878 | H | 32.787645 | 6.739954 | 61.409294 |
| H | 15.695838 | 3.362756 | 49.532116 | H | 34.016516 | 7.963509 | 48.143334 |
| H | 14.027098 | 6.331786 | 53.945021 | H | 32.167982 | 7.056639 | 49.465933 |
| H | 12.836224 | 7.722995 | 52.354142 | H | 28.750397 | 4.373292 | 60.400134 |
| H | 11.840698 | 7.508839 | 58.212464 | H | 26.898021 | 3.573739 | 61.718725 |
| H | 24.891129 | 7.940673 | 58.025977 | H | 27.668963 | 3.449399 | 48.079090 |
| H | 23.419896 | 6.476120 | 56.753681 | H | 28.698385 | 7.273425 | 48.660920 |
| H | 12.284878 | 3.635448 | 55.428946 | H | 38.068398 | 5.966847 | 52.407695 |
| H | 26.464785 | 2.149694 | 54.081142 | H | 38.578021 | 2.478136 | 53.831569 |
| H | 17.168871 | 6.738413 | 61.410907 | H | 50.894859 | 3.699634 | 59.506114 |
| H | 18.429783 | 7.285091 | 48.195205 | H | 53.331526 | 3.325361 | 59.581251 |
| H | 16.480301 | 6.650686 | 49.516152 | H | 54.727797 | 3.865607 | 57.623223 |
| H | 13.129502 | 4.375128 | 60.400691 | H | 50.047792 | 5.460857 | 55.146018 |
| H | 11.278001 | 3.573873 | 61.719528 | H | 51.425188 | 5.977967 | 53.243217 |
| H | 11.425342 | 3.794407 | 48.234630 | H | 48.361298 | 2.719102 | 53.468201 |
| H | 12.839278 | 7.298966 | 48.834481 | H | 48.419886 | 2.254363 | 51.056550 |
| H | 22.423952 | 6.142317 | 52.479444 | H | 47.070539 | 3.563759 | 49.511705 |
| H | 22.946687 | 2.534525 | 53.865697 | H | 45.135423 | 6.318110 | 53.954915 |
| H | 35.122568 | 3.072275 | 59.353933 | H | 43.800769 | 7.593009 | 52.380214 |
| H | 37.506612 | 2.469657 | 59.387168 | H | 42.893347 | 7.347267 | 58.246495 |
| H | 38.968539 | 3.098472 | 57.537998 | H | 43.582318 | 3.469295 | 55.395381 |
| H | 34.487008 | 5.368622 | 55.124054 | H | 48.405526 | 6.744636 | 61.407777 |
| H | 35.958367 | 5.932646 | 53.289353 | H | 49.439708 | 7.710099 | 48.253534 |
| H | 32.590180 | 2.489813 | 53.540584 | H | 47.535761 | 6.903879 | 49.546396 |
| H | 32.769928 | 2.028127 | 51.135132 | H | 44.382319 | 4.362982 | 60.399598 |
| H | 31.633062 | 3.443195 | 49.513250 | H | 42.519568 | 3.570976 | 61.717959 |
| H | 29.629228 | 6.332517 | 53.840615 | H | 42.760416 | 3.631048 | 48.189458 |
| H | 28.495486 | 7.702184 | 52.183157 | H | 43.807092 | 7.180239 | 48.860236 |
| H | 27.299034 | 7.476246 | 58.166180 | H | 53.398691 | 5.964446 | 52.224631 |
| H | 40.487098 | 7.804222 | 58.106645 | H | 17.068467 | 7.157627 | 63.836112 |

|   |           |           |           |                     |           |           |           |
|---|-----------|-----------|-----------|---------------------|-----------|-----------|-----------|
| H | 15.148261 | 6.357127  | 65.155563 | N                   | 32.623980 | 10.707553 | 42.892537 |
| H | 10.261794 | 3.422546  | 63.798060 | H                   | 35.046498 | 10.324248 | 41.864554 |
| H | 32.688187 | 7.158113  | 63.835107 | H                   | 33.387424 | 8.796402  | 42.940795 |
| H | 30.768112 | 6.357258  | 65.154654 | H                   | 31.002439 | 8.877650  | 42.050086 |
| H | 25.879138 | 3.427455  | 63.796198 | H                   | 34.797693 | 10.738113 | 39.379195 |
| H | 48.307476 | 7.159243  | 63.833715 | H                   | 33.583587 | 11.638469 | 40.295080 |
| H | 46.387827 | 6.357481  | 65.153435 | H                   | 32.497801 | 10.513984 | 38.345153 |
| H | 41.497996 | 3.429485  | 63.794642 | H                   | 33.133205 | 8.941650  | 38.870671 |
| H | 54.922501 | 4.682764  | 55.325505 | H                   | 31.144117 | 10.676378 | 40.461097 |
| H | 56.250043 | 4.683192  | 39.763403 | H                   | 30.745899 | 9.184487  | 39.579092 |
| H | 57.578861 | 4.683541  | 24.200338 | H                   | 34.696118 | 8.842466  | 40.951858 |
| H | 32.654191 | 5.043642  | 18.026515 | H                   | 31.312466 | 12.774337 | 43.917031 |
| H | 17.034722 | 5.043892  | 18.026656 | H                   | 29.911547 | 12.762744 | 45.954201 |
| H | 10.176539 | 4.915037  | 24.089471 | H                   | 29.580329 | 10.647972 | 47.262872 |
| H | 8.847951  | 4.915251  | 39.653274 | H                   | 30.690170 | 8.540965  | 46.458790 |
| H | 7.520537  | 4.915276  | 55.216414 | H                   | 32.054821 | 8.537322  | 44.434014 |
| H | 12.998675 | 5.198814  | 65.268994 | H                   | 31.272204 | 6.747687  | 42.736572 |
| H | 28.618505 | 5.198903  | 65.268105 | H                   | 32.536076 | 11.549316 | 42.333664 |
| H | 44.238351 | 5.198855  | 65.266963 |                     |           |           |           |
| H | 48.273823 | 5.043387  | 18.026057 |                     |           |           |           |
| C | 31.886569 | 8.858477  | 41.380104 | ( <i>R,R</i> )-2-PC |           |           |           |
| C | 33.059683 | 9.517926  | 42.180381 | C                   | 12.487000 | 7.261000  | 26.395000 |
| C | 34.266924 | 9.812256  | 41.272571 | C                   | 11.616000 | 6.503000  | 25.622000 |
| C | 33.901929 | 10.613068 | 40.014822 | C                   | 12.086000 | 5.395000  | 24.927000 |
| C | 32.775104 | 9.920674  | 39.236218 | C                   | 13.428000 | 5.043000  | 25.007000 |
| C | 31.551051 | 9.699182  | 40.132034 | C                   | 13.027000 | 3.179000  | 23.539000 |
| O | 32.155237 | 7.548263  | 40.982897 | C                   | 11.685000 | 3.529000  | 23.460000 |
| C | 31.805657 | 10.661831 | 44.014857 | C                   | 11.215000 | 4.638000  | 24.154000 |
| C | 31.173366 | 11.840573 | 44.474566 | O                   | 10.782000 | 2.793000  | 22.654000 |
| C | 30.384948 | 11.831032 | 45.625102 | Cu                  | 18.545211 | 6.099706  | 26.004396 |
| C | 30.195417 | 10.651423 | 46.357851 | Cu                  | 17.957621 | 3.712909  | 26.529586 |
| C | 30.811954 | 9.479505  | 45.906767 | C                   | 22.221207 | 3.972023  | 26.370636 |
| C | 31.600828 | 9.474083  | 44.754241 | C                   | 22.764886 | 3.214615  | 27.423776 |
|   |           |           |           | C                   | 24.118096 | 2.901312  | 27.452650 |

|   |           |          |           |    |           |          |           |
|---|-----------|----------|-----------|----|-----------|----------|-----------|
| C | 24.952702 | 3.333636 | 26.427392 | C  | 27.336646 | 3.163299 | 23.592046 |
| C | 24.446952 | 4.068344 | 25.337960 | C  | 26.775183 | 4.235322 | 24.322233 |
| C | 23.060449 | 4.373771 | 25.293200 | O  | 26.571630 | 2.272218 | 22.842322 |
| C | 22.545304 | 5.036966 | 24.158835 | O  | 16.595625 | 6.409533 | 25.840243 |
| C | 23.390644 | 5.428201 | 23.125328 | O  | 16.060871 | 4.270955 | 26.319640 |
| C | 24.758122 | 5.174392 | 23.189753 | C  | 15.737715 | 5.466436 | 25.980565 |
| C | 25.297986 | 4.485402 | 24.284302 | C  | 17.917761 | 5.856229 | 30.218759 |
| O | 25.590849 | 5.570430 | 22.148912 | C  | 18.909843 | 6.621169 | 30.858682 |
| O | 20.438399 | 5.538538 | 26.177222 | C  | 16.766136 | 5.452020 | 30.950082 |
| O | 19.921198 | 3.393754 | 26.650254 | C  | 15.689591 | 4.782581 | 30.329903 |
| C | 20.774832 | 4.322449 | 26.409936 | C  | 14.582923 | 4.385399 | 31.074233 |
| C | 18.226927 | 4.022014 | 22.293999 | O  | 18.434937 | 6.427667 | 27.962775 |
| C | 18.992915 | 2.941012 | 21.873981 | O  | 17.905256 | 4.284243 | 28.428683 |
| C | 19.081890 | 2.638017 | 20.519979 | C  | 18.102646 | 5.501028 | 28.786111 |
| C | 18.404876 | 3.417023 | 19.587993 | Cu | 34.126310 | 5.987200 | 26.089034 |
| C | 17.639888 | 4.497024 | 20.008011 | Cu | 33.551789 | 3.584558 | 26.543220 |
| C | 17.550913 | 4.800019 | 21.362013 | C  | 37.810428 | 3.836259 | 26.412284 |
| C | 16.783924 | 5.881020 | 21.784030 | C  | 38.326233 | 3.092758 | 27.489711 |
| C | 16.107910 | 6.659026 | 20.850045 | C  | 39.671868 | 2.753213 | 27.544445 |
| C | 16.197885 | 6.355031 | 19.497042 | C  | 40.526980 | 3.141906 | 26.519435 |
| C | 16.963875 | 5.274030 | 19.076025 | C  | 40.050108 | 3.862470 | 25.408047 |
| O | 15.523872 | 7.185037 | 18.539057 | C  | 38.671631 | 4.201388 | 25.340775 |
| O | 18.566589 | 5.534636 | 24.104811 | C  | 38.186422 | 4.862058 | 24.193079 |
| O | 18.028183 | 3.394469 | 24.576217 | C  | 39.052885 | 5.208143 | 23.160384 |
| C | 18.267660 | 4.339912 | 23.743957 | C  | 40.412770 | 4.916459 | 23.243236 |
| C | 14.301000 | 5.801000 | 25.782000 | C  | 40.923900 | 4.237242 | 24.357851 |
| C | 13.829000 | 6.909000 | 26.476000 | O  | 41.267492 | 5.275409 | 22.206798 |
| C | 27.956207 | 7.032197 | 26.505965 | O  | 36.028958 | 5.413074 | 26.202683 |
| C | 27.120978 | 6.194168 | 25.775136 | O  | 35.510847 | 3.260445 | 26.637283 |
| C | 27.631757 | 5.081004 | 25.076105 | C  | 36.365085 | 4.192834 | 26.421274 |
| C | 29.026575 | 4.816167 | 25.131071 | C  | 33.846854 | 4.021972 | 22.293718 |
| C | 13.900000 | 3.935000 | 24.313000 | C  | 34.612831 | 2.940969 | 21.873683 |
| C | 28.703912 | 2.946048 | 23.616103 | C  | 34.701781 | 2.637978 | 20.519678 |



|   |           |          |           |    |           |          |           |
|---|-----------|----------|-----------|----|-----------|----------|-----------|
| C | 34.024753 | 3.416989 | 19.587708 | Cu | 49.687381 | 6.194920 | 25.986368 |
| C | 33.259776 | 4.496991 | 20.007741 | Cu | 49.348200 | 3.774899 | 26.563795 |
| C | 33.170826 | 4.799983 | 21.361747 | C  | 53.571003 | 4.464792 | 26.367939 |
| C | 32.403848 | 5.880986 | 21.783781 | C  | 54.157058 | 3.947774 | 27.515902 |
| C | 31.727821 | 6.658997 | 20.849810 | C  | 55.530059 | 3.732759 | 27.559826 |
| C | 31.817771 | 6.355005 | 19.496805 | C  | 56.316002 | 4.036762 | 26.454787 |
| C | 32.583748 | 5.274002 | 19.075771 | C  | 55.729946 | 4.554780 | 25.305823 |
| O | 31.143743 | 7.185016 | 18.538835 | C  | 54.356947 | 4.768795 | 25.262899 |
| O | 34.116988 | 5.496104 | 24.161846 | C  | 53.770890 | 5.287813 | 24.113936 |
| O | 33.609987 | 3.336919 | 24.568199 | C  | 54.557834 | 5.591815 | 23.007897 |
| C | 33.846807 | 4.307023 | 23.760581 | C  | 55.929834 | 5.377800 | 23.052821 |
| C | 29.866107 | 5.644536 | 25.926558 | C  | 56.515889 | 4.858782 | 24.200784 |
| C | 29.315867 | 6.761068 | 26.581023 | O  | 56.643771 | 5.617805 | 21.841785 |
| C | 43.530396 | 6.838114 | 26.562617 | O  | 51.632356 | 5.833805 | 26.124940 |
| C | 42.711717 | 5.967643 | 25.854309 | O  | 51.338020 | 3.655033 | 26.633752 |
| C | 43.243398 | 4.851571 | 25.175566 | C  | 52.092332 | 4.663762 | 26.380332 |
| C | 44.644427 | 4.613480 | 25.232646 | C  | 49.466779 | 4.021876 | 22.293156 |
| C | 29.549001 | 3.754989 | 24.364516 | C  | 50.232745 | 2.940872 | 21.873104 |
| C | 44.345413 | 2.683258 | 23.790816 | C  | 50.321669 | 2.637885 | 20.519096 |
| C | 42.976220 | 2.891150 | 23.744994 | C  | 49.644627 | 3.416901 | 19.587140 |
| C | 42.400202 | 3.981432 | 24.434854 | C  | 48.879661 | 4.496905 | 20.007192 |
| O | 42.223734 | 1.973309 | 23.015316 | C  | 48.790737 | 4.799893 | 21.361200 |
| O | 32.160923 | 6.305968 | 25.990791 | C  | 48.023772 | 5.880897 | 21.783251 |
| O | 31.655912 | 4.144013 | 26.387837 | C  | 47.347731 | 6.658913 | 20.849295 |
| C | 31.313109 | 5.349246 | 26.112288 | C  | 47.437655 | 6.354926 | 19.496287 |
| C | 33.679966 | 5.584291 | 30.321158 | C  | 48.203620 | 5.273922 | 19.075235 |
| C | 34.757805 | 6.253428 | 30.928931 | O  | 46.763613 | 7.184943 | 18.538331 |
| C | 32.543840 | 5.236848 | 31.104830 | O  | 49.726340 | 5.586859 | 24.092610 |
| C | 31.404135 | 4.637213 | 30.530862 | O  | 49.389029 | 3.418936 | 24.606680 |
| C | 30.302143 | 4.321856 | 31.321453 | C  | 49.524183 | 4.364848 | 23.750152 |
| O | 34.070108 | 6.238227 | 28.063068 | C  | 45.473344 | 5.496586 | 25.978679 |
| O | 33.526563 | 4.086122 | 28.468262 | C  | 44.897351 | 6.609138 | 26.619150 |
| C | 33.764130 | 5.283785 | 28.864875 | C  | 45.180618 | 3.528702 | 24.511449 |

|    |           |          |           |   |           |          |           |
|----|-----------|----------|-----------|---|-----------|----------|-----------|
| O  | 47.705792 | 6.316031 | 25.888199 | O | 18.653556 | 3.450163 | 42.089667 |
| O  | 47.397066 | 4.146344 | 26.421180 | C | 19.499042 | 4.392228 | 41.873887 |
| C  | 46.945049 | 5.304226 | 26.098019 | C | 16.899511 | 4.145258 | 37.734453 |
| C  | 49.185355 | 5.978101 | 30.217883 | C | 17.601230 | 3.040879 | 37.219520 |
| C  | 50.110001 | 6.846905 | 30.825531 | C | 17.613679 | 2.778225 | 35.856494 |
| C  | 48.082109 | 5.491956 | 30.973995 | C | 16.923257 | 3.611817 | 34.983605 |
| C  | 47.068066 | 4.705994 | 30.386182 | C | 16.180920 | 4.713804 | 35.457279 |
| C  | 46.006871 | 4.234803 | 31.152881 | C | 16.149545 | 4.971859 | 36.853511 |
| O  | 49.595835 | 6.551878 | 27.940744 | C | 15.345288 | 6.024759 | 37.334322 |
| O  | 49.299014 | 4.375419 | 28.456572 | C | 14.634411 | 6.826093 | 36.450112 |
| C  | 49.379189 | 5.612948 | 28.788233 | C | 14.690586 | 6.612802 | 35.082957 |
| C  | 11.158286 | 7.260970 | 41.959133 | C | 15.470091 | 5.555605 | 34.561398 |
| C  | 10.287269 | 6.502976 | 41.186145 | O | 13.974650 | 7.496688 | 34.278418 |
| C  | 10.757253 | 5.394976 | 40.491133 | O | 17.247008 | 5.613406 | 39.576156 |
| C  | 12.099253 | 5.042971 | 40.571108 | O | 16.752861 | 3.455855 | 40.012386 |
| C  | 11.698221 | 3.178978 | 39.103109 | C | 16.972908 | 4.419386 | 39.193754 |
| C  | 10.356221 | 3.528983 | 39.024134 | C | 12.972270 | 5.800966 | 41.346096 |
| C  | 9.886237  | 4.637982 | 39.718146 | C | 12.500286 | 6.908965 | 42.040108 |
| O  | 9.453204  | 2.792989 | 38.218147 | C | 26.791182 | 6.874167 | 42.538323 |
| Cu | 17.238250 | 6.144506 | 41.487977 | C | 25.952682 | 6.135142 | 41.728368 |
| Cu | 16.685958 | 3.745008 | 41.980649 | C | 26.431519 | 5.043529 | 40.931598 |
| C  | 20.953443 | 4.060853 | 41.900959 | C | 27.834802 | 4.730012 | 41.021433 |
| C  | 21.445223 | 3.295529 | 42.974305 | C | 12.571237 | 3.934972 | 39.877096 |
| C  | 22.793830 | 2.977610 | 43.068240 | C | 27.541034 | 2.966359 | 39.378079 |
| C  | 23.678262 | 3.406879 | 42.085480 | C | 26.152450 | 3.256672 | 39.287845 |
| C  | 23.231855 | 4.154137 | 40.980045 | C | 25.585970 | 4.272205 | 40.055579 |
| C  | 21.849956 | 4.476505 | 40.874940 | O | 25.494399 | 2.439809 | 38.411226 |
| C  | 21.397685 | 5.166159 | 39.731351 | O | 15.273255 | 6.435570 | 41.361506 |
| C  | 22.296788 | 5.556192 | 38.743161 | O | 14.774818 | 4.283092 | 41.808690 |
| C  | 23.655036 | 5.272662 | 38.861409 | C | 14.425755 | 5.481886 | 41.506768 |
| C  | 24.133517 | 4.564973 | 39.969602 | C | 16.702715 | 5.831146 | 45.712463 |
| O  | 24.534096 | 5.652970 | 37.855413 | C | 17.713110 | 6.591735 | 46.329516 |
| O  | 19.147040 | 5.603527 | 41.634548 | C | 18.806701 | 6.939091 | 32.206607 |

|    |           |          |           |   |           |          |           |
|----|-----------|----------|-----------|---|-----------|----------|-----------|
| C  | 17.708858 | 6.502278 | 32.939587 | C | 31.384488 | 6.155821 | 37.491871 |
| C  | 16.677423 | 5.759050 | 32.333572 | C | 30.991933 | 7.082484 | 36.560973 |
| C  | 15.568748 | 5.429531 | 46.472817 | C | 30.990384 | 6.776517 | 35.174232 |
| C  | 14.483839 | 4.746711 | 45.883478 | C | 31.364258 | 5.510845 | 34.732415 |
| C  | 13.390784 | 4.361319 | 46.653677 | O | 30.602108 | 7.827733 | 34.389990 |
| C  | 14.518274 | 4.636774 | 32.442379 | O | 32.846551 | 5.307348 | 39.782158 |
| C  | 15.553570 | 5.331175 | 33.082485 | O | 32.142968 | 3.247195 | 40.336703 |
| O  | 13.408543 | 4.230460 | 33.174940 | C | 32.401064 | 4.158957 | 39.492371 |
| O  | 17.153237 | 6.438814 | 43.452917 | C | 28.672783 | 5.519319 | 41.869946 |
| O  | 16.646014 | 4.285245 | 43.893553 | C | 28.169512 | 6.578987 | 42.601170 |
| C  | 16.846064 | 5.496846 | 44.268428 | C | 42.282457 | 7.206410 | 42.068224 |
| Cu | 32.932179 | 6.127311 | 41.585165 | C | 41.465250 | 6.409624 | 41.275173 |
| Cu | 32.420283 | 3.665814 | 42.252521 | C | 41.996081 | 5.350121 | 40.512769 |
| C  | 36.607821 | 4.013075 | 41.741041 | C | 43.392410 | 5.089460 | 40.573136 |
| C  | 37.128529 | 3.170998 | 42.706856 | C | 28.358074 | 3.673303 | 40.221409 |
| C  | 38.507970 | 2.870573 | 42.714338 | C | 43.097067 | 3.304451 | 38.955828 |
| C  | 39.342550 | 3.393840 | 41.750374 | C | 41.730132 | 3.526159 | 38.914782 |
| C  | 38.848170 | 4.238928 | 40.703609 | C | 41.160287 | 4.554246 | 39.691961 |
| C  | 37.439724 | 4.545786 | 40.701694 | O | 40.975892 | 2.680463 | 38.106088 |
| C  | 36.918297 | 5.333091 | 39.634973 | O | 30.921104 | 6.174521 | 41.639619 |
| C  | 37.741271 | 5.809345 | 38.642332 | O | 30.496317 | 4.088854 | 42.358931 |
| C  | 39.138687 | 5.551206 | 38.660834 | C | 30.136787 | 5.237077 | 41.961033 |
| C  | 39.695579 | 4.771510 | 39.672750 | C | 32.422747 | 5.983127 | 45.791183 |
| O  | 39.935305 | 6.063311 | 37.681396 | C | 33.293383 | 6.877113 | 46.387198 |
| O  | 34.830659 | 5.571220 | 41.687303 | C | 34.749556 | 6.534389 | 32.288800 |
| O  | 34.359537 | 3.402079 | 42.083045 | C | 33.655463 | 6.170745 | 33.065534 |
| C  | 35.153774 | 4.356823 | 41.836129 | C | 32.537031 | 5.534830 | 32.495232 |
| C  | 32.197823 | 3.843975 | 38.044160 | C | 31.291940 | 5.466349 | 46.505328 |
| C  | 32.476637 | 2.550289 | 37.633444 | C | 30.306620 | 4.648065 | 45.881421 |
| C  | 32.429067 | 2.217844 | 36.264357 | C | 29.215901 | 4.199286 | 46.584961 |
| C  | 32.092602 | 3.171787 | 35.326630 | C | 30.300812 | 4.596505 | 32.687368 |
| C  | 31.745770 | 4.511190 | 35.696415 | C | 31.408050 | 5.209656 | 33.282074 |
| C  | 31.788746 | 4.845624 | 37.098335 | O | 29.189964 | 4.283820 | 33.460069 |

|    |           |          |           |    |           |          |           |
|----|-----------|----------|-----------|----|-----------|----------|-----------|
| O  | 32.934268 | 6.511297 | 43.549245 | C  | 44.216457 | 5.884090 | 41.416608 |
| O  | 32.615657 | 4.350620 | 44.095330 | C  | 43.644709 | 6.949596 | 42.135216 |
| C  | 32.678328 | 5.582609 | 44.371730 | C  | 43.929984 | 4.068068 | 39.765945 |
| Cu | 48.451353 | 6.404301 | 41.573756 | O  | 46.479669 | 6.622603 | 41.444818 |
| Cu | 47.998449 | 3.978766 | 42.047612 | O  | 46.070998 | 4.439867 | 41.841807 |
| C  | 52.242278 | 4.464620 | 41.931334 | C  | 45.675008 | 5.631729 | 41.572621 |
| C  | 52.828353 | 3.947597 | 43.079285 | C  | 47.843729 | 6.057421 | 45.781282 |
| C  | 54.201353 | 3.732577 | 43.123183 | C  | 48.785679 | 6.887232 | 46.417225 |
| C  | 54.987278 | 4.036581 | 42.018131 | C  | 49.988532 | 7.195259 | 32.164653 |
| C  | 54.401203 | 4.554604 | 40.869180 | C  | 48.938669 | 6.686084 | 32.921068 |
| C  | 53.028203 | 4.768624 | 40.826281 | C  | 47.974479 | 5.834587 | 32.348227 |
| C  | 52.442128 | 5.287648 | 39.677330 | C  | 46.720928 | 5.584278 | 46.517299 |
| C  | 53.229054 | 5.591652 | 38.571278 | C  | 45.690402 | 4.839643 | 45.905090 |
| C  | 54.601054 | 5.377632 | 38.616177 | C  | 44.612674 | 4.377822 | 46.654628 |
| C  | 55.187129 | 4.858609 | 39.764128 | C  | 45.926480 | 4.526204 | 32.512090 |
| O  | 55.314970 | 5.617639 | 37.405129 | C  | 46.897354 | 5.333352 | 33.120374 |
| O  | 50.375134 | 5.934729 | 41.729163 | O  | 44.863598 | 4.043889 | 33.267506 |
| O  | 49.973361 | 3.761190 | 42.185667 | O  | 48.337104 | 6.684857 | 43.537426 |
| C  | 50.776091 | 4.736728 | 41.959867 | O  | 47.900298 | 4.512357 | 43.960543 |
| C  | 48.304136 | 4.389376 | 37.810888 | C  | 48.042940 | 5.730098 | 44.342372 |
| C  | 49.127935 | 3.358473 | 37.325349 | C  | 9.830848  | 7.260896 | 57.522290 |
| C  | 49.194193 | 3.080256 | 35.967218 | C  | 8.959816  | 6.502907 | 56.749315 |
| C  | 48.434881 | 3.822889 | 35.070004 | C  | 9.429783  | 5.394908 | 56.054291 |
| C  | 47.577413 | 4.851848 | 35.512945 | C  | 10.771783 | 5.042898 | 56.134241 |
| C  | 47.498951 | 5.129879 | 36.903846 | C  | 10.370718 | 3.178911 | 54.666243 |
| C  | 46.595417 | 6.112902 | 37.353867 | C  | 9.028718  | 3.528920 | 54.587293 |
| C  | 45.823951 | 6.825744 | 36.444946 | C  | 8.558750  | 4.637919 | 55.281317 |
| C  | 45.914786 | 6.588728 | 35.083146 | O  | 8.125684  | 2.792932 | 53.781319 |
| C  | 46.797132 | 5.599655 | 34.591980 | Cu | 15.891522 | 6.155334 | 57.135290 |
| O  | 45.128147 | 7.383745 | 34.252268 | Cu | 15.352118 | 3.737379 | 57.544434 |
| O  | 48.497783 | 5.881555 | 39.657128 | C  | 19.606139 | 4.079052 | 57.412957 |
| O  | 48.118689 | 3.698481 | 40.082379 | C  | 20.169417 | 3.302784 | 58.441645 |
| C  | 48.307345 | 4.672820 | 39.269370 | C  | 21.524003 | 2.994493 | 58.442266 |

|   |           |          |           |    |           |          |           |
|---|-----------|----------|-----------|----|-----------|----------|-----------|
| C | 22.339706 | 3.448919 | 57.411476 | C  | 24.689444 | 3.367450 | 54.526486 |
| C | 21.814518 | 4.206837 | 56.347207 | C  | 24.127015 | 4.407257 | 55.301345 |
| C | 20.427205 | 4.511822 | 56.333763 | O  | 23.924685 | 2.507377 | 53.741167 |
| C | 19.892913 | 5.206384 | 55.227518 | O  | 13.936013 | 6.439336 | 56.974158 |
| C | 20.720276 | 5.624407 | 54.189930 | O  | 13.441968 | 4.274243 | 57.363446 |
| C | 22.088438 | 5.367379 | 54.222861 | C  | 13.093013 | 5.478540 | 57.082763 |
| C | 22.647293 | 4.649394 | 55.289004 | C  | 15.283046 | 5.695821 | 61.352095 |
| O | 22.903312 | 5.792369 | 53.179590 | C  | 16.314087 | 6.385804 | 61.978046 |
| O | 17.796353 | 5.623539 | 57.297908 | C  | 17.640265 | 6.917722 | 47.677373 |
| O | 17.318956 | 3.448123 | 57.660625 | C  | 16.552075 | 6.498336 | 48.433801 |
| C | 18.155017 | 4.403510 | 57.470893 | C  | 15.505535 | 5.755631 | 47.854498 |
| C | 15.687578 | 4.242123 | 53.318160 | C  | 14.198081 | 5.242825 | 62.095148 |
| C | 16.418874 | 3.147111 | 52.823636 | C  | 13.166040 | 4.552842 | 61.469196 |
| C | 16.471812 | 2.881015 | 51.462663 | C  | 12.083075 | 4.099846 | 62.213249 |
| C | 15.788830 | 3.698571 | 50.569936 | C  | 13.345678 | 4.642201 | 48.017051 |
| C | 15.023693 | 4.794753 | 51.019639 | C  | 14.390423 | 5.348848 | 48.628158 |
| C | 14.960636 | 5.063985 | 52.413830 | O  | 12.246050 | 4.252167 | 48.773486 |
| C | 14.145010 | 6.119266 | 52.868151 | O  | 15.754589 | 6.387479 | 59.110258 |
| C | 13.451891 | 6.911347 | 51.961506 | O  | 15.284268 | 4.211934 | 59.472401 |
| C | 13.530613 | 6.680860 | 50.597910 | C  | 15.446195 | 5.415018 | 59.890971 |
| C | 14.317809 | 5.616956 | 50.101782 | Cu | 31.463903 | 6.174286 | 57.130653 |
| O | 12.825683 | 7.552960 | 49.770980 | Cu | 30.949634 | 3.749534 | 57.533970 |
| O | 15.948098 | 5.679682 | 55.205198 | C  | 35.196960 | 4.101980 | 57.427724 |
| O | 15.451326 | 3.509931 | 55.571706 | C  | 35.734129 | 3.349155 | 58.488031 |
| C | 15.694991 | 4.493172 | 54.784355 | C  | 37.080459 | 3.009437 | 58.512937 |
| C | 11.644816 | 5.800887 | 56.909216 | C  | 37.914730 | 3.406396 | 57.474164 |
| C | 11.172849 | 6.908886 | 57.603240 | C  | 37.417613 | 4.142454 | 56.381571 |
| C | 25.305491 | 7.115481 | 57.593251 | C  | 36.038544 | 4.484353 | 56.346321 |
| C | 24.472279 | 6.308731 | 56.827083 | C  | 35.532607 | 5.163004 | 55.218113 |
| C | 24.983977 | 5.222865 | 56.086761 | C  | 36.379735 | 5.525216 | 54.175141 |
| C | 26.378961 | 4.955324 | 56.132828 | C  | 37.740100 | 5.229636 | 54.226568 |
| C | 11.243751 | 3.934900 | 55.440217 | C  | 38.271473 | 4.529373 | 55.318590 |
| C | 26.056834 | 3.146973 | 54.545614 | O  | 38.575038 | 5.603265 | 53.179625 |

|   |           |          |           |    |           |          |           |
|---|-----------|----------|-----------|----|-----------|----------|-----------|
| O | 33.380608 | 5.645637 | 57.257414 | C  | 33.115304 | 7.239235 | 47.740611 |
| O | 32.913254 | 3.472765 | 57.647288 | C  | 32.066876 | 6.721432 | 48.471264 |
| C | 33.745062 | 4.429187 | 57.451881 | C  | 31.109922 | 5.828549 | 47.887734 |
| C | 31.277411 | 4.265404 | 53.305162 | C  | 29.818167 | 5.242646 | 62.094340 |
| C | 32.080221 | 3.217713 | 52.819404 | C  | 28.786113 | 4.552669 | 61.468405 |
| C | 32.163922 | 2.954074 | 51.459439 | C  | 27.703159 | 4.099675 | 62.212476 |
| C | 31.439582 | 3.725071 | 50.558135 | C  | 29.056891 | 4.503162 | 47.963631 |
| C | 30.599642 | 4.767712 | 50.998096 | C  | 29.987639 | 5.307894 | 48.618504 |
| C | 30.508812 | 5.037919 | 52.391012 | O  | 27.987963 | 4.007364 | 48.646322 |
| C | 29.628915 | 6.044961 | 52.833033 | O  | 31.364873 | 6.394423 | 59.109265 |
| C | 28.885628 | 6.778530 | 51.914183 | O  | 30.889773 | 4.218924 | 59.464405 |
| C | 28.983003 | 6.539973 | 50.552581 | C  | 31.059477 | 5.419578 | 59.887835 |
| C | 29.846230 | 5.534117 | 50.075022 | Cu | 47.055651 | 6.260771 | 57.153125 |
| O | 28.219999 | 7.345509 | 49.711536 | Cu | 46.686572 | 3.803902 | 57.527529 |
| O | 31.485947 | 5.712570 | 55.192979 | C  | 50.914829 | 4.464394 | 57.493750 |
| O | 31.045828 | 3.530435 | 55.558667 | C  | 51.500923 | 3.947364 | 58.641689 |
| C | 31.264397 | 4.519981 | 54.771534 | C  | 52.873923 | 3.732339 | 58.685563 |
| C | 27.217349 | 5.754617 | 56.957700 | C  | 53.659830 | 4.036343 | 57.580498 |
| C | 26.664535 | 6.841917 | 57.658102 | C  | 53.073736 | 4.554373 | 56.431559 |
| C | 40.919690 | 6.964412 | 57.659376 | C  | 51.700736 | 4.768398 | 56.388685 |
| C | 40.090252 | 6.158056 | 56.891158 | C  | 51.114643 | 5.287428 | 55.239746 |
| C | 40.604860 | 5.074970 | 56.148496 | C  | 51.901549 | 5.591433 | 54.133681 |
| C | 42.001769 | 4.810587 | 56.192851 | C  | 53.273549 | 5.377407 | 54.178555 |
| C | 26.901752 | 3.922815 | 55.329273 | C  | 53.859642 | 4.858378 | 55.326493 |
| C | 41.677328 | 2.989238 | 54.621977 | O  | 53.987445 | 5.617415 | 52.967495 |
| C | 40.310435 | 3.214753 | 54.595073 | O  | 48.995154 | 5.863872 | 57.303430 |
| C | 39.748177 | 4.262802 | 55.358949 | O  | 48.671314 | 3.659467 | 57.665666 |
| O | 39.545715 | 2.350364 | 53.814639 | C  | 49.438696 | 4.675517 | 57.498128 |
| O | 29.497139 | 6.448322 | 57.017112 | C  | 46.976219 | 4.387862 | 53.312763 |
| O | 29.037956 | 4.267274 | 57.363193 | C  | 47.814338 | 3.383025 | 52.797313 |
| C | 28.669601 | 5.472829 | 57.119907 | C  | 47.871936 | 3.133393 | 51.433674 |
| C | 30.903120 | 5.695641 | 61.351269 | C  | 47.089466 | 3.878803 | 50.559757 |
| C | 31.934175 | 6.385618 | 61.977205 | C  | 46.220531 | 4.885378 | 51.031219 |

|   |           |          |           |   |           |          |           |
|---|-----------|----------|-----------|---|-----------|----------|-----------|
| C | 46.151263 | 5.134491 | 52.428401 | C | 13.063191 | 5.025817 | 64.207206 |
| C | 45.235352 | 6.092407 | 52.906168 | O | 10.943187 | 3.908837 | 64.361307 |
| C | 44.444823 | 6.811264 | 52.018520 | C | 31.882275 | 6.620600 | 63.346211 |
| C | 44.526305 | 6.603282 | 50.651372 | C | 30.799322 | 6.168606 | 64.089282 |
| C | 45.419405 | 5.638222 | 50.131841 | C | 29.767267 | 5.478629 | 63.464346 |
| O | 43.722357 | 7.405826 | 49.844686 | C | 27.651260 | 4.336658 | 63.581482 |
| O | 47.127066 | 5.819006 | 55.215411 | C | 28.683314 | 5.025635 | 64.206417 |
| O | 46.816133 | 3.610217 | 55.554876 | O | 26.563309 | 3.908663 | 64.360554 |
| C | 46.972439 | 4.620725 | 54.780567 | C | 47.502389 | 6.620356 | 63.345091 |
| C | 42.840918 | 5.624034 | 57.003065 | C | 46.419447 | 6.168363 | 64.088179 |
| C | 42.280310 | 6.702261 | 57.713121 | C | 45.387379 | 5.478391 | 63.463260 |
| C | 42.523728 | 3.772130 | 55.397558 | C | 43.271369 | 4.336426 | 63.580429 |
| O | 45.082212 | 6.414828 | 57.026493 | C | 44.303437 | 5.025398 | 64.205349 |
| O | 44.742469 | 4.207977 | 57.344661 | O | 42.183431 | 3.908432 | 64.359519 |
| C | 44.307878 | 5.397128 | 57.124541 | H | 12.119292 | 8.127223 | 26.935541 |
| C | 46.523195 | 5.695406 | 61.350162 | H | 10.573036 | 6.786857 | 25.566326 |
| C | 47.554262 | 6.385378 | 61.976082 | H | 13.383710 | 2.323187 | 22.982608 |
| C | 48.661418 | 7.210315 | 47.761676 | H | 9.847384  | 3.169534 | 22.677183 |
| C | 47.591475 | 6.714339 | 48.496981 | H | 22.128855 | 2.878336 | 28.234723 |
| C | 46.611011 | 5.899901 | 47.898233 | H | 24.524568 | 2.323825 | 28.277132 |
| C | 45.438253 | 5.242413 | 62.093251 | H | 26.001623 | 3.075333 | 26.483803 |
| C | 44.406185 | 4.552442 | 61.467332 | H | 21.487785 | 5.249430 | 24.044641 |
| C | 43.323243 | 4.099449 | 62.211421 | H | 22.971879 | 5.937283 | 22.267790 |
| C | 44.531205 | 4.638665 | 48.020107 | H | 19.532717 | 2.330044 | 22.589896 |
| C | 45.517142 | 5.408043 | 48.652918 | H | 19.679477 | 1.794178 | 20.190515 |
| O | 43.451858 | 4.165480 | 48.757601 | H | 18.480499 | 3.170813 | 18.536728 |
| O | 46.924761 | 6.447470 | 59.126507 | H | 16.649980 | 6.144787 | 22.827018 |
| O | 46.571188 | 4.243086 | 59.457644 | H | 15.506631 | 7.500795 | 21.165206 |
| C | 46.675333 | 5.446344 | 59.890404 | H | 14.495691 | 7.508802 | 27.086848 |
| C | 16.262162 | 6.620790 | 63.347051 | H | 27.544390 | 7.892515 | 27.024129 |
| C | 15.179196 | 6.168795 | 64.090104 | H | 26.067709 | 6.434857 | 25.745019 |
| C | 14.147156 | 5.478812 | 63.465153 | H | 14.941446 | 3.633620 | 24.312812 |
| C | 12.031150 | 4.336833 | 63.582254 | H | 29.112826 | 2.128754 | 23.037196 |

|   |           |          |           |   |           |          |           |
|---|-----------|----------|-----------|---|-----------|----------|-----------|
| H | 19.776906 | 6.959637 | 30.302797 | H | 50.920785 | 1.795180 | 20.189773 |
| H | 15.678100 | 4.569578 | 29.266264 | H | 49.720358 | 3.170933 | 18.535926 |
| H | 13.771745 | 3.871103 | 30.576881 | H | 47.862763 | 6.134480 | 22.823774 |
| H | 15.671866 | 6.861099 | 17.596378 | H | 46.741177 | 7.496787 | 21.164899 |
| H | 25.094740 | 6.080172 | 21.433310 | H | 45.521778 | 7.300979 | 27.173038 |
| H | 25.588912 | 2.485300 | 22.858991 | H | 46.244308 | 3.321880 | 24.481606 |
| H | 37.673078 | 2.784603 | 28.298330 | H | 50.937041 | 7.247183 | 30.250249 |
| H | 40.055700 | 2.186978 | 28.387465 | H | 47.070039 | 4.455635 | 29.330869 |
| H | 41.569179 | 2.861991 | 26.594490 | H | 45.243476 | 3.631840 | 30.680101 |
| H | 37.136923 | 5.109780 | 24.071672 | H | 46.913204 | 6.861936 | 17.595746 |
| H | 38.657766 | 5.715916 | 22.290953 | H | 56.056144 | 5.976916 | 21.104057 |
| H | 35.146104 | 2.325240 | 22.590313 | H | 10.790976 | 8.128083 | 42.498432 |
| H | 35.297709 | 1.792927 | 20.190421 | H | 9.244443  | 6.787065 | 41.130005 |
| H | 34.099756 | 3.170442 | 18.536518 | H | 12.055519 | 2.325066 | 38.544075 |
| H | 32.269117 | 6.145226 | 22.826304 | H | 8.519278  | 3.170935 | 38.240000 |
| H | 31.125577 | 7.500075 | 21.165083 | H | 20.770376 | 2.953700 | 43.751062 |
| H | 29.951149 | 7.414422 | 27.168037 | H | 23.157589 | 2.394848 | 43.908935 |
| H | 43.101768 | 7.697636 | 27.068403 | H | 24.721539 | 3.137374 | 42.190245 |
| H | 41.653339 | 6.184394 | 25.829323 | H | 20.349332 | 5.398995 | 39.575118 |
| H | 30.610683 | 3.541548 | 24.316365 | H | 21.924656 | 6.082910 | 37.874542 |
| H | 44.764150 | 1.847360 | 23.246573 | H | 18.152750 | 2.388272 | 37.886631 |
| H | 35.618886 | 6.544135 | 30.337422 | H | 18.165768 | 1.926271 | 35.472286 |
| H | 31.343147 | 4.414637 | 29.469908 | H | 16.958184 | 3.375320 | 33.929601 |
| H | 29.439700 | 3.860781 | 30.858716 | H | 15.240148 | 6.237771 | 38.392000 |
| H | 31.291693 | 6.860811 | 17.596363 | H | 14.023748 | 7.635428 | 36.827431 |
| H | 40.793345 | 5.790108 | 21.479982 | H | 13.169313 | 7.511492 | 42.645374 |
| H | 41.239475 | 2.180964 | 23.018429 | H | 26.396714 | 7.704135 | 43.132981 |
| H | 53.552011 | 3.699701 | 28.381160 | H | 24.892876 | 6.408004 | 41.696563 |
| H | 55.987694 | 3.325991 | 28.455688 | H | 13.612084 | 3.634289 | 39.867747 |
| H | 57.384069 | 3.866316 | 26.497848 | H | 27.933432 | 2.162732 | 38.749412 |
| H | 52.703450 | 5.452774 | 24.015157 | H | 18.569613 | 6.924724 | 45.754180 |
| H | 54.081129 | 5.976133 | 22.116856 | H | 19.585040 | 7.522457 | 32.688588 |
| H | 50.777290 | 2.334582 | 22.589267 | H | 17.663033 | 6.764077 | 33.988093 |



|   |           |          |           |   |           |          |           |
|---|-----------|----------|-----------|---|-----------|----------|-----------|
| H | 14.456045 | 4.511393 | 44.824975 | H | 51.374685 | 5.452690 | 39.579208 |
| H | 12.573515 | 3.834708 | 46.179744 | H | 52.752229 | 5.975719 | 37.680067 |
| H | 12.749227 | 3.710299 | 32.615608 | H | 49.730733 | 2.775141 | 38.012136 |
| H | 14.034985 | 7.274631 | 33.299417 | H | 49.839076 | 2.285199 | 35.606290 |
| H | 24.084777 | 6.200632 | 37.136190 | H | 48.511046 | 3.573621 | 34.021224 |
| H | 24.560908 | 2.677904 | 38.303713 | H | 46.461430 | 6.338365 | 38.405927 |
| H | 36.463121 | 2.757711 | 43.469068 | H | 45.134243 | 7.580601 | 36.798354 |
| H | 38.916422 | 2.218605 | 43.492934 | H | 44.266979 | 7.578081 | 42.762289 |
| H | 40.406936 | 3.141905 | 41.786961 | H | 44.992662 | 3.850969 | 39.738280 |
| H | 35.850234 | 5.552248 | 39.594788 | H | 49.627670 | 7.279455 | 45.858211 |
| H | 37.318859 | 6.403114 | 37.822523 | H | 50.713735 | 7.861854 | 32.620936 |
| H | 32.758413 | 1.805389 | 38.381304 | H | 48.875268 | 6.976365 | 33.961186 |
| H | 32.673317 | 1.200342 | 35.943357 | H | 45.691475 | 4.615231 | 44.844110 |
| H | 32.084660 | 2.878167 | 34.272063 | H | 43.837034 | 3.805848 | 46.163547 |
| H | 31.384089 | 6.424628 | 38.546901 | H | 44.248710 | 3.450076 | 32.731348 |
| H | 30.670725 | 8.084076 | 36.860271 | H | 45.224024 | 7.150726 | 33.278671 |
| H | 28.832680 | 7.176160 | 43.229277 | H | 54.726531 | 5.972693 | 36.665929 |
| H | 41.855562 | 8.027251 | 42.635993 | H | 9.463399  | 8.127109 | 58.062853 |
| H | 40.408878 | 6.641785 | 41.248934 | H | 7.916946  | 6.786720 | 56.693530 |
| H | 29.419300 | 3.420240 | 40.275445 | H | 10.728169 | 2.325384 | 54.106726 |
| H | 43.516743 | 2.517995 | 38.342242 | H | 7.191740  | 3.170751 | 53.803257 |
| H | 34.124896 | 7.284059 | 45.805712 | H | 19.546867 | 2.944509 | 59.253514 |
| H | 35.597364 | 7.035897 | 32.745155 | H | 21.945941 | 2.401007 | 59.247280 |
| H | 33.686526 | 6.399718 | 34.123299 | H | 23.389597 | 3.190561 | 57.443891 |
| H | 30.403710 | 4.375521 | 44.830303 | H | 18.834307 | 5.425560 | 55.139833 |
| H | 28.459762 | 3.586512 | 46.080007 | H | 20.287161 | 6.157377 | 53.354275 |
| H | 28.473481 | 3.807963 | 32.931790 | H | 16.958459 | 2.500826 | 53.506541 |
| H | 30.549859 | 7.595362 | 33.449733 | H | 17.045805 | 2.035745 | 51.096013 |
| H | 39.400334 | 6.584743 | 37.061327 | H | 15.851557 | 3.455999 | 49.518668 |
| H | 39.988635 | 2.885986 | 38.125797 | H | 14.019583 | 6.342893 | 53.921468 |
| H | 52.223991 | 3.710387 | 43.947918 | H | 12.834374 | 7.724776 | 52.318247 |
| H | 54.659345 | 3.328203 | 44.019913 | H | 11.840450 | 7.509607 | 58.212083 |
| H | 56.055412 | 3.866650 | 42.061230 | H | 24.893213 | 7.954395 | 58.144987 |

|   |           |          |           |   |           |          |           |
|---|-----------|----------|-----------|---|-----------|----------|-----------|
| H | 23.419820 | 6.553045 | 56.802796 | H | 28.292391 | 7.085807 | 48.739468 |
| H | 12.285038 | 3.636243 | 55.427117 | H | 38.089230 | 6.128903 | 52.468364 |
| H | 26.465838 | 2.353649 | 53.934267 | H | 38.565764 | 2.575991 | 53.822527 |
| H | 17.168075 | 6.740032 | 61.410658 | H | 50.894922 | 3.700529 | 59.506444 |
| H | 18.432707 | 7.498032 | 48.139878 | H | 53.331584 | 3.325647 | 59.581346 |
| H | 16.527597 | 6.770590 | 49.480349 | H | 54.727848 | 3.865728 | 57.623137 |
| H | 13.130836 | 4.374522 | 60.400654 | H | 50.047651 | 5.459410 | 55.145286 |
| H | 11.278104 | 3.573997 | 61.719325 | H | 51.424893 | 5.977051 | 53.243021 |
| H | 11.577010 | 3.724193 | 48.233474 | H | 48.430558 | 2.793083 | 53.466230 |
| H | 12.919154 | 7.331415 | 48.794389 | H | 48.525350 | 2.355945 | 51.050520 |
| H | 22.396462 | 6.323929 | 52.487671 | H | 47.156979 | 3.648561 | 49.506201 |
| H | 22.944468 | 2.731769 | 53.751071 | H | 45.105638 | 6.293333 | 53.963699 |
| H | 35.095294 | 3.027806 | 59.302801 | H | 43.746553 | 7.547705 | 52.393414 |
| H | 37.480289 | 2.432389 | 59.340859 | H | 42.912671 | 7.342219 | 58.318057 |
| H | 38.956913 | 3.121122 | 57.523539 | H | 43.584912 | 3.556439 | 55.349055 |
| H | 34.481833 | 5.414363 | 55.119876 | H | 48.405614 | 6.744907 | 61.407981 |
| H | 35.969074 | 6.047131 | 53.321417 | H | 49.399651 | 7.847671 | 48.238216 |
| H | 32.652952 | 2.607315 | 53.508492 | H | 47.526217 | 6.985589 | 49.541973 |
| H | 32.793476 | 2.145999 | 51.099975 | H | 44.381439 | 4.364306 | 60.399424 |
| H | 31.527592 | 3.483826 | 49.507089 | H | 42.519341 | 3.571630 | 61.717714 |
| H | 29.492057 | 6.271848 | 53.885316 | H | 42.826712 | 3.598181 | 48.204694 |
| H | 28.211233 | 7.550381 | 52.261461 | H | 43.806724 | 7.190193 | 48.866223 |
| H | 27.298698 | 7.472282 | 58.271042 | H | 53.398692 | 5.970814 | 52.227674 |
| H | 40.504528 | 7.799350 | 58.215008 | H | 17.068201 | 7.158110 | 63.835991 |
| H | 39.037476 | 6.400209 | 56.869686 | H | 15.148083 | 6.357292 | 65.155550 |
| H | 27.963229 | 3.707903 | 55.279749 | H | 10.263157 | 3.421775 | 63.797076 |
| H | 42.085653 | 2.189801 | 54.018283 | H | 32.688068 | 7.158307 | 63.835060 |
| H | 32.787217 | 6.740914 | 61.409196 | H | 30.767941 | 6.357329 | 65.154661 |
| H | 33.817424 | 7.933123 | 48.213317 | H | 25.881862 | 3.424130 | 63.795740 |
| H | 31.960153 | 7.020767 | 49.518578 | H | 48.307513 | 7.159135 | 63.833759 |
| H | 28.748062 | 4.375542 | 60.400007 | H | 46.387765 | 6.357309 | 65.153493 |
| H | 26.897525 | 3.574889 | 61.718378 | H | 41.501220 | 3.425122 | 63.794463 |
| H | 27.451200 | 3.451790 | 48.057936 | H | 54.922556 | 4.682785 | 55.325779 |

|   |           |           |           |            |           |           |           |
|---|-----------|-----------|-----------|------------|-----------|-----------|-----------|
| H | 56.250097 | 4.683171  | 39.763700 | H          | 32.099433 | 9.941567  | 39.089462 |
| H | 57.578892 | 4.683412  | 24.200625 | H          | 33.579480 | 9.850563  | 42.998684 |
| H | 32.654232 | 5.043308  | 18.026530 | H          | 27.803644 | 10.664901 | 43.302432 |
| H | 17.034810 | 5.043582  | 18.026682 | H          | 26.632672 | 10.509360 | 45.476593 |
| H | 10.176547 | 4.915299  | 24.089643 | H          | 27.688335 | 9.310627  | 47.409065 |
| H | 8.847999  | 4.915598  | 39.653310 | H          | 29.948162 | 8.252587  | 47.088630 |
| H | 7.520561  | 4.915556  | 55.216444 | H          | 31.108925 | 8.392313  | 44.948320 |
| H | 12.998950 | 5.198991  | 65.269024 | H          | 33.766798 | 8.698218  | 41.139702 |
| H | 28.618759 | 5.198985  | 65.268152 | H          | 29.758177 | 10.302918 | 42.065783 |
| H | 44.238629 | 5.198825  | 65.267036 |            |           |           |           |
| H | 48.273990 | 5.043163  | 18.026055 |            |           |           |           |
| C | 31.784209 | 8.965730  | 40.986375 | (S,S)-1-RC |           |           |           |
| C | 31.549297 | 9.257704  | 42.482529 | C          | 12.487000 | 7.261000  | 26.395000 |
| C | 32.565751 | 10.299555 | 43.005129 | C          | 11.616000 | 6.503000  | 25.622000 |
| C | 32.556105 | 11.579479 | 42.156702 | C          | 12.086000 | 5.395000  | 24.927000 |
| C | 32.834566 | 11.270500 | 40.676436 | C          | 13.428000 | 5.043000  | 25.007000 |
| C | 31.845086 | 10.230306 | 40.124822 | C          | 13.027000 | 3.179000  | 23.539000 |
| O | 32.995076 | 8.190427  | 40.836636 | C          | 11.685000 | 3.529000  | 23.460000 |
| C | 29.553236 | 9.558112  | 43.952943 | C          | 11.215000 | 4.638000  | 24.154000 |
| C | 28.277752 | 10.139703 | 44.139612 | O          | 10.782000 | 2.793000  | 22.654000 |
| C | 27.618403 | 10.044646 | 45.364646 | Cu         | 18.542489 | 6.090441  | 26.011393 |
| C | 28.203052 | 9.370033  | 46.445213 | Cu         | 17.948983 | 3.703203  | 26.529401 |
| C | 29.460960 | 8.786187  | 46.266366 | C          | 22.209936 | 3.953991  | 26.377926 |
| C | 30.133145 | 8.871427  | 45.043599 | C          | 22.754241 | 3.198747  | 27.432181 |
| N | 30.167670 | 9.637581  | 42.711270 | C          | 24.107176 | 2.884661  | 27.459556 |
| H | 32.340305 | 10.520713 | 44.062654 | C          | 24.939881 | 3.313469  | 26.431258 |
| H | 31.717145 | 8.304799  | 42.998534 | C          | 24.432304 | 4.045895  | 25.340796 |
| H | 30.993409 | 8.290254  | 40.636370 | C          | 23.046791 | 4.353227  | 25.298408 |
| H | 33.293131 | 12.305449 | 42.544441 | C          | 22.530200 | 5.017414  | 24.164986 |
| H | 31.564508 | 12.064499 | 42.247204 | C          | 23.374096 | 5.409069  | 23.130651 |
| H | 32.789126 | 12.191874 | 40.068750 | C          | 24.740966 | 5.152367  | 23.192214 |
| H | 33.872044 | 10.892442 | 40.570247 | C          | 25.280915 | 4.460414  | 24.284741 |
| H | 30.831301 | 10.674254 | 40.085680 | O          | 25.573181 | 5.550254  | 22.151717 |
|   |           |           |           | O          | 20.432553 | 5.524159  | 26.187839 |

|   |           |          |           |    |           |          |           |
|---|-----------|----------|-----------|----|-----------|----------|-----------|
| O | 19.910158 | 3.378551 | 26.652619 | C  | 15.671708 | 4.769608 | 30.319163 |
| C | 20.765467 | 4.306683 | 26.417606 | C  | 14.560078 | 4.373702 | 31.056635 |
| C | 18.226927 | 4.022014 | 22.293999 | O  | 18.429051 | 6.413199 | 27.970193 |
| C | 18.992915 | 2.941012 | 21.873981 | O  | 17.895752 | 4.269125 | 28.429535 |
| C | 19.081890 | 2.638017 | 20.519979 | C  | 18.093675 | 5.484798 | 28.790219 |
| C | 18.404876 | 3.417023 | 19.587993 | Cu | 34.101812 | 5.994956 | 26.096746 |
| C | 17.639888 | 4.497024 | 20.008011 | Cu | 33.544049 | 3.588365 | 26.547293 |
| C | 17.550913 | 4.800019 | 21.362013 | C  | 37.803430 | 3.879693 | 26.437862 |
| C | 16.783924 | 5.881020 | 21.784030 | C  | 38.326396 | 3.143586 | 27.516755 |
| C | 16.107910 | 6.659026 | 20.850045 | C  | 39.675336 | 2.816896 | 27.571862 |
| C | 16.197885 | 6.355031 | 19.497042 | C  | 40.526631 | 3.210161 | 26.545234 |
| C | 16.963875 | 5.274030 | 19.076025 | C  | 40.043089 | 3.923390 | 25.432042 |
| O | 15.523872 | 7.185037 | 18.539057 | C  | 38.661664 | 4.251247 | 25.365627 |
| O | 18.565909 | 5.530300 | 24.109626 | C  | 38.170426 | 4.906199 | 24.217186 |
| O | 18.021477 | 3.390330 | 24.574839 | C  | 39.033058 | 5.256828 | 23.182824 |
| C | 18.264822 | 4.337135 | 23.745116 | C  | 40.394803 | 4.973480 | 23.263329 |
| C | 14.301000 | 5.801000 | 25.782000 | C  | 40.912459 | 4.299301 | 24.378048 |
| C | 13.829000 | 6.909000 | 26.476000 | O  | 41.244417 | 5.332073 | 22.222570 |
| C | 27.940031 | 7.023154 | 26.480546 | O  | 36.008162 | 5.439401 | 26.226182 |
| C | 27.104388 | 6.180132 | 25.756631 | O  | 35.506912 | 3.282115 | 26.656703 |
| C | 27.614102 | 5.059718 | 25.068104 | C  | 36.354217 | 4.222259 | 26.444855 |
| C | 29.007940 | 4.792152 | 25.126713 | C  | 33.846854 | 4.021972 | 22.293718 |
| C | 13.900000 | 3.935000 | 24.313000 | C  | 34.612831 | 2.940969 | 21.873683 |
| C | 28.681694 | 2.907221 | 23.630635 | C  | 34.701781 | 2.637978 | 20.519678 |
| C | 27.315263 | 3.128421 | 23.602675 | C  | 34.024753 | 3.416989 | 19.587708 |
| C | 26.756805 | 4.209193 | 24.321587 | C  | 33.259776 | 4.496991 | 20.007741 |
| O | 26.547769 | 2.232703 | 22.861077 | C  | 33.170826 | 4.799983 | 21.361747 |
| O | 16.595289 | 6.405520 | 25.844525 | C  | 32.403848 | 5.880986 | 21.783781 |
| O | 16.055322 | 4.267063 | 26.319455 | C  | 31.727821 | 6.658997 | 20.849810 |
| C | 15.735694 | 5.463901 | 25.982301 | C  | 31.817771 | 6.355005 | 19.496805 |
| C | 17.903687 | 5.836764 | 30.222573 | C  | 32.583748 | 5.274002 | 19.075771 |
| C | 18.895309 | 6.596463 | 30.869353 | O  | 31.143743 | 7.185016 | 18.538835 |
| C | 16.746559 | 5.435277 | 30.946448 | O  | 34.110742 | 5.499733 | 24.166543 |

|    |           |          |           |   |           |          |           |
|----|-----------|----------|-----------|---|-----------|----------|-----------|
| O  | 33.617778 | 3.337709 | 24.571828 | C | 54.557834 | 5.591815 | 23.007897 |
| C  | 33.848146 | 4.308740 | 23.763354 | C | 55.929834 | 5.377800 | 23.052821 |
| C  | 29.847843 | 5.626960 | 25.914436 | C | 56.515889 | 4.858782 | 24.200784 |
| C  | 29.298765 | 6.750167 | 26.558825 | O | 56.643771 | 5.617805 | 21.841785 |
| C  | 43.546871 | 6.897441 | 26.555740 | O | 51.637873 | 5.838601 | 26.120489 |
| C  | 42.719596 | 6.030196 | 25.853344 | O | 51.334198 | 3.662864 | 26.636587 |
| C  | 43.240871 | 4.906511 | 25.179385 | C | 52.092875 | 4.667858 | 26.380321 |
| C  | 44.640424 | 4.657970 | 25.234092 | C | 49.466779 | 4.021876 | 22.293156 |
| C  | 29.528387 | 3.721925 | 24.371182 | C | 50.232745 | 2.940872 | 21.873104 |
| C  | 44.324096 | 2.728177 | 23.795854 | C | 50.321669 | 2.637885 | 20.519096 |
| C  | 42.956171 | 2.945146 | 23.753777 | C | 49.644627 | 3.416901 | 19.587140 |
| C  | 42.388937 | 4.039265 | 24.445210 | C | 48.879661 | 4.496905 | 20.007192 |
| O  | 42.196081 | 2.032442 | 23.025524 | C | 48.790737 | 4.799893 | 21.361200 |
| O  | 32.137056 | 6.298259 | 25.982336 | C | 48.023772 | 5.880897 | 21.783251 |
| O  | 31.644393 | 4.133224 | 26.377521 | C | 47.347731 | 6.658913 | 20.849295 |
| C  | 31.295180 | 5.336538 | 26.100748 | C | 47.437655 | 6.354926 | 19.496287 |
| C  | 33.565027 | 5.597002 | 30.325498 | C | 48.203620 | 5.273922 | 19.075235 |
| C  | 34.604210 | 6.293020 | 30.969366 | O | 46.763613 | 7.184943 | 18.538331 |
| C  | 32.409482 | 5.226695 | 31.071371 | O | 49.732220 | 5.591592 | 24.087884 |
| C  | 31.298531 | 4.613828 | 30.456743 | O | 49.385118 | 3.426875 | 24.608984 |
| C  | 30.175429 | 4.278084 | 31.207597 | C | 49.525607 | 4.368998 | 23.749368 |
| O  | 34.020514 | 6.247716 | 28.073548 | C | 45.477844 | 5.536449 | 25.975946 |
| O  | 33.493269 | 4.090868 | 28.472536 | C | 44.911858 | 6.656628 | 26.612241 |
| C  | 33.704409 | 5.292709 | 28.871732 | C | 45.166997 | 3.567899 | 24.514081 |
| Cu | 49.695914 | 6.207882 | 25.979662 | O | 47.715487 | 6.339909 | 25.881134 |
| Cu | 49.344038 | 3.791403 | 26.564608 | O | 47.393981 | 4.173323 | 26.418891 |
| C  | 53.571003 | 4.464792 | 26.367939 | C | 46.948655 | 5.333487 | 26.093602 |
| C  | 54.157058 | 3.947774 | 27.515902 | C | 49.212283 | 6.003903 | 30.214069 |
| C  | 55.530059 | 3.732759 | 27.559826 | C | 50.162866 | 6.845375 | 30.819863 |
| C  | 56.316002 | 4.036762 | 26.454787 | C | 48.102101 | 5.542001 | 30.974387 |
| C  | 55.729946 | 4.554780 | 25.305823 | C | 47.067414 | 4.781737 | 30.389069 |
| C  | 54.356947 | 4.768795 | 25.262899 | C | 45.997191 | 4.336608 | 31.158800 |
| C  | 53.770890 | 5.287813 | 24.113936 | O | 49.608597 | 6.571690 | 27.933050 |

|    |           |          |           |   |           |          |           |
|----|-----------|----------|-----------|---|-----------|----------|-----------|
| O  | 49.297558 | 4.398529 | 28.455261 | C | 14.585642 | 6.801769 | 36.438090 |
| C  | 49.390593 | 5.635982 | 28.783666 | C | 14.640524 | 6.585855 | 35.071283 |
| C  | 11.158286 | 7.260970 | 41.959133 | C | 15.431604 | 5.536966 | 34.550129 |
| C  | 10.287269 | 6.502976 | 41.186145 | O | 13.913205 | 7.460290 | 34.266653 |
| C  | 10.757253 | 5.394976 | 40.491133 | O | 17.237310 | 5.643124 | 39.551841 |
| C  | 12.099253 | 5.042971 | 40.571108 | O | 16.775746 | 3.481073 | 40.001595 |
| C  | 11.698221 | 3.178978 | 39.103109 | C | 16.976813 | 4.443460 | 39.177198 |
| C  | 10.356221 | 3.528983 | 39.024134 | C | 12.972270 | 5.800966 | 41.346096 |
| C  | 9.886237  | 4.637982 | 39.718146 | C | 12.500286 | 6.908965 | 42.040108 |
| O  | 9.453204  | 2.792989 | 38.218147 | C | 26.889203 | 7.471702 | 41.839265 |
| Cu | 17.234486 | 6.183516 | 41.461713 | C | 26.022869 | 6.574174 | 41.248669 |
| Cu | 16.711703 | 3.780013 | 41.967112 | C | 26.477207 | 5.338387 | 40.684423 |
| C  | 20.977846 | 4.154223 | 41.878940 | C | 27.884084 | 5.043046 | 40.786531 |
| C  | 21.486363 | 3.428541 | 42.971886 | C | 12.571237 | 3.934972 | 39.877096 |
| C  | 22.843318 | 3.150814 | 43.077915 | C | 27.527149 | 2.985562 | 39.541087 |
| C  | 23.719493 | 3.580437 | 42.087623 | C | 26.133521 | 3.250849 | 39.461532 |
| C  | 23.254768 | 4.279809 | 40.959055 | C | 25.600210 | 4.407367 | 40.024109 |
| C  | 21.865641 | 4.563867 | 40.843079 | O | 25.438977 | 2.276206 | 38.802658 |
| C  | 21.398766 | 5.211088 | 39.680586 | O | 15.266926 | 6.452940 | 41.345636 |
| C  | 22.290170 | 5.591841 | 38.680877 | O | 14.792070 | 4.296265 | 41.797791 |
| C  | 23.654436 | 5.340566 | 38.806724 | C | 14.429415 | 5.491693 | 41.496921 |
| C  | 24.146129 | 4.679707 | 39.936654 | C | 16.715184 | 5.876816 | 45.691500 |
| O  | 24.528480 | 5.715929 | 37.794586 | C | 17.716010 | 6.652515 | 46.305067 |
| O  | 19.150183 | 5.666212 | 41.598392 | C | 18.785205 | 6.913336 | 32.216895 |
| O  | 18.685388 | 3.510400 | 42.072389 | C | 17.680910 | 6.480523 | 32.942396 |
| C  | 19.518258 | 4.462012 | 41.847875 | C | 16.650627 | 5.741014 | 32.329501 |
| C  | 16.896518 | 4.159821 | 37.720520 | C | 15.593573 | 5.452168 | 46.458109 |
| C  | 17.608147 | 3.061033 | 37.207177 | C | 14.513927 | 4.758156 | 45.872068 |
| C  | 17.612724 | 2.789326 | 35.845981 | C | 13.434050 | 4.348429 | 46.648325 |
| C  | 16.906106 | 3.609447 | 34.973399 | C | 14.488448 | 4.623043 | 32.424710 |
| C  | 16.154803 | 4.705951 | 35.446009 | C | 15.521340 | 5.314994 | 33.071390 |
| C  | 16.128290 | 4.970377 | 36.840883 | O | 13.373938 | 4.217789 | 33.150524 |
| C  | 15.311481 | 6.013465 | 37.321865 | O | 17.156121 | 6.484008 | 43.427603 |

|    |           |          |           |    |           |          |           |
|----|-----------|----------|-----------|----|-----------|----------|-----------|
| O  | 16.670476 | 4.327372 | 43.876805 | C  | 28.268125 | 7.185038 | 41.922324 |
| C  | 16.859092 | 5.541902 | 44.247238 | C  | 42.280844 | 7.191460 | 42.230225 |
| Cu | 32.993527 | 6.313271 | 41.497810 | C  | 41.441089 | 6.394531 | 41.460450 |
| Cu | 32.367934 | 3.867838 | 42.153405 | C  | 41.950639 | 5.341658 | 40.677076 |
| C  | 36.531303 | 3.892434 | 41.899917 | C  | 43.350019 | 5.087124 | 40.690011 |
| C  | 37.066875 | 3.090784 | 42.888937 | C  | 28.375682 | 3.846416 | 40.187162 |
| C  | 38.459277 | 2.859699 | 42.931537 | C  | 43.008733 | 3.310470 | 39.073237 |
| C  | 39.289552 | 3.406207 | 41.976927 | C  | 41.640070 | 3.524848 | 39.079890 |
| C  | 38.780967 | 4.213224 | 40.907179 | C  | 41.090768 | 4.547273 | 39.879629 |
| C  | 37.361263 | 4.457548 | 40.874505 | O  | 40.864387 | 2.682039 | 38.288349 |
| C  | 36.830823 | 5.230811 | 39.801624 | O  | 31.024890 | 6.605324 | 41.323049 |
| C  | 37.654876 | 5.758187 | 38.835245 | O  | 30.516761 | 4.549232 | 42.081732 |
| C  | 39.059900 | 5.544568 | 38.872871 | C  | 30.204313 | 5.689086 | 41.621997 |
| C  | 39.625706 | 4.771812 | 39.886371 | C  | 32.359015 | 6.200094 | 45.684619 |
| O  | 39.853569 | 6.087869 | 37.908033 | C  | 33.223212 | 7.108005 | 46.269677 |
| O  | 34.764309 | 5.431799 | 41.821541 | C  | 34.537734 | 6.583045 | 32.326419 |
| O  | 34.250895 | 3.277443 | 42.172869 | C  | 33.426750 | 6.193783 | 33.066622 |
| C  | 35.073698 | 4.214431 | 41.965621 | C  | 32.350073 | 5.518642 | 32.462671 |
| C  | 32.491805 | 3.998790 | 37.925216 | C  | 31.289995 | 5.608313 | 46.437991 |
| C  | 33.160053 | 2.870156 | 37.487096 | C  | 30.312368 | 4.763540 | 45.838279 |
| C  | 33.201305 | 2.575806 | 36.106877 | C  | 29.290839 | 4.226650 | 46.583927 |
| C  | 32.564685 | 3.393362 | 35.195494 | C  | 30.128896 | 4.532602 | 32.575969 |
| C  | 31.824199 | 4.551486 | 35.600887 | C  | 31.207733 | 5.153905 | 33.214484 |
| C  | 31.785404 | 4.844708 | 37.010665 | O  | 28.990745 | 4.212131 | 33.304709 |
| C  | 30.998470 | 5.944254 | 37.458054 | O  | 32.842135 | 6.749015 | 43.430813 |
| C  | 30.303614 | 6.718940 | 36.566256 | O  | 32.526040 | 4.586364 | 43.976596 |
| C  | 30.368253 | 6.466134 | 35.169388 | C  | 32.587723 | 5.820894 | 44.254726 |
| C  | 31.123379 | 5.404972 | 34.674740 | Cu | 48.443031 | 6.400560 | 41.595456 |
| O  | 29.646199 | 7.361256 | 34.432171 | Cu | 47.995076 | 3.973161 | 42.062418 |
| O  | 32.974124 | 5.506529 | 39.667444 | C  | 52.242278 | 4.464620 | 41.931334 |
| O  | 32.256156 | 3.444773 | 40.216254 | C  | 52.828353 | 3.947597 | 43.079285 |
| C  | 32.570005 | 4.340736 | 39.380041 | C  | 54.201353 | 3.732577 | 43.123183 |
| C  | 28.750404 | 5.981905 | 41.435654 | C  | 54.987278 | 4.036581 | 42.018131 |

|   |           |          |           |    |           |          |           |
|---|-----------|----------|-----------|----|-----------|----------|-----------|
| C | 54.401203 | 4.554604 | 40.869180 | C  | 49.000726 | 6.703642 | 32.922094 |
| C | 53.028203 | 4.768624 | 40.826281 | C  | 48.010014 | 5.882485 | 32.350216 |
| C | 52.442128 | 5.287648 | 39.677330 | C  | 46.742147 | 5.603403 | 46.532109 |
| C | 53.229054 | 5.591652 | 38.571278 | C  | 45.684412 | 4.908925 | 45.907868 |
| C | 54.601054 | 5.377632 | 38.616177 | C  | 44.581134 | 4.492842 | 46.646504 |
| C | 55.187129 | 4.858609 | 39.764128 | C  | 45.928081 | 4.629411 | 32.518494 |
| O | 55.314970 | 5.617639 | 37.405129 | C  | 46.922077 | 5.409646 | 33.124808 |
| O | 50.369997 | 5.931371 | 41.729629 | O  | 44.855009 | 4.174380 | 33.276551 |
| O | 49.972762 | 3.756529 | 42.182641 | O  | 48.353896 | 6.672377 | 43.560980 |
| C | 50.774090 | 4.733795 | 41.958234 | O  | 47.916331 | 4.498409 | 43.978493 |
| C | 48.264578 | 4.402013 | 37.822443 | C  | 48.069327 | 5.713674 | 44.364155 |
| C | 49.047844 | 3.339242 | 37.337588 | C  | 9.830848  | 7.260896 | 57.522290 |
| C | 49.113117 | 3.063828 | 35.978961 | C  | 8.959816  | 6.502907 | 56.749315 |
| C | 48.392874 | 3.840981 | 35.079198 | C  | 9.429783  | 5.394908 | 56.054291 |
| C | 47.573717 | 4.901254 | 35.520098 | C  | 10.771783 | 5.042898 | 56.134241 |
| C | 47.495661 | 5.177319 | 36.911832 | C  | 10.370718 | 3.178911 | 54.666243 |
| C | 46.626504 | 6.192863 | 37.357810 | C  | 9.028718  | 3.528920 | 54.587293 |
| C | 45.893626 | 6.940820 | 36.444984 | C  | 8.558750  | 4.637919 | 55.281317 |
| C | 45.986449 | 6.705323 | 35.083235 | O  | 8.125684  | 2.792932 | 53.781319 |
| C | 46.829954 | 5.681500 | 34.595847 | Cu | 15.894838 | 6.137623 | 57.134966 |
| O | 45.239001 | 7.533723 | 34.248724 | Cu | 15.340878 | 3.724064 | 57.551119 |
| O | 48.469703 | 5.887107 | 39.675845 | C  | 19.594526 | 4.036739 | 57.442878 |
| O | 48.095190 | 3.702423 | 40.094143 | C  | 20.144684 | 3.274484 | 58.489010 |
| C | 48.275461 | 4.680521 | 39.283358 | C  | 21.496818 | 2.956371 | 58.504619 |
| C | 44.199287 | 5.881042 | 41.509580 | C  | 22.322430 | 3.385823 | 57.471041 |
| C | 43.645966 | 6.940503 | 42.251381 | C  | 21.809225 | 4.127019 | 56.389205 |
| C | 43.864896 | 4.073499 | 39.859401 | C  | 20.424967 | 4.443380 | 56.361707 |
| O | 46.466730 | 6.618204 | 41.491902 | C  | 19.902572 | 5.122952 | 55.240682 |
| O | 46.064041 | 4.433028 | 41.879608 | C  | 20.738705 | 5.511987 | 54.198889 |
| C | 45.662962 | 5.626854 | 41.627437 | C  | 22.104116 | 5.242156 | 54.243627 |
| C | 47.886806 | 6.033299 | 45.805300 | C  | 22.651024 | 4.541891 | 55.327615 |
| C | 48.864386 | 6.811793 | 46.451673 | O  | 22.928289 | 5.638701 | 53.196429 |
| C | 50.059567 | 7.188420 | 32.161939 | O  | 17.796575 | 5.593068 | 57.302024 |



|   |           |          |           |    |           |          |           |
|---|-----------|----------|-----------|----|-----------|----------|-----------|
| O | 17.303516 | 3.422037 | 57.671567 | C  | 16.575750 | 6.521375 | 48.419241 |
| C | 18.146143 | 4.371580 | 57.484561 | C  | 15.536484 | 5.766577 | 47.842843 |
| C | 15.684590 | 4.216711 | 53.321974 | C  | 14.198081 | 5.242825 | 62.095148 |
| C | 16.402237 | 3.110261 | 52.832899 | C  | 13.166040 | 4.552842 | 61.469196 |
| C | 16.463731 | 2.844646 | 51.472079 | C  | 12.083075 | 4.099846 | 62.213249 |
| C | 15.802164 | 3.673700 | 50.573645 | C  | 13.395778 | 4.617848 | 48.014204 |
| C | 15.047551 | 4.779159 | 51.017682 | C  | 14.433262 | 5.338045 | 48.621761 |
| C | 14.977145 | 5.049328 | 52.411576 | O  | 12.308763 | 4.204486 | 48.776526 |
| C | 14.173156 | 6.116495 | 52.859086 | O  | 15.759213 | 6.378082 | 59.108506 |
| C | 13.497573 | 6.917330 | 51.946809 | O  | 15.277744 | 4.206113 | 59.477145 |
| C | 13.581823 | 6.683748 | 50.584180 | C  | 15.446347 | 5.409689 | 59.892097 |
| C | 14.358654 | 5.609528 | 50.094476 | Cu | 31.469262 | 6.139595 | 57.128713 |
| O | 12.889993 | 7.560938 | 49.751502 | Cu | 30.966457 | 3.715605 | 57.549419 |
| O | 15.949942 | 5.656286 | 55.206680 | C  | 35.210087 | 4.086115 | 57.448602 |
| O | 15.438962 | 3.490811 | 55.578075 | C  | 35.752493 | 3.357802 | 58.523215 |
| C | 15.689571 | 4.470684 | 54.788237 | C  | 37.099567 | 3.021262 | 58.550200 |
| C | 11.644816 | 5.800887 | 56.909216 | C  | 37.928719 | 3.396574 | 57.499307 |
| C | 11.172849 | 6.908886 | 57.603240 | C  | 37.425587 | 4.107201 | 56.392518 |
| C | 25.309153 | 7.062557 | 57.569391 | C  | 36.046016 | 4.445894 | 56.355750 |
| C | 24.474865 | 6.232212 | 56.830398 | C  | 35.533376 | 5.098183 | 55.215157 |
| C | 24.986609 | 5.129018 | 56.116118 | C  | 36.374154 | 5.434689 | 54.158642 |
| C | 26.382494 | 4.866310 | 56.163064 | C  | 37.735236 | 5.142136 | 54.210020 |
| C | 11.243751 | 3.934900 | 55.440217 | C  | 38.273849 | 4.471292 | 55.317126 |
| C | 26.055761 | 3.008228 | 54.634461 | O  | 38.563445 | 5.488283 | 53.148457 |
| C | 24.688485 | 3.227550 | 54.612726 | O  | 33.388382 | 5.621135 | 57.263899 |
| C | 24.128606 | 4.291801 | 55.355039 | O  | 32.930146 | 3.448618 | 57.667470 |
| O | 23.921255 | 2.343640 | 53.856810 | C  | 33.757608 | 4.407598 | 57.468119 |
| O | 13.939637 | 6.431860 | 56.972364 | C  | 31.301231 | 4.209927 | 53.312050 |
| O | 13.434970 | 4.270491 | 57.369038 | C  | 32.088663 | 3.148401 | 52.830796 |
| C | 13.091945 | 5.475275 | 57.084445 | C  | 32.197704 | 2.900113 | 51.468972 |
| C | 15.283046 | 5.695821 | 61.352095 | C  | 31.515271 | 3.701350 | 50.560425 |
| C | 16.314087 | 6.385804 | 61.978046 | C  | 30.686800 | 4.754475 | 50.995023 |
| C | 17.648832 | 6.967274 | 47.656058 | C  | 30.568157 | 5.007455 | 52.389679 |

|   |           |          |           |    |           |          |           |
|---|-----------|----------|-----------|----|-----------|----------|-----------|
| C | 29.695376 | 6.023569 | 52.824967 | O  | 31.365290 | 6.377315 | 59.104495 |
| C | 28.995125 | 6.789610 | 51.899675 | O  | 30.901996 | 4.202080 | 59.476863 |
| C | 29.126182 | 6.572930 | 50.537767 | C  | 31.064223 | 5.407574 | 59.890558 |
| C | 29.972391 | 5.550007 | 50.065760 | Cu | 47.052121 | 6.254635 | 57.152195 |
| O | 28.404944 | 7.410739 | 49.691352 | Cu | 46.686257 | 3.798129 | 57.530836 |
| O | 31.499085 | 5.663056 | 55.195826 | C  | 50.914829 | 4.464394 | 57.493750 |
| O | 31.065312 | 3.482003 | 55.572756 | C  | 51.500923 | 3.947364 | 58.641689 |
| C | 31.282208 | 4.467930 | 54.779609 | C  | 52.873923 | 3.732339 | 58.685563 |
| C | 27.223215 | 5.692949 | 56.958832 | C  | 53.659830 | 4.036343 | 57.580498 |
| C | 26.669796 | 6.797120 | 57.632137 | C  | 53.073736 | 4.554373 | 56.431559 |
| C | 40.911594 | 6.955273 | 57.617810 | C  | 51.700736 | 4.768398 | 56.388685 |
| C | 40.086238 | 6.134608 | 56.860580 | C  | 51.114643 | 5.287428 | 55.239746 |
| C | 40.605253 | 5.040672 | 56.137200 | C  | 51.901549 | 5.591433 | 54.133681 |
| C | 42.002802 | 4.780653 | 56.189193 | C  | 53.273549 | 5.377407 | 54.178555 |
| C | 26.903080 | 3.810651 | 55.388160 | C  | 53.859642 | 4.858378 | 55.326493 |
| C | 41.686055 | 2.933631 | 54.646474 | O  | 53.987445 | 5.617415 | 52.967495 |
| C | 40.318478 | 3.153974 | 54.614383 | O  | 48.992602 | 5.861248 | 57.303070 |
| C | 39.752000 | 4.212821 | 55.359929 | O  | 48.671867 | 3.656496 | 57.665545 |
| O | 39.557389 | 2.272907 | 53.849142 | C  | 49.437991 | 4.673548 | 57.497670 |
| O | 29.500177 | 6.400982 | 57.009195 | C  | 46.949082 | 4.379053 | 53.314108 |
| O | 29.053210 | 4.221076 | 57.376045 | C  | 47.753858 | 3.349559 | 52.794140 |
| C | 28.677851 | 5.421773 | 57.121266 | C  | 47.797427 | 3.098852 | 51.430299 |
| C | 30.903120 | 5.695641 | 61.351269 | C  | 47.035689 | 3.869547 | 50.560084 |
| C | 31.934175 | 6.385618 | 61.977205 | C  | 46.201077 | 4.902938 | 51.035594 |
| C | 33.105392 | 7.407231 | 47.645601 | C  | 46.141816 | 5.149995 | 52.433593 |
| C | 32.119149 | 6.820111 | 48.409660 | C  | 45.252764 | 6.131213 | 52.915345 |
| C | 31.165564 | 5.913144 | 47.841626 | C  | 44.485935 | 6.878797 | 52.030813 |
| C | 29.818167 | 5.242646 | 62.094340 | C  | 44.563501 | 6.676716 | 50.662792 |
| C | 28.786113 | 4.552669 | 61.468405 | C  | 45.425212 | 5.685650 | 50.139244 |
| C | 27.703159 | 4.099675 | 62.212476 | O  | 43.789442 | 7.511680 | 49.859823 |
| C | 29.187833 | 4.480966 | 47.977573 | O  | 47.123027 | 5.809564 | 55.215922 |
| C | 30.106396 | 5.318318 | 48.609067 | O  | 46.809322 | 3.601841 | 55.558258 |
| O | 28.179319 | 3.911965 | 48.695117 | C  | 46.960933 | 4.611902 | 54.782272 |

|   |           |          |           |   |           |          |           |
|---|-----------|----------|-----------|---|-----------|----------|-----------|
| C | 42.837880 | 5.608288 | 56.990013 | C | 46.419447 | 6.168363 | 64.088179 |
| C | 42.272515 | 6.696847 | 57.680285 | C | 45.387379 | 5.478391 | 63.463260 |
| C | 42.528996 | 3.731714 | 55.410448 | C | 43.271369 | 4.336426 | 63.580429 |
| O | 45.077976 | 6.404714 | 57.023445 | C | 44.303437 | 5.025398 | 64.205349 |
| O | 44.741487 | 4.198733 | 57.349791 | O | 42.183431 | 3.908432 | 64.359519 |
| C | 44.305120 | 5.385652 | 57.121738 | H | 12.119263 | 8.127158 | 26.935633 |
| C | 46.523195 | 5.695406 | 61.350162 | H | 10.573035 | 6.786858 | 25.566322 |
| C | 47.554262 | 6.385378 | 61.976082 | H | 13.383772 | 2.323346 | 22.982395 |
| C | 48.749426 | 7.127563 | 47.798885 | H | 9.847425  | 3.169682 | 22.676989 |
| C | 47.653422 | 6.675918 | 48.524874 | H | 22.119084 | 2.865283 | 28.244982 |
| C | 46.639535 | 5.911942 | 47.914646 | H | 24.514796 | 2.309379 | 28.285019 |
| C | 45.438253 | 5.242413 | 62.093251 | H | 25.988723 | 3.054757 | 26.486491 |
| C | 44.406185 | 4.552442 | 61.467332 | H | 21.472888 | 5.231817 | 24.052698 |
| C | 43.323243 | 4.099449 | 62.211421 | H | 22.954725 | 5.920898 | 22.275035 |
| C | 44.502917 | 4.746809 | 48.013534 | H | 19.532193 | 2.329631 | 22.589927 |
| C | 45.520323 | 5.463435 | 48.659085 | H | 19.679319 | 1.794064 | 20.190516 |
| O | 43.396929 | 4.320511 | 48.739998 | H | 18.480437 | 3.170779 | 18.536730 |
| O | 46.921441 | 6.445032 | 59.125165 | H | 16.650954 | 6.145170 | 22.827088 |
| O | 46.574134 | 4.240231 | 59.460379 | H | 15.506794 | 7.500910 | 21.165223 |
| C | 46.675449 | 5.444536 | 59.890888 | H | 14.495595 | 7.508486 | 27.087266 |
| C | 16.262162 | 6.620790 | 63.347051 | H | 27.529555 | 7.889405 | 26.989929 |
| C | 15.179196 | 6.168795 | 64.090104 | H | 26.051743 | 6.422994 | 25.723097 |
| C | 14.147156 | 5.478812 | 63.465153 | H | 14.941489 | 3.633928 | 24.311564 |
| C | 12.031150 | 4.336833 | 63.582254 | H | 29.088616 | 2.082604 | 23.060788 |
| C | 13.063191 | 5.025817 | 64.207206 | H | 19.766899 | 6.932289 | 30.319048 |
| O | 10.943187 | 3.908837 | 64.361307 | H | 15.665521 | 4.558172 | 29.255200 |
| C | 31.882275 | 6.620600 | 63.346211 | H | 13.750584 | 3.861985 | 30.553899 |
| C | 30.799322 | 6.168606 | 64.089282 | H | 15.671792 | 6.861068 | 17.596366 |
| C | 29.767267 | 5.478629 | 63.464346 | H | 25.077397 | 6.065255 | 21.439635 |
| C | 27.651260 | 4.336658 | 63.581482 | H | 25.566274 | 2.452096 | 22.871032 |
| C | 28.683314 | 5.025635 | 64.206417 | H | 37.676270 | 2.831166 | 28.326089 |
| O | 26.563309 | 3.908663 | 64.360554 | H | 40.064675 | 2.256271 | 28.416096 |
| C | 47.502389 | 6.620356 | 63.345091 | H | 41.571213 | 2.939372 | 26.620442 |

|                                |                                |
|--------------------------------|--------------------------------|
| H 37.118971 5.145534 24.096092 | H 46.913326 6.862029 17.595724 |
| H 38.632926 5.759662 22.312799 | H 56.056181 5.977208 21.104174 |
| H 35.146350 2.325571 22.590367 | H 10.791039 8.128353 42.498054 |
| H 35.297782 1.792980 20.190401 | H 9.244466 6.787143 41.129891  |
| H 34.099789 3.170466 18.536510 | H 12.055438 2.324805 38.544426 |
| H 32.268403 6.144979 22.826193 | H 8.519433 3.171396 38.239400  |
| H 31.125484 7.500008 21.165098 | H 20.818744 3.091133 43.756774 |
| H 29.934776 7.408622 27.139398 | H 23.220211 2.601750 43.935410 |
| H 43.126637 7.763877 27.056814 | H 24.770996 3.350023 42.205120 |
| H 41.663110 6.256029 25.827675 | H 20.345180 5.417166 39.519922 |
| H 30.589461 3.505419 24.325371 | H 21.907697 6.086038 37.797755 |
| H 44.735722 1.889393 23.250626 | H 18.172503 2.419400 37.874112 |
| H 35.478470 6.602811 30.407950 | H 18.171586 1.941252 35.462876 |
| H 31.273310 4.402779 29.392147 | H 16.935513 3.366502 33.920712 |
| H 29.332296 3.816071 30.711367 | H 15.208403 6.228662 38.379337 |
| H 31.291915 6.861001 17.596312 | H 13.965802 7.604192 36.815253 |
| H 40.765081 5.839575 21.494066 | H 13.169515 7.512834 42.643824 |
| H 41.213969 2.249738 23.025497 | H 26.504506 8.411614 42.247852 |
| H 53.552009 3.700243 28.381296 | H 24.959876 6.832776 41.206568 |
| H 55.987728 3.326159 28.455751 | H 13.611831 3.633372 39.869784 |
| H 57.384073 3.866331 26.497850 | H 27.899424 2.074060 39.066356 |
| H 52.703465 5.451666 24.014003 | H 18.562073 7.003766 45.725217 |
| H 54.081114 5.975869 22.116742 | H 19.562807 7.493141 32.704388 |
| H 50.777568 2.335091 22.589448 | H 17.629560 6.742319 33.990591 |
| H 50.920935 1.795289 20.189760 | H 14.479479 4.533737 44.811373 |
| H 49.720406 3.170974 18.535920 | H 12.620641 3.813822 46.176717 |
| H 47.862727 6.134593 22.823775 | H 12.717307 3.698696 32.586993 |
| H 46.741204 7.496805 21.164925 | H 13.972746 7.236298 33.288099 |
| H 45.542861 7.345897 27.161871 | H 24.064974 6.212363 37.047875 |
| H 46.229148 3.353372 24.482386 | H 24.492269 2.473016 38.727510 |
| H 50.996869 7.226199 30.241412 | H 36.406723 2.669978 43.651525 |
| H 47.061323 4.531556 29.333522 | H 38.881744 2.251634 43.737271 |
| H 45.217477 3.753344 30.687911 | H 40.364307 3.212954 42.045396 |

|                                |                                |
|--------------------------------|--------------------------------|
| H 35.757087 5.414834 39.739165 | H 49.725494 7.169777 45.898929 |
| H 37.225061 6.347528 38.015709 | H 50.806154 7.831408 32.617621 |
| H 33.668649 2.228989 38.212238 | H 48.952258 6.988287 33.964589 |
| H 33.746075 1.693000 35.757362 | H 45.685582 4.688954 44.845742 |
| H 32.623281 3.128476 34.135023 | H 43.783041 3.961428 46.145830 |
| H 30.935549 6.171049 38.523039 | H 44.223658 3.597334 32.741276 |
| H 29.680094 7.550975 36.903619 | H 45.342185 7.307317 33.274236 |
| H 28.960377 7.892602 42.386350 | H 54.726487 5.972739 36.666010 |
| H 41.870726 8.006702 42.817796 | H 9.463382 8.127045 58.062948  |
| H 40.383508 6.616678 41.470207 | H 7.916936 6.786691 56.693580  |
| H 29.439589 3.611160 40.233232 | H 10.728195 2.325373 54.106753 |
| H 43.411555 2.530874 38.439947 | H 7.191544 3.170264 53.803920  |
| H 34.012807 7.566198 45.670243 | H 19.513734 2.934921 59.302452 |
| H 35.352809 7.113520 32.808943 | H 21.908865 2.374545 59.323209 |
| H 33.407791 6.440151 34.120618 | H 23.370290 3.120993 57.515234 |
| H 30.360644 4.543863 44.771208 | H 18.846664 5.352422 55.145330 |
| H 28.542424 3.588006 46.099580 | H 20.314888 6.033047 53.351070 |
| H 28.301962 3.723833 32.750913 | H 16.925978 2.455460 53.520025 |
| H 29.621850 7.139693 33.488605 | H 17.028227 1.991010 51.110107 |
| H 39.308046 6.561518 37.259477 | H 15.872059 3.432733 49.522413 |
| H 39.875773 2.870099 38.353497 | H 14.042212 6.342322 53.911232 |
| H 52.223825 3.709908 43.947655 | H 12.888082 7.739013 52.298411 |
| H 54.659329 3.328124 44.019887 | H 11.840582 7.509217 58.212297 |
| H 56.055402 3.866610 42.061214 | H 24.896517 7.913942 58.101486 |
| H 51.374594 5.452980 39.579559 | H 23.421145 6.471024 56.807470 |
| H 52.752248 5.975798 37.680105 | H 12.285080 3.636295 55.426823 |
| H 49.621251 2.728581 38.025791 | H 26.463185 2.195876 54.047563 |
| H 49.727528 2.244244 35.619652 | H 17.168330 6.739337 61.410643 |
| H 48.468487 3.594119 34.029802 | H 18.434824 7.558233 48.116095 |
| H 46.488270 6.417340 38.409363 | H 16.556683 6.782938 49.468666 |
| H 45.232564 7.722153 36.795505 | H 13.128714 4.376221 60.400558 |
| H 44.284826 7.566899 42.863696 | H 11.277802 3.574511 61.719255 |
| H 44.927465 3.863505 39.794318 | H 11.644107 3.669477 48.238040 |

|   |           |          |           |   |           |          |           |
|---|-----------|----------|-----------|---|-----------|----------|-----------|
| H | 12.983948 | 7.334869 | 48.775932 | H | 48.424677 | 2.301621 | 51.044067 |
| H | 22.429696 | 6.160578 | 52.491325 | H | 47.091842 | 3.638149 | 49.506145 |
| H | 22.940033 | 2.563766 | 53.869352 | H | 45.125134 | 6.329409 | 53.973449 |
| H | 35.117096 | 3.052308 | 59.346676 | H | 43.810554 | 7.634747 | 52.408756 |
| H | 37.503815 | 2.462889 | 59.388747 | H | 42.901395 | 7.348135 | 58.276636 |
| H | 38.971463 | 3.113815 | 57.550375 | H | 43.590834 | 3.519011 | 55.365641 |
| H | 34.481970 | 5.347700 | 55.117842 | H | 48.405637 | 6.744723 | 61.407917 |
| H | 35.958029 | 5.934574 | 53.294375 | H | 49.514269 | 7.725447 | 48.284619 |
| H | 32.634846 | 2.519212 | 53.524434 | H | 47.595156 | 6.941754 | 49.571641 |
| H | 32.818312 | 2.083333 | 51.113582 | H | 44.381542 | 4.364289 | 60.399376 |
| H | 31.627238 | 3.477925 | 49.507578 | H | 42.519347 | 3.571640 | 61.717684 |
| H | 29.529791 | 6.232456 | 53.876693 | H | 42.744987 | 3.795251 | 48.176363 |
| H | 28.328061 | 7.569975 | 52.241874 | H | 43.867964 | 7.300086 | 48.880049 |
| H | 27.304770 | 7.447059 | 58.223420 | H | 53.398569 | 5.970644 | 52.227698 |
| H | 40.492863 | 7.798336 | 58.158316 | H | 17.068275 | 7.157983 | 63.836017 |
| H | 39.033101 | 6.374347 | 56.832026 | H | 15.148112 | 6.357241 | 65.155560 |
| H | 27.964461 | 3.596492 | 55.337621 | H | 10.263231 | 3.421680 | 63.797075 |
| H | 42.097577 | 2.125655 | 54.056462 | H | 32.688251 | 7.157999 | 63.835100 |
| H | 32.787981 | 6.739251 | 61.409320 | H | 30.768036 | 6.357172 | 65.154686 |
| H | 33.812253 | 8.104139 | 48.106727 | H | 25.881905 | 3.424183 | 63.795656 |
| H | 32.063202 | 7.066703 | 49.474619 | H | 48.307499 | 7.159164 | 63.833743 |
| H | 28.749233 | 4.375167 | 60.399856 | H | 46.387743 | 6.357335 | 65.153480 |
| H | 26.897727 | 3.574577 | 61.718385 | H | 41.501056 | 3.425548 | 63.794300 |
| H | 27.640314 | 3.350759 | 48.114412 | H | 54.922543 | 4.682786 | 55.325780 |
| H | 28.539331 | 7.201502 | 48.713741 | H | 56.250089 | 4.683169 | 39.763722 |
| H | 38.072710 | 5.994148 | 52.426111 | H | 57.578894 | 4.683426 | 24.200638 |
| H | 38.577046 | 2.496935 | 53.849799 | H | 32.654267 | 5.043331 | 18.026521 |
| H | 50.894863 | 3.700241 | 59.506315 | H | 17.034799 | 5.043580 | 18.026681 |
| H | 53.331562 | 3.325559 | 59.581312 | H | 10.176552 | 4.915318 | 24.089626 |
| H | 54.727844 | 3.865747 | 57.623131 | H | 8.847996  | 4.915605 | 39.653311 |
| H | 50.047590 | 5.459409 | 55.145353 | H | 7.520558  | 4.915552 | 55.216477 |
| H | 51.424876 | 5.977080 | 53.243044 | H | 12.998962 | 5.198993 | 65.269023 |
| H | 48.355033 | 2.740815 | 53.459902 | H | 28.618792 | 5.198981 | 65.268146 |

|   |           |           |           |             |           |           |           |
|---|-----------|-----------|-----------|-------------|-----------|-----------|-----------|
| H | 44.238616 | 5.198867  | 65.267017 |             |           |           |           |
| H | 48.274026 | 5.043188  | 18.026053 | (S,S)-1-TS1 |           |           |           |
| C | 34.329541 | 9.363119  | 40.775252 | C           | 35.450154 | 8.360430  | 42.171931 |
| C | 34.506673 | 8.580803  | 39.527143 | C           | 35.059571 | 8.300237  | 40.755465 |
| C | 33.427980 | 8.522027  | 38.470415 | C           | 35.660053 | 9.336453  | 39.817147 |
| C | 32.054559 | 8.950796  | 39.009650 | C           | 35.839394 | 10.702414 | 40.493575 |
| C | 32.150291 | 10.259707 | 39.802378 | C           | 36.627657 | 10.563595 | 41.804654 |
| C | 33.037485 | 10.111892 | 41.051537 | C           | 35.909730 | 9.639559  | 42.798898 |
| O | 34.214195 | 7.928242  | 40.769298 | O           | 33.817037 | 8.686376  | 41.312952 |
| C | 37.326828 | 7.272706  | 43.440611 | C           | 37.896830 | 7.066970  | 43.436333 |
| C | 38.635820 | 7.541192  | 43.891086 | C           | 38.992795 | 7.874251  | 43.786364 |
| C | 39.014899 | 7.254883  | 45.204199 | C           | 39.509464 | 7.837031  | 45.083810 |
| C | 38.100599 | 6.703190  | 46.109617 | C           | 38.930711 | 7.011163  | 46.054281 |
| C | 36.793995 | 6.445762  | 45.673562 | C           | 37.823633 | 6.224459  | 45.711593 |
| C | 36.407664 | 6.722554  | 44.360821 | C           | 37.304881 | 6.247032  | 44.415391 |
| N | 36.933192 | 7.577784  | 42.140036 | N           | 37.330983 | 7.143922  | 42.155753 |
| H | 33.379003 | 7.494766  | 38.069967 | H           | 35.007653 | 9.409680  | 38.928803 |
| H | 35.533663 | 8.380962  | 39.185903 | H           | 35.038669 | 7.296181  | 40.308466 |
| H | 35.231936 | 9.680915  | 41.314632 | H           | 35.100814 | 7.552608  | 42.811391 |
| H | 31.642283 | 8.158909  | 39.657865 | H           | 34.842988 | 11.130415 | 40.707523 |
| H | 31.355428 | 9.059019  | 38.163137 | H           | 36.353673 | 11.399317 | 39.807862 |
| H | 32.569253 | 11.050612 | 39.148070 | H           | 37.630779 | 10.146234 | 41.584126 |
| H | 31.144161 | 10.599763 | 40.104880 | H           | 36.793766 | 11.551350 | 42.269804 |
| H | 32.499108 | 9.551104  | 41.839458 | H           | 35.011423 | 10.133393 | 43.211859 |
| H | 33.277357 | 11.102834 | 41.475658 | H           | 36.551878 | 9.395862  | 43.664013 |
| H | 33.737521 | 9.188757  | 37.641611 | H           | 36.640152 | 8.951105  | 39.470456 |
| H | 39.353636 | 7.994013  | 43.199471 | H           | 39.433441 | 8.534585  | 43.031078 |
| H | 40.040292 | 7.471377  | 45.523882 | H           | 40.370159 | 8.464280  | 45.338908 |
| H | 38.400024 | 6.481634  | 47.138787 | H           | 39.336680 | 6.984509  | 47.070043 |
| H | 36.058768 | 6.018407  | 46.364230 | H           | 37.356283 | 5.578105  | 46.461428 |
| H | 35.389932 | 6.514058  | 44.022773 | H           | 36.443631 | 5.628385  | 44.147824 |
| H | 37.675375 | 7.528451  | 41.446223 | H           | 37.967525 | 7.409873  | 41.406589 |
| H | 36.095016 | 7.086098  | 41.824986 | H           | 36.737447 | 6.347100  | 41.893737 |

(S,S)-1-Int1

|    |           |          |           |    |           |          |           |
|----|-----------|----------|-----------|----|-----------|----------|-----------|
| C  | 12.487000 | 7.261000 | 26.395000 | C  | 16.107910 | 6.659026 | 20.850045 |
| C  | 11.616000 | 6.503000 | 25.622000 | C  | 16.197885 | 6.355031 | 19.497042 |
| C  | 12.086000 | 5.395000 | 24.927000 | C  | 16.963875 | 5.274030 | 19.076025 |
| C  | 13.428000 | 5.043000 | 25.007000 | O  | 15.523872 | 7.185037 | 18.539057 |
| C  | 13.027000 | 3.179000 | 23.539000 | O  | 18.565010 | 5.528780 | 24.114193 |
| C  | 11.685000 | 3.529000 | 23.460000 | O  | 18.021544 | 3.387367 | 24.573223 |
| C  | 11.215000 | 4.638000 | 24.154000 | C  | 18.264490 | 4.336136 | 23.746029 |
| O  | 10.782000 | 2.793000 | 22.654000 | C  | 14.301000 | 5.801000 | 25.782000 |
| Cu | 18.543313 | 6.082753 | 26.020038 | C  | 13.829000 | 6.909000 | 26.476000 |
| Cu | 17.949293 | 3.694182 | 26.528077 | C  | 27.971081 | 7.113769 | 26.432185 |
| C  | 22.215572 | 3.949606 | 26.388564 | C  | 27.132807 | 6.244118 | 25.743107 |
| C  | 22.754763 | 3.192570 | 27.444176 | C  | 27.641942 | 5.105818 | 25.084885 |
| C  | 24.109764 | 2.887700 | 27.483839 | C  | 29.037988 | 4.846027 | 25.141157 |
| C  | 24.950478 | 3.327116 | 26.466322 | C  | 13.900000 | 3.935000 | 24.313000 |
| C  | 24.449044 | 4.059435 | 25.373423 | C  | 28.708047 | 2.914495 | 23.706465 |
| C  | 23.061371 | 4.358361 | 25.318882 | C  | 27.340790 | 3.131533 | 23.678676 |
| C  | 22.551814 | 5.023172 | 24.182974 | C  | 26.782350 | 4.230544 | 24.369436 |
| C  | 23.402830 | 5.419502 | 23.156052 | O  | 26.572808 | 2.215923 | 22.962241 |
| C  | 24.770481 | 5.168377 | 23.228230 | O  | 16.596575 | 6.401564 | 25.853857 |
| C  | 25.305335 | 4.479947 | 24.325463 | O  | 16.054431 | 4.261740 | 26.318817 |
| O  | 25.608623 | 5.567350 | 22.192828 | C  | 15.735717 | 5.460517 | 25.985840 |
| O  | 20.434337 | 5.516178 | 26.192926 | C  | 17.910659 | 5.803242 | 30.236513 |
| O  | 19.912714 | 3.369151 | 26.650443 | C  | 18.900797 | 6.565457 | 30.882665 |
| C  | 20.768572 | 4.298707 | 26.420434 | C  | 16.764509 | 5.382425 | 30.968168 |
| C  | 18.226927 | 4.022014 | 22.293999 | C  | 15.688894 | 4.715119 | 30.344085 |
| C  | 18.992915 | 2.941012 | 21.873981 | C  | 14.586716 | 4.303745 | 31.087448 |
| C  | 19.081890 | 2.638017 | 20.519979 | O  | 18.429524 | 6.395612 | 27.983170 |
| C  | 18.404876 | 3.417023 | 19.587993 | O  | 17.895618 | 4.249654 | 28.430929 |
| C  | 17.639888 | 4.497024 | 20.008011 | C  | 18.094717 | 5.462657 | 28.799152 |
| C  | 17.550913 | 4.800019 | 21.362013 | Cu | 34.142416 | 6.085712 | 26.031431 |
| C  | 16.783924 | 5.881020 | 21.784030 | Cu | 33.584258 | 3.695575 | 26.562080 |
|    |           |          |           | C  | 37.837286 | 3.965240 | 26.416361 |
|    |           |          |           | C  | 38.357809 | 3.252534 | 27.512150 |



|   |           |          |           |    |           |          |           |
|---|-----------|----------|-----------|----|-----------|----------|-----------|
| C | 39.701712 | 2.907204 | 27.566479 | C  | 44.350460 | 2.716261 | 23.768637 |
| C | 40.549807 | 3.258264 | 26.522411 | C  | 42.983097 | 2.933405 | 23.714220 |
| C | 40.067895 | 3.948973 | 25.393953 | C  | 42.410279 | 4.027568 | 24.400895 |
| C | 38.691476 | 4.295131 | 25.328326 | O  | 42.229015 | 2.019014 | 22.981932 |
| C | 38.200905 | 4.926701 | 24.166477 | O  | 32.174120 | 6.385791 | 25.918424 |
| C | 39.060516 | 5.236732 | 23.116878 | O  | 31.684061 | 4.237110 | 26.396932 |
| C | 40.418656 | 4.937040 | 23.196157 | C  | 31.332233 | 5.429413 | 26.079731 |
| C | 40.934852 | 4.287023 | 24.325730 | C  | 33.678999 | 5.840046 | 30.271596 |
| O | 41.266210 | 5.256868 | 22.141237 | C  | 34.700549 | 6.629899 | 30.831710 |
| O | 36.048771 | 5.528692 | 26.168620 | C  | 32.569836 | 5.461697 | 31.081208 |
| O | 35.543361 | 3.385103 | 26.659960 | C  | 31.480873 | 4.736490 | 30.555269 |
| C | 36.391549 | 4.316457 | 26.419272 | C  | 30.408458 | 4.387009 | 31.370592 |
| C | 33.846854 | 4.021972 | 22.293718 | O  | 34.077613 | 6.404508 | 27.992525 |
| C | 34.612831 | 2.940969 | 21.873683 | O  | 33.564602 | 4.261409 | 28.472985 |
| C | 34.701781 | 2.637978 | 20.519678 | C  | 33.779762 | 5.477119 | 28.827977 |
| C | 34.024753 | 3.416989 | 19.587708 | Cu | 49.694256 | 6.200379 | 25.985316 |
| C | 33.259776 | 4.496991 | 20.007741 | Cu | 49.347196 | 3.781058 | 26.562257 |
| C | 33.170826 | 4.799983 | 21.361747 | C  | 53.571003 | 4.464792 | 26.367939 |
| C | 32.403848 | 5.880986 | 21.783781 | C  | 54.157058 | 3.947774 | 27.515902 |
| C | 31.727821 | 6.658997 | 20.849810 | C  | 55.530059 | 3.732759 | 27.559826 |
| C | 31.817771 | 6.355005 | 19.496805 | C  | 56.316002 | 4.036762 | 26.454787 |
| C | 32.583748 | 5.274002 | 19.075771 | C  | 55.729946 | 4.554780 | 25.305823 |
| O | 31.143743 | 7.185016 | 18.538835 | C  | 54.356947 | 4.768795 | 25.262899 |
| O | 34.142354 | 5.532485 | 24.124086 | C  | 53.770890 | 5.287813 | 24.113936 |
| O | 33.636235 | 3.385675 | 24.591319 | C  | 54.557834 | 5.591815 | 23.007897 |
| C | 33.867798 | 4.334089 | 23.756040 | C  | 55.929834 | 5.377800 | 23.052821 |
| C | 29.881702 | 5.710021 | 25.893817 | C  | 56.515889 | 4.858782 | 24.200784 |
| C | 29.332429 | 6.850872 | 26.505954 | O  | 56.643771 | 5.617805 | 21.841785 |
| C | 43.547593 | 6.881546 | 26.528832 | O  | 51.636349 | 5.835600 | 26.125881 |
| C | 42.727855 | 6.017862 | 25.813864 | O  | 51.337030 | 3.657236 | 26.634134 |
| C | 43.254998 | 4.893785 | 25.144241 | C  | 52.093309 | 4.664771 | 26.380821 |
| C | 44.653022 | 4.643761 | 25.213170 | C  | 49.466779 | 4.021876 | 22.293156 |
| C | 29.556697 | 3.753468 | 24.417181 | C  | 50.232745 | 2.940872 | 21.873104 |

|   |           |          |           |    |           |          |           |
|---|-----------|----------|-----------|----|-----------|----------|-----------|
| C | 50.321669 | 2.637885 | 20.519096 | O  | 9.453204  | 2.792989 | 38.218147 |
| C | 49.644627 | 3.416901 | 19.587140 | Cu | 17.247793 | 6.039840 | 41.498162 |
| C | 48.879661 | 4.496905 | 20.007192 | Cu | 16.630034 | 3.661040 | 42.014927 |
| C | 48.790737 | 4.799893 | 21.361200 | C  | 20.902283 | 3.861799 | 41.978767 |
| C | 48.023772 | 5.880897 | 21.783251 | C  | 21.372656 | 3.163944 | 43.106302 |
| C | 47.347731 | 6.658913 | 20.849295 | C  | 22.720855 | 2.858794 | 43.247262 |
| C | 47.437655 | 6.354926 | 19.496287 | C  | 23.625613 | 3.239842 | 42.262312 |
| C | 48.203620 | 5.273922 | 19.075235 | C  | 23.197307 | 3.910304 | 41.102285 |
| O | 46.763613 | 7.184943 | 18.538331 | C  | 21.815372 | 4.206311 | 40.943554 |
| O | 49.732436 | 5.589549 | 24.090983 | C  | 21.379950 | 4.808375 | 39.745879 |
| O | 49.389005 | 3.422900 | 24.606685 | C  | 22.296058 | 5.131739 | 38.748901 |
| C | 49.526635 | 4.367440 | 23.749514 | C  | 23.656483 | 4.887192 | 38.923114 |
| C | 45.482288 | 5.519969 | 25.965987 | C  | 24.119541 | 4.281961 | 40.096774 |
| C | 44.911063 | 6.638541 | 26.600162 | O  | 24.556743 | 5.217984 | 37.918508 |
| C | 45.186462 | 3.554769 | 24.496162 | O  | 19.140846 | 5.440629 | 41.649650 |
| O | 47.715858 | 6.328514 | 25.884275 | O  | 18.586337 | 3.309058 | 42.138628 |
| O | 47.397513 | 4.159869 | 26.416564 | C  | 19.457757 | 4.225208 | 41.917877 |
| C | 46.951327 | 5.319788 | 26.091800 | C  | 16.856633 | 4.018464 | 37.763002 |
| C | 49.185038 | 5.978034 | 30.217959 | C  | 17.540822 | 2.901440 | 37.252131 |
| C | 50.114979 | 6.835874 | 30.832656 | C  | 17.555746 | 2.638543 | 35.888855 |
| C | 48.080255 | 5.490273 | 30.970964 | C  | 16.885758 | 3.484944 | 35.011845 |
| C | 47.060614 | 4.716835 | 30.376299 | C  | 16.159584 | 4.598982 | 35.481773 |
| C | 45.997605 | 4.244000 | 31.139522 | C  | 16.124399 | 4.856646 | 36.878077 |
| O | 49.600784 | 6.556612 | 27.941212 | C  | 15.335069 | 5.922380 | 37.355231 |
| O | 49.296703 | 4.380423 | 28.454219 | C  | 14.640516 | 6.734354 | 36.467856 |
| C | 49.379885 | 5.617097 | 28.787332 | C  | 14.701375 | 6.521338 | 35.100840 |
| C | 11.158286 | 7.260970 | 41.959133 | C  | 15.468968 | 5.453806 | 34.582419 |
| C | 10.287269 | 6.502976 | 41.186145 | O  | 14.000181 | 7.414293 | 34.293285 |
| C | 10.757253 | 5.394976 | 40.491133 | O  | 17.238994 | 5.491009 | 39.592176 |
| C | 12.099253 | 5.042971 | 40.571108 | O  | 16.693977 | 3.349947 | 40.048148 |
| C | 11.698221 | 3.178978 | 39.103109 | C  | 16.936779 | 4.300737 | 39.220581 |
| C | 10.356221 | 3.528983 | 39.024134 | C  | 12.972270 | 5.800966 | 41.346096 |
| C | 9.886237  | 4.637982 | 39.718146 | C  | 12.500286 | 6.908965 | 42.040108 |

|    |           |          |           |   |           |          |           |
|----|-----------|----------|-----------|---|-----------|----------|-----------|
| C  | 26.417872 | 7.057925 | 42.510142 | C | 37.353577 | 4.115799 | 40.853414 |
| C  | 25.691432 | 6.136049 | 41.785749 | C | 36.847890 | 4.915911 | 39.787410 |
| C  | 26.317812 | 5.053334 | 41.086717 | C | 37.688145 | 5.460685 | 38.844667 |
| C  | 27.752091 | 4.937642 | 41.197015 | C | 39.090763 | 5.238343 | 38.903136 |
| C  | 12.571237 | 3.934972 | 39.877096 | C | 39.630472 | 4.424087 | 39.899630 |
| C  | 27.684349 | 2.981213 | 39.754036 | O | 39.906358 | 5.812387 | 37.978271 |
| C  | 26.273716 | 3.096578 | 39.622994 | O | 34.906462 | 5.314898 | 41.873850 |
| C  | 25.582699 | 4.111506 | 40.278585 | O | 34.160691 | 3.288968 | 42.337418 |
| O  | 25.727603 | 2.133591 | 38.821802 | C | 35.093187 | 4.070409 | 42.026893 |
| O  | 15.289708 | 6.388459 | 41.370650 | C | 32.684315 | 4.856234 | 38.076561 |
| O  | 14.737340 | 4.252603 | 41.833928 | C | 33.462008 | 3.762095 | 37.734678 |
| C  | 14.418649 | 5.457248 | 41.522039 | C | 33.603322 | 3.391119 | 36.381164 |
| C  | 16.691202 | 5.784177 | 45.723199 | C | 32.931893 | 4.082323 | 35.393822 |
| C  | 17.714283 | 6.530553 | 46.336531 | C | 32.086980 | 5.200409 | 35.691690 |
| C  | 18.802073 | 6.863834 | 32.235578 | C | 31.983230 | 5.602145 | 37.073568 |
| C  | 17.710150 | 6.410686 | 32.967776 | C | 31.139316 | 6.704167 | 37.399393 |
| C  | 16.679445 | 5.671326 | 32.356182 | C | 30.438299 | 7.364877 | 36.424936 |
| C  | 15.548386 | 5.409484 | 46.483898 | C | 30.531408 | 6.976828 | 35.061939 |
| C  | 14.448891 | 4.748929 | 45.895848 | C | 31.346445 | 5.913263 | 34.682064 |
| C  | 13.348901 | 4.386385 | 46.667075 | O | 29.767480 | 7.751312 | 34.233677 |
| C  | 14.524308 | 4.540505 | 32.458272 | O | 32.694136 | 6.413478 | 39.870164 |
| C  | 15.558348 | 5.232075 | 33.103225 | O | 32.451563 | 4.218562 | 40.321587 |
| O  | 13.416496 | 4.124824 | 33.188562 | C | 32.592052 | 5.205773 | 39.535098 |
| O  | 17.171417 | 6.355346 | 43.460116 | C | 28.478367 | 5.928623 | 41.934715 |
| O  | 16.599759 | 4.222188 | 43.920837 | C | 27.823490 | 6.973852 | 42.563767 |
| C  | 16.832919 | 5.431463 | 44.283733 | C | 42.237296 | 7.054609 | 42.055943 |
| Cu | 32.409605 | 7.542349 | 41.547181 | C | 41.412021 | 6.182474 | 41.355689 |
| Cu | 32.510394 | 4.476018 | 42.254568 | C | 41.940626 | 5.078630 | 40.658780 |
| C  | 36.500856 | 3.571809 | 41.874238 | C | 43.343542 | 4.847598 | 40.693537 |
| C  | 37.003144 | 2.696877 | 42.817128 | C | 28.403438 | 3.871817 | 40.508953 |
| C  | 38.383183 | 2.386550 | 42.829790 | C | 43.029410 | 2.937268 | 39.228579 |
| C  | 39.240859 | 2.953294 | 41.911443 | C | 41.658707 | 3.133029 | 39.214865 |
| C  | 38.765857 | 3.832912 | 40.883304 | C | 41.095094 | 4.210924 | 39.925213 |

|    |           |          |           |   |           |          |           |
|----|-----------|----------|-----------|---|-----------|----------|-----------|
| O  | 40.895894 | 2.222575 | 38.488948 | C | 50.771052 | 4.711570 | 41.952610 |
| O  | 30.536030 | 7.035300 | 41.746755 | C | 48.272578 | 4.321862 | 37.809817 |
| O  | 30.575304 | 4.864496 | 42.312709 | C | 49.083001 | 3.282280 | 37.320342 |
| C  | 29.976587 | 5.935184 | 41.997189 | C | 49.155352 | 3.015813 | 35.960135 |
| C  | 32.452064 | 6.703599 | 45.812734 | C | 48.413429 | 3.777291 | 35.064168 |
| C  | 33.291884 | 7.590044 | 46.459634 | C | 47.564331 | 4.811398 | 35.510429 |
| C  | 34.658043 | 7.017834 | 32.164064 | C | 47.480933 | 5.079184 | 36.903398 |
| C  | 33.586855 | 6.636919 | 32.963102 | C | 46.585547 | 6.069064 | 37.355196 |
| C  | 32.531581 | 5.863004 | 32.446097 | C | 45.827773 | 6.797829 | 36.447312 |
| C  | 31.385700 | 6.052630 | 46.516835 | C | 45.923113 | 6.569551 | 35.084452 |
| C  | 30.453053 | 5.199965 | 45.857881 | C | 46.796604 | 5.574087 | 34.590720 |
| C  | 29.418915 | 4.616915 | 46.548990 | O | 45.146965 | 7.377126 | 34.255817 |
| C  | 30.382281 | 4.755414 | 32.713129 | O | 48.458242 | 5.811615 | 39.658813 |
| C  | 31.429871 | 5.505407 | 33.258130 | O | 48.115037 | 3.623029 | 40.084238 |
| O  | 29.292256 | 4.418375 | 33.505156 | C | 48.282028 | 4.601279 | 39.270266 |
| O  | 32.776505 | 7.395443 | 43.568454 | C | 44.178728 | 5.719059 | 41.448290 |
| O  | 32.767334 | 5.189467 | 44.052964 | C | 43.605873 | 6.827811 | 42.098813 |
| C  | 32.676309 | 6.417839 | 44.354545 | C | 43.873796 | 3.778401 | 39.944891 |
| Cu | 48.410673 | 6.332330 | 41.574258 | O | 46.430581 | 6.507071 | 41.453536 |
| Cu | 48.009064 | 3.899165 | 42.052742 | O | 46.071319 | 4.319803 | 41.867524 |
| C  | 52.242278 | 4.464620 | 41.931334 | C | 45.646951 | 5.499702 | 41.591274 |
| C  | 52.828353 | 3.947597 | 43.079285 | C | 47.841777 | 5.977950 | 45.784806 |
| C  | 54.201353 | 3.732577 | 43.123183 | C | 48.779103 | 6.814194 | 46.419087 |
| C  | 54.987278 | 4.036581 | 42.018131 | C | 49.998943 | 7.168733 | 32.176288 |
| C  | 54.401203 | 4.554604 | 40.869180 | C | 48.948534 | 6.656013 | 32.929765 |
| C  | 53.028203 | 4.768624 | 40.826281 | C | 47.977315 | 5.817922 | 32.349201 |
| C  | 52.442128 | 5.287648 | 39.677330 | C | 46.720729 | 5.501196 | 46.520341 |
| C  | 53.229054 | 5.591652 | 38.571278 | C | 45.697293 | 4.746022 | 45.909174 |
| C  | 54.601054 | 5.377632 | 38.616177 | C | 44.620095 | 4.281737 | 46.657743 |
| C  | 55.187129 | 4.858609 | 39.764128 | C | 45.920782 | 4.521385 | 32.501923 |
| O  | 55.314970 | 5.617639 | 37.405129 | C | 46.897820 | 5.315700 | 33.117612 |
| O  | 50.346311 | 5.901869 | 41.722307 | O | 44.854615 | 4.039129 | 33.253055 |
| O  | 49.987315 | 3.720402 | 42.175800 | O | 48.301844 | 6.612958 | 43.537585 |

|    |           |          |           |   |           |          |           |
|----|-----------|----------|-----------|---|-----------|----------|-----------|
| O  | 47.918210 | 4.431446 | 43.966666 | C | 13.460260 | 6.927339 | 51.975551 |
| C  | 48.038337 | 5.652459 | 44.345868 | C | 13.532522 | 6.696888 | 50.611730 |
| C  | 9.830848  | 7.260896 | 57.522290 | C | 14.305332 | 5.623802 | 50.112996 |
| C  | 8.959816  | 6.502907 | 56.749315 | O | 12.835967 | 7.577962 | 49.787199 |
| C  | 9.429783  | 5.394908 | 56.054291 | O | 15.947200 | 5.669129 | 55.208249 |
| C  | 10.771783 | 5.042898 | 56.134241 | O | 15.443338 | 3.501516 | 55.577895 |
| C  | 10.370718 | 3.178911 | 54.666243 | C | 15.687421 | 4.483548 | 54.789220 |
| C  | 9.028718  | 3.528920 | 54.587293 | C | 11.644816 | 5.800887 | 56.909216 |
| C  | 8.558750  | 4.637919 | 55.281317 | C | 11.172849 | 6.908886 | 57.603240 |
| O  | 8.125684  | 2.792932 | 53.781319 | C | 25.312619 | 7.132058 | 57.579832 |
| Cu | 15.891856 | 6.148340 | 57.136744 | C | 24.477483 | 6.309376 | 56.832945 |
| Cu | 15.347389 | 3.731930 | 57.549592 | C | 24.989202 | 5.216538 | 56.103050 |
| C  | 19.601796 | 4.066243 | 57.426699 | C | 26.385630 | 4.955749 | 56.143204 |
| C  | 20.160064 | 3.292182 | 58.459788 | C | 11.243751 | 3.934900 | 55.440217 |
| C  | 21.514922 | 2.985253 | 58.468411 | C | 26.059142 | 3.119230 | 54.588797 |
| C  | 22.335648 | 3.438438 | 57.441076 | C | 24.691159 | 3.334872 | 54.574920 |
| C  | 21.814940 | 4.192520 | 56.371903 | C | 24.130801 | 4.387111 | 55.333933 |
| C  | 20.427751 | 4.496858 | 56.350740 | O | 23.923962 | 2.459510 | 53.809109 |
| C  | 19.898476 | 5.188657 | 55.240300 | O | 13.936931 | 6.435871 | 56.974496 |
| C  | 20.730502 | 5.603367 | 54.205144 | O | 13.438558 | 4.272548 | 57.368627 |
| C  | 22.098287 | 5.345662 | 54.244802 | C | 13.092169 | 5.476825 | 57.084755 |
| C  | 22.652072 | 4.631548 | 55.316136 | C | 15.283046 | 5.695821 | 61.352095 |
| O  | 22.918020 | 5.766502 | 53.203606 | C | 16.314087 | 6.385804 | 61.978046 |
| O  | 17.795118 | 5.612858 | 57.301856 | C | 17.646845 | 6.863940 | 47.682817 |
| O  | 17.313209 | 3.438603 | 57.666116 | C | 16.552011 | 6.465659 | 48.441202 |
| C  | 18.151157 | 4.392564 | 57.477866 | C | 15.491822 | 5.740343 | 47.864445 |
| C  | 15.670539 | 4.232127 | 53.323559 | C | 14.198081 | 5.242825 | 62.095148 |
| C  | 16.383992 | 3.126544 | 52.826708 | C | 13.166040 | 4.552842 | 61.469196 |
| C  | 16.426846 | 2.858652 | 51.465904 | C | 12.083075 | 4.099846 | 62.213249 |
| C  | 15.751854 | 3.685487 | 50.575745 | C | 13.311193 | 4.668292 | 48.030292 |
| C  | 15.003723 | 4.792355 | 51.028139 | C | 14.370079 | 5.355252 | 48.639510 |
| C  | 14.949456 | 5.062551 | 52.422309 | O | 12.205238 | 4.299852 | 48.788343 |
| C  | 14.147199 | 6.127002 | 52.879602 | O | 15.755322 | 6.384240 | 59.110422 |

|    |           |          |           |    |           |          |           |
|----|-----------|----------|-----------|----|-----------|----------|-----------|
| O  | 15.282758 | 4.209586 | 59.475875 | C  | 26.673622 | 6.866823 | 57.637532 |
| C  | 15.446265 | 5.413116 | 59.892235 | C  | 40.917790 | 6.942527 | 57.671533 |
| Cu | 31.474477 | 6.196029 | 57.141919 | C  | 40.089213 | 6.143638 | 56.894832 |
| Cu | 30.957745 | 3.768106 | 57.523219 | C  | 40.603648 | 5.063983 | 56.146894 |
| C  | 35.203303 | 4.116834 | 57.431134 | C  | 41.999636 | 4.795708 | 56.194242 |
| C  | 35.740446 | 3.363025 | 58.490666 | C  | 26.906678 | 3.913087 | 55.351229 |
| C  | 37.084951 | 3.016134 | 58.510665 | C  | 41.675746 | 2.984714 | 54.611338 |
| C  | 37.916895 | 3.406774 | 57.467664 | C  | 40.309411 | 3.213878 | 54.581388 |
| C  | 37.419323 | 4.144534 | 56.376253 | C  | 39.747507 | 4.258899 | 55.349539 |
| C  | 36.042212 | 4.493635 | 56.346183 | O  | 39.544636 | 2.355414 | 53.794410 |
| C  | 35.535034 | 5.174148 | 55.219718 | O  | 29.506716 | 6.469000 | 57.020881 |
| C  | 36.379643 | 5.530984 | 54.172969 | O  | 29.048141 | 4.286024 | 57.353831 |
| C  | 37.738897 | 5.229342 | 54.219577 | C  | 28.679340 | 5.492008 | 57.115163 |
| C  | 38.271157 | 4.527167 | 55.310112 | C  | 30.903120 | 5.695641 | 61.351269 |
| O  | 38.571568 | 5.600640 | 53.169895 | C  | 31.934175 | 6.385618 | 61.977205 |
| O  | 33.390608 | 5.665640 | 57.273225 | C  | 33.140830 | 7.821283 | 47.846331 |
| O  | 32.919884 | 3.489117 | 57.639449 | C  | 32.142328 | 7.190935 | 48.558633 |
| C  | 33.752779 | 4.446683 | 57.456630 | C  | 31.217838 | 6.295775 | 47.926934 |
| C  | 31.281377 | 4.340895 | 53.296866 | C  | 29.818167 | 5.242646 | 62.094340 |
| C  | 32.049633 | 3.280831 | 52.783120 | C  | 28.786113 | 4.552669 | 61.468405 |
| C  | 32.153138 | 3.073193 | 51.414155 | C  | 27.703159 | 4.099675 | 62.212476 |
| C  | 31.486606 | 3.916412 | 50.532005 | C  | 29.262448 | 4.825149 | 47.945482 |
| C  | 30.676128 | 4.969481 | 51.000359 | C  | 30.147417 | 5.651232 | 48.636355 |
| C  | 30.558945 | 5.177440 | 52.401633 | O  | 28.241230 | 4.214756 | 48.609032 |
| C  | 29.701861 | 6.192980 | 52.869774 | O  | 31.367184 | 6.403527 | 59.117480 |
| C  | 29.019530 | 7.004002 | 51.970155 | O  | 30.892672 | 4.225283 | 59.457952 |
| C  | 29.154365 | 6.834454 | 50.602083 | C  | 31.060072 | 5.424172 | 59.888446 |
| C  | 29.983606 | 5.813164 | 50.098086 | Cu | 47.050342 | 6.246866 | 57.149750 |
| O  | 28.458093 | 7.718937 | 49.782965 | Cu | 46.687901 | 3.790654 | 57.535721 |
| O  | 31.506761 | 5.750740 | 55.205323 | C  | 50.914829 | 4.464394 | 57.493750 |
| O  | 31.057018 | 3.566356 | 55.543348 | C  | 51.500923 | 3.947364 | 58.641689 |
| C  | 31.277433 | 4.565803 | 54.768452 | C  | 52.873923 | 3.732339 | 58.685563 |
| C  | 27.226437 | 5.770964 | 56.950562 | C  | 53.659830 | 4.036343 | 57.580498 |

|   |           |          |           |   |           |          |           |
|---|-----------|----------|-----------|---|-----------|----------|-----------|
| C | 53.073736 | 4.554373 | 56.431559 | C | 47.579351 | 6.646794 | 48.496130 |
| C | 51.700736 | 4.768398 | 56.388685 | C | 46.605282 | 5.823403 | 47.898986 |
| C | 51.114643 | 5.287428 | 55.239746 | C | 45.438253 | 5.242413 | 62.093251 |
| C | 51.901549 | 5.591433 | 54.133681 | C | 44.406185 | 4.552442 | 61.467332 |
| C | 53.273549 | 5.377407 | 54.178555 | C | 43.323243 | 4.099449 | 62.211421 |
| C | 53.859642 | 4.858378 | 55.326493 | C | 44.533238 | 4.549326 | 48.021624 |
| O | 53.987445 | 5.617415 | 52.967495 | C | 45.511967 | 5.329326 | 48.652760 |
| O | 48.990789 | 5.856815 | 57.297841 | O | 43.455100 | 4.072191 | 48.758212 |
| O | 48.673629 | 3.653369 | 57.671429 | O | 46.922579 | 6.441515 | 59.123191 |
| C | 49.437999 | 4.670857 | 57.497717 | O | 46.573857 | 4.237700 | 59.463220 |
| C | 46.974073 | 4.350968 | 53.319548 | C | 46.676038 | 5.442656 | 59.891221 |
| C | 47.817693 | 3.346721 | 52.811905 | C | 16.262162 | 6.620790 | 63.347051 |
| C | 47.875890 | 3.085944 | 51.450485 | C | 15.179196 | 6.168795 | 64.090104 |
| C | 47.088802 | 3.819776 | 50.570969 | C | 14.147156 | 5.478812 | 63.465153 |
| C | 46.214332 | 4.825193 | 51.034872 | C | 12.031150 | 4.336833 | 63.582254 |
| C | 46.143788 | 5.084933 | 52.429926 | C | 13.063191 | 5.025817 | 64.207206 |
| C | 45.221744 | 6.040531 | 52.900517 | O | 10.943187 | 3.908837 | 64.361307 |
| C | 44.426572 | 6.747561 | 52.007260 | C | 31.882275 | 6.620600 | 63.346211 |
| C | 44.511407 | 6.531423 | 50.641643 | C | 30.799322 | 6.168606 | 64.089282 |
| C | 45.409669 | 5.567216 | 50.129830 | C | 29.767267 | 5.478629 | 63.464346 |
| O | 43.706335 | 7.325726 | 49.827663 | C | 27.651260 | 4.336658 | 63.581482 |
| O | 47.118938 | 5.795327 | 55.213328 | C | 28.683314 | 5.025635 | 64.206417 |
| O | 46.815630 | 3.587267 | 55.565028 | O | 26.563309 | 3.908663 | 64.360554 |
| C | 46.968671 | 4.593813 | 54.785420 | C | 47.502389 | 6.620356 | 63.345091 |
| C | 42.837972 | 5.602703 | 57.011468 | C | 46.419447 | 6.168363 | 64.088179 |
| C | 42.277578 | 6.677161 | 57.727315 | C | 45.387379 | 5.478391 | 63.463260 |
| C | 42.521580 | 3.760065 | 55.395368 | C | 43.271369 | 4.336426 | 63.580429 |
| O | 45.077098 | 6.395714 | 57.026417 | C | 44.303437 | 5.025398 | 64.205349 |
| O | 44.741945 | 4.189234 | 57.352919 | O | 42.183431 | 3.908432 | 64.359519 |
| C | 44.304987 | 5.377088 | 57.130154 | H | 12.119255 | 8.127032 | 26.935827 |
| C | 46.523195 | 5.695406 | 61.350162 | H | 10.573025 | 6.786807 | 25.566429 |
| C | 47.554262 | 6.385378 | 61.976082 | H | 13.383809 | 2.323431 | 22.982298 |
| C | 48.649701 | 7.143285 | 47.761677 | H | 9.847419  | 3.169622 | 22.677189 |

|   |           |          |           |   |           |          |           |
|---|-----------|----------|-----------|---|-----------|----------|-----------|
| H | 22.114244 | 2.852353 | 28.249961 | H | 41.672614 | 6.247162 | 25.775772 |
| H | 24.512925 | 2.312189 | 28.311370 | H | 30.618050 | 3.538003 | 24.372540 |
| H | 26.000865 | 3.076813 | 26.531688 | H | 44.766881 | 1.877499 | 23.227048 |
| H | 21.494398 | 5.233085 | 24.062702 | H | 35.539348 | 6.944764 | 30.220981 |
| H | 22.988285 | 5.929893 | 22.297265 | H | 31.432599 | 4.440895 | 29.512545 |
| H | 19.532135 | 2.329568 | 22.589926 | H | 29.586292 | 3.827918 | 30.944204 |
| H | 19.679382 | 1.794107 | 20.190539 | H | 31.291768 | 6.860917 | 17.596353 |
| H | 18.480517 | 3.170833 | 18.536734 | H | 40.788656 | 5.750904 | 21.402367 |
| H | 16.651707 | 6.145323 | 22.827180 | H | 41.246845 | 2.235868 | 22.974599 |
| H | 15.506988 | 7.501042 | 21.165230 | H | 53.552068 | 3.699828 | 28.381225 |
| H | 14.495549 | 7.507996 | 27.087791 | H | 55.987722 | 3.325996 | 28.455671 |
| H | 27.560505 | 7.992844 | 26.918991 | H | 57.384067 | 3.866269 | 26.497799 |
| H | 26.078336 | 6.479576 | 25.712413 | H | 52.703430 | 5.452518 | 24.014951 |
| H | 14.941568 | 3.634326 | 24.310813 | H | 54.081133 | 5.976057 | 22.116810 |
| H | 29.114392 | 2.074846 | 23.158599 | H | 50.777677 | 2.334931 | 22.589244 |
| H | 19.763983 | 6.915804 | 30.328100 | H | 50.920884 | 1.795262 | 20.189740 |
| H | 15.673913 | 4.515713 | 29.277927 | H | 49.720339 | 3.170940 | 18.535919 |
| H | 13.776108 | 3.791969 | 30.586635 | H | 47.863628 | 6.134706 | 22.823907 |
| H | 15.672182 | 6.861297 | 17.596367 | H | 46.741250 | 7.496845 | 21.164903 |
| H | 25.115402 | 6.075975 | 21.474510 | H | 45.537068 | 7.326063 | 27.157638 |
| H | 25.590912 | 2.433848 | 22.969496 | H | 46.248605 | 3.339254 | 24.474659 |
| H | 37.708869 | 2.970647 | 28.333671 | H | 50.943444 | 7.237121 | 30.260109 |
| H | 40.089095 | 2.363910 | 28.422830 | H | 47.059724 | 4.478270 | 29.318106 |
| H | 41.590305 | 2.972216 | 26.596572 | H | 45.229476 | 3.651530 | 30.661045 |
| H | 37.152452 | 5.179568 | 24.046982 | H | 46.912980 | 6.861830 | 17.595738 |
| H | 38.661340 | 5.722886 | 22.237014 | H | 56.056137 | 5.976855 | 21.104022 |
| H | 35.149474 | 2.328864 | 22.590764 | H | 10.790867 | 8.127624 | 42.499081 |
| H | 35.298599 | 1.793594 | 20.190364 | H | 9.244460  | 6.787081 | 41.129974 |
| H | 34.099872 | 3.170561 | 18.536508 | H | 12.055728 | 2.325676 | 38.543251 |
| H | 32.263438 | 6.143040 | 22.826036 | H | 8.519547  | 3.171612 | 38.239185 |
| H | 31.124610 | 7.499363 | 21.165214 | H | 20.683190 | 2.873055 | 43.890899 |
| H | 29.969941 | 7.530003 | 27.060432 | H | 23.069469 | 2.331373 | 44.129849 |
| H | 43.122797 | 7.747337 | 27.027151 | H | 24.669987 | 2.992785 | 42.406918 |



|   |           |          |           |   |           |          |           |
|---|-----------|----------|-----------|---|-----------|----------|-----------|
| H | 20.331737 | 5.020814 | 39.557518 | H | 40.351742 | 6.387514 | 41.343430 |
| H | 21.937959 | 5.586484 | 37.834922 | H | 29.487167 | 3.766663 | 40.576844 |
| H | 18.079036 | 2.240772 | 37.922071 | H | 43.444265 | 2.114195 | 38.661295 |
| H | 18.095710 | 1.777582 | 35.507490 | H | 34.079048 | 8.096437 | 45.893564 |
| H | 16.923338 | 3.249571 | 33.957624 | H | 35.457499 | 7.623528 | 32.579708 |
| H | 15.229143 | 6.137235 | 38.412527 | H | 33.582909 | 6.964567 | 33.994919 |
| H | 14.039716 | 7.552284 | 36.842499 | H | 30.549662 | 5.001254 | 44.790113 |
| H | 13.169626 | 7.508505 | 42.647833 | H | 28.706142 | 3.974752 | 46.017969 |
| H | 25.901218 | 7.871714 | 43.029000 | H | 28.629848 | 3.830100 | 33.021382 |
| H | 24.604522 | 6.259101 | 41.747216 | H | 29.792427 | 7.455079 | 33.310950 |
| H | 13.612370 | 3.635639 | 39.863472 | H | 39.378914 | 6.315916 | 37.336639 |
| H | 28.178019 | 2.168133 | 39.215265 | H | 39.906635 | 2.418162 | 38.512500 |
| H | 18.576864 | 6.845202 | 45.759893 | H | 52.223721 | 3.706426 | 43.946616 |
| H | 19.579648 | 7.444565 | 32.722155 | H | 54.659293 | 3.327298 | 44.019547 |
| H | 17.668292 | 6.656968 | 34.020255 | H | 56.055398 | 3.866383 | 42.061114 |
| H | 14.414460 | 4.514819 | 44.837298 | H | 51.374759 | 5.453828 | 39.579944 |
| H | 12.520474 | 3.876682 | 46.194060 | H | 52.752401 | 5.975875 | 37.680057 |
| H | 12.755564 | 3.612069 | 32.624426 | H | 49.673609 | 2.684833 | 38.005584 |
| H | 14.062356 | 7.192055 | 33.314441 | H | 49.792898 | 2.216075 | 35.596487 |
| H | 24.117543 | 5.702670 | 37.149656 | H | 48.496416 | 3.538765 | 34.013385 |
| H | 24.773900 | 2.252382 | 38.693300 | H | 46.445959 | 6.287285 | 38.407808 |
| H | 36.328708 | 2.284948 | 43.572566 | H | 45.145674 | 7.558843 | 36.802194 |
| H | 38.776969 | 1.706696 | 43.591879 | H | 44.234201 | 7.514429 | 42.655437 |
| H | 40.307312 | 2.713973 | 41.968987 | H | 44.939125 | 3.583028 | 39.886466 |
| H | 35.775557 | 5.096487 | 39.702344 | H | 49.620731 | 7.207748 | 45.860358 |
| H | 37.269679 | 6.062127 | 38.029124 | H | 50.729770 | 7.824795 | 32.638728 |
| H | 33.957168 | 3.192168 | 38.525168 | H | 48.890772 | 6.932638 | 33.973877 |
| H | 34.237485 | 2.539308 | 36.114459 | H | 45.704964 | 4.513403 | 44.849977 |
| H | 33.050383 | 3.748240 | 34.357956 | H | 43.850277 | 3.701284 | 46.167514 |
| H | 31.049354 | 7.023613 | 38.437123 | H | 44.235628 | 3.455522 | 32.710278 |
| H | 29.781927 | 8.204158 | 36.669555 | H | 45.249551 | 7.154529 | 33.280311 |
| H | 28.407562 | 7.730078 | 43.094162 | H | 54.726637 | 5.972242 | 36.665649 |
| H | 41.814698 | 7.911751 | 42.569885 | H | 9.463400  | 8.127107 | 58.062853 |

|                                |                                |
|--------------------------------|--------------------------------|
| H 7.916962 6.786754 56.693476  | H 32.758675 2.257062 51.032589 |
| H 10.728214 2.325424 54.106692 | H 31.595211 3.725819 49.472396 |
| H 7.191743 3.170763 53.803272  | H 29.535480 6.368435 53.927383 |
| H 19.533510 2.935333 59.269191 | H 28.366910 7.785249 52.337373 |
| H 21.933154 2.394147 59.277111 | H 27.309000 7.509047 58.236740 |
| H 23.385828 3.182133 57.480004 | H 40.502705 7.774616 58.231583 |
| H 18.840299 5.407964 55.147380 | H 39.037183 6.388785 56.871806 |
| H 20.301357 6.134020 53.365982 | H 27.968647 3.703520 55.293630 |
| H 16.917063 2.472913 53.507738 | H 42.083757 2.186760 54.005507 |
| H 16.986790 2.004805 51.097428 | H 32.787144 6.741567 61.409457 |
| H 15.806807 3.441370 49.524456 | H 33.821643 8.508644 48.358891 |
| H 14.026786 6.351679 53.933198 | H 32.052852 7.394601 49.630506 |
| H 12.853113 7.747560 52.334496 | H 28.749448 4.374923 60.399964 |
| H 11.840431 7.509402 58.212300 | H 26.897644 3.574679 61.718402 |
| H 24.900196 7.976325 58.123234 | H 27.728435 3.670523 47.989367 |
| H 23.423170 6.546145 56.815898 | H 28.592572 7.540247 48.799133 |
| H 12.285124 3.636330 55.427420 | H 38.086349 6.137767 52.466982 |
| H 26.466767 2.316852 53.988420 | H 38.563499 2.575621 53.811411 |
| H 17.168197 6.739776 61.410674 | H 50.894959 3.699877 59.506310 |
| H 18.449368 7.432327 48.142773 | H 53.331575 3.325519 59.581308 |
| H 16.532970 6.741423 49.486911 | H 54.727861 3.865760 57.623184 |
| H 13.130053 4.375193 60.400593 | H 50.047679 5.459194 55.145126 |
| H 11.277943 3.574286 61.719272 | H 51.424943 5.976993 53.243003 |
| H 11.525707 3.784232 48.249503 | H 48.437453 2.765669 53.485425 |
| H 12.926222 7.357419 48.810076 | H 48.533580 2.308918 51.073673 |
| H 22.414144 6.294342 52.506679 | H 47.157649 3.581503 49.519324 |
| H 22.942998 2.680805 53.821857 | H 45.091702 6.249060 53.956675 |
| H 35.102821 3.045610 59.307924 | H 43.724371 7.483036 52.376567 |
| H 37.484970 2.437945 59.337722 | H 42.909653 7.312421 58.337509 |
| H 38.957515 3.115432 57.513190 | H 43.582194 3.540196 55.351911 |
| H 34.485137 5.431604 55.126351 | H 48.405837 6.744378 61.408016 |
| H 35.967616 6.054004 53.320537 | H 49.383642 7.786440 48.237303 |
| H 32.586447 2.622464 53.456679 | H 47.509615 6.923858 49.539368 |

|   |           |           |           |              |           |           |           |
|---|-----------|-----------|-----------|--------------|-----------|-----------|-----------|
| H | 44.381332 | 4.364330  | 60.399443 | C            | 37.341498 | 6.828482  | 43.550381 |
| H | 42.519320 | 3.571612  | 61.717769 | C            | 38.657543 | 7.226913  | 43.784853 |
| H | 42.850939 | 3.475365  | 48.213299 | C            | 39.254221 | 6.934663  | 45.015378 |
| H | 43.813200 | 7.120246  | 48.849483 | C            | 38.527328 | 6.261701  | 46.002860 |
| H | 53.399033 | 5.972106  | 52.228095 | C            | 37.202400 | 5.879070  | 45.758933 |
| H | 17.068204 | 7.158116  | 63.835978 | C            | 36.600932 | 6.156579  | 44.528848 |
| H | 15.148079 | 6.357296  | 65.155545 | N            | 36.698985 | 7.122398  | 42.275095 |
| H | 10.263108 | 3.421930  | 63.796999 | H            | 35.178034 | 9.194506  | 38.972689 |
| H | 32.687947 | 7.158499  | 63.835039 | H            | 34.903962 | 7.253571  | 40.496257 |
| H | 30.767919 | 6.357336  | 65.154658 | H            | 34.887150 | 7.837082  | 42.993730 |
| H | 25.881420 | 3.424972  | 63.795537 | H            | 35.313533 | 11.075876 | 40.608096 |
| H | 48.307563 | 7.159028  | 63.833811 | H            | 36.824065 | 11.005984 | 39.669567 |
| H | 46.387788 | 6.357258  | 65.153514 | H            | 37.944639 | 9.757107  | 41.537506 |
| H | 41.501188 | 3.425031  | 63.794599 | H            | 37.306662 | 11.297562 | 42.128860 |
| H | 54.922581 | 4.682826  | 55.325855 | H            | 35.250007 | 10.165937 | 42.991236 |
| H | 56.250120 | 4.683133  | 39.763657 | H            | 36.698407 | 9.464639  | 43.738147 |
| H | 57.578891 | 4.683400  | 24.200591 | H            | 36.693803 | 8.513735  | 39.604545 |
| H | 32.654245 | 5.043349  | 18.026539 | H            | 39.211173 | 7.771216  | 43.013696 |
| H | 17.034856 | 5.043609  | 18.026692 | H            | 40.289052 | 7.237997  | 45.201346 |
| H | 10.176559 | 4.915318  | 24.089682 | H            | 38.993934 | 6.036832  | 46.966884 |
| H | 8.848023  | 4.915616  | 39.653303 | H            | 36.627078 | 5.356116  | 46.528476 |
| H | 7.520585  | 4.915609  | 55.216383 | H            | 35.570832 | 5.848299  | 44.328093 |
| H | 12.998946 | 5.199012  | 65.269013 | H            | 37.396744 | 7.295152  | 41.543082 |
| H | 28.618717 | 5.199023  | 65.268139 | H            | 36.095575 | 6.257526  | 41.984238 |
| H | 44.238629 | 5.198818  | 65.267053 |              |           |           |           |
| H | 48.273941 | 5.043153  | 18.026052 |              |           |           |           |
| C | 35.643123 | 8.221280  | 42.296787 | (S,S)-1-Int3 |           |           |           |
| C | 34.962314 | 8.284446  | 40.899974 | C            | 12.487000 | 7.261000  | 26.395000 |
| C | 35.790821 | 9.099264  | 39.885375 | C            | 11.616000 | 6.503000  | 25.622000 |
| C | 36.217822 | 10.468350 | 40.421568 | C            | 12.086000 | 5.395000  | 24.927000 |
| C | 37.001563 | 10.312306 | 41.732883 | C            | 13.428000 | 5.043000  | 25.007000 |
| C | 36.157509 | 9.573145  | 42.780442 | C            | 13.027000 | 3.179000  | 23.539000 |
| O | 33.701715 | 8.809728  | 41.078780 | C            | 11.685000 | 3.529000  | 23.460000 |
|   |           |           |           | C            | 11.215000 | 4.638000  | 24.154000 |

|    |           |          |           |    |           |          |           |
|----|-----------|----------|-----------|----|-----------|----------|-----------|
| O  | 10.782000 | 2.793000 | 22.654000 | C  | 28.045295 | 7.154748 | 26.538707 |
| Cu | 18.543832 | 6.107254 | 26.003160 | C  | 27.196540 | 6.298931 | 25.844884 |
| Cu | 17.963211 | 3.719571 | 26.530347 | C  | 27.693550 | 5.164615 | 25.171012 |
| C  | 22.230158 | 3.999870 | 26.401639 | C  | 29.087553 | 4.891783 | 25.219624 |
| C  | 22.756089 | 3.223695 | 27.450424 | C  | 13.900000 | 3.935000 | 24.313000 |
| C  | 24.111060 | 2.921917 | 27.505489 | C  | 28.734676 | 2.974896 | 23.770736 |
| C  | 24.965917 | 3.382891 | 26.509999 | C  | 27.369873 | 3.206464 | 23.747283 |
| C  | 24.479561 | 4.135477 | 25.424290 | C  | 26.824254 | 4.306317 | 24.446862 |
| C  | 23.091978 | 4.433062 | 25.354004 | O  | 26.591116 | 2.304817 | 23.024671 |
| C  | 22.599535 | 5.119203 | 24.223127 | O  | 16.594332 | 6.411827 | 25.835894 |
| C  | 23.466744 | 5.541731 | 23.220487 | O  | 16.064162 | 4.272994 | 26.319211 |
| C  | 24.833317 | 5.290342 | 23.308735 | C  | 15.738349 | 5.467653 | 25.978873 |
| C  | 25.351010 | 4.575842 | 24.397413 | C  | 17.918160 | 5.864046 | 30.218689 |
| O  | 25.687179 | 5.712815 | 22.295723 | C  | 18.907664 | 6.634046 | 30.856547 |
| O  | 20.438353 | 5.554200 | 26.182809 | C  | 16.770835 | 5.452701 | 30.952923 |
| O  | 19.928752 | 3.407512 | 26.653444 | C  | 15.697441 | 4.775541 | 30.335688 |
| C  | 20.779970 | 4.340515 | 26.419553 | C  | 14.595419 | 4.370914 | 31.082820 |
| C  | 18.226927 | 4.022014 | 22.293999 | O  | 18.429665 | 6.437275 | 27.961350 |
| C  | 18.992915 | 2.941012 | 21.873981 | O  | 17.909183 | 4.292021 | 28.428836 |
| C  | 19.081890 | 2.638017 | 20.519979 | C  | 18.102103 | 5.509640 | 28.785589 |
| C  | 18.404876 | 3.417023 | 19.587993 | Cu | 34.206789 | 6.089923 | 26.026947 |
| C  | 17.639888 | 4.497024 | 20.008011 | Cu | 33.644395 | 3.704432 | 26.571102 |
| C  | 17.550913 | 4.800019 | 21.362013 | C  | 37.894340 | 3.943109 | 26.329528 |
| C  | 16.783924 | 5.881020 | 21.784030 | C  | 38.427051 | 3.215967 | 27.409992 |
| C  | 16.107910 | 6.659026 | 20.850045 | C  | 39.770665 | 2.867834 | 27.443588 |
| C  | 16.197885 | 6.355031 | 19.497042 | C  | 40.606948 | 3.233776 | 26.395475 |
| C  | 16.963875 | 5.274030 | 19.076025 | C  | 40.113024 | 3.941397 | 25.282584 |
| O  | 15.523872 | 7.185037 | 18.539057 | C  | 38.735331 | 4.284461 | 25.234852 |
| O  | 18.568766 | 5.538205 | 24.103524 | C  | 38.231026 | 4.925985 | 24.084422 |
| O  | 18.034150 | 3.397805 | 24.577775 | C  | 39.080197 | 5.254192 | 23.031677 |
| C  | 18.270931 | 4.342461 | 23.744010 | C  | 40.441456 | 4.965106 | 23.097829 |
| C  | 14.301000 | 5.801000 | 25.782000 | C  | 40.970293 | 4.302200 | 24.213976 |
| C  | 13.829000 | 6.909000 | 26.476000 | O  | 41.279435 | 5.307991 | 22.042601 |

|   |           |          |           |    |           |          |           |
|---|-----------|----------|-----------|----|-----------|----------|-----------|
| O | 36.111483 | 5.518180 | 26.115718 | C  | 32.906490 | 5.422101 | 31.187000 |
| O | 35.602314 | 3.379040 | 26.621690 | C  | 31.785072 | 4.689572 | 30.747588 |
| C | 36.451391 | 4.303823 | 26.360141 | C  | 30.794139 | 4.311363 | 31.649558 |
| C | 33.846854 | 4.021972 | 22.293718 | O  | 34.199981 | 6.406443 | 27.990651 |
| C | 34.612831 | 2.940969 | 21.873683 | O  | 33.681415 | 4.268575 | 28.485318 |
| C | 34.701781 | 2.637978 | 20.519678 | C  | 33.931978 | 5.479015 | 28.836444 |
| C | 34.024753 | 3.416989 | 19.587708 | Cu | 49.694738 | 6.196303 | 25.988585 |
| C | 33.259776 | 4.496991 | 20.007741 | Cu | 49.348636 | 3.774568 | 26.557756 |
| C | 33.170826 | 4.799983 | 21.361747 | C  | 53.571003 | 4.464792 | 26.367939 |
| C | 32.403848 | 5.880986 | 21.783781 | C  | 54.157058 | 3.947774 | 27.515902 |
| C | 31.727821 | 6.658997 | 20.849810 | C  | 55.530059 | 3.732759 | 27.559826 |
| C | 31.817771 | 6.355005 | 19.496805 | C  | 56.316002 | 4.036762 | 26.454787 |
| C | 32.583748 | 5.274002 | 19.075771 | C  | 55.729946 | 4.554780 | 25.305823 |
| O | 31.143743 | 7.185016 | 18.538835 | C  | 54.356947 | 4.768795 | 25.262899 |
| O | 34.156754 | 5.538126 | 24.118672 | C  | 53.770890 | 5.287813 | 24.113936 |
| O | 33.650368 | 3.394197 | 24.597538 | C  | 54.557834 | 5.591815 | 23.007897 |
| C | 33.875797 | 4.339365 | 23.756318 | C  | 55.929834 | 5.377800 | 23.052821 |
| C | 29.942449 | 5.742645 | 25.974801 | C  | 56.515889 | 4.858782 | 24.200784 |
| C | 29.405360 | 6.881532 | 26.601188 | O  | 56.643771 | 5.617805 | 21.841785 |
| C | 43.539060 | 6.853924 | 26.516962 | O  | 51.635987 | 5.832761 | 26.127420 |
| C | 42.735389 | 6.011977 | 25.758814 | O  | 51.338483 | 3.652630 | 26.629830 |
| C | 43.277805 | 4.909363 | 25.065627 | C  | 52.093639 | 4.661972 | 26.379911 |
| C | 44.674746 | 4.661141 | 25.152500 | C  | 49.466779 | 4.021876 | 22.293156 |
| C | 29.593510 | 3.800507 | 24.484681 | C  | 50.232745 | 2.940872 | 21.873104 |
| C | 44.406906 | 2.781784 | 23.639764 | C  | 50.321669 | 2.637885 | 20.519096 |
| C | 43.039503 | 2.994705 | 23.568839 | C  | 49.644627 | 3.416901 | 19.587140 |
| C | 42.449330 | 4.061848 | 24.283183 | C  | 48.879661 | 4.496905 | 20.007192 |
| O | 42.302619 | 2.100036 | 22.795890 | C  | 48.790737 | 4.799893 | 21.361200 |
| O | 32.238651 | 6.405278 | 25.963487 | C  | 48.023772 | 5.880897 | 21.783251 |
| O | 31.744353 | 4.259482 | 26.450665 | C  | 47.347731 | 6.658913 | 20.849295 |
| C | 31.394073 | 5.454053 | 26.140094 | C  | 47.437655 | 6.354926 | 19.496287 |
| C | 33.933299 | 5.832641 | 30.288487 | C  | 48.203620 | 5.273922 | 19.075235 |
| C | 34.986004 | 6.633164 | 30.772327 | O  | 46.763613 | 7.184943 | 18.538331 |

|    |           |          |           |   |           |          |           |
|----|-----------|----------|-----------|---|-----------|----------|-----------|
| O  | 49.731681 | 5.588834 | 24.092371 | C | 21.459249 | 5.229755 | 39.803160 |
| O  | 49.390682 | 3.420596 | 24.603621 | C | 22.379077 | 5.614014 | 38.831163 |
| C  | 49.527027 | 4.366865 | 23.748841 | C | 23.736671 | 5.341585 | 38.984058 |
| C  | 45.486524 | 5.513839 | 25.949113 | C | 24.194622 | 4.661514 | 40.117348 |
| C  | 44.901359 | 6.610523 | 26.607826 | O | 24.638785 | 5.723196 | 37.999120 |
| C  | 45.225705 | 3.597406 | 24.411485 | O | 19.150598 | 5.662880 | 41.655697 |
| O  | 47.717546 | 6.325333 | 25.887791 | O | 18.677141 | 3.505684 | 42.113849 |
| O  | 47.398532 | 4.153843 | 26.409767 | C | 19.514179 | 4.457930 | 41.908930 |
| C  | 46.953516 | 5.315231 | 26.087879 | C | 16.936010 | 4.177753 | 37.741799 |
| C  | 49.190369 | 5.953923 | 30.221084 | C | 17.654137 | 3.082818 | 37.229365 |
| C  | 50.119048 | 6.810164 | 30.839813 | C | 17.667918 | 2.815298 | 35.867352 |
| C  | 48.091187 | 5.453412 | 30.973733 | C | 16.962420 | 3.634489 | 34.992966 |
| C  | 47.073143 | 4.679740 | 30.376066 | C | 16.204624 | 4.727048 | 35.464022 |
| C  | 46.016160 | 4.193478 | 31.139025 | C | 16.171963 | 4.989753 | 36.859407 |
| O  | 49.602349 | 6.545628 | 27.946180 | C | 15.352356 | 6.031757 | 37.338004 |
| O  | 49.299183 | 4.367135 | 28.449996 | C | 14.627618 | 6.818846 | 36.452232 |
| C  | 49.383085 | 5.602039 | 28.788394 | C | 14.684970 | 6.601863 | 35.085682 |
| C  | 11.158286 | 7.260970 | 41.959133 | C | 15.479479 | 5.554678 | 34.566388 |
| C  | 10.287269 | 6.502976 | 41.186145 | O | 13.954911 | 7.472556 | 34.279426 |
| C  | 10.757253 | 5.394976 | 40.491133 | O | 17.260357 | 5.651067 | 39.584362 |
| C  | 12.099253 | 5.042971 | 40.571108 | O | 16.791511 | 3.487486 | 40.018776 |
| C  | 11.698221 | 3.178978 | 39.103109 | C | 17.002387 | 4.453698 | 39.201005 |
| C  | 10.356221 | 3.528983 | 39.024134 | C | 12.972270 | 5.800966 | 41.346096 |
| C  | 9.886237  | 4.637982 | 39.718146 | C | 12.500286 | 6.908965 | 42.040108 |
| O  | 9.453204  | 2.792989 | 38.218147 | C | 27.069919 | 7.640118 | 41.440063 |
| Cu | 17.235782 | 6.181895 | 41.496568 | C | 26.165117 | 6.678518 | 41.042730 |
| Cu | 16.705723 | 3.776811 | 41.985644 | C | 26.575021 | 5.356923 | 40.676361 |
| C  | 20.972776 | 4.148727 | 41.975817 | C | 27.981947 | 5.044884 | 40.772059 |
| C  | 21.448829 | 3.411973 | 43.076111 | C | 12.571237 | 3.934972 | 39.877096 |
| C  | 22.801424 | 3.130759 | 43.218945 | C | 27.506224 | 2.806255 | 39.939928 |
| C  | 23.705815 | 3.563066 | 42.255830 | C | 26.118401 | 3.097183 | 39.865717 |
| C  | 23.274431 | 4.267231 | 41.117087 | C | 25.642519 | 4.355126 | 40.225588 |
| C  | 21.890513 | 4.563738 | 40.968424 | O | 25.371729 | 2.043210 | 39.416265 |

|    |           |          |           |   |           |          |           |
|----|-----------|----------|-----------|---|-----------|----------|-----------|
| O  | 15.268481 | 6.451471 | 41.360130 | C | 33.437252 | 4.552112 | 38.179032 |
| O  | 14.788595 | 4.293252 | 41.798994 | C | 34.164186 | 3.448571 | 37.767860 |
| C  | 14.428875 | 5.490100 | 41.501280 | C | 34.247559 | 3.137783 | 36.393831 |
| C  | 16.680842 | 5.857334 | 45.720121 | C | 33.564861 | 3.893730 | 35.462685 |
| C  | 17.678692 | 6.631358 | 46.340826 | C | 32.766265 | 5.021830 | 35.838565 |
| C  | 18.805586 | 6.951828 | 32.204568 | C | 32.730696 | 5.369527 | 37.238168 |
| C  | 17.711352 | 6.509914 | 32.939794 | C | 31.940363 | 6.484337 | 37.645408 |
| C  | 16.683073 | 5.760190 | 32.336412 | C | 31.232200 | 7.213573 | 36.725931 |
| C  | 15.557021 | 5.428047 | 46.480684 | C | 31.255000 | 6.876917 | 35.345486 |
| C  | 14.479790 | 4.736454 | 45.887550 | C | 32.004025 | 5.793696 | 34.891760 |
| C  | 13.397179 | 4.322914 | 46.658106 | O | 30.490278 | 7.710249 | 34.579742 |
| C  | 14.531802 | 4.623308 | 32.450780 | O | 33.647339 | 5.987827 | 40.061852 |
| C  | 15.563283 | 5.326090 | 33.088006 | O | 32.978094 | 3.868814 | 40.380550 |
| O  | 13.426124 | 4.210461 | 33.185839 | C | 33.348375 | 4.832718 | 39.647309 |
| O  | 17.135892 | 6.474127 | 43.462239 | C | 28.897888 | 6.059618 | 41.219995 |
| O  | 16.644368 | 4.316011 | 43.897599 | C | 28.443077 | 7.335702 | 41.518814 |
| C  | 16.831714 | 5.528662 | 44.275177 | C | 42.253148 | 7.092710 | 41.874487 |
| Cu | 33.051786 | 6.866102 | 41.763118 | C | 41.387164 | 6.104502 | 41.428454 |
| Cu | 32.559668 | 4.124089 | 42.260416 | C | 41.873277 | 4.880253 | 40.931649 |
| C  | 36.825203 | 4.075357 | 43.246915 | C | 43.278647 | 4.657167 | 40.898636 |
| C  | 37.524223 | 3.647819 | 44.358895 | C | 28.407490 | 3.742898 | 40.376405 |
| C  | 38.876461 | 3.260360 | 44.223661 | C | 42.872876 | 2.521812 | 39.814019 |
| C  | 39.520349 | 3.371209 | 43.010289 | C | 41.502468 | 2.700430 | 39.901876 |
| C  | 38.852372 | 3.864706 | 41.842474 | C | 40.982556 | 3.884655 | 40.458993 |
| C  | 37.455665 | 4.187935 | 41.965607 | O | 40.697668 | 1.663063 | 39.439172 |
| C  | 36.765281 | 4.679477 | 40.823020 | O | 31.147182 | 6.792341 | 41.315199 |
| C  | 37.409719 | 4.837093 | 39.621164 | O | 30.715416 | 4.646530 | 41.809235 |
| C  | 38.793573 | 4.539751 | 39.492024 | C | 30.359210 | 5.809547 | 41.448941 |
| C  | 39.517878 | 4.064298 | 40.585284 | C | 31.646626 | 5.625582 | 45.959524 |
| O  | 39.415435 | 4.733049 | 38.297726 | C | 32.278653 | 6.701784 | 46.566037 |
| O  | 35.183367 | 5.436440 | 44.238504 | C | 35.057306 | 6.995671 | 32.110554 |
| O  | 34.527620 | 3.934939 | 42.688654 | C | 34.070909 | 6.578353 | 32.995128 |
| C  | 35.398512 | 4.476852 | 43.381475 | C | 32.985693 | 5.797807 | 32.558290 |

|    |           |          |           |   |           |          |           |
|----|-----------|----------|-----------|---|-----------|----------|-----------|
| C  | 30.670632 | 4.851901 | 46.677269 | C | 45.964928 | 6.533618 | 35.081099 |
| C  | 29.909232 | 3.812300 | 46.071010 | C | 46.811562 | 5.512878 | 34.593300 |
| C  | 28.993771 | 3.088529 | 46.797981 | O | 45.218060 | 7.363059 | 34.247115 |
| C  | 30.883663 | 4.656264 | 32.995924 | O | 48.450393 | 5.739102 | 39.647172 |
| C  | 31.967830 | 5.408754 | 33.459295 | O | 48.108638 | 3.557048 | 40.105281 |
| O  | 29.875726 | 4.287768 | 33.877532 | C | 48.268845 | 4.524268 | 39.276444 |
| O  | 32.673773 | 6.204710 | 43.897412 | C | 44.158025 | 5.641668 | 41.439137 |
| O  | 32.004430 | 4.107931 | 44.142994 | C | 43.620158 | 6.861502 | 41.891195 |
| C  | 32.102068 | 5.295028 | 44.578719 | C | 43.760523 | 3.478393 | 40.295582 |
| Cu | 48.393094 | 6.289984 | 41.551877 | O | 46.411522 | 6.440339 | 41.417463 |
| Cu | 48.011187 | 3.863327 | 42.071096 | O | 46.069533 | 4.264795 | 41.890738 |
| C  | 52.242278 | 4.464620 | 41.931334 | C | 45.632828 | 5.431676 | 41.580171 |
| C  | 52.828353 | 3.947597 | 43.079285 | C | 47.850552 | 5.993762 | 45.772442 |
| C  | 54.201353 | 3.732577 | 43.123183 | C | 48.818273 | 6.797543 | 46.402331 |
| C  | 54.987278 | 4.036581 | 42.018131 | C | 50.007176 | 7.129323 | 32.187159 |
| C  | 54.401203 | 4.554604 | 40.869180 | C | 48.962164 | 6.604389 | 32.939925 |
| C  | 53.028203 | 4.768624 | 40.826281 | C | 47.992110 | 5.767873 | 32.354993 |
| C  | 52.442128 | 5.287648 | 39.677330 | C | 46.718192 | 5.553951 | 46.512189 |
| C  | 53.229054 | 5.591652 | 38.571278 | C | 45.669055 | 4.834196 | 45.902909 |
| C  | 54.601054 | 5.377632 | 38.616177 | C | 44.575594 | 4.411860 | 46.653059 |
| C  | 55.187129 | 4.858609 | 39.764128 | C | 45.941810 | 4.460558 | 32.503499 |
| O  | 55.314970 | 5.617639 | 37.405129 | C | 46.916458 | 5.255605 | 33.121452 |
| O  | 50.332893 | 5.883223 | 41.709790 | O | 44.880688 | 3.966885 | 33.254384 |
| O  | 49.993100 | 3.703691 | 42.186220 | O | 48.280982 | 6.602172 | 43.511454 |
| C  | 50.768336 | 4.699201 | 41.950806 | O | 47.923407 | 4.423373 | 43.977433 |
| C  | 48.243719 | 4.228489 | 37.818919 | C | 48.034169 | 5.651388 | 44.336412 |
| C  | 49.024245 | 3.163815 | 37.334431 | C | 9.830848  | 7.260896 | 57.522290 |
| C  | 49.088405 | 2.888511 | 35.975300 | C | 8.959816  | 6.502907 | 56.749315 |
| C  | 48.371259 | 3.668875 | 35.075142 | C | 9.429783  | 5.394908 | 56.054291 |
| C  | 47.551722 | 4.728359 | 35.516711 | C | 10.771783 | 5.042898 | 56.134241 |
| C  | 47.470968 | 5.001097 | 36.908586 | C | 10.370718 | 3.178911 | 54.666243 |
| C  | 46.597045 | 6.012833 | 37.355197 | C | 9.028718  | 3.528920 | 54.587293 |
| C  | 45.865746 | 6.762849 | 36.443034 | C | 8.558750  | 4.637919 | 55.281317 |



|    |           |          |           |    |           |          |           |
|----|-----------|----------|-----------|----|-----------|----------|-----------|
| O  | 8.125684  | 2.792932 | 53.781319 | C  | 25.312347 | 6.837903 | 57.620845 |
| Cu | 15.901671 | 6.097073 | 57.131764 | C  | 24.477954 | 6.012051 | 56.877780 |
| Cu | 15.318919 | 3.693576 | 57.566475 | C  | 24.984906 | 4.896179 | 56.179486 |
| C  | 19.574270 | 3.945545 | 57.472043 | C  | 26.376541 | 4.615342 | 56.247672 |
| C  | 20.102233 | 3.194377 | 58.537643 | C  | 11.243751 | 3.934900 | 55.440217 |
| C  | 21.446277 | 2.845472 | 58.567280 | C  | 26.044502 | 2.743763 | 54.737599 |
| C  | 22.285887 | 3.232104 | 57.528462 | C  | 24.681552 | 2.986437 | 54.688162 |
| C  | 21.795239 | 3.962506 | 56.428899 | C  | 24.126103 | 4.065195 | 55.412832 |
| C  | 20.419044 | 4.311513 | 56.387897 | O  | 23.912730 | 2.106936 | 53.928898 |
| C  | 19.918520 | 4.982461 | 55.252094 | O  | 13.947332 | 6.413812 | 56.971324 |
| C  | 20.768951 | 5.329849 | 54.206804 | O  | 13.420225 | 4.260869 | 57.384303 |
| C  | 22.127428 | 5.028032 | 54.264126 | C  | 13.089561 | 5.466655 | 57.090486 |
| C  | 22.652324 | 4.336740 | 55.364587 | C  | 15.283046 | 5.695821 | 61.352095 |
| O  | 22.966818 | 5.385726 | 53.215261 | C  | 16.314087 | 6.385804 | 61.978046 |
| O  | 17.798593 | 5.527548 | 57.299284 | C  | 17.606631 | 6.939713 | 47.692948 |
| O  | 17.275444 | 3.366726 | 57.687420 | C  | 16.531763 | 6.488584 | 48.450337 |
| C  | 18.131132 | 4.303077 | 57.496143 | C  | 15.495283 | 5.735340 | 47.866786 |
| C  | 15.645817 | 4.156844 | 53.332735 | C  | 14.198081 | 5.242825 | 62.095148 |
| C  | 16.350395 | 3.044012 | 52.839526 | C  | 13.166040 | 4.552842 | 61.469196 |
| C  | 16.400791 | 2.778056 | 51.478161 | C  | 12.083075 | 4.099846 | 62.213249 |
| C  | 15.741814 | 3.613821 | 50.583781 | C  | 13.354322 | 4.585406 | 48.025294 |
| C  | 14.998725 | 4.725061 | 51.032801 | C  | 14.390190 | 5.301677 | 48.639986 |
| C  | 14.937622 | 4.994024 | 52.427162 | O  | 12.264462 | 4.168989 | 48.781818 |
| C  | 14.142964 | 6.065837 | 52.880343 | O  | 15.773643 | 6.355930 | 59.103746 |
| C  | 13.467738 | 6.872275 | 51.972767 | O  | 15.268194 | 4.192394 | 59.488220 |
| C  | 13.545214 | 6.641348 | 50.609288 | C  | 15.449350 | 5.397276 | 59.894425 |
| C  | 14.313356 | 5.563400 | 50.114190 | Cu | 31.455851 | 5.935919 | 57.114712 |
| O  | 12.856616 | 7.525439 | 49.781259 | Cu | 30.991576 | 3.529066 | 57.667761 |
| O  | 15.944709 | 5.600887 | 55.207478 | C  | 35.229880 | 3.954895 | 57.488199 |
| O  | 15.408430 | 3.444236 | 55.594606 | C  | 35.790785 | 3.263533 | 58.577666 |
| C  | 15.666688 | 4.416414 | 54.797659 | C  | 37.144292 | 2.954821 | 58.607697 |
| C  | 11.644816 | 5.800887 | 56.909216 | C  | 37.962501 | 3.322196 | 57.545667 |
| C  | 11.172849 | 6.908886 | 57.603240 | C  | 37.442017 | 3.996482 | 56.424360 |

|   |           |          |           |    |           |          |           |
|---|-----------|----------|-----------|----|-----------|----------|-----------|
| C | 36.055245 | 4.304593 | 56.383225 | O  | 39.587698 | 2.147575 | 53.905680 |
| C | 35.526689 | 4.916723 | 55.227430 | O  | 29.485350 | 6.167926 | 57.015967 |
| C | 36.358926 | 5.250376 | 54.163241 | O  | 29.066884 | 4.002076 | 57.486237 |
| C | 37.726329 | 4.990780 | 54.219503 | C  | 28.675595 | 5.187802 | 57.186655 |
| C | 38.280247 | 4.353752 | 55.338757 | C  | 30.903120 | 5.695641 | 61.351269 |
| O | 38.545666 | 5.333070 | 53.149831 | C  | 31.934175 | 6.385618 | 61.977205 |
| O | 33.382211 | 5.450038 | 57.246476 | C  | 32.015448 | 7.019292 | 47.913400 |
| O | 32.961337 | 3.297536 | 57.777020 | C  | 31.129018 | 6.259198 | 48.644532 |
| C | 33.772226 | 4.255150 | 57.511314 | C  | 30.423665 | 5.153867 | 48.064886 |
| C | 31.247121 | 3.795210 | 53.424231 | C  | 29.818167 | 5.242646 | 62.094340 |
| C | 32.238383 | 2.935454 | 52.920956 | C  | 28.786113 | 4.552669 | 61.468405 |
| C | 32.287886 | 2.623689 | 51.568821 | C  | 27.703159 | 4.099675 | 62.212476 |
| C | 31.344079 | 3.159550 | 50.698773 | C  | 28.797547 | 3.330828 | 48.183881 |
| C | 30.316644 | 4.004612 | 51.165712 | C  | 29.496710 | 4.354397 | 48.817950 |
| C | 30.260849 | 4.319308 | 52.548866 | O  | 27.921924 | 2.565211 | 48.892138 |
| C | 29.213422 | 5.130976 | 53.024512 | O  | 31.376023 | 6.278290 | 59.076796 |
| C | 28.254039 | 5.620679 | 52.145280 | O  | 30.938278 | 4.118862 | 59.559909 |
| C | 28.313635 | 5.346050 | 50.788158 | C  | 31.085298 | 5.345546 | 59.909850 |
| C | 29.353978 | 4.543601 | 50.278261 | Cu | 47.047282 | 6.247519 | 57.148601 |
| O | 27.343186 | 5.930782 | 49.979521 | Cu | 46.689161 | 3.790943 | 57.532298 |
| O | 31.457210 | 5.352525 | 55.210031 | C  | 50.914829 | 4.464394 | 57.493750 |
| O | 31.075442 | 3.185216 | 55.713335 | C  | 51.500923 | 3.947364 | 58.641689 |
| C | 31.263785 | 4.130179 | 54.868113 | C  | 52.873923 | 3.732339 | 58.685563 |
| C | 27.218301 | 5.445780 | 57.037355 | C  | 53.659830 | 4.036343 | 57.580498 |
| C | 26.669298 | 6.560123 | 57.697387 | C  | 53.073736 | 4.554373 | 56.431559 |
| C | 40.894612 | 6.918087 | 57.579974 | C  | 51.700736 | 4.768398 | 56.388685 |
| C | 40.077101 | 6.073553 | 56.840356 | C  | 51.114643 | 5.287428 | 55.239746 |
| C | 40.607356 | 4.972327 | 56.136632 | C  | 51.901549 | 5.591433 | 54.133681 |
| C | 42.008093 | 4.730771 | 56.188935 | C  | 53.273549 | 5.377407 | 54.178555 |
| C | 26.892051 | 3.539498 | 55.498065 | C  | 53.859642 | 4.858378 | 55.326493 |
| C | 41.710412 | 2.853869 | 54.678456 | O  | 53.987445 | 5.617415 | 52.967495 |
| C | 40.339878 | 3.053674 | 54.650385 | O  | 48.989549 | 5.858457 | 57.300477 |
| C | 39.762156 | 4.118194 | 55.379122 | O  | 48.674071 | 3.653577 | 57.666541 |

|   |           |          |           |   |           |          |           |
|---|-----------|----------|-----------|---|-----------|----------|-----------|
| C | 49.437762 | 4.671873 | 57.497094 | O | 46.577029 | 4.236740 | 59.461941 |
| C | 46.950742 | 4.365259 | 53.311295 | C | 46.675228 | 5.442228 | 59.890434 |
| C | 47.756532 | 3.334426 | 52.795362 | C | 16.262162 | 6.620790 | 63.347051 |
| C | 47.802681 | 3.079702 | 51.432221 | C | 15.179196 | 6.168795 | 64.090104 |
| C | 47.041531 | 3.846603 | 50.558087 | C | 14.147156 | 5.478812 | 63.465153 |
| C | 46.204246 | 4.879748 | 51.028788 | C | 12.031150 | 4.336833 | 63.582254 |
| C | 46.144472 | 5.133003 | 52.426228 | C | 13.063191 | 5.025817 | 64.207206 |
| C | 45.254984 | 6.116136 | 52.902854 | O | 10.943187 | 3.908837 | 64.361307 |
| C | 44.486126 | 6.857362 | 52.014493 | C | 31.882275 | 6.620600 | 63.346211 |
| C | 44.561509 | 6.646654 | 50.647469 | C | 30.799322 | 6.168606 | 64.089282 |
| C | 45.424530 | 5.654552 | 50.128439 | C | 29.767267 | 5.478629 | 63.464346 |
| O | 43.781950 | 7.472785 | 49.840777 | C | 27.651260 | 4.336658 | 63.581482 |
| O | 47.119094 | 5.799881 | 55.212126 | C | 28.683314 | 5.025635 | 64.206417 |
| O | 46.811460 | 3.592167 | 55.558503 | O | 26.563309 | 3.908663 | 64.360554 |
| C | 46.960260 | 4.601156 | 54.780109 | C | 47.502389 | 6.620356 | 63.345091 |
| C | 42.834847 | 5.580404 | 56.975653 | C | 46.419447 | 6.168363 | 64.088179 |
| C | 42.258448 | 6.675478 | 57.646167 | C | 45.387379 | 5.478391 | 63.463260 |
| C | 42.545334 | 3.676688 | 55.424472 | C | 43.271369 | 4.336426 | 63.580429 |
| O | 45.071621 | 6.391005 | 57.018243 | C | 44.303437 | 5.025398 | 64.205349 |
| O | 44.744327 | 4.184878 | 57.351520 | O | 42.183431 | 3.908432 | 64.359519 |
| C | 44.303090 | 5.368479 | 57.116955 | H | 12.119316 | 8.127274 | 26.935477 |
| C | 46.523195 | 5.695406 | 61.350162 | H | 10.573047 | 6.786884 | 25.566300 |
| C | 47.554262 | 6.385378 | 61.976082 | H | 13.383696 | 2.323147 | 22.982663 |
| C | 48.707010 | 7.127322 | 47.746696 | H | 9.847477  | 3.169785 | 22.676871 |
| C | 47.624464 | 6.664722 | 48.486190 | H | 22.104642 | 2.865308 | 28.239429 |
| C | 46.619348 | 5.877300 | 47.891870 | H | 24.503121 | 2.331578 | 28.327878 |
| C | 45.438253 | 5.242413 | 62.093251 | H | 26.015905 | 3.134251 | 26.587213 |
| C | 44.406185 | 4.552442 | 61.467332 | H | 21.543605 | 5.325826 | 24.086694 |
| C | 43.323243 | 4.099449 | 62.211421 | H | 23.065217 | 6.070065 | 22.366376 |
| C | 44.501457 | 4.681714 | 48.017669 | H | 19.533147 | 2.330445 | 22.589885 |
| C | 45.512634 | 5.419470 | 48.649185 | H | 19.679655 | 1.794319 | 20.190489 |
| O | 43.406315 | 4.247424 | 48.755776 | H | 18.480617 | 3.170906 | 18.536719 |
| O | 46.916702 | 6.441901 | 59.122108 | H | 16.649873 | 6.144613 | 22.827052 |

|   |           |          |           |   |           |          |           |
|---|-----------|----------|-----------|---|-----------|----------|-----------|
| H | 15.506636 | 7.500796 | 21.165209 | H | 53.552057 | 3.699481 | 28.381141 |
| H | 14.495768 | 7.508982 | 27.086590 | H | 55.987706 | 3.326019 | 28.455696 |
| H | 27.644139 | 8.032017 | 27.036405 | H | 57.384070 | 3.866316 | 26.497846 |
| H | 26.143497 | 6.541792 | 25.823007 | H | 52.703456 | 5.452905 | 24.015179 |
| H | 14.941437 | 3.633499 | 24.313293 | H | 54.081142 | 5.976177 | 22.116864 |
| H | 29.131049 | 2.135340 | 23.215446 | H | 50.777803 | 2.334880 | 22.589129 |
| H | 19.772114 | 6.976531 | 30.299050 | H | 50.920908 | 1.795281 | 20.189747 |
| H | 15.684766 | 4.561906 | 29.272221 | H | 49.720335 | 3.170945 | 18.535924 |
| H | 13.786869 | 3.850429 | 30.587642 | H | 47.863651 | 6.134680 | 22.823918 |
| H | 15.672237 | 6.861349 | 17.596353 | H | 46.741104 | 7.496731 | 21.164914 |
| H | 25.204900 | 6.236948 | 21.581129 | H | 45.515552 | 7.281409 | 27.197766 |
| H | 25.611111 | 2.531018 | 23.037315 | H | 46.288772 | 3.384601 | 24.406445 |
| H | 37.788288 | 2.925944 | 28.236611 | H | 50.944079 | 7.219490 | 30.267992 |
| H | 40.167662 | 2.312881 | 28.287960 | H | 47.068421 | 4.451157 | 29.315795 |
| H | 41.648030 | 2.946447 | 26.454458 | H | 45.250093 | 3.600070 | 30.658501 |
| H | 37.179755 | 5.172272 | 23.976292 | H | 46.912570 | 6.861458 | 17.595824 |
| H | 38.670716 | 5.747647 | 22.160650 | H | 56.056199 | 5.977167 | 21.104133 |
| H | 35.150567 | 2.329693 | 22.590650 | H | 10.791020 | 8.128292 | 42.498137 |
| H | 35.298849 | 1.793779 | 20.190328 | H | 9.244473  | 6.787163 | 41.129873 |
| H | 34.100000 | 3.170646 | 18.536493 | H | 12.055444 | 2.324899 | 38.544297 |
| H | 32.264756 | 6.142957 | 22.826385 | H | 8.519486  | 3.171522 | 38.239226 |
| H | 31.124763 | 7.499457 | 21.165216 | H | 20.758773 | 3.070894 | 43.839864 |
| H | 30.051710 | 7.551606 | 27.156384 | H | 23.152846 | 2.577761 | 44.084688 |
| H | 43.102849 | 7.703430 | 27.033150 | H | 24.753715 | 3.335223 | 42.405538 |
| H | 41.680978 | 6.242029 | 25.705679 | H | 20.412445 | 5.450602 | 39.619657 |
| H | 30.652517 | 3.575323 | 24.434438 | H | 22.023958 | 6.126098 | 37.946813 |
| H | 44.836620 | 1.962681 | 23.078815 | H | 18.216155 | 2.440741 | 37.897803 |
| H | 35.764112 | 6.972264 | 30.097390 | H | 18.232274 | 1.970527 | 35.485109 |
| H | 31.647797 | 4.412460 | 29.707649 | H | 16.998366 | 3.394197 | 33.939863 |
| H | 29.944146 | 3.747743 | 31.288601 | H | 15.246188 | 6.247223 | 38.395084 |
| H | 31.292311 | 6.861285 | 17.596307 | H | 14.005339 | 7.620193 | 36.827668 |
| H | 40.794664 | 5.815948 | 21.317941 | H | 13.169261 | 7.512551 | 42.644414 |
| H | 41.321203 | 2.318448 | 22.770628 | H | 26.720175 | 8.643271 | 41.703405 |

|   |           |          |           |   |           |          |           |
|---|-----------|----------|-----------|---|-----------|----------|-----------|
| H | 25.105491 | 6.950992 | 41.006562 | H | 30.501596 | 7.476204 | 33.638638 |
| H | 13.612010 | 3.634023 | 39.869049 | H | 38.788294 | 5.105172 | 37.656027 |
| H | 27.831856 | 1.810038 | 39.628732 | H | 39.711285 | 1.852576 | 39.529639 |
| H | 18.526456 | 6.986327 | 45.765669 | H | 52.223451 | 3.704667 | 43.946005 |
| H | 19.581991 | 7.539144 | 32.684909 | H | 54.659153 | 3.326950 | 44.019442 |
| H | 17.666269 | 6.772291 | 33.988163 | H | 56.055360 | 3.866336 | 42.061110 |
| H | 14.449266 | 4.517422 | 44.825578 | H | 51.374706 | 5.453233 | 39.579257 |
| H | 12.585380 | 3.790709 | 46.181069 | H | 52.752281 | 5.975808 | 37.680109 |
| H | 12.768692 | 3.686229 | 32.628065 | H | 49.599576 | 2.554878 | 38.022497 |
| H | 14.018198 | 7.249372 | 33.300885 | H | 49.702398 | 2.068856 | 35.615610 |
| H | 24.197622 | 6.230749 | 37.246476 | H | 48.448821 | 3.425318 | 34.025005 |
| H | 24.426696 | 2.250628 | 39.348611 | H | 46.452402 | 6.232036 | 38.406976 |
| H | 37.027526 | 3.597867 | 45.331783 | H | 45.202107 | 7.541766 | 36.794174 |
| H | 39.420249 | 2.884691 | 45.095809 | H | 44.272559 | 7.635775 | 42.278563 |
| H | 40.573704 | 3.081528 | 42.948999 | H | 44.818644 | 3.285062 | 40.162247 |
| H | 35.715433 | 4.959134 | 40.892803 | H | 49.669798 | 7.162560 | 45.839464 |
| H | 36.852744 | 5.218169 | 38.757201 | H | 50.737294 | 7.783703 | 32.653129 |
| H | 34.668812 | 2.827354 | 38.512748 | H | 48.907754 | 6.869975 | 33.987181 |
| H | 34.842945 | 2.279288 | 36.066765 | H | 45.670436 | 4.600204 | 44.843372 |
| H | 33.637926 | 3.605711 | 34.409050 | H | 43.782777 | 3.862728 | 46.163426 |
| H | 31.888097 | 6.761010 | 38.699556 | H | 44.261682 | 3.386437 | 32.708496 |
| H | 30.617960 | 8.065091 | 37.030348 | H | 45.322056 | 7.139141 | 33.272096 |
| H | 29.162034 | 8.092695 | 41.838907 | H | 54.726409 | 5.972193 | 36.665806 |
| H | 41.859151 | 8.040808 | 42.222007 | H | 9.463327  | 8.126887 | 58.063159 |
| H | 40.326871 | 6.319923 | 41.457607 | H | 7.916923  | 6.786658 | 56.693615 |
| H | 29.465431 | 3.490556 | 40.418141 | H | 10.728208 | 2.325481 | 54.106594 |
| H | 43.252530 | 1.615083 | 39.361507 | H | 7.191662  | 3.170551 | 53.803528 |
| H | 32.998608 | 7.285384 | 45.988677 | H | 19.459574 | 2.885610 | 59.354216 |
| H | 35.881669 | 7.607066 | 32.464936 | H | 21.840746 | 2.271728 | 59.400070 |
| H | 34.156662 | 6.883015 | 34.030594 | H | 23.326627 | 2.942412 | 57.582898 |
| H | 30.050194 | 3.593625 | 45.013608 | H | 18.869136 | 5.237920 | 55.149179 |
| H | 28.412462 | 2.299171 | 46.306480 | H | 20.362529 | 5.845352 | 53.347169 |
| H | 29.167966 | 3.716315 | 33.439800 | H | 16.873557 | 2.385382 | 53.523422 |

|   |           |          |           |   |           |          |           |
|---|-----------|----------|-----------|---|-----------|----------|-----------|
| H | 16.955627 | 1.919729 | 51.112477 | H | 32.792227 | 6.730120 | 61.410245 |
| H | 15.803877 | 3.373408 | 49.531899 | H | 32.528455 | 7.863843 | 48.383441 |
| H | 14.019214 | 6.290991 | 53.933529 | H | 30.960147 | 6.523609 | 49.693038 |
| H | 12.865228 | 7.697246 | 52.328671 | H | 28.748177 | 4.377653 | 60.399269 |
| H | 11.840772 | 7.508165 | 58.213059 | H | 26.897474 | 3.575017 | 61.718287 |
| H | 24.903533 | 7.698757 | 58.140506 | H | 27.540504 | 1.883015 | 48.315809 |
| H | 23.427989 | 6.264689 | 56.839216 | H | 27.431465 | 5.679583 | 49.006815 |
| H | 12.285203 | 3.636477 | 55.426628 | H | 38.045603 | 5.821582 | 52.421986 |
| H | 26.448257 | 1.918735 | 54.166063 | H | 38.603399 | 2.352775 | 53.914015 |
| H | 17.169098 | 6.737551 | 61.410741 | H | 50.894850 | 3.699973 | 59.506230 |
| H | 18.390274 | 7.529558 | 48.158404 | H | 53.331562 | 3.325509 | 59.581291 |
| H | 16.508930 | 6.745363 | 49.500884 | H | 54.727846 | 3.865736 | 57.623128 |
| H | 13.125092 | 4.379529 | 60.400334 | H | 50.047610 | 5.459328 | 55.145250 |
| H | 11.277308 | 3.575366 | 61.719136 | H | 51.424903 | 5.977059 | 53.243022 |
| H | 11.600526 | 3.638495 | 48.238019 | H | 48.356900 | 2.727798 | 53.463804 |
| H | 12.943138 | 7.299348 | 48.804998 | H | 48.431203 | 2.281761 | 51.049588 |
| H | 22.485387 | 5.903858 | 52.495608 | H | 47.099937 | 3.612234 | 49.504883 |
| H | 22.937476 | 2.351653 | 53.911522 | H | 45.128190 | 6.320296 | 53.959914 |
| H | 35.164969 | 2.966885 | 59.411723 | H | 43.809783 | 7.614348 | 52.388646 |
| H | 37.562468 | 2.425777 | 59.458312 | H | 42.880542 | 7.343285 | 58.231290 |
| H | 39.011103 | 3.062845 | 57.600654 | H | 43.609794 | 3.478792 | 55.376185 |
| H | 34.469651 | 5.137049 | 55.123359 | H | 48.405659 | 6.744429 | 61.407797 |
| H | 35.931083 | 5.721770 | 53.288760 | H | 49.464870 | 7.743800 | 48.219889 |
| H | 32.982168 | 2.513420 | 53.587123 | H | 47.568936 | 6.940942 | 49.530473 |
| H | 33.062698 | 1.963734 | 51.191133 | H | 44.381842 | 4.364054 | 60.399390 |
| H | 31.414026 | 2.891649 | 49.652858 | H | 42.519409 | 3.571537 | 61.717717 |
| H | 29.118730 | 5.392450 | 54.073581 | H | 42.760837 | 3.703858 | 48.202808 |
| H | 27.446571 | 6.237414 | 52.518508 | H | 43.859408 | 7.256183 | 48.861881 |
| H | 27.306184 | 7.213028 | 58.283414 | H | 53.398672 | 5.970785 | 52.227670 |
| H | 40.467234 | 7.766340 | 58.105355 | H | 17.068482 | 7.157600 | 63.836089 |
| H | 39.021085 | 6.300110 | 56.809549 | H | 15.148154 | 6.357150 | 65.155579 |
| H | 27.949369 | 3.302507 | 55.474229 | H | 10.263266 | 3.421560 | 63.797132 |
| H | 42.130642 | 2.041702 | 54.100473 | H | 32.689381 | 7.155911 | 63.835532 |

|   |           |           |           |                |           |           |           |
|---|-----------|-----------|-----------|----------------|-----------|-----------|-----------|
| H | 30.768303 | 6.356652  | 65.154796 | H              | 36.133156 | 8.530436  | 44.151304 |
| H | 25.882086 | 3.423707  | 63.795816 | H              | 33.964805 | 9.488662  | 40.759877 |
| H | 48.307538 | 7.159099  | 63.833755 | H              | 35.070392 | 10.136187 | 39.534083 |
| H | 46.387772 | 6.357310  | 65.153489 | H              | 36.502333 | 11.147908 | 41.291768 |
| H | 41.501260 | 3.425111  | 63.794454 | H              | 34.836434 | 11.693840 | 41.522646 |
| H | 54.922551 | 4.682795  | 55.325765 | H              | 34.457686 | 9.994435  | 43.296950 |
| H | 56.250084 | 4.683152  | 39.763698 | H              | 35.856194 | 11.009557 | 43.725430 |
| H | 57.578895 | 4.683436  | 24.200629 | H              | 36.919033 | 8.666389  | 40.421594 |
| H | 32.654269 | 5.043360  | 18.026533 | H              | 40.127920 | 10.251687 | 43.603599 |
| H | 17.034874 | 5.043623  | 18.026683 | H              | 41.907602 | 9.169406  | 44.937546 |
| H | 10.176555 | 4.915318  | 24.089629 | H              | 41.557076 | 6.882079  | 45.905397 |
| H | 8.848002  | 4.915621  | 39.653285 | H              | 39.373742 | 5.718965  | 45.501364 |
| H | 7.520559  | 4.915550  | 55.216452 | H              | 37.600945 | 6.775778  | 44.182925 |
| H | 12.998944 | 5.198984  | 65.269024 | H              | 37.993153 | 10.165507 | 42.705539 |
| H | 28.618796 | 5.198898  | 65.268170 | H              | 34.270501 | 5.861736  | 44.102766 |
| H | 44.238635 | 5.198851  | 65.267027 |                |           |           |           |
| H | 48.273907 | 5.043129  | 18.026067 |                |           |           |           |
| C | 36.327567 | 8.965065  | 43.155176 | (S,S)-1-Int3-2 |           |           |           |
| C | 35.821930 | 7.903105  | 42.116146 | C              | 12.487000 | 7.261000  | 26.395000 |
| C | 35.864277 | 8.460688  | 40.685057 | C              | 11.616000 | 6.503000  | 25.622000 |
| C | 35.024921 | 9.738965  | 40.564357 | C              | 12.086000 | 5.395000  | 24.927000 |
| C | 35.486843 | 10.801373 | 41.573034 | C              | 13.428000 | 5.043000  | 25.007000 |
| C | 35.491790 | 10.249052 | 43.009341 | C              | 13.027000 | 3.179000  | 23.539000 |
| O | 34.550472 | 7.563508  | 42.532201 | C              | 11.685000 | 3.529000  | 23.460000 |
| C | 38.725736 | 8.603639  | 43.785087 | C              | 11.215000 | 4.638000  | 24.154000 |
| C | 39.963723 | 9.248747  | 44.015206 | O              | 10.782000 | 2.793000  | 22.654000 |
| C | 40.963576 | 8.638365  | 44.772051 | Cu             | 18.540281 | 6.076179  | 26.028925 |
| C | 40.769418 | 7.363243  | 45.317562 | Cu             | 17.945814 | 3.686048  | 26.527192 |
| C | 39.548907 | 6.718848  | 45.093418 | C              | 22.213190 | 3.945125  | 26.392919 |
| C | 38.534732 | 7.318887  | 44.342618 | C              | 22.745410 | 3.159120  | 27.430902 |
| N | 37.746717 | 9.240066  | 43.037660 | C              | 24.101197 | 2.858556  | 27.475102 |
| H | 35.490809 | 7.683928  | 39.995471 | C              | 24.950198 | 3.332168  | 26.480126 |
| H | 36.503510 | 7.029490  | 42.184066 | C              | 24.456353 | 4.094202  | 25.404303 |
|   |           |           |           | C              | 23.067923 | 4.388199  | 25.343836 |

|   |           |          |           |    |           |          |           |
|---|-----------|----------|-----------|----|-----------|----------|-----------|
| C | 22.567174 | 5.081875 | 24.221028 | O  | 16.595917 | 6.397963 | 25.859921 |
| C | 23.427373 | 5.514684 | 23.216852 | O  | 16.051330 | 4.257737 | 26.320266 |
| C | 24.795135 | 5.268042 | 23.296489 | C  | 15.734294 | 5.457694 | 25.988815 |
| C | 25.320890 | 4.548016 | 24.377552 | C  | 17.914041 | 5.774339 | 30.248862 |
| O | 25.642599 | 5.701587 | 22.282751 | C  | 18.896404 | 6.551155 | 30.889907 |
| O | 20.429964 | 5.509839 | 26.204740 | C  | 16.785500 | 5.324879 | 30.991699 |
| O | 19.909578 | 3.359643 | 26.647139 | C  | 15.714481 | 4.642907 | 30.375601 |
| C | 20.765119 | 4.291331 | 26.423821 | C  | 14.630502 | 4.203196 | 31.129394 |
| C | 18.226927 | 4.022014 | 22.293999 | O  | 18.423149 | 6.381477 | 27.994685 |
| C | 18.992915 | 2.941012 | 21.873981 | O  | 17.894520 | 4.232548 | 28.432493 |
| C | 19.081890 | 2.638017 | 20.519979 | C  | 18.091643 | 5.443788 | 28.807116 |
| C | 18.404876 | 3.417023 | 19.587993 | Cu | 34.177000 | 6.091014 | 26.027421 |
| C | 17.639888 | 4.497024 | 20.008011 | Cu | 33.596631 | 3.707613 | 26.567866 |
| C | 17.550913 | 4.800019 | 21.362013 | C  | 37.851829 | 3.930117 | 26.376498 |
| C | 16.783924 | 5.881020 | 21.784030 | C  | 38.374657 | 3.205792 | 27.463655 |
| C | 16.107910 | 6.659026 | 20.850045 | C  | 39.716239 | 2.850040 | 27.506164 |
| C | 16.197885 | 6.355031 | 19.497042 | C  | 40.560567 | 3.205759 | 26.460780 |
| C | 16.963875 | 5.274030 | 19.076025 | C  | 40.076726 | 3.909450 | 25.341240 |
| O | 15.523872 | 7.185037 | 18.539057 | C  | 38.701113 | 4.260434 | 25.284437 |
| O | 18.564576 | 5.526605 | 24.119459 | C  | 38.206723 | 4.897694 | 24.127296 |
| O | 18.017064 | 3.384943 | 24.571889 | C  | 39.063025 | 5.213443 | 23.076605 |
| C | 18.262863 | 4.334964 | 23.747257 | C  | 40.421922 | 4.915550 | 23.150858 |
| C | 14.301000 | 5.801000 | 25.782000 | C  | 40.941434 | 4.257054 | 24.274067 |
| C | 13.829000 | 6.909000 | 26.476000 | O  | 41.266663 | 5.244546 | 22.096571 |
| C | 28.007340 | 7.156775 | 26.492035 | O  | 36.077860 | 5.512013 | 26.140301 |
| C | 27.160782 | 6.291736 | 25.806687 | O  | 35.553895 | 3.378775 | 26.655895 |
| C | 27.662243 | 5.158135 | 25.134642 | C  | 36.409904 | 4.297764 | 26.395382 |
| C | 29.058123 | 4.896036 | 25.176217 | C  | 33.846854 | 4.021972 | 22.293718 |
| C | 13.900000 | 3.935000 | 24.313000 | C  | 34.612831 | 2.940969 | 21.873683 |
| C | 28.712138 | 2.971775 | 23.735315 | C  | 34.701781 | 2.637978 | 20.519678 |
| C | 27.345474 | 3.191906 | 23.720227 | C  | 34.024753 | 3.416989 | 19.587708 |
| C | 26.795627 | 4.289521 | 24.419865 | C  | 33.259776 | 4.496991 | 20.007741 |
| O | 26.569463 | 2.282754 | 23.004161 | C  | 33.170826 | 4.799983 | 21.361747 |



|    |           |          |           |   |           |          |           |
|----|-----------|----------|-----------|---|-----------|----------|-----------|
| C  | 32.403848 | 5.880986 | 21.783781 | C | 54.157058 | 3.947774 | 27.515902 |
| C  | 31.727821 | 6.658997 | 20.849810 | C | 55.530059 | 3.732759 | 27.559826 |
| C  | 31.817771 | 6.355005 | 19.496805 | C | 56.316002 | 4.036762 | 26.454787 |
| C  | 32.583748 | 5.274002 | 19.075771 | C | 55.729946 | 4.554780 | 25.305823 |
| O  | 31.143743 | 7.185016 | 18.538835 | C | 54.356947 | 4.768795 | 25.262899 |
| O  | 34.147995 | 5.536204 | 24.120586 | C | 53.770890 | 5.287813 | 24.113936 |
| O  | 33.638412 | 3.392171 | 24.595813 | C | 54.557834 | 5.591815 | 23.007897 |
| C  | 33.870122 | 4.337381 | 23.756430 | C | 55.929834 | 5.377800 | 23.052821 |
| C  | 29.910329 | 5.753889 | 25.926108 | C | 56.515889 | 4.858782 | 24.200784 |
| C  | 29.369298 | 6.891945 | 26.550507 | O | 56.643771 | 5.617805 | 21.841785 |
| C  | 43.533786 | 6.819243 | 26.538781 | O | 51.626947 | 5.823624 | 26.134005 |
| C  | 42.721726 | 5.969037 | 25.799365 | O | 51.342478 | 3.638565 | 26.622030 |
| C  | 43.255849 | 4.857109 | 25.115009 | C | 52.091907 | 4.653930 | 26.378695 |
| C  | 44.653477 | 4.606626 | 25.192884 | C | 49.466779 | 4.021876 | 22.293156 |
| C  | 29.568503 | 3.806923 | 24.440892 | C | 50.232745 | 2.940872 | 21.873104 |
| C  | 44.366400 | 2.707296 | 23.708619 | C | 50.321669 | 2.637885 | 20.519096 |
| C  | 42.999431 | 2.924943 | 23.644255 | C | 49.644627 | 3.416901 | 19.587140 |
| C  | 42.418489 | 4.003931 | 24.348112 | C | 48.879661 | 4.496905 | 20.007192 |
| O  | 42.253770 | 2.024832 | 22.886115 | C | 48.790737 | 4.799893 | 21.361200 |
| O  | 32.209287 | 6.412823 | 25.940459 | C | 48.023772 | 5.880897 | 21.783251 |
| O  | 31.702515 | 4.266515 | 26.411548 | C | 47.347731 | 6.658913 | 20.849295 |
| C  | 31.359809 | 5.462980 | 26.101869 | C | 47.437655 | 6.354926 | 19.496287 |
| C  | 33.783705 | 5.849859 | 30.270491 | C | 48.203620 | 5.273922 | 19.075235 |
| C  | 34.918316 | 6.432713 | 30.863124 | O | 46.763613 | 7.184943 | 18.538331 |
| C  | 32.604466 | 5.673818 | 31.045504 | O | 49.721937 | 5.581260 | 24.099945 |
| C  | 31.423395 | 5.150399 | 30.482628 | O | 49.392743 | 3.408133 | 24.598363 |
| C  | 30.274635 | 5.018224 | 31.258713 | C | 49.523446 | 4.360405 | 23.749565 |
| O  | 34.146748 | 6.411468 | 27.989118 | C | 45.474952 | 5.469663 | 25.969199 |
| O  | 33.588639 | 4.280169 | 28.478857 | C | 44.896535 | 6.575402 | 26.619103 |
| C  | 33.845332 | 5.489372 | 28.828072 | C | 45.194597 | 3.531343 | 24.461416 |
| Cu | 49.681887 | 6.175059 | 25.999661 | O | 47.703179 | 6.290627 | 25.900474 |
| Cu | 49.351264 | 3.747786 | 26.553457 | O | 47.397625 | 4.114888 | 26.411326 |
| C  | 53.571003 | 4.464792 | 26.367939 | C | 46.944723 | 5.275300 | 26.096899 |

|    |           |          |           |   |           |          |           |
|----|-----------|----------|-----------|---|-----------|----------|-----------|
| C  | 49.164171 | 5.899654 | 30.228635 | C | 17.505942 | 2.773549 | 37.314371 |
| C  | 50.076752 | 6.763975 | 30.859646 | C | 17.536897 | 2.513090 | 35.950439 |
| C  | 48.066877 | 5.378440 | 30.970196 | C | 16.897214 | 3.374041 | 35.064409 |
| C  | 47.061748 | 4.598023 | 30.359336 | C | 16.182949 | 4.499069 | 35.525559 |
| C  | 46.007936 | 4.089277 | 31.111742 | C | 16.133342 | 4.755979 | 36.921834 |
| O  | 49.586017 | 6.510395 | 27.959982 | C | 15.358802 | 5.836753 | 37.389225 |
| O  | 49.299473 | 4.326264 | 28.448773 | C | 14.693199 | 6.663404 | 36.493422 |
| C  | 49.370740 | 5.559526 | 28.795176 | C | 14.766993 | 6.449282 | 35.127338 |
| C  | 11.158286 | 7.260970 | 41.959133 | C | 15.518409 | 5.366020 | 34.618087 |
| C  | 10.287269 | 6.502976 | 41.186145 | O | 14.092066 | 7.354717 | 34.311252 |
| C  | 10.757253 | 5.394976 | 40.491133 | O | 17.237922 | 5.375158 | 39.640584 |
| C  | 12.099253 | 5.042971 | 40.571108 | O | 16.635283 | 3.251944 | 40.106712 |
| C  | 11.698221 | 3.178978 | 39.103109 | C | 16.909201 | 4.190521 | 39.274379 |
| C  | 10.356221 | 3.528983 | 39.024134 | C | 12.972270 | 5.800966 | 41.346096 |
| C  | 9.886237  | 4.637982 | 39.718146 | C | 12.500286 | 6.908965 | 42.040108 |
| O  | 9.453204  | 2.792989 | 38.218147 | C | 26.045799 | 7.053880 | 42.292029 |
| Cu | 17.244066 | 5.938651 | 41.541562 | C | 25.401828 | 6.016097 | 41.651709 |
| Cu | 16.558366 | 3.580342 | 42.072831 | C | 26.115899 | 4.917635 | 41.068986 |
| C  | 20.822450 | 3.665470 | 42.073018 | C | 27.549873 | 4.913365 | 41.214230 |
| C  | 21.302206 | 3.064363 | 43.250395 | C | 12.571237 | 3.934972 | 39.877096 |
| C  | 22.649769 | 2.757673 | 43.395270 | C | 27.654421 | 2.831544 | 39.962552 |
| C  | 23.541047 | 3.046888 | 42.367078 | C | 26.243235 | 2.836884 | 39.790139 |
| C  | 23.097168 | 3.618387 | 41.160341 | C | 25.470411 | 3.856371 | 40.335916 |
| C  | 21.716181 | 3.902938 | 40.995635 | O | 25.781777 | 1.771917 | 39.070489 |
| C  | 21.261911 | 4.399851 | 39.757368 | O | 15.299633 | 6.341250 | 41.393015 |
| C  | 22.162501 | 4.629509 | 38.721292 | O | 14.690166 | 4.222985 | 41.868506 |
| C  | 23.526526 | 4.410294 | 38.901725 | C | 14.405983 | 5.432298 | 41.543965 |
| C  | 24.005785 | 3.918845 | 40.121325 | C | 16.634062 | 5.738188 | 45.759813 |
| O  | 24.415939 | 4.668928 | 37.866743 | C | 17.664002 | 6.473063 | 46.375522 |
| O  | 19.114391 | 5.284345 | 41.716106 | C | 18.808735 | 6.835864 | 32.246666 |
| O  | 18.497789 | 3.172913 | 42.223562 | C | 17.735835 | 6.354216 | 32.988711 |
| C  | 19.393030 | 4.064213 | 42.003841 | C | 16.712146 | 5.600545 | 32.383458 |
| C  | 16.836462 | 3.903277 | 37.816704 | C | 15.477610 | 5.390953 | 46.512489 |

|    |           |          |           |   |           |          |           |
|----|-----------|----------|-----------|---|-----------|----------|-----------|
| C  | 14.370009 | 4.748838 | 45.919179 | C | 31.382272 | 6.338385 | 34.609686 |
| C  | 13.260369 | 4.405079 | 46.685209 | O | 31.031434 | 8.719486 | 34.093138 |
| C  | 14.579630 | 4.429260 | 32.502474 | O | 32.442120 | 6.241824 | 39.866020 |
| C  | 15.607607 | 5.136495 | 33.140055 | O | 31.829684 | 4.173572 | 40.343803 |
| O  | 13.487851 | 3.988665 | 33.242317 | C | 31.995115 | 5.098748 | 39.493757 |
| O  | 17.157697 | 6.273064 | 43.498676 | C | 28.186844 | 6.024827 | 41.853309 |
| O  | 16.523528 | 4.160383 | 43.972580 | C | 27.452143 | 7.079565 | 42.366467 |
| C  | 16.784211 | 5.366742 | 44.326477 | C | 42.167377 | 6.789359 | 41.528857 |
| Cu | 31.969176 | 7.862518 | 41.384085 | C | 41.424027 | 5.855063 | 40.818789 |
| Cu | 32.300143 | 4.935391 | 42.108927 | C | 42.019540 | 4.691886 | 40.293593 |
| C  | 36.474829 | 4.128723 | 41.103525 | C | 43.412827 | 4.481741 | 40.491049 |
| C  | 36.824666 | 3.563090 | 42.321207 | C | 28.290698 | 3.835222 | 40.646843 |
| C  | 38.137514 | 3.111513 | 42.553707 | C | 43.250039 | 2.437819 | 39.187742 |
| C  | 39.101523 | 3.255865 | 41.581264 | C | 41.886568 | 2.610895 | 39.026004 |
| C  | 38.804497 | 3.818182 | 40.297869 | C | 41.254193 | 3.752146 | 39.557338 |
| C  | 37.442278 | 4.217719 | 40.034373 | O | 41.198799 | 1.613498 | 38.339935 |
| C  | 37.129897 | 4.658146 | 38.716937 | O | 30.139438 | 7.225323 | 41.403092 |
| C  | 38.099941 | 4.770021 | 37.749536 | O | 30.363009 | 5.214816 | 42.384555 |
| C  | 39.456858 | 4.476831 | 38.033442 | C | 29.675155 | 6.158550 | 41.884056 |
| C  | 39.815340 | 3.989381 | 39.290421 | C | 32.142587 | 7.099272 | 45.655852 |
| O  | 40.405582 | 4.660783 | 37.074914 | C | 32.833111 | 8.129223 | 46.266188 |
| O  | 34.904684 | 5.568428 | 40.072655 | C | 34.916216 | 6.798996 | 32.202690 |
| O  | 34.239962 | 4.414871 | 41.874042 | C | 33.772447 | 6.612604 | 32.970734 |
| C  | 35.112348 | 4.707643 | 41.034389 | C | 32.600543 | 6.069665 | 32.411365 |
| C  | 31.790751 | 4.779042 | 38.055274 | C | 31.272542 | 6.245135 | 46.411889 |
| C  | 31.867691 | 3.431179 | 37.721462 | C | 30.481365 | 5.235829 | 45.794152 |
| C  | 31.815437 | 3.023927 | 36.376841 | C | 29.617485 | 4.464951 | 46.534590 |
| C  | 31.676578 | 3.961156 | 35.374995 | C | 30.268987 | 5.401485 | 32.598694 |
| C  | 31.553060 | 5.359984 | 35.651839 | C | 31.423607 | 5.932546 | 33.183563 |
| C  | 31.607653 | 5.776369 | 37.034134 | O | 29.113168 | 5.268065 | 33.357232 |
| C  | 31.450129 | 7.163161 | 37.323807 | O | 32.100065 | 7.843565 | 43.404858 |
| C  | 31.253290 | 8.075095 | 36.318366 | O | 32.698732 | 5.718918 | 43.830751 |
| C  | 31.220119 | 7.677259 | 34.955485 | C | 32.317881 | 6.881350 | 44.182001 |

|    |           |          |           |    |           |          |           |
|----|-----------|----------|-----------|----|-----------|----------|-----------|
| Cu | 48.363003 | 6.210281 | 41.517833 | O  | 46.381014 | 6.312426 | 41.357308 |
| Cu | 48.029932 | 3.777239 | 42.046052 | O  | 46.083862 | 4.130221 | 41.837053 |
| C  | 52.242278 | 4.464620 | 41.931334 | C  | 45.629196 | 5.280392 | 41.493930 |
| C  | 52.828353 | 3.947597 | 43.079285 | C  | 47.816302 | 5.925350 | 45.737060 |
| C  | 54.201353 | 3.732577 | 43.123183 | C  | 48.761539 | 6.769105 | 46.349055 |
| C  | 54.987278 | 4.036581 | 42.018131 | C  | 49.952134 | 7.070475 | 32.208819 |
| C  | 54.401203 | 4.554604 | 40.869180 | C  | 48.910633 | 6.523812 | 32.951168 |
| C  | 53.028203 | 4.768624 | 40.826281 | C  | 47.956060 | 5.678201 | 32.353694 |
| C  | 52.442128 | 5.287648 | 39.677330 | C  | 46.706718 | 5.455241 | 46.492360 |
| C  | 53.229054 | 5.591652 | 38.571278 | C  | 45.680213 | 4.687697 | 45.903186 |
| C  | 54.601054 | 5.377632 | 38.616177 | C  | 44.608559 | 4.237978 | 46.668849 |
| C  | 55.187129 | 4.858609 | 39.764128 | C  | 45.924102 | 4.339779 | 32.478601 |
| O  | 55.314970 | 5.617639 | 37.405129 | C  | 46.884255 | 5.142084 | 33.109748 |
| O  | 50.308892 | 5.847734 | 41.696179 | O  | 44.865422 | 3.824809 | 33.218432 |
| O  | 50.010706 | 3.663436 | 42.179924 | O  | 48.226448 | 6.529713 | 43.472854 |
| C  | 50.766121 | 4.673447 | 41.943803 | O  | 47.913733 | 4.346228 | 43.948712 |
| C  | 48.269442 | 4.134440 | 37.794110 | C  | 47.999492 | 5.577990 | 44.302125 |
| C  | 49.084103 | 3.099959 | 37.301291 | C  | 9.830848  | 7.260896 | 57.522290 |
| C  | 49.145401 | 2.829297 | 35.940902 | C  | 8.959816  | 6.502907 | 56.749315 |
| C  | 48.393394 | 3.585919 | 35.048510 | C  | 9.429783  | 5.394908 | 56.054291 |
| C  | 47.541585 | 4.615752 | 35.499398 | C  | 10.771783 | 5.042898 | 56.134241 |
| C  | 47.460819 | 4.879766 | 36.892571 | C  | 10.370718 | 3.178911 | 54.666243 |
| C  | 46.553097 | 5.856428 | 37.349894 | C  | 9.028718  | 3.528920 | 54.587293 |
| C  | 45.787679 | 6.582363 | 36.446610 | C  | 8.558750  | 4.637919 | 55.281317 |
| C  | 45.887645 | 6.364812 | 35.082873 | O  | 8.125684  | 2.792932 | 53.781319 |
| C  | 46.770268 | 5.380013 | 34.584225 | Cu | 15.891831 | 6.147556 | 57.137137 |
| O  | 45.105897 | 7.171305 | 34.258233 | Cu | 15.346574 | 3.731335 | 57.550947 |
| O  | 48.449644 | 5.651222 | 39.617451 | C  | 19.601582 | 4.063134 | 57.422580 |
| O  | 48.151341 | 3.463879 | 40.082034 | C  | 20.159655 | 3.288656 | 58.455418 |
| C  | 48.294405 | 4.431653 | 39.250635 | C  | 21.514059 | 2.979615 | 58.463049 |
| C  | 44.166299 | 5.432513 | 41.240612 | C  | 22.334716 | 3.430975 | 57.434770 |
| C  | 43.523179 | 6.582043 | 41.735610 | C  | 21.814304 | 4.185169 | 56.365648 |
| C  | 44.017907 | 3.358193 | 39.891686 | C  | 20.427419 | 4.491780 | 56.345586 |

|   |           |          |           |    |           |          |           |
|---|-----------|----------|-----------|----|-----------|----------|-----------|
| C | 19.898357 | 5.183893 | 55.235331 | O  | 13.936840 | 6.435490 | 56.976582 |
| C | 20.730125 | 5.596003 | 54.198850 | O  | 13.437784 | 4.272344 | 57.370930 |
| C | 22.097600 | 5.336063 | 54.237395 | C  | 13.091848 | 5.476552 | 57.086293 |
| C | 22.651419 | 4.622270 | 55.308924 | C  | 15.283046 | 5.695821 | 61.352095 |
| O | 22.917197 | 5.756051 | 53.195706 | C  | 16.314087 | 6.385804 | 61.978046 |
| O | 17.795448 | 5.611276 | 57.299226 | C  | 17.589030 | 6.821806 | 47.717335 |
| O | 17.312628 | 3.437504 | 57.665040 | C  | 16.482121 | 6.446302 | 48.469535 |
| C | 18.151035 | 4.390806 | 57.475095 | C  | 15.416842 | 5.730068 | 47.890414 |
| C | 15.647263 | 4.234495 | 53.326158 | C  | 14.198081 | 5.242825 | 62.095148 |
| C | 16.358489 | 3.131969 | 52.819917 | C  | 13.166040 | 4.552842 | 61.469196 |
| C | 16.380124 | 2.861768 | 51.459234 | C  | 12.083075 | 4.099846 | 62.213249 |
| C | 15.686595 | 3.683947 | 50.579062 | C  | 13.222012 | 4.686220 | 48.048523 |
| C | 14.942203 | 4.789478 | 51.041628 | C  | 14.287510 | 5.359575 | 48.661393 |
| C | 14.908257 | 5.060732 | 52.435856 | O  | 12.109545 | 4.330435 | 48.802982 |
| C | 14.108519 | 6.122266 | 52.904577 | O  | 15.757154 | 6.383341 | 59.110777 |
| C | 13.403556 | 6.918326 | 52.010712 | O  | 15.283514 | 4.208989 | 59.476845 |
| C | 13.456896 | 6.687907 | 50.646093 | C  | 15.447086 | 5.412609 | 59.892689 |
| C | 14.228473 | 5.618997 | 50.136462 | Cu | 31.473522 | 6.227338 | 57.141409 |
| O | 12.746106 | 7.567003 | 49.831704 | Cu | 30.968252 | 3.794601 | 57.505230 |
| O | 15.943226 | 5.668673 | 55.209028 | C  | 35.209716 | 4.162779 | 57.441903 |
| O | 15.439045 | 3.501148 | 55.579959 | C  | 35.746535 | 3.421402 | 58.510229 |
| C | 15.679103 | 4.483776 | 54.791068 | C  | 37.090301 | 3.072189 | 58.532895 |
| C | 11.644816 | 5.800887 | 56.909216 | C  | 37.921013 | 3.446465 | 57.482975 |
| C | 11.172849 | 6.908886 | 57.603240 | C  | 37.422903 | 4.170081 | 56.382212 |
| C | 25.308839 | 7.136958 | 57.559264 | C  | 36.047236 | 4.524123 | 56.351040 |
| C | 24.474978 | 6.308827 | 56.817300 | C  | 35.539714 | 5.193041 | 55.217778 |
| C | 24.988616 | 5.214601 | 56.091049 | C  | 36.382033 | 5.528726 | 54.162072 |
| C | 26.386303 | 4.958812 | 56.128612 | C  | 37.739591 | 5.219175 | 54.207498 |
| C | 11.243751 | 3.934900 | 55.440217 | C  | 38.272531 | 4.532611 | 55.307575 |
| C | 26.061498 | 3.115901 | 54.581213 | O  | 38.569882 | 5.565422 | 53.147569 |
| C | 24.692642 | 3.326523 | 54.570650 | O  | 33.392142 | 5.705458 | 57.278742 |
| C | 24.130742 | 4.379598 | 55.327248 | O  | 32.929572 | 3.525439 | 57.635203 |
| O | 23.926339 | 2.446257 | 53.809553 | C  | 33.758686 | 4.487527 | 57.460695 |

|   |           |          |           |    |           |          |           |
|---|-----------|----------|-----------|----|-----------|----------|-----------|
| C | 31.366325 | 4.387547 | 53.284065 | C  | 29.818167 | 5.242646 | 62.094340 |
| C | 32.196851 | 3.366188 | 52.789347 | C  | 28.786113 | 4.552669 | 61.468405 |
| C | 32.350246 | 3.170353 | 51.423056 | C  | 27.703159 | 4.099675 | 62.212476 |
| C | 31.667209 | 3.982466 | 50.524020 | C  | 29.493490 | 4.644773 | 47.938026 |
| C | 30.790332 | 4.989942 | 50.971863 | C  | 30.246353 | 5.619983 | 48.591814 |
| C | 30.632976 | 5.193991 | 52.370623 | O  | 28.626439 | 3.867253 | 48.644511 |
| C | 29.727140 | 6.174906 | 52.818665 | O  | 31.357342 | 6.420632 | 59.119403 |
| C | 29.022860 | 6.948107 | 51.903031 | O  | 30.887903 | 4.239154 | 59.444201 |
| C | 29.182940 | 6.773365 | 50.538384 | C  | 31.054470 | 5.434937 | 59.884298 |
| C | 30.071674 | 5.793208 | 50.052529 | Cu | 47.054976 | 6.254820 | 57.148490 |
| O | 28.440208 | 7.603990 | 49.703637 | Cu | 46.686404 | 3.799208 | 57.530240 |
| O | 31.520910 | 5.795699 | 55.200866 | C  | 50.914829 | 4.464394 | 57.493750 |
| O | 31.089168 | 3.605290 | 55.523420 | C  | 51.500923 | 3.947364 | 58.641689 |
| C | 31.316343 | 4.609315 | 54.755916 | C  | 52.873923 | 3.732339 | 58.685563 |
| C | 27.226615 | 5.780264 | 56.930816 | C  | 53.659830 | 4.036343 | 57.580498 |
| C | 26.670784 | 6.876390 | 57.615298 | C  | 53.073736 | 4.554373 | 56.431559 |
| C | 40.926398 | 6.979329 | 57.625347 | C  | 51.700736 | 4.768398 | 56.388685 |
| C | 40.095896 | 6.171024 | 56.860914 | C  | 51.114643 | 5.287428 | 55.239746 |
| C | 40.606872 | 5.076488 | 56.132446 | C  | 51.901549 | 5.591433 | 54.133681 |
| C | 42.001589 | 4.802982 | 56.186426 | C  | 53.273549 | 5.377407 | 54.178555 |
| C | 26.908553 | 3.915244 | 55.338637 | C  | 53.859642 | 4.858378 | 55.326493 |
| C | 41.671169 | 2.966181 | 54.634403 | O  | 53.987445 | 5.617415 | 52.967495 |
| C | 40.306054 | 3.201228 | 54.598376 | O  | 48.994042 | 5.860820 | 57.300858 |
| C | 39.748116 | 4.261408 | 55.348313 | O  | 48.671848 | 3.657049 | 57.668273 |
| O | 39.538327 | 2.332930 | 53.825219 | C  | 49.438464 | 4.673446 | 57.497957 |
| O | 29.504023 | 6.489830 | 57.012374 | C  | 46.981538 | 4.362580 | 53.313838 |
| O | 29.056578 | 4.301841 | 57.325317 | C  | 47.811285 | 3.343509 | 52.812530 |
| C | 28.681498 | 5.507517 | 57.095241 | C  | 47.867135 | 3.073515 | 51.452876 |
| C | 30.903120 | 5.695641 | 61.351269 | C  | 47.090473 | 3.811898 | 50.568121 |
| C | 31.934175 | 6.385618 | 61.977205 | C  | 46.229671 | 4.832168 | 51.024674 |
| C | 32.735083 | 8.310013 | 47.665017 | C  | 46.163895 | 5.104126 | 52.418139 |
| C | 31.925835 | 7.492641 | 48.425359 | C  | 45.257297 | 6.078033 | 52.880829 |
| C | 31.145270 | 6.446112 | 47.833682 | C  | 44.473281 | 6.790273 | 51.981879 |

|   |           |          |           |   |           |          |           |
|---|-----------|----------|-----------|---|-----------|----------|-----------|
| C | 44.550376 | 6.558320 | 50.618290 | C | 30.799322 | 6.168606 | 64.089282 |
| C | 45.432197 | 5.575295 | 50.114092 | C | 29.767267 | 5.478629 | 63.464346 |
| O | 43.753376 | 7.354839 | 49.798969 | C | 27.651260 | 4.336658 | 63.581482 |
| O | 47.127653 | 5.806508 | 55.210578 | C | 28.683314 | 5.025635 | 64.206417 |
| O | 46.815749 | 3.599413 | 55.559210 | O | 26.563309 | 3.908663 | 64.360554 |
| C | 46.973045 | 4.606203 | 54.780452 | C | 47.502389 | 6.620356 | 63.345091 |
| C | 42.842026 | 5.619897 | 56.992048 | C | 46.419447 | 6.168363 | 64.088179 |
| C | 42.284660 | 6.708769 | 57.688461 | C | 45.387379 | 5.478391 | 63.463260 |
| C | 42.519735 | 3.751987 | 55.405067 | C | 43.271369 | 4.336426 | 63.580429 |
| O | 45.082862 | 6.407783 | 57.019128 | C | 44.303437 | 5.025398 | 64.205349 |
| O | 44.741768 | 4.202351 | 57.345331 | O | 42.183431 | 3.908432 | 64.359519 |
| C | 44.308098 | 5.390746 | 57.118775 | H | 12.119193 | 8.126959 | 26.935907 |
| C | 46.523195 | 5.695406 | 61.350162 | H | 10.573009 | 6.786780 | 25.566456 |
| C | 47.554262 | 6.385378 | 61.976082 | H | 13.383801 | 2.323529 | 22.982139 |
| C | 48.650630 | 7.112104 | 47.689817 | H | 9.847454  | 3.169754 | 22.676953 |
| C | 47.589543 | 6.624522 | 48.443612 | H | 22.098576 | 2.792914 | 28.220108 |
| C | 46.606782 | 5.796256 | 47.867786 | H | 24.498460 | 2.259883 | 28.288940 |
| C | 45.438253 | 5.242413 | 62.093251 | H | 26.001087 | 3.084842 | 26.548844 |
| C | 44.406185 | 4.552442 | 61.467332 | H | 21.509859 | 5.286234 | 24.091925 |
| C | 43.323243 | 4.099449 | 62.211421 | H | 23.019568 | 6.048001 | 22.368831 |
| C | 44.532595 | 4.530633 | 48.028671 | H | 19.531773 | 2.329351 | 22.589970 |
| C | 45.520577 | 5.315220 | 48.639581 | H | 19.679290 | 1.794053 | 20.190507 |
| O | 43.458504 | 4.071154 | 48.782267 | H | 18.480471 | 3.170812 | 18.536728 |
| O | 46.922941 | 6.445694 | 59.123314 | H | 16.652494 | 6.145579 | 22.827240 |
| O | 46.571234 | 4.241837 | 59.459065 | H | 15.507065 | 7.501117 | 21.165185 |
| C | 46.674885 | 5.445686 | 59.889737 | H | 14.495422 | 7.507674 | 27.088211 |
| C | 16.262162 | 6.620790 | 63.347051 | H | 27.602743 | 8.033605 | 26.987832 |
| C | 15.179196 | 6.168795 | 64.090104 | H | 26.105921 | 6.526997 | 25.789361 |
| C | 14.147156 | 5.478812 | 63.465153 | H | 14.941619 | 3.634586 | 24.310199 |
| C | 12.031150 | 4.336833 | 63.582254 | H | 29.112028 | 2.134260 | 23.179464 |
| C | 13.063191 | 5.025817 | 64.207206 | H | 19.746049 | 6.922807 | 30.328377 |
| O | 10.943187 | 3.908837 | 64.361307 | H | 15.687819 | 4.454478 | 29.307743 |
| C | 31.882275 | 6.620600 | 63.346211 | H | 13.823569 | 3.680139 | 30.634325 |

|   |           |          |           |   |           |          |           |
|---|-----------|----------|-----------|---|-----------|----------|-----------|
| H | 15.671940 | 6.861193 | 17.596352 | H | 46.741435 | 7.496983 | 21.164875 |
| H | 25.154448 | 6.226893 | 21.573023 | H | 45.516957 | 7.253832 | 27.193757 |
| H | 25.588187 | 2.503321 | 23.019240 | H | 46.256986 | 3.316014 | 24.448204 |
| H | 37.729573 | 2.923017 | 28.287806 | H | 50.899304 | 7.189444 | 30.296076 |
| H | 40.105276 | 2.296133 | 28.354902 | H | 47.064183 | 4.381611 | 29.296585 |
| H | 41.599653 | 2.912541 | 26.526342 | H | 45.251742 | 3.491693 | 30.620892 |
| H | 37.157656 | 5.149807 | 24.011833 | H | 46.913432 | 6.862109 | 17.595714 |
| H | 38.660913 | 5.703683 | 22.200319 | H | 56.056195 | 5.977057 | 21.104086 |
| H | 35.149746 | 2.329217 | 22.590824 | H | 10.790632 | 8.127009 | 42.499923 |
| H | 35.298682 | 1.793659 | 20.190313 | H | 9.244380  | 6.786878 | 41.130268 |
| H | 34.100002 | 3.170666 | 18.536477 | H | 12.055777 | 2.325928 | 38.542885 |
| H | 32.263784 | 6.143240 | 22.826019 | H | 8.519401  | 3.171276 | 38.239590 |
| H | 31.124626 | 7.499402 | 21.165138 | H | 20.623084 | 2.856202 | 44.069436 |
| H | 30.013394 | 7.566618 | 27.102752 | H | 23.009223 | 2.307558 | 44.315550 |
| H | 43.103971 | 7.676266 | 27.047870 | H | 24.586658 | 2.808285 | 42.516192 |
| H | 41.667252 | 6.200184 | 25.753309 | H | 20.210880 | 4.603118 | 39.571827 |
| H | 30.629165 | 3.591344 | 24.383162 | H | 21.790968 | 5.002146 | 37.776001 |
| H | 44.788725 | 1.879374 | 23.155029 | H | 18.021859 | 2.102151 | 37.991103 |
| H | 35.813999 | 6.596638 | 30.274488 | H | 18.066417 | 1.642863 | 35.575529 |
| H | 31.370486 | 4.844197 | 29.441648 | H | 16.948096 | 3.141913 | 34.009951 |
| H | 29.379786 | 4.613144 | 30.805235 | H | 15.242452 | 6.052451 | 38.445256 |
| H | 31.292131 | 6.861252 | 17.596267 | H | 14.103617 | 7.492764 | 36.860726 |
| H | 40.787738 | 5.746847 | 21.364101 | H | 13.169172 | 7.505300 | 42.651423 |
| H | 41.273254 | 2.247643 | 22.863581 | H | 25.462141 | 7.874854 | 42.720454 |
| H | 53.551989 | 3.698260 | 28.380741 | H | 24.310465 | 6.061938 | 41.587200 |
| H | 55.987670 | 3.325668 | 28.455557 | H | 13.612657 | 3.636577 | 39.860755 |
| H | 57.384070 | 3.866306 | 26.497837 | H | 28.216697 | 2.008692 | 39.513177 |
| H | 52.703453 | 5.454609 | 24.016838 | H | 18.537279 | 6.767242 | 45.804229 |
| H | 54.081216 | 5.976740 | 22.117071 | H | 19.580619 | 7.427872 | 32.728688 |
| H | 50.777334 | 2.334081 | 22.588860 | H | 17.702707 | 6.589646 | 34.044028 |
| H | 50.920764 | 1.795168 | 20.189752 | H | 14.336793 | 4.515175 | 44.860472 |
| H | 49.720416 | 3.170987 | 18.535916 | H | 12.425896 | 3.908791 | 46.208619 |
| H | 47.863901 | 6.134892 | 22.823855 | H | 12.826932 | 3.472824 | 32.680995 |



|   |           |          |           |   |           |          |           |
|---|-----------|----------|-----------|---|-----------|----------|-----------|
| H | 14.166070 | 7.134696 | 33.332637 | H | 49.784762 | 2.032522 | 35.573989 |
| H | 23.965200 | 5.091873 | 37.068454 | H | 48.469609 | 3.346803 | 33.997281 |
| H | 24.824411 | 1.812551 | 38.920762 | H | 46.408760 | 6.066264 | 38.403483 |
| H | 36.079108 | 3.517404 | 43.115415 | H | 45.097545 | 7.333863 | 36.806245 |
| H | 38.397850 | 2.687047 | 43.526468 | H | 44.087793 | 7.325903 | 42.286705 |
| H | 40.122701 | 2.931103 | 41.803621 | H | 45.084499 | 3.174223 | 39.940056 |
| H | 36.105162 | 4.906558 | 38.456578 | H | 49.595498 | 7.156092 | 45.774554 |
| H | 37.824263 | 5.107896 | 36.743235 | H | 50.669987 | 7.731505 | 32.684416 |
| H | 31.996563 | 2.696200 | 38.518074 | H | 48.846592 | 6.779690 | 34.000231 |
| H | 31.895785 | 1.961836 | 36.125638 | H | 45.682392 | 4.435447 | 44.848010 |
| H | 31.654397 | 3.604206 | 34.340636 | H | 43.834146 | 3.649765 | 46.195527 |
| H | 31.490760 | 7.505077 | 38.355817 | H | 44.264395 | 3.231483 | 32.666414 |
| H | 31.121536 | 9.137658 | 36.539153 | H | 45.212837 | 6.957070 | 33.281466 |
| H | 27.971311 | 7.929562 | 42.816933 | H | 54.726588 | 5.972575 | 36.665863 |
| H | 41.690171 | 7.684006 | 41.916647 | H | 9.463387  | 8.127081 | 58.062891 |
| H | 40.374121 | 6.059996 | 40.666789 | H | 7.916952  | 6.786724 | 56.693525 |
| H | 29.376782 | 3.808657 | 40.747702 | H | 10.728205 | 2.325409 | 54.106721 |
| H | 43.721546 | 1.570173 | 38.744950 | H | 7.191724  | 3.170711 | 53.803441 |
| H | 33.468301 | 8.784102 | 45.665307 | H | 19.533167 | 2.933042 | 59.265431 |
| H | 35.804536 | 7.236495 | 32.648072 | H | 21.931879 | 2.388170 | 59.271734 |
| H | 33.808443 | 6.908543 | 34.011528 | H | 23.384562 | 3.173117 | 57.472776 |
| H | 30.537522 | 5.077012 | 44.716970 | H | 18.840510 | 5.405475 | 55.143713 |
| H | 29.007029 | 3.703103 | 46.035339 | H | 20.301123 | 6.126899 | 53.359773 |
| H | 28.357284 | 4.845867 | 32.838100 | H | 16.904503 | 2.481506 | 53.493713 |
| H | 30.964118 | 8.436359 | 33.167746 | H | 16.937138 | 2.009271 | 51.083265 |
| H | 40.000961 | 5.031554 | 36.274095 | H | 15.723997 | 3.436829 | 49.527779 |
| H | 40.204290 | 1.774214 | 38.294245 | H | 14.004389 | 6.348451 | 53.959528 |
| H | 52.223254 | 3.700825 | 43.944821 | H | 12.798631 | 7.736406 | 52.378284 |
| H | 54.659053 | 3.326100 | 44.019118 | H | 11.840315 | 7.509332 | 58.212507 |
| H | 56.055350 | 3.866218 | 42.061077 | H | 24.894599 | 7.981786 | 58.100432 |
| H | 51.375026 | 5.454186 | 39.578959 | H | 23.419955 | 6.542454 | 56.801314 |
| H | 52.752312 | 5.975849 | 37.680109 | H | 12.285157 | 3.636351 | 55.427731 |
| H | 49.687660 | 2.511833 | 37.983184 | H | 26.470316 | 2.313096 | 53.982256 |

|   |           |          |           |   |           |          |           |
|---|-----------|----------|-----------|---|-----------|----------|-----------|
| H | 17.168272 | 6.739750 | 61.410763 | H | 50.894910 | 3.700260 | 59.506365 |
| H | 18.395550 | 7.383039 | 48.179043 | H | 53.331583 | 3.325667 | 59.581355 |
| H | 16.457966 | 6.732738 | 49.512230 | H | 54.727850 | 3.865772 | 57.623149 |
| H | 13.130146 | 4.375178 | 60.400585 | H | 50.047656 | 5.459292 | 55.145088 |
| H | 11.277957 | 3.574249 | 61.719288 | H | 51.424886 | 5.977024 | 53.243008 |
| H | 11.428219 | 3.818089 | 48.263196 | H | 48.420912 | 2.756581 | 53.490137 |
| H | 12.818151 | 7.343202 | 48.853898 | H | 48.513498 | 2.284436 | 51.081685 |
| H | 22.413837 | 6.286441 | 52.500382 | H | 47.155808 | 3.565310 | 49.518140 |
| H | 22.943912 | 2.660514 | 53.829720 | H | 45.130150 | 6.297301 | 53.934969 |
| H | 35.108793 | 3.113718 | 59.331062 | H | 43.783008 | 7.540045 | 52.344924 |
| H | 37.490291 | 2.503409 | 59.366450 | H | 42.918208 | 7.351888 | 58.288753 |
| H | 38.960859 | 3.152616 | 57.530073 | H | 43.579440 | 3.528085 | 55.363949 |
| H | 34.491456 | 5.457735 | 55.126372 | H | 48.405507 | 6.744903 | 61.407849 |
| H | 35.970167 | 6.041997 | 53.303596 | H | 49.391567 | 7.759244 | 48.148741 |
| H | 32.746110 | 2.732233 | 53.476170 | H | 47.533110 | 6.912869 | 49.484554 |
| H | 33.007720 | 2.387898 | 51.057080 | H | 44.381244 | 4.364549 | 60.399383 |
| H | 31.817910 | 3.804369 | 49.467570 | H | 42.519286 | 3.571724 | 61.717700 |
| H | 29.538991 | 6.349796 | 53.872972 | H | 42.827685 | 3.496648 | 48.243704 |
| H | 28.326923 | 7.698463 | 52.254920 | H | 43.836747 | 7.124644 | 48.823663 |
| H | 27.304708 | 7.522628 | 58.211737 | H | 53.398784 | 5.971494 | 52.227924 |
| H | 40.514046 | 7.822937 | 58.169903 | H | 17.068217 | 7.158091 | 63.835995 |
| H | 39.045217 | 6.421052 | 56.831034 | H | 15.148116 | 6.357243 | 65.155558 |
| H | 27.971066 | 3.709289 | 55.278258 | H | 10.263079 | 3.421937 | 63.797036 |
| H | 42.076273 | 2.156505 | 54.042280 | H | 32.687728 | 7.158939 | 63.834930 |
| H | 32.786132 | 6.743319 | 61.409029 | H | 30.767907 | 6.357413 | 65.154640 |
| H | 33.307805 | 9.108019 | 48.147756 | H | 25.881464 | 3.424920 | 63.795559 |
| H | 31.874742 | 7.661545 | 49.505603 | H | 48.307483 | 7.159191 | 63.833745 |
| H | 28.750249 | 4.373400 | 60.400225 | H | 46.387708 | 6.357409 | 65.153469 |
| H | 26.897922 | 3.574187 | 61.718490 | H | 41.500989 | 3.425592 | 63.794352 |
| H | 28.172421 | 3.254041 | 48.043832 | H | 54.922555 | 4.682833 | 55.325794 |
| H | 28.572442 | 7.407657 | 48.722924 | H | 56.250099 | 4.683168 | 39.763715 |
| H | 38.084611 | 6.086848 | 52.432575 | H | 57.578898 | 4.683439 | 24.200629 |
| H | 38.561066 | 2.570087 | 53.821063 | H | 32.654297 | 5.043409 | 18.026509 |

|   |           |           |           |             |           |          |           |
|---|-----------|-----------|-----------|-------------|-----------|----------|-----------|
| H | 17.034831 | 5.043615  | 18.026680 | H           | 40.270886 | 6.090198 | 43.992394 |
| H | 10.176551 | 4.915316  | 24.089663 | H           | 38.992725 | 4.980974 | 45.848182 |
| H | 8.848005  | 4.915598  | 39.653323 | H           | 36.492047 | 5.150674 | 45.867197 |
| H | 7.520594  | 4.915631  | 55.216384 | H           | 35.295597 | 6.357993 | 44.099507 |
| H | 12.998948 | 5.199014  | 65.269016 | H           | 37.085463 | 8.148999 | 41.382075 |
| H | 28.618753 | 5.199038  | 65.268137 | H           | 33.961202 | 5.941906 | 40.056400 |
| H | 44.238607 | 5.198880  | 65.267019 |             |           |          |           |
| H | 48.273994 | 5.043176  | 18.026054 |             |           |          |           |
| C | 35.119988 | 8.201373  | 42.128675 | (S,S)-1-TS3 |           |          |           |
| C | 34.627035 | 8.747348  | 40.754098 | C           | 12.487000 | 7.261000 | 26.395000 |
| C | 35.368574 | 10.047229 | 40.373512 | C           | 11.616000 | 6.503000 | 25.622000 |
| C | 35.261342 | 11.112646 | 41.470719 | C           | 12.086000 | 5.395000 | 24.927000 |
| C | 35.751413 | 10.569302 | 42.820815 | C           | 13.428000 | 5.043000 | 25.007000 |
| C | 34.990419 | 9.295101  | 43.207720 | C           | 13.027000 | 3.179000 | 23.539000 |
| O | 33.268413 | 9.016597  | 40.824209 | C           | 11.685000 | 3.529000 | 23.460000 |
| C | 37.098617 | 6.971102  | 43.035132 | C           | 11.215000 | 4.638000 | 24.154000 |
| C | 38.508224 | 6.869764  | 43.038206 | O           | 10.782000 | 2.793000 | 22.654000 |
| C | 39.178123 | 6.155851  | 44.028999 | Cu          | 18.543745 | 6.084628 | 26.025203 |
| C | 38.467110 | 5.532492  | 45.062825 | Cu          | 17.955154 | 3.694834 | 26.529620 |
| C | 37.071589 | 5.633353  | 45.072734 | C           | 22.226423 | 3.962421 | 26.387934 |
| C | 36.386586 | 6.334711  | 44.077501 | C           | 22.759067 | 3.167184 | 27.419209 |
| N | 36.463038 | 7.652068  | 42.009161 | C           | 24.114818 | 2.865077 | 27.460077 |
| H | 34.939955 | 10.413693 | 39.424289 | C           | 24.963950 | 3.344431 | 26.468350 |
| H | 34.853932 | 7.981567  | 39.984913 | C           | 24.471319 | 4.116310 | 25.399536 |
| H | 34.448206 | 7.364783  | 42.385427 | C           | 23.083082 | 4.414799 | 25.343066 |
| H | 34.202174 | 11.411137 | 41.563981 | C           | 22.584778 | 5.122671 | 24.228122 |
| H | 35.832681 | 12.014826 | 41.182737 | C           | 23.446196 | 5.563145 | 23.228238 |
| H | 36.836340 | 10.349277 | 42.763264 | C           | 24.813124 | 5.310017 | 23.303514 |
| H | 35.630568 | 11.333178 | 43.610627 | C           | 25.337343 | 4.576323 | 24.376333 |
| H | 33.918153 | 9.520631  | 43.326046 | O           | 25.660918 | 5.752711 | 22.294037 |
| H | 35.356986 | 8.902070  | 44.172295 | O           | 20.436502 | 5.523343 | 26.199554 |
| H | 36.433833 | 9.815546  | 40.168258 | O           | 19.921840 | 3.373913 | 26.649572 |
| H | 39.073020 | 7.369521  | 42.244032 | C           | 20.775898 | 4.306267 | 26.421165 |
|   |           |           |           | C           | 18.226927 | 4.022014 | 22.293999 |

|   |           |          |           |    |           |          |           |
|---|-----------|----------|-----------|----|-----------|----------|-----------|
| C | 18.992915 | 2.941012 | 21.873981 | O  | 17.902604 | 4.247107 | 28.434779 |
| C | 19.081890 | 2.638017 | 20.519979 | C  | 18.100407 | 5.459457 | 28.806085 |
| C | 18.404876 | 3.417023 | 19.587993 | Cu | 34.196480 | 6.078976 | 26.036156 |
| C | 17.639888 | 4.497024 | 20.008011 | Cu | 33.622835 | 3.692529 | 26.568353 |
| C | 17.550913 | 4.800019 | 21.362013 | C  | 37.879145 | 3.921306 | 26.343956 |
| C | 16.783924 | 5.881020 | 21.784030 | C  | 38.410104 | 3.189947 | 27.422751 |
| C | 16.107910 | 6.659026 | 20.850045 | C  | 39.754285 | 2.842498 | 27.457563 |
| C | 16.197885 | 6.355031 | 19.497042 | C  | 40.593076 | 3.211965 | 26.412618 |
| C | 16.963875 | 5.274030 | 19.076025 | C  | 40.101349 | 3.921958 | 25.300831 |
| O | 15.523872 | 7.185037 | 18.539057 | C  | 38.723582 | 4.266205 | 25.252073 |
| O | 18.565471 | 5.530824 | 24.116544 | C  | 38.222545 | 4.913178 | 24.103276 |
| O | 18.026509 | 3.388288 | 24.574537 | C  | 39.073491 | 5.241540 | 23.051978 |
| C | 18.266838 | 4.337436 | 23.747107 | C  | 40.433955 | 4.948756 | 23.118172 |
| C | 14.301000 | 5.801000 | 25.782000 | C  | 40.960825 | 4.283707 | 24.234091 |
| C | 13.829000 | 6.909000 | 26.476000 | O  | 41.273324 | 5.292967 | 22.064416 |
| C | 28.026948 | 7.145762 | 26.533147 | O  | 36.099288 | 5.500449 | 26.125423 |
| C | 27.180609 | 6.295099 | 25.830245 | O  | 35.582304 | 3.364663 | 26.636466 |
| C | 27.679885 | 5.166472 | 25.149126 | C  | 36.435603 | 4.285819 | 26.373665 |
| C | 29.074044 | 4.893815 | 25.199790 | C  | 33.846854 | 4.021972 | 22.293718 |
| C | 13.900000 | 3.935000 | 24.313000 | C  | 34.612831 | 2.940969 | 21.873683 |
| C | 28.724496 | 2.985350 | 23.738363 | C  | 34.701781 | 2.637978 | 20.519678 |
| C | 27.360070 | 3.218514 | 23.711011 | C  | 34.024753 | 3.416989 | 19.587708 |
| C | 26.812214 | 4.312639 | 24.417658 | C  | 33.259776 | 4.496991 | 20.007741 |
| O | 26.583595 | 2.322781 | 22.978987 | C  | 33.170826 | 4.799983 | 21.361747 |
| O | 16.596689 | 6.401801 | 25.859048 | C  | 32.403848 | 5.880986 | 21.783781 |
| O | 16.057099 | 4.260822 | 26.320553 | C  | 31.727821 | 6.658997 | 20.849810 |
| C | 15.736473 | 5.459892 | 25.988374 | C  | 31.817771 | 6.355005 | 19.496805 |
| C | 17.921302 | 5.795579 | 30.246473 | C  | 32.583748 | 5.274002 | 19.075771 |
| C | 18.913201 | 6.557058 | 30.891507 | O  | 31.143743 | 7.185016 | 18.538835 |
| C | 16.779324 | 5.369772 | 30.982870 | O  | 34.146693 | 5.534177 | 24.124971 |
| C | 15.704860 | 4.696775 | 30.363093 | O  | 33.647075 | 3.386634 | 24.594708 |
| C | 14.605134 | 4.284601 | 31.109846 | C  | 33.871502 | 4.335427 | 23.757424 |
| O | 18.430608 | 6.394897 | 27.990603 | C  | 29.927424 | 5.740576 | 25.962458 |

|    |           |          |           |   |           |          |           |
|----|-----------|----------|-----------|---|-----------|----------|-----------|
| C  | 29.387397 | 6.873722 | 26.597258 | O | 56.643771 | 5.617805 | 21.841785 |
| C  | 43.530883 | 6.874652 | 26.489569 | O | 51.637566 | 5.839302 | 26.123955 |
| C  | 42.726876 | 6.018173 | 25.748400 | O | 51.334307 | 3.663575 | 26.640401 |
| C  | 43.269488 | 4.904908 | 25.073591 | C | 52.092902 | 4.668399 | 26.382631 |
| C  | 44.667060 | 4.658940 | 25.163916 | C | 49.466779 | 4.021876 | 22.293156 |
| C  | 29.581495 | 3.805382 | 24.461356 | C | 50.232745 | 2.940872 | 21.873104 |
| C  | 44.396782 | 2.750174 | 23.688063 | C | 50.321669 | 2.637885 | 20.519096 |
| C  | 43.029819 | 2.963981 | 23.611864 | C | 49.644627 | 3.416901 | 19.587140 |
| C  | 42.440245 | 4.044153 | 24.306486 | C | 48.879661 | 4.496905 | 20.007192 |
| O  | 42.292515 | 2.057328 | 22.853725 | C | 48.790737 | 4.799893 | 21.361200 |
| O  | 32.226982 | 6.400781 | 25.972316 | C | 48.023772 | 5.880897 | 21.783251 |
| O  | 31.725216 | 4.251074 | 26.432050 | C | 47.347731 | 6.658913 | 20.849295 |
| C  | 31.378888 | 5.449226 | 26.132342 | C | 47.437655 | 6.354926 | 19.496287 |
| C  | 33.879229 | 5.799555 | 30.286144 | C | 48.203620 | 5.273922 | 19.075235 |
| C  | 35.033473 | 6.358673 | 30.864230 | O | 46.763613 | 7.184943 | 18.538331 |
| C  | 32.722801 | 5.601601 | 31.088846 | O | 49.731827 | 5.592331 | 24.089762 |
| C  | 31.520722 | 5.110801 | 30.541178 | O | 49.388174 | 3.426874 | 24.609531 |
| C  | 30.394669 | 4.955576 | 31.345963 | C | 49.526603 | 4.369432 | 23.750063 |
| O  | 34.191609 | 6.388090 | 28.001376 | C | 45.480562 | 5.528008 | 25.942645 |
| O  | 33.635586 | 4.254218 | 28.481732 | C | 44.894251 | 6.635973 | 26.581984 |
| C  | 33.904798 | 5.458705 | 28.837724 | C | 45.216554 | 3.579624 | 24.444325 |
| Cu | 49.694961 | 6.208051 | 25.983486 | O | 47.715241 | 6.340048 | 25.881976 |
| Cu | 49.343813 | 3.790887 | 26.565516 | O | 47.394062 | 4.171938 | 26.414236 |
| C  | 53.571003 | 4.464792 | 26.367939 | C | 46.949235 | 5.331476 | 26.085776 |
| C  | 54.157058 | 3.947774 | 27.515902 | C | 49.186785 | 5.999087 | 30.218599 |
| C  | 55.530059 | 3.732759 | 27.559826 | C | 50.123912 | 6.849756 | 30.833115 |
| C  | 56.316002 | 4.036762 | 26.454787 | C | 48.075512 | 5.524605 | 30.971057 |
| C  | 55.729946 | 4.554780 | 25.305823 | C | 47.052779 | 4.754305 | 30.377764 |
| C  | 54.356947 | 4.768795 | 25.262899 | C | 45.981030 | 4.298224 | 31.139076 |
| C  | 53.770890 | 5.287813 | 24.113936 | O | 49.603283 | 6.569851 | 27.939115 |
| C  | 54.557834 | 5.591815 | 23.007897 | O | 49.291502 | 4.396169 | 28.457135 |
| C  | 55.929834 | 5.377800 | 23.052821 | C | 49.379621 | 5.633393 | 28.788025 |
| C  | 56.515889 | 4.858782 | 24.200784 | C | 11.158286 | 7.260970 | 41.959133 |

|    |           |          |           |    |           |          |           |
|----|-----------|----------|-----------|----|-----------|----------|-----------|
| C  | 10.287269 | 6.502976 | 41.186145 | O  | 14.103159 | 7.457929 | 34.311095 |
| C  | 10.757253 | 5.394976 | 40.491133 | O  | 17.240389 | 5.397025 | 39.627972 |
| C  | 12.099253 | 5.042971 | 40.571108 | O  | 16.624286 | 3.271952 | 40.065856 |
| C  | 11.698221 | 3.178978 | 39.103109 | C  | 16.901252 | 4.220004 | 39.245484 |
| C  | 10.356221 | 3.528983 | 39.024134 | C  | 12.972270 | 5.800966 | 41.346096 |
| C  | 9.886237  | 4.637982 | 39.718146 | C  | 12.500286 | 6.908965 | 42.040108 |
| O  | 9.453204  | 2.792989 | 38.218147 | C  | 26.256355 | 6.494513 | 43.000095 |
| Cu | 17.253807 | 5.931767 | 41.539125 | C  | 25.579180 | 5.690791 | 42.106818 |
| Cu | 16.566515 | 3.568420 | 42.036519 | C  | 26.243431 | 4.726694 | 41.280744 |
| C  | 20.841009 | 3.625980 | 41.973308 | C  | 27.678271 | 4.614970 | 41.412665 |
| C  | 21.286309 | 2.831790 | 43.046733 | C  | 12.571237 | 3.934972 | 39.877096 |
| C  | 22.621315 | 2.463021 | 43.158656 | C  | 27.666520 | 2.901525 | 39.685516 |
| C  | 23.539640 | 2.881590 | 42.202355 | C  | 26.255720 | 2.995921 | 39.554773 |
| C  | 23.137291 | 3.655614 | 41.099122 | C  | 25.537152 | 3.901355 | 40.330862 |
| C  | 21.766442 | 4.006332 | 40.960960 | O  | 25.742741 | 2.136488 | 38.629731 |
| C  | 21.354373 | 4.699818 | 39.804779 | O  | 15.305397 | 6.339832 | 41.402521 |
| C  | 22.284615 | 5.069726 | 38.837947 | O  | 14.695189 | 4.218409 | 41.858939 |
| C  | 23.637256 | 4.786072 | 39.004605 | C  | 14.409507 | 5.430632 | 41.544770 |
| C  | 24.077374 | 4.086148 | 40.134172 | C  | 16.663876 | 5.669070 | 45.759444 |
| O  | 24.554151 | 5.176370 | 38.037200 | C  | 17.697885 | 6.391747 | 46.383330 |
| O  | 19.128530 | 5.272502 | 41.695008 | C  | 18.819190 | 6.851028 | 32.245973 |
| O  | 18.509323 | 3.152874 | 42.154793 | C  | 17.730059 | 6.396273 | 32.981045 |
| C  | 19.408472 | 4.042571 | 41.939585 | C  | 16.697664 | 5.658269 | 32.371549 |
| C  | 16.819145 | 3.949858 | 37.784119 | C  | 15.503186 | 5.324490 | 46.508224 |
| C  | 17.460800 | 2.808271 | 37.271143 | C  | 14.395787 | 4.686590 | 45.910240 |
| C  | 17.471200 | 2.550404 | 35.906657 | C  | 13.278110 | 4.354281 | 46.669851 |
| C  | 16.837466 | 3.424317 | 35.030091 | C  | 14.543817 | 4.525849 | 32.480055 |
| C  | 16.151872 | 4.562823 | 35.500959 | C  | 15.578589 | 5.219543 | 33.121797 |
| C  | 16.125259 | 4.820221 | 36.898075 | O  | 13.438728 | 4.108101 | 33.213329 |
| C  | 15.381864 | 5.919033 | 37.374313 | O  | 17.176871 | 6.236566 | 43.502607 |
| C  | 14.721391 | 6.758624 | 36.486021 | O  | 16.550386 | 4.115798 | 43.948037 |
| C  | 14.770570 | 6.540348 | 35.119296 | C  | 16.809942 | 5.317367 | 44.319361 |
| C  | 15.494215 | 5.442783 | 34.601354 | Cu | 33.543014 | 6.427878 | 41.519696 |

|    |           |          |           |    |           |          |           |
|----|-----------|----------|-----------|----|-----------|----------|-----------|
| Cu | 32.492640 | 3.946990 | 42.099887 | C  | 41.996899 | 5.159893 | 40.457568 |
| C  | 36.673833 | 3.647046 | 41.587373 | C  | 43.398983 | 4.939200 | 40.530454 |
| C  | 37.172790 | 2.660473 | 42.415937 | C  | 28.359510 | 3.685290 | 40.572403 |
| C  | 38.534853 | 2.292767 | 42.326467 | C  | 43.185886 | 3.227801 | 38.821536 |
| C  | 39.369979 | 2.911511 | 41.420460 | C  | 41.815238 | 3.419382 | 38.757504 |
| C  | 38.888044 | 3.907193 | 40.508419 | C  | 41.201564 | 4.385134 | 39.578474 |
| C  | 37.493398 | 4.252413 | 40.578052 | O  | 41.101114 | 2.607988 | 37.880385 |
| C  | 36.967230 | 5.163695 | 39.617468 | O  | 30.301291 | 6.658154 | 42.900097 |
| C  | 37.781185 | 5.731648 | 38.667095 | O  | 30.553819 | 4.535914 | 42.216365 |
| C  | 39.176114 | 5.460123 | 38.641349 | C  | 29.829536 | 5.509369 | 42.467782 |
| C  | 39.733010 | 4.559659 | 39.547219 | C  | 32.616778 | 5.989047 | 45.745105 |
| O  | 39.970409 | 6.081272 | 37.725589 | C  | 33.485559 | 6.891484 | 46.331146 |
| O  | 35.155960 | 5.405242 | 41.895967 | C  | 35.072933 | 6.675458 | 32.216170 |
| O  | 34.347139 | 3.307847 | 41.916711 | C  | 33.954229 | 6.458247 | 33.012529 |
| C  | 35.285830 | 4.151485 | 41.812788 | C  | 32.765551 | 5.935643 | 32.469869 |
| C  | 32.461700 | 4.190176 | 37.950604 | C  | 31.498157 | 5.460931 | 46.473780 |
| C  | 32.621298 | 2.890582 | 37.499993 | C  | 30.523549 | 4.611422 | 45.876690 |
| C  | 32.515414 | 2.608991 | 36.122518 | C  | 29.435191 | 4.167934 | 46.588306 |
| C  | 32.223571 | 3.615818 | 35.225777 | C  | 30.438648 | 5.267107 | 32.703769 |
| C  | 31.996473 | 4.966877 | 35.645886 | C  | 31.618752 | 5.753904 | 33.275434 |
| C  | 32.121670 | 5.253055 | 37.052038 | O  | 29.306768 | 5.106810 | 33.492759 |
| C  | 31.859216 | 6.579112 | 37.509024 | O  | 33.089446 | 6.573919 | 43.508534 |
| C  | 31.503006 | 7.563211 | 36.622190 | O  | 32.733000 | 4.410376 | 43.982157 |
| C  | 31.402371 | 7.299673 | 35.228971 | C  | 32.844817 | 5.623460 | 44.316204 |
| C  | 31.650853 | 6.024034 | 34.731607 | Cu | 48.411324 | 6.335883 | 41.580153 |
| O  | 31.061114 | 8.399793 | 34.492502 | Cu | 48.006528 | 3.899828 | 42.041708 |
| O  | 33.403649 | 5.433743 | 39.730524 | C  | 52.242278 | 4.464620 | 41.931334 |
| O  | 32.153896 | 3.632742 | 40.219140 | C  | 52.828353 | 3.947597 | 43.079285 |
| C  | 32.688107 | 4.452442 | 39.402213 | C  | 54.201353 | 3.732577 | 43.123183 |
| C  | 28.357061 | 5.488072 | 42.335198 | C  | 54.987278 | 4.036581 | 42.018131 |
| C  | 27.653731 | 6.409059 | 43.105094 | C  | 54.401203 | 4.554604 | 40.869180 |
| C  | 42.198388 | 6.939114 | 42.113898 | C  | 53.028203 | 4.768624 | 40.826281 |
| C  | 41.419768 | 6.158786 | 41.267193 | C  | 52.442128 | 5.287648 | 39.677330 |

|   |           |          |           |    |           |          |           |
|---|-----------|----------|-----------|----|-----------|----------|-----------|
| C | 53.229054 | 5.591652 | 38.571278 | C  | 45.677560 | 4.778986 | 45.907932 |
| C | 54.601054 | 5.377632 | 38.616177 | C  | 44.582533 | 4.349038 | 46.651475 |
| C | 55.187129 | 4.858609 | 39.764128 | C  | 45.899920 | 4.586854 | 32.498977 |
| O | 55.314970 | 5.617639 | 37.405129 | C  | 46.883066 | 5.373840 | 33.114369 |
| O | 50.346982 | 5.902366 | 41.722175 | O  | 44.825683 | 4.120439 | 33.248260 |
| O | 49.985782 | 3.720651 | 42.173043 | O  | 48.308400 | 6.603180 | 43.545492 |
| C | 50.770712 | 4.711690 | 41.952046 | O  | 47.906688 | 4.422037 | 43.960161 |
| C | 48.259825 | 4.348090 | 37.799499 | C  | 48.037926 | 5.639670 | 44.347794 |
| C | 49.046013 | 3.292587 | 37.303019 | C  | 9.830848  | 7.260896 | 57.522290 |
| C | 49.100539 | 3.023490 | 35.942460 | C  | 8.959816  | 6.502907 | 56.749315 |
| C | 48.366571 | 3.798559 | 35.052251 | C  | 9.429783  | 5.394908 | 56.054291 |
| C | 47.544183 | 4.851247 | 35.504162 | C  | 10.771783 | 5.042898 | 56.134241 |
| C | 47.477160 | 5.121920 | 36.897824 | C  | 10.370718 | 3.178911 | 54.666243 |
| C | 46.606222 | 6.131638 | 37.354233 | C  | 9.028718  | 3.528920 | 54.587293 |
| C | 45.859482 | 6.876910 | 36.450150 | C  | 8.558750  | 4.637919 | 55.281317 |
| C | 45.939375 | 6.644259 | 35.087130 | O  | 8.125684  | 2.792932 | 53.781319 |
| C | 46.787688 | 5.629866 | 34.588606 | Cu | 15.897896 | 6.120821 | 57.131618 |
| O | 45.175571 | 7.467337 | 34.262587 | Cu | 15.336931 | 3.711069 | 57.558430 |
| O | 48.454566 | 5.827249 | 39.659799 | C  | 19.596053 | 4.011068 | 57.433823 |
| O | 48.119921 | 3.635220 | 40.071554 | C  | 20.148698 | 3.246022 | 58.477005 |
| C | 48.278921 | 4.619334 | 39.262908 | C  | 21.501318 | 2.928426 | 58.488988 |
| C | 44.184728 | 5.719036 | 41.423509 | C  | 22.325305 | 3.359982 | 57.455016 |
| C | 43.568289 | 6.726456 | 42.187384 | C  | 21.810422 | 4.103286 | 56.375947 |
| C | 43.980463 | 3.970296 | 39.689092 | C  | 20.425939 | 4.420789 | 56.352318 |
| O | 46.431333 | 6.514312 | 41.465222 | C  | 19.902729 | 5.105607 | 55.234947 |
| O | 46.070373 | 4.319934 | 41.844819 | C  | 20.737057 | 5.494726 | 54.191588 |
| C | 45.648421 | 5.504484 | 41.585168 | C  | 22.102032 | 5.221604 | 54.231619 |
| C | 47.851063 | 5.958187 | 45.789994 | C  | 22.650951 | 4.519579 | 55.313577 |
| C | 48.811542 | 6.763797 | 46.429715 | O  | 22.923607 | 5.618083 | 53.182259 |
| C | 50.006244 | 7.189639 | 32.175110 | O  | 17.799158 | 5.570627 | 57.294952 |
| C | 48.947331 | 6.692402 | 32.926982 | O  | 17.301333 | 3.402809 | 57.674399 |
| C | 47.970031 | 5.861390 | 32.347108 | C  | 18.146843 | 4.348981 | 57.480294 |
| C | 46.716720 | 5.508959 | 46.522477 | C  | 15.635734 | 4.186980 | 53.326604 |



|   |           |          |           |    |           |          |           |
|---|-----------|----------|-----------|----|-----------|----------|-----------|
| C | 16.331252 | 3.071318 | 52.825960 | C  | 13.166040 | 4.552842 | 61.469196 |
| C | 16.347120 | 2.792238 | 51.466684 | C  | 12.083075 | 4.099846 | 62.213249 |
| C | 15.663671 | 3.617424 | 50.581785 | C  | 13.231259 | 4.641660 | 48.031731 |
| C | 14.935356 | 4.735838 | 51.037450 | C  | 14.298994 | 5.305730 | 48.651155 |
| C | 14.907335 | 5.017497 | 52.430305 | O  | 12.108925 | 4.300121 | 48.778124 |
| C | 14.124641 | 6.094727 | 52.891743 | O  | 15.767132 | 6.369002 | 59.105877 |
| C | 13.428672 | 6.893125 | 51.992552 | O  | 15.278838 | 4.200034 | 59.482510 |
| C | 13.476222 | 6.651253 | 50.629567 | C  | 15.449810 | 5.404643 | 59.893142 |
| C | 14.233507 | 5.569125 | 50.126274 | Cu | 31.471283 | 6.151134 | 57.128789 |
| O | 12.776332 | 7.534106 | 49.810157 | Cu | 30.968047 | 3.726701 | 57.544005 |
| O | 15.943900 | 5.630140 | 55.204111 | C  | 35.213133 | 4.096769 | 57.450120 |
| O | 15.427075 | 3.468235 | 55.587291 | C  | 35.756124 | 3.370492 | 58.526006 |
| C | 15.671986 | 4.444651 | 54.791855 | C  | 37.101379 | 3.025898 | 58.548157 |
| C | 11.644816 | 5.800887 | 56.909216 | C  | 37.927736 | 3.389053 | 57.490981 |
| C | 11.172849 | 6.908886 | 57.603240 | C  | 37.424444 | 4.098089 | 56.383583 |
| C | 25.305808 | 7.080196 | 57.511011 | C  | 36.047474 | 4.448351 | 56.352825 |
| C | 24.473453 | 6.237417 | 56.784377 | C  | 35.535620 | 5.104967 | 55.214439 |
| C | 24.986657 | 5.121937 | 56.091473 | C  | 36.373794 | 5.429271 | 54.151794 |
| C | 26.382516 | 4.858330 | 56.148824 | C  | 37.732044 | 5.122147 | 54.195792 |
| C | 11.243751 | 3.934900 | 55.440217 | C  | 38.270581 | 4.450871 | 55.302691 |
| C | 26.057438 | 2.973778 | 54.651592 | O  | 38.557446 | 5.456828 | 53.128357 |
| C | 24.690876 | 3.196467 | 54.619054 | O  | 33.391231 | 5.633829 | 57.269226 |
| C | 24.129730 | 4.273186 | 55.341805 | O  | 32.932133 | 3.460186 | 57.664984 |
| O | 23.925683 | 2.304279 | 53.871185 | C  | 33.760390 | 4.419647 | 57.470142 |
| O | 13.942982 | 6.423541 | 56.972252 | C  | 31.317174 | 4.225324 | 53.308070 |
| O | 13.431126 | 4.265426 | 57.376645 | C  | 32.069849 | 3.132759 | 52.839124 |
| C | 13.091584 | 5.470735 | 57.087776 | C  | 32.176407 | 2.868610 | 51.480713 |
| C | 15.283046 | 5.695821 | 61.352095 | C  | 31.524855 | 3.683071 | 50.562683 |
| C | 16.314087 | 6.385804 | 61.978046 | C  | 30.734157 | 4.770723 | 50.983452 |
| C | 17.620819 | 6.733487 | 47.727042 | C  | 30.620455 | 5.043747 | 52.374332 |
| C | 16.506742 | 6.366970 | 48.472752 | C  | 29.789413 | 6.101882 | 52.792827 |
| C | 15.437433 | 5.663102 | 47.886671 | C  | 29.126617 | 6.886733 | 51.854582 |
| C | 14.198081 | 5.242825 | 62.095148 | C  | 29.251662 | 6.646306 | 50.496364 |

|   |           |          |           |    |           |          |           |
|---|-----------|----------|-----------|----|-----------|----------|-----------|
| C | 30.054526 | 5.582132 | 50.042344 | Cu | 47.046876 | 6.244771 | 57.146035 |
| O | 28.573770 | 7.504456 | 49.634878 | Cu | 46.685888 | 3.789404 | 57.533326 |
| O | 31.510837 | 5.678489 | 55.195010 | C  | 50.914829 | 4.464394 | 57.493750 |
| O | 31.070768 | 3.498349 | 55.567364 | C  | 51.500923 | 3.947364 | 58.641689 |
| C | 31.292033 | 4.484778 | 54.775933 | C  | 52.873923 | 3.732339 | 58.685563 |
| C | 27.222289 | 5.698734 | 56.933131 | C  | 53.659830 | 4.036343 | 57.580498 |
| C | 26.666341 | 6.815642 | 57.583803 | C  | 53.073736 | 4.554373 | 56.431559 |
| C | 40.906433 | 6.953486 | 57.579390 | C  | 51.700736 | 4.768398 | 56.388685 |
| C | 40.082855 | 6.128407 | 56.825685 | C  | 51.114643 | 5.287428 | 55.239746 |
| C | 40.601415 | 5.023249 | 56.119726 | C  | 51.901549 | 5.591433 | 54.133681 |
| C | 41.997267 | 4.756158 | 56.185628 | C  | 53.273549 | 5.377407 | 54.178555 |
| C | 26.903589 | 3.787248 | 55.395413 | C  | 53.859642 | 4.858378 | 55.326493 |
| C | 41.679479 | 2.888664 | 54.667172 | O  | 53.987445 | 5.617415 | 52.967495 |
| C | 40.314075 | 3.119407 | 54.619003 | O  | 48.988758 | 5.856156 | 57.297108 |
| C | 39.748653 | 4.190745 | 55.347030 | O  | 48.672692 | 3.652270 | 57.668144 |
| O | 39.553673 | 2.236007 | 53.856174 | C  | 49.437046 | 4.670276 | 57.496493 |
| O | 29.500645 | 6.410340 | 56.999849 | C  | 46.948042 | 4.351163 | 53.311961 |
| O | 29.054299 | 4.230742 | 57.366361 | C  | 47.754511 | 3.318855 | 52.798914 |
| C | 28.678025 | 5.430217 | 57.106834 | C  | 47.791581 | 3.052822 | 51.437660 |
| C | 30.903120 | 5.695641 | 61.351269 | C  | 47.020324 | 3.808276 | 50.562995 |
| C | 31.934175 | 6.385618 | 61.977205 | C  | 46.184083 | 4.843434 | 51.030717 |
| C | 33.317831 | 7.258489 | 47.683387 | C  | 46.134902 | 5.110430 | 52.425791 |
| C | 32.273567 | 6.745523 | 48.422030 | C  | 45.250489 | 6.099922 | 52.899251 |
| C | 31.316539 | 5.844507 | 47.850973 | C  | 44.473138 | 6.830818 | 52.009314 |
| C | 29.818167 | 5.242646 | 62.094340 | C  | 44.536298 | 6.604093 | 50.644245 |
| C | 28.786113 | 4.552669 | 61.468405 | C  | 45.397754 | 5.608818 | 50.128823 |
| C | 27.703159 | 4.099675 | 62.212476 | O  | 43.748424 | 7.419503 | 49.835034 |
| C | 29.268595 | 4.508530 | 47.957057 | O  | 47.117584 | 5.792499 | 55.209342 |
| C | 30.198314 | 5.330623 | 48.591538 | O  | 46.809183 | 3.585788 | 55.560877 |
| O | 28.200667 | 4.027260 | 48.650299 | C  | 46.958748 | 4.592479 | 54.780019 |
| O | 31.360699 | 6.384435 | 59.105364 | C  | 42.831914 | 5.591567 | 56.980083 |
| O | 30.900210 | 4.207725 | 59.472521 | C  | 42.265892 | 6.690511 | 57.654119 |
| C | 31.061877 | 5.412149 | 59.889410 | C  | 42.522028 | 3.691581 | 55.427095 |

|   |           |          |           |   |           |          |           |
|---|-----------|----------|-----------|---|-----------|----------|-----------|
| O | 45.071845 | 6.390901 | 57.016861 | C | 44.303437 | 5.025398 | 64.205349 |
| O | 44.739126 | 4.185892 | 57.350780 | O | 42.183431 | 3.908432 | 64.359519 |
| C | 44.300179 | 5.371003 | 57.117171 | H | 12.119148 | 8.126810 | 26.936120 |
| C | 46.523195 | 5.695406 | 61.350162 | H | 10.573014 | 6.786735 | 25.566630 |
| C | 47.554262 | 6.385378 | 61.976082 | H | 13.382386 | 2.322459 | 22.982829 |
| C | 48.688708 | 7.091127 | 47.773434 | H | 9.847434  | 3.169537 | 22.676425 |
| C | 47.601258 | 6.626197 | 48.503116 | H | 22.112669 | 2.794756 | 28.206186 |
| C | 46.604856 | 5.833881 | 47.901067 | H | 24.512619 | 2.260096 | 28.268547 |
| C | 45.438253 | 5.242413 | 62.093251 | H | 26.014507 | 3.094851 | 26.534698 |
| C | 44.406185 | 4.552442 | 61.467332 | H | 21.528494 | 5.332980 | 24.100960 |
| C | 43.323243 | 4.099449 | 62.211421 | H | 23.039831 | 6.107683 | 22.386783 |
| C | 44.494387 | 4.623994 | 48.014044 | H | 19.532688 | 2.330022 | 22.589848 |
| C | 45.494098 | 5.372795 | 48.650430 | H | 19.679862 | 1.794462 | 20.190459 |
| O | 43.396636 | 4.183833 | 48.744765 | H | 18.480883 | 3.171000 | 18.536739 |
| O | 46.917259 | 6.441458 | 59.120646 | H | 16.654327 | 6.146537 | 22.827181 |
| O | 46.573581 | 4.237225 | 59.462108 | H | 15.507586 | 7.501999 | 21.163878 |
| C | 46.674407 | 5.442568 | 59.890041 | H | 14.495376 | 7.507694 | 27.088221 |
| C | 16.262162 | 6.620790 | 63.347051 | H | 27.623029 | 8.018080 | 27.036642 |
| C | 15.179196 | 6.168795 | 64.090104 | H | 26.127484 | 6.537312 | 25.807224 |
| C | 14.147156 | 5.478812 | 63.465153 | H | 14.941235 | 3.633099 | 24.313726 |
| C | 12.031150 | 4.336833 | 63.582254 | H | 29.121591 | 2.148191 | 23.179833 |
| C | 13.063191 | 5.025817 | 64.207206 | H | 19.774588 | 6.909420 | 30.334938 |
| O | 10.943187 | 3.908837 | 64.361307 | H | 15.688550 | 4.492904 | 29.297734 |
| C | 31.882275 | 6.620600 | 63.346211 | H | 13.795482 | 3.768545 | 30.612046 |
| C | 30.799322 | 6.168606 | 64.089282 | H | 15.672671 | 6.862191 | 17.596195 |
| C | 29.767267 | 5.478629 | 63.464346 | H | 25.174866 | 6.290762 | 21.592224 |
| C | 27.651260 | 4.336658 | 63.581482 | H | 25.604408 | 2.552462 | 22.985858 |
| C | 28.683314 | 5.025635 | 64.206417 | H | 37.770052 | 2.897221 | 28.247785 |
| O | 26.563309 | 3.908663 | 64.360554 | H | 40.150357 | 2.285358 | 28.300562 |
| C | 47.502389 | 6.620356 | 63.345091 | H | 41.634369 | 2.925395 | 26.472890 |
| C | 46.419447 | 6.168363 | 64.088179 | H | 37.172333 | 5.163482 | 23.994539 |
| C | 45.387379 | 5.478391 | 63.463260 | H | 38.666053 | 5.738526 | 22.182129 |
| C | 43.271369 | 4.336426 | 63.580429 | H | 35.150024 | 2.329229 | 22.590660 |

|                                |                                |
|--------------------------------|--------------------------------|
| H 35.298906 1.793801 20.190345 | H 9.244397 6.786902 41.130389  |
| H 34.100153 3.170629 18.536537 | H 12.054461 2.325295 38.542955 |
| H 32.266462 6.144150 22.826192 | H 8.520484 3.174008 38.235158  |
| H 31.125227 7.500300 21.163927 | H 20.586915 2.511043 43.811131 |
| H 30.031340 7.539574 27.160797 | H 22.949460 1.857157 43.997401 |
| H 43.093417 7.731549 26.991680 | H 24.573217 2.582379 42.323570 |
| H 41.671742 6.244629 25.693948 | H 20.313603 4.949387 39.622706 |
| H 30.640272 3.577838 24.415624 | H 21.944030 5.596452 37.956464 |
| H 44.825122 1.919425 23.143311 | H 17.969364 2.123521 37.940457 |
| H 35.913928 6.535862 30.256458 | H 17.978216 1.670758 35.523557 |
| H 31.433810 4.851015 29.489928 | H 16.870109 3.191490 33.975123 |
| H 29.480851 4.582583 30.903252 | H 15.285783 6.139667 38.431386 |
| H 31.289170 6.859474 17.596510 | H 14.155709 7.601935 36.859275 |
| H 40.790283 5.802907 21.339817 | H 13.169196 7.504876 42.651706 |
| H 41.311314 2.276284 22.825106 | H 25.706982 7.214910 43.613331 |
| H 53.552185 3.700598 28.381532 | H 24.495015 5.820363 42.040430 |
| H 55.987764 3.326392 28.455845 | H 13.612388 3.636253 39.860700 |
| H 57.384054 3.866433 26.497976 | H 28.189878 2.194104 39.036935 |
| H 52.703572 5.453970 24.015745 | H 18.574995 6.683674 45.816416 |
| H 54.081390 5.976929 22.117007 | H 19.597845 7.430159 32.731888 |
| H 50.777472 2.335022 22.589426 | H 17.691827 6.639685 34.034354 |
| H 50.920784 1.795168 20.189799 | H 14.368535 4.447009 44.852694 |
| H 49.720299 3.170770 18.535993 | H 12.443505 3.862370 46.189099 |
| H 47.864487 6.135485 22.823793 | H 12.777716 3.592267 32.651764 |
| H 46.741365 7.497413 21.163709 | H 14.148626 7.226855 33.333251 |
| H 45.507942 7.318149 27.159853 | H 24.132107 5.725123 37.301756 |
| H 46.279163 3.364643 24.443962 | H 24.785676 2.238248 38.511163 |
| H 50.958929 7.239961 30.261924 | H 36.517035 2.198772 43.159196 |
| H 47.056327 4.504734 29.322111 | H 38.933300 1.523611 42.995672 |
| H 45.210319 3.708350 30.661812 | H 40.424337 2.618844 41.393514 |
| H 46.907005 6.857885 17.596269 | H 35.902588 5.403836 39.613636 |
| H 56.056812 5.973990 21.102092 | H 37.354543 6.417538 37.925235 |
| H 10.790573 8.126876 42.500115 | H 32.852312 2.099435 38.217737 |

|   |           |          |           |   |           |          |           |
|---|-----------|----------|-----------|---|-----------|----------|-----------|
| H | 32.669451 | 1.586808 | 35.762584 | H | 45.686905 | 4.540355 | 44.849829 |
| H | 32.154927 | 3.355111 | 34.164754 | H | 43.799161 | 3.789692 | 46.158278 |
| H | 31.931686 | 6.818024 | 38.572670 | H | 44.200952 | 3.541023 | 32.707483 |
| H | 31.292982 | 8.580347 | 36.963538 | H | 45.248414 | 7.225068 | 33.289290 |
| H | 28.194789 | 7.069056 | 43.785160 | H | 54.726624 | 5.966808 | 36.663025 |
| H | 41.734775 | 7.712703 | 42.717775 | H | 9.463430  | 8.127146 | 58.062832 |
| H | 40.356362 | 6.356361 | 41.238202 | H | 7.917028  | 6.786919 | 56.693476 |
| H | 29.443685 | 3.596821 | 40.616960 | H | 10.726918 | 2.324704 | 54.106920 |
| H | 43.638737 | 2.485022 | 38.177777 | H | 7.193561  | 3.175391 | 53.796565 |
| H | 34.301657 | 7.312311 | 45.738759 | H | 19.519776 | 2.905246 | 59.291912 |
| H | 35.975935 | 7.091801 | 32.651271 | H | 21.915643 | 2.345634 | 59.305282 |
| H | 34.021901 | 6.713766 | 34.062547 | H | 23.373357 | 3.095361 | 57.496749 |
| H | 30.639446 | 4.299316 | 44.840280 | H | 18.847362 | 5.339128 | 55.143088 |
| H | 28.690840 | 3.527912 | 46.099669 | H | 20.312178 | 6.019277 | 53.346564 |
| H | 28.532273 | 4.710177 | 32.981133 | H | 16.869715 | 2.417440 | 53.502930 |
| H | 30.948219 | 8.196461 | 33.550775 | H | 16.891664 | 1.930301 | 51.094878 |
| H | 39.440743 | 6.699713 | 37.196741 | H | 15.695838 | 3.362756 | 49.532116 |
| H | 40.113913 | 2.815201 | 37.862054 | H | 14.027098 | 6.331786 | 53.945021 |
| H | 52.223565 | 3.706557 | 43.946538 | H | 12.836224 | 7.722995 | 52.354142 |
| H | 54.659244 | 3.327408 | 44.019610 | H | 11.840698 | 7.508839 | 58.212464 |
| H | 56.055342 | 3.866410 | 42.061235 | H | 24.891129 | 7.940673 | 58.025977 |
| H | 51.374936 | 5.456069 | 39.580968 | H | 23.419896 | 6.476120 | 56.753681 |
| H | 52.752597 | 5.977092 | 37.680422 | H | 12.284878 | 3.635448 | 55.428946 |
| H | 49.630126 | 2.682863 | 37.983403 | H | 26.464785 | 2.149694 | 54.081142 |
| H | 49.717187 | 2.210332 | 35.573573 | H | 17.168871 | 6.738413 | 61.410907 |
| H | 48.433867 | 3.555859 | 34.001356 | H | 18.429783 | 7.285091 | 48.195205 |
| H | 46.476677 | 6.353947 | 38.407253 | H | 16.480301 | 6.650686 | 49.516152 |
| H | 45.196485 | 7.653286 | 36.808239 | H | 13.129502 | 4.375128 | 60.400691 |
| H | 44.160587 | 7.341512 | 42.855782 | H | 11.278001 | 3.573873 | 61.719528 |
| H | 45.048539 | 3.779335 | 39.680014 | H | 11.425342 | 3.794407 | 48.234630 |
| H | 49.665043 | 7.135792 | 45.873805 | H | 12.839278 | 7.298966 | 48.834481 |
| H | 50.741712 | 7.839740 | 32.637864 | H | 22.423952 | 6.142317 | 52.479444 |
| H | 48.887584 | 6.975437 | 33.969358 | H | 22.946687 | 2.534525 | 53.865697 |

|   |           |          |           |   |           |          |           |
|---|-----------|----------|-----------|---|-----------|----------|-----------|
| H | 35.122568 | 3.072275 | 59.353933 | H | 43.800769 | 7.593009 | 52.380214 |
| H | 37.506612 | 2.469657 | 59.387168 | H | 42.893347 | 7.347267 | 58.246495 |
| H | 38.968539 | 3.098472 | 57.537998 | H | 43.582318 | 3.469295 | 55.395381 |
| H | 34.487008 | 5.368622 | 55.124054 | H | 48.405526 | 6.744636 | 61.407777 |
| H | 35.958367 | 5.932646 | 53.289353 | H | 49.439708 | 7.710099 | 48.253534 |
| H | 32.590180 | 2.489813 | 53.540584 | H | 47.535761 | 6.903879 | 49.546396 |
| H | 32.769928 | 2.028127 | 51.135132 | H | 44.382319 | 4.362982 | 60.399598 |
| H | 31.633062 | 3.443195 | 49.513250 | H | 42.519568 | 3.570976 | 61.717959 |
| H | 29.629228 | 6.332517 | 53.840615 | H | 42.760416 | 3.631048 | 48.189458 |
| H | 28.495486 | 7.702184 | 52.183157 | H | 43.807092 | 7.180239 | 48.860236 |
| H | 27.299034 | 7.476246 | 58.166180 | H | 53.398691 | 5.964446 | 52.224631 |
| H | 40.487098 | 7.804222 | 58.106645 | H | 17.068467 | 7.157627 | 63.836112 |
| H | 39.031308 | 6.373372 | 56.786219 | H | 15.148261 | 6.357127 | 65.155563 |
| H | 27.964527 | 3.569263 | 55.353486 | H | 10.261794 | 3.422546 | 63.798060 |
| H | 42.089367 | 2.068501 | 54.092927 | H | 32.688187 | 7.158113 | 63.835107 |
| H | 32.787645 | 6.739954 | 61.409294 | H | 30.768112 | 6.357258 | 65.154654 |
| H | 34.016516 | 7.963509 | 48.143334 | H | 25.879138 | 3.427455 | 63.796198 |
| H | 32.167982 | 7.056639 | 49.465933 | H | 48.307476 | 7.159243 | 63.833715 |
| H | 28.750397 | 4.373292 | 60.400134 | H | 46.387827 | 6.357481 | 65.153435 |
| H | 26.898021 | 3.573739 | 61.718725 | H | 41.497996 | 3.429485 | 63.794642 |
| H | 27.668963 | 3.449399 | 48.079090 | H | 54.922501 | 4.682764 | 55.325505 |
| H | 28.698385 | 7.273425 | 48.660920 | H | 56.250043 | 4.683192 | 39.763403 |
| H | 38.068398 | 5.966847 | 52.407695 | H | 57.578861 | 4.683541 | 24.200338 |
| H | 38.578021 | 2.478136 | 53.831569 | H | 32.654191 | 5.043642 | 18.026515 |
| H | 50.894859 | 3.699634 | 59.506114 | H | 17.034722 | 5.043892 | 18.026656 |
| H | 53.331526 | 3.325361 | 59.581251 | H | 10.176539 | 4.915037 | 24.089471 |
| H | 54.727797 | 3.865607 | 57.623223 | H | 8.847951  | 4.915251 | 39.653274 |
| H | 50.047792 | 5.460857 | 55.146018 | H | 7.520537  | 4.915276 | 55.216414 |
| H | 51.425188 | 5.977967 | 53.243217 | H | 12.998675 | 5.198814 | 65.268994 |
| H | 48.361298 | 2.719102 | 53.468201 | H | 28.618505 | 5.198903 | 65.268105 |
| H | 48.419886 | 2.254363 | 51.056550 | H | 44.238351 | 5.198855 | 65.266963 |
| H | 47.070539 | 3.563759 | 49.511705 | H | 48.273823 | 5.043387 | 18.026057 |
| H | 45.135423 | 6.318110 | 53.954915 | C | 31.886569 | 8.858477 | 41.380104 |

|            |           |           |           |    |           |          |           |
|------------|-----------|-----------|-----------|----|-----------|----------|-----------|
| C          | 33.059683 | 9.517926  | 42.180381 | C  | 11.616000 | 6.503000 | 25.622000 |
| C          | 34.266924 | 9.812256  | 41.272571 | C  | 12.086000 | 5.395000 | 24.927000 |
| C          | 33.901929 | 10.613068 | 40.014822 | C  | 13.428000 | 5.043000 | 25.007000 |
| C          | 32.775104 | 9.920674  | 39.236218 | C  | 13.027000 | 3.179000 | 23.539000 |
| C          | 31.551051 | 9.699182  | 40.132034 | C  | 11.685000 | 3.529000 | 23.460000 |
| O          | 32.155237 | 7.548263  | 40.982897 | C  | 11.215000 | 4.638000 | 24.154000 |
| C          | 31.805657 | 10.661831 | 44.014857 | O  | 10.782000 | 2.793000 | 22.654000 |
| C          | 31.173366 | 11.840573 | 44.474566 | Cu | 18.544657 | 6.086847 | 26.011838 |
| C          | 30.384948 | 11.831032 | 45.625102 | Cu | 17.950219 | 3.699582 | 26.527281 |
| C          | 30.195417 | 10.651423 | 46.357851 | C  | 22.213101 | 3.946373 | 26.371435 |
| C          | 30.811954 | 9.479505  | 45.906767 | C  | 22.754432 | 3.183026 | 27.421450 |
| C          | 31.600828 | 9.474083  | 44.754241 | C  | 24.106613 | 2.865353 | 27.448754 |
| N          | 32.623980 | 10.707553 | 42.892537 | C  | 24.942321 | 3.299538 | 26.425153 |
| H          | 35.046498 | 10.324248 | 41.864554 | C  | 24.438481 | 4.040247 | 25.338854 |
| H          | 33.387424 | 8.796402  | 42.940795 | C  | 23.053088 | 4.350069 | 25.295549 |
| H          | 31.002439 | 8.877650  | 42.050086 | C  | 22.539841 | 5.020365 | 24.164413 |
| H          | 34.797693 | 10.738113 | 39.379195 | C  | 23.386322 | 5.414177 | 23.132859 |
| H          | 33.583587 | 11.638469 | 40.295080 | C  | 24.752966 | 5.155545 | 23.195958 |
| H          | 32.497801 | 10.513984 | 38.345153 | C  | 25.290459 | 4.459686 | 24.287199 |
| H          | 33.133205 | 8.941650  | 38.870671 | O  | 25.587320 | 5.555548 | 22.157981 |
| H          | 31.144117 | 10.676378 | 40.461097 | O  | 20.435583 | 5.519026 | 26.184977 |
| H          | 30.745899 | 9.184487  | 39.579092 | O  | 19.911961 | 3.373179 | 26.646393 |
| H          | 34.696118 | 8.842466  | 40.951858 | C  | 20.768189 | 4.300789 | 26.411849 |
| H          | 31.312466 | 12.774337 | 43.917031 | C  | 18.226927 | 4.022014 | 22.293999 |
| H          | 29.911547 | 12.762744 | 45.954201 | C  | 18.992915 | 2.941012 | 21.873981 |
| H          | 29.580329 | 10.647972 | 47.262872 | C  | 19.081890 | 2.638017 | 20.519979 |
| H          | 30.690170 | 8.540965  | 46.458790 | C  | 18.404876 | 3.417023 | 19.587993 |
| H          | 32.054821 | 8.537322  | 44.434014 | C  | 17.639888 | 4.497024 | 20.008011 |
| H          | 31.272204 | 6.747687  | 42.736572 | C  | 17.550913 | 4.800019 | 21.362013 |
| H          | 32.536076 | 11.549316 | 42.333664 | C  | 16.783924 | 5.881020 | 21.784030 |
|            |           |           |           | C  | 16.107910 | 6.659026 | 20.850045 |
| (S,S)-1-PC |           |           |           | C  | 16.197885 | 6.355031 | 19.497042 |
| C          | 12.487000 | 7.261000  | 26.395000 | C  | 16.963875 | 5.274030 | 19.076025 |

|    |           |          |           |   |           |          |           |
|----|-----------|----------|-----------|---|-----------|----------|-----------|
| O  | 15.523872 | 7.185037 | 18.539057 | C | 38.674796 | 4.256217 | 25.353390 |
| O  | 18.566353 | 5.529134 | 24.109703 | C | 38.186874 | 4.903655 | 24.199272 |
| O  | 18.019665 | 3.389221 | 24.573093 | C | 39.051314 | 5.240904 | 23.162144 |
| C  | 18.264298 | 4.336472 | 23.744519 | C | 40.411658 | 4.952511 | 23.246189 |
| C  | 14.301000 | 5.801000 | 25.782000 | C | 40.925744 | 4.286828 | 24.367537 |
| C  | 13.829000 | 6.909000 | 26.476000 | O | 41.263732 | 5.298871 | 22.203316 |
| C  | 27.948477 | 7.043110 | 26.461752 | O | 36.023353 | 5.460258 | 26.200392 |
| C  | 27.113367 | 6.192079 | 25.746505 | O | 35.519212 | 3.307500 | 26.650730 |
| C  | 27.624136 | 5.066713 | 25.067337 | C | 36.367357 | 4.244384 | 26.430372 |
| C  | 29.018834 | 4.801668 | 25.127821 | C | 33.846854 | 4.021972 | 22.293718 |
| C  | 13.900000 | 3.935000 | 24.313000 | C | 34.612831 | 2.940969 | 21.873683 |
| C  | 28.693827 | 2.903897 | 23.647434 | C | 34.701781 | 2.637978 | 20.519678 |
| C  | 27.327226 | 3.124608 | 23.615977 | C | 34.024753 | 3.416989 | 19.587708 |
| C  | 26.767237 | 4.209626 | 24.327221 | C | 33.259776 | 4.496991 | 20.007741 |
| O  | 26.561293 | 2.225234 | 22.877138 | C | 33.170826 | 4.799983 | 21.361747 |
| O  | 16.596783 | 6.403796 | 25.846423 | C | 32.403848 | 5.880986 | 21.783781 |
| O  | 16.055675 | 4.265545 | 26.320299 | C | 31.727821 | 6.658997 | 20.849810 |
| C  | 15.736287 | 5.462774 | 25.983508 | C | 31.817771 | 6.355005 | 19.496805 |
| C  | 17.914128 | 5.826234 | 30.224939 | C | 32.583748 | 5.274002 | 19.075771 |
| C  | 18.899791 | 6.600533 | 30.863600 | O | 31.143743 | 7.185016 | 18.538835 |
| C  | 16.768491 | 5.408757 | 30.958589 | O | 34.118269 | 5.507784 | 24.152021 |
| C  | 15.698490 | 4.725991 | 30.341237 | O | 33.621417 | 3.349625 | 24.575160 |
| C  | 14.599493 | 4.313681 | 31.088519 | C | 33.852430 | 4.314726 | 23.759724 |
| O  | 18.432698 | 6.406603 | 27.971453 | C | 29.858817 | 5.645596 | 25.906942 |
| O  | 17.901209 | 4.261797 | 28.428299 | C | 29.307972 | 6.773552 | 26.541203 |
| C  | 18.099155 | 5.476826 | 28.790849 | C | 43.544936 | 6.889820 | 26.556471 |
| Cu | 34.117229 | 6.018443 | 26.073685 | C | 42.721937 | 6.019457 | 25.852836 |
| Cu | 33.558217 | 3.616324 | 26.548595 | C | 43.248724 | 4.899277 | 25.176927 |
| C  | 37.814939 | 3.897963 | 26.428169 | C | 44.649094 | 4.657770 | 25.230971 |
| C  | 38.333690 | 3.168585 | 27.513757 | C | 29.539849 | 3.724863 | 24.382177 |
| C  | 39.680878 | 2.835973 | 27.572566 | C | 44.343092 | 2.728090 | 23.790308 |
| C  | 40.534321 | 3.216510 | 26.543009 | C | 42.974028 | 2.937305 | 23.749819 |
| C  | 40.054396 | 3.922633 | 25.423592 | C | 42.401691 | 4.028788 | 24.441171 |



|    |           |          |           |    |           |          |           |
|----|-----------|----------|-----------|----|-----------|----------|-----------|
| O  | 42.218084 | 2.019875 | 23.023204 | C  | 48.790737 | 4.799893 | 21.361200 |
| O  | 32.149680 | 6.320601 | 25.965074 | C  | 48.023772 | 5.880897 | 21.783251 |
| O  | 31.658216 | 4.159785 | 26.383766 | C  | 47.347731 | 6.658913 | 20.849295 |
| C  | 31.307752 | 5.359658 | 26.094971 | C  | 47.437655 | 6.354926 | 19.496287 |
| C  | 33.658391 | 5.655617 | 30.307586 | C  | 48.203620 | 5.273922 | 19.075235 |
| C  | 34.722508 | 6.348606 | 30.913348 | O  | 46.763613 | 7.184943 | 18.538331 |
| C  | 32.525544 | 5.296422 | 31.090187 | O  | 49.734421 | 5.592870 | 24.087003 |
| C  | 31.393200 | 4.683819 | 30.515168 | O  | 49.385505 | 3.428955 | 24.610047 |
| C  | 30.292652 | 4.359450 | 31.303890 | C  | 49.526582 | 4.370138 | 23.749425 |
| O  | 34.052561 | 6.290199 | 28.044388 | C  | 45.481739 | 5.538830 | 25.974493 |
| O  | 33.525649 | 4.137728 | 28.468786 | C  | 44.911096 | 6.655648 | 26.612325 |
| C  | 33.751965 | 5.341345 | 28.854574 | C  | 45.181533 | 3.571996 | 24.508544 |
| Cu | 49.698256 | 6.211339 | 25.978573 | O  | 47.718272 | 6.344711 | 25.879681 |
| Cu | 49.345783 | 3.795419 | 26.565743 | O  | 47.397080 | 4.178879 | 26.421239 |
| C  | 53.571003 | 4.464792 | 26.367939 | C  | 46.951935 | 5.338453 | 26.094163 |
| C  | 54.157058 | 3.947774 | 27.515902 | C  | 49.207051 | 6.011871 | 30.212739 |
| C  | 55.530059 | 3.732759 | 27.559826 | C  | 50.146400 | 6.867050 | 30.817072 |
| C  | 56.316002 | 4.036762 | 26.454787 | C  | 48.102856 | 5.537099 | 30.974181 |
| C  | 55.729946 | 4.554780 | 25.305823 | C  | 47.075993 | 4.765249 | 30.390016 |
| C  | 54.356947 | 4.768795 | 25.262899 | C  | 46.013858 | 4.304521 | 31.161665 |
| C  | 53.770890 | 5.287813 | 24.113936 | O  | 49.609673 | 6.577494 | 27.931690 |
| C  | 54.557834 | 5.591815 | 23.007897 | O  | 49.300532 | 4.404606 | 28.455659 |
| C  | 55.929834 | 5.377800 | 23.052821 | C  | 49.390605 | 5.642581 | 28.782990 |
| C  | 56.515889 | 4.858782 | 24.200784 | C  | 11.158286 | 7.260970 | 41.959133 |
| O  | 56.643771 | 5.617805 | 21.841785 | C  | 10.287269 | 6.502976 | 41.186145 |
| O  | 51.639683 | 5.840398 | 26.120564 | C  | 10.757253 | 5.394976 | 40.491133 |
| O  | 51.334761 | 3.664827 | 26.637093 | C  | 12.099253 | 5.042971 | 40.571108 |
| C  | 52.093707 | 4.669286 | 26.380635 | C  | 11.698221 | 3.178978 | 39.103109 |
| C  | 49.466779 | 4.021876 | 22.293156 | C  | 10.356221 | 3.528983 | 39.024134 |
| C  | 50.232745 | 2.940872 | 21.873104 | C  | 9.886237  | 4.637982 | 39.718146 |
| C  | 50.321669 | 2.637885 | 20.519096 | O  | 9.453204  | 2.792989 | 38.218147 |
| C  | 49.644627 | 3.416901 | 19.587140 | Cu | 17.233239 | 6.185329 | 41.491023 |
| C  | 48.879661 | 4.496905 | 20.007192 | Cu | 16.704833 | 3.783237 | 41.996855 |

|   |           |          |           |    |           |          |           |
|---|-----------|----------|-----------|----|-----------|----------|-----------|
| C | 20.971566 | 4.151137 | 41.947704 | C  | 27.939837 | 5.064404 | 40.842659 |
| C | 21.455626 | 3.375544 | 43.017671 | C  | 12.571237 | 3.934972 | 39.877096 |
| C | 22.807891 | 3.081963 | 43.135815 | C  | 27.509081 | 2.911225 | 39.797109 |
| C | 23.704803 | 3.544847 | 42.180101 | C  | 26.121451 | 3.205238 | 39.712483 |
| C | 23.265789 | 4.292460 | 41.072322 | C  | 25.626985 | 4.421635 | 40.175530 |
| C | 21.881329 | 4.595417 | 40.944692 | O  | 25.391741 | 2.195779 | 39.149365 |
| C | 21.442361 | 5.296163 | 39.802197 | O  | 15.266704 | 6.452168 | 41.352712 |
| C | 22.356031 | 5.715303 | 38.838808 | O  | 14.787738 | 4.296762 | 41.807406 |
| C | 23.714928 | 5.443034 | 38.976510 | C  | 14.427995 | 5.491306 | 41.501233 |
| C | 24.178915 | 4.723805 | 40.082051 | C  | 16.673562 | 5.896706 | 45.714752 |
| O | 24.611914 | 5.861842 | 38.002205 | C  | 17.671113 | 6.673943 | 46.331965 |
| O | 19.147302 | 5.668923 | 41.652850 | C  | 18.795520 | 6.917772 | 32.211435 |
| O | 18.676352 | 3.513700 | 42.121099 | C  | 17.702738 | 6.471112 | 32.945789 |
| C | 19.512484 | 4.463952 | 41.903406 | C  | 16.678596 | 5.715992 | 32.341950 |
| C | 16.938426 | 4.155210 | 37.751091 | C  | 15.543366 | 5.481831 | 46.473718 |
| C | 17.667403 | 3.065237 | 37.243622 | C  | 14.465770 | 4.789791 | 45.882089 |
| C | 17.685590 | 2.793474 | 35.882416 | C  | 13.376578 | 4.390886 | 46.651124 |
| C | 16.973542 | 3.603266 | 35.004435 | C  | 14.534255 | 4.565940 | 32.456257 |
| C | 16.204709 | 4.690049 | 35.471132 | C  | 15.560661 | 5.276345 | 33.093024 |
| C | 16.167988 | 4.956907 | 36.865398 | O  | 13.431292 | 4.146142 | 33.191446 |
| C | 15.338679 | 5.992984 | 37.340080 | O  | 17.132952 | 6.493214 | 43.453364 |
| C | 14.607158 | 6.770184 | 36.451382 | O  | 16.643675 | 4.337986 | 43.905708 |
| C | 14.667928 | 6.549489 | 35.085622 | C  | 16.828838 | 5.554219 | 44.273495 |
| C | 15.473022 | 5.508319 | 34.570387 | Cu | 33.082910 | 6.277405 | 41.485003 |
| O | 13.930524 | 7.410879 | 34.276021 | Cu | 32.407003 | 3.875876 | 42.196286 |
| O | 17.258986 | 5.640445 | 39.583251 | C  | 36.585070 | 3.868641 | 41.905810 |
| O | 16.789668 | 3.479741 | 40.032135 | C  | 37.123588 | 3.105352 | 42.922620 |
| C | 17.002383 | 4.440168 | 39.208168 | C  | 38.515688 | 2.872624 | 42.966985 |
| C | 12.972270 | 5.800966 | 41.346096 | C  | 39.341356 | 3.379290 | 41.987435 |
| C | 12.500286 | 6.908965 | 42.040108 | C  | 38.826231 | 4.135486 | 40.883951 |
| C | 27.017909 | 7.600305 | 41.690763 | C  | 37.407663 | 4.377845 | 40.847807 |
| C | 26.121792 | 6.675893 | 41.194398 | C  | 36.865504 | 5.077669 | 39.732383 |
| C | 26.538696 | 5.385137 | 40.734688 | C  | 37.679211 | 5.541589 | 38.725483 |

|   |           |          |           |    |           |          |           |
|---|-----------|----------|-----------|----|-----------|----------|-----------|
| C | 39.085255 | 5.342371 | 38.771405 | C  | 30.288011 | 5.728417 | 41.597176 |
| C | 39.660585 | 4.640155 | 39.828996 | C  | 32.435542 | 6.226112 | 45.706568 |
| O | 39.872075 | 5.829887 | 37.770317 | C  | 33.355196 | 7.074603 | 46.295279 |
| O | 34.857373 | 5.450782 | 41.833583 | C  | 34.704223 | 6.641649 | 32.270825 |
| O | 34.295780 | 3.305798 | 42.194460 | C  | 33.615924 | 6.261286 | 33.047852 |
| C | 35.136473 | 4.224691 | 41.977170 | C  | 32.512749 | 5.597534 | 32.479655 |
| C | 32.480700 | 3.940365 | 37.976569 | C  | 31.318086 | 5.720694 | 46.450066 |
| C | 32.946490 | 2.710973 | 37.544358 | C  | 30.293867 | 4.938944 | 45.842333 |
| C | 32.936373 | 2.404928 | 36.166672 | C  | 29.224567 | 4.486763 | 46.577052 |
| C | 32.444145 | 3.313255 | 35.251772 | C  | 30.289344 | 4.629331 | 32.670497 |
| C | 31.904913 | 4.578878 | 35.652286 | C  | 31.390943 | 5.250706 | 33.266650 |
| C | 31.922474 | 4.889232 | 37.058273 | O  | 29.178484 | 4.310951 | 33.440944 |
| C | 31.339641 | 6.115853 | 37.494090 | O  | 32.898828 | 6.728880 | 43.438304 |
| C | 30.792142 | 6.991648 | 36.592614 | O  | 32.570871 | 4.580208 | 44.028164 |
| C | 30.803387 | 6.713331 | 35.199448 | C  | 32.646431 | 5.817917 | 44.280987 |
| C | 31.352346 | 5.527320 | 34.720961 | Cu | 48.447525 | 6.405307 | 41.581496 |
| O | 30.244081 | 7.707823 | 34.446465 | Cu | 47.996185 | 3.981643 | 42.063505 |
| O | 33.122032 | 5.405129 | 39.701820 | C  | 52.242278 | 4.464620 | 41.931334 |
| O | 32.245587 | 3.413321 | 40.275583 | C  | 52.828353 | 3.947597 | 43.079285 |
| C | 32.618862 | 4.276193 | 39.425833 | C  | 54.201353 | 3.732577 | 43.123183 |
| C | 28.839101 | 6.036144 | 41.393441 | C  | 54.987278 | 4.036581 | 42.018131 |
| C | 28.390621 | 7.288297 | 41.778401 | C  | 54.401203 | 4.554604 | 40.869180 |
| C | 42.281066 | 7.244593 | 42.005461 | C  | 53.028203 | 4.768624 | 40.826281 |
| C | 41.451873 | 6.392618 | 41.285045 | C  | 52.442128 | 5.287648 | 39.677330 |
| C | 41.973060 | 5.283739 | 40.589957 | C  | 53.229054 | 5.591652 | 38.571278 |
| C | 43.371728 | 5.031132 | 40.642877 | C  | 54.601054 | 5.377632 | 38.616177 |
| C | 28.390598 | 3.805065 | 40.347784 | C  | 55.187129 | 4.858609 | 39.764128 |
| C | 43.053832 | 3.144479 | 39.149067 | O  | 55.314970 | 5.617639 | 37.405129 |
| C | 41.685129 | 3.353664 | 39.125978 | O  | 50.373272 | 5.935993 | 41.731917 |
| C | 41.125878 | 4.431087 | 39.841157 | O  | 49.972410 | 3.763135 | 42.191325 |
| O | 40.919462 | 2.449650 | 38.394451 | C  | 50.775179 | 4.737888 | 41.961794 |
| O | 31.128822 | 6.607959 | 41.249741 | C  | 48.282112 | 4.387251 | 37.822235 |
| O | 30.574947 | 4.611711 | 42.128315 | C  | 49.078278 | 3.334551 | 37.337279 |

|   |           |          |           |    |           |          |           |
|---|-----------|----------|-----------|----|-----------|----------|-----------|
| C | 49.149862 | 3.063856 | 35.977852 | C  | 8.959816  | 6.502907 | 56.749315 |
| C | 48.422259 | 3.835101 | 35.078426 | C  | 9.429783  | 5.394908 | 56.054291 |
| C | 47.588223 | 4.883285 | 35.520585 | C  | 10.771783 | 5.042898 | 56.134241 |
| C | 47.504790 | 5.154747 | 36.912578 | C  | 10.370718 | 3.178911 | 54.666243 |
| C | 46.622963 | 6.158501 | 37.360444 | C  | 9.028718  | 3.528920 | 54.587293 |
| C | 45.881796 | 6.899792 | 36.449060 | C  | 8.558750  | 4.637919 | 55.281317 |
| C | 45.978925 | 6.668827 | 35.086867 | O  | 8.125684  | 2.792932 | 53.781319 |
| C | 46.835483 | 5.656624 | 34.597793 | Cu | 15.889468 | 6.156466 | 57.135009 |
| O | 45.222242 | 7.490173 | 34.253715 | Cu | 15.348554 | 3.738428 | 57.542485 |
| O | 48.489257 | 5.878561 | 39.667227 | C  | 19.601151 | 4.076287 | 57.420329 |
| O | 48.104289 | 3.697680 | 40.096946 | C  | 20.158966 | 3.302875 | 58.454108 |
| C | 48.291776 | 4.670609 | 39.281412 | C  | 21.513159 | 2.993468 | 58.461908 |
| C | 44.207621 | 5.877739 | 41.423501 | C  | 22.333500 | 3.443345 | 57.432852 |
| C | 43.643789 | 6.990628 | 42.073997 | C  | 21.812930 | 4.196452 | 56.362837 |
| C | 43.898597 | 3.964710 | 39.888059 | C  | 20.426432 | 4.503599 | 56.342760 |
| O | 46.473154 | 6.621615 | 41.454227 | C  | 19.897062 | 5.194497 | 55.231833 |
| O | 46.067753 | 4.442134 | 41.867373 | C  | 20.728380 | 5.604314 | 54.194148 |
| C | 45.668886 | 5.630271 | 41.586444 | C  | 22.095654 | 5.343377 | 54.232338 |
| C | 47.857289 | 6.069620 | 45.792131 | C  | 22.649492 | 4.631560 | 55.305106 |
| C | 48.814973 | 6.878092 | 46.431947 | O  | 22.914650 | 5.759145 | 53.188521 |
| C | 50.038758 | 7.210980 | 32.158641 | O  | 17.793816 | 5.622542 | 57.296248 |
| C | 48.987683 | 6.711929 | 32.920317 | O  | 17.313928 | 3.447378 | 57.658071 |
| C | 48.008312 | 5.876181 | 32.350196 | C  | 18.150814 | 4.402284 | 57.471174 |
| C | 46.722677 | 5.619346 | 46.523562 | C  | 15.669246 | 4.252112 | 53.314298 |
| C | 45.680643 | 4.895155 | 45.906633 | C  | 16.392877 | 3.154626 | 52.814319 |
| C | 44.591660 | 4.453151 | 46.651793 | C  | 16.442065 | 2.893325 | 51.452276 |
| C | 45.944734 | 4.593553 | 32.522046 | C  | 15.761815 | 3.717591 | 50.563583 |
| C | 46.928984 | 5.387197 | 33.126655 | C  | 15.000859 | 4.814279 | 51.018685 |
| O | 44.880776 | 4.121555 | 33.282535 | C  | 14.942762 | 5.079714 | 52.414090 |
| O | 48.339733 | 6.692052 | 43.544872 | C  | 14.132469 | 6.136985 | 52.873337 |
| O | 47.908028 | 4.519927 | 43.976101 | C  | 13.437286 | 6.932174 | 51.970656 |
| C | 48.051766 | 5.738926 | 44.353770 | C  | 13.509281 | 6.703514 | 50.606290 |
| C | 9.830848  | 7.260896 | 57.522290 | C  | 14.294056 | 5.640453 | 50.104871 |

|    |           |          |           |    |           |          |           |
|----|-----------|----------|-----------|----|-----------|----------|-----------|
| O  | 12.799637 | 7.576104 | 49.783887 | Cu | 30.951733 | 3.770066 | 57.520498 |
| O  | 15.941978 | 5.684220 | 55.204024 | C  | 35.198708 | 4.119403 | 57.428663 |
| O  | 15.444155 | 3.514401 | 55.568263 | C  | 35.733794 | 3.374329 | 58.495377 |
| C  | 15.684598 | 4.499356 | 54.781577 | C  | 37.079874 | 3.033916 | 58.524553 |
| C  | 11.644816 | 5.800887 | 56.909216 | C  | 37.915469 | 3.421679 | 57.483295 |
| C  | 11.172849 | 6.908886 | 57.603240 | C  | 37.419437 | 4.147200 | 56.383130 |
| C  | 25.306115 | 7.136479 | 57.567251 | C  | 36.040894 | 4.490632 | 56.344328 |
| C  | 24.472739 | 6.314288 | 56.817957 | C  | 35.535417 | 5.158540 | 55.209703 |
| C  | 24.985250 | 5.218107 | 56.093588 | C  | 36.381712 | 5.503186 | 54.159988 |
| C  | 26.381005 | 4.955073 | 56.139564 | C  | 37.741460 | 5.204410 | 54.213240 |
| C  | 11.243751 | 3.934900 | 55.440217 | C  | 38.273416 | 4.520659 | 55.315540 |
| C  | 26.056771 | 3.114308 | 54.589503 | O  | 38.574961 | 5.556970 | 53.157882 |
| C  | 24.689252 | 3.332285 | 54.570133 | O  | 33.384925 | 5.666473 | 57.262577 |
| C  | 24.128163 | 4.387550 | 55.324269 | O  | 32.914494 | 3.490546 | 57.632056 |
| O  | 23.923183 | 2.456283 | 53.803893 | C  | 33.747529 | 4.448006 | 57.448418 |
| O  | 13.934516 | 6.440591 | 56.975741 | C  | 31.266566 | 4.330388 | 53.289469 |
| O  | 13.440007 | 4.275189 | 57.363794 | C  | 32.004865 | 3.241979 | 52.790462 |
| C  | 13.091854 | 5.479387 | 57.083308 | C  | 32.093663 | 3.004031 | 51.425779 |
| C  | 15.283046 | 5.695821 | 61.352095 | C  | 31.438873 | 3.842469 | 50.531322 |
| C  | 16.314087 | 6.385804 | 61.978046 | C  | 30.659729 | 4.925826 | 50.982675 |
| C  | 17.592339 | 6.999230 | 47.679738 | C  | 30.561611 | 5.169248 | 52.380695 |
| C  | 16.511749 | 6.560900 | 48.436407 | C  | 29.735121 | 6.217374 | 52.831342 |
| C  | 15.475997 | 5.804120 | 47.856195 | C  | 29.065446 | 7.024342 | 51.918000 |
| C  | 14.198081 | 5.242825 | 62.095148 | C  | 29.178994 | 6.816439 | 50.553129 |
| C  | 13.166040 | 4.552842 | 61.469196 | C  | 29.973967 | 5.760328 | 50.065869 |
| C  | 12.083075 | 4.099846 | 62.213249 | O  | 28.496374 | 7.698039 | 49.719382 |
| C  | 13.329595 | 4.664918 | 48.016037 | O  | 31.495894 | 5.750817 | 55.195890 |
| C  | 14.367062 | 5.380195 | 48.629550 | O  | 31.044081 | 3.568347 | 55.540171 |
| O  | 12.234592 | 4.260175 | 48.771430 | C  | 31.263525 | 4.565298 | 54.761435 |
| O  | 15.754795 | 6.387229 | 59.110229 | C  | 27.220213 | 5.771352 | 56.947630 |
| O  | 15.282947 | 4.211895 | 59.471414 | C  | 26.666340 | 6.868829 | 57.631182 |
| C  | 15.445946 | 5.414784 | 59.890665 | C  | 40.919424 | 6.977837 | 57.636570 |
| Cu | 31.468161 | 6.196866 | 57.135104 | C  | 40.090738 | 6.163774 | 56.875677 |

|    |           |          |           |   |           |          |           |
|----|-----------|----------|-----------|---|-----------|----------|-----------|
| C  | 40.606437 | 5.075235 | 56.141863 | C | 51.901549 | 5.591433 | 54.133681 |
| C  | 42.003841 | 4.813295 | 56.187751 | C | 53.273549 | 5.377407 | 54.178555 |
| C  | 26.902971 | 3.908898 | 55.352697 | C | 53.859642 | 4.858378 | 55.326493 |
| C  | 41.681045 | 2.978572 | 54.631937 | O | 53.987445 | 5.617415 | 52.967495 |
| C  | 40.313684 | 3.200920 | 54.605013 | O | 48.997262 | 5.867465 | 57.306580 |
| C  | 39.750354 | 4.255079 | 55.359607 | O | 48.669863 | 3.662465 | 57.661823 |
| O  | 39.549600 | 2.327124 | 53.834442 | C | 49.438919 | 4.677826 | 57.498207 |
| O  | 29.500170 | 6.470113 | 57.017037 | C | 46.967503 | 4.406111 | 53.308640 |
| O  | 29.041863 | 4.287985 | 57.355958 | C | 47.788866 | 3.390353 | 52.787595 |
| C  | 28.672975 | 5.493271 | 57.114138 | C | 47.836505 | 3.141953 | 51.423340 |
| C  | 30.903120 | 5.695641 | 61.351269 | C | 47.061013 | 3.899972 | 50.554036 |
| C  | 31.934175 | 6.385618 | 61.977205 | C | 46.209515 | 4.918918 | 51.030698 |
| C  | 33.239194 | 7.398844 | 47.665740 | C | 46.149703 | 5.166424 | 52.428741 |
| C  | 32.202712 | 6.892797 | 48.420946 | C | 45.249681 | 6.136877 | 52.911548 |
| C  | 31.196237 | 6.048142 | 47.848363 | C | 44.466647 | 6.869115 | 52.028335 |
| C  | 29.818167 | 5.242646 | 62.094340 | C | 44.539264 | 6.662379 | 50.660585 |
| C  | 28.786113 | 4.552669 | 61.468405 | C | 45.416414 | 5.685732 | 50.135611 |
| C  | 27.703159 | 4.099675 | 62.212476 | O | 43.743698 | 7.478125 | 49.858976 |
| C  | 29.121128 | 4.761158 | 47.967366 | O | 47.131693 | 5.830376 | 55.215865 |
| C  | 30.089188 | 5.534744 | 48.606389 | O | 46.813953 | 3.621848 | 55.549613 |
| O  | 28.066094 | 4.270566 | 48.675115 | C | 46.971160 | 4.634162 | 54.777625 |
| O  | 31.363954 | 6.404450 | 59.113765 | C | 42.842250 | 5.633998 | 56.991920 |
| O  | 30.891535 | 4.226324 | 59.455962 | C | 42.280391 | 6.717812 | 57.692394 |
| C  | 31.058939 | 5.425144 | 59.886494 | C | 42.526842 | 3.769813 | 55.399674 |
| Cu | 47.058278 | 6.267612 | 57.154248 | O | 45.084687 | 6.424156 | 57.024047 |
| Cu | 46.685394 | 3.810683 | 57.523270 | O | 44.742252 | 4.217590 | 57.340388 |
| C  | 50.914829 | 4.464394 | 57.493750 | C | 44.309074 | 5.406870 | 57.118925 |
| C  | 51.500923 | 3.947364 | 58.641689 | C | 46.523195 | 5.695406 | 61.350162 |
| C  | 52.873923 | 3.732339 | 58.685563 | C | 47.554262 | 6.385378 | 61.976082 |
| C  | 53.659830 | 4.036343 | 57.580498 | C | 48.691200 | 7.204820 | 47.775809 |
| C  | 53.073736 | 4.554373 | 56.431559 | C | 47.607315 | 6.732279 | 48.506431 |
| C  | 51.700736 | 4.768398 | 56.388685 | C | 46.613989 | 5.936078 | 47.904158 |
| C  | 51.114643 | 5.287428 | 55.239746 | C | 45.438253 | 5.242413 | 62.093251 |

|   |           |          |           |   |           |          |           |
|---|-----------|----------|-----------|---|-----------|----------|-----------|
| C | 44.406185 | 4.552442 | 61.467332 | H | 21.483054 | 5.237075 | 24.051419 |
| C | 43.323243 | 4.099449 | 62.211421 | H | 22.969200 | 5.929476 | 22.278236 |
| C | 44.512078 | 4.711213 | 48.018062 | H | 19.532181 | 2.329570 | 22.589908 |
| C | 45.510007 | 5.461609 | 48.655311 | H | 19.679345 | 1.794079 | 20.190531 |
| O | 43.423980 | 4.253131 | 48.752115 | H | 18.480463 | 3.170787 | 18.536731 |
| O | 46.924974 | 6.450669 | 59.127746 | H | 16.651238 | 6.145298 | 22.827100 |
| O | 46.570133 | 4.245914 | 59.454721 | H | 15.506902 | 7.500972 | 21.165240 |
| C | 46.674786 | 5.448355 | 59.889815 | H | 14.495649 | 7.508305 | 27.087374 |
| C | 16.262162 | 6.620790 | 63.347051 | H | 27.536900 | 7.913089 | 26.963697 |
| C | 15.179196 | 6.168795 | 64.090104 | H | 26.060167 | 6.432519 | 25.712055 |
| C | 14.147156 | 5.478812 | 63.465153 | H | 14.941497 | 3.633966 | 24.311708 |
| C | 12.031150 | 4.336833 | 63.582254 | H | 29.101561 | 2.075233 | 23.084032 |
| C | 13.063191 | 5.025817 | 64.207206 | H | 19.762740 | 6.947516 | 30.306558 |
| O | 10.943187 | 3.908837 | 64.361307 | H | 15.685640 | 4.513286 | 29.277716 |
| C | 31.882275 | 6.620600 | 63.346211 | H | 13.794356 | 3.787752 | 30.593530 |
| C | 30.799322 | 6.168606 | 64.089282 | H | 15.671936 | 6.861120 | 17.596382 |
| C | 29.767267 | 5.478629 | 63.464346 | H | 25.093233 | 6.073070 | 21.446581 |
| C | 27.651260 | 4.336658 | 63.581482 | H | 25.580472 | 2.447964 | 22.879456 |
| C | 28.683314 | 5.025635 | 64.206417 | H | 37.681425 | 2.865490 | 28.325028 |
| O | 26.563309 | 3.908663 | 64.360554 | H | 40.066951 | 2.280631 | 28.421793 |
| C | 47.502389 | 6.620356 | 63.345091 | H | 41.577583 | 2.941448 | 26.620968 |
| C | 46.419447 | 6.168363 | 64.088179 | H | 37.136736 | 5.147561 | 24.075981 |
| C | 45.387379 | 5.478391 | 63.463260 | H | 38.654006 | 5.738231 | 22.287726 |
| C | 43.271369 | 4.336426 | 63.580429 | H | 35.147020 | 2.326247 | 22.590457 |
| C | 44.303437 | 5.025398 | 64.205349 | H | 35.297891 | 1.793062 | 20.190414 |
| O | 42.183431 | 3.908432 | 64.359519 | H | 34.099774 | 3.170458 | 18.536516 |
| H | 12.119263 | 8.127111 | 26.935698 | H | 32.266279 | 6.144216 | 22.826081 |
| H | 10.573018 | 6.786804 | 25.566404 | H | 31.125069 | 7.499683 | 21.165168 |
| H | 13.383790 | 2.323326 | 22.982449 | H | 29.943115 | 7.438148 | 27.115624 |
| H | 9.847415  | 3.169617 | 22.677134 | H | 43.120294 | 7.752991 | 27.059454 |
| H | 22.117458 | 2.845585 | 28.231190 | H | 41.664303 | 6.239886 | 25.828461 |
| H | 24.511394 | 2.283109 | 28.270726 | H | 30.601022 | 3.508339 | 24.339123 |
| H | 25.990486 | 3.037837 | 26.480226 | H | 44.759152 | 1.892325 | 23.243850 |

|   |           |          |           |   |           |          |           |
|---|-----------|----------|-----------|---|-----------|----------|-----------|
| H | 35.579758 | 6.650684 | 30.322141 | H | 18.258871 | 1.953176 | 35.503545 |
| H | 31.335227 | 4.461606 | 29.454055 | H | 17.013473 | 3.360332 | 33.952062 |
| H | 29.433743 | 3.893584 | 30.839554 | H | 15.230492 | 6.211323 | 38.396394 |
| H | 31.291769 | 6.860842 | 17.596364 | H | 13.976956 | 7.566638 | 36.823894 |
| H | 40.786826 | 5.800519 | 21.469260 | H | 13.169224 | 7.512677 | 42.644361 |
| H | 41.233931 | 2.227666 | 23.030653 | H | 26.661390 | 8.581009 | 42.021238 |
| H | 53.552041 | 3.700519 | 28.381408 | H | 25.064378 | 6.955683 | 41.145974 |
| H | 55.987727 | 3.326213 | 28.455772 | H | 13.612048 | 3.633604 | 39.871027 |
| H | 57.384069 | 3.866297 | 26.497838 | H | 27.849846 | 1.950431 | 39.402436 |
| H | 52.703467 | 5.451521 | 24.013878 | H | 18.523076 | 7.019417 | 45.757260 |
| H | 54.081090 | 5.975815 | 22.116738 | H | 19.568975 | 7.508645 | 32.692177 |
| H | 50.777680 | 2.335244 | 22.589490 | H | 17.655769 | 6.733594 | 33.994022 |
| H | 50.920943 | 1.795299 | 20.189760 | H | 14.440425 | 4.559181 | 44.822354 |
| H | 49.720376 | 3.170955 | 18.535920 | H | 12.563942 | 3.859018 | 46.175097 |
| H | 47.862951 | 6.134620 | 22.823813 | H | 12.777882 | 3.616422 | 32.634164 |
| H | 46.741183 | 7.496776 | 21.164945 | H | 13.997299 | 7.185799 | 33.298161 |
| H | 45.538954 | 7.346628 | 27.163395 | H | 24.167002 | 6.396933 | 37.271237 |
| H | 46.244904 | 3.363911 | 24.475087 | H | 24.449688 | 2.411626 | 39.067127 |
| H | 50.975201 | 7.258031 | 30.237917 | H | 36.470343 | 2.724024 | 43.710958 |
| H | 47.069244 | 4.517900 | 29.333898 | H | 38.942297 | 2.301337 | 43.796745 |
| H | 45.240565 | 3.711982 | 30.691772 | H | 40.416818 | 3.190878 | 42.060716 |
| H | 46.913058 | 6.861821 | 17.595763 | H | 35.788291 | 5.238198 | 39.658455 |
| H | 56.056122 | 5.977048 | 21.104138 | H | 37.240195 | 6.070720 | 37.870955 |
| H | 10.791021 | 8.128291 | 42.498132 | H | 33.342020 | 1.999186 | 38.273889 |
| H | 9.244465  | 6.787141 | 41.129873 | H | 33.326661 | 1.442421 | 35.820973 |
| H | 12.055473 | 2.324760 | 38.544531 | H | 32.461543 | 3.040179 | 34.191462 |
| H | 8.519520  | 3.171586 | 38.239143 | H | 31.316887 | 6.363710 | 38.556128 |
| H | 20.771732 | 3.010097 | 43.775773 | H | 30.331646 | 7.927119 | 36.920946 |
| H | 23.164847 | 2.494648 | 43.976310 | H | 29.106497 | 8.016290 | 42.168580 |
| H | 24.752678 | 3.304131 | 42.309063 | H | 41.865044 | 8.106077 | 42.517245 |
| H | 20.394536 | 5.517774 | 39.627895 | H | 40.393781 | 6.617557 | 41.259812 |
| H | 21.995025 | 6.255183 | 37.973626 | H | 29.449284 | 3.548316 | 40.396623 |
| H | 18.235012 | 2.431221 | 37.915008 | H | 43.465264 | 2.321930 | 38.578889 |



|                                |                                |
|--------------------------------|--------------------------------|
| H 34.186960 7.467003 45.705259 | H 19.532367 2.947787 59.264290 |
| H 35.539368 7.165967 32.725055 | H 21.930971 2.402576 59.270991 |
| H 33.636268 6.503746 34.102976 | H 23.383170 3.184795 57.470964 |
| H 30.344476 4.701264 44.778509 | H 18.839323 5.416669 55.140525 |
| H 28.439276 3.897717 46.088233 | H 20.299132 6.133900 53.354374 |
| H 28.464742 3.833403 32.910533 | H 16.930110 2.502919 53.493916 |
| H 30.214279 7.491091 33.501590 | H 17.011176 2.046528 51.081704 |
| H 39.318561 6.258156 37.097374 | H 15.822206 3.479254 49.511193 |
| H 39.929622 2.639366 38.436182 | H 14.012053 6.359277 53.927530 |
| H 52.224044 3.710566 43.948013 | H 12.822804 7.746247 52.331209 |
| H 54.659370 3.328338 44.019961 | H 11.840285 7.509666 58.212242 |
| H 56.055399 3.866546 42.061188 | H 24.892935 7.982479 58.107354 |
| H 51.374587 5.452968 39.579908 | H 23.419180 6.553947 56.794874 |
| H 52.752215 5.975768 37.680112 | H 12.285037 3.636265 55.427063 |
| H 49.657975 2.729818 38.025465 | H 26.465112 2.308844 53.993800 |
| H 49.775656 2.253398 35.617572 | H 17.168049 6.740035 61.410632 |
| H 48.504238 3.593352 34.028309 | H 18.374982 7.592547 48.142373 |
| H 46.481539 6.378375 38.412586 | H 16.483412 6.831094 49.483430 |
| H 45.210331 7.671585 36.800955 | H 13.130650 4.374639 60.400668 |
| H 44.273140 7.659428 42.650227 | H 11.278080 3.574049 61.719314 |
| H 44.961747 3.754899 39.844160 | H 11.570804 3.727467 48.229533 |
| H 49.668268 7.250700 45.876751 | H 12.880085 7.349664 48.807226 |
| H 50.776342 7.865194 32.612967 | H 22.410799 6.286913 52.491585 |
| H 48.935967 6.996909 33.962598 | H 22.942319 2.678182 53.814507 |
| H 45.683221 4.670518 44.845513 | H 35.093493 3.059360 59.311458 |
| H 43.806917 3.896816 46.157170 | H 37.478296 2.463064 59.357432 |
| H 44.256687 3.535541 32.748480 | H 38.957476 3.136362 57.536114 |
| H 45.328373 7.266880 33.278812 | H 34.485230 5.413203 55.111713 |
| H 54.726363 5.972120 36.665797 | H 35.971149 6.014027 53.299517 |
| H 9.463376 8.127065 58.062910  | H 32.527528 2.581390 53.472965 |
| H 7.916939 6.786710 56.693542  | H 32.676107 2.165389 51.057100 |
| H 10.728195 2.325371 54.106771 | H 31.533065 3.624090 49.475795 |
| H 7.191670 3.170580 53.803523  | H 29.582183 6.422122 53.885601 |

|   |           |          |           |   |           |           |           |
|---|-----------|----------|-----------|---|-----------|-----------|-----------|
| H | 28.436938 | 7.830992 | 52.272200 | H | 43.812531 | 7.256522  | 48.880687 |
| H | 27.300356 | 7.510895 | 58.231997 | H | 53.398610 | 5.970725  | 52.227702 |
| H | 40.503248 | 7.816794 | 58.185344 | H | 17.068202 | 7.158106  | 63.835995 |
| H | 39.037609 | 6.404214 | 56.852831 | H | 15.148087 | 6.357279  | 65.155556 |
| H | 27.964651 | 3.696619 | 55.300000 | H | 10.263186 | 3.421785  | 63.797033 |
| H | 42.090235 | 2.174894 | 54.034496 | H | 32.687973 | 7.158489  | 63.835018 |
| H | 32.786990 | 6.741602 | 61.409245 | H | 30.767925 | 6.357365  | 65.154655 |
| H | 33.985256 | 8.050571 | 48.131011 | H | 25.881860 | 3.424237  | 63.795659 |
| H | 32.148006 | 7.156712 | 49.481845 | H | 48.307453 | 7.159242  | 63.833736 |
| H | 28.749597 | 4.374351 | 60.400091 | H | 46.387747 | 6.357331  | 65.153488 |
| H | 26.897771 | 3.574486 | 61.718429 | H | 41.501217 | 3.425243  | 63.794365 |
| H | 27.503025 | 3.733137 | 48.094602 | H | 54.922554 | 4.682770  | 55.325783 |
| H | 28.621331 | 7.496543 | 48.738896 | H | 56.250091 | 4.683121  | 39.763695 |
| H | 38.087821 | 6.065619 | 52.435143 | H | 57.578893 | 4.683400  | 24.200631 |
| H | 38.568779 | 2.548872 | 53.844193 | H | 32.654295 | 5.043337  | 18.026527 |
| H | 50.894908 | 3.700893 | 59.506527 | H | 17.034829 | 5.043579  | 18.026681 |
| H | 53.331588 | 3.325694 | 59.581363 | H | 10.176549 | 4.915316  | 24.089656 |
| H | 54.727853 | 3.865757 | 57.623141 | H | 8.848000  | 4.915616  | 39.653278 |
| H | 50.047658 | 5.459674 | 55.145455 | H | 7.520561  | 4.915577  | 55.216441 |
| H | 51.424872 | 5.977068 | 53.243046 | H | 12.998956 | 5.198997  | 65.269029 |
| H | 48.399288 | 2.790213 | 53.452754 | H | 28.618781 | 5.198983  | 65.268157 |
| H | 48.476489 | 2.355356 | 51.036179 | H | 44.238628 | 5.198846  | 65.267033 |
| H | 47.119766 | 3.669713 | 49.499940 | H | 48.273986 | 5.043155  | 18.026053 |
| H | 45.126124 | 6.337951 | 53.969660 | C | 35.709088 | 8.269142  | 42.621860 |
| H | 43.781076 | 7.615307 | 52.407344 | C | 35.348513 | 8.338489  | 41.123026 |
| H | 42.911875 | 7.363438 | 58.292192 | C | 35.881537 | 9.596468  | 40.434579 |
| H | 43.588384 | 3.556404 | 55.350429 | C | 35.495303 | 10.881874 | 41.184190 |
| H | 48.405484 | 6.745194 | 61.407959 | C | 35.924215 | 10.816365 | 42.659015 |
| H | 49.440701 | 7.826315 | 48.255774 | C | 35.333955 | 9.578766  | 43.350439 |
| H | 47.542096 | 7.006541 | 49.550702 | O | 33.915167 | 8.232468  | 40.958297 |
| H | 44.381550 | 4.364233 | 60.399431 | C | 37.552246 | 7.058501  | 43.810914 |
| H | 42.519372 | 3.571605 | 61.717700 | C | 38.934525 | 7.006793  | 44.100112 |
| H | 42.794680 | 3.691550 | 48.198020 | C | 39.434575 | 6.163177  | 45.090458 |

|            |           |           |           |   |           |          |           |
|------------|-----------|-----------|-----------|---|-----------|----------|-----------|
| C          | 38.574210 | 5.351401  | 45.840278 | C | 22.206542 | 3.934966 | 26.365674 |
| C          | 37.203600 | 5.401014  | 45.567633 | C | 22.752841 | 3.166855 | 27.409571 |
| C          | 36.693349 | 6.232757  | 44.569499 | C | 24.105404 | 2.850215 | 27.429273 |
| N          | 37.097496 | 7.884803  | 42.791227 | C | 24.936125 | 3.290609 | 26.404221 |
| H          | 35.516302 | 9.614686  | 39.392778 | C | 24.426601 | 4.036383 | 25.323887 |
| H          | 35.739216 | 7.435685  | 40.639113 | C | 23.040950 | 4.344212 | 25.287822 |
| H          | 35.098257 | 7.462110  | 43.030217 | C | 22.521905 | 5.019354 | 24.162018 |
| H          | 34.397589 | 11.029610 | 41.128537 | C | 23.363821 | 5.423346 | 23.130892 |
| H          | 35.942624 | 11.759665 | 40.684608 | C | 24.731266 | 5.168922 | 23.188428 |
| H          | 37.030432 | 10.775183 | 42.713928 | C | 25.273589 | 4.464749 | 24.271948 |
| H          | 35.623450 | 11.736377 | 43.191520 | O | 25.561800 | 5.581670 | 22.152390 |
| H          | 34.228745 | 9.663135  | 43.385308 | O | 20.431612 | 5.510011 | 26.191187 |
| H          | 35.664230 | 9.508331  | 44.401797 | O | 19.905977 | 3.363359 | 26.646902 |
| H          | 36.984945 | 9.517651  | 40.383012 | C | 20.762736 | 4.290717 | 26.413706 |
| H          | 39.619776 | 7.643540  | 43.530531 | C | 18.226927 | 4.022014 | 22.293999 |
| H          | 40.513529 | 6.145804  | 45.279071 | C | 18.992915 | 2.941012 | 21.873981 |
| H          | 38.964533 | 4.693934  | 46.622796 | C | 19.081890 | 2.638017 | 20.519979 |
| H          | 36.505405 | 4.775579  | 46.134518 | C | 18.404876 | 3.417024 | 19.587993 |
| H          | 35.623942 | 6.211645  | 44.360050 | C | 17.639888 | 4.497025 | 20.008011 |
| H          | 37.791627 | 8.521230  | 42.415214 | C | 17.550913 | 4.800019 | 21.362013 |
| H          | 33.461246 | 8.944518  | 41.441203 | C | 16.783924 | 5.881020 | 21.784030 |
|            |           |           |           | C | 16.107910 | 6.659026 | 20.850045 |
|            |           |           |           | C | 16.197885 | 6.355032 | 19.497042 |
| (S,S)-2-RC |           |           |           | C | 16.963876 | 5.274031 | 19.076025 |
| C          | 12.487000 | 7.261000  | 26.395000 | O | 15.523872 | 7.185038 | 18.539057 |
| C          | 11.616000 | 6.503000  | 25.622000 | O | 18.564689 | 5.526651 | 24.113591 |
| C          | 12.086000 | 5.395000  | 24.927000 | O | 18.015305 | 3.386616 | 24.572694 |
| C          | 13.428000 | 5.043000  | 25.007000 | C | 18.262064 | 4.334813 | 23.745719 |
| C          | 13.027000 | 3.179000  | 23.539000 | C | 14.301000 | 5.801000 | 25.782000 |
| C          | 11.685000 | 3.529000  | 23.460000 | C | 13.829000 | 6.909000 | 26.476000 |
| C          | 11.215000 | 4.638000  | 24.154000 | C | 27.921596 | 7.012383 | 26.498605 |
| O          | 10.782000 | 2.793000  | 22.654000 | C | 27.089388 | 6.172775 | 25.766734 |
| Cu         | 18.542604 | 6.080804  | 26.017860 | C | 27.604741 | 5.066077 | 25.060449 |
| Cu         | 17.945156 | 3.693243  | 26.528115 |   |           |          |           |

|    |           |          |           |   |           |          |           |
|----|-----------|----------|-----------|---|-----------|----------|-----------|
| C  | 29.000675 | 4.807811 | 25.111005 | C | 33.846855 | 4.021974 | 22.293721 |
| C  | 13.900000 | 3.935000 | 24.313000 | C | 34.612832 | 2.940971 | 21.873686 |
| C  | 28.681304 | 2.933069 | 23.600660 | C | 34.701783 | 2.637980 | 20.519681 |
| C  | 27.313722 | 3.148515 | 23.575408 | C | 34.024755 | 3.416991 | 19.587710 |
| C  | 26.750707 | 4.219167 | 24.305905 | C | 33.259777 | 4.496993 | 20.007743 |
| O  | 26.549847 | 2.257745 | 22.824105 | C | 33.170827 | 4.799985 | 21.361749 |
| O  | 16.596355 | 6.401188 | 25.851453 | C | 32.403849 | 5.880988 | 21.783783 |
| O  | 16.052131 | 4.262729 | 26.321216 | C | 31.727822 | 6.658998 | 20.849812 |
| C  | 15.734914 | 5.460913 | 25.985814 | C | 31.817772 | 6.355006 | 19.496807 |
| C  | 17.918646 | 5.810661 | 30.232743 | C | 32.583750 | 5.274004 | 19.075773 |
| C  | 18.906546 | 6.585253 | 30.867895 | O | 31.143744 | 7.185017 | 18.538837 |
| C  | 16.778716 | 5.388236 | 30.972679 | O | 34.106947 | 5.506772 | 24.155837 |
| C  | 15.706645 | 4.703946 | 30.360688 | O | 33.614634 | 3.346379 | 24.572605 |
| C  | 14.614481 | 4.285070 | 31.114523 | C | 33.847209 | 4.313167 | 23.760142 |
| O  | 18.430310 | 6.396302 | 27.978444 | C | 29.838027 | 5.640797 | 25.903407 |
| O  | 17.896422 | 4.251250 | 28.430781 | C | 29.283302 | 6.751013 | 26.564837 |
| C  | 18.097165 | 5.464991 | 28.796416 | C | 43.546493 | 6.890997 | 26.604256 |
| Cu | 34.094490 | 6.015711 | 26.078803 | C | 42.717645 | 6.032277 | 25.893320 |
| Cu | 33.535742 | 3.611502 | 26.544630 | C | 43.237932 | 4.918631 | 25.202100 |
| C  | 37.792657 | 3.899126 | 26.434972 | C | 44.637898 | 4.671947 | 25.246830 |
| C  | 38.308307 | 3.149412 | 27.508012 | C | 29.525347 | 3.746717 | 24.345715 |
| C  | 39.654543 | 2.812836 | 27.562968 | C | 44.318150 | 2.757949 | 23.788491 |
| C  | 40.511271 | 3.213016 | 26.543626 | C | 42.949634 | 2.972672 | 23.756274 |
| C  | 40.035174 | 3.941726 | 25.437156 | C | 42.384628 | 4.059558 | 24.460521 |
| C  | 38.655606 | 4.276063 | 25.368602 | O | 42.186552 | 2.065472 | 23.024203 |
| C  | 38.171156 | 4.941773 | 24.223177 | O | 32.127683 | 6.316502 | 25.962676 |
| C  | 39.039745 | 5.301987 | 23.197272 | O | 31.636646 | 4.152644 | 26.367225 |
| C  | 40.400364 | 5.015558 | 23.282316 | C | 31.286479 | 5.354458 | 26.086205 |
| C  | 40.910062 | 4.326174 | 24.391248 | C | 33.590807 | 5.642979 | 30.305854 |
| O  | 41.257031 | 5.386686 | 22.251785 | C | 34.660806 | 6.300433 | 30.939331 |
| O  | 35.999972 | 5.460752 | 26.212832 | C | 32.431419 | 5.310016 | 31.060423 |
| O  | 35.496995 | 3.306952 | 26.659065 | C | 31.295546 | 4.733883 | 30.455542 |
| C  | 36.344730 | 4.244759 | 26.439946 | C | 30.168374 | 4.435775 | 31.217139 |

|    |           |          |           |    |           |          |           |
|----|-----------|----------|-----------|----|-----------|----------|-----------|
| O  | 34.017741 | 6.282866 | 28.050095 | C  | 45.477259 | 5.542688 | 25.994839 |
| O  | 33.484195 | 4.129753 | 28.464636 | C  | 44.912396 | 6.652308 | 26.650458 |
| C  | 33.706735 | 5.332529 | 28.854586 | C  | 45.163102 | 3.591641 | 24.511292 |
| Cu | 49.696061 | 6.210735 | 25.980132 | O  | 47.715105 | 6.344562 | 25.885713 |
| Cu | 49.343764 | 3.794733 | 26.566442 | O  | 47.393958 | 4.177754 | 26.423292 |
| C  | 53.571004 | 4.464799 | 26.367945 | C  | 46.948360 | 5.338905 | 26.102242 |
| C  | 54.157059 | 3.947781 | 27.515908 | C  | 49.204368 | 6.011091 | 30.213421 |
| C  | 55.530060 | 3.732767 | 27.559832 | C  | 50.150565 | 6.854156 | 30.823842 |
| C  | 56.316003 | 4.036770 | 26.454793 | C  | 48.090875 | 5.548018 | 30.968222 |
| C  | 55.729947 | 4.554788 | 25.305829 | C  | 47.059172 | 4.788171 | 30.377231 |
| C  | 54.356948 | 4.768802 | 25.262905 | C  | 45.986270 | 4.340719 | 31.141610 |
| C  | 53.770890 | 5.287820 | 24.113942 | O  | 49.610217 | 6.576767 | 27.933224 |
| C  | 54.557834 | 5.591822 | 23.007903 | O  | 49.298221 | 4.404046 | 28.456609 |
| C  | 55.929834 | 5.377808 | 23.052827 | C  | 49.389849 | 5.641895 | 28.784119 |
| C  | 56.515890 | 4.858790 | 24.200790 | C  | 11.158284 | 7.260965 | 41.959133 |
| O  | 56.643771 | 5.617813 | 21.841791 | C  | 10.287267 | 6.502972 | 41.186144 |
| O  | 51.638259 | 5.839775 | 26.119443 | C  | 10.757252 | 5.394972 | 40.491132 |
| O  | 51.333691 | 3.664694 | 26.637563 | C  | 12.099252 | 5.042967 | 40.571107 |
| C  | 52.092830 | 4.668980 | 26.380336 | C  | 11.698220 | 3.178974 | 39.103108 |
| C  | 49.466780 | 4.021882 | 22.293161 | C  | 10.356220 | 3.528979 | 39.024133 |
| C  | 50.232747 | 2.940878 | 21.873109 | C  | 9.886236  | 4.637978 | 39.718145 |
| C  | 50.321671 | 2.637891 | 20.519101 | O  | 9.453203  | 2.792985 | 38.218146 |
| C  | 49.644629 | 3.416907 | 19.587145 | Cu | 17.236845 | 6.153087 | 41.521484 |
| C  | 48.879663 | 4.496911 | 20.007197 | Cu | 16.684702 | 3.753959 | 42.019410 |
| C  | 48.790739 | 4.799899 | 21.361205 | C  | 20.946793 | 4.097845 | 42.060436 |
| C  | 48.023773 | 5.880903 | 21.783256 | C  | 21.424340 | 3.484982 | 43.233180 |
| C  | 47.347732 | 6.658919 | 20.849300 | C  | 22.769747 | 3.173342 | 43.380492 |
| C  | 47.437657 | 6.354932 | 19.496292 | C  | 23.661428 | 3.445696 | 42.349235 |
| C  | 48.203622 | 5.273928 | 19.075240 | C  | 23.224070 | 4.026902 | 41.144849 |
| O  | 46.763615 | 7.184949 | 18.538336 | C  | 21.851428 | 4.366649 | 40.995906 |
| O  | 49.730625 | 5.592594 | 24.088213 | C  | 21.415723 | 4.927689 | 39.777667 |
| O  | 49.383905 | 3.428232 | 24.610412 | C  | 22.319294 | 5.137712 | 38.738011 |
| C  | 49.524724 | 4.369678 | 23.750007 | C  | 23.662167 | 4.796908 | 38.879810 |

|   |           |          |           |    |           |          |           |
|---|-----------|----------|-----------|----|-----------|----------|-----------|
| C | 24.125568 | 4.250636 | 40.080400 | C  | 16.641140 | 5.852035 | 45.741256 |
| O | 24.538930 | 4.947093 | 37.814958 | C  | 17.633816 | 6.629839 | 46.365382 |
| O | 19.146506 | 5.620477 | 41.694397 | C  | 18.810011 | 6.898559 | 32.217248 |
| O | 18.650596 | 3.471728 | 42.173902 | C  | 17.722586 | 6.448026 | 32.956900 |
| C | 19.495529 | 4.416551 | 41.970219 | C  | 16.696531 | 5.692263 | 32.357373 |
| C | 16.953164 | 4.132024 | 37.776379 | C  | 15.513627 | 5.422721 | 46.496256 |
| C | 17.679470 | 3.039131 | 37.271506 | C  | 14.438887 | 4.731276 | 45.898104 |
| C | 17.700679 | 2.766696 | 35.910560 | C  | 13.355433 | 4.312652 | 46.664561 |
| C | 16.992478 | 3.577384 | 35.030317 | C  | 14.557124 | 4.534403 | 32.483229 |
| C | 16.227109 | 4.667776 | 35.494108 | C  | 15.584032 | 5.249068 | 33.114255 |
| C | 16.189850 | 4.937658 | 36.887833 | O  | 13.461302 | 4.107531 | 33.225053 |
| C | 15.368181 | 5.981711 | 37.358676 | O  | 17.126213 | 6.454118 | 43.485497 |
| C | 14.645031 | 6.763362 | 36.466982 | O  | 16.607284 | 4.303481 | 43.926341 |
| C | 14.703916 | 6.537082 | 35.102131 | C  | 16.803265 | 5.515827 | 44.299624 |
| C | 15.500035 | 5.487207 | 34.590761 | Cu | 33.052600 | 6.010739 | 41.498439 |
| O | 13.973038 | 7.400980 | 34.289218 | Cu | 32.427671 | 3.558407 | 42.047074 |
| O | 17.269442 | 5.612456 | 39.613045 | C  | 36.600010 | 3.692059 | 41.750843 |
| O | 16.789694 | 3.452766 | 40.055222 | C  | 37.122979 | 2.737583 | 42.603479 |
| C | 17.010563 | 4.414061 | 39.234226 | C  | 38.502521 | 2.437875 | 42.564266 |
| C | 12.972269 | 5.800962 | 41.346096 | C  | 39.333030 | 3.078611 | 41.669511 |
| C | 12.500284 | 6.908961 | 42.040108 | C  | 38.833220 | 4.044171 | 40.735523 |
| C | 26.938699 | 7.124340 | 41.712151 | C  | 37.424571 | 4.343651 | 40.774779 |
| C | 26.045786 | 6.183824 | 41.238924 | C  | 36.893953 | 5.246654 | 39.808646 |
| C | 26.473686 | 4.902396 | 40.760038 | C  | 37.711203 | 5.842814 | 38.878639 |
| C | 27.882449 | 4.602843 | 40.839204 | C  | 39.110410 | 5.597223 | 38.866590 |
| C | 12.571236 | 3.934968 | 39.877095 | C  | 39.673519 | 4.704463 | 39.776051 |
| C | 27.454955 | 2.436277 | 39.820202 | O  | 39.902209 | 6.233340 | 37.958456 |
| C | 26.063843 | 2.717612 | 39.746773 | O  | 34.853507 | 5.270106 | 41.878971 |
| C | 25.566826 | 3.934607 | 40.203650 | O  | 34.330602 | 3.083054 | 41.987693 |
| O | 25.335810 | 1.700210 | 39.204451 | C  | 35.152349 | 4.041868 | 41.880834 |
| O | 15.272366 | 6.437050 | 41.372772 | C  | 32.616438 | 3.914344 | 37.835221 |
| O | 14.774421 | 4.282632 | 41.811000 | C  | 33.189128 | 2.755263 | 37.344866 |
| C | 14.425435 | 5.481663 | 41.509807 | C  | 33.166336 | 2.497531 | 35.957550 |

|   |           |          |           |    |           |          |           |
|---|-----------|----------|-----------|----|-----------|----------|-----------|
| C | 32.546316 | 3.375908 | 35.093374 | C  | 30.144724 | 4.690061 | 32.586418 |
| C | 31.904200 | 4.570878 | 35.556090 | C  | 31.253009 | 5.268048 | 33.213932 |
| C | 31.953182 | 4.841620 | 36.969039 | O  | 29.004444 | 4.409272 | 33.328334 |
| C | 31.298763 | 6.007138 | 37.465838 | O  | 32.733775 | 6.306693 | 43.439944 |
| C | 30.623528 | 6.848282 | 36.617719 | O  | 32.561253 | 4.115161 | 43.929637 |
| C | 30.564693 | 6.586302 | 35.222178 | C  | 32.559155 | 5.342291 | 44.240655 |
| C | 31.215230 | 5.483288 | 34.679335 | Cu | 48.436743 | 6.379610 | 41.586319 |
| O | 29.835880 | 7.515726 | 34.532141 | Cu | 48.002556 | 3.947540 | 42.043806 |
| O | 33.190287 | 5.302908 | 39.649722 | C  | 52.242277 | 4.464616 | 41.931345 |
| O | 32.305762 | 3.278099 | 40.087956 | C  | 52.828352 | 3.947593 | 43.079296 |
| C | 32.709666 | 4.184985 | 39.302063 | C  | 54.201352 | 3.732573 | 43.123194 |
| C | 28.779744 | 5.591451 | 41.363538 | C  | 54.987277 | 4.036578 | 42.018142 |
| C | 28.319415 | 6.837137 | 41.758034 | C  | 54.401202 | 4.554601 | 40.869191 |
| C | 42.258542 | 7.080916 | 42.229427 | C  | 53.028202 | 4.768621 | 40.826292 |
| C | 41.439740 | 6.298579 | 41.423303 | C  | 52.442128 | 5.287645 | 39.677341 |
| C | 41.975328 | 5.283697 | 40.605140 | C  | 53.229054 | 5.591649 | 38.571289 |
| C | 43.376734 | 5.048327 | 40.626964 | C  | 54.601054 | 5.377629 | 38.616189 |
| C | 28.337832 | 3.345583 | 40.342879 | C  | 55.187129 | 4.858606 | 39.764139 |
| C | 43.080372 | 3.310358 | 38.959114 | O  | 55.314970 | 5.617636 | 37.405141 |
| C | 41.710115 | 3.513933 | 38.947086 | O  | 50.364749 | 5.921698 | 41.727808 |
| C | 41.139184 | 4.504893 | 39.769492 | O  | 49.978815 | 3.742855 | 42.172756 |
| O | 40.954127 | 2.692217 | 38.115532 | C  | 50.774325 | 4.725828 | 41.954697 |
| O | 31.056278 | 6.216128 | 41.197375 | C  | 48.273063 | 4.392816 | 37.803992 |
| O | 30.558491 | 4.191255 | 42.038541 | C  | 49.062176 | 3.337762 | 37.311546 |
| C | 30.240584 | 5.311338 | 41.536725 | C  | 49.122031 | 3.066590 | 35.951601 |
| C | 32.345526 | 5.688884 | 45.680101 | C  | 48.391390 | 3.840942 | 35.057829 |
| C | 33.180004 | 6.638027 | 46.242282 | C  | 47.565488 | 4.892717 | 35.506170 |
| C | 34.620856 | 6.584411 | 32.298127 | C  | 47.491504 | 5.162948 | 36.899488 |
| C | 33.505992 | 6.228410 | 33.048441 | C  | 46.612868 | 6.166525 | 37.353326 |
| C | 32.397782 | 5.597834 | 32.451912 | C  | 45.866042 | 6.908438 | 36.446948 |
| C | 31.316571 | 5.058484 | 46.455127 | C  | 45.956205 | 6.680596 | 35.083587 |
| C | 30.388806 | 4.138130 | 45.888170 | C  | 46.810361 | 5.669559 | 34.587870 |
| C | 29.402061 | 3.567757 | 46.656171 | O  | 45.196846 | 7.505193 | 34.256125 |

|    |           |          |           |   |           |          |           |
|----|-----------|----------|-----------|---|-----------|----------|-----------|
| O  | 48.473197 | 5.872404 | 39.663934 | C | 19.585105 | 3.974745 | 57.469344 |
| O  | 48.112197 | 3.683999 | 40.074236 | C | 20.123355 | 3.234833 | 58.537532 |
| C  | 48.286259 | 4.666017 | 39.266652 | C | 21.472664 | 2.905746 | 58.568816 |
| C  | 44.203269 | 5.828569 | 41.480269 | C | 22.307244 | 3.299895 | 57.528360 |
| C  | 43.627565 | 6.852842 | 42.253383 | C | 21.806126 | 4.016684 | 56.424777 |
| C  | 43.915941 | 4.062798 | 39.777164 | C | 20.425033 | 4.346940 | 56.383260 |
| O  | 46.461497 | 6.585889 | 41.475920 | C | 19.914799 | 5.005917 | 55.244953 |
| O  | 46.072603 | 4.395932 | 41.854362 | C | 20.758955 | 5.357075 | 54.196092 |
| C  | 45.665558 | 5.587952 | 41.605306 | C | 22.120914 | 5.070685 | 54.251625 |
| C  | 47.867935 | 5.995079 | 45.794949 | C | 22.656905 | 4.393803 | 55.355946 |
| C  | 48.835242 | 6.787715 | 46.439768 | O | 22.952469 | 5.428817 | 53.196458 |
| C  | 50.040047 | 7.196904 | 32.165529 | O | 17.799679 | 5.544357 | 57.298140 |
| C  | 48.978914 | 6.709307 | 32.920816 | O | 17.287689 | 3.381181 | 57.687555 |
| C  | 47.992659 | 5.886117 | 32.344232 | C | 18.138823 | 4.321971 | 57.495440 |
| C  | 46.732032 | 5.546878 | 46.525428 | C | 15.653737 | 4.164450 | 53.332324 |
| C  | 45.684591 | 4.833082 | 45.905722 | C | 16.383978 | 3.071213 | 52.832615 |
| C  | 44.591906 | 4.397169 | 46.649264 | C | 16.429380 | 2.807295 | 51.470527 |
| C  | 45.912132 | 4.629391 | 32.501949 | C | 15.741175 | 3.626282 | 50.582582 |
| C  | 46.903619 | 5.408197 | 33.114493 | C | 14.974376 | 4.718433 | 51.038940 |
| O  | 44.836513 | 4.171569 | 33.254524 | C | 14.916728 | 4.983290 | 52.433915 |
| O  | 48.336694 | 6.643533 | 43.552968 | C | 14.097220 | 6.032307 | 52.895722 |
| O  | 47.910849 | 4.465747 | 43.961883 | C | 13.392593 | 6.821192 | 51.995310 |
| C  | 48.054206 | 5.680709 | 44.352260 | C | 13.467597 | 6.596587 | 50.630569 |
| C  | 9.830844  | 7.260885 | 57.522289 | C | 14.262125 | 5.541629 | 50.127142 |
| C  | 8.959813  | 6.502896 | 56.749314 | O | 12.751590 | 7.465464 | 49.809771 |
| C  | 9.429780  | 5.394897 | 56.054290 | O | 15.945429 | 5.609925 | 55.206327 |
| C  | 10.771780 | 5.042887 | 56.134240 | O | 15.422086 | 3.449794 | 55.593073 |
| C  | 10.370715 | 3.178901 | 54.666241 | C | 15.675329 | 4.423363 | 54.796721 |
| C  | 9.028715  | 3.528910 | 54.587291 | C | 11.644813 | 5.800876 | 56.909215 |
| C  | 8.558747  | 4.637908 | 55.281315 | C | 11.172845 | 6.908875 | 57.603239 |
| O  | 8.125681  | 2.792922 | 53.781316 | C | 25.329153 | 6.954193 | 57.534585 |
| Cu | 15.900747 | 6.105487 | 57.131383 | C | 24.490420 | 6.108150 | 56.819242 |
| Cu | 15.327798 | 3.699340 | 57.564204 | C | 24.995820 | 4.981634 | 56.137934 |



|    |           |          |           |   |           |          |           |
|----|-----------|----------|-----------|---|-----------|----------|-----------|
| C  | 26.390261 | 4.710361 | 56.195785 | C | 37.730748 | 4.972841 | 54.217304 |
| C  | 11.243748 | 3.934890 | 55.440215 | C | 38.281175 | 4.341981 | 55.341834 |
| C  | 26.053730 | 2.815726 | 54.715589 | O | 38.551180 | 5.297266 | 53.142885 |
| C  | 24.687799 | 3.044371 | 54.683696 | O | 33.401518 | 5.505915 | 57.274214 |
| C  | 24.133065 | 4.131143 | 55.396864 | O | 32.953343 | 3.345663 | 57.749071 |
| O  | 23.916606 | 2.147306 | 53.947660 | C | 33.776307 | 4.301335 | 57.515777 |
| O  | 13.946154 | 6.416953 | 56.971307 | C | 31.357784 | 3.936297 | 53.381045 |
| O  | 13.425641 | 4.261667 | 57.379293 | C | 32.184758 | 2.882297 | 52.952697 |
| C  | 13.090920 | 5.467636 | 57.088820 | C | 32.310897 | 2.576915 | 51.604464 |
| C  | 15.283042 | 5.695809 | 61.352094 | C | 31.602676 | 3.309470 | 50.658772 |
| C  | 16.314083 | 6.385792 | 61.978046 | C | 30.735215 | 4.351379 | 51.042780 |
| C  | 17.552948 | 6.942485 | 47.715878 | C | 30.606127 | 4.668344 | 52.422397 |
| C  | 16.476404 | 6.488166 | 48.469020 | C | 29.708695 | 5.683209 | 52.807973 |
| C  | 15.445686 | 5.729405 | 47.881978 | C | 28.989543 | 6.384123 | 51.846430 |
| C  | 14.198077 | 5.242813 | 62.095147 | C | 29.122634 | 6.098827 | 50.497526 |
| C  | 13.166036 | 4.552830 | 61.469195 | C | 29.996216 | 5.076348 | 50.077359 |
| C  | 12.083071 | 4.099834 | 62.213248 | O | 28.378043 | 6.871268 | 49.610205 |
| C  | 13.309308 | 4.569687 | 48.032519 | O | 31.519049 | 5.464734 | 55.205780 |
| C  | 14.340688 | 5.288769 | 48.651550 | O | 31.093032 | 3.296085 | 55.659159 |
| O  | 12.219830 | 4.146227 | 48.785582 | C | 31.314910 | 4.252743 | 54.833755 |
| O  | 15.771247 | 6.360947 | 59.104256 | C | 27.235826 | 5.554473 | 56.967878 |
| O  | 15.271258 | 4.195680 | 59.486078 | C | 26.687963 | 6.681852 | 57.606991 |
| C  | 15.449027 | 5.400356 | 59.893758 | C | 40.898590 | 6.911579 | 57.571831 |
| Cu | 31.481747 | 6.011103 | 57.120208 | C | 40.080078 | 6.064437 | 56.836512 |
| Cu | 30.987353 | 3.600154 | 57.621228 | C | 40.608487 | 4.957378 | 56.140342 |
| C  | 35.230379 | 3.987301 | 57.497451 | C | 42.008431 | 4.712346 | 56.196341 |
| C  | 35.785264 | 3.299507 | 58.591910 | C | 26.904937 | 3.630222 | 55.452000 |
| C  | 37.136258 | 2.979072 | 58.623262 | C | 41.708145 | 2.827581 | 54.696307 |
| C  | 37.956769 | 3.330196 | 57.557219 | C | 40.338291 | 3.031654 | 54.663733 |
| C  | 37.441148 | 4.000143 | 56.431047 | C | 39.762212 | 4.101582 | 55.385880 |
| C  | 36.057585 | 4.321180 | 56.389515 | O | 39.585144 | 2.124541 | 53.921397 |
| C  | 35.533001 | 4.931482 | 55.231115 | O | 29.512555 | 6.262134 | 56.989475 |
| C  | 36.365960 | 5.246407 | 54.161807 | O | 29.069860 | 4.094517 | 57.426923 |

|    |           |          |           |   |           |          |           |
|----|-----------|----------|-----------|---|-----------|----------|-----------|
| C  | 28.691651 | 5.286245 | 57.134177 | C | 47.806264 | 3.054751 | 51.441558 |
| C  | 30.903116 | 5.695628 | 61.351271 | C | 47.041721 | 3.817474 | 50.566805 |
| C  | 31.934171 | 6.385605 | 61.977208 | C | 46.200813 | 4.848142 | 51.036648 |
| C  | 33.065110 | 6.957125 | 47.612795 | C | 46.140248 | 5.102971 | 52.433348 |
| C  | 32.102105 | 6.353314 | 48.392802 | C | 45.246566 | 6.082747 | 52.909302 |
| C  | 31.182313 | 5.397734 | 47.849832 | C | 44.474474 | 6.819860 | 52.020469 |
| C  | 29.818163 | 5.242633 | 62.094342 | C | 44.552280 | 6.609309 | 50.653618 |
| C  | 28.786109 | 4.552656 | 61.468406 | C | 45.419977 | 5.620519 | 50.135746 |
| C  | 27.703155 | 4.099663 | 62.212477 | O | 43.771824 | 7.433472 | 49.845624 |
| C  | 29.278695 | 3.873518 | 48.038013 | O | 47.118501 | 5.782472 | 55.213099 |
| C  | 30.148435 | 4.784276 | 48.634938 | O | 46.813645 | 3.575388 | 55.567225 |
| O  | 28.300877 | 3.282354 | 48.779004 | C | 46.961434 | 4.581792 | 54.785728 |
| O  | 31.374188 | 6.316643 | 59.087073 | C | 42.836043 | 5.565222 | 56.978433 |
| O  | 30.920266 | 4.151634 | 59.526595 | C | 42.261547 | 6.666094 | 57.640995 |
| C  | 31.076095 | 5.369964 | 59.901740 | C | 42.543983 | 3.651955 | 55.439470 |
| Cu | 47.045961 | 6.237451 | 57.147473 | O | 45.071126 | 6.377092 | 57.016963 |
| Cu | 46.692050 | 3.781257 | 57.539289 | O | 44.746545 | 4.171803 | 57.358758 |
| C  | 50.914826 | 4.464382 | 57.493755 | C | 44.304035 | 5.354083 | 57.119893 |
| C  | 51.500920 | 3.947352 | 58.641694 | C | 46.523192 | 5.695393 | 61.350166 |
| C  | 52.873920 | 3.732327 | 58.685568 | C | 47.554258 | 6.385364 | 61.976087 |
| C  | 53.659827 | 4.036331 | 57.580503 | C | 48.718636 | 7.102466 | 47.786957 |
| C  | 53.073733 | 4.554362 | 56.431564 | C | 47.630743 | 6.636063 | 48.515318 |
| C  | 51.700733 | 4.768387 | 56.388690 | C | 46.627725 | 5.855798 | 47.908199 |
| C  | 51.114640 | 5.287417 | 55.239751 | C | 45.438249 | 5.242399 | 62.093255 |
| C  | 51.901547 | 5.591423 | 54.133687 | C | 44.406182 | 4.552428 | 61.467335 |
| C  | 53.273547 | 5.377397 | 54.178561 | C | 43.323240 | 4.099435 | 62.211424 |
| C  | 53.859639 | 4.858367 | 55.326499 | C | 44.512630 | 4.653434 | 48.015982 |
| O  | 53.987443 | 5.617405 | 52.967501 | C | 45.517589 | 5.391421 | 48.656489 |
| O  | 48.987924 | 5.853759 | 57.299199 | O | 43.417496 | 4.207378 | 48.747060 |
| O  | 48.676956 | 3.649145 | 57.671581 | O | 46.915472 | 6.437660 | 59.120425 |
| C  | 49.438187 | 4.668585 | 57.497746 | O | 46.580486 | 4.232682 | 59.466731 |
| C  | 46.950973 | 4.340880 | 53.318489 | C | 46.676190 | 5.439505 | 59.891480 |
| C  | 47.760311 | 3.312025 | 52.804196 | C | 16.262158 | 6.620778 | 63.347051 |

|   |           |          |           |   |           |          |           |
|---|-----------|----------|-----------|---|-----------|----------|-----------|
| C | 15.179191 | 6.168782 | 64.090104 | H | 26.034406 | 6.406427 | 25.743299 |
| C | 14.147152 | 5.478800 | 63.465152 | H | 14.941553 | 3.634216 | 24.311118 |
| C | 12.031146 | 4.336820 | 63.582253 | H | 29.091273 | 2.114664 | 23.024046 |
| C | 13.063187 | 5.025805 | 64.207205 | H | 19.765835 | 6.935191 | 30.307186 |
| O | 10.943183 | 3.908824 | 64.361306 | H | 15.687082 | 4.494840 | 29.296566 |
| C | 31.882271 | 6.620587 | 63.346214 | H | 13.807980 | 3.757351 | 30.623689 |
| C | 30.799317 | 6.168593 | 64.089284 | H | 15.672081 | 6.861159 | 17.596383 |
| C | 29.767262 | 5.478616 | 63.464348 | H | 25.065073 | 6.108832 | 21.449927 |
| C | 27.651255 | 4.336645 | 63.581483 | H | 25.568548 | 2.478331 | 22.829285 |
| C | 28.683309 | 5.025622 | 64.206418 | H | 37.653893 | 2.832460 | 28.312185 |
| O | 26.563304 | 3.908650 | 64.360554 | H | 40.037173 | 2.239019 | 28.401431 |
| C | 47.502385 | 6.620342 | 63.345096 | H | 41.554058 | 2.935478 | 26.619097 |
| C | 46.419443 | 6.168348 | 64.088184 | H | 37.120687 | 5.182362 | 24.097231 |
| C | 45.387375 | 5.478376 | 63.463264 | H | 38.645195 | 5.814729 | 22.330451 |
| C | 43.271365 | 4.336411 | 63.580432 | H | 35.146557 | 2.326071 | 22.590618 |
| C | 44.303433 | 5.025383 | 64.205353 | H | 35.298074 | 1.793203 | 20.190391 |
| O | 42.183428 | 3.908416 | 64.359522 | H | 34.099851 | 3.170529 | 18.536505 |
| H | 12.119250 | 8.127011 | 26.935853 | H | 32.264686 | 6.144363 | 22.825705 |
| H | 10.573020 | 6.786799 | 25.566434 | H | 31.124857 | 7.499511 | 21.165261 |
| H | 13.383931 | 2.323438 | 22.982376 | H | 29.916621 | 7.406040 | 27.152061 |
| H | 9.847427  | 3.169674 | 22.677234 | H | 43.126468 | 7.748881 | 27.120122 |
| H | 22.119739 | 2.825458 | 28.220650 | H | 41.660518 | 6.256185 | 25.876087 |
| H | 24.514489 | 2.264525 | 28.246708 | H | 30.587679 | 3.536492 | 24.297229 |
| H | 25.984923 | 3.030430 | 26.453762 | H | 44.728506 | 1.926152 | 23.231806 |
| H | 21.464154 | 5.233112 | 24.053066 | H | 35.538928 | 6.581727 | 30.369169 |
| H | 22.942488 | 5.943533 | 22.281294 | H | 31.256091 | 4.523000 | 29.390993 |
| H | 19.531862 | 2.329397 | 22.589992 | H | 29.305648 | 4.001836 | 30.729206 |
| H | 19.679339 | 1.794077 | 20.190537 | H | 31.291573 | 6.860683 | 17.596375 |
| H | 18.480480 | 3.170812 | 18.536729 | H | 40.782853 | 5.904131 | 21.527010 |
| H | 16.651775 | 6.145500 | 22.827140 | H | 41.202676 | 2.274268 | 23.042215 |
| H | 15.507006 | 7.501005 | 21.165356 | H | 53.551983 | 3.700495 | 28.381354 |
| H | 14.495545 | 7.507994 | 27.087822 | H | 55.987720 | 3.326194 | 28.455768 |
| H | 27.505873 | 7.866170 | 27.024549 | H | 57.384079 | 3.866363 | 26.497857 |

|   |           |          |           |   |           |          |           |
|---|-----------|----------|-----------|---|-----------|----------|-----------|
| H | 52.703486 | 5.451570 | 24.013810 | H | 18.484201 | 6.984614 | 45.794044 |
| H | 54.081054 | 5.975801 | 22.116753 | H | 19.585592 | 7.489084 | 32.695372 |
| H | 50.777442 | 2.335151 | 22.589578 | H | 17.682122 | 6.707309 | 34.006261 |
| H | 50.920840 | 1.795227 | 20.189777 | H | 14.410416 | 4.516792 | 44.835175 |
| H | 49.720360 | 3.170968 | 18.535922 | H | 12.545992 | 3.780129 | 46.183763 |
| H | 47.862113 | 6.134484 | 22.823685 | H | 12.808077 | 3.573726 | 32.671542 |
| H | 46.741031 | 7.496634 | 21.165065 | H | 14.039340 | 7.172571 | 33.312089 |
| H | 45.544514 | 7.334360 | 27.207620 | H | 24.138956 | 5.490071 | 37.060593 |
| H | 46.225623 | 3.380004 | 24.471960 | H | 24.394496 | 1.916744 | 39.112036 |
| H | 50.986692 | 7.236450 | 30.249518 | H | 36.462173 | 2.236637 | 43.315798 |
| H | 47.057307 | 4.540170 | 29.321182 | H | 38.915030 | 1.694564 | 43.253783 |
| H | 45.209019 | 3.757841 | 30.666138 | H | 40.398382 | 2.827522 | 41.671534 |
| H | 46.912778 | 6.861599 | 17.595787 | H | 35.825142 | 5.463271 | 39.791075 |
| H | 56.056012 | 5.977143 | 21.104276 | H | 37.281337 | 6.525893 | 38.136189 |
| H | 10.790932 | 8.127996 | 42.498529 | H | 33.668664 | 2.056659 | 38.035714 |
| H | 9.244452  | 6.787085 | 41.129922 | H | 33.639884 | 1.592027 | 35.565003 |
| H | 12.055774 | 2.325370 | 38.543778 | H | 32.541640 | 3.131683 | 34.026296 |
| H | 8.519752  | 3.172219 | 38.238431 | H | 31.321427 | 6.231121 | 38.533899 |
| H | 20.740787 | 3.258995 | 44.043826 | H | 30.101052 | 7.730601 | 36.994583 |
| H | 23.123593 | 2.712614 | 44.297822 | H | 29.032614 | 7.579060 | 42.125034 |
| H | 24.701884 | 3.184089 | 42.495451 | H | 41.827241 | 7.866008 | 42.842799 |
| H | 20.376729 | 5.193905 | 39.606655 | H | 40.377640 | 6.505138 | 41.433547 |
| H | 21.963721 | 5.557967 | 37.806257 | H | 29.400652 | 3.104835 | 40.370892 |
| H | 18.243071 | 2.403565 | 37.944721 | H | 43.500939 | 2.550824 | 38.313148 |
| H | 18.273115 | 1.924926 | 35.533691 | H | 33.938405 | 7.118209 | 45.618287 |
| H | 17.034134 | 3.333477 | 33.978287 | H | 35.459722 | 7.082708 | 32.774397 |
| H | 15.260673 | 6.204407 | 38.414027 | H | 33.510081 | 6.466382 | 34.104543 |
| H | 14.023065 | 7.567772 | 36.836329 | H | 30.451662 | 3.886561 | 44.829023 |
| H | 13.169082 | 7.511375 | 42.645753 | H | 28.695855 | 2.863678 | 46.200037 |
| H | 26.573808 | 8.099136 | 42.050013 | H | 28.294298 | 3.943228 | 32.781689 |
| H | 24.983411 | 6.445135 | 41.220286 | H | 29.683905 | 7.263386 | 33.608010 |
| H | 13.612312 | 3.634913 | 39.867501 | H | 39.361347 | 6.823550 | 37.409264 |
| H | 27.797491 | 1.472661 | 39.434386 | H | 39.967367 | 2.900659 | 38.140560 |

|   |           |          |           |   |           |          |           |
|---|-----------|----------|-----------|---|-----------|----------|-----------|
| H | 52.223659 | 3.708589 | 43.947188 | H | 12.769779 | 7.627965 | 52.357891 |
| H | 54.659291 | 3.327772 | 44.019755 | H | 11.840825 | 7.508342 | 58.212794 |
| H | 56.055389 | 3.866474 | 42.061150 | H | 24.921466 | 7.824433 | 58.039412 |
| H | 51.374754 | 5.453614 | 39.579386 | H | 23.438429 | 6.353670 | 56.787234 |
| H | 52.752234 | 5.975909 | 37.680170 | H | 12.285112 | 3.636385 | 55.426345 |
| H | 49.643267 | 2.728867 | 37.994675 | H | 26.457138 | 1.986174 | 54.150399 |
| H | 49.739921 | 2.252193 | 35.586357 | H | 17.168906 | 6.737997 | 61.410732 |
| H | 48.463209 | 3.597568 | 34.007292 | H | 18.331492 | 7.537449 | 48.183441 |
| H | 46.477337 | 6.385546 | 38.406341 | H | 16.447492 | 6.747105 | 49.518853 |
| H | 45.196066 | 7.679149 | 36.803956 | H | 13.126110 | 4.378524 | 60.400409 |
| H | 44.251201 | 7.466392 | 42.893679 | H | 11.277481 | 3.575083 | 61.719142 |
| H | 44.981577 | 3.865299 | 39.723772 | H | 11.559380 | 3.614509 | 48.238729 |
| H | 49.690344 | 7.157533 | 45.885563 | H | 12.838329 | 7.245177 | 48.832261 |
| H | 50.783026 | 7.841467 | 32.624925 | H | 22.461161 | 5.934835 | 52.474849 |
| H | 48.924728 | 6.993692 | 33.963106 | H | 22.936458 | 2.372470 | 53.954966 |
| H | 45.686159 | 4.611794 | 44.843825 | H | 35.157151 | 3.015170 | 59.428376 |
| H | 43.802818 | 3.848805 | 46.152581 | H | 37.550746 | 2.453401 | 59.477795 |
| H | 44.205103 | 3.599262 | 32.714150 | H | 39.003014 | 3.061484 | 57.612802 |
| H | 45.295631 | 7.282319 | 33.280419 | H | 34.478292 | 5.164746 | 55.129939 |
| H | 54.726284 | 5.972277 | 36.665952 | H | 35.940855 | 5.714721 | 53.284347 |
| H | 9.463326  | 8.126925 | 58.063079 | H | 32.747474 | 2.304293 | 53.677078 |
| H | 7.916930  | 6.786682 | 56.693519 | H | 32.963368 | 1.768542 | 51.288911 |
| H | 10.728371 | 2.325613 | 54.106485 | H | 31.727605 | 3.042125 | 49.617739 |
| H | 7.191878  | 3.171162 | 53.802785 | H | 29.541437 | 5.943093 | 53.848160 |
| H | 19.485322 | 2.921677 | 59.356012 | H | 28.305818 | 7.166206 | 52.149609 |
| H | 21.875408 | 2.342374 | 59.404809 | H | 27.326252 | 7.346783 | 58.177540 |
| H | 23.352436 | 3.026916 | 57.584807 | H | 40.472828 | 7.764466 | 58.091076 |
| H | 18.862217 | 5.248283 | 55.142576 | H | 39.024798 | 6.293788 | 56.803039 |
| H | 20.344220 | 5.862369 | 53.334346 | H | 27.964816 | 3.406298 | 55.412289 |
| H | 16.929583 | 2.425935 | 53.511549 | H | 42.127295 | 2.010909 | 54.123884 |
| H | 17.002553 | 1.963521 | 51.099040 | H | 32.790506 | 6.733697 | 61.409811 |
| H | 15.799214 | 3.387231 | 49.530136 | H | 33.748324 | 7.686864 | 48.058519 |
| H | 13.977157 | 6.252437 | 53.950483 | H | 32.042158 | 6.622064 | 49.452028 |

|   |           |          |           |   |           |           |           |
|---|-----------|----------|-----------|---|-----------|-----------|-----------|
| H | 28.747611 | 4.377328 | 60.399438 | H | 46.387781 | 6.357228  | 65.153511 |
| H | 26.897523 | 3.574948 | 61.718299 | H | 41.501542 | 3.424815  | 63.794355 |
| H | 27.792573 | 2.668780 | 48.224303 | H | 54.922551 | 4.682738  | 55.325804 |
| H | 28.504546 | 6.603932 | 48.645816 | H | 56.250092 | 4.683133  | 39.763726 |
| H | 38.051541 | 5.774102 | 52.407223 | H | 57.578895 | 4.683415  | 24.200667 |
| H | 38.601911 | 2.335083 | 53.922991 | H | 32.654287 | 5.043314  | 18.026532 |
| H | 50.894931 | 3.699488 | 59.506195 | H | 17.034856 | 5.043564  | 18.026691 |
| H | 53.331549 | 3.325385 | 59.581253 | H | 10.176558 | 4.915348  | 24.089714 |
| H | 54.727843 | 3.865682 | 57.623112 | H | 8.848023  | 4.915668  | 39.653261 |
| H | 50.047612 | 5.459318 | 55.145312 | H | 7.520564  | 4.915582  | 55.216424 |
| H | 51.424855 | 5.976969 | 53.243037 | H | 12.998965 | 5.198990  | 65.269028 |
| H | 48.363559 | 2.709146 | 53.473361 | H | 28.618816 | 5.198914  | 65.268172 |
| H | 48.437544 | 2.258508 | 51.059758 | H | 44.238667 | 5.198818  | 65.267044 |
| H | 47.100342 | 3.581747 | 49.513906 | H | 48.274023 | 5.043172  | 18.026058 |
| H | 45.119338 | 6.287604 | 53.966205 | C | 32.495388 | 8.998154  | 40.585397 |
| H | 43.795251 | 7.574423 | 52.394259 | C | 33.073503 | 9.090201  | 41.943010 |
| H | 42.884712 | 7.336803 | 58.221629 | C | 34.126716 | 10.122363 | 42.274229 |
| H | 43.607790 | 3.450028 | 55.394616 | C | 34.841035 | 10.642179 | 41.016398 |
| H | 48.405876 | 6.743969 | 61.407856 | C | 33.821406 | 11.090588 | 39.959082 |
| H | 49.476096 | 7.711086 | 48.270918 | C | 32.930609 | 9.931769  | 39.470687 |
| H | 47.570774 | 6.902219 | 49.561937 | O | 33.513346 | 8.064711  | 41.028528 |
| H | 44.381990 | 4.363785 | 60.399418 | C | 26.536710 | 7.462566  | 37.394739 |
| H | 42.519464 | 3.571459 | 61.717696 | C | 25.397297 | 7.976156  | 38.054306 |
| H | 42.778588 | 3.661366 | 48.188440 | C | 24.283679 | 8.404172  | 37.328816 |
| H | 43.855602 | 7.218917 | 48.866892 | C | 24.270040 | 8.340794  | 35.928875 |
| H | 53.398488 | 5.970490 | 52.227719 | C | 25.407037 | 7.853234  | 35.268485 |
| H | 17.068426 | 7.157672 | 63.836082 | C | 26.526793 | 7.422719  | 35.981567 |
| H | 15.148105 | 6.357185 | 65.155574 | N | 27.647327 | 7.048368  | 38.110182 |
| H | 10.263336 | 3.421656 | 63.796943 | H | 34.847981 | 9.676437  | 42.984250 |
| H | 32.688942 | 7.156688 | 63.835381 | H | 32.496622 | 8.685609  | 42.784780 |
| H | 30.768128 | 6.356915 | 65.154746 | H | 31.517840 | 8.510962  | 40.480931 |
| H | 25.882227 | 3.423710 | 63.795652 | H | 35.483077 | 9.842506  | 40.603439 |
| H | 48.307604 | 7.158945 | 63.833798 | H | 35.504978 | 11.481378 | 41.289221 |



|    |           |          |           |    |           |          |           |
|----|-----------|----------|-----------|----|-----------|----------|-----------|
| C  | 17.902370 | 5.826273 | 30.224022 | C  | 32.583750 | 5.274004 | 19.075773 |
| C  | 18.892569 | 6.587171 | 30.871638 | O  | 31.143744 | 7.185017 | 18.538837 |
| C  | 16.745276 | 5.423000 | 30.947202 | O  | 34.105851 | 5.497461 | 24.167792 |
| C  | 15.671531 | 4.756372 | 30.318989 | O  | 33.615579 | 3.334160 | 24.570263 |
| C  | 14.559860 | 4.358949 | 31.055635 | C  | 33.845644 | 4.306556 | 23.763183 |
| O  | 18.430560 | 6.404675 | 27.972737 | C  | 29.839610 | 5.607441 | 25.916224 |
| O  | 17.894337 | 4.260715 | 28.429047 | C  | 29.287232 | 6.727756 | 26.562951 |
| C  | 18.093432 | 5.475723 | 28.791482 | C  | 43.550242 | 6.896517 | 26.586851 |
| Cu | 34.092647 | 5.990649 | 26.097465 | C  | 42.720561 | 6.039203 | 25.875160 |
| Cu | 33.543828 | 3.581623 | 26.545989 | C  | 43.239125 | 4.923050 | 25.186704 |
| C  | 37.800769 | 3.886617 | 26.434454 | C  | 44.638099 | 4.671106 | 25.236980 |
| C  | 38.324005 | 3.139241 | 27.505570 | C  | 29.525761 | 3.704696 | 24.368959 |
| C  | 39.673266 | 2.814058 | 27.558125 | C  | 44.316854 | 2.758342 | 23.777356 |
| C  | 40.524450 | 3.218971 | 26.535966 | C  | 42.949514 | 2.979503 | 23.737964 |
| C  | 40.040538 | 3.943375 | 25.430141 | C  | 42.385156 | 4.066562 | 24.442699 |
| C  | 38.659096 | 4.271286 | 25.366941 | O  | 42.186958 | 2.077607 | 22.998893 |
| C  | 38.167910 | 4.939387 | 24.225939 | O  | 32.126760 | 6.286125 | 25.981713 |
| C  | 39.030744 | 5.303324 | 23.196481 | O  | 31.641720 | 4.119822 | 26.379715 |
| C  | 40.392212 | 5.018403 | 23.273567 | C  | 31.288097 | 5.321748 | 26.101938 |
| C  | 40.909512 | 4.330399 | 24.379972 | C  | 33.562592 | 5.590884 | 30.325332 |
| O  | 41.241806 | 5.388780 | 22.236988 | C  | 34.586711 | 6.319267 | 30.958144 |
| O  | 36.000554 | 5.441761 | 26.228954 | C  | 32.420459 | 5.197702 | 31.080474 |
| O  | 35.506881 | 3.281226 | 26.651826 | C  | 31.326147 | 4.541208 | 30.480333 |
| C  | 36.350845 | 4.224940 | 26.443287 | C  | 30.218665 | 4.178931 | 31.242170 |
| C  | 33.846855 | 4.021974 | 22.293721 | O  | 34.009063 | 6.242304 | 28.073035 |
| C  | 34.612832 | 2.940971 | 21.873686 | O  | 33.496891 | 4.082052 | 28.472098 |
| C  | 34.701783 | 2.637980 | 20.519681 | C  | 33.700571 | 5.285260 | 28.871505 |
| C  | 34.024755 | 3.416991 | 19.587710 | Cu | 49.695799 | 6.207192 | 25.981236 |
| C  | 33.259777 | 4.496993 | 20.007743 | Cu | 49.343771 | 3.790198 | 26.564282 |
| C  | 33.170827 | 4.799985 | 21.361749 | C  | 53.571004 | 4.464799 | 26.367945 |
| C  | 32.403849 | 5.880988 | 21.783783 | C  | 54.157059 | 3.947781 | 27.515908 |
| C  | 31.727822 | 6.658998 | 20.849812 | C  | 55.530060 | 3.732767 | 27.559832 |
| C  | 31.817772 | 6.355006 | 19.496807 | C  | 56.316003 | 4.036770 | 26.454793 |



|   |           |          |           |    |           |          |           |
|---|-----------|----------|-----------|----|-----------|----------|-----------|
| C | 55.729947 | 4.554788 | 25.305829 | C  | 47.063426 | 4.772094 | 30.384021 |
| C | 54.356948 | 4.768802 | 25.262905 | C  | 45.993269 | 4.322211 | 31.151167 |
| C | 53.770890 | 5.287820 | 24.113942 | O  | 49.608499 | 6.569443 | 27.935218 |
| C | 54.557834 | 5.591822 | 23.007903 | O  | 49.296623 | 4.395918 | 28.455219 |
| C | 55.929834 | 5.377808 | 23.052827 | C  | 49.388611 | 5.633153 | 28.784857 |
| C | 56.515890 | 4.858790 | 24.200790 | C  | 11.158284 | 7.260965 | 41.959133 |
| O | 56.643771 | 5.617813 | 21.841791 | C  | 10.287267 | 6.502972 | 41.186144 |
| O | 51.637666 | 5.838004 | 26.120848 | C  | 10.757252 | 5.394972 | 40.491132 |
| O | 51.334217 | 3.662018 | 26.636232 | C  | 12.099252 | 5.042967 | 40.571107 |
| C | 52.092878 | 4.667277 | 26.380356 | C  | 11.698220 | 3.178974 | 39.103108 |
| C | 49.466780 | 4.021882 | 22.293161 | C  | 10.356220 | 3.528979 | 39.024133 |
| C | 50.232747 | 2.940878 | 21.873109 | C  | 9.886236  | 4.637978 | 39.718145 |
| C | 50.321671 | 2.637891 | 20.519101 | O  | 9.453203  | 2.792985 | 38.218146 |
| C | 49.644629 | 3.416907 | 19.587145 | Cu | 17.233227 | 6.153773 | 41.467008 |
| C | 48.879663 | 4.496911 | 20.007197 | Cu | 16.692454 | 3.752846 | 41.967564 |
| C | 48.790739 | 4.799899 | 21.361205 | C  | 20.956442 | 4.082688 | 41.826777 |
| C | 48.023773 | 5.880903 | 21.783256 | C  | 21.479139 | 3.326365 | 42.891567 |
| C | 47.347732 | 6.658919 | 20.849300 | C  | 22.832916 | 3.022636 | 42.956275 |
| C | 47.437657 | 6.354932 | 19.496292 | C  | 23.691344 | 3.460074 | 41.953749 |
| C | 48.203622 | 5.273928 | 19.075240 | C  | 23.211890 | 4.197236 | 40.855392 |
| O | 46.763615 | 7.184949 | 18.538336 | C  | 21.824513 | 4.500264 | 40.777485 |
| O | 49.731177 | 5.591623 | 24.088738 | C  | 21.338654 | 5.175889 | 39.638824 |
| O | 49.385047 | 3.426471 | 24.608753 | C  | 22.211459 | 5.571636 | 38.629321 |
| C | 49.525263 | 4.368911 | 23.749482 | C  | 23.576020 | 5.311713 | 38.723422 |
| C | 45.477986 | 5.539920 | 25.986889 | C  | 24.086735 | 4.620342 | 39.827123 |
| C | 44.914969 | 6.653317 | 26.637707 | O  | 24.431516 | 5.707180 | 37.703131 |
| C | 45.161998 | 3.587690 | 24.505146 | O  | 19.143017 | 5.618917 | 41.598675 |
| O | 47.715746 | 6.340174 | 25.884840 | O  | 18.662258 | 3.464131 | 42.061689 |
| O | 47.393500 | 4.172745 | 26.419200 | C  | 19.501402 | 4.408603 | 41.832009 |
| C | 46.948527 | 5.334330 | 26.098059 | C  | 16.881373 | 4.138485 | 37.721846 |
| C | 49.205887 | 5.999688 | 30.215127 | C  | 17.590406 | 3.037593 | 37.209164 |
| C | 50.152531 | 6.843460 | 30.823939 | C  | 17.596856 | 2.766983 | 35.847802 |
| C | 48.095327 | 5.533586 | 30.972689 | C  | 16.894700 | 3.590074 | 34.974398 |

|   |           |          |           |    |           |          |           |
|---|-----------|----------|-----------|----|-----------|----------|-----------|
| C | 16.146393 | 4.688898 | 35.446328 | C  | 15.518690 | 5.300947 | 33.071218 |
| C | 16.118582 | 4.952857 | 36.841259 | O  | 13.372288 | 4.201736 | 33.148497 |
| C | 15.305862 | 5.999362 | 37.321581 | O  | 17.159077 | 6.450612 | 43.433280 |
| C | 14.583655 | 6.790299 | 36.437014 | O  | 16.662326 | 4.295639 | 43.878536 |
| C | 14.638898 | 6.573817 | 35.070271 | C  | 16.857346 | 5.508522 | 44.251243 |
| C | 15.427398 | 5.522677 | 34.549798 | Cu | 32.877006 | 6.271477 | 41.544295 |
| O | 13.914384 | 7.449862 | 34.264923 | Cu | 32.328509 | 3.795989 | 42.176555 |
| O | 17.230061 | 5.617103 | 39.555681 | C  | 36.508839 | 4.025418 | 41.807666 |
| O | 16.748144 | 3.458575 | 40.001439 | C  | 37.005148 | 3.153203 | 42.759528 |
| C | 16.959652 | 4.420150 | 39.178845 | C  | 38.382076 | 2.842252 | 42.786032 |
| C | 12.972269 | 5.800962 | 41.346096 | C  | 39.239267 | 3.382728 | 41.851907 |
| C | 12.500284 | 6.908961 | 42.040108 | C  | 38.771970 | 4.260028 | 40.819615 |
| C | 26.684703 | 7.068780 | 42.312800 | C  | 37.366462 | 4.583437 | 40.801838 |
| C | 25.867311 | 6.289998 | 41.519724 | C  | 36.877195 | 5.416121 | 39.754541 |
| C | 26.375924 | 5.197403 | 40.743358 | C  | 37.724546 | 5.914991 | 38.794272 |
| C | 27.789697 | 4.934142 | 40.826095 | C  | 39.116373 | 5.632113 | 38.825025 |
| C | 12.571236 | 3.934968 | 39.877095 | C  | 39.644049 | 4.810678 | 39.819541 |
| C | 27.535353 | 3.120249 | 39.228622 | O  | 39.935673 | 6.163053 | 37.875161 |
| C | 26.135930 | 3.357776 | 39.151605 | O  | 34.730945 | 5.581181 | 41.711192 |
| C | 25.547315 | 4.375115 | 39.899075 | O  | 34.252110 | 3.419356 | 42.122474 |
| O | 25.493174 | 2.494899 | 38.310545 | C  | 35.052694 | 4.370789 | 41.879494 |
| O | 15.269303 | 6.440165 | 41.352733 | C  | 32.362768 | 3.944899 | 37.961583 |
| O | 14.778880 | 4.286799 | 41.805610 | C  | 32.993927 | 2.789651 | 37.536565 |
| C | 14.425597 | 5.484537 | 41.503173 | C  | 33.057005 | 2.493322 | 36.158021 |
| C | 16.713339 | 5.841952 | 45.695726 | C  | 32.478365 | 3.337524 | 35.233069 |
| C | 17.716091 | 6.613494 | 46.311421 | C  | 31.774871 | 4.523550 | 35.623284 |
| C | 18.781294 | 6.903260 | 32.219211 | C  | 31.710875 | 4.818433 | 37.031553 |
| C | 17.677278 | 6.468490 | 32.944089 | C  | 30.956868 | 5.950691 | 37.456151 |
| C | 16.648213 | 5.728109 | 32.330339 | C  | 30.332784 | 6.762889 | 36.545081 |
| C | 15.588274 | 5.421783 | 46.460003 | C  | 30.427512 | 6.507561 | 35.150062 |
| C | 14.507510 | 4.731289 | 45.871756 | C  | 31.136220 | 5.405061 | 34.680209 |
| C | 13.423973 | 4.326510 | 46.645414 | O  | 29.773551 | 7.434760 | 34.389123 |
| C | 14.486984 | 4.608090 | 32.423645 | O  | 32.786371 | 5.463215 | 39.711706 |

|    |           |          |           |   |           |          |           |
|----|-----------|----------|-----------|---|-----------|----------|-----------|
| O  | 32.181907 | 3.364162 | 40.249501 | C | 52.828352 | 3.947593 | 43.079296 |
| C  | 32.439331 | 4.282896 | 39.417555 | C | 54.201352 | 3.732573 | 43.123194 |
| C  | 28.606481 | 5.762574 | 41.659896 | C | 54.987277 | 4.036578 | 42.018142 |
| C  | 28.071785 | 6.815165 | 42.380817 | C | 54.401202 | 4.554601 | 40.869191 |
| C  | 42.295338 | 7.232732 | 42.158099 | C | 53.028202 | 4.768621 | 40.826292 |
| C  | 41.455411 | 6.431102 | 41.394256 | C | 52.442128 | 5.287645 | 39.677341 |
| C  | 41.961975 | 5.356829 | 40.636652 | C | 53.229054 | 5.591649 | 38.571289 |
| C  | 43.357033 | 5.082229 | 40.675489 | C | 54.601054 | 5.377629 | 38.616189 |
| C  | 28.337618 | 3.876784 | 40.042661 | C | 55.187129 | 4.858606 | 39.764139 |
| C  | 43.010303 | 3.266754 | 39.102314 | O | 55.314970 | 5.617636 | 37.405141 |
| C  | 41.646369 | 3.507404 | 39.077730 | O | 50.372346 | 5.931496 | 41.729053 |
| C  | 41.103359 | 4.559748 | 39.841038 | O | 49.973772 | 3.756067 | 42.179328 |
| O  | 40.867915 | 2.659827 | 38.294305 | C | 50.775296 | 4.733627 | 41.957451 |
| O  | 30.858488 | 6.455145 | 41.474355 | C | 48.267112 | 4.395457 | 37.817907 |
| O  | 30.433832 | 4.354644 | 42.157278 | C | 49.053336 | 3.334803 | 37.333146 |
| C  | 30.074735 | 5.502746 | 41.771729 | C | 49.116547 | 3.057492 | 35.974789 |
| C  | 32.271806 | 6.061535 | 45.738948 | C | 48.390780 | 3.829972 | 35.075307 |
| C  | 33.137160 | 6.975461 | 46.312386 | C | 47.567722 | 4.887125 | 35.516346 |
| C  | 34.519867 | 6.619763 | 32.312833 | C | 47.492397 | 5.165566 | 36.907805 |
| C  | 33.420848 | 6.212890 | 33.061147 | C | 46.620676 | 6.178550 | 37.354430 |
| C  | 32.357618 | 5.508346 | 32.467519 | C | 45.881213 | 6.920984 | 36.442228 |
| C  | 31.175973 | 5.513630 | 46.485168 | C | 45.970168 | 6.682381 | 35.080727 |
| C  | 30.198456 | 4.661512 | 45.894968 | C | 46.817877 | 5.662299 | 34.592629 |
| C  | 29.152107 | 4.168742 | 46.637008 | O | 45.215104 | 7.504653 | 34.247049 |
| C  | 30.167419 | 4.458325 | 32.605359 | O | 48.478212 | 5.883234 | 39.668865 |
| C  | 31.226114 | 5.128477 | 33.226609 | O | 48.096672 | 3.700364 | 40.090796 |
| O  | 29.050012 | 4.100124 | 33.348223 | C | 48.279974 | 4.676473 | 39.278313 |
| O  | 32.791346 | 6.588074 | 43.499862 | C | 44.206399 | 5.886210 | 41.485509 |
| O  | 32.437071 | 4.430516 | 44.035182 | C | 43.657071 | 6.967391 | 42.198787 |
| C  | 32.516892 | 5.661632 | 44.317502 | C | 43.867369 | 4.038374 | 39.879366 |
| Cu | 48.447210 | 6.400728 | 41.587728 | O | 46.473350 | 6.618941 | 41.476743 |
| Cu | 47.997322 | 3.974305 | 42.058475 | O | 46.067130 | 4.436530 | 41.875813 |
| C  | 52.242277 | 4.464616 | 41.931345 | C | 45.668292 | 5.629160 | 41.614239 |

|    |           |          |           |   |           |          |           |
|----|-----------|----------|-----------|---|-----------|----------|-----------|
| C  | 47.873827 | 6.039549 | 45.796995 | C | 22.648011 | 4.560487 | 55.320787 |
| C  | 48.830483 | 6.846395 | 46.440209 | O | 22.920674 | 5.665233 | 53.193123 |
| C  | 50.045136 | 7.184665 | 32.166122 | O | 17.795263 | 5.594825 | 57.299951 |
| C  | 48.986543 | 6.695206 | 32.923640 | O | 17.304484 | 3.423553 | 57.670945 |
| C  | 47.999897 | 5.871224 | 32.348980 | C | 18.146191 | 4.373736 | 57.482124 |
| C  | 46.741083 | 5.582069 | 46.526548 | C | 15.685801 | 4.212338 | 53.322240 |
| C  | 45.700309 | 4.858716 | 45.906063 | C | 16.411547 | 3.110296 | 52.835013 |
| C  | 44.612265 | 4.410933 | 46.648756 | C | 16.472484 | 2.841226 | 51.474902 |
| C  | 45.921705 | 4.611141 | 32.511595 | C | 15.802579 | 3.662343 | 50.575352 |
| C  | 46.912594 | 5.392934 | 33.121189 | C | 15.040824 | 4.763635 | 51.017514 |
| O  | 44.848380 | 4.152077 | 33.266731 | C | 14.970616 | 5.037011 | 52.410800 |
| O  | 48.350716 | 6.676059 | 43.552874 | C | 14.159341 | 6.098997 | 52.857129 |
| O  | 47.919477 | 4.501544 | 43.972977 | C | 13.475264 | 6.891699 | 51.943935 |
| C  | 48.065540 | 5.718106 | 44.357018 | C | 13.559533 | 6.655559 | 50.581696 |
| C  | 9.830844  | 7.260885 | 57.522289 | C | 14.344650 | 5.586731 | 50.093193 |
| C  | 8.959813  | 6.502896 | 56.749314 | O | 12.860063 | 7.525844 | 49.748152 |
| C  | 9.429780  | 5.394897 | 56.054290 | O | 15.947543 | 5.655507 | 55.205255 |
| C  | 10.771780 | 5.042887 | 56.134240 | O | 15.439599 | 3.489633 | 55.578772 |
| C  | 10.370715 | 3.178901 | 54.666241 | C | 15.689409 | 4.468873 | 54.787949 |
| C  | 9.028715  | 3.528910 | 54.587291 | C | 11.644813 | 5.800876 | 56.909215 |
| C  | 8.558747  | 4.637908 | 55.281315 | C | 11.172845 | 6.908875 | 57.603239 |
| O  | 8.125681  | 2.792922 | 53.781316 | C | 25.302285 | 7.076475 | 57.572712 |
| Cu | 15.893522 | 6.138058 | 57.133928 | C | 24.469259 | 6.248584 | 56.829423 |
| Cu | 15.341314 | 3.724220 | 57.551298 | C | 24.982350 | 5.147998 | 56.112073 |
| C  | 19.594812 | 4.040704 | 57.437285 | C | 26.377977 | 4.884851 | 56.161298 |
| C  | 20.148039 | 3.277351 | 58.481000 | C | 11.243748 | 3.934890 | 55.440215 |
| C  | 21.500998 | 2.962918 | 58.494399 | C | 26.054780 | 3.033073 | 54.624203 |
| C  | 22.324427 | 3.397221 | 57.461069 | C | 24.687559 | 3.252513 | 54.600473 |
| C  | 21.808260 | 4.139904 | 56.381729 | C | 24.125995 | 4.313429 | 55.346333 |
| C  | 20.423146 | 4.452274 | 56.356163 | O | 23.921976 | 2.371554 | 53.839484 |
| C  | 19.897815 | 5.133211 | 55.237280 | O | 13.938902 | 6.431865 | 56.972258 |
| C  | 20.732126 | 5.528436 | 54.196296 | O | 13.435043 | 4.270256 | 57.369081 |
| C  | 22.098401 | 5.262934 | 54.239532 | C | 13.091602 | 5.475124 | 57.084524 |

|    |           |          |           |   |           |          |           |
|----|-----------|----------|-----------|---|-----------|----------|-----------|
| C  | 15.283042 | 5.695809 | 61.352094 | C | 31.400451 | 3.702430 | 50.564590 |
| C  | 16.314083 | 6.385792 | 61.978046 | C | 30.578044 | 4.754431 | 51.014559 |
| C  | 17.647075 | 6.928780 | 47.662130 | C | 30.494544 | 5.015083 | 52.409695 |
| C  | 16.569914 | 6.488294 | 48.422781 | C | 29.632476 | 6.033593 | 52.861388 |
| C  | 15.528973 | 5.737395 | 47.844356 | C | 28.905436 | 6.791621 | 51.949830 |
| C  | 14.198077 | 5.242813 | 62.095147 | C | 29.000049 | 6.565285 | 50.586319 |
| C  | 13.166036 | 4.552830 | 61.469195 | C | 29.836783 | 5.541740 | 50.099592 |
| C  | 12.083071 | 4.099834 | 62.213248 | O | 28.259423 | 7.398822 | 49.752930 |
| C  | 13.382962 | 4.597647 | 48.010796 | O | 31.483855 | 5.671003 | 55.198647 |
| C  | 14.421817 | 5.313994 | 48.620743 | O | 31.044452 | 3.490738 | 55.575515 |
| O  | 12.291340 | 4.190839 | 48.769984 | C | 31.256731 | 4.477705 | 54.782966 |
| O  | 15.758676 | 6.378528 | 59.108011 | C | 27.216848 | 5.707545 | 56.962964 |
| O  | 15.278097 | 4.206406 | 59.477114 | C | 26.662674 | 6.810351 | 57.637923 |
| C  | 15.446345 | 5.410061 | 59.891979 | C | 40.912843 | 6.952096 | 57.633048 |
| Cu | 31.463158 | 6.145080 | 57.131261 | C | 40.085483 | 6.136843 | 56.872076 |
| Cu | 30.955679 | 3.721428 | 57.550802 | C | 40.602156 | 5.045978 | 56.142545 |
| C  | 35.200809 | 4.083022 | 57.439972 | C | 41.999324 | 4.783090 | 56.192446 |
| C  | 35.740992 | 3.344914 | 58.509065 | C | 26.900445 | 3.832375 | 55.383204 |
| C  | 37.087616 | 3.006710 | 58.535220 | C | 41.678523 | 2.944679 | 54.640424 |
| C  | 37.919108 | 3.390984 | 57.489395 | C | 40.311404 | 3.168255 | 54.609627 |
| C  | 37.418746 | 4.112385 | 56.388536 | C | 39.747142 | 4.224217 | 55.360880 |
| C  | 36.039255 | 4.451810 | 56.351760 | O | 39.548364 | 2.293484 | 53.839145 |
| C  | 35.529207 | 5.113823 | 55.215669 | O | 29.494756 | 6.411430 | 57.016989 |
| C  | 36.372868 | 5.461267 | 54.164882 | O | 29.043285 | 4.232296 | 57.383513 |
| C  | 37.733949 | 5.168753 | 54.217209 | C | 28.670470 | 5.433997 | 57.128590 |
| C  | 38.269627 | 4.486385 | 55.318641 | C | 30.903116 | 5.695628 | 61.351271 |
| O  | 38.565034 | 5.526460 | 53.161782 | C | 31.934171 | 6.385605 | 61.977208 |
| O  | 33.381410 | 5.621871 | 57.260097 | C | 32.987078 | 7.334596 | 47.669940 |
| O  | 32.919395 | 3.449761 | 57.661365 | C | 31.973345 | 6.790459 | 48.429662 |
| C  | 33.748705 | 4.407288 | 57.461563 | C | 31.026066 | 5.870034 | 47.874023 |
| C  | 31.252007 | 4.222674 | 53.316455 | C | 29.818163 | 5.242633 | 62.094342 |
| C  | 32.031594 | 3.161915 | 52.821544 | C | 28.786109 | 4.552656 | 61.468406 |
| C  | 32.109403 | 2.908817 | 51.459019 | C | 27.703155 | 4.099663 | 62.212477 |

|    |           |          |           |   |           |          |           |
|----|-----------|----------|-----------|---|-----------|----------|-----------|
| C  | 29.029012 | 4.466787 | 48.020757 | O | 47.121677 | 5.803492 | 55.214946 |
| C  | 29.949715 | 5.308562 | 48.641957 | O | 46.812532 | 3.595558 | 55.560909 |
| O  | 28.005190 | 3.929728 | 48.740385 | C | 46.965272 | 4.604087 | 54.783449 |
| O  | 31.365109 | 6.379866 | 59.106653 | C | 42.836563 | 5.605491 | 56.996288 |
| O  | 30.899374 | 4.204609 | 59.477424 | C | 42.273420 | 6.691242 | 57.693016 |
| C  | 31.063481 | 5.409435 | 59.891576 | C | 42.523316 | 3.736933 | 55.408608 |
| Cu | 47.050949 | 6.251411 | 57.151020 | O | 45.076836 | 6.400710 | 57.023780 |
| Cu | 46.686624 | 3.795035 | 57.532606 | O | 44.741066 | 4.194589 | 57.349994 |
| C  | 50.914826 | 4.464382 | 57.493755 | C | 44.304085 | 5.381792 | 57.123593 |
| C  | 51.500920 | 3.947352 | 58.641694 | C | 46.523192 | 5.695393 | 61.350166 |
| C  | 52.873920 | 3.732327 | 58.685568 | C | 47.554258 | 6.385364 | 61.976087 |
| C  | 53.659827 | 4.036331 | 57.580503 | C | 48.707509 | 7.164403 | 47.786125 |
| C  | 53.073733 | 4.554362 | 56.431564 | C | 47.625050 | 6.685352 | 48.514832 |
| C  | 51.700733 | 4.768387 | 56.388690 | C | 46.632288 | 5.891514 | 47.908393 |
| C  | 51.114640 | 5.287417 | 55.239751 | C | 45.438249 | 5.242399 | 62.093255 |
| C  | 51.901547 | 5.591423 | 54.133687 | C | 44.406182 | 4.552428 | 61.467335 |
| C  | 53.273547 | 5.377397 | 54.178561 | C | 43.323240 | 4.099435 | 62.211424 |
| C  | 53.859639 | 4.858367 | 55.326499 | C | 44.530519 | 4.665272 | 48.015334 |
| O  | 53.987443 | 5.617405 | 52.967501 | C | 45.527299 | 5.414250 | 48.655896 |
| O  | 48.991626 | 5.859520 | 57.301076 | O | 43.440637 | 4.206394 | 48.746205 |
| O  | 48.672403 | 3.655289 | 57.668243 | O | 46.921201 | 6.443775 | 59.124218 |
| C  | 49.437938 | 4.672495 | 57.497826 | O | 46.573317 | 4.239329 | 59.461351 |
| C  | 46.962167 | 4.367421 | 53.316260 | C | 46.675285 | 5.443905 | 59.890997 |
| C  | 47.784155 | 3.348705 | 52.801711 | C | 16.262158 | 6.620778 | 63.347051 |
| C  | 47.836245 | 3.095645 | 51.438582 | C | 15.179191 | 6.168782 | 64.090104 |
| C  | 47.065794 | 3.852702 | 50.563962 | C | 14.147152 | 5.478800 | 63.465152 |
| C  | 46.213412 | 4.873776 | 51.034533 | C | 12.031146 | 4.336820 | 63.582253 |
| C  | 46.146756 | 5.124103 | 52.431464 | C | 13.063187 | 5.025805 | 64.207205 |
| C  | 45.242785 | 6.093984 | 52.908388 | O | 10.943183 | 3.908824 | 64.361306 |
| C  | 44.465640 | 6.826216 | 52.019784 | C | 31.882271 | 6.620587 | 63.346214 |
| C  | 44.548626 | 6.619895 | 50.652693 | C | 30.799317 | 6.168593 | 64.089284 |
| C  | 45.426920 | 5.640852 | 50.134486 | C | 29.767262 | 5.478616 | 63.464348 |
| O  | 43.762003 | 7.438211 | 49.844789 | C | 27.651255 | 4.336645 | 63.581483 |

|   |           |          |           |   |           |          |           |
|---|-----------|----------|-----------|---|-----------|----------|-----------|
| C | 28.683309 | 5.025622 | 64.206418 | H | 37.673627 | 2.816627 | 28.310846 |
| O | 26.563304 | 3.908650 | 64.360554 | H | 40.062868 | 2.245237 | 28.396619 |
| C | 47.502385 | 6.620342 | 63.345096 | H | 41.569263 | 2.948780 | 26.609008 |
| C | 46.419443 | 6.168348 | 64.088184 | H | 37.116516 | 5.179393 | 24.106292 |
| C | 45.387375 | 5.478376 | 63.463264 | H | 38.630801 | 5.817257 | 22.332949 |
| C | 43.271365 | 4.336411 | 63.580432 | H | 35.146057 | 2.325296 | 22.590354 |
| C | 44.303433 | 5.025383 | 64.205353 | H | 35.297750 | 1.792954 | 20.190412 |
| O | 42.183428 | 3.908416 | 64.359522 | H | 34.099811 | 3.170464 | 18.536523 |
| H | 12.119252 | 8.127130 | 26.935675 | H | 32.268041 | 6.144861 | 22.826147 |
| H | 10.573040 | 6.786856 | 25.566344 | H | 31.125420 | 7.500027 | 21.164952 |
| H | 13.383653 | 2.323356 | 22.982287 | H | 29.921161 | 7.385893 | 27.146227 |
| H | 9.847463  | 3.169689 | 22.676888 | H | 43.132118 | 7.757266 | 27.099189 |
| H | 22.115758 | 2.849669 | 28.239806 | H | 41.664396 | 6.266815 | 25.854053 |
| H | 24.509734 | 2.285991 | 28.275294 | H | 30.587199 | 3.489089 | 24.326096 |
| H | 25.983300 | 3.028167 | 26.475199 | H | 44.726102 | 1.924850 | 23.222442 |
| H | 21.469843 | 5.218677 | 24.049341 | H | 35.450271 | 6.646252 | 30.389626 |
| H | 22.950498 | 5.901115 | 22.267853 | H | 31.302177 | 4.310915 | 29.419901 |
| H | 19.532045 | 2.329470 | 22.589906 | H | 29.391704 | 3.675915 | 30.758846 |
| H | 19.679275 | 1.794029 | 20.190518 | H | 31.291830 | 6.860993 | 17.596343 |
| H | 18.480501 | 3.170816 | 18.536733 | H | 40.762674 | 5.904799 | 21.514328 |
| H | 16.651615 | 6.145317 | 22.827160 | H | 41.205536 | 2.298087 | 23.000642 |
| H | 15.506929 | 7.501071 | 21.165073 | H | 53.552008 | 3.700205 | 28.381286 |
| H | 14.495589 | 7.508309 | 27.087432 | H | 55.987726 | 3.326163 | 28.455758 |
| H | 27.515289 | 7.862421 | 26.994014 | H | 57.384066 | 3.866347 | 26.497870 |
| H | 26.042647 | 6.398234 | 25.719261 | H | 52.703445 | 5.451806 | 24.014163 |
| H | 14.941533 | 3.634107 | 24.311235 | H | 54.081113 | 5.975912 | 22.116748 |
| H | 29.090929 | 2.068976 | 23.052172 | H | 50.777523 | 2.335080 | 22.589463 |
| H | 19.763877 | 6.924659 | 30.321697 | H | 50.920925 | 1.795285 | 20.189770 |
| H | 15.665825 | 4.545433 | 29.254917 | H | 49.720406 | 3.170967 | 18.535936 |
| H | 13.751364 | 3.846382 | 30.552288 | H | 47.862680 | 6.134553 | 22.823785 |
| H | 15.671674 | 6.861055 | 17.596390 | H | 46.741113 | 7.496804 | 21.164804 |
| H | 25.072117 | 6.039549 | 21.428785 | H | 45.548201 | 7.335223 | 27.194038 |
| H | 25.569131 | 2.436723 | 22.852341 | H | 46.223685 | 3.370648 | 24.471905 |

|                                |                                |
|--------------------------------|--------------------------------|
| H 50.986667 7.227528 30.247695 | H 36.322089 2.724205 43.496902 |
| H 47.059019 4.524954 29.327744 | H 38.770192 2.168194 43.556121 |
| H 45.215560 3.738462 30.677634 | H 40.301145 3.122301 41.902444 |
| H 46.913257 6.862043 17.595758 | H 35.815259 5.659203 39.708469 |
| H 56.056327 5.977255 21.104073 | H 37.325746 6.552044 37.995920 |
| H 10.790981 8.128149 42.498341 | H 33.460673 2.130938 38.273553 |
| H 9.244457 6.787099 41.129974  | H 33.575882 1.590562 35.820475 |
| H 12.055348 2.324934 38.544144 | H 32.556971 3.074179 34.173320 |
| H 8.519431 3.171288 38.239461  | H 30.868106 6.171426 38.520550 |
| H 20.824940 2.982152 43.684910 | H 29.741180 7.625228 36.864251 |
| H 23.221208 2.446637 43.790538 | H 28.714125 7.430530 43.016453 |
| H 24.740000 3.204296 42.037212 | H 41.886653 8.064721 42.723043 |
| H 20.284020 5.393650 39.503158 | H 40.400198 6.670157 41.387965 |
| H 21.814298 6.087405 37.765215 | H 29.406144 3.657844 40.089453 |
| H 18.151045 2.393411 37.876923 | H 43.408882 2.461889 38.498690 |
| H 18.153435 1.917272 35.465248 | H 33.941942 7.401899 45.708160 |
| H 16.925082 3.347667 33.921661 | H 35.324894 7.172622 32.786960 |
| H 15.203167 6.215007 38.379086 | H 33.401725 6.465777 34.113778 |
| H 13.966210 7.594830 36.813473 | H 30.269168 4.398529 44.838978 |
| H 13.169369 7.511894 42.644910 | H 28.403560 3.524527 46.160197 |
| H 26.259120 7.893094 42.893634 | H 28.380916 3.570436 32.808665 |
| H 24.799369 6.528749 41.490403 | H 29.794720 7.226189 33.442173 |
| H 13.611962 3.633921 39.868338 | H 39.418364 6.716264 37.267797 |
| H 27.948028 2.313952 38.616598 | H 39.884348 2.881811 38.323135 |
| H 18.564791 6.961444 45.733263 | H 52.223866 3.709908 43.947687 |
| H 19.557609 7.484164 32.707158 | H 54.659335 3.328160 44.019913 |
| H 17.625032 6.729698 33.992338 | H 56.055397 3.866628 42.061240 |
| H 14.474513 4.505768 44.811276 | H 51.374593 5.452743 39.579173 |
| H 12.609949 3.794498 46.172047 | H 52.752217 5.975698 37.680067 |
| H 12.716272 3.682429 32.584420 | H 49.630574 2.727573 38.021247 |
| H 13.971706 7.223666 33.286718 | H 49.733597 2.240058 35.615439 |
| H 23.960342 6.246110 36.991155 | H 48.464952 3.581744 34.026171 |
| H 24.547224 2.689065 38.223139 | H 46.485715 6.405117 38.406054 |



|                                |                                |
|--------------------------------|--------------------------------|
| H 45.217830 7.700186 36.792990 | H 13.128868 4.376102 60.400545 |
| H 44.296946 7.601468 42.802305 | H 11.277797 3.574471 61.719260 |
| H 44.926734 3.809013 39.834542 | H 11.625083 3.659394 48.229889 |
| H 49.681969 7.224702 45.885871 | H 12.954339 7.298489 48.772938 |
| H 50.788296 7.829746 32.624106 | H 22.420678 6.189233 52.490512 |
| H 48.934896 6.978704 33.966235 | H 22.941284 2.594318 53.847121 |
| H 45.701854 4.639893 44.843845 | H 35.104061 3.033423 59.329243 |
| H 43.828938 3.855165 46.151391 | H 37.489815 2.440487 59.369304 |
| H 44.218487 3.575579 32.729040 | H 38.961478 3.106919 57.539799 |
| H 45.308039 7.270134 33.273469 | H 34.477678 5.362515 55.117173 |
| H 54.726628 5.972702 36.665869 | H 35.958939 5.969375 53.304444 |
| H 9.463385 8.127045 58.062936  | H 32.594026 2.535832 53.505108 |
| H 7.916948 6.786702 56.693570  | H 32.724431 2.093085 51.092107 |
| H 10.728082 2.325373 54.106648 | H 31.487374 3.473234 49.510834 |
| H 7.191610 3.170328 53.803751  | H 29.497103 6.252034 53.915512 |
| H 19.518856 2.934581 59.294582 | H 28.247899 7.574732 52.304147 |
| H 21.915560 2.380527 59.311129 | H 27.296821 7.458264 58.232369 |
| H 23.373003 3.135230 57.503685 | H 40.495993 7.793018 58.178158 |
| H 18.841064 5.359078 55.142699 | H 39.032712 6.378313 56.845528 |
| H 20.306193 6.050712 53.350332 | H 27.961971 3.618317 55.334538 |
| H 16.941417 2.461464 53.523188 | H 42.088157 2.138894 54.046220 |
| H 17.042767 1.990955 51.114327 | H 32.787936 6.739527 61.409435 |
| H 15.871824 3.418405 49.524825 | H 33.685141 8.045625 48.122649 |
| H 14.029458 6.326831 53.909061 | H 31.889819 7.084762 49.480637 |
| H 12.859668 7.709232 52.294369 | H 28.748503 4.375636 60.399825 |
| H 11.840560 7.509203 58.212312 | H 26.897610 3.574741 61.718347 |
| H 24.888787 7.926288 58.106436 | H 27.470624 3.352502 48.171394 |
| H 23.415633 6.487487 56.805207 | H 28.374152 7.187963 48.772960 |
| H 12.285097 3.636323 55.426864 | H 38.076004 6.039006 52.443091 |
| H 26.463307 2.223041 54.034956 | H 38.568160 2.518211 53.843177 |
| H 17.168295 6.739366 61.410626 | H 50.894893 3.700082 59.506302 |
| H 18.434468 7.516348 48.123866 | H 53.331558 3.325525 59.581313 |
| H 16.549221 6.750979 49.471804 | H 54.727835 3.865729 57.623155 |

|   |           |          |           |   |           |           |           |
|---|-----------|----------|-----------|---|-----------|-----------|-----------|
| H | 50.047592 | 5.459327 | 55.145343 | H | 7.520572  | 4.915535  | 55.216424 |
| H | 51.424877 | 5.977005 | 53.243003 | H | 12.998923 | 5.198968  | 65.269007 |
| H | 48.392113 | 2.750733 | 53.471194 | H | 28.618738 | 5.198967  | 65.268132 |
| H | 48.476750 | 2.307159 | 51.056385 | H | 44.238590 | 5.198830  | 65.267015 |
| H | 47.129231 | 3.620291 | 49.510660 | H | 48.273983 | 5.043212  | 18.026066 |
| H | 45.111850 | 6.294622 | 53.965761 | C | 32.766115 | 8.585355  | 39.331889 |
| H | 43.777948 | 7.572942 | 52.393660 | C | 33.208144 | 9.556251  | 40.357249 |
| H | 42.904001 | 7.338519 | 58.292091 | C | 34.531855 | 10.289460 | 40.224328 |
| H | 43.584766 | 3.521984 | 55.363354 | C | 35.171633 | 10.136366 | 38.831097 |
| H | 48.405656 | 6.744618 | 61.407916 | C | 35.064134 | 8.700631  | 38.298110 |
| H | 49.455887 | 7.784867 | 48.268911 | C | 33.595926 | 8.292853  | 38.104910 |
| H | 47.560394 | 6.953118 | 49.560703 | O | 33.328983 | 8.132784  | 40.573390 |
| H | 44.381384 | 4.364380 | 60.399375 | C | 30.038289 | 9.879688  | 42.631535 |
| H | 42.519297 | 3.571656 | 61.717704 | C | 29.336103 | 11.054778 | 42.970930 |
| H | 42.806284 | 3.655721 | 48.186974 | C | 29.423620 | 11.588708 | 44.259618 |
| H | 43.848677 | 7.225828 | 48.865785 | C | 30.203426 | 10.967010 | 45.242120 |
| H | 53.398795 | 5.970941 | 52.227648 | C | 30.902290 | 9.799440  | 44.909789 |
| H | 17.068268 | 7.157984 | 63.836011 | C | 30.829088 | 9.260528  | 43.623803 |
| H | 15.148116 | 6.357234 | 65.155551 | N | 29.997241 | 9.353227  | 41.339983 |
| H | 10.263094 | 3.421732 | 63.797175 | H | 34.376880 | 11.357585 | 40.459469 |
| H | 32.688226 | 7.158026 | 63.835100 | H | 32.428280 | 10.009048 | 40.982105 |
| H | 30.768031 | 6.357177 | 65.154678 | H | 31.688678 | 8.391985  | 39.252076 |
| H | 25.881682 | 3.424335 | 63.795760 | H | 36.227570 | 10.458262 | 38.872854 |
| H | 48.307514 | 7.159119 | 63.833758 | H | 34.662318 | 10.816572 | 38.119744 |
| H | 46.387763 | 6.357312 | 65.153484 | H | 35.601702 | 8.607337  | 37.336899 |
| H | 41.501068 | 3.425260 | 63.794504 | H | 35.547191 | 8.006151  | 39.009031 |
| H | 54.922535 | 4.682790 | 55.325763 | H | 33.150215 | 8.846187  | 37.255553 |
| H | 56.250077 | 4.683175 | 39.763689 | H | 33.503499 | 7.217690  | 37.875002 |
| H | 57.578883 | 4.683451 | 24.200610 | H | 35.209226 | 9.890435  | 41.002440 |
| H | 32.654254 | 5.043359 | 18.026530 | H | 28.719965 | 11.551759 | 42.212776 |
| H | 17.034851 | 5.043671 | 18.026678 | H | 28.869674 | 12.503755 | 44.498043 |
| H | 10.176557 | 4.915284 | 24.089609 | H | 30.264276 | 11.384919 | 46.251803 |
| H | 8.848003  | 4.915575 | 39.653290 | H | 31.514074 | 9.287693  | 45.660542 |

|                                          |           |          |           |    |           |          |           |
|------------------------------------------|-----------|----------|-----------|----|-----------|----------|-----------|
| H                                        | 31.391731 | 8.355658 | 43.382301 | C  | 17.639888 | 4.497025 | 20.008011 |
| H                                        | 30.218434 | 8.356593 | 41.272644 | C  | 17.550913 | 4.800019 | 21.362013 |
| H                                        | 29.180401 | 9.608501 | 40.791008 | C  | 16.783924 | 5.881020 | 21.784030 |
|                                          |           |          |           | C  | 16.107910 | 6.659026 | 20.850045 |
|                                          |           |          |           | C  | 16.197885 | 6.355032 | 19.497042 |
| ( <i>R,R</i> )-2-RC (open-shell singlet) |           |          |           | C  | 16.963876 | 5.274031 | 19.076025 |
| C                                        | 12.487000 | 7.261000 | 26.395000 | O  | 15.523872 | 7.185038 | 18.539057 |
| C                                        | 11.616000 | 6.503000 | 25.622000 | O  | 18.564826 | 5.528450 | 24.111931 |
| C                                        | 12.086000 | 5.395000 | 24.927000 | O  | 18.020439 | 3.387577 | 24.573172 |
| C                                        | 13.428000 | 5.043000 | 25.007000 | C  | 18.263945 | 4.335758 | 23.745203 |
| C                                        | 13.027000 | 3.179000 | 23.539000 | C  | 14.301000 | 5.801000 | 25.782000 |
| C                                        | 11.685000 | 3.529000 | 23.460000 | C  | 13.829000 | 6.909000 | 26.476000 |
| C                                        | 11.215000 | 4.638000 | 24.154000 | C  | 27.939965 | 7.064609 | 26.445164 |
| O                                        | 10.782000 | 2.793000 | 22.654000 | C  | 27.106590 | 6.205754 | 25.736963 |
| Cu                                       | 18.544566 | 6.083742 | 26.015556 | C  | 27.621154 | 5.081391 | 25.059064 |
| Cu                                       | 17.949064 | 3.696088 | 26.527824 | C  | 29.017624 | 4.824774 | 25.114902 |
| C                                        | 22.213397 | 3.943415 | 26.372783 | C  | 13.900000 | 3.935000 | 24.313000 |
| C                                        | 22.757992 | 3.186169 | 27.425551 | C  | 28.698126 | 2.918068 | 23.645146 |
| C                                        | 24.111644 | 2.874477 | 27.453900 | C  | 27.330242 | 3.131362 | 23.617155 |
| C                                        | 24.945637 | 3.308478 | 26.428655 | C  | 26.766415 | 4.216580 | 24.325246 |
| C                                        | 24.438513 | 4.042117 | 25.339267 | O  | 26.567004 | 2.224728 | 22.884458 |
| C                                        | 23.051717 | 4.345767 | 25.294950 | O  | 16.597062 | 6.402542 | 25.851275 |
| C                                        | 22.535193 | 5.008997 | 24.161246 | O  | 16.054757 | 4.263354 | 26.319282 |
| C                                        | 23.379497 | 5.400902 | 23.127116 | C  | 15.735970 | 5.461599 | 25.984937 |
| C                                        | 24.747270 | 5.148268 | 23.190800 | C  | 17.910463 | 5.816822 | 30.229028 |
| C                                        | 25.288474 | 4.460558 | 24.285477 | C  | 18.902882 | 6.575867 | 30.875514 |
| O                                        | 25.579114 | 5.545574 | 22.149817 | C  | 16.756480 | 5.410482 | 30.955936 |
| O                                        | 20.435305 | 5.514917 | 26.186742 | C  | 15.680859 | 4.744451 | 30.330391 |
| O                                        | 19.911531 | 3.369255 | 26.648707 | C  | 14.571889 | 4.345186 | 31.070310 |
| C                                        | 20.768045 | 4.296764 | 26.413825 | O  | 18.433555 | 6.400239 | 27.976640 |
| C                                        | 18.226927 | 4.022014 | 22.293999 | O  | 17.897081 | 4.255826 | 28.429782 |
| C                                        | 18.992915 | 2.941012 | 21.873981 | C  | 18.097335 | 5.469877 | 28.794498 |
| C                                        | 19.081890 | 2.638017 | 20.519979 | Cu | 34.115147 | 6.055775 | 26.054497 |
| C                                        | 18.404876 | 3.417024 | 19.587993 |    |           |          |           |

|    |           |          |           |    |           |          |           |
|----|-----------|----------|-----------|----|-----------|----------|-----------|
| Cu | 33.556545 | 3.658606 | 26.554235 | C  | 43.246797 | 4.907924 | 25.178439 |
| C  | 37.812133 | 3.939132 | 26.433352 | C  | 44.645582 | 4.658165 | 25.235006 |
| C  | 38.329217 | 3.210002 | 27.519946 | C  | 29.542183 | 3.747515 | 24.372604 |
| C  | 39.674217 | 2.869094 | 27.576428 | C  | 44.330564 | 2.729810 | 23.794257 |
| C  | 40.527676 | 3.242494 | 26.544433 | C  | 42.962925 | 2.947729 | 23.750917 |
| C  | 40.049854 | 3.949862 | 25.424926 | C  | 42.396173 | 4.042885 | 24.440796 |
| C  | 38.671978 | 4.290355 | 25.355946 | O  | 42.202354 | 2.034445 | 23.023916 |
| C  | 38.185764 | 4.936996 | 24.200472 | O  | 32.146986 | 6.354778 | 25.936638 |
| C  | 39.051193 | 5.270153 | 23.162651 | O  | 31.656777 | 4.197892 | 26.376588 |
| C  | 40.410407 | 4.976707 | 23.246602 | C  | 31.305582 | 5.394588 | 26.075985 |
| C  | 40.921780 | 4.308247 | 24.367476 | C  | 33.611588 | 5.751216 | 30.286976 |
| O  | 41.263904 | 5.320732 | 22.204146 | C  | 34.667485 | 6.443625 | 30.907379 |
| O  | 36.021156 | 5.500884 | 26.193097 | C  | 32.453746 | 5.421451 | 31.045883 |
| O  | 35.516923 | 3.352994 | 26.665894 | C  | 31.331533 | 4.808172 | 30.452515 |
| C  | 36.365130 | 4.287290 | 26.435136 | C  | 30.207282 | 4.509779 | 31.216968 |
| C  | 33.846855 | 4.021974 | 22.293721 | O  | 34.041738 | 6.352069 | 28.021172 |
| C  | 34.612832 | 2.940971 | 21.873686 | O  | 33.514011 | 4.204498 | 28.468808 |
| C  | 34.701783 | 2.637980 | 20.519681 | C  | 33.733363 | 5.414019 | 28.840829 |
| C  | 34.024755 | 3.416991 | 19.587710 | Cu | 49.697168 | 6.205848 | 25.981152 |
| C  | 33.259777 | 4.496993 | 20.007743 | Cu | 49.346545 | 3.788002 | 26.562760 |
| C  | 33.170827 | 4.799985 | 21.361749 | C  | 53.571004 | 4.464799 | 26.367945 |
| C  | 32.403849 | 5.880988 | 21.783783 | C  | 54.157059 | 3.947781 | 27.515908 |
| C  | 31.727822 | 6.658998 | 20.849812 | C  | 55.530060 | 3.732767 | 27.559832 |
| C  | 31.817772 | 6.355006 | 19.496807 | C  | 56.316003 | 4.036770 | 26.454793 |
| C  | 32.583750 | 5.274004 | 19.075773 | C  | 55.729947 | 4.554788 | 25.305829 |
| O  | 31.143744 | 7.185017 | 18.538837 | C  | 54.356948 | 4.768802 | 25.262905 |
| O  | 34.123586 | 5.521645 | 24.139514 | C  | 53.770890 | 5.287820 | 24.113942 |
| O  | 33.626877 | 3.367683 | 24.583222 | C  | 54.557834 | 5.591822 | 23.007903 |
| C  | 33.858111 | 4.324738 | 23.758296 | C  | 55.929834 | 5.377808 | 23.052827 |
| C  | 29.856088 | 5.676605 | 25.886829 | C  | 56.515890 | 4.858790 | 24.200790 |
| C  | 29.301639 | 6.804090 | 26.518789 | O  | 56.643771 | 5.617813 | 21.841791 |
| C  | 43.550983 | 6.894735 | 26.561358 | O  | 51.638394 | 5.837344 | 26.121878 |
| C  | 42.724927 | 6.030474 | 25.854170 | O  | 51.335951 | 3.660021 | 26.633082 |

|   |           |          |           |    |           |          |           |
|---|-----------|----------|-----------|----|-----------|----------|-----------|
| C | 52.093702 | 4.666381 | 26.379749 | C  | 11.698220 | 3.178974 | 39.103108 |
| C | 49.466780 | 4.021882 | 22.293161 | C  | 10.356220 | 3.528979 | 39.024133 |
| C | 50.232747 | 2.940878 | 21.873109 | C  | 9.886236  | 4.637978 | 39.718145 |
| C | 50.321671 | 2.637891 | 20.519101 | O  | 9.453203  | 2.792985 | 38.218146 |
| C | 49.644629 | 3.416907 | 19.587145 | Cu | 17.237808 | 6.135646 | 41.480054 |
| C | 48.879663 | 4.496911 | 20.007197 | Cu | 16.684412 | 3.738845 | 41.985355 |
| C | 48.790739 | 4.799899 | 21.361205 | C  | 20.954842 | 4.056338 | 41.900202 |
| C | 48.023773 | 5.880903 | 21.783256 | C  | 21.454455 | 3.310901 | 42.984010 |
| C | 47.347732 | 6.658919 | 20.849300 | C  | 22.808564 | 3.017888 | 43.087851 |
| C | 47.437657 | 6.354932 | 19.496292 | C  | 23.691119 | 3.454209 | 42.105810 |
| C | 48.203622 | 5.273928 | 19.075240 | C  | 23.235106 | 4.173053 | 40.986264 |
| O | 46.763615 | 7.184949 | 18.538336 | C  | 21.848158 | 4.468278 | 40.869974 |
| O | 49.733195 | 5.591140 | 24.088507 | C  | 21.388102 | 5.128383 | 39.712077 |
| O | 49.385647 | 3.425870 | 24.607665 | C  | 22.283821 | 5.511533 | 38.717716 |
| C | 49.525978 | 4.368703 | 23.749005 | C  | 23.646310 | 5.253033 | 38.845693 |
| C | 45.481723 | 5.534630 | 25.980018 | C  | 24.132285 | 4.581006 | 39.971930 |
| C | 44.915559 | 6.653086 | 26.619370 | O  | 24.524198 | 5.629952 | 37.837637 |
| C | 45.172911 | 3.568990 | 24.513839 | O  | 19.146144 | 5.592303 | 41.622707 |
| O | 47.717957 | 6.337989 | 25.883236 | O  | 18.653728 | 3.442482 | 42.095423 |
| O | 47.397075 | 4.170940 | 26.420145 | C  | 19.498926 | 4.383211 | 41.871503 |
| C | 46.951657 | 5.331587 | 26.096531 | C  | 16.886269 | 4.115503 | 37.738444 |
| C | 49.198164 | 5.992701 | 30.212298 | C  | 17.590513 | 3.011020 | 37.227143 |
| C | 50.141056 | 6.835013 | 30.828603 | C  | 17.599833 | 2.741525 | 35.865521 |
| C | 48.083189 | 5.523882 | 30.961457 | C  | 16.904755 | 3.568972 | 34.990463 |
| C | 47.057438 | 4.759497 | 30.365385 | C  | 16.160232 | 4.670884 | 35.460868 |
| C | 45.984579 | 4.304189 | 31.125311 | C  | 16.129935 | 4.934273 | 36.855988 |
| O | 49.608222 | 6.566437 | 27.935081 | C  | 15.321806 | 5.985276 | 37.334378 |
| O | 49.301423 | 4.391510 | 28.452934 | C  | 14.607820 | 6.781657 | 36.448037 |
| C | 49.388914 | 5.628686 | 28.783243 | C  | 14.664590 | 6.564579 | 35.081445 |
| C | 11.158284 | 7.260965 | 41.959133 | C  | 15.447403 | 5.508349 | 34.562737 |
| C | 10.287267 | 6.502972 | 41.186144 | O  | 13.945899 | 7.443996 | 34.274501 |
| C | 10.757252 | 5.394972 | 40.491132 | O  | 17.238362 | 5.594750 | 39.570585 |
| C | 12.099252 | 5.042967 | 40.571107 | O  | 16.749430 | 3.438610 | 40.019711 |

|    |           |          |           |   |           |          |           |
|----|-----------|----------|-----------|---|-----------|----------|-----------|
| C  | 16.964635 | 4.398196 | 39.195446 | C | 38.546110 | 2.988417 | 42.934285 |
| C  | 12.972269 | 5.800962 | 41.346096 | C | 39.360660 | 3.433796 | 41.912879 |
| C  | 12.500284 | 6.908961 | 42.040108 | C | 38.836037 | 4.151246 | 40.789221 |
| C  | 26.840309 | 7.283476 | 42.044395 | C | 37.413178 | 4.377237 | 40.760731 |
| C  | 25.984161 | 6.405655 | 41.411632 | C | 36.841024 | 4.964672 | 39.600459 |
| C  | 26.455842 | 5.215182 | 40.769998 | C | 37.630832 | 5.397324 | 38.567845 |
| C  | 27.870447 | 4.942756 | 40.839844 | C | 39.046241 | 5.313528 | 38.649823 |
| C  | 12.571236 | 3.934968 | 39.877095 | C | 39.655709 | 4.653749 | 39.718335 |
| C  | 27.532428 | 2.949528 | 39.487381 | O | 39.794568 | 5.876196 | 37.662785 |
| C  | 26.134069 | 3.195060 | 39.433410 | O | 34.865399 | 5.562300 | 41.743651 |
| C  | 25.587180 | 4.309901 | 40.062990 | O | 34.327779 | 3.417485 | 42.158501 |
| O  | 25.449964 | 2.247676 | 38.725435 | C | 35.157385 | 4.340078 | 41.925204 |
| O  | 15.273980 | 6.431176 | 41.358584 | C | 32.580382 | 4.276861 | 37.889215 |
| O  | 14.773199 | 4.280387 | 41.811319 | C | 33.218538 | 3.132755 | 37.443278 |
| C  | 14.425278 | 5.479447 | 41.507302 | C | 33.242941 | 2.836970 | 36.064462 |
| C  | 16.704248 | 5.839495 | 45.706767 | C | 32.608393 | 3.664227 | 35.161538 |
| C  | 17.713574 | 6.603134 | 46.321448 | C | 31.900969 | 4.840463 | 35.573512 |
| C  | 18.796708 | 6.887805 | 32.224540 | C | 31.895049 | 5.148310 | 36.981530 |
| C  | 17.695473 | 6.450942 | 32.952307 | C | 31.158483 | 6.284794 | 37.427373 |
| C  | 16.664304 | 5.712263 | 32.340366 | C | 30.473093 | 7.069994 | 36.536350 |
| C  | 15.573968 | 5.432904 | 46.470112 | C | 30.491126 | 6.789491 | 35.142990 |
| C  | 14.486997 | 4.752308 | 45.881841 | C | 31.202325 | 5.698691 | 34.650509 |
| C  | 13.398884 | 4.359393 | 46.655347 | O | 29.775700 | 7.689224 | 34.405223 |
| C  | 14.503400 | 4.592247 | 32.438968 | O | 32.979622 | 5.744289 | 39.697555 |
| C  | 15.537051 | 5.284219 | 33.084245 | O | 32.386801 | 3.619415 | 40.147150 |
| O  | 13.390640 | 4.185588 | 33.166671 | C | 32.645363 | 4.571268 | 39.353750 |
| O  | 17.158502 | 6.438099 | 43.444577 | C | 28.728958 | 5.861280 | 41.530202 |
| O  | 16.645369 | 4.287845 | 43.894519 | C | 28.226213 | 7.022146 | 42.093253 |
| C  | 16.847899 | 5.500516 | 44.264085 | C | 42.250192 | 7.224182 | 41.986380 |
| Cu | 33.006899 | 6.341943 | 41.579173 | C | 41.431585 | 6.392637 | 41.229616 |
| Cu | 32.414230 | 3.864922 | 42.113982 | C | 41.965323 | 5.313138 | 40.499874 |
| C  | 36.608440 | 3.968295 | 41.870959 | C | 43.367691 | 5.072704 | 40.551023 |
| C  | 37.158012 | 3.257754 | 42.921841 | C | 28.373914 | 3.790086 | 40.168710 |

|    |           |          |           |   |           |          |           |
|----|-----------|----------|-----------|---|-----------|----------|-----------|
| C  | 43.077692 | 3.244283 | 38.983459 | O | 55.314970 | 5.617636 | 37.405141 |
| C  | 41.705946 | 3.436124 | 38.963899 | O | 50.368889 | 5.936445 | 41.720767 |
| C  | 41.127987 | 4.476547 | 39.719760 | O | 49.963060 | 3.764091 | 42.174383 |
| O  | 40.956260 | 2.545593 | 38.199895 | C | 50.770443 | 4.738257 | 41.954811 |
| O  | 30.996918 | 6.541087 | 41.470341 | C | 48.282612 | 4.397755 | 37.789090 |
| O  | 30.529294 | 4.420533 | 42.052320 | C | 49.078682 | 3.346279 | 37.300537 |
| C  | 30.194083 | 5.589087 | 41.687618 | C | 49.130582 | 3.063750 | 35.942596 |
| C  | 32.364171 | 5.966691 | 45.770634 | C | 48.385586 | 3.823352 | 35.047831 |
| C  | 33.249450 | 6.847702 | 46.365644 | C | 47.554588 | 4.872504 | 35.493295 |
| C  | 34.613168 | 6.770701 | 32.256354 | C | 47.488553 | 5.153960 | 36.884307 |
| C  | 33.497968 | 6.423021 | 33.010168 | C | 46.606789 | 6.155753 | 37.336462 |
| C  | 32.406083 | 5.752509 | 32.428043 | C | 45.846620 | 6.883524 | 36.429689 |
| C  | 31.261103 | 5.419766 | 46.505622 | C | 45.928103 | 6.644244 | 35.067793 |
| C  | 30.270937 | 4.594868 | 45.897572 | C | 46.788283 | 5.637145 | 34.574387 |
| C  | 29.217991 | 4.101033 | 46.628941 | O | 45.156225 | 7.455773 | 34.239135 |
| C  | 30.171078 | 4.803344 | 32.578023 | O | 48.493250 | 5.887592 | 39.638017 |
| C  | 31.262432 | 5.426002 | 33.193781 | O | 48.107636 | 3.705904 | 40.061992 |
| O  | 29.034754 | 4.513248 | 33.321919 | C | 48.296408 | 4.680149 | 39.248806 |
| O  | 32.901819 | 6.550063 | 43.553654 | C | 44.193699 | 5.894552 | 41.368423 |
| O  | 32.465768 | 4.390801 | 44.009439 | C | 43.616082 | 6.978820 | 42.054942 |
| C  | 32.592355 | 5.606228 | 44.336072 | C | 43.909741 | 4.042631 | 39.759405 |
| Cu | 48.441492 | 6.410283 | 41.555429 | O | 46.465041 | 6.633558 | 41.416382 |
| Cu | 47.983589 | 3.986829 | 42.027227 | O | 46.053329 | 4.452407 | 41.812406 |
| C  | 52.242277 | 4.464616 | 41.931345 | C | 45.656818 | 5.643657 | 41.537853 |
| C  | 52.828352 | 3.947593 | 43.079296 | C | 47.841397 | 6.059776 | 45.765586 |
| C  | 54.201352 | 3.732573 | 43.123194 | C | 48.796637 | 6.875418 | 46.400278 |
| C  | 54.987277 | 4.036578 | 42.018142 | C | 50.024141 | 7.174525 | 32.170322 |
| C  | 54.401202 | 4.554601 | 40.869191 | C | 48.959698 | 6.684641 | 32.919352 |
| C  | 53.028202 | 4.768621 | 40.826292 | C | 47.977994 | 5.859687 | 32.337149 |
| C  | 52.442128 | 5.287645 | 39.677341 | C | 46.721866 | 5.589397 | 46.507984 |
| C  | 53.229054 | 5.591649 | 38.571289 | C | 45.679875 | 4.859026 | 45.898336 |
| C  | 54.601054 | 5.377629 | 38.616189 | C | 44.606280 | 4.397314 | 46.654077 |
| C  | 55.187129 | 4.858606 | 39.764139 | C | 45.903673 | 4.591181 | 32.485508 |

|    |           |          |           |   |           |          |           |
|----|-----------|----------|-----------|---|-----------|----------|-----------|
| C  | 46.887642 | 5.376318 | 33.101937 | C | 15.024817 | 4.774001 | 51.022524 |
| O  | 44.828638 | 4.125626 | 33.233986 | C | 14.960921 | 5.042663 | 52.416847 |
| O  | 48.322276 | 6.691552 | 43.519442 | C | 14.158569 | 6.109023 | 52.869363 |
| O  | 47.880566 | 4.519787 | 43.940463 | C | 13.479543 | 6.911573 | 51.961022 |
| C  | 48.028912 | 5.736299 | 44.324129 | C | 13.559740 | 6.681026 | 50.597615 |
| C  | 9.830844  | 7.260885 | 57.522289 | C | 14.334198 | 5.607243 | 50.103282 |
| C  | 8.959813  | 6.502896 | 56.749314 | O | 12.867105 | 7.561255 | 49.768861 |
| C  | 9.429780  | 5.394897 | 56.054290 | O | 15.948617 | 5.648566 | 55.206299 |
| C  | 10.771780 | 5.042887 | 56.134240 | O | 15.434913 | 3.484158 | 55.580188 |
| C  | 10.370715 | 3.178901 | 54.666241 | C | 15.685016 | 4.463099 | 54.789124 |
| C  | 9.028715  | 3.528910 | 54.587291 | C | 11.644813 | 5.800876 | 56.909215 |
| C  | 8.558747  | 4.637908 | 55.281315 | C | 11.172845 | 6.908875 | 57.603239 |
| O  | 8.125681  | 2.792922 | 53.781316 | C | 25.311261 | 7.039098 | 57.578001 |
| Cu | 15.895645 | 6.132391 | 57.134124 | C | 24.476974 | 6.213052 | 56.834169 |
| Cu | 15.338916 | 3.719960 | 57.552937 | C | 24.987570 | 5.109013 | 56.120612 |
| C  | 19.593741 | 4.027163 | 57.441415 | C | 26.382457 | 4.841102 | 56.173241 |
| C  | 20.142857 | 3.263206 | 58.486909 | C | 11.243748 | 3.934890 | 55.440215 |
| C  | 21.494244 | 2.942049 | 58.501710 | C | 26.056407 | 2.990375 | 54.635927 |
| C  | 22.320469 | 3.369996 | 57.467941 | C | 24.689758 | 3.214383 | 54.608860 |
| C  | 21.808916 | 4.113833 | 56.387270 | C | 24.129593 | 4.276520 | 55.354178 |
| C  | 20.425231 | 4.433626 | 56.360647 | O | 23.923312 | 2.336376 | 53.845419 |
| C  | 19.904368 | 5.116817 | 55.241202 | O | 13.940655 | 6.429316 | 56.972026 |
| C  | 20.741325 | 5.505655 | 54.199953 | O | 13.433461 | 4.268986 | 57.371170 |
| C  | 22.106073 | 5.231898 | 54.243579 | C | 13.091660 | 5.473969 | 57.085286 |
| C  | 22.651839 | 4.528424 | 55.326177 | C | 15.283042 | 5.695809 | 61.352094 |
| O  | 22.930656 | 5.628281 | 53.196737 | C | 16.314083 | 6.385792 | 61.978046 |
| O  | 17.797050 | 5.585629 | 57.300597 | C | 17.645225 | 6.924145 | 47.670710 |
| O  | 17.301622 | 3.415556 | 57.672104 | C | 16.563271 | 6.495405 | 48.431241 |
| C  | 18.145513 | 4.363826 | 57.483638 | C | 15.516445 | 5.751972 | 47.853588 |
| C  | 15.672731 | 4.209178 | 53.323015 | C | 14.198077 | 5.242813 | 62.095147 |
| C  | 16.386229 | 3.101758 | 52.829704 | C | 13.166036 | 4.552830 | 61.469195 |
| C  | 16.439074 | 2.836118 | 51.468537 | C | 12.083071 | 4.099834 | 62.213248 |
| C  | 15.774372 | 3.666853 | 50.574100 | C | 13.360139 | 4.632120 | 48.020508 |



|    |           |          |           |    |           |          |           |
|----|-----------|----------|-----------|----|-----------|----------|-----------|
| C  | 14.405651 | 5.338934 | 48.630006 | O  | 31.055455 | 3.425799 | 55.606046 |
| O  | 12.265172 | 4.235497 | 48.780228 | C  | 31.272352 | 4.403033 | 54.803475 |
| O  | 15.761175 | 6.375298 | 59.107652 | C  | 27.223168 | 5.663262 | 56.973573 |
| O  | 15.277540 | 4.204198 | 59.478520 | C  | 26.670812 | 6.768571 | 57.646289 |
| C  | 15.447082 | 5.408104 | 59.892374 | C  | 40.909118 | 6.941376 | 57.615612 |
| Cu | 31.471375 | 6.100115 | 57.130494 | C  | 40.084629 | 6.115358 | 56.863070 |
| Cu | 30.964506 | 3.680786 | 57.576407 | C  | 40.605708 | 5.021092 | 56.141787 |
| C  | 35.210356 | 4.044504 | 57.454435 | C  | 42.004179 | 4.765710 | 56.191814 |
| C  | 35.754718 | 3.315823 | 58.527771 | C  | 26.902858 | 3.785480 | 55.398495 |
| C  | 37.102785 | 2.983307 | 58.554737 | C  | 41.690858 | 2.913792 | 54.654345 |
| C  | 37.931628 | 3.363763 | 57.505410 | C  | 40.322516 | 3.129433 | 54.624558 |
| C  | 37.426851 | 4.073879 | 56.399334 | C  | 39.753801 | 4.188397 | 55.368277 |
| C  | 36.045834 | 4.407209 | 56.361592 | O  | 39.563021 | 2.244466 | 53.862286 |
| C  | 35.531662 | 5.057387 | 55.220480 | O  | 29.502455 | 6.364669 | 57.012089 |
| C  | 36.372552 | 5.399156 | 54.165498 | O  | 29.050641 | 4.189855 | 57.403000 |
| C  | 37.735076 | 5.113496 | 54.218938 | C  | 28.677574 | 5.389243 | 57.136867 |
| C  | 38.274963 | 4.442976 | 55.325477 | C  | 30.903116 | 5.695628 | 61.351271 |
| O  | 38.563625 | 5.466898 | 53.160032 | C  | 31.934171 | 6.385605 | 61.977208 |
| O  | 33.389592 | 5.580204 | 57.265984 | C  | 33.110934 | 7.174802 | 47.732253 |
| O  | 32.929190 | 3.411891 | 57.689080 | C  | 32.084109 | 6.636853 | 48.478216 |
| C  | 33.757852 | 4.367767 | 57.477820 | C  | 31.116629 | 5.750869 | 47.900836 |
| C  | 31.274785 | 4.130979 | 53.341351 | C  | 29.818163 | 5.242633 | 62.094342 |
| C  | 32.056319 | 3.064878 | 52.861120 | C  | 28.786109 | 4.552656 | 61.468406 |
| C  | 32.141577 | 2.799186 | 51.501473 | C  | 27.703155 | 4.099663 | 62.212477 |
| C  | 31.440926 | 3.587605 | 50.595907 | C  | 29.094658 | 4.379076 | 48.016573 |
| C  | 30.620485 | 4.647128 | 51.032097 | C  | 30.024932 | 5.198816 | 48.652550 |
| C  | 30.525940 | 4.917633 | 52.423876 | O  | 28.059697 | 3.848787 | 48.724685 |
| C  | 29.664051 | 5.942532 | 52.861867 | O  | 31.370698 | 6.358423 | 59.101964 |
| C  | 28.953581 | 6.702335 | 51.939441 | O  | 30.907404 | 4.186411 | 59.495455 |
| C  | 29.062611 | 6.469476 | 50.578636 | C  | 31.068824 | 5.395903 | 59.896207 |
| C  | 29.894509 | 5.435150 | 50.106647 | Cu | 47.051586 | 6.250040 | 57.150987 |
| O  | 28.342829 | 7.308749 | 49.732626 | Cu | 46.688727 | 3.793537 | 57.533597 |
| O  | 31.496897 | 5.601595 | 55.205187 | C  | 50.914826 | 4.464382 | 57.493755 |

|   |           |          |           |   |           |          |           |
|---|-----------|----------|-----------|---|-----------|----------|-----------|
| C | 51.500920 | 3.947352 | 58.641694 | C | 46.523192 | 5.695393 | 61.350166 |
| C | 52.873920 | 3.732327 | 58.685568 | C | 47.554258 | 6.385364 | 61.976087 |
| C | 53.659827 | 4.036331 | 57.580503 | C | 48.688304 | 7.186235 | 47.749091 |
| C | 53.073733 | 4.554362 | 56.431564 | C | 47.620892 | 6.692848 | 48.489925 |
| C | 51.700733 | 4.768387 | 56.388690 | C | 46.627533 | 5.893200 | 47.892736 |
| C | 51.114640 | 5.287417 | 55.239751 | C | 45.438249 | 5.242399 | 62.093255 |
| C | 51.901547 | 5.591423 | 54.133687 | C | 44.406182 | 4.552428 | 61.467335 |
| C | 53.273547 | 5.377397 | 54.178561 | C | 43.323240 | 4.099435 | 62.211424 |
| C | 53.859639 | 4.858367 | 55.326499 | C | 44.540039 | 4.645668 | 48.022819 |
| O | 53.987443 | 5.617405 | 52.967501 | C | 45.535750 | 5.405013 | 48.652476 |
| O | 48.992008 | 5.859470 | 57.302818 | O | 43.465996 | 4.170756 | 48.766837 |
| O | 48.673727 | 3.654845 | 57.669077 | O | 46.919693 | 6.443394 | 59.123893 |
| C | 49.438558 | 4.672408 | 57.498548 | O | 46.574958 | 4.238585 | 59.462106 |
| C | 46.969302 | 4.364735 | 53.316790 | C | 46.675347 | 5.443513 | 59.891150 |
| C | 47.787874 | 3.342181 | 52.804565 | C | 16.262158 | 6.620778 | 63.347051 |
| C | 47.843861 | 3.089791 | 51.441393 | C | 15.179191 | 6.168782 | 64.090104 |
| C | 47.078998 | 3.849995 | 50.564346 | C | 14.147152 | 5.478800 | 63.465152 |
| C | 46.227749 | 4.872800 | 51.032652 | C | 12.031146 | 4.336820 | 63.582253 |
| C | 46.159843 | 5.124982 | 52.429454 | C | 13.063187 | 5.025805 | 64.207205 |
| C | 45.260056 | 6.099982 | 52.903780 | O | 10.943183 | 3.908824 | 64.361306 |
| C | 44.486972 | 6.833961 | 52.013336 | C | 31.882271 | 6.620587 | 63.346214 |
| C | 44.568495 | 6.623172 | 50.646869 | C | 30.799317 | 6.168593 | 64.089284 |
| C | 45.442835 | 5.639421 | 50.130762 | C | 29.767262 | 5.478616 | 63.464348 |
| O | 43.782698 | 7.440551 | 49.837170 | C | 27.651255 | 4.336645 | 63.581483 |
| O | 47.125699 | 5.801179 | 55.215525 | C | 28.683309 | 5.025622 | 64.206418 |
| O | 46.815183 | 3.593541 | 55.561816 | O | 26.563304 | 3.908650 | 64.360554 |
| C | 46.969647 | 4.601749 | 54.784134 | C | 47.502385 | 6.620342 | 63.345096 |
| C | 42.838195 | 5.597870 | 56.988961 | C | 46.419443 | 6.168348 | 64.088184 |
| C | 42.270981 | 6.687414 | 57.676311 | C | 45.387375 | 5.478376 | 63.463264 |
| C | 42.532522 | 3.716595 | 55.414748 | C | 43.271365 | 4.336411 | 63.580432 |
| O | 45.077332 | 6.397597 | 57.020866 | C | 44.303433 | 5.025383 | 64.205353 |
| O | 44.743757 | 4.191706 | 57.350772 | O | 42.183428 | 3.908416 | 64.359522 |
| C | 44.305767 | 5.377758 | 57.120951 | H | 12.119252 | 8.127090 | 26.935733 |

|   |           |          |           |   |           |          |           |
|---|-----------|----------|-----------|---|-----------|----------|-----------|
| H | 10.573040 | 6.786843 | 25.566353 | H | 31.124714 | 7.499464 | 21.165138 |
| H | 13.383774 | 2.323382 | 22.982327 | H | 29.935512 | 7.474321 | 27.088164 |
| H | 9.847486  | 3.169741 | 22.676924 | H | 43.130010 | 7.759417 | 27.064750 |
| H | 22.122524 | 2.849730 | 28.236932 | H | 41.668792 | 6.257376 | 25.827433 |
| H | 24.519085 | 2.297386 | 28.278066 | H | 30.604603 | 3.537057 | 24.326898 |
| H | 25.995015 | 3.052043 | 26.484767 | H | 44.742274 | 1.890784 | 23.249610 |
| H | 21.477422 | 5.221199 | 24.048160 | H | 35.544522 | 6.722433 | 30.334068 |
| H | 22.959786 | 5.909982 | 22.270101 | H | 31.299690 | 4.565577 | 29.394678 |
| H | 19.532097 | 2.329493 | 22.589889 | H | 29.356685 | 4.043777 | 30.737576 |
| H | 19.679348 | 1.794080 | 20.190520 | H | 31.292289 | 6.861218 | 17.596351 |
| H | 18.480483 | 3.170803 | 18.536736 | H | 40.789737 | 5.827744 | 21.471992 |
| H | 16.651495 | 6.145383 | 22.827126 | H | 41.219494 | 2.248488 | 23.029848 |
| H | 15.506921 | 7.501017 | 21.165194 | H | 53.551978 | 3.700079 | 28.381241 |
| H | 14.495576 | 7.508130 | 27.087612 | H | 55.987708 | 3.326145 | 28.455755 |
| H | 27.525279 | 7.933278 | 26.946725 | H | 57.384060 | 3.866333 | 26.497859 |
| H | 26.051702 | 6.439018 | 25.707250 | H | 52.703461 | 5.452019 | 24.014190 |
| H | 14.941535 | 3.634123 | 24.311218 | H | 54.081068 | 5.975951 | 22.116790 |
| H | 29.108653 | 2.089057 | 23.084409 | H | 50.777604 | 2.335082 | 22.589415 |
| H | 19.772357 | 6.914830 | 30.323665 | H | 50.920920 | 1.795284 | 20.189774 |
| H | 15.671536 | 4.535641 | 29.265929 | H | 49.720355 | 3.170948 | 18.535941 |
| H | 13.761618 | 3.833567 | 30.568862 | H | 47.863169 | 6.134688 | 22.823873 |
| H | 15.672066 | 6.861242 | 17.596385 | H | 46.741200 | 7.496820 | 21.164933 |
| H | 25.082245 | 6.055773 | 21.435046 | H | 45.546056 | 7.340322 | 27.172211 |
| H | 25.585185 | 2.442927 | 22.887539 | H | 46.234978 | 3.353973 | 24.482981 |
| H | 37.676868 | 2.912531 | 28.333288 | H | 50.979512 | 7.219106 | 30.258730 |
| H | 40.058520 | 2.312459 | 28.425488 | H | 47.060389 | 4.512697 | 29.309092 |
| H | 41.569253 | 2.961096 | 26.620924 | H | 45.212761 | 3.716850 | 30.646544 |
| H | 37.136461 | 5.183844 | 24.076370 | H | 46.912914 | 6.861743 | 17.595811 |
| H | 38.655580 | 5.768205 | 22.287918 | H | 56.056148 | 5.977148 | 21.104161 |
| H | 35.148141 | 2.327644 | 22.590747 | H | 10.790930 | 8.128028 | 42.498493 |
| H | 35.298438 | 1.793462 | 20.190382 | H | 9.244464  | 6.787120 | 41.129909 |
| H | 34.099971 | 3.170596 | 18.536513 | H | 12.055536 | 2.325174 | 38.543890 |
| H | 32.263757 | 6.143629 | 22.825814 | H | 8.519524  | 3.171537 | 38.239162 |

|   |           |          |           |   |           |          |           |
|---|-----------|----------|-----------|---|-----------|----------|-----------|
| H | 20.782217 | 2.969571 | 43.763376 | H | 29.890012 | 7.931560 | 36.872465 |
| H | 23.178397 | 2.452057 | 43.937308 | H | 28.907180 | 7.719167 | 42.588655 |
| H | 24.740155 | 3.211994 | 42.221109 | H | 41.821349 | 8.061305 | 42.528286 |
| H | 20.336247 | 5.341268 | 39.549184 | H | 40.372712 | 6.611900 | 41.202209 |
| H | 21.906071 | 6.014112 | 37.837351 | H | 29.442492 | 3.574205 | 40.188391 |
| H | 18.146402 | 2.363963 | 37.896009 | H | 43.501688 | 2.450337 | 38.382861 |
| H | 18.153845 | 1.889683 | 35.483994 | H | 34.063229 | 7.270539 | 45.770655 |
| H | 16.938052 | 3.327969 | 33.937487 | H | 35.440106 | 7.297791 | 32.722237 |
| H | 15.216573 | 6.200774 | 38.391635 | H | 33.489557 | 6.697202 | 34.057451 |
| H | 13.995061 | 7.590421 | 36.823076 | H | 30.338966 | 4.354124 | 44.836360 |
| H | 13.169420 | 7.511204 | 42.645486 | H | 28.462622 | 3.474984 | 46.139173 |
| H | 26.441480 | 8.189006 | 42.512754 | H | 28.340251 | 4.013099 | 32.786040 |
| H | 24.915626 | 6.644360 | 41.397851 | H | 29.727509 | 7.450269 | 33.466694 |
| H | 13.612093 | 3.634333 | 39.867546 | H | 39.222214 | 6.451749 | 37.125058 |
| H | 27.914902 | 2.071887 | 38.959670 | H | 39.963697 | 2.719751 | 38.240064 |
| H | 18.566480 | 6.940683 | 45.743335 | H | 52.223438 | 3.710469 | 43.947444 |
| H | 19.574911 | 7.467138 | 32.711428 | H | 54.659353 | 3.328256 | 44.019942 |
| H | 17.647180 | 6.709005 | 34.001552 | H | 56.055400 | 3.866636 | 42.061220 |
| H | 14.453123 | 4.525700 | 44.821530 | H | 51.374751 | 5.452183 | 39.578203 |
| H | 12.580038 | 3.834442 | 46.182435 | H | 52.752203 | 5.975600 | 37.680019 |
| H | 12.732622 | 3.667480 | 32.603876 | H | 49.669831 | 2.748617 | 37.985061 |
| H | 14.000759 | 7.215023 | 33.296770 | H | 49.752621 | 2.251602 | 35.579756 |
| H | 24.065422 | 6.134906 | 37.093671 | H | 48.450269 | 3.570554 | 33.999099 |
| H | 24.499282 | 2.431423 | 38.669869 | H | 46.480087 | 6.384885 | 38.388419 |
| H | 36.517684 | 2.927095 | 43.744176 | H | 45.173958 | 7.652710 | 36.784868 |
| H | 38.979901 | 2.430370 | 43.770206 | H | 44.236329 | 7.630248 | 42.660283 |
| H | 40.433479 | 3.223156 | 41.966853 | H | 44.975813 | 3.846026 | 39.716233 |
| H | 35.761220 | 5.102847 | 39.527682 | H | 49.637952 | 7.263842 | 45.837477 |
| H | 37.171791 | 5.863455 | 37.690771 | H | 50.764434 | 7.818395 | 32.634617 |
| H | 33.711370 | 2.476330 | 38.164957 | H | 48.900243 | 6.967727 | 33.961580 |
| H | 33.765964 | 1.943489 | 35.709255 | H | 45.669634 | 4.645689 | 44.834900 |
| H | 32.644909 | 3.392287 | 34.101774 | H | 43.821190 | 3.836766 | 46.164967 |
| H | 31.127296 | 6.529344 | 38.490208 | H | 44.204219 | 3.547074 | 32.692046 |

|   |           |          |           |   |           |          |           |
|---|-----------|----------|-----------|---|-----------|----------|-----------|
| H | 45.237817 | 7.215666 | 33.265942 | H | 34.479040 | 5.301046 | 55.121334 |
| H | 54.726458 | 5.972420 | 36.665853 | H | 35.955391 | 5.897587 | 53.301005 |
| H | 9.463360  | 8.127006 | 58.062982 | H | 32.614859 | 2.445131 | 53.553613 |
| H | 7.916941  | 6.786689 | 56.693566 | H | 32.757117 | 1.978914 | 51.145565 |
| H | 10.728176 | 2.325380 | 54.106699 | H | 31.533974 | 3.349525 | 49.544602 |
| H | 7.191621  | 3.170383 | 53.803725 | H | 29.517627 | 6.166525 | 53.913280 |
| H | 19.511500 | 2.924663 | 59.300577 | H | 28.299367 | 7.492823 | 52.283088 |
| H | 21.905284 | 2.358931 | 59.319744 | H | 27.305750 | 7.416137 | 58.240199 |
| H | 23.367526 | 3.102139 | 57.511310 | H | 40.488936 | 7.784705 | 58.154427 |
| H | 18.849099 | 5.349710 | 55.146582 | H | 39.030539 | 6.350917 | 56.836625 |
| H | 20.318622 | 6.029976 | 53.353632 | H | 27.963581 | 3.566193 | 55.354965 |
| H | 16.912771 | 2.445924 | 53.513711 | H | 42.104104 | 2.105649 | 54.065855 |
| H | 16.999208 | 1.981229 | 51.102954 | H | 32.788964 | 6.737424 | 61.409690 |
| H | 15.837471 | 3.425518 | 49.522577 | H | 33.826480 | 7.856815 | 48.202526 |
| H | 14.031272 | 6.332745 | 53.922436 | H | 32.007450 | 6.908242 | 49.535806 |
| H | 12.871130 | 7.732381 | 52.316358 | H | 28.748371 | 4.376085 | 60.399705 |
| H | 11.840599 | 7.509022 | 58.212429 | H | 26.897578 | 3.574785 | 61.718349 |
| H | 24.899359 | 7.891635 | 58.108725 | H | 27.517369 | 3.288720 | 48.145926 |
| H | 23.424400 | 6.456389 | 56.806062 | H | 28.462973 | 7.088191 | 48.755710 |
| H | 12.285087 | 3.636260 | 55.426932 | H | 38.072009 | 5.973122 | 52.438768 |
| H | 26.463921 | 2.179547 | 54.047080 | H | 38.581141 | 2.461514 | 53.869338 |
| H | 17.168444 | 6.739050 | 61.410671 | H | 50.894970 | 3.700094 | 59.506373 |
| H | 18.436933 | 7.506766 | 48.131301 | H | 53.331570 | 3.325517 | 59.581306 |
| H | 16.543343 | 6.761693 | 49.479359 | H | 54.727839 | 3.865721 | 57.623142 |
| H | 13.128566 | 4.376335 | 60.400533 | H | 50.047618 | 5.459615 | 55.145580 |
| H | 11.277757 | 3.574562 | 61.719224 | H | 51.424868 | 5.977059 | 53.243037 |
| H | 11.593312 | 3.711115 | 48.240226 | H | 48.390744 | 2.741086 | 53.475892 |
| H | 12.958261 | 7.337255 | 48.792546 | H | 48.482924 | 2.299133 | 51.061245 |
| H | 22.432852 | 6.152348 | 52.492650 | H | 47.145705 | 3.618819 | 49.510958 |
| H | 22.942636 | 2.559177 | 53.855066 | H | 45.128858 | 6.303469 | 53.960548 |
| H | 35.120207 | 3.008213 | 59.351237 | H | 43.802783 | 7.584683 | 52.385603 |
| H | 37.508407 | 2.425201 | 59.392639 | H | 42.899112 | 7.342283 | 58.269660 |
| H | 38.975533 | 3.085611 | 57.557402 | H | 43.595040 | 3.507334 | 55.368340 |

|   |           |           |           |                                 |           |           |           |
|---|-----------|-----------|-----------|---------------------------------|-----------|-----------|-----------|
| H | 48.405704 | 6.744514  | 61.407923 | C                               | 31.155787 | 9.953578  | 42.094815 |
| H | 49.437593 | 7.810829  | 48.225131 | C                               | 32.209274 | 9.672947  | 43.178136 |
| H | 47.568867 | 6.953351  | 49.538348 | O                               | 33.575010 | 8.413976  | 41.512198 |
| H | 44.381641 | 4.364054  | 60.399410 | C                               | 36.599684 | 8.164971  | 39.474195 |
| H | 42.519372 | 3.571558  | 61.717697 | C                               | 37.727157 | 8.610236  | 38.752383 |
| H | 42.838418 | 3.602761  | 48.217489 | C                               | 37.669501 | 8.761189  | 37.363445 |
| H | 43.870941 | 7.227318  | 48.858495 | C                               | 36.490968 | 8.479299  | 36.658642 |
| H | 53.398644 | 5.970533  | 52.227582 | C                               | 35.360886 | 8.059194  | 37.375454 |
| H | 17.068304 | 7.157901  | 63.836040 | C                               | 35.406421 | 7.912026  | 38.761762 |
| H | 15.148106 | 6.357215  | 65.155558 | N                               | 36.646419 | 7.975368  | 40.850083 |
| H | 10.263187 | 3.421715  | 63.797072 | H                               | 33.424912 | 11.372976 | 39.851047 |
| H | 32.688463 | 7.157561  | 63.835223 | H                               | 34.973587 | 9.886519  | 40.958247 |
| H | 30.768039 | 6.357124  | 65.154696 | H                               | 34.385151 | 9.203722  | 43.298924 |
| H | 25.881974 | 3.423930  | 63.795755 | H                               | 30.872623 | 11.268178 | 40.373705 |
| H | 48.307538 | 7.159075  | 63.833774 | H                               | 31.914621 | 11.927645 | 41.647797 |
| H | 46.387782 | 6.357268  | 65.153495 | H                               | 30.225140 | 10.307008 | 42.574422 |
| H | 41.501340 | 3.424937  | 63.794467 | H                               | 30.912195 | 9.011103  | 41.573255 |
| H | 54.922538 | 4.682761  | 55.325772 | H                               | 32.325296 | 10.556153 | 43.837136 |
| H | 56.250071 | 4.683131  | 39.763677 | H                               | 31.909748 | 8.822423  | 43.813851 |
| H | 57.578875 | 4.683434  | 24.200636 | H                               | 32.627852 | 9.829813  | 39.512314 |
| H | 32.654315 | 5.043362  | 18.026547 | H                               | 38.665852 | 8.801899  | 39.283567 |
| H | 17.034831 | 5.043603  | 18.026692 | H                               | 38.562150 | 9.103423  | 36.826595 |
| H | 10.176567 | 4.915314  | 24.089625 | H                               | 36.450897 | 8.591910  | 35.570907 |
| H | 8.848003  | 4.915581  | 39.653302 | H                               | 34.427174 | 7.824886  | 36.852376 |
| H | 7.520566  | 4.915543  | 55.216449 | H                               | 34.529103 | 7.541210  | 39.295049 |
| H | 12.998935 | 5.198973  | 65.269012 | H                               | 35.979630 | 7.293304  | 41.218946 |
| H | 28.618777 | 5.198922  | 65.268152 | H                               | 37.577837 | 7.836505  | 41.233798 |
| H | 44.238638 | 5.198805  | 65.267027 |                                 |           |           |           |
| H | 48.273973 | 5.043176  | 18.026079 | (S,S)-1-RC (open-shell singlet) |           |           |           |
| C | 33.565426 | 9.365217  | 42.584987 | C                               | 12.487000 | 7.261000  | 26.395000 |
| C | 33.910351 | 9.783152  | 41.205805 | C                               | 11.616000 | 6.503000  | 25.622000 |
| C | 32.913167 | 10.518689 | 40.329034 | C                               | 12.086000 | 5.395000  | 24.927000 |
| C | 31.665641 | 10.999859 | 41.094071 | C                               | 13.428000 | 5.043000  | 25.007000 |

|    |           |          |           |    |           |          |           |
|----|-----------|----------|-----------|----|-----------|----------|-----------|
| C  | 13.027000 | 3.179000 | 23.539000 | C  | 18.263945 | 4.335758 | 23.745203 |
| C  | 11.685000 | 3.529000 | 23.460000 | C  | 14.301000 | 5.801000 | 25.782000 |
| C  | 11.215000 | 4.638000 | 24.154000 | C  | 13.829000 | 6.909000 | 26.476000 |
| O  | 10.782000 | 2.793000 | 22.654000 | C  | 27.939965 | 7.064609 | 26.445164 |
| Cu | 18.544566 | 6.083742 | 26.015556 | C  | 27.106590 | 6.205754 | 25.736963 |
| Cu | 17.949064 | 3.696088 | 26.527824 | C  | 27.621154 | 5.081391 | 25.059064 |
| C  | 22.213397 | 3.943415 | 26.372783 | C  | 29.017624 | 4.824774 | 25.114902 |
| C  | 22.757992 | 3.186169 | 27.425551 | C  | 13.900000 | 3.935000 | 24.313000 |
| C  | 24.111644 | 2.874477 | 27.453900 | C  | 28.698126 | 2.918068 | 23.645146 |
| C  | 24.945637 | 3.308478 | 26.428655 | C  | 27.330242 | 3.131362 | 23.617155 |
| C  | 24.438513 | 4.042117 | 25.339267 | C  | 26.766415 | 4.216580 | 24.325246 |
| C  | 23.051717 | 4.345767 | 25.294950 | O  | 26.567004 | 2.224728 | 22.884458 |
| C  | 22.535193 | 5.008997 | 24.161246 | O  | 16.597062 | 6.402542 | 25.851275 |
| C  | 23.379497 | 5.400902 | 23.127116 | O  | 16.054757 | 4.263354 | 26.319282 |
| C  | 24.747270 | 5.148268 | 23.190800 | C  | 15.735970 | 5.461599 | 25.984937 |
| C  | 25.288474 | 4.460558 | 24.285477 | C  | 17.910463 | 5.816822 | 30.229028 |
| O  | 25.579114 | 5.545574 | 22.149817 | C  | 18.902882 | 6.575867 | 30.875514 |
| O  | 20.435305 | 5.514917 | 26.186742 | C  | 16.756480 | 5.410482 | 30.955936 |
| O  | 19.911531 | 3.369255 | 26.648707 | C  | 15.680859 | 4.744451 | 30.330391 |
| C  | 20.768045 | 4.296764 | 26.413825 | C  | 14.571889 | 4.345186 | 31.070310 |
| C  | 18.226927 | 4.022014 | 22.293999 | O  | 18.433555 | 6.400239 | 27.976640 |
| C  | 18.992915 | 2.941012 | 21.873981 | O  | 17.897081 | 4.255826 | 28.429782 |
| C  | 19.081890 | 2.638017 | 20.519979 | C  | 18.097335 | 5.469877 | 28.794498 |
| C  | 18.404876 | 3.417024 | 19.587993 | Cu | 34.115147 | 6.055775 | 26.054497 |
| C  | 17.639888 | 4.497025 | 20.008011 | Cu | 33.556545 | 3.658606 | 26.554235 |
| C  | 17.550913 | 4.800019 | 21.362013 | C  | 37.812133 | 3.939132 | 26.433352 |
| C  | 16.783924 | 5.881020 | 21.784030 | C  | 38.329217 | 3.210002 | 27.519946 |
| C  | 16.107910 | 6.659026 | 20.850045 | C  | 39.674217 | 2.869094 | 27.576428 |
| C  | 16.197885 | 6.355032 | 19.497042 | C  | 40.527676 | 3.242494 | 26.544433 |
| C  | 16.963876 | 5.274031 | 19.076025 | C  | 40.049854 | 3.949862 | 25.424926 |
| O  | 15.523872 | 7.185038 | 18.539057 | C  | 38.671978 | 4.290355 | 25.355946 |
| O  | 18.564826 | 5.528450 | 24.111931 | C  | 38.185764 | 4.936996 | 24.200472 |
| O  | 18.020439 | 3.387577 | 24.573172 | C  | 39.051193 | 5.270153 | 23.162651 |

|   |           |          |           |    |           |          |           |
|---|-----------|----------|-----------|----|-----------|----------|-----------|
| C | 40.410407 | 4.976707 | 23.246602 | C  | 31.305582 | 5.394588 | 26.075985 |
| C | 40.921780 | 4.308247 | 24.367476 | C  | 33.611588 | 5.751216 | 30.286976 |
| O | 41.263904 | 5.320732 | 22.204146 | C  | 34.667485 | 6.443625 | 30.907379 |
| O | 36.021156 | 5.500884 | 26.193097 | C  | 32.453746 | 5.421451 | 31.045883 |
| O | 35.516923 | 3.352994 | 26.665894 | C  | 31.331533 | 4.808172 | 30.452515 |
| C | 36.365130 | 4.287290 | 26.435136 | C  | 30.207282 | 4.509779 | 31.216968 |
| C | 33.846855 | 4.021974 | 22.293721 | O  | 34.041738 | 6.352069 | 28.021172 |
| C | 34.612832 | 2.940971 | 21.873686 | O  | 33.514011 | 4.204498 | 28.468808 |
| C | 34.701783 | 2.637980 | 20.519681 | C  | 33.733363 | 5.414019 | 28.840829 |
| C | 34.024755 | 3.416991 | 19.587710 | Cu | 49.697168 | 6.205848 | 25.981152 |
| C | 33.259777 | 4.496993 | 20.007743 | Cu | 49.346545 | 3.788002 | 26.562760 |
| C | 33.170827 | 4.799985 | 21.361749 | C  | 53.571004 | 4.464799 | 26.367945 |
| C | 32.403849 | 5.880988 | 21.783783 | C  | 54.157059 | 3.947781 | 27.515908 |
| C | 31.727822 | 6.658998 | 20.849812 | C  | 55.530060 | 3.732767 | 27.559832 |
| C | 31.817772 | 6.355006 | 19.496807 | C  | 56.316003 | 4.036770 | 26.454793 |
| C | 32.583750 | 5.274004 | 19.075773 | C  | 55.729947 | 4.554788 | 25.305829 |
| O | 31.143744 | 7.185017 | 18.538837 | C  | 54.356948 | 4.768802 | 25.262905 |
| O | 34.123586 | 5.521645 | 24.139514 | C  | 53.770890 | 5.287820 | 24.113942 |
| O | 33.626877 | 3.367683 | 24.583222 | C  | 54.557834 | 5.591822 | 23.007903 |
| C | 33.858111 | 4.324738 | 23.758296 | C  | 55.929834 | 5.377808 | 23.052827 |
| C | 29.856088 | 5.676605 | 25.886829 | C  | 56.515890 | 4.858790 | 24.200790 |
| C | 29.301639 | 6.804090 | 26.518789 | O  | 56.643771 | 5.617813 | 21.841791 |
| C | 43.550983 | 6.894735 | 26.561358 | O  | 51.638394 | 5.837344 | 26.121878 |
| C | 42.724927 | 6.030474 | 25.854170 | O  | 51.335951 | 3.660021 | 26.633082 |
| C | 43.246797 | 4.907924 | 25.178439 | C  | 52.093702 | 4.666381 | 26.379749 |
| C | 44.645582 | 4.658165 | 25.235006 | C  | 49.466780 | 4.021882 | 22.293161 |
| C | 29.542183 | 3.747515 | 24.372604 | C  | 50.232747 | 2.940878 | 21.873109 |
| C | 44.330564 | 2.729810 | 23.794257 | C  | 50.321671 | 2.637891 | 20.519101 |
| C | 42.962925 | 2.947729 | 23.750917 | C  | 49.644629 | 3.416907 | 19.587145 |
| C | 42.396173 | 4.042885 | 24.440796 | C  | 48.879663 | 4.496911 | 20.007197 |
| O | 42.202354 | 2.034445 | 23.023916 | C  | 48.790739 | 4.799899 | 21.361205 |
| O | 32.146986 | 6.354778 | 25.936638 | C  | 48.023773 | 5.880903 | 21.783256 |
| O | 31.656777 | 4.197892 | 26.376588 | C  | 47.347732 | 6.658919 | 20.849300 |



|    |           |          |           |   |           |          |           |
|----|-----------|----------|-----------|---|-----------|----------|-----------|
| C  | 47.437657 | 6.354932 | 19.496292 | C | 23.691119 | 3.454209 | 42.105810 |
| C  | 48.203622 | 5.273928 | 19.075240 | C | 23.235106 | 4.173053 | 40.986264 |
| O  | 46.763615 | 7.184949 | 18.538336 | C | 21.848158 | 4.468278 | 40.869974 |
| O  | 49.733195 | 5.591140 | 24.088507 | C | 21.388102 | 5.128383 | 39.712077 |
| O  | 49.385647 | 3.425870 | 24.607665 | C | 22.283821 | 5.511533 | 38.717716 |
| C  | 49.525978 | 4.368703 | 23.749005 | C | 23.646310 | 5.253033 | 38.845693 |
| C  | 45.481723 | 5.534630 | 25.980018 | C | 24.132285 | 4.581006 | 39.971930 |
| C  | 44.915559 | 6.653086 | 26.619370 | O | 24.524198 | 5.629952 | 37.837637 |
| C  | 45.172911 | 3.568990 | 24.513839 | O | 19.146144 | 5.592303 | 41.622707 |
| O  | 47.717957 | 6.337989 | 25.883236 | O | 18.653728 | 3.442482 | 42.095423 |
| O  | 47.397075 | 4.170940 | 26.420145 | C | 19.498926 | 4.383211 | 41.871503 |
| C  | 46.951657 | 5.331587 | 26.096531 | C | 16.886269 | 4.115503 | 37.738444 |
| C  | 49.198164 | 5.992701 | 30.212298 | C | 17.590513 | 3.011020 | 37.227143 |
| C  | 50.141056 | 6.835013 | 30.828603 | C | 17.599833 | 2.741525 | 35.865521 |
| C  | 48.083189 | 5.523882 | 30.961457 | C | 16.904755 | 3.568972 | 34.990463 |
| C  | 47.057438 | 4.759497 | 30.365385 | C | 16.160232 | 4.670884 | 35.460868 |
| C  | 45.984579 | 4.304189 | 31.125311 | C | 16.129935 | 4.934273 | 36.855988 |
| O  | 49.608222 | 6.566437 | 27.935081 | C | 15.321806 | 5.985276 | 37.334378 |
| O  | 49.301423 | 4.391510 | 28.452934 | C | 14.607820 | 6.781657 | 36.448037 |
| C  | 49.388914 | 5.628686 | 28.783243 | C | 14.664590 | 6.564579 | 35.081445 |
| C  | 11.158284 | 7.260965 | 41.959133 | C | 15.447403 | 5.508349 | 34.562737 |
| C  | 10.287267 | 6.502972 | 41.186144 | O | 13.945899 | 7.443996 | 34.274501 |
| C  | 10.757252 | 5.394972 | 40.491132 | O | 17.238362 | 5.594750 | 39.570585 |
| C  | 12.099252 | 5.042967 | 40.571107 | O | 16.749430 | 3.438610 | 40.019711 |
| C  | 11.698220 | 3.178974 | 39.103108 | C | 16.964635 | 4.398196 | 39.195446 |
| C  | 10.356220 | 3.528979 | 39.024133 | C | 12.972269 | 5.800962 | 41.346096 |
| C  | 9.886236  | 4.637978 | 39.718145 | C | 12.500284 | 6.908961 | 42.040108 |
| O  | 9.453203  | 2.792985 | 38.218146 | C | 26.840309 | 7.283476 | 42.044395 |
| Cu | 17.237808 | 6.135646 | 41.480054 | C | 25.984161 | 6.405655 | 41.411632 |
| Cu | 16.684412 | 3.738845 | 41.985355 | C | 26.455842 | 5.215182 | 40.769998 |
| C  | 20.954842 | 4.056338 | 41.900202 | C | 27.870447 | 4.942756 | 40.839844 |
| C  | 21.454455 | 3.310901 | 42.984010 | C | 12.571236 | 3.934968 | 39.877095 |
| C  | 22.808564 | 3.017888 | 43.087851 | C | 27.532428 | 2.949528 | 39.487381 |

|    |           |          |           |   |           |          |           |
|----|-----------|----------|-----------|---|-----------|----------|-----------|
| C  | 26.134069 | 3.195060 | 39.433410 | O | 34.865399 | 5.562300 | 41.743651 |
| C  | 25.587180 | 4.309901 | 40.062990 | O | 34.327779 | 3.417485 | 42.158501 |
| O  | 25.449964 | 2.247676 | 38.725435 | C | 35.157385 | 4.340078 | 41.925204 |
| O  | 15.273980 | 6.431176 | 41.358584 | C | 32.580382 | 4.276861 | 37.889215 |
| O  | 14.773199 | 4.280387 | 41.811319 | C | 33.218538 | 3.132755 | 37.443278 |
| C  | 14.425278 | 5.479447 | 41.507302 | C | 33.242941 | 2.836970 | 36.064462 |
| C  | 16.704248 | 5.839495 | 45.706767 | C | 32.608393 | 3.664227 | 35.161538 |
| C  | 17.713574 | 6.603134 | 46.321448 | C | 31.900969 | 4.840463 | 35.573512 |
| C  | 18.796708 | 6.887805 | 32.224540 | C | 31.895049 | 5.148310 | 36.981530 |
| C  | 17.695473 | 6.450942 | 32.952307 | C | 31.158483 | 6.284794 | 37.427373 |
| C  | 16.664304 | 5.712263 | 32.340366 | C | 30.473093 | 7.069994 | 36.536350 |
| C  | 15.573968 | 5.432904 | 46.470112 | C | 30.491126 | 6.789491 | 35.142990 |
| C  | 14.486997 | 4.752308 | 45.881841 | C | 31.202325 | 5.698691 | 34.650509 |
| C  | 13.398884 | 4.359393 | 46.655347 | O | 29.775700 | 7.689224 | 34.405223 |
| C  | 14.503400 | 4.592247 | 32.438968 | O | 32.979622 | 5.744289 | 39.697555 |
| C  | 15.537051 | 5.284219 | 33.084245 | O | 32.386801 | 3.619415 | 40.147150 |
| O  | 13.390640 | 4.185588 | 33.166671 | C | 32.645363 | 4.571268 | 39.353750 |
| O  | 17.158502 | 6.438099 | 43.444577 | C | 28.728958 | 5.861280 | 41.530202 |
| O  | 16.645369 | 4.287845 | 43.894519 | C | 28.226213 | 7.022146 | 42.093253 |
| C  | 16.847899 | 5.500516 | 44.264085 | C | 42.250192 | 7.224182 | 41.986380 |
| Cu | 33.006899 | 6.341943 | 41.579173 | C | 41.431585 | 6.392637 | 41.229616 |
| Cu | 32.414230 | 3.864922 | 42.113982 | C | 41.965323 | 5.313138 | 40.499874 |
| C  | 36.608440 | 3.968295 | 41.870959 | C | 43.367691 | 5.072704 | 40.551023 |
| C  | 37.158012 | 3.257754 | 42.921841 | C | 28.373914 | 3.790086 | 40.168710 |
| C  | 38.546110 | 2.988417 | 42.934285 | C | 43.077692 | 3.244283 | 38.983459 |
| C  | 39.360660 | 3.433796 | 41.912879 | C | 41.705946 | 3.436124 | 38.963899 |
| C  | 38.836037 | 4.151246 | 40.789221 | C | 41.127987 | 4.476547 | 39.719760 |
| C  | 37.413178 | 4.377237 | 40.760731 | O | 40.956260 | 2.545593 | 38.199895 |
| C  | 36.841024 | 4.964672 | 39.600459 | O | 30.996918 | 6.541087 | 41.470341 |
| C  | 37.630832 | 5.397324 | 38.567845 | O | 30.529294 | 4.420533 | 42.052320 |
| C  | 39.046241 | 5.313528 | 38.649823 | C | 30.194083 | 5.589087 | 41.687618 |
| C  | 39.655709 | 4.653749 | 39.718335 | C | 32.364171 | 5.966691 | 45.770634 |
| O  | 39.794568 | 5.876196 | 37.662785 | C | 33.249450 | 6.847702 | 46.365644 |

|    |           |          |           |   |           |          |           |
|----|-----------|----------|-----------|---|-----------|----------|-----------|
| C  | 34.613168 | 6.770701 | 32.256354 | C | 47.488553 | 5.153960 | 36.884307 |
| C  | 33.497968 | 6.423021 | 33.010168 | C | 46.606789 | 6.155753 | 37.336462 |
| C  | 32.406083 | 5.752509 | 32.428043 | C | 45.846620 | 6.883524 | 36.429689 |
| C  | 31.261103 | 5.419766 | 46.505622 | C | 45.928103 | 6.644244 | 35.067793 |
| C  | 30.270937 | 4.594868 | 45.897572 | C | 46.788283 | 5.637145 | 34.574387 |
| C  | 29.217991 | 4.101033 | 46.628941 | O | 45.156225 | 7.455773 | 34.239135 |
| C  | 30.171078 | 4.803344 | 32.578023 | O | 48.493250 | 5.887592 | 39.638017 |
| C  | 31.262432 | 5.426002 | 33.193781 | O | 48.107636 | 3.705904 | 40.061992 |
| O  | 29.034754 | 4.513248 | 33.321919 | C | 48.296408 | 4.680149 | 39.248806 |
| O  | 32.901819 | 6.550063 | 43.553654 | C | 44.193699 | 5.894552 | 41.368423 |
| O  | 32.465768 | 4.390801 | 44.009439 | C | 43.616082 | 6.978820 | 42.054942 |
| C  | 32.592355 | 5.606228 | 44.336072 | C | 43.909741 | 4.042631 | 39.759405 |
| Cu | 48.441492 | 6.410283 | 41.555429 | O | 46.465041 | 6.633558 | 41.416382 |
| Cu | 47.983589 | 3.986829 | 42.027227 | O | 46.053329 | 4.452407 | 41.812406 |
| C  | 52.242277 | 4.464616 | 41.931345 | C | 45.656818 | 5.643657 | 41.537853 |
| C  | 52.828352 | 3.947593 | 43.079296 | C | 47.841397 | 6.059776 | 45.765586 |
| C  | 54.201352 | 3.732573 | 43.123194 | C | 48.796637 | 6.875418 | 46.400278 |
| C  | 54.987277 | 4.036578 | 42.018142 | C | 50.024141 | 7.174525 | 32.170322 |
| C  | 54.401202 | 4.554601 | 40.869191 | C | 48.959698 | 6.684641 | 32.919352 |
| C  | 53.028202 | 4.768621 | 40.826292 | C | 47.977994 | 5.859687 | 32.337149 |
| C  | 52.442128 | 5.287645 | 39.677341 | C | 46.721866 | 5.589397 | 46.507984 |
| C  | 53.229054 | 5.591649 | 38.571289 | C | 45.679875 | 4.859026 | 45.898336 |
| C  | 54.601054 | 5.377629 | 38.616189 | C | 44.606280 | 4.397314 | 46.654077 |
| C  | 55.187129 | 4.858606 | 39.764139 | C | 45.903673 | 4.591181 | 32.485508 |
| O  | 55.314970 | 5.617636 | 37.405141 | C | 46.887642 | 5.376318 | 33.101937 |
| O  | 50.368889 | 5.936445 | 41.720767 | O | 44.828638 | 4.125626 | 33.233986 |
| O  | 49.963060 | 3.764091 | 42.174383 | O | 48.322276 | 6.691552 | 43.519442 |
| C  | 50.770443 | 4.738257 | 41.954811 | O | 47.880566 | 4.519787 | 43.940463 |
| C  | 48.282612 | 4.397755 | 37.789090 | C | 48.028912 | 5.736299 | 44.324129 |
| C  | 49.078682 | 3.346279 | 37.300537 | C | 9.830844  | 7.260885 | 57.522289 |
| C  | 49.130582 | 3.063750 | 35.942596 | C | 8.959813  | 6.502896 | 56.749314 |
| C  | 48.385586 | 3.823352 | 35.047831 | C | 9.429780  | 5.394897 | 56.054290 |
| C  | 47.554588 | 4.872504 | 35.493295 | C | 10.771780 | 5.042887 | 56.134240 |

|    |           |          |           |    |           |          |           |
|----|-----------|----------|-----------|----|-----------|----------|-----------|
| C  | 10.370715 | 3.178901 | 54.666241 | C  | 15.685016 | 4.463099 | 54.789124 |
| C  | 9.028715  | 3.528910 | 54.587291 | C  | 11.644813 | 5.800876 | 56.909215 |
| C  | 8.558747  | 4.637908 | 55.281315 | C  | 11.172845 | 6.908875 | 57.603239 |
| O  | 8.125681  | 2.792922 | 53.781316 | C  | 25.311261 | 7.039098 | 57.578001 |
| Cu | 15.895645 | 6.132391 | 57.134124 | C  | 24.476974 | 6.213052 | 56.834169 |
| Cu | 15.338916 | 3.719960 | 57.552937 | C  | 24.987570 | 5.109013 | 56.120612 |
| C  | 19.593741 | 4.027163 | 57.441415 | C  | 26.382457 | 4.841102 | 56.173241 |
| C  | 20.142857 | 3.263206 | 58.486909 | C  | 11.243748 | 3.934890 | 55.440215 |
| C  | 21.494244 | 2.942049 | 58.501710 | C  | 26.056407 | 2.990375 | 54.635927 |
| C  | 22.320469 | 3.369996 | 57.467941 | C  | 24.689758 | 3.214383 | 54.608860 |
| C  | 21.808916 | 4.113833 | 56.387270 | C  | 24.129593 | 4.276520 | 55.354178 |
| C  | 20.425231 | 4.433626 | 56.360647 | O  | 23.923312 | 2.336376 | 53.845419 |
| C  | 19.904368 | 5.116817 | 55.241202 | O  | 13.940655 | 6.429316 | 56.972026 |
| C  | 20.741325 | 5.505655 | 54.199953 | O  | 13.433461 | 4.268986 | 57.371170 |
| C  | 22.106073 | 5.231898 | 54.243579 | C  | 13.091660 | 5.473969 | 57.085286 |
| C  | 22.651839 | 4.528424 | 55.326177 | C  | 15.283042 | 5.695809 | 61.352094 |
| O  | 22.930656 | 5.628281 | 53.196737 | C  | 16.314083 | 6.385792 | 61.978046 |
| O  | 17.797050 | 5.585629 | 57.300597 | C  | 17.645225 | 6.924145 | 47.670710 |
| O  | 17.301622 | 3.415556 | 57.672104 | C  | 16.563271 | 6.495405 | 48.431241 |
| C  | 18.145513 | 4.363826 | 57.483638 | C  | 15.516445 | 5.751972 | 47.853588 |
| C  | 15.672731 | 4.209178 | 53.323015 | C  | 14.198077 | 5.242813 | 62.095147 |
| C  | 16.386229 | 3.101758 | 52.829704 | C  | 13.166036 | 4.552830 | 61.469195 |
| C  | 16.439074 | 2.836118 | 51.468537 | C  | 12.083071 | 4.099834 | 62.213248 |
| C  | 15.774372 | 3.666853 | 50.574100 | C  | 13.360139 | 4.632120 | 48.020508 |
| C  | 15.024817 | 4.774001 | 51.022524 | C  | 14.405651 | 5.338934 | 48.630006 |
| C  | 14.960921 | 5.042663 | 52.416847 | O  | 12.265172 | 4.235497 | 48.780228 |
| C  | 14.158569 | 6.109023 | 52.869363 | O  | 15.761175 | 6.375298 | 59.107652 |
| C  | 13.479543 | 6.911573 | 51.961022 | O  | 15.277540 | 4.204198 | 59.478520 |
| C  | 13.559740 | 6.681026 | 50.597615 | C  | 15.447082 | 5.408104 | 59.892374 |
| C  | 14.334198 | 5.607243 | 50.103282 | Cu | 31.471375 | 6.100115 | 57.130494 |
| O  | 12.867105 | 7.561255 | 49.768861 | Cu | 30.964506 | 3.680786 | 57.576407 |
| O  | 15.948617 | 5.648566 | 55.206299 | C  | 35.210356 | 4.044504 | 57.454435 |
| O  | 15.434913 | 3.484158 | 55.580188 | C  | 35.754718 | 3.315823 | 58.527771 |

|   |           |          |           |    |           |          |           |
|---|-----------|----------|-----------|----|-----------|----------|-----------|
| C | 37.102785 | 2.983307 | 58.554737 | C  | 41.690858 | 2.913792 | 54.654345 |
| C | 37.931628 | 3.363763 | 57.505410 | C  | 40.322516 | 3.129433 | 54.624558 |
| C | 37.426851 | 4.073879 | 56.399334 | C  | 39.753801 | 4.188397 | 55.368277 |
| C | 36.045834 | 4.407209 | 56.361592 | O  | 39.563021 | 2.244466 | 53.862286 |
| C | 35.531662 | 5.057387 | 55.220480 | O  | 29.502455 | 6.364669 | 57.012089 |
| C | 36.372552 | 5.399156 | 54.165498 | O  | 29.050641 | 4.189855 | 57.403000 |
| C | 37.735076 | 5.113496 | 54.218938 | C  | 28.677574 | 5.389243 | 57.136867 |
| C | 38.274963 | 4.442976 | 55.325477 | C  | 30.903116 | 5.695628 | 61.351271 |
| O | 38.563625 | 5.466898 | 53.160032 | C  | 31.934171 | 6.385605 | 61.977208 |
| O | 33.389592 | 5.580204 | 57.265984 | C  | 33.110934 | 7.174802 | 47.732253 |
| O | 32.929190 | 3.411891 | 57.689080 | C  | 32.084109 | 6.636853 | 48.478216 |
| C | 33.757852 | 4.367767 | 57.477820 | C  | 31.116629 | 5.750869 | 47.900836 |
| C | 31.274785 | 4.130979 | 53.341351 | C  | 29.818163 | 5.242633 | 62.094342 |
| C | 32.056319 | 3.064878 | 52.861120 | C  | 28.786109 | 4.552656 | 61.468406 |
| C | 32.141577 | 2.799186 | 51.501473 | C  | 27.703155 | 4.099663 | 62.212477 |
| C | 31.440926 | 3.587605 | 50.595907 | C  | 29.094658 | 4.379076 | 48.016573 |
| C | 30.620485 | 4.647128 | 51.032097 | C  | 30.024932 | 5.198816 | 48.652550 |
| C | 30.525940 | 4.917633 | 52.423876 | O  | 28.059697 | 3.848787 | 48.724685 |
| C | 29.664051 | 5.942532 | 52.861867 | O  | 31.370698 | 6.358423 | 59.101964 |
| C | 28.953581 | 6.702335 | 51.939441 | O  | 30.907404 | 4.186411 | 59.495455 |
| C | 29.062611 | 6.469476 | 50.578636 | C  | 31.068824 | 5.395903 | 59.896207 |
| C | 29.894509 | 5.435150 | 50.106647 | Cu | 47.051586 | 6.250040 | 57.150987 |
| O | 28.342829 | 7.308749 | 49.732626 | Cu | 46.688727 | 3.793537 | 57.533597 |
| O | 31.496897 | 5.601595 | 55.205187 | C  | 50.914826 | 4.464382 | 57.493755 |
| O | 31.055455 | 3.425799 | 55.606046 | C  | 51.500920 | 3.947352 | 58.641694 |
| C | 31.272352 | 4.403033 | 54.803475 | C  | 52.873920 | 3.732327 | 58.685568 |
| C | 27.223168 | 5.663262 | 56.973573 | C  | 53.659827 | 4.036331 | 57.580503 |
| C | 26.670812 | 6.768571 | 57.646289 | C  | 53.073733 | 4.554362 | 56.431564 |
| C | 40.909118 | 6.941376 | 57.615612 | C  | 51.700733 | 4.768387 | 56.388690 |
| C | 40.084629 | 6.115358 | 56.863070 | C  | 51.114640 | 5.287417 | 55.239751 |
| C | 40.605708 | 5.021092 | 56.141787 | C  | 51.901547 | 5.591423 | 54.133687 |
| C | 42.004179 | 4.765710 | 56.191814 | C  | 53.273547 | 5.377397 | 54.178561 |
| C | 26.902858 | 3.785480 | 55.398495 | C  | 53.859639 | 4.858367 | 55.326499 |

|   |           |          |           |   |           |          |           |
|---|-----------|----------|-----------|---|-----------|----------|-----------|
| O | 53.987443 | 5.617405 | 52.967501 | C | 45.535750 | 5.405013 | 48.652476 |
| O | 48.992008 | 5.859470 | 57.302818 | O | 43.465996 | 4.170756 | 48.766837 |
| O | 48.673727 | 3.654845 | 57.669077 | O | 46.919693 | 6.443394 | 59.123893 |
| C | 49.438558 | 4.672408 | 57.498548 | O | 46.574958 | 4.238585 | 59.462106 |
| C | 46.969302 | 4.364735 | 53.316790 | C | 46.675347 | 5.443513 | 59.891150 |
| C | 47.787874 | 3.342181 | 52.804565 | C | 16.262158 | 6.620778 | 63.347051 |
| C | 47.843861 | 3.089791 | 51.441393 | C | 15.179191 | 6.168782 | 64.090104 |
| C | 47.078998 | 3.849995 | 50.564346 | C | 14.147152 | 5.478800 | 63.465152 |
| C | 46.227749 | 4.872800 | 51.032652 | C | 12.031146 | 4.336820 | 63.582253 |
| C | 46.159843 | 5.124982 | 52.429454 | C | 13.063187 | 5.025805 | 64.207205 |
| C | 45.260056 | 6.099982 | 52.903780 | O | 10.943183 | 3.908824 | 64.361306 |
| C | 44.486972 | 6.833961 | 52.013336 | C | 31.882271 | 6.620587 | 63.346214 |
| C | 44.568495 | 6.623172 | 50.646869 | C | 30.799317 | 6.168593 | 64.089284 |
| C | 45.442835 | 5.639421 | 50.130762 | C | 29.767262 | 5.478616 | 63.464348 |
| O | 43.782698 | 7.440551 | 49.837170 | C | 27.651255 | 4.336645 | 63.581483 |
| O | 47.125699 | 5.801179 | 55.215525 | C | 28.683309 | 5.025622 | 64.206418 |
| O | 46.815183 | 3.593541 | 55.561816 | O | 26.563304 | 3.908650 | 64.360554 |
| C | 46.969647 | 4.601749 | 54.784134 | C | 47.502385 | 6.620342 | 63.345096 |
| C | 42.838195 | 5.597870 | 56.988961 | C | 46.419443 | 6.168348 | 64.088184 |
| C | 42.270981 | 6.687414 | 57.676311 | C | 45.387375 | 5.478376 | 63.463264 |
| C | 42.532522 | 3.716595 | 55.414748 | C | 43.271365 | 4.336411 | 63.580432 |
| O | 45.077332 | 6.397597 | 57.020866 | C | 44.303433 | 5.025383 | 64.205353 |
| O | 44.743757 | 4.191706 | 57.350772 | O | 42.183428 | 3.908416 | 64.359522 |
| C | 44.305767 | 5.377758 | 57.120951 | H | 12.119252 | 8.127090 | 26.935733 |
| C | 46.523192 | 5.695393 | 61.350166 | H | 10.573040 | 6.786843 | 25.566353 |
| C | 47.554258 | 6.385364 | 61.976087 | H | 13.383774 | 2.323382 | 22.982327 |
| C | 48.688304 | 7.186235 | 47.749091 | H | 9.847486  | 3.169741 | 22.676924 |
| C | 47.620892 | 6.692848 | 48.489925 | H | 22.122524 | 2.849730 | 28.236932 |
| C | 46.627533 | 5.893200 | 47.892736 | H | 24.519085 | 2.297386 | 28.278066 |
| C | 45.438249 | 5.242399 | 62.093255 | H | 25.995015 | 3.052043 | 26.484767 |
| C | 44.406182 | 4.552428 | 61.467335 | H | 21.477422 | 5.221199 | 24.048160 |
| C | 43.323240 | 4.099435 | 62.211424 | H | 22.959786 | 5.909982 | 22.270101 |
| C | 44.540039 | 4.645668 | 48.022819 | H | 19.532097 | 2.329493 | 22.589889 |

|   |           |          |           |   |           |          |           |
|---|-----------|----------|-----------|---|-----------|----------|-----------|
| H | 19.679348 | 1.794080 | 20.190520 | H | 31.292289 | 6.861218 | 17.596351 |
| H | 18.480483 | 3.170803 | 18.536736 | H | 40.789737 | 5.827744 | 21.471992 |
| H | 16.651495 | 6.145383 | 22.827126 | H | 41.219494 | 2.248488 | 23.029848 |
| H | 15.506921 | 7.501017 | 21.165194 | H | 53.551978 | 3.700079 | 28.381241 |
| H | 14.495576 | 7.508130 | 27.087612 | H | 55.987708 | 3.326145 | 28.455755 |
| H | 27.525279 | 7.933278 | 26.946725 | H | 57.384060 | 3.866333 | 26.497859 |
| H | 26.051702 | 6.439018 | 25.707250 | H | 52.703461 | 5.452019 | 24.014190 |
| H | 14.941535 | 3.634123 | 24.311218 | H | 54.081068 | 5.975951 | 22.116790 |
| H | 29.108653 | 2.089057 | 23.084409 | H | 50.777604 | 2.335082 | 22.589415 |
| H | 19.772357 | 6.914830 | 30.323665 | H | 50.920920 | 1.795284 | 20.189774 |
| H | 15.671536 | 4.535641 | 29.265929 | H | 49.720355 | 3.170948 | 18.535941 |
| H | 13.761618 | 3.833567 | 30.568862 | H | 47.863169 | 6.134688 | 22.823873 |
| H | 15.672066 | 6.861242 | 17.596385 | H | 46.741200 | 7.496820 | 21.164933 |
| H | 25.082245 | 6.055773 | 21.435046 | H | 45.546056 | 7.340322 | 27.172211 |
| H | 25.585185 | 2.442927 | 22.887539 | H | 46.234978 | 3.353973 | 24.482981 |
| H | 37.676868 | 2.912531 | 28.333288 | H | 50.979512 | 7.219106 | 30.258730 |
| H | 40.058520 | 2.312459 | 28.425488 | H | 47.060389 | 4.512697 | 29.309092 |
| H | 41.569253 | 2.961096 | 26.620924 | H | 45.212761 | 3.716850 | 30.646544 |
| H | 37.136461 | 5.183844 | 24.076370 | H | 46.912914 | 6.861743 | 17.595811 |
| H | 38.655580 | 5.768205 | 22.287918 | H | 56.056148 | 5.977148 | 21.104161 |
| H | 35.148141 | 2.327644 | 22.590747 | H | 10.790930 | 8.128028 | 42.498493 |
| H | 35.298438 | 1.793462 | 20.190382 | H | 9.244464  | 6.787120 | 41.129909 |
| H | 34.099971 | 3.170596 | 18.536513 | H | 12.055536 | 2.325174 | 38.543890 |
| H | 32.263757 | 6.143629 | 22.825814 | H | 8.519524  | 3.171537 | 38.239162 |
| H | 31.124714 | 7.499464 | 21.165138 | H | 20.782217 | 2.969571 | 43.763376 |
| H | 29.935512 | 7.474321 | 27.088164 | H | 23.178397 | 2.452057 | 43.937308 |
| H | 43.130010 | 7.759417 | 27.064750 | H | 24.740155 | 3.211994 | 42.221109 |
| H | 41.668792 | 6.257376 | 25.827433 | H | 20.336247 | 5.341268 | 39.549184 |
| H | 30.604603 | 3.537057 | 24.326898 | H | 21.906071 | 6.014112 | 37.837351 |
| H | 44.742274 | 1.890784 | 23.249610 | H | 18.146402 | 2.363963 | 37.896009 |
| H | 35.544522 | 6.722433 | 30.334068 | H | 18.153845 | 1.889683 | 35.483994 |
| H | 31.299690 | 4.565577 | 29.394678 | H | 16.938052 | 3.327969 | 33.937487 |
| H | 29.356685 | 4.043777 | 30.737576 | H | 15.216573 | 6.200774 | 38.391635 |

|   |           |          |           |   |           |          |           |
|---|-----------|----------|-----------|---|-----------|----------|-----------|
| H | 13.995061 | 7.590421 | 36.823076 | H | 30.338966 | 4.354124 | 44.836360 |
| H | 13.169420 | 7.511204 | 42.645486 | H | 28.462622 | 3.474984 | 46.139173 |
| H | 26.441480 | 8.189006 | 42.512754 | H | 28.340251 | 4.013099 | 32.786040 |
| H | 24.915626 | 6.644360 | 41.397851 | H | 29.727509 | 7.450269 | 33.466694 |
| H | 13.612093 | 3.634333 | 39.867546 | H | 39.222214 | 6.451749 | 37.125058 |
| H | 27.914902 | 2.071887 | 38.959670 | H | 39.963697 | 2.719751 | 38.240064 |
| H | 18.566480 | 6.940683 | 45.743335 | H | 52.223438 | 3.710469 | 43.947444 |
| H | 19.574911 | 7.467138 | 32.711428 | H | 54.659353 | 3.328256 | 44.019942 |
| H | 17.647180 | 6.709005 | 34.001552 | H | 56.055400 | 3.866636 | 42.061220 |
| H | 14.453123 | 4.525700 | 44.821530 | H | 51.374751 | 5.452183 | 39.578203 |
| H | 12.580038 | 3.834442 | 46.182435 | H | 52.752203 | 5.975600 | 37.680019 |
| H | 12.732622 | 3.667480 | 32.603876 | H | 49.669831 | 2.748617 | 37.985061 |
| H | 14.000759 | 7.215023 | 33.296770 | H | 49.752621 | 2.251602 | 35.579756 |
| H | 24.065422 | 6.134906 | 37.093671 | H | 48.450269 | 3.570554 | 33.999099 |
| H | 24.499282 | 2.431423 | 38.669869 | H | 46.480087 | 6.384885 | 38.388419 |
| H | 36.517684 | 2.927095 | 43.744176 | H | 45.173958 | 7.652710 | 36.784868 |
| H | 38.979901 | 2.430370 | 43.770206 | H | 44.236329 | 7.630248 | 42.660283 |
| H | 40.433479 | 3.223156 | 41.966853 | H | 44.975813 | 3.846026 | 39.716233 |
| H | 35.761220 | 5.102847 | 39.527682 | H | 49.637952 | 7.263842 | 45.837477 |
| H | 37.171791 | 5.863455 | 37.690771 | H | 50.764434 | 7.818395 | 32.634617 |
| H | 33.711370 | 2.476330 | 38.164957 | H | 48.900243 | 6.967727 | 33.961580 |
| H | 33.765964 | 1.943489 | 35.709255 | H | 45.669634 | 4.645689 | 44.834900 |
| H | 32.644909 | 3.392287 | 34.101774 | H | 43.821190 | 3.836766 | 46.164967 |
| H | 31.127296 | 6.529344 | 38.490208 | H | 44.204219 | 3.547074 | 32.692046 |
| H | 29.890012 | 7.931560 | 36.872465 | H | 45.237817 | 7.215666 | 33.265942 |
| H | 28.907180 | 7.719167 | 42.588655 | H | 54.726458 | 5.972420 | 36.665853 |
| H | 41.821349 | 8.061305 | 42.528286 | H | 9.463360  | 8.127006 | 58.062982 |
| H | 40.372712 | 6.611900 | 41.202209 | H | 7.916941  | 6.786689 | 56.693566 |
| H | 29.442492 | 3.574205 | 40.188391 | H | 10.728176 | 2.325380 | 54.106699 |
| H | 43.501688 | 2.450337 | 38.382861 | H | 7.191621  | 3.170383 | 53.803725 |
| H | 34.063229 | 7.270539 | 45.770655 | H | 19.511500 | 2.924663 | 59.300577 |
| H | 35.440106 | 7.297791 | 32.722237 | H | 21.905284 | 2.358931 | 59.319744 |
| H | 33.489557 | 6.697202 | 34.057451 | H | 23.367526 | 3.102139 | 57.511310 |



|                                |                                |
|--------------------------------|--------------------------------|
| H 18.849099 5.349710 55.146582 | H 39.030539 6.350917 56.836625 |
| H 20.318622 6.029976 53.353632 | H 27.963581 3.566193 55.354965 |
| H 16.912771 2.445924 53.513711 | H 42.104104 2.105649 54.065855 |
| H 16.999208 1.981229 51.102954 | H 32.788964 6.737424 61.409690 |
| H 15.837471 3.425518 49.522577 | H 33.826480 7.856815 48.202526 |
| H 14.031272 6.332745 53.922436 | H 32.007450 6.908242 49.535806 |
| H 12.871130 7.732381 52.316358 | H 28.748371 4.376085 60.399705 |
| H 11.840599 7.509022 58.212429 | H 26.897578 3.574785 61.718349 |
| H 24.899359 7.891635 58.108725 | H 27.517369 3.288720 48.145926 |
| H 23.424400 6.456389 56.806062 | H 28.462973 7.088191 48.755710 |
| H 12.285087 3.636260 55.426932 | H 38.072009 5.973122 52.438768 |
| H 26.463921 2.179547 54.047080 | H 38.581141 2.461514 53.869338 |
| H 17.168444 6.739050 61.410671 | H 50.894970 3.700094 59.506373 |
| H 18.436933 7.506766 48.131301 | H 53.331570 3.325517 59.581306 |
| H 16.543343 6.761693 49.479359 | H 54.727839 3.865721 57.623142 |
| H 13.128566 4.376335 60.400533 | H 50.047618 5.459615 55.145580 |
| H 11.277757 3.574562 61.719224 | H 51.424868 5.977059 53.243037 |
| H 11.593312 3.711115 48.240226 | H 48.390744 2.741086 53.475892 |
| H 12.958261 7.337255 48.792546 | H 48.482924 2.299133 51.061245 |
| H 22.432852 6.152348 52.492650 | H 47.145705 3.618819 49.510958 |
| H 22.942636 2.559177 53.855066 | H 45.128858 6.303469 53.960548 |
| H 35.120207 3.008213 59.351237 | H 43.802783 7.584683 52.385603 |
| H 37.508407 2.425201 59.392639 | H 42.899112 7.342283 58.269660 |
| H 38.975533 3.085611 57.557402 | H 43.595040 3.507334 55.368340 |
| H 34.479040 5.301046 55.121334 | H 48.405704 6.744514 61.407923 |
| H 35.955391 5.897587 53.301005 | H 49.437593 7.810829 48.225131 |
| H 32.614859 2.445131 53.553613 | H 47.568867 6.953351 49.538348 |
| H 32.757117 1.978914 51.145565 | H 44.381641 4.364054 60.399410 |
| H 31.533974 3.349525 49.544602 | H 42.519372 3.571558 61.717697 |
| H 29.517627 6.166525 53.913280 | H 42.838418 3.602761 48.217489 |
| H 28.299367 7.492823 52.283088 | H 43.870941 7.227318 48.858495 |
| H 27.305750 7.416137 58.240199 | H 53.398644 5.970533 52.227582 |
| H 40.488936 7.784705 58.154427 | H 17.068304 7.157901 63.836040 |

|   |           |           |           |                                 |           |           |           |
|---|-----------|-----------|-----------|---------------------------------|-----------|-----------|-----------|
| H | 15.148106 | 6.357215  | 65.155558 | N                               | 36.646419 | 7.975368  | 40.850083 |
| H | 10.263187 | 3.421715  | 63.797072 | H                               | 33.424912 | 11.372976 | 39.851047 |
| H | 32.688463 | 7.157561  | 63.835223 | H                               | 34.973587 | 9.886519  | 40.958247 |
| H | 30.768039 | 6.357124  | 65.154696 | H                               | 34.385151 | 9.203722  | 43.298924 |
| H | 25.881974 | 3.423930  | 63.795755 | H                               | 30.872623 | 11.268178 | 40.373705 |
| H | 48.307538 | 7.159075  | 63.833774 | H                               | 31.914621 | 11.927645 | 41.647797 |
| H | 46.387782 | 6.357268  | 65.153495 | H                               | 30.225140 | 10.307008 | 42.574422 |
| H | 41.501340 | 3.424937  | 63.794467 | H                               | 30.912195 | 9.011103  | 41.573255 |
| H | 54.922538 | 4.682761  | 55.325772 | H                               | 32.325296 | 10.556153 | 43.837136 |
| H | 56.250071 | 4.683131  | 39.763677 | H                               | 31.909748 | 8.822423  | 43.813851 |
| H | 57.578875 | 4.683434  | 24.200636 | H                               | 32.627852 | 9.829813  | 39.512314 |
| H | 32.654315 | 5.043362  | 18.026547 | H                               | 38.665852 | 8.801899  | 39.283567 |
| H | 17.034831 | 5.043603  | 18.026692 | H                               | 38.562150 | 9.103423  | 36.826595 |
| H | 10.176567 | 4.915314  | 24.089625 | H                               | 36.450897 | 8.591910  | 35.570907 |
| H | 8.848003  | 4.915581  | 39.653302 | H                               | 34.427174 | 7.824886  | 36.852376 |
| H | 7.520566  | 4.915543  | 55.216449 | H                               | 34.529103 | 7.541210  | 39.295049 |
| H | 12.998935 | 5.198973  | 65.269012 | H                               | 35.979630 | 7.293304  | 41.218946 |
| H | 28.618777 | 5.198922  | 65.268152 | H                               | 37.577837 | 7.836505  | 41.233798 |
| H | 44.238638 | 5.198805  | 65.267027 |                                 |           |           |           |
| H | 48.273973 | 5.043176  | 18.026079 |                                 |           |           |           |
| C | 33.565426 | 9.365217  | 42.584987 | (S,S)-2-RC (open-shell singlet) |           |           |           |
| C | 33.910351 | 9.783152  | 41.205805 | C                               | 12.487000 | 7.261000  | 26.395000 |
| C | 32.913167 | 10.518689 | 40.329034 | C                               | 11.616000 | 6.503000  | 25.622000 |
| C | 31.665641 | 10.999859 | 41.094071 | C                               | 12.086000 | 5.395000  | 24.927000 |
| C | 31.155787 | 9.953578  | 42.094815 | C                               | 13.428000 | 5.043000  | 25.007000 |
| C | 32.209274 | 9.672947  | 43.178136 | C                               | 13.027000 | 3.179000  | 23.539000 |
| O | 33.575010 | 8.413976  | 41.512198 | C                               | 11.685000 | 3.529000  | 23.460000 |
| C | 36.599684 | 8.164971  | 39.474195 | C                               | 11.215000 | 4.638000  | 24.154000 |
| C | 37.727157 | 8.610236  | 38.752383 | O                               | 10.782000 | 2.793000  | 22.654000 |
| C | 37.669501 | 8.761189  | 37.363445 | Cu                              | 18.542576 | 6.080825  | 26.017802 |
| C | 36.490968 | 8.479299  | 36.658642 | Cu                              | 17.945099 | 3.693217  | 26.528078 |
| C | 35.360886 | 8.059194  | 37.375454 | C                               | 22.206563 | 3.934905  | 26.365668 |
| C | 35.406421 | 7.912026  | 38.761762 | C                               | 22.752900 | 3.166800  | 27.409614 |
|   |           |           |           | C                               | 24.105433 | 2.850222  | 27.429269 |

|   |           |          |           |    |           |          |           |
|---|-----------|----------|-----------|----|-----------|----------|-----------|
| C | 24.936180 | 3.290587 | 26.404182 | C  | 27.313764 | 3.148571 | 23.575410 |
| C | 24.426703 | 4.036360 | 25.323900 | C  | 26.750671 | 4.219142 | 24.305877 |
| C | 23.041061 | 4.344179 | 25.287802 | O  | 26.549920 | 2.257772 | 22.824095 |
| C | 22.521900 | 5.019388 | 24.162087 | O  | 16.596374 | 6.401214 | 25.851491 |
| C | 23.363804 | 5.423351 | 23.130870 | O  | 16.052124 | 4.262699 | 26.321198 |
| C | 24.731248 | 5.168892 | 23.188417 | C  | 15.734822 | 5.460957 | 25.985889 |
| C | 25.273616 | 4.464731 | 24.271941 | C  | 17.918655 | 5.810725 | 30.232771 |
| O | 25.561701 | 5.581686 | 22.152384 | C  | 18.906584 | 6.585305 | 30.867954 |
| O | 20.431599 | 5.510017 | 26.191201 | C  | 16.778688 | 5.388255 | 30.972783 |
| O | 19.905956 | 3.363378 | 26.646924 | C  | 15.706726 | 4.703912 | 30.360690 |
| C | 20.762829 | 4.290664 | 26.413792 | C  | 14.614465 | 4.285066 | 31.114500 |
| C | 18.226927 | 4.022014 | 22.293999 | O  | 18.430344 | 6.396284 | 27.978421 |
| C | 18.992915 | 2.941012 | 21.873981 | O  | 17.896443 | 4.251251 | 28.430776 |
| C | 19.081890 | 2.638017 | 20.519979 | C  | 18.097238 | 5.465005 | 28.796517 |
| C | 18.404876 | 3.417024 | 19.587993 | Cu | 34.094490 | 6.015710 | 26.078757 |
| C | 17.639888 | 4.497025 | 20.008011 | Cu | 33.535723 | 3.611445 | 26.544625 |
| C | 17.550913 | 4.800019 | 21.362013 | C  | 37.792676 | 3.899047 | 26.434983 |
| C | 16.783924 | 5.881020 | 21.784030 | C  | 38.308365 | 3.149347 | 27.508045 |
| C | 16.107910 | 6.659026 | 20.850045 | C  | 39.654595 | 2.812850 | 27.562971 |
| C | 16.197885 | 6.355032 | 19.497042 | C  | 40.511346 | 3.213009 | 26.543591 |
| C | 16.963876 | 5.274031 | 19.076025 | C  | 40.035272 | 3.941692 | 25.437182 |
| O | 15.523872 | 7.185038 | 18.539057 | C  | 38.655711 | 4.276031 | 25.368585 |
| O | 18.564663 | 5.526681 | 24.113588 | C  | 38.171145 | 4.941804 | 24.223266 |
| O | 18.015335 | 3.386585 | 24.572712 | C  | 39.039728 | 5.301990 | 23.197262 |
| C | 18.262144 | 4.334762 | 23.745633 | C  | 40.400328 | 5.015520 | 23.282308 |
| C | 14.301000 | 5.801000 | 25.782000 | C  | 40.910097 | 4.326155 | 24.391234 |
| C | 13.829000 | 6.909000 | 26.476000 | O  | 41.256914 | 5.386694 | 22.251760 |
| C | 27.921566 | 7.012391 | 26.498572 | O  | 35.999960 | 5.460735 | 26.212850 |
| C | 27.089338 | 6.172780 | 25.766690 | O  | 35.496962 | 3.306939 | 26.659072 |
| C | 27.604650 | 5.066095 | 25.060447 | C  | 36.344789 | 4.244723 | 26.440009 |
| C | 29.000576 | 4.807784 | 25.111002 | C  | 33.846855 | 4.021974 | 22.293721 |
| C | 13.900000 | 3.935000 | 24.313000 | C  | 34.612832 | 2.940971 | 21.873686 |
| C | 28.681315 | 2.933019 | 23.600603 | C  | 34.701783 | 2.637980 | 20.519681 |

|   |           |          |           |    |           |          |           |
|---|-----------|----------|-----------|----|-----------|----------|-----------|
| C | 34.024755 | 3.416991 | 19.587710 | Cu | 49.696102 | 6.210740 | 25.980077 |
| C | 33.259777 | 4.496993 | 20.007743 | Cu | 49.343786 | 3.794683 | 26.566409 |
| C | 33.170827 | 4.799985 | 21.361749 | C  | 53.571004 | 4.464799 | 26.367945 |
| C | 32.403849 | 5.880988 | 21.783783 | C  | 54.157059 | 3.947781 | 27.515908 |
| C | 31.727822 | 6.658998 | 20.849812 | C  | 55.530060 | 3.732767 | 27.559832 |
| C | 31.817772 | 6.355006 | 19.496807 | C  | 56.316003 | 4.036770 | 26.454793 |
| C | 32.583750 | 5.274004 | 19.075773 | C  | 55.729947 | 4.554788 | 25.305829 |
| O | 31.143744 | 7.185017 | 18.538837 | C  | 54.356948 | 4.768802 | 25.262905 |
| O | 34.106902 | 5.506807 | 24.155838 | C  | 53.770890 | 5.287820 | 24.113942 |
| O | 33.614619 | 3.346356 | 24.572637 | C  | 54.557834 | 5.591822 | 23.007903 |
| C | 33.847238 | 4.313122 | 23.760070 | C  | 55.929834 | 5.377808 | 23.052827 |
| C | 29.838009 | 5.640847 | 25.903405 | C  | 56.515890 | 4.858790 | 24.200790 |
| C | 29.283253 | 6.751079 | 26.564877 | O  | 56.643771 | 5.617813 | 21.841791 |
| C | 43.546476 | 6.890983 | 26.604238 | O  | 51.638280 | 5.839790 | 26.119416 |
| C | 42.717612 | 6.032266 | 25.893306 | O  | 51.333704 | 3.664668 | 26.637593 |
| C | 43.237834 | 4.918633 | 25.202069 | C  | 52.092935 | 4.668980 | 26.380430 |
| C | 44.637796 | 4.671944 | 25.246811 | C  | 49.466780 | 4.021882 | 22.293161 |
| C | 29.525381 | 3.746706 | 24.345791 | C  | 50.232747 | 2.940878 | 21.873109 |
| C | 44.318159 | 2.757867 | 23.788467 | C  | 50.321671 | 2.637891 | 20.519101 |
| C | 42.949668 | 2.972703 | 23.756267 | C  | 49.644629 | 3.416907 | 19.587145 |
| C | 42.384598 | 4.059546 | 24.460482 | C  | 48.879663 | 4.496911 | 20.007197 |
| O | 42.186625 | 2.065479 | 23.024203 | C  | 48.790739 | 4.799899 | 21.361205 |
| O | 32.127755 | 6.316508 | 25.962741 | C  | 48.023773 | 5.880903 | 21.783256 |
| O | 31.636684 | 4.152659 | 26.367243 | C  | 47.347732 | 6.658919 | 20.849300 |
| C | 31.286423 | 5.354432 | 26.086311 | C  | 47.437657 | 6.354932 | 19.496292 |
| C | 33.590833 | 5.643056 | 30.305914 | C  | 48.203622 | 5.273928 | 19.075240 |
| C | 34.660839 | 6.300466 | 30.939372 | O  | 46.763615 | 7.184949 | 18.538336 |
| C | 32.431391 | 5.310025 | 31.060519 | O  | 49.730566 | 5.592635 | 24.088214 |
| C | 31.295600 | 4.733869 | 30.455570 | O  | 49.383898 | 3.428217 | 24.610425 |
| C | 30.168357 | 4.435810 | 31.217135 | C  | 49.524728 | 4.369645 | 23.749918 |
| O | 34.017729 | 6.282843 | 28.050077 | C  | 45.477220 | 5.542712 | 25.994793 |
| O | 33.484190 | 4.129740 | 28.464659 | C  | 44.912359 | 6.652392 | 26.650480 |
| C | 33.706752 | 5.332532 | 28.854674 | C  | 45.163129 | 3.591612 | 24.511351 |

|    |           |          |           |   |           |          |           |
|----|-----------|----------|-----------|---|-----------|----------|-----------|
| O  | 47.715142 | 6.344552 | 25.885775 | O | 18.650582 | 3.471741 | 42.173896 |
| O  | 47.393991 | 4.177747 | 26.423280 | C | 19.495624 | 4.416543 | 41.970249 |
| C  | 46.948294 | 5.338975 | 26.102311 | C | 16.953145 | 4.132003 | 37.776344 |
| C  | 49.204379 | 6.011119 | 30.213460 | C | 17.679523 | 3.039055 | 37.271457 |
| C  | 50.150596 | 6.854204 | 30.823900 | C | 17.700655 | 2.766705 | 35.910517 |
| C  | 48.090856 | 5.548025 | 30.968341 | C | 16.992450 | 3.577380 | 35.030257 |
| C  | 47.059231 | 4.788152 | 30.377239 | C | 16.227095 | 4.667775 | 35.494013 |
| C  | 45.986247 | 4.340720 | 31.141596 | C | 16.189858 | 4.937653 | 36.887728 |
| O  | 49.610200 | 6.576740 | 27.933208 | C | 15.368226 | 5.981724 | 37.358708 |
| O  | 49.298178 | 4.404033 | 28.456587 | C | 14.644973 | 6.763401 | 36.466980 |
| C  | 49.389847 | 5.641934 | 28.784213 | C | 14.703910 | 6.537044 | 35.102166 |
| C  | 11.158284 | 7.260965 | 41.959133 | C | 15.500021 | 5.487224 | 34.590713 |
| C  | 10.287267 | 6.502972 | 41.186144 | O | 13.973037 | 7.400959 | 34.289282 |
| C  | 10.757252 | 5.394972 | 40.491132 | O | 17.269456 | 5.612476 | 39.613077 |
| C  | 12.099252 | 5.042967 | 40.571107 | O | 16.789755 | 3.452793 | 40.055267 |
| C  | 11.698220 | 3.178974 | 39.103108 | C | 17.010654 | 4.413995 | 39.234204 |
| C  | 10.356220 | 3.528979 | 39.024133 | C | 12.972269 | 5.800962 | 41.346096 |
| C  | 9.886236  | 4.637978 | 39.718145 | C | 12.500284 | 6.908961 | 42.040108 |
| O  | 9.453203  | 2.792985 | 38.218146 | C | 26.938689 | 7.124298 | 41.712190 |
| Cu | 17.236844 | 6.153136 | 41.521455 | C | 26.045798 | 6.183834 | 41.238974 |
| Cu | 16.684656 | 3.753955 | 42.019406 | C | 26.473659 | 4.902440 | 40.760025 |
| C  | 20.946852 | 4.097753 | 42.060476 | C | 27.882511 | 4.602859 | 40.839210 |
| C  | 21.424389 | 3.484909 | 43.233206 | C | 12.571236 | 3.934968 | 39.877095 |
| C  | 22.769788 | 3.173305 | 43.380495 | C | 27.455003 | 2.436273 | 39.820174 |
| C  | 23.661490 | 3.445637 | 42.349183 | C | 26.063846 | 2.717646 | 39.746759 |
| C  | 23.224164 | 4.026852 | 41.144891 | C | 25.566796 | 3.934616 | 40.203648 |
| C  | 21.851536 | 4.366626 | 40.995893 | O | 25.335882 | 1.700219 | 39.204415 |
| C  | 21.415751 | 4.927684 | 39.777727 | O | 15.272403 | 6.437077 | 41.372763 |
| C  | 22.319278 | 5.137670 | 38.737990 | O | 14.774428 | 4.282599 | 41.810941 |
| C  | 23.662130 | 4.796913 | 38.879777 | C | 14.425359 | 5.481706 | 41.509822 |
| C  | 24.125546 | 4.250601 | 40.080404 | C | 16.641131 | 5.852114 | 45.741259 |
| O  | 24.538837 | 4.947126 | 37.814973 | C | 17.633837 | 6.629905 | 46.365437 |
| O  | 19.146536 | 5.620474 | 41.694383 | C | 18.810009 | 6.898558 | 32.217278 |

|    |           |          |           |   |           |          |           |
|----|-----------|----------|-----------|---|-----------|----------|-----------|
| C  | 17.722546 | 6.448043 | 32.956951 | C | 31.298718 | 6.007157 | 37.465849 |
| C  | 16.696548 | 5.692287 | 32.357476 | C | 30.623520 | 6.848304 | 36.617744 |
| C  | 15.513594 | 5.422755 | 46.496358 | C | 30.564717 | 6.586276 | 35.222153 |
| C  | 14.438964 | 4.731247 | 45.898102 | C | 31.215242 | 5.483320 | 34.679295 |
| C  | 13.355420 | 4.312651 | 46.664547 | O | 29.835870 | 7.515756 | 34.532174 |
| C  | 14.557118 | 4.534438 | 32.483203 | O | 33.190141 | 5.302889 | 39.649694 |
| C  | 15.584023 | 5.249089 | 33.114279 | O | 32.305716 | 3.277991 | 40.087761 |
| O  | 13.461304 | 4.107524 | 33.224945 | C | 32.709699 | 4.184963 | 39.302657 |
| O  | 17.126230 | 6.454128 | 43.485453 | C | 28.779623 | 5.591532 | 41.363586 |
| O  | 16.607304 | 4.303492 | 43.926319 | C | 28.319513 | 6.837132 | 41.758041 |
| C  | 16.803319 | 5.515877 | 44.299692 | C | 42.258491 | 7.080932 | 42.229410 |
| Cu | 33.052714 | 6.010966 | 41.498554 | C | 41.439682 | 6.298577 | 41.423250 |
| Cu | 32.427714 | 3.558245 | 42.047231 | C | 41.975228 | 5.283709 | 40.605124 |
| C  | 36.600176 | 3.691933 | 41.750907 | C | 43.376619 | 5.048290 | 40.626958 |
| C  | 37.122926 | 2.737606 | 42.603440 | C | 28.337856 | 3.345589 | 40.342842 |
| C  | 38.502590 | 2.437920 | 42.564262 | C | 43.080360 | 3.310333 | 38.959048 |
| C  | 39.333022 | 3.078612 | 41.669520 | C | 41.710146 | 3.513920 | 38.947047 |
| C  | 38.833239 | 4.044144 | 40.735534 | C | 41.139165 | 4.504894 | 39.769493 |
| C  | 37.424483 | 4.343664 | 40.774775 | O | 40.954168 | 2.692256 | 38.115536 |
| C  | 36.893948 | 5.246673 | 39.808610 | O | 31.056181 | 6.216131 | 41.197430 |
| C  | 37.711182 | 5.842837 | 38.878624 | O | 30.558454 | 4.191150 | 42.038416 |
| C  | 39.110420 | 5.597215 | 38.866605 | C | 30.241035 | 5.311247 | 41.536860 |
| C  | 39.673554 | 4.704503 | 39.776064 | C | 32.345579 | 5.688983 | 45.680256 |
| O  | 39.902165 | 6.233279 | 37.958395 | C | 33.179988 | 6.638008 | 46.242238 |
| O  | 34.853564 | 5.270167 | 41.878789 | C | 34.620873 | 6.584427 | 32.298160 |
| O  | 34.330724 | 3.083065 | 41.987626 | C | 33.505933 | 6.228477 | 33.048478 |
| C  | 35.151758 | 4.041834 | 41.881005 | C | 32.397812 | 5.597876 | 32.452003 |
| C  | 32.616422 | 3.914194 | 37.835021 | C | 31.316591 | 5.058472 | 46.455052 |
| C  | 33.188981 | 2.755243 | 37.345006 | C | 30.388777 | 4.138136 | 45.888156 |
| C  | 33.166272 | 2.497561 | 35.957530 | C | 29.402031 | 3.567774 | 46.656133 |
| C  | 32.546379 | 3.375916 | 35.093385 | C | 30.144695 | 4.690073 | 32.586386 |
| C  | 31.904204 | 4.570834 | 35.556057 | C | 31.253023 | 5.268090 | 33.213915 |
| C  | 31.953181 | 4.841601 | 36.969117 | O | 29.004470 | 4.409277 | 33.328267 |

|    |           |          |           |    |           |          |           |
|----|-----------|----------|-----------|----|-----------|----------|-----------|
| O  | 32.733805 | 6.306732 | 43.440014 | C  | 44.203168 | 5.828607 | 41.480268 |
| O  | 32.561087 | 4.115174 | 43.929705 | C  | 43.627502 | 6.852887 | 42.253412 |
| C  | 32.559327 | 5.342249 | 44.240140 | C  | 43.915930 | 4.062772 | 39.777204 |
| Cu | 48.436772 | 6.379616 | 41.586312 | O  | 46.461492 | 6.585860 | 41.475995 |
| Cu | 48.002565 | 3.947486 | 42.043827 | O  | 46.072597 | 4.395907 | 41.854337 |
| C  | 52.242277 | 4.464616 | 41.931345 | C  | 45.665500 | 5.587971 | 41.605367 |
| C  | 52.828352 | 3.947593 | 43.079296 | C  | 47.867969 | 5.995104 | 45.794964 |
| C  | 54.201352 | 3.732573 | 43.123194 | C  | 48.835281 | 6.787778 | 46.439814 |
| C  | 54.987277 | 4.036578 | 42.018142 | C  | 50.040042 | 7.196905 | 32.165558 |
| C  | 54.401202 | 4.554601 | 40.869191 | C  | 48.978872 | 6.709313 | 32.920867 |
| C  | 53.028202 | 4.768621 | 40.826292 | C  | 47.992662 | 5.886133 | 32.344344 |
| C  | 52.442128 | 5.287645 | 39.677341 | C  | 46.732032 | 5.546887 | 46.525538 |
| C  | 53.229054 | 5.591649 | 38.571289 | C  | 45.684670 | 4.833060 | 45.905719 |
| C  | 54.601054 | 5.377629 | 38.616189 | C  | 44.591904 | 4.397171 | 46.649241 |
| C  | 55.187129 | 4.858606 | 39.764139 | C  | 45.912120 | 4.629387 | 32.501948 |
| O  | 55.314970 | 5.617636 | 37.405141 | C  | 46.903626 | 5.408195 | 33.114532 |
| O  | 50.364765 | 5.921711 | 41.727740 | O  | 44.836531 | 4.171542 | 33.254451 |
| O  | 49.978815 | 3.742822 | 42.172759 | O  | 48.336681 | 6.643516 | 43.552933 |
| C  | 50.774420 | 4.725814 | 41.954751 | O  | 47.910813 | 4.465732 | 43.961862 |
| C  | 48.273024 | 4.392798 | 37.803977 | C  | 48.054218 | 5.680737 | 44.352340 |
| C  | 49.062221 | 3.337691 | 37.311534 | C  | 9.830844  | 7.260885 | 57.522289 |
| C  | 49.122019 | 3.066612 | 35.951590 | C  | 8.959813  | 6.502896 | 56.749314 |
| C  | 48.391363 | 3.840944 | 35.057798 | C  | 9.429780  | 5.394897 | 56.054290 |
| C  | 47.565458 | 4.892713 | 35.506095 | C  | 10.771780 | 5.042887 | 56.134240 |
| C  | 47.491503 | 5.162944 | 36.899397 | C  | 10.370715 | 3.178901 | 54.666241 |
| C  | 46.612896 | 6.166549 | 37.353363 | C  | 9.028715  | 3.528910 | 54.587291 |
| C  | 45.866018 | 6.908520 | 36.446944 | C  | 8.558747  | 4.637908 | 55.281315 |
| C  | 45.956229 | 6.680615 | 35.083616 | O  | 8.125681  | 2.792922 | 53.781316 |
| C  | 46.810352 | 5.669578 | 34.587838 | Cu | 15.900714 | 6.105541 | 57.131398 |
| O  | 45.196881 | 7.505207 | 34.256177 | Cu | 15.327741 | 3.699339 | 57.564231 |
| O  | 48.473106 | 5.872419 | 39.663992 | C  | 19.585137 | 3.974703 | 57.469378 |
| O  | 48.112185 | 3.684015 | 40.074297 | C  | 20.123414 | 3.234788 | 58.537565 |
| C  | 48.286246 | 4.665946 | 39.266647 | C  | 21.472693 | 2.905736 | 58.568815 |

|   |           |          |           |    |           |          |           |
|---|-----------|----------|-----------|----|-----------|----------|-----------|
| C | 22.307294 | 3.299882 | 57.528311 | C  | 24.687816 | 3.044362 | 54.683726 |
| C | 21.806234 | 4.016658 | 56.424797 | C  | 24.133031 | 4.131126 | 55.396853 |
| C | 20.425149 | 4.346936 | 56.383237 | O  | 23.916650 | 2.147296 | 53.947706 |
| C | 19.914796 | 5.005938 | 55.245021 | O  | 13.946167 | 6.416967 | 56.971302 |
| C | 20.758935 | 5.357081 | 54.196071 | O  | 13.425643 | 4.261621 | 57.379225 |
| C | 22.120909 | 5.070689 | 54.251618 | C  | 13.090834 | 5.467677 | 57.088810 |
| C | 22.656933 | 4.393811 | 55.355948 | C  | 15.283042 | 5.695809 | 61.352094 |
| O | 22.952385 | 5.428855 | 53.196468 | C  | 16.314083 | 6.385792 | 61.978046 |
| O | 17.799661 | 5.544342 | 57.298097 | C  | 17.552936 | 6.942476 | 47.715914 |
| O | 17.287661 | 3.381183 | 57.687540 | C  | 16.476354 | 6.488183 | 48.469081 |
| C | 18.138932 | 4.321969 | 57.495444 | C  | 15.445692 | 5.729440 | 47.882074 |
| C | 15.653709 | 4.164402 | 53.332291 | C  | 14.198077 | 5.242813 | 62.095147 |
| C | 16.384010 | 3.071152 | 52.832567 | C  | 13.166036 | 4.552830 | 61.469195 |
| C | 16.429373 | 2.807313 | 51.470505 | C  | 12.083071 | 4.099834 | 62.213248 |
| C | 15.741150 | 3.626300 | 50.582545 | C  | 13.309296 | 4.569722 | 48.032495 |
| C | 14.974362 | 4.718419 | 51.038833 | C  | 14.340673 | 5.288789 | 48.651576 |
| C | 14.916699 | 4.983315 | 52.433807 | O  | 12.219823 | 4.146210 | 48.785473 |
| C | 14.097280 | 6.032331 | 52.895750 | O  | 15.771279 | 6.360964 | 59.104269 |
| C | 13.392555 | 6.821276 | 51.995312 | O  | 15.271233 | 4.195655 | 59.486097 |
| C | 13.467597 | 6.596555 | 50.630592 | C  | 15.449106 | 5.400375 | 59.893866 |
| C | 14.262086 | 5.541656 | 50.127112 | Cu | 31.481759 | 6.011152 | 57.120216 |
| O | 12.751590 | 7.465466 | 49.809835 | Cu | 30.987339 | 3.600143 | 57.621253 |
| O | 15.945404 | 5.609909 | 55.206357 | C  | 35.230398 | 3.987298 | 57.497462 |
| O | 15.422141 | 3.449781 | 55.593129 | C  | 35.785301 | 3.299452 | 58.591965 |
| C | 15.675418 | 4.423357 | 54.796631 | C  | 37.136276 | 2.979063 | 58.623254 |
| C | 11.644813 | 5.800876 | 56.909215 | C  | 37.956819 | 3.330172 | 57.557193 |
| C | 11.172845 | 6.908875 | 57.603239 | C  | 37.441234 | 4.000127 | 56.431049 |
| C | 25.329135 | 6.954177 | 57.534575 | C  | 36.057691 | 4.321162 | 56.389537 |
| C | 24.490384 | 6.108147 | 56.819212 | C  | 35.532988 | 4.931515 | 55.231172 |
| C | 24.995737 | 4.981642 | 56.137905 | C  | 36.365938 | 5.246406 | 54.161804 |
| C | 26.390162 | 4.710358 | 56.195779 | C  | 37.730728 | 4.972843 | 54.217286 |
| C | 11.243748 | 3.934890 | 55.440215 | C  | 38.281197 | 4.341970 | 55.341850 |
| C | 26.053722 | 2.815647 | 54.715571 | O  | 38.551081 | 5.297296 | 53.142890 |



|   |           |          |           |    |           |          |           |
|---|-----------|----------|-----------|----|-----------|----------|-----------|
| O | 33.401495 | 5.505957 | 57.274150 | C  | 33.065080 | 6.957126 | 47.612856 |
| O | 32.953329 | 3.345712 | 57.749048 | C  | 32.102094 | 6.353359 | 48.392799 |
| C | 33.776356 | 4.301255 | 57.515811 | C  | 31.182327 | 5.397778 | 47.849849 |
| C | 31.357795 | 3.936257 | 53.380942 | C  | 29.818163 | 5.242633 | 62.094342 |
| C | 32.184803 | 2.882240 | 52.952632 | C  | 28.786109 | 4.552656 | 61.468406 |
| C | 32.310888 | 2.576905 | 51.604400 | C  | 27.703155 | 4.099663 | 62.212477 |
| C | 31.602631 | 3.309468 | 50.658699 | C  | 29.278725 | 3.873519 | 48.038020 |
| C | 30.735196 | 4.351353 | 51.042676 | C  | 30.148453 | 4.784255 | 48.634975 |
| C | 30.606127 | 4.668350 | 52.422281 | O  | 28.300871 | 3.282348 | 48.778938 |
| C | 29.708734 | 5.683231 | 52.807962 | O  | 31.374195 | 6.316676 | 59.087074 |
| C | 28.989488 | 6.384156 | 51.846410 | O  | 30.920207 | 4.151619 | 59.526601 |
| C | 29.122594 | 6.098839 | 50.497554 | C  | 31.076131 | 5.369980 | 59.901835 |
| C | 29.996218 | 5.076349 | 50.077341 | Cu | 47.045986 | 6.237482 | 57.147482 |
| O | 28.378052 | 6.871241 | 49.610248 | Cu | 46.692054 | 3.781235 | 57.539319 |
| O | 31.519018 | 5.464762 | 55.205774 | C  | 50.914826 | 4.464382 | 57.493755 |
| O | 31.093109 | 3.296113 | 55.659151 | C  | 51.500920 | 3.947352 | 58.641694 |
| C | 31.314980 | 4.252695 | 54.833708 | C  | 52.873920 | 3.732327 | 58.685568 |
| C | 27.235807 | 5.554494 | 56.967849 | C  | 53.659827 | 4.036331 | 57.580503 |
| C | 26.687936 | 6.681922 | 57.607035 | C  | 53.073733 | 4.554362 | 56.431564 |
| C | 40.898539 | 6.911565 | 57.571806 | C  | 51.700733 | 4.768387 | 56.388690 |
| C | 40.080025 | 6.064433 | 56.836482 | C  | 51.114640 | 5.287417 | 55.239751 |
| C | 40.608372 | 4.957375 | 56.140300 | C  | 51.901547 | 5.591423 | 54.133687 |
| C | 42.008309 | 4.712353 | 56.196347 | C  | 53.273547 | 5.377397 | 54.178561 |
| C | 26.904961 | 3.630209 | 55.452035 | C  | 53.859639 | 4.858367 | 55.326499 |
| C | 41.708148 | 2.827518 | 54.696278 | O  | 53.987443 | 5.617405 | 52.967501 |
| C | 40.338293 | 3.031637 | 54.663756 | O  | 48.987937 | 5.853770 | 57.299107 |
| C | 39.762177 | 4.101559 | 55.385876 | O  | 48.676960 | 3.649114 | 57.671554 |
| O | 39.585196 | 2.124527 | 53.921439 | C  | 49.438289 | 4.668577 | 57.497761 |
| O | 29.512616 | 6.262128 | 56.989470 | C  | 46.950960 | 4.340859 | 53.318440 |
| O | 29.069920 | 4.094507 | 57.426835 | C  | 47.760367 | 3.311946 | 52.804138 |
| C | 28.691630 | 5.286286 | 57.134163 | C  | 47.806249 | 3.054755 | 51.441521 |
| C | 30.903116 | 5.695628 | 61.351271 | C  | 47.041696 | 3.817473 | 50.566757 |
| C | 31.934171 | 6.385605 | 61.977208 | C  | 46.200787 | 4.848129 | 51.036540 |

|   |           |          |           |   |           |          |           |
|---|-----------|----------|-----------|---|-----------|----------|-----------|
| C | 46.140254 | 5.102965 | 52.433228 | C | 13.063187 | 5.025805 | 64.207205 |
| C | 45.246595 | 6.082746 | 52.909323 | O | 10.943183 | 3.908824 | 64.361306 |
| C | 44.474441 | 6.819921 | 52.020468 | C | 31.882271 | 6.620587 | 63.346214 |
| C | 44.552307 | 6.609321 | 50.653629 | C | 30.799317 | 6.168593 | 64.089284 |
| C | 45.419978 | 5.620543 | 50.135711 | C | 29.767262 | 5.478616 | 63.464348 |
| O | 43.771859 | 7.433483 | 49.845677 | C | 27.651255 | 4.336645 | 63.581483 |
| O | 47.118430 | 5.782482 | 55.213127 | C | 28.683309 | 5.025622 | 64.206418 |
| O | 46.813643 | 3.575407 | 55.567254 | O | 26.563304 | 3.908650 | 64.360554 |
| C | 46.961443 | 4.581724 | 54.785637 | C | 47.502385 | 6.620342 | 63.345096 |
| C | 42.835984 | 5.565223 | 56.978402 | C | 46.419443 | 6.168348 | 64.088184 |
| C | 42.261475 | 6.666178 | 57.641043 | C | 45.387375 | 5.478376 | 63.463264 |
| C | 42.543994 | 3.651955 | 55.439488 | C | 43.271365 | 4.336411 | 63.580432 |
| O | 45.071143 | 6.377064 | 57.016971 | C | 44.303433 | 5.025383 | 64.205353 |
| O | 44.746576 | 4.171780 | 57.358699 | O | 42.183428 | 3.908416 | 64.359522 |
| C | 44.303943 | 5.354181 | 57.119883 | H | 12.119248 | 8.127008 | 26.935861 |
| C | 46.523192 | 5.695393 | 61.350166 | H | 10.573030 | 6.786802 | 25.566446 |
| C | 47.554258 | 6.385364 | 61.976087 | H | 13.383808 | 2.323397 | 22.982341 |
| C | 48.718636 | 7.102482 | 47.786976 | H | 9.847449  | 3.169628 | 22.677206 |
| C | 47.630713 | 6.636077 | 48.515368 | H | 22.119693 | 2.825435 | 28.220742 |
| C | 46.627742 | 5.855821 | 47.908290 | H | 24.514504 | 2.264603 | 28.246600 |
| C | 45.438249 | 5.242399 | 62.093255 | H | 25.984937 | 3.030459 | 26.453718 |
| C | 44.406182 | 4.552428 | 61.467335 | H | 21.464136 | 5.233174 | 24.053091 |
| C | 43.323240 | 4.099435 | 62.211424 | H | 22.942498 | 5.943527 | 22.281326 |
| C | 44.512630 | 4.653437 | 48.015962 | H | 19.531865 | 2.329405 | 22.589989 |
| C | 45.517603 | 5.391427 | 48.656514 | H | 19.679348 | 1.794080 | 20.190536 |
| O | 43.417515 | 4.207355 | 48.746960 | H | 18.480491 | 3.170810 | 18.536740 |
| O | 46.915441 | 6.437691 | 59.120426 | H | 16.651876 | 6.145499 | 22.827168 |
| O | 46.580400 | 4.232667 | 59.466739 | H | 15.506984 | 7.501049 | 21.165229 |
| C | 46.676176 | 5.439532 | 59.891582 | H | 14.495541 | 7.507987 | 27.087825 |
| C | 16.262158 | 6.620778 | 63.347051 | H | 27.505858 | 7.866105 | 27.024430 |
| C | 15.179191 | 6.168782 | 64.090104 | H | 26.034404 | 6.406400 | 25.743242 |
| C | 14.147152 | 5.478800 | 63.465152 | H | 14.941570 | 3.634219 | 24.311220 |
| C | 12.031146 | 4.336820 | 63.582253 | H | 29.091236 | 2.114657 | 23.024008 |

|   |           |          |           |   |           |          |           |
|---|-----------|----------|-----------|---|-----------|----------|-----------|
| H | 19.765932 | 6.935226 | 30.307146 | H | 50.920842 | 1.795225 | 20.189779 |
| H | 15.687118 | 4.494775 | 29.296548 | H | 49.720366 | 3.170956 | 18.535934 |
| H | 13.808015 | 3.757365 | 30.623694 | H | 47.862200 | 6.134477 | 22.823712 |
| H | 15.672058 | 6.861205 | 17.596404 | H | 46.741005 | 7.496675 | 21.164943 |
| H | 25.065095 | 6.108856 | 21.449826 | H | 45.544587 | 7.334431 | 27.207656 |
| H | 25.568591 | 2.478292 | 22.829329 | H | 46.225689 | 3.379975 | 24.472082 |
| H | 37.653869 | 2.832410 | 28.312275 | H | 50.986788 | 7.236481 | 30.249480 |
| H | 40.037239 | 2.239134 | 28.401334 | H | 47.057331 | 4.540114 | 29.321168 |
| H | 41.554085 | 2.935517 | 26.619045 | H | 45.209023 | 3.757858 | 30.666166 |
| H | 37.120666 | 5.182449 | 24.097291 | H | 46.912720 | 6.861611 | 17.595816 |
| H | 38.645206 | 5.814719 | 22.330497 | H | 56.056145 | 5.977135 | 21.104157 |
| H | 35.146553 | 2.326073 | 22.590614 | H | 10.790932 | 8.127999 | 42.498529 |
| H | 35.298074 | 1.793200 | 20.190391 | H | 9.244464  | 6.787093 | 41.129930 |
| H | 34.099859 | 3.170523 | 18.536517 | H | 12.055653 | 2.325328 | 38.543745 |
| H | 32.264795 | 6.144350 | 22.825735 | H | 8.519784  | 3.172195 | 38.238379 |
| H | 31.124834 | 7.499554 | 21.165135 | H | 20.740734 | 3.258923 | 44.043911 |
| H | 29.916660 | 7.406113 | 27.152137 | H | 23.123629 | 2.712663 | 44.297690 |
| H | 43.126474 | 7.748783 | 27.120055 | H | 24.701901 | 3.184044 | 42.495399 |
| H | 41.660530 | 6.256131 | 25.876072 | H | 20.376766 | 5.194001 | 39.606705 |
| H | 30.587745 | 3.536457 | 24.297365 | H | 21.963769 | 5.557931 | 37.806254 |
| H | 44.728457 | 1.926094 | 23.231811 | H | 18.243144 | 2.403499 | 37.944757 |
| H | 35.539031 | 6.581755 | 30.369113 | H | 18.273021 | 1.925009 | 35.533656 |
| H | 31.256123 | 4.522889 | 29.391020 | H | 17.034099 | 3.333526 | 33.978274 |
| H | 29.305660 | 4.001857 | 30.729254 | H | 15.260774 | 6.204419 | 38.414094 |
| H | 31.291527 | 6.860709 | 17.596402 | H | 14.023024 | 7.567782 | 36.836281 |
| H | 40.782865 | 5.904184 | 21.526913 | H | 13.169079 | 7.511376 | 42.645746 |
| H | 41.202727 | 2.274245 | 23.042219 | H | 26.573822 | 8.099121 | 42.050060 |
| H | 53.551989 | 3.700496 | 28.381353 | H | 24.983418 | 6.445142 | 41.220229 |
| H | 55.987723 | 3.326196 | 28.455771 | H | 13.612328 | 3.634923 | 39.867604 |
| H | 57.384069 | 3.866362 | 26.497866 | H | 27.797565 | 1.472652 | 39.434270 |
| H | 52.703463 | 5.451610 | 24.013877 | H | 18.484283 | 6.984667 | 45.794017 |
| H | 54.081052 | 5.975818 | 22.116742 | H | 19.585480 | 7.489018 | 32.695375 |
| H | 50.777435 | 2.335149 | 22.589573 | H | 17.682085 | 6.707280 | 34.006273 |

|   |           |          |           |   |           |          |           |
|---|-----------|----------|-----------|---|-----------|----------|-----------|
| H | 14.410451 | 4.516712 | 44.835160 | H | 51.374731 | 5.453647 | 39.579462 |
| H | 12.546032 | 3.780145 | 46.183778 | H | 52.752232 | 5.975923 | 37.680156 |
| H | 12.807984 | 3.573691 | 32.671547 | H | 49.643346 | 2.728821 | 37.994757 |
| H | 14.039366 | 7.172601 | 33.312125 | H | 49.739865 | 2.252314 | 35.586360 |
| H | 24.138992 | 5.490069 | 37.060477 | H | 48.463172 | 3.597598 | 34.007313 |
| H | 24.394563 | 1.916725 | 39.111962 | H | 46.477421 | 6.385573 | 38.406410 |
| H | 36.462208 | 2.236638 | 43.315782 | H | 45.196076 | 7.679236 | 36.803878 |
| H | 38.915074 | 1.694571 | 43.253809 | H | 44.251230 | 7.466472 | 42.893724 |
| H | 40.398389 | 2.827564 | 41.671514 | H | 44.981602 | 3.865275 | 39.723898 |
| H | 35.825139 | 5.463297 | 39.791064 | H | 49.690445 | 7.157595 | 45.885521 |
| H | 37.281307 | 6.525953 | 38.136171 | H | 50.782913 | 7.841387 | 32.624929 |
| H | 33.668587 | 2.056595 | 38.035757 | H | 48.924694 | 6.993663 | 33.963117 |
| H | 33.639833 | 1.592006 | 35.565042 | H | 45.686201 | 4.611733 | 44.843809 |
| H | 32.541652 | 3.131706 | 34.026298 | H | 43.802855 | 3.848822 | 46.152585 |
| H | 31.321409 | 6.231127 | 38.533913 | H | 44.205014 | 3.599227 | 32.714185 |
| H | 30.101022 | 7.730656 | 36.994611 | H | 45.295597 | 7.282274 | 33.280456 |
| H | 29.032631 | 7.579067 | 42.125137 | H | 54.726409 | 5.972256 | 36.665825 |
| H | 41.827224 | 7.865944 | 42.842685 | H | 9.463329  | 8.126931 | 58.063076 |
| H | 40.377629 | 6.505114 | 41.433509 | H | 7.916942  | 6.786694 | 56.693526 |
| H | 29.400670 | 3.104836 | 40.370902 | H | 10.728254 | 2.325576 | 54.106446 |
| H | 43.500853 | 2.550805 | 38.313074 | H | 7.191916  | 3.171153 | 53.802722 |
| H | 33.938414 | 7.118207 | 45.618344 | H | 19.485280 | 2.921655 | 59.356113 |
| H | 35.459620 | 7.082627 | 32.774400 | H | 21.875423 | 2.342438 | 59.404684 |
| H | 33.510042 | 6.466439 | 34.104536 | H | 23.352443 | 3.026925 | 57.584758 |
| H | 30.451670 | 3.886572 | 44.829012 | H | 18.862196 | 5.248341 | 55.142599 |
| H | 28.695803 | 2.863694 | 46.199962 | H | 20.344238 | 5.862361 | 53.334363 |
| H | 28.294202 | 3.943216 | 32.781755 | H | 16.929636 | 2.425882 | 53.511618 |
| H | 29.683923 | 7.263439 | 33.608040 | H | 17.002488 | 1.963630 | 51.099035 |
| H | 39.361351 | 6.823562 | 37.409233 | H | 15.799196 | 3.387284 | 49.530144 |
| H | 39.967369 | 2.900634 | 38.140551 | H | 13.977268 | 6.252470 | 53.950557 |
| H | 52.223668 | 3.708590 | 43.947188 | H | 12.769780 | 7.628022 | 52.357830 |
| H | 54.659293 | 3.327773 | 44.019757 | H | 11.840821 | 7.508344 | 58.212787 |
| H | 56.055379 | 3.866472 | 42.061162 | H | 24.921463 | 7.824314 | 58.039365 |

|   |           |          |           |   |           |          |           |
|---|-----------|----------|-----------|---|-----------|----------|-----------|
| H | 23.438445 | 6.353637 | 56.787205 | H | 28.504561 | 6.603974 | 48.645818 |
| H | 12.285129 | 3.636400 | 55.426434 | H | 38.051554 | 5.774133 | 52.407126 |
| H | 26.457054 | 1.986095 | 54.150414 | H | 38.601942 | 2.335093 | 53.922979 |
| H | 17.168907 | 6.737994 | 61.410739 | H | 50.894940 | 3.699485 | 59.506192 |
| H | 18.331379 | 7.537344 | 48.183479 | H | 53.331548 | 3.325382 | 59.581255 |
| H | 16.447433 | 6.747081 | 49.518862 | H | 54.727833 | 3.865676 | 57.623126 |
| H | 13.126173 | 4.378487 | 60.400390 | H | 50.047590 | 5.459349 | 55.145389 |
| H | 11.277469 | 3.575065 | 61.719148 | H | 51.424852 | 5.976983 | 53.243024 |
| H | 11.559287 | 3.614444 | 48.238743 | H | 48.363642 | 2.709088 | 53.473408 |
| H | 12.838335 | 7.245204 | 48.832300 | H | 48.437469 | 2.258607 | 51.059733 |
| H | 22.461191 | 5.934868 | 52.474762 | H | 47.100303 | 3.581776 | 49.513903 |
| H | 22.936489 | 2.372504 | 53.954945 | H | 45.119422 | 6.287612 | 53.966264 |
| H | 35.157102 | 3.015134 | 59.428478 | H | 43.795241 | 7.574475 | 52.394184 |
| H | 37.550745 | 2.453448 | 59.477676 | H | 42.884734 | 7.336869 | 58.221706 |
| H | 39.003015 | 3.061500 | 57.612767 | H | 43.607840 | 3.450032 | 55.394689 |
| H | 34.478269 | 5.164802 | 55.129969 | H | 48.405872 | 6.743972 | 61.407865 |
| H | 35.940860 | 5.714720 | 53.284378 | H | 49.475987 | 7.711030 | 48.270910 |
| H | 32.747541 | 2.304223 | 53.677102 | H | 47.570757 | 6.902188 | 49.561940 |
| H | 32.963267 | 1.768621 | 51.288864 | H | 44.382059 | 4.363764 | 60.399400 |
| H | 31.727548 | 3.042139 | 49.617710 | H | 42.519449 | 3.571445 | 61.717699 |
| H | 29.541551 | 5.943115 | 53.848192 | H | 42.778495 | 3.661340 | 48.188443 |
| H | 28.305766 | 7.166234 | 52.149515 | H | 43.855580 | 7.218886 | 48.866924 |
| H | 27.326316 | 7.346837 | 58.177630 | H | 53.398606 | 5.970464 | 52.227591 |
| H | 40.472789 | 7.764354 | 58.091004 | H | 17.068429 | 7.157670 | 63.836085 |
| H | 39.024788 | 6.293747 | 56.802991 | H | 15.148116 | 6.357185 | 65.155565 |
| H | 27.964871 | 3.406286 | 55.412375 | H | 10.263250 | 3.421641 | 63.797056 |
| H | 42.127223 | 2.010854 | 54.123874 | H | 32.688944 | 7.156689 | 63.835383 |
| H | 32.790505 | 6.733697 | 61.409820 | H | 30.768141 | 6.356916 | 65.154737 |
| H | 33.748287 | 7.686934 | 48.058561 | H | 25.882127 | 3.423710 | 63.795758 |
| H | 32.042093 | 6.622077 | 49.452040 | H | 48.307605 | 7.158948 | 63.833797 |
| H | 28.747678 | 4.377301 | 60.399419 | H | 46.387794 | 6.357236 | 65.153501 |
| H | 26.897508 | 3.574933 | 61.718304 | H | 41.501438 | 3.424823 | 63.794455 |
| H | 27.792544 | 2.668772 | 48.224248 | H | 54.922536 | 4.682745 | 55.325778 |

|   |           |           |           |        |           |           |           |
|---|-----------|-----------|-----------|--------|-----------|-----------|-----------|
| H | 56.250077 | 4.683142  | 39.763697 | H      | 32.031440 | 10.327350 | 38.965742 |
| H | 57.578881 | 4.683428  | 24.200634 | H      | 33.628945 | 10.957993 | 42.804112 |
| H | 32.654265 | 5.043340  | 18.026541 | H      | 25.390860 | 8.017005  | 39.147257 |
| H | 17.034837 | 5.043596  | 18.026699 | H      | 23.410992 | 8.788309  | 37.868950 |
| H | 10.176567 | 4.915317  | 24.089695 | H      | 23.396281 | 8.678547  | 35.362989 |
| H | 8.848034  | 4.915642  | 39.653240 | H      | 25.425748 | 7.812799  | 34.173428 |
| H | 7.520577  | 4.915561  | 55.216401 | H      | 27.418040 | 7.073057  | 35.450315 |
| H | 12.998935 | 5.198970  | 65.269014 | H      | 28.260321 | 6.378630  | 37.653353 |
| H | 28.618788 | 5.198898  | 65.268157 | H      | 27.503496 | 6.846186  | 39.095424 |
| H | 44.238642 | 5.198806  | 65.267028 |        |           |           |           |
| H | 48.273999 | 5.043194  | 18.026068 | RCext1 |           |           |           |
| C | 32.495385 | 8.998120  | 40.585410 | C      | 12.487000 | 7.261000  | 26.395000 |
| C | 33.073510 | 9.090174  | 41.943015 | C      | 11.616000 | 6.503000  | 25.622000 |
| C | 34.126679 | 10.122367 | 42.274216 | C      | 12.086000 | 5.395000  | 24.927000 |
| C | 34.840985 | 10.642179 | 41.016395 | C      | 13.428000 | 5.043000  | 25.007000 |
| C | 33.821362 | 11.090568 | 39.959079 | C      | 13.027000 | 3.179000  | 23.539000 |
| C | 32.930594 | 9.931724  | 39.470700 | C      | 11.685000 | 3.529000  | 23.460000 |
| O | 33.513327 | 8.064683  | 41.028558 | C      | 11.215000 | 4.638000  | 24.154000 |
| C | 26.536703 | 7.462564  | 37.394762 | O      | 10.782000 | 2.793000  | 22.654000 |
| C | 25.397288 | 7.976174  | 38.054337 | Cu     | 18.546181 | 6.113565  | 26.005094 |
| C | 24.283674 | 8.404174  | 37.328823 | Cu     | 17.970658 | 3.726077  | 26.534990 |
| C | 24.270013 | 8.340751  | 35.928876 | C      | 22.241758 | 4.014458  | 26.404081 |
| C | 25.407045 | 7.853227  | 35.268496 | C      | 22.773540 | 3.244197  | 27.454792 |
| C | 26.526804 | 7.422716  | 35.981575 | C      | 24.129589 | 2.944706  | 27.505503 |
| N | 27.647327 | 7.048395  | 38.110196 | C      | 24.980007 | 3.400435  | 26.503913 |
| H | 34.847939 | 9.676500  | 42.984258 | C      | 24.488823 | 4.146502  | 25.416355 |
| H | 32.496642 | 8.685582  | 42.784782 | C      | 23.100479 | 4.444210  | 25.351453 |
| H | 31.517823 | 8.510972  | 40.480965 | C      | 22.603826 | 5.127310  | 24.220845 |
| H | 35.483024 | 9.842492  | 40.603477 | C      | 23.466280 | 5.541771  | 23.210680 |
| H | 35.504951 | 11.481363 | 41.289190 | C      | 24.832910 | 5.287447  | 23.291753 |
| H | 33.181609 | 11.879625 | 40.401921 | C      | 25.356208 | 4.580061  | 24.382598 |
| H | 34.333890 | 11.552634 | 39.096591 | O      | 25.680992 | 5.702367  | 22.270838 |
| H | 33.464918 | 9.318455  | 38.721189 | O      | 20.443729 | 5.564465  | 26.184123 |

|   |           |          |           |    |           |          |           |
|---|-----------|----------|-----------|----|-----------|----------|-----------|
| O | 19.939048 | 3.418520 | 26.661380 | C  | 15.693417 | 4.788318 | 30.335200 |
| C | 20.789081 | 4.352247 | 26.424169 | C  | 14.584813 | 4.391152 | 31.076784 |
| C | 18.226927 | 4.022014 | 22.293999 | O  | 18.432828 | 6.446592 | 27.965204 |
| C | 18.992915 | 2.941012 | 21.873981 | O  | 17.912557 | 4.302104 | 28.434387 |
| C | 19.081890 | 2.638017 | 20.519979 | C  | 18.104084 | 5.520304 | 28.790969 |
| C | 18.404876 | 3.417024 | 19.587993 | Cu | 34.218090 | 6.109385 | 26.014950 |
| C | 17.639888 | 4.497025 | 20.008011 | Cu | 33.649373 | 3.728226 | 26.572888 |
| C | 17.550913 | 4.800019 | 21.362013 | C  | 37.902795 | 3.955084 | 26.337648 |
| C | 16.783924 | 5.881020 | 21.784030 | C  | 38.437141 | 3.245841 | 27.429548 |
| C | 16.107910 | 6.659026 | 20.850045 | C  | 39.781113 | 2.898277 | 27.466729 |
| C | 16.197885 | 6.355032 | 19.497042 | C  | 40.615795 | 3.244233 | 26.410665 |
| C | 16.963876 | 5.274031 | 19.076025 | C  | 40.119499 | 3.928747 | 25.284789 |
| O | 15.523872 | 7.185038 | 18.539057 | C  | 38.742157 | 4.274052 | 25.234547 |
| O | 18.569530 | 5.541877 | 24.103960 | C  | 38.236266 | 4.895983 | 24.074067 |
| O | 18.043906 | 3.400389 | 24.581528 | C  | 39.081569 | 5.193484 | 23.009010 |
| C | 18.274776 | 4.344692 | 23.745372 | C  | 40.441912 | 4.899243 | 23.075106 |
| C | 14.301000 | 5.801000 | 25.782000 | C  | 40.974117 | 4.264388 | 24.205870 |
| C | 13.829000 | 6.909000 | 26.476000 | O  | 41.276085 | 5.212741 | 22.007737 |
| C | 28.054213 | 7.197552 | 26.471221 | O  | 36.122685 | 5.532890 | 26.106870 |
| C | 27.205956 | 6.333128 | 25.787858 | O  | 35.607726 | 3.400460 | 26.634323 |
| C | 27.701139 | 5.182426 | 25.141835 | C  | 36.459894 | 4.320247 | 26.364444 |
| C | 29.093947 | 4.903696 | 25.205522 | C  | 33.846855 | 4.021974 | 22.293721 |
| C | 13.900000 | 3.935000 | 24.313000 | C  | 34.612832 | 2.940971 | 21.873686 |
| C | 28.739246 | 2.960469 | 23.791914 | C  | 34.701783 | 2.637980 | 20.519681 |
| C | 27.375965 | 3.199148 | 23.754241 | C  | 34.024755 | 3.416991 | 19.587710 |
| C | 26.831022 | 4.313686 | 24.430768 | C  | 33.259777 | 4.496993 | 20.007743 |
| O | 26.597902 | 2.288877 | 23.042191 | C  | 33.170827 | 4.799985 | 21.361749 |
| O | 16.594846 | 6.414776 | 25.838705 | C  | 32.403849 | 5.880988 | 21.783783 |
| O | 16.068625 | 4.274714 | 26.319582 | C  | 31.727822 | 6.658998 | 20.849812 |
| C | 15.739992 | 5.469002 | 25.979699 | C  | 31.817772 | 6.355006 | 19.496807 |
| C | 17.914797 | 5.876634 | 30.224843 | C  | 32.583750 | 5.274004 | 19.075773 |
| C | 18.901477 | 6.647486 | 30.866997 | O  | 31.143744 | 7.185017 | 18.538837 |
| C | 16.763917 | 5.466637 | 30.955754 | O  | 34.164411 | 5.545420 | 24.110398 |

|    |           |          |           |   |           |          |           |
|----|-----------|----------|-----------|---|-----------|----------|-----------|
| O  | 33.661131 | 3.403480 | 24.601432 | C | 54.557834 | 5.591822 | 23.007903 |
| C  | 33.882768 | 4.344909 | 23.754769 | C | 55.929834 | 5.377808 | 23.052827 |
| C  | 29.949225 | 5.765814 | 25.949290 | C | 56.515890 | 4.858790 | 24.200790 |
| C  | 29.412364 | 6.918554 | 26.550729 | O | 56.643771 | 5.617813 | 21.841791 |
| C  | 43.532059 | 6.899085 | 26.424299 | O | 51.641268 | 5.843502 | 26.122114 |
| C  | 42.732743 | 6.031844 | 25.690569 | O | 51.332370 | 3.669567 | 26.642670 |
| C  | 43.279345 | 4.907698 | 25.037157 | C | 52.093482 | 4.671970 | 26.383321 |
| C  | 44.676595 | 4.664415 | 25.138625 | C | 49.466780 | 4.021882 | 22.293161 |
| C  | 29.598043 | 3.794398 | 24.496448 | C | 50.232747 | 2.940878 | 21.873109 |
| C  | 44.416395 | 2.736337 | 23.686171 | C | 50.321671 | 2.637891 | 20.519101 |
| C  | 43.048944 | 2.944059 | 23.604113 | C | 49.644629 | 3.416907 | 19.587145 |
| C  | 42.454502 | 4.032736 | 24.281151 | C | 48.879663 | 4.496911 | 20.007197 |
| O  | 42.316334 | 2.022300 | 22.859751 | C | 48.790739 | 4.799899 | 21.361205 |
| O  | 32.248281 | 6.427586 | 25.949803 | C | 48.023773 | 5.880903 | 21.783256 |
| O  | 31.749996 | 4.284594 | 26.442814 | C | 47.347732 | 6.658919 | 20.849300 |
| C  | 31.401338 | 5.477716 | 26.125311 | C | 47.437657 | 6.354932 | 19.496292 |
| C  | 33.911132 | 5.877682 | 30.272260 | C | 48.203622 | 5.273928 | 19.075240 |
| C  | 35.001149 | 6.595319 | 30.799410 | O | 46.763615 | 7.184949 | 18.538336 |
| C  | 32.823272 | 5.541027 | 31.125441 | O | 49.738148 | 5.595579 | 24.085198 |
| C  | 31.666833 | 4.903056 | 30.632645 | O | 49.388689 | 3.432143 | 24.609926 |
| C  | 30.612032 | 4.600296 | 31.489361 | C | 49.529494 | 4.372311 | 23.748673 |
| O  | 34.213344 | 6.440090 | 27.976847 | C | 45.484745 | 5.542868 | 25.912744 |
| O  | 33.676347 | 4.307926 | 28.480963 | C | 44.894368 | 6.660403 | 26.531306 |
| C  | 33.933231 | 5.518922 | 28.824898 | C | 45.231200 | 3.577683 | 24.434390 |
| Cu | 49.700096 | 6.216463 | 25.977100 | O | 47.720923 | 6.353131 | 25.869701 |
| Cu | 49.342242 | 3.801445 | 26.564130 | O | 47.393630 | 4.187358 | 26.407019 |
| C  | 53.571004 | 4.464799 | 26.367945 | C | 46.952251 | 5.346009 | 26.070894 |
| C  | 54.157059 | 3.947781 | 27.515908 | C | 49.192106 | 6.014251 | 30.212246 |
| C  | 55.530060 | 3.732767 | 27.559832 | C | 50.139479 | 6.850651 | 30.830664 |
| C  | 56.316003 | 4.036770 | 26.454793 | C | 48.076395 | 5.547550 | 30.962234 |
| C  | 55.729947 | 4.554788 | 25.305829 | C | 47.044802 | 4.792198 | 30.364673 |
| C  | 54.356948 | 4.768802 | 25.262905 | C | 45.968438 | 4.343519 | 31.123843 |
| C  | 53.770890 | 5.287820 | 24.113942 | O | 49.606996 | 6.583002 | 27.931878 |



|    |           |          |           |   |           |          |           |
|----|-----------|----------|-----------|---|-----------|----------|-----------|
| O  | 49.289035 | 4.410896 | 28.453378 | C | 14.653457 | 6.853874 | 36.457268 |
| C  | 49.381917 | 5.648098 | 28.782151 | C | 14.694240 | 6.633285 | 35.090518 |
| C  | 11.158284 | 7.260965 | 41.959133 | C | 15.461320 | 5.568539 | 34.566209 |
| C  | 10.287267 | 6.502972 | 41.186144 | O | 13.976809 | 7.518382 | 34.288940 |
| C  | 10.757252 | 5.394972 | 40.491132 | O | 17.259662 | 5.616893 | 39.583904 |
| C  | 12.099252 | 5.042967 | 40.571107 | O | 16.763496 | 3.458606 | 40.011898 |
| C  | 11.698220 | 3.178974 | 39.103108 | C | 16.983334 | 4.424965 | 39.196088 |
| C  | 10.356220 | 3.528979 | 39.024133 | C | 12.972269 | 5.800962 | 41.346096 |
| C  | 9.886236  | 4.637978 | 39.718145 | C | 12.500284 | 6.908961 | 42.040108 |
| O  | 9.453203  | 2.792985 | 38.218146 | C | 27.061955 | 7.333472 | 41.963419 |
| Cu | 17.245620 | 6.140641 | 41.499176 | C | 26.159593 | 6.450505 | 41.406532 |
| Cu | 16.689538 | 3.741057 | 41.981810 | C | 26.568140 | 5.191965 | 40.858924 |
| C  | 20.964484 | 4.054276 | 41.954534 | C | 27.969093 | 4.857213 | 40.939389 |
| C  | 21.425596 | 3.258993 | 43.020982 | C | 12.571236 | 3.934968 | 39.877095 |
| C  | 22.772324 | 2.944486 | 43.151740 | C | 27.516162 | 2.773487 | 39.768623 |
| C  | 23.687458 | 3.404401 | 42.212532 | C | 26.129880 | 3.080159 | 39.711053 |
| C  | 23.273257 | 4.174521 | 41.111403 | C | 25.647218 | 4.273682 | 40.241495 |
| C  | 21.894519 | 4.500081 | 40.970473 | O | 25.390631 | 2.108146 | 39.098424 |
| C  | 21.480949 | 5.223950 | 39.833218 | O | 15.277900 | 6.434515 | 41.368476 |
| C  | 22.413356 | 5.641024 | 38.886857 | O | 14.777437 | 4.280771 | 41.804548 |
| C  | 23.765991 | 5.345418 | 39.037455 | C | 14.428141 | 5.480968 | 41.507655 |
| C  | 24.205535 | 4.604969 | 40.138996 | C | 16.693336 | 5.816528 | 45.722474 |
| O  | 24.680624 | 5.759428 | 38.077583 | C | 17.698535 | 6.581292 | 46.343743 |
| O  | 19.156956 | 5.596938 | 41.653061 | C | 18.793459 | 6.965294 | 32.215005 |
| O  | 18.658641 | 3.443848 | 42.099965 | C | 17.696158 | 6.524355 | 32.946185 |
| C  | 19.507826 | 4.385623 | 41.896370 | C | 16.669464 | 5.776427 | 32.338794 |
| C  | 16.904066 | 4.155536 | 37.734567 | C | 15.558154 | 5.410200 | 46.479349 |
| C  | 17.590252 | 3.042639 | 37.216303 | C | 14.476130 | 4.725860 | 45.886151 |
| C  | 17.586627 | 2.774904 | 35.854100 | C | 13.378758 | 4.342806 | 46.651770 |
| C  | 16.896520 | 3.611699 | 34.984393 | C | 14.513022 | 4.648664 | 32.443581 |
| C  | 16.170975 | 4.723378 | 35.460129 | C | 15.544645 | 5.346745 | 33.085971 |
| C  | 16.155248 | 4.987451 | 36.856147 | O | 13.400826 | 4.242288 | 33.172366 |
| C  | 15.366660 | 6.051195 | 37.338984 | O | 17.155117 | 6.428682 | 43.465520 |

|    |           |          |           |    |           |          |           |
|----|-----------|----------|-----------|----|-----------|----------|-----------|
| O  | 16.642495 | 4.275005 | 43.897610 | C  | 28.433232 | 7.009170 | 42.024693 |
| C  | 16.842449 | 5.485294 | 44.277400 | C  | 42.200892 | 7.041270 | 41.833331 |
| Cu | 33.171219 | 6.231492 | 41.745492 | C  | 41.401873 | 6.135307 | 41.145975 |
| Cu | 32.516299 | 3.766207 | 42.260251 | C  | 41.957591 | 5.006509 | 40.512829 |
| C  | 36.717629 | 3.867824 | 42.185098 | C  | 43.364032 | 4.801133 | 40.580150 |
| C  | 37.305571 | 3.301832 | 43.299380 | C  | 28.407777 | 3.629068 | 40.362212 |
| C  | 38.691615 | 3.020610 | 43.286424 | C  | 43.108983 | 2.843473 | 39.166800 |
| C  | 39.461105 | 3.311039 | 42.178245 | C  | 41.733144 | 2.998189 | 39.145753 |
| C  | 38.890563 | 3.877836 | 40.992148 | C  | 41.136379 | 4.085624 | 39.814952 |
| C  | 37.472727 | 4.122172 | 40.998555 | O  | 40.999390 | 2.024103 | 38.473605 |
| C  | 36.850120 | 4.577626 | 39.804032 | O  | 31.163091 | 6.394674 | 41.509536 |
| C  | 37.590922 | 4.837212 | 38.680785 | O  | 30.629586 | 4.301657 | 42.127127 |
| C  | 39.007403 | 4.731013 | 38.704424 | C  | 30.328915 | 5.468301 | 41.730020 |
| C  | 39.661375 | 4.223327 | 39.827357 | C  | 32.336274 | 5.976874 | 45.877414 |
| O  | 39.710251 | 5.127646 | 37.609559 | C  | 33.210244 | 6.827480 | 46.532589 |
| O  | 35.011699 | 5.484207 | 42.048310 | C  | 35.050616 | 6.937275 | 32.144452 |
| O  | 34.423969 | 3.335713 | 42.390147 | C  | 34.006524 | 6.580231 | 32.989153 |
| C  | 35.272245 | 4.256189 | 42.215850 | C  | 32.882467 | 5.889020 | 32.503064 |
| C  | 32.819748 | 4.128611 | 38.054584 | C  | 31.195864 | 5.431472 | 46.552083 |
| C  | 33.281901 | 2.908882 | 37.590560 | C  | 30.208300 | 4.635955 | 45.898566 |
| C  | 33.337255 | 2.658902 | 36.203586 | C  | 29.119663 | 4.155645 | 46.588971 |
| C  | 32.894383 | 3.607278 | 35.305382 | C  | 30.681081 | 4.913603 | 32.844613 |
| C  | 32.362825 | 4.867825 | 35.731156 | C  | 31.810060 | 5.557653 | 33.360925 |
| C  | 32.342954 | 5.133662 | 37.146932 | O  | 29.618859 | 4.608030 | 33.685753 |
| C  | 31.805975 | 6.377134 | 37.591906 | O  | 32.962199 | 6.574789 | 43.683634 |
| C  | 31.342441 | 7.308498 | 36.699585 | O  | 32.508491 | 4.412430 | 44.125088 |
| C  | 31.364132 | 7.059594 | 35.301423 | C  | 32.622084 | 5.628810 | 44.452198 |
| C  | 31.856303 | 5.853408 | 34.811254 | Cu | 48.403642 | 6.328721 | 41.556798 |
| O  | 30.860281 | 8.090381 | 34.560809 | Cu | 47.998642 | 3.896532 | 42.030553 |
| O  | 33.265170 | 5.510995 | 39.910162 | C  | 52.242277 | 4.464616 | 41.931345 |
| O  | 32.526650 | 3.425475 | 40.300443 | C  | 52.828352 | 3.947593 | 43.079296 |
| C  | 32.864247 | 4.370463 | 39.528518 | C  | 54.201352 | 3.732573 | 43.123194 |
| C  | 28.877325 | 5.785657 | 41.549073 | C  | 54.987277 | 4.036578 | 42.018142 |

|   |           |          |           |    |           |          |           |
|---|-----------|----------|-----------|----|-----------|----------|-----------|
| C | 54.401202 | 4.554601 | 40.869191 | C  | 48.962758 | 6.693417 | 32.924395 |
| C | 53.028202 | 4.768621 | 40.826292 | C  | 47.976090 | 5.876460 | 32.340183 |
| C | 52.442128 | 5.287645 | 39.677341 | C  | 46.706662 | 5.517321 | 46.511632 |
| C | 53.229054 | 5.591649 | 38.571289 | C  | 45.664385 | 4.787475 | 45.902556 |
| C | 54.601054 | 5.377629 | 38.616189 | C  | 44.572607 | 4.358448 | 46.651902 |
| C | 55.187129 | 4.858606 | 39.764139 | C  | 45.892265 | 4.623875 | 32.485886 |
| O | 55.314970 | 5.617636 | 37.405141 | C  | 46.885067 | 5.395492 | 33.105030 |
| O | 50.341230 | 5.900090 | 41.718774 | O  | 44.814224 | 4.164195 | 33.233716 |
| O | 49.981121 | 3.718333 | 42.167231 | O  | 48.282541 | 6.607790 | 43.521846 |
| C | 50.767095 | 4.709872 | 41.949689 | O  | 47.893992 | 4.426510 | 43.946826 |
| C | 48.245024 | 4.327743 | 37.785534 | C  | 48.018807 | 5.646271 | 44.329392 |
| C | 49.002394 | 3.252588 | 37.286422 | C  | 9.830844  | 7.260885 | 57.522289 |
| C | 49.043482 | 2.981203 | 35.925690 | C  | 8.959813  | 6.502896 | 56.749314 |
| C | 48.326194 | 3.774752 | 35.037881 | C  | 9.429780  | 5.394897 | 56.054290 |
| C | 47.531990 | 4.847412 | 35.492678 | C  | 10.771780 | 5.042887 | 56.134240 |
| C | 47.475715 | 5.118656 | 36.886462 | C  | 10.370715 | 3.178901 | 54.666241 |
| C | 46.627686 | 6.146726 | 37.345650 | C  | 9.028715  | 3.528910 | 54.587291 |
| C | 45.897932 | 6.911655 | 36.444118 | C  | 8.558747  | 4.637908 | 55.281315 |
| C | 45.971923 | 6.680955 | 35.080615 | O  | 8.125681  | 2.792922 | 53.781316 |
| C | 46.793433 | 5.646226 | 34.579770 | Cu | 15.899776 | 6.129092 | 57.132055 |
| O | 45.229728 | 7.525738 | 34.258086 | Cu | 15.342929 | 3.717548 | 57.552012 |
| O | 48.464480 | 5.809291 | 39.640896 | C  | 19.602987 | 4.022957 | 57.426205 |
| O | 48.113636 | 3.621681 | 40.061337 | C  | 20.158762 | 3.257294 | 58.467457 |
| C | 48.277230 | 4.601663 | 39.248510 | C  | 21.510880 | 2.937069 | 58.474133 |
| C | 44.171131 | 5.702132 | 41.332845 | C  | 22.331385 | 3.365878 | 57.436611 |
| C | 43.569992 | 6.827568 | 41.926855 | C  | 21.814710 | 4.112884 | 56.361150 |
| C | 43.925941 | 3.723236 | 39.868137 | C  | 20.430494 | 4.433315 | 56.342792 |
| O | 46.422267 | 6.503075 | 41.412467 | C  | 19.905553 | 5.122397 | 55.229090 |
| O | 46.061006 | 4.316655 | 41.824664 | C  | 20.738391 | 5.515874 | 54.186119 |
| C | 45.637699 | 5.493425 | 41.530975 | C  | 22.103408 | 5.240684 | 54.221587 |
| C | 47.836682 | 5.967569 | 45.772502 | C  | 22.653603 | 4.531055 | 55.298055 |
| C | 48.802343 | 6.769820 | 46.408917 | O  | 22.923247 | 5.644748 | 53.173641 |
| C | 50.026480 | 7.183737 | 32.174797 | O  | 17.802914 | 5.581415 | 57.294197 |

|   |           |          |           |    |           |          |           |
|---|-----------|----------|-----------|----|-----------|----------|-----------|
| O | 17.308407 | 3.412280 | 57.669498 | C  | 16.534338 | 6.475552 | 48.445884 |
| C | 18.152835 | 4.359713 | 57.476287 | C  | 15.490026 | 5.734017 | 47.861560 |
| C | 15.662528 | 4.204910 | 53.319571 | C  | 14.198077 | 5.242813 | 62.095147 |
| C | 16.364660 | 3.091089 | 52.823823 | C  | 13.166036 | 4.552830 | 61.469195 |
| C | 16.401826 | 2.819133 | 51.463370 | C  | 12.083071 | 4.099834 | 62.213248 |
| C | 15.731574 | 3.648129 | 50.571999 | C  | 13.327597 | 4.624418 | 48.014963 |
| C | 14.993402 | 4.761763 | 51.022291 | C  | 14.371824 | 5.327770 | 48.630804 |
| C | 14.947275 | 5.039276 | 52.415894 | O  | 12.223508 | 4.237292 | 48.766346 |
| C | 14.159390 | 6.115870 | 52.869970 | O  | 15.767654 | 6.372257 | 59.106964 |
| C | 13.472402 | 6.914605 | 51.963941 | O  | 15.279965 | 4.202388 | 59.478482 |
| C | 13.533581 | 6.673194 | 50.601351 | C  | 15.450129 | 5.406312 | 59.892118 |
| C | 14.298108 | 5.593354 | 50.105068 | Cu | 31.470730 | 6.089964 | 57.124010 |
| O | 12.837146 | 7.552348 | 49.775038 | Cu | 30.962626 | 3.674185 | 57.573998 |
| O | 15.949233 | 5.644959 | 55.203030 | C  | 35.209751 | 4.030578 | 57.450474 |
| O | 15.437734 | 3.480681 | 55.578876 | C  | 35.758783 | 3.329870 | 58.540296 |
| C | 15.684002 | 4.459534 | 54.786449 | C  | 37.107532 | 2.999733 | 58.571259 |
| C | 11.644813 | 5.800876 | 56.909215 | C  | 37.932478 | 3.353083 | 57.509690 |
| C | 11.172845 | 6.908875 | 57.603239 | C  | 37.423915 | 4.037249 | 56.388988 |
| C | 25.312649 | 7.051276 | 57.536338 | C  | 36.042479 | 4.369707 | 56.347936 |
| C | 24.480500 | 6.226556 | 56.789097 | C  | 35.524874 | 4.997223 | 55.195843 |
| C | 24.990857 | 5.115688 | 56.086597 | C  | 36.363560 | 5.316925 | 54.131816 |
| C | 26.384458 | 4.841494 | 56.150413 | C  | 37.725887 | 5.029212 | 54.185926 |
| C | 11.243748 | 3.934890 | 55.440215 | C  | 38.269559 | 4.382587 | 55.305088 |
| C | 26.057588 | 2.980629 | 54.625110 | O  | 38.550375 | 5.357159 | 53.115533 |
| C | 24.691809 | 3.209777 | 54.590227 | O  | 33.390685 | 5.567278 | 57.253050 |
| C | 24.132573 | 4.280806 | 55.323153 | O  | 32.927944 | 3.402429 | 57.695012 |
| O | 23.924339 | 2.328381 | 53.831651 | C  | 33.757070 | 4.355359 | 57.471452 |
| O | 13.943114 | 6.427961 | 56.972758 | C  | 31.235812 | 4.124845 | 53.347370 |
| O | 13.435687 | 4.267610 | 57.369719 | C  | 32.000077 | 3.066114 | 52.887729 |
| C | 13.093312 | 5.473093 | 57.085314 | C  | 32.049588 | 2.788821 | 51.501546 |
| C | 15.283042 | 5.695809 | 61.352094 | C  | 31.337987 | 3.562878 | 50.611460 |
| C | 16.314083 | 6.385792 | 61.978046 | C  | 30.518926 | 4.639082 | 51.057801 |
| C | 17.621572 | 6.902195 | 47.692677 | C  | 30.447049 | 4.933194 | 52.465668 |

|   |           |          |           |    |           |          |           |
|---|-----------|----------|-----------|----|-----------|----------|-----------|
| C | 29.555768 | 5.976835 | 52.876874 | O  | 31.379699 | 6.352547 | 59.099100 |
| C | 28.808922 | 6.686997 | 51.968911 | O  | 30.902375 | 4.184349 | 59.494736 |
| C | 28.919091 | 6.419458 | 50.581242 | C  | 31.070370 | 5.393039 | 59.894622 |
| C | 29.761921 | 5.416287 | 50.125326 | Cu | 47.041159 | 6.239413 | 57.144022 |
| O | 28.179385 | 7.185292 | 49.744359 | Cu | 46.684335 | 3.784495 | 57.535287 |
| O | 31.481393 | 5.594824 | 55.201708 | C  | 50.914826 | 4.464382 | 57.493755 |
| O | 31.057097 | 3.407848 | 55.609435 | C  | 51.500920 | 3.947352 | 58.641694 |
| C | 31.260389 | 4.390694 | 54.803846 | C  | 52.873920 | 3.732327 | 58.685568 |
| C | 27.223499 | 5.663416 | 56.953826 | C  | 53.659827 | 4.036331 | 57.580503 |
| C | 26.670272 | 6.774298 | 57.617673 | C  | 53.073733 | 4.554362 | 56.431564 |
| C | 40.892089 | 6.936566 | 57.544474 | C  | 51.700733 | 4.768387 | 56.388690 |
| C | 40.072979 | 6.094916 | 56.804065 | C  | 51.114640 | 5.287417 | 55.239751 |
| C | 40.597878 | 4.982609 | 56.114668 | C  | 51.901547 | 5.591423 | 54.133687 |
| C | 41.995687 | 4.724984 | 56.184603 | C  | 53.273547 | 5.377397 | 54.178561 |
| C | 26.904663 | 3.778168 | 55.385823 | C  | 53.859639 | 4.858367 | 55.326499 |
| C | 41.689618 | 2.834813 | 54.691945 | O  | 53.987443 | 5.617405 | 52.967501 |
| C | 40.322337 | 3.054356 | 54.642956 | O  | 48.985049 | 5.853931 | 57.294632 |
| C | 39.749976 | 4.133285 | 55.354475 | O  | 48.672424 | 3.650065 | 57.667417 |
| O | 39.567749 | 2.152918 | 53.895566 | C  | 49.435672 | 4.668883 | 57.495404 |
| O | 29.502059 | 6.362931 | 57.016924 | C  | 46.932691 | 4.340752 | 53.311499 |
| O | 29.046956 | 4.185950 | 57.396606 | C  | 47.722039 | 3.294825 | 52.799024 |
| C | 28.676925 | 5.386129 | 57.128132 | C  | 47.757004 | 3.029094 | 51.437653 |
| C | 30.903116 | 5.695628 | 61.351271 | C  | 47.000116 | 3.797732 | 50.562037 |
| C | 31.934171 | 6.385605 | 61.977208 | C  | 46.178663 | 4.844569 | 51.028780 |
| C | 33.023380 | 7.123425 | 47.901539 | C  | 46.132095 | 5.112665 | 52.424066 |
| C | 31.960066 | 6.580970 | 48.593450 | C  | 45.262766 | 6.116318 | 52.895714 |
| C | 31.014501 | 5.735151 | 47.943243 | C  | 44.500650 | 6.861187 | 52.004078 |
| C | 29.818163 | 5.242633 | 62.094342 | C  | 44.561544 | 6.632291 | 50.639203 |
| C | 28.786109 | 4.552656 | 61.468406 | C  | 45.404825 | 5.621005 | 50.125483 |
| C | 27.703155 | 4.099663 | 62.212477 | O  | 43.790054 | 7.461148 | 49.827892 |
| C | 28.966455 | 4.413176 | 47.977730 | O  | 47.110313 | 5.783802 | 55.207896 |
| C | 29.897407 | 5.190704 | 48.658510 | O  | 46.802986 | 3.577709 | 55.562589 |
| O | 27.916446 | 3.913578 | 48.678107 | C  | 46.949031 | 4.583499 | 54.779964 |

|   |           |          |           |   |           |          |           |
|---|-----------|----------|-----------|---|-----------|----------|-----------|
| C | 42.825599 | 5.575398 | 56.968765 | C | 46.419443 | 6.168348 | 64.088184 |
| C | 42.253075 | 6.682104 | 57.624267 | C | 45.387375 | 5.478376 | 63.463264 |
| C | 42.526953 | 3.654374 | 55.439378 | C | 43.271365 | 4.336411 | 63.580432 |
| O | 45.064647 | 6.382487 | 57.014453 | C | 44.303433 | 5.025383 | 64.205353 |
| O | 44.736822 | 4.177924 | 57.354177 | O | 42.183428 | 3.908416 | 64.359522 |
| C | 44.294956 | 5.360895 | 57.114730 | H | 12.119209 | 8.127032 | 26.935796 |
| C | 46.523192 | 5.695393 | 61.350166 | H | 10.573037 | 6.786761 | 25.566470 |
| C | 47.554258 | 6.385364 | 61.976087 | H | 13.382432 | 2.322101 | 22.983375 |
| C | 48.688255 | 7.093533 | 47.754446 | H | 9.847358  | 3.169348 | 22.676421 |
| C | 47.604608 | 6.628649 | 48.489723 | H | 22.126035 | 2.888480 | 28.248542 |
| C | 46.603256 | 5.839855 | 47.891797 | H | 24.526485 | 2.359186 | 28.328640 |
| C | 45.438249 | 5.242399 | 62.093255 | H | 26.030432 | 3.152521 | 26.577809 |
| C | 44.406182 | 4.552428 | 61.467335 | H | 21.547883 | 5.337340 | 24.089822 |
| C | 43.323240 | 4.099435 | 62.211424 | H | 23.060892 | 6.066575 | 22.356358 |
| C | 44.491292 | 4.633936 | 48.015165 | H | 19.533761 | 2.331015 | 22.589877 |
| C | 45.495680 | 5.380492 | 48.646895 | H | 19.680073 | 1.794626 | 20.190438 |
| O | 43.395429 | 4.197183 | 48.750731 | H | 18.480862 | 3.171009 | 18.536745 |
| O | 46.913372 | 6.439947 | 59.118804 | H | 16.652300 | 6.145813 | 22.827053 |
| O | 46.574349 | 4.235586 | 59.463603 | H | 15.507195 | 7.501699 | 21.164005 |
| C | 46.673479 | 5.441671 | 59.889901 | H | 14.495648 | 7.508817 | 27.086856 |
| C | 16.262158 | 6.620778 | 63.347051 | H | 27.653793 | 8.086782 | 26.947059 |
| C | 15.179191 | 6.168782 | 64.090104 | H | 26.154898 | 6.582540 | 25.750559 |
| C | 14.147152 | 5.478800 | 63.465152 | H | 14.941022 | 3.631926 | 24.316734 |
| C | 12.031146 | 4.336820 | 63.582253 | H | 29.134287 | 2.107849 | 23.255718 |
| C | 13.063187 | 5.025805 | 64.207205 | H | 19.768553 | 6.990271 | 30.313285 |
| O | 10.943183 | 3.908824 | 64.361306 | H | 15.687282 | 4.568903 | 29.272836 |
| C | 31.882271 | 6.620587 | 63.346214 | H | 13.777778 | 3.871718 | 30.578233 |
| C | 30.799317 | 6.168593 | 64.089284 | H | 15.672522 | 6.861922 | 17.596265 |
| C | 29.767262 | 5.478616 | 63.464348 | H | 25.195321 | 6.222756 | 21.555567 |
| C | 27.651255 | 4.336645 | 63.581483 | H | 25.619993 | 2.524008 | 23.038097 |
| C | 28.683309 | 5.025622 | 64.206418 | H | 37.800081 | 2.970183 | 28.262670 |
| O | 26.563304 | 3.908650 | 64.360554 | H | 40.180139 | 2.359019 | 28.319884 |
| C | 47.502385 | 6.620342 | 63.345096 | H | 41.657269 | 2.958780 | 26.473682 |

|                                |                                |
|--------------------------------|--------------------------------|
| H 37.186468 5.149698 23.966941 | H 46.908364 6.858734 17.596190 |
| H 38.670065 5.668769 22.128992 | H 56.056697 5.974286 21.102333 |
| H 35.151044 2.330348 22.590847 | H 10.790906 8.128124 42.498320 |
| H 35.298992 1.793895 20.190282 | H 9.244413 6.786909 41.130228  |
| H 34.100505 3.170932 18.536501 | H 12.054167 2.324035 38.544699 |
| H 32.266436 6.143584 22.826458 | H 8.520658 3.174477 38.234317  |
| H 31.125079 7.500183 21.164020 | H 20.727648 2.893424 43.766420 |
| H 30.057496 7.596425 27.098255 | H 23.111154 2.341406 43.988079 |
| H 43.091745 7.763871 26.910074 | H 24.729658 3.143844 42.349054 |
| H 41.678273 6.258665 25.624674 | H 20.438850 5.465381 39.649461 |
| H 30.655638 3.560677 24.458405 | H 22.072053 6.198304 38.024788 |
| H 44.849000 1.899688 23.154063 | H 18.140167 2.385469 37.880466 |
| H 35.825555 6.880429 30.155193 | H 18.125026 1.915588 35.467737 |
| H 31.554800 4.642702 29.584688 | H 16.917162 3.369536 33.931283 |
| H 29.733962 4.112206 31.088209 | H 15.275174 6.271911 38.396369 |
| H 31.290200 6.860088 17.596456 | H 14.053433 7.670599 36.835862 |
| H 40.789506 5.701228 21.270926 | H 13.169686 7.511365 42.644994 |
| H 41.334082 2.235770 22.827495 | H 26.710912 8.290536 42.362158 |
| H 53.552178 3.700961 28.381637 | H 25.103509 6.738392 41.382513 |
| H 55.987801 3.326728 28.455981 | H 13.611681 3.633158 39.869895 |
| H 57.384024 3.866288 26.497948 | H 27.847509 1.834912 39.316253 |
| H 52.703546 5.453397 24.015259 | H 18.554396 6.921323 45.771162 |
| H 54.081375 5.977015 22.117040 | H 19.567310 7.552365 32.699065 |
| H 50.777749 2.335333 22.589487 | H 17.646863 6.787069 33.994373 |
| H 50.921002 1.795349 20.189763 | H 14.452643 4.488707 44.827818 |
| H 49.720251 3.170762 18.536008 | H 12.562711 3.817558 46.174393 |
| H 47.864594 6.135361 22.823932 | H 12.744811 3.718675 32.612017 |
| H 46.741390 7.497427 21.163783 | H 14.018647 7.285775 33.311401 |
| H 45.503916 7.350431 27.104209 | H 24.251652 6.303602 37.343572 |
| H 46.294235 3.365579 24.439816 | H 24.444698 2.319457 39.060974 |
| H 50.979294 7.233501 30.261509 | H 36.702822 3.092454 44.187755 |
| H 47.045245 4.549201 29.307309 | H 39.160320 2.578432 44.171212 |
| H 45.190413 3.765850 30.643412 | H 40.533326 3.093389 42.213449 |

|   |           |          |           |   |           |          |           |
|---|-----------|----------|-----------|---|-----------|----------|-----------|
| H | 35.771541 | 4.742739 | 39.771363 | H | 49.654997 | 7.139267 | 45.850042 |
| H | 37.097217 | 5.180867 | 37.767506 | H | 50.769705 | 7.822225 | 32.641329 |
| H | 33.620486 | 2.157777 | 38.308092 | H | 48.907273 | 6.970186 | 33.968680 |
| H | 33.732248 | 1.705749 | 35.838058 | H | 45.669484 | 4.548278 | 44.844362 |
| H | 32.954507 | 3.372279 | 34.237753 | H | 43.785883 | 3.800446 | 46.162497 |
| H | 31.762325 | 6.591883 | 38.658174 | H | 44.183112 | 3.594672 | 32.689944 |
| H | 30.931869 | 8.261837 | 37.042022 | H | 45.299671 | 7.287789 | 33.283353 |
| H | 29.150726 | 7.703714 | 42.468802 | H | 54.726430 | 5.966810 | 36.663207 |
| H | 41.753768 | 7.910861 | 42.304000 | H | 9.463380  | 8.126972 | 58.063051 |
| H | 40.339684 | 6.334063 | 41.097806 | H | 7.916951  | 6.786648 | 56.693756 |
| H | 29.465624 | 3.366537 | 40.386451 | H | 10.727093 | 2.324959 | 54.106596 |
| H | 43.547160 | 2.011011 | 38.631889 | H | 7.193490  | 3.175209 | 53.796568 |
| H | 34.055708 | 7.248907 | 45.981656 | H | 19.533080 | 2.918092 | 59.285366 |
| H | 35.903622 | 7.482981 | 32.535042 | H | 21.927860 | 2.354529 | 59.289260 |
| H | 34.077439 | 6.863389 | 34.030388 | H | 23.378715 | 3.097104 | 57.473516 |
| H | 30.307537 | 4.406985 | 44.836726 | H | 18.850244 | 5.357799 | 55.140983 |
| H | 28.365093 | 3.554397 | 46.068783 | H | 20.312307 | 6.045944 | 53.345281 |
| H | 28.875384 | 4.119080 | 33.208958 | H | 16.892927 | 2.433723 | 53.505447 |
| H | 30.883215 | 7.914250 | 33.607130 | H | 16.952128 | 1.959172 | 51.095784 |
| H | 39.121451 | 5.646572 | 37.032156 | H | 15.780621 | 3.399832 | 49.521388 |
| H | 40.002960 | 2.173742 | 38.515460 | H | 14.050068 | 6.351433 | 53.922531 |
| H | 52.223115 | 3.706137 | 43.946076 | H | 12.874767 | 7.743138 | 52.319949 |
| H | 54.659218 | 3.327404 | 44.019633 | H | 11.840793 | 7.509325 | 58.211844 |
| H | 56.055251 | 3.865868 | 42.061090 | H | 24.900165 | 7.906830 | 58.061075 |
| H | 51.375049 | 5.456877 | 39.580965 | H | 23.429309 | 6.474421 | 56.751556 |
| H | 52.752686 | 5.977183 | 37.680421 | H | 12.284827 | 3.635359 | 55.428807 |
| H | 49.574429 | 2.629118 | 37.964751 | H | 26.464369 | 2.161984 | 54.046478 |
| H | 49.637414 | 2.152367 | 35.554591 | H | 17.168702 | 6.738690 | 61.410823 |
| H | 48.382738 | 3.530546 | 33.986704 | H | 18.409586 | 7.484834 | 48.158935 |
| H | 46.501965 | 6.368410 | 38.398987 | H | 16.508156 | 6.742487 | 49.493844 |
| H | 45.253955 | 7.702667 | 36.804820 | H | 13.130250 | 4.374771 | 60.400657 |
| H | 44.175333 | 7.537535 | 42.479258 | H | 11.278280 | 3.573241 | 61.719710 |
| H | 44.995421 | 3.548806 | 39.828415 | H | 11.554598 | 3.711416 | 48.223835 |



|   |           |          |           |   |           |          |           |
|---|-----------|----------|-----------|---|-----------|----------|-----------|
| H | 12.913185 | 7.319183 | 48.799679 | H | 48.372506 | 2.220571 | 51.057092 |
| H | 22.421906 | 6.172227 | 52.474552 | H | 47.049066 | 3.553830 | 49.510626 |
| H | 22.944082 | 2.552749 | 53.840077 | H | 45.147485 | 6.335637 | 53.951098 |
| H | 35.127440 | 3.043594 | 59.373914 | H | 43.841851 | 7.635665 | 52.373793 |
| H | 37.516863 | 2.463708 | 59.421365 | H | 42.876143 | 7.351003 | 58.207371 |
| H | 38.976166 | 3.074271 | 57.564317 | H | 43.588577 | 3.439620 | 55.408186 |
| H | 34.470505 | 5.238136 | 55.095150 | H | 48.405868 | 6.743806 | 61.407837 |
| H | 35.943411 | 5.798702 | 53.259374 | H | 49.444163 | 7.708226 | 48.232236 |
| H | 32.580412 | 2.440807 | 53.574998 | H | 47.546657 | 6.902760 | 49.534488 |
| H | 32.658750 | 1.954788 | 51.139545 | H | 44.382681 | 4.361771 | 60.399774 |
| H | 31.382562 | 3.345111 | 49.541485 | H | 42.519209 | 3.571538 | 61.717843 |
| H | 29.439633 | 6.226411 | 53.934844 | H | 42.756780 | 3.643562 | 48.199176 |
| H | 28.121418 | 7.472962 | 52.291251 | H | 43.848494 | 7.220956 | 48.853290 |
| H | 27.303378 | 7.420928 | 58.215201 | H | 53.398601 | 5.964634 | 52.224812 |
| H | 40.467999 | 7.793081 | 58.058298 | H | 17.068788 | 7.157005 | 63.836247 |
| H | 39.019761 | 6.332566 | 56.761021 | H | 15.148347 | 6.357085 | 65.155561 |
| H | 27.966081 | 3.555062 | 55.349270 | H | 10.261922 | 3.422172 | 63.798223 |
| H | 42.105259 | 2.009485 | 54.129132 | H | 32.688523 | 7.157528 | 63.835064 |
| H | 32.789260 | 6.736549 | 61.409577 | H | 30.768381 | 6.356720 | 65.154688 |
| H | 33.730293 | 7.781527 | 48.415884 | H | 25.879845 | 3.426648 | 63.796001 |
| H | 31.823573 | 6.803817 | 49.654348 | H | 48.307237 | 7.159615 | 63.833645 |
| H | 28.748169 | 4.377083 | 60.399333 | H | 46.387898 | 6.357360 | 65.153446 |
| H | 26.898366 | 3.573626 | 61.718197 | H | 41.496445 | 3.432062 | 63.794251 |
| H | 27.352421 | 3.375379 | 48.098092 | H | 54.922472 | 4.682717 | 55.325506 |
| H | 28.340893 | 6.887358 | 48.828775 | H | 56.250017 | 4.683119 | 39.763406 |
| H | 38.054322 | 5.843041 | 52.383279 | H | 57.578845 | 4.683521 | 24.200325 |
| H | 38.587518 | 2.377414 | 53.881729 | H | 32.654321 | 5.043722 | 18.026509 |
| H | 50.894624 | 3.699033 | 59.505777 | H | 17.034742 | 5.043886 | 18.026663 |
| H | 53.331520 | 3.325457 | 59.581299 | H | 10.176533 | 4.915001 | 24.089415 |
| H | 54.727794 | 3.865701 | 57.623291 | H | 8.847895  | 4.915082 | 39.653409 |
| H | 50.047758 | 5.460950 | 55.145938 | H | 7.520500  | 4.915149 | 55.216502 |
| H | 51.425100 | 5.978061 | 53.243311 | H | 12.998700 | 5.198788 | 65.268980 |
| H | 48.317941 | 2.684408 | 53.468641 | H | 28.618566 | 5.198773 | 65.268037 |

|   |           |           |           |        |                              |
|---|-----------|-----------|-----------|--------|------------------------------|
| H | 44.238294 | 5.198790  | 65.266945 |        |                              |
| H | 48.273684 | 5.043270  | 18.026083 | RCext2 |                              |
| C | 34.018274 | 9.494937  | 41.700310 | C      | 12.487000 7.261000 26.395000 |
| C | 33.387591 | 9.308365  | 40.373125 | C      | 11.616000 6.503000 25.622000 |
| C | 31.883340 | 9.414561  | 40.190012 | C      | 12.086000 5.395000 24.927000 |
| C | 31.178383 | 10.078763 | 41.385538 | C      | 13.428000 5.043000 25.007000 |
| C | 31.691787 | 9.536431  | 42.725547 | C      | 13.027000 3.179000 23.539000 |
| C | 33.188282 | 9.832366  | 42.918103 | C      | 11.685000 3.529000 23.460000 |
| O | 33.842692 | 8.178092  | 41.150751 | C      | 11.215000 4.638000 24.154000 |
| C | 36.667895 | 7.782851  | 38.948484 | O      | 10.782000 2.793000 22.654000 |
| C | 37.805132 | 8.057336  | 38.159657 | Cu     | 18.545764 6.084974 26.019232 |
| C | 37.763341 | 7.902602  | 36.770514 | Cu     | 17.951770 3.697366 26.530411 |
| C | 36.590312 | 7.479751  | 36.129795 | C      | 22.218764 3.946423 26.385605 |
| C | 35.450748 | 7.228776  | 36.907567 | C      | 22.756430 3.177863 27.434202 |
| C | 35.481798 | 7.382886  | 38.293365 | C      | 24.109043 2.861444 27.465799 |
| N | 36.709654 | 7.894719  | 40.332853 | C      | 24.949067 3.299886 26.447726 |
| H | 31.673023 | 9.967215  | 39.257323 | C      | 24.449813 4.044515 25.362497 |
| H | 34.012827 | 9.459727  | 39.484119 | C      | 23.064566 4.356336 25.315727 |
| H | 35.078474 | 9.783068  | 41.724387 | C      | 22.557292 5.035127 24.186996 |
| H | 30.088884 | 9.917891  | 41.298737 | C      | 23.408232 5.430922 23.159682 |
| H | 31.341850 | 11.174396 | 41.349805 | C      | 24.773819 5.166909 23.224795 |
| H | 31.126196 | 9.981299  | 43.563575 | C      | 25.306488 4.465738 24.315163 |
| H | 31.528070 | 8.447613  | 42.772143 | O      | 25.611974 5.568694 22.190504 |
| H | 33.342321 | 10.909411 | 43.126665 | O      | 20.438063 5.517506 26.193311 |
| H | 33.579781 | 9.270068  | 43.785074 | O      | 19.915082 3.371878 26.654411 |
| H | 31.491821 | 8.391481  | 40.056635 | C      | 20.771962 4.299723 26.421599 |
| H | 38.737455 | 8.363252  | 38.646361 | C      | 18.226925 4.022012 22.293999 |
| H | 38.663563 | 8.119160  | 36.183632 | C      | 18.992913 2.941010 21.873981 |
| H | 36.564929 | 7.348306  | 35.044353 | C      | 19.081888 2.638015 20.519979 |
| H | 34.521508 | 6.883357  | 36.444055 | C      | 18.404874 3.417021 19.587993 |
| H | 34.603394 | 7.118220  | 38.885369 | C      | 17.639886 4.497022 20.008011 |
| H | 35.994040 | 7.370410  | 40.835919 | C      | 17.550911 4.800017 21.362013 |
| H | 37.631596 | 7.780527  | 40.746126 | C      | 16.783922 5.881019 21.784030 |

|    |           |          |           |   |           |          |           |
|----|-----------|----------|-----------|---|-----------|----------|-----------|
| C  | 16.107908 | 6.659025 | 20.850045 | C | 39.712958 | 2.837862 | 27.531449 |
| C  | 16.197883 | 6.355030 | 19.497042 | C | 40.556548 | 3.211531 | 26.491775 |
| C  | 16.963873 | 5.274029 | 19.076025 | C | 40.068152 | 3.918256 | 25.376636 |
| O  | 15.523870 | 7.185036 | 18.539057 | C | 38.689289 | 4.257046 | 25.320054 |
| O  | 18.566534 | 5.529570 | 24.113655 | C | 38.192527 | 4.905150 | 24.170223 |
| O  | 18.025015 | 3.388223 | 24.574921 | C | 39.048338 | 5.238778 | 23.124636 |
| C  | 18.266357 | 4.336562 | 23.746351 | C | 40.408854 | 4.947102 | 23.196246 |
| C  | 14.301000 | 5.801000 | 25.782000 | C | 40.931314 | 4.279916 | 24.313002 |
| C  | 13.829000 | 6.909000 | 26.476000 | O | 41.252643 | 5.294875 | 22.147178 |
| C  | 27.966528 | 7.051758 | 26.483030 | O | 36.044931 | 5.467760 | 26.187696 |
| C  | 27.131058 | 6.198881 | 25.770703 | O | 35.545310 | 3.316565 | 26.649179 |
| C  | 27.640691 | 5.069379 | 25.098257 | C | 36.391546 | 4.252560 | 26.418840 |
| C  | 29.034707 | 4.800106 | 25.164982 | C | 33.846853 | 4.021969 | 22.293716 |
| C  | 13.900000 | 3.935000 | 24.313000 | C | 34.612830 | 2.940966 | 21.873681 |
| C  | 28.706723 | 2.892328 | 23.697696 | C | 34.701779 | 2.637975 | 20.519676 |
| C  | 27.341572 | 3.120084 | 23.657666 | C | 34.024751 | 3.416985 | 19.587706 |
| C  | 26.782975 | 4.211684 | 24.359730 | C | 33.259774 | 4.496987 | 20.007739 |
| O  | 26.575122 | 2.219336 | 22.921445 | C | 33.170824 | 4.799980 | 21.361745 |
| O  | 16.597542 | 6.403167 | 25.853699 | C | 32.403846 | 5.880983 | 21.783779 |
| O  | 16.056233 | 4.263416 | 26.319556 | C | 31.727819 | 6.658993 | 20.849808 |
| C  | 15.736620 | 5.461753 | 25.985866 | C | 31.817769 | 6.355001 | 19.496803 |
| C  | 17.906535 | 5.817457 | 30.234791 | C | 32.583746 | 5.273997 | 19.075769 |
| C  | 18.894319 | 6.582246 | 30.882075 | O | 31.143739 | 7.185012 | 18.538833 |
| C  | 16.754362 | 5.404587 | 30.961996 | O | 34.121248 | 5.512664 | 24.152966 |
| C  | 15.684120 | 4.729172 | 30.337285 | O | 33.631044 | 3.355331 | 24.584281 |
| C  | 14.575875 | 4.326476 | 31.076435 | C | 33.856409 | 4.318205 | 23.763140 |
| O  | 18.432915 | 6.401630 | 27.981558 | C | 29.876192 | 5.648583 | 25.938714 |
| O  | 17.897799 | 4.256947 | 28.433372 | C | 29.325970 | 6.781763 | 26.564838 |
| C  | 18.096348 | 5.470965 | 28.799269 | C | 43.535124 | 6.873148 | 26.527664 |
| Cu | 34.136340 | 6.025557 | 26.076638 | C | 42.719170 | 6.012265 | 25.805002 |
| Cu | 33.584103 | 3.625683 | 26.563096 | C | 43.249992 | 4.891207 | 25.134132 |
| C  | 37.839027 | 3.904609 | 26.404577 | C | 44.647795 | 4.639954 | 25.211281 |
| C  | 38.366726 | 3.176574 | 27.487106 | C | 29.553528 | 3.714115 | 24.430861 |

|    |           |          |           |   |           |          |           |
|----|-----------|----------|-----------|---|-----------|----------|-----------|
| C  | 44.351943 | 2.716544 | 23.759565 | C | 50.321667 | 2.637886 | 20.519091 |
| C  | 42.985308 | 2.936168 | 23.696040 | C | 49.644624 | 3.416901 | 19.587136 |
| C  | 42.408782 | 4.027859 | 24.383353 | C | 48.879658 | 4.496905 | 20.007187 |
| O  | 42.235125 | 2.024284 | 22.956971 | C | 48.790735 | 4.799894 | 21.361195 |
| O  | 32.167427 | 6.327119 | 25.985084 | C | 48.023770 | 5.880898 | 21.783247 |
| O  | 31.681682 | 4.167563 | 26.415259 | C | 47.347728 | 6.658913 | 20.849290 |
| C  | 31.327181 | 5.365772 | 26.123827 | C | 47.437652 | 6.354926 | 19.496283 |
| C  | 33.759079 | 5.677045 | 30.328447 | C | 48.203617 | 5.273922 | 19.075230 |
| C  | 34.805783 | 6.446233 | 30.872377 | O | 46.763610 | 7.184943 | 18.538326 |
| C  | 32.690464 | 5.263671 | 31.175960 | O | 49.725059 | 5.588715 | 24.095214 |
| C  | 31.577149 | 4.558327 | 30.675386 | O | 49.386251 | 3.420849 | 24.607756 |
| C  | 30.541268 | 4.182336 | 31.526875 | C | 49.523214 | 4.366323 | 23.751286 |
| O  | 34.090500 | 6.300919 | 28.049397 | C | 45.474186 | 5.514003 | 25.971044 |
| O  | 33.573240 | 4.150463 | 28.487974 | C | 44.898771 | 6.630681 | 26.605649 |
| C  | 33.806104 | 5.354898 | 28.869558 | C | 45.184125 | 3.550902 | 24.496588 |
| Cu | 49.689524 | 6.197107 | 25.991956 | O | 47.709181 | 6.325062 | 25.895638 |
| Cu | 49.345031 | 3.777034 | 26.565009 | O | 47.393076 | 4.154907 | 26.421469 |
| C  | 53.571003 | 4.464794 | 26.367934 | C | 46.944816 | 5.315309 | 26.100137 |
| C  | 54.157057 | 3.947776 | 27.515897 | C | 49.192289 | 5.966345 | 30.228543 |
| C  | 55.530059 | 3.732762 | 27.559821 | C | 50.131478 | 6.811527 | 30.847255 |
| C  | 56.316002 | 4.036764 | 26.454782 | C | 48.080988 | 5.488972 | 30.979280 |
| C  | 55.729945 | 4.554783 | 25.305818 | C | 47.057146 | 4.723133 | 30.382246 |
| C  | 54.356946 | 4.768798 | 25.262894 | C | 45.983678 | 4.266659 | 31.140774 |
| C  | 53.770889 | 5.287815 | 24.113932 | O | 49.600942 | 6.549949 | 27.950181 |
| C  | 54.557833 | 5.591817 | 23.007892 | O | 49.296359 | 4.373113 | 28.459161 |
| C  | 55.929833 | 5.377802 | 23.052816 | C | 49.382498 | 5.608814 | 28.795532 |
| C  | 56.515888 | 4.858784 | 24.200779 | C | 11.158287 | 7.260976 | 41.959132 |
| O  | 56.643769 | 5.617808 | 21.841779 | C | 10.287269 | 6.502982 | 41.186144 |
| O  | 51.633385 | 5.833718 | 26.127071 | C | 10.757253 | 5.394981 | 40.491132 |
| O  | 51.336466 | 3.655106 | 26.634966 | C | 12.099253 | 5.042976 | 40.571108 |
| C  | 52.092183 | 4.663324 | 26.381411 | C | 11.698221 | 3.178982 | 39.103110 |
| C  | 49.466778 | 4.021877 | 22.293151 | C | 10.356221 | 3.528988 | 39.024135 |
| C  | 50.232744 | 2.940873 | 21.873099 | C | 9.886237  | 4.637987 | 39.718145 |

|    |           |          |           |    |           |          |           |
|----|-----------|----------|-----------|----|-----------|----------|-----------|
| O  | 9.453203  | 2.792994 | 38.218148 | C  | 26.898567 | 7.141350 | 42.502684 |
| Cu | 17.245085 | 6.098385 | 41.492382 | C  | 26.037884 | 6.342993 | 41.777227 |
| Cu | 16.667150 | 3.706620 | 41.989849 | C  | 26.498828 | 5.206434 | 41.037822 |
| C  | 20.944972 | 3.972125 | 41.896673 | C  | 27.904814 | 4.899475 | 41.106659 |
| C  | 21.407649 | 3.085296 | 42.888309 | C  | 12.571237 | 3.934977 | 39.877096 |
| C  | 22.754328 | 2.758965 | 42.987995 | C  | 27.558724 | 3.032778 | 39.587413 |
| C  | 23.669679 | 3.310201 | 42.099994 | C  | 26.168549 | 3.319395 | 39.520461 |
| C  | 23.254155 | 4.172473 | 41.069908 | C  | 25.630760 | 4.385173 | 40.236655 |
| C  | 21.873918 | 4.497463 | 40.950394 | O  | 25.482123 | 2.458912 | 38.711539 |
| C  | 21.458848 | 5.297902 | 39.864979 | O  | 15.282302 | 6.414295 | 41.363474 |
| C  | 22.390998 | 5.800904 | 38.961987 | O  | 14.761347 | 4.269972 | 41.822693 |
| C  | 23.745809 | 5.516541 | 39.102247 | C  | 14.424123 | 5.470809 | 41.513815 |
| C  | 24.186042 | 4.694643 | 40.143863 | C  | 16.726969 | 5.799000 | 45.717570 |
| O  | 24.661690 | 6.017146 | 38.185687 | C  | 17.767925 | 6.514968 | 46.337434 |
| O  | 19.147757 | 5.535880 | 41.648179 | C  | 18.785893 | 6.892377 | 32.231598 |
| O  | 18.633566 | 3.386551 | 42.090092 | C  | 17.686230 | 6.450742 | 32.958755 |
| C  | 19.489967 | 4.319386 | 41.875476 | C  | 16.658601 | 5.708038 | 32.346142 |
| C  | 16.875190 | 4.090603 | 37.741706 | C  | 15.575228 | 5.444499 | 46.474034 |
| C  | 17.557336 | 2.972687 | 37.228497 | C  | 14.469020 | 4.799763 | 45.881824 |
| C  | 17.555080 | 2.700970 | 35.866920 | C  | 13.355495 | 4.465475 | 46.646740 |
| C  | 16.870760 | 3.538747 | 34.993475 | C  | 14.502474 | 4.578578 | 32.443903 |
| C  | 16.147303 | 4.653536 | 35.465337 | C  | 15.531899 | 5.276872 | 33.089416 |
| C  | 16.129877 | 4.921375 | 36.860230 | O  | 13.390580 | 4.167269 | 33.170469 |
| C  | 15.344429 | 5.989047 | 37.339480 | O  | 17.167132 | 6.399745 | 43.455582 |
| C  | 14.635533 | 6.792069 | 36.454732 | O  | 16.641900 | 4.251549 | 43.902452 |
| C  | 14.678214 | 6.567903 | 35.088711 | C  | 16.857013 | 5.461687 | 44.273956 |
| C  | 15.443023 | 5.499515 | 34.568530 | Cu | 33.047998 | 6.084993 | 41.931283 |
| O  | 13.966285 | 7.454006 | 34.283440 | Cu | 32.381674 | 3.612985 | 42.411172 |
| O  | 17.248955 | 5.560603 | 39.580399 | C  | 36.544641 | 3.603770 | 42.144512 |
| O  | 16.724205 | 3.411762 | 40.022621 | C  | 37.087975 | 2.781561 | 43.112798 |
| C  | 16.957302 | 4.369274 | 39.200736 | C  | 38.474331 | 2.506853 | 43.107064 |
| C  | 12.972270 | 5.800971 | 41.346095 | C  | 39.290114 | 3.036451 | 42.130085 |
| C  | 12.500287 | 6.908971 | 42.040107 | C  | 38.767947 | 3.856012 | 41.075933 |

|   |           |          |           |    |           |          |           |
|---|-----------|----------|-----------|----|-----------|----------|-----------|
| C | 37.354159 | 4.132397 | 41.085376 | O  | 40.841419 | 2.198840 | 38.588718 |
| C | 36.802060 | 4.887515 | 40.012135 | O  | 31.048269 | 6.363011 | 41.794218 |
| C | 37.599557 | 5.358695 | 38.997252 | O  | 30.522586 | 4.247165 | 42.355583 |
| C | 39.002150 | 5.135962 | 39.005328 | C  | 30.225066 | 5.431487 | 42.010244 |
| C | 39.590098 | 4.391143 | 40.026505 | C  | 32.268409 | 5.685256 | 46.088216 |
| O | 39.775074 | 5.654126 | 38.009273 | C  | 33.220777 | 6.366125 | 46.824212 |
| O | 34.819623 | 5.196304 | 42.146307 | C  | 34.832375 | 6.770246 | 32.222753 |
| O | 34.260121 | 3.039280 | 42.441272 | C  | 33.804891 | 6.348362 | 33.057919 |
| C | 35.097313 | 3.970241 | 42.249309 | C  | 32.720662 | 5.605405 | 32.557819 |
| C | 32.658095 | 4.063914 | 38.186426 | C  | 31.015898 | 5.304437 | 46.671890 |
| C | 33.170722 | 2.839912 | 37.789651 | C  | 29.959450 | 4.728542 | 45.907063 |
| C | 33.243598 | 2.516691 | 36.419071 | C  | 28.738988 | 4.469711 | 46.486729 |
| C | 32.769484 | 3.396524 | 35.468135 | C  | 30.578687 | 4.500034 | 32.882526 |
| C | 32.186960 | 4.655486 | 35.822978 | C  | 31.657730 | 5.218809 | 33.406538 |
| C | 32.146442 | 4.996181 | 37.223831 | O  | 29.530386 | 4.128537 | 33.714684 |
| C | 31.546174 | 6.232135 | 37.604040 | O  | 32.889604 | 6.325550 | 43.903356 |
| C | 31.037155 | 7.087127 | 36.660445 | O  | 32.441505 | 4.153375 | 44.307433 |
| C | 31.086805 | 6.767806 | 35.276479 | C  | 32.558935 | 5.363626 | 44.655103 |
| C | 31.646470 | 5.567115 | 34.848112 | Cu | 48.399963 | 6.324745 | 41.575914 |
| O | 30.541058 | 7.736785 | 34.481586 | Cu | 48.001715 | 3.894445 | 42.066934 |
| O | 33.059222 | 5.514854 | 40.020807 | C  | 52.242279 | 4.464604 | 41.931330 |
| O | 32.342580 | 3.421418 | 40.432436 | C  | 52.828353 | 3.947581 | 43.079281 |
| C | 32.678560 | 4.362243 | 39.654165 | C  | 54.201353 | 3.732560 | 43.123179 |
| C | 28.766738 | 5.741059 | 41.880317 | C  | 54.987278 | 4.036564 | 42.018127 |
| C | 28.278824 | 6.852172 | 42.545004 | C  | 54.401204 | 4.554586 | 40.869175 |
| C | 42.223441 | 7.041360 | 42.125442 | C  | 53.028204 | 4.768608 | 40.826277 |
| C | 41.389577 | 6.166437 | 41.439642 | C  | 52.442129 | 5.287631 | 39.677326 |
| C | 41.910865 | 5.063746 | 40.735265 | C  | 53.229056 | 5.591635 | 38.571274 |
| C | 43.315336 | 4.835619 | 40.750223 | C  | 54.601055 | 5.377613 | 38.616174 |
| C | 28.400753 | 3.792754 | 40.356422 | C  | 55.187129 | 4.858591 | 39.764123 |
| C | 42.983441 | 2.918178 | 39.297690 | O  | 55.314972 | 5.617620 | 37.405126 |
| C | 41.612569 | 3.113772 | 39.300313 | O  | 50.339326 | 5.896497 | 41.713758 |
| C | 41.057024 | 4.192222 | 40.015993 | O  | 49.984501 | 3.717532 | 42.180298 |

|   |           |          |           |    |           |          |           |
|---|-----------|----------|-----------|----|-----------|----------|-----------|
| C | 50.767682 | 4.708589 | 41.950950 | O  | 47.920887 | 4.434662 | 43.979731 |
| C | 48.219858 | 4.299005 | 37.816717 | C  | 48.046485 | 5.657051 | 44.353235 |
| C | 48.981109 | 3.221428 | 37.328581 | C  | 9.830847  | 7.260907 | 57.522288 |
| C | 49.030200 | 2.940692 | 35.970067 | C  | 8.959814  | 6.502918 | 56.749313 |
| C | 48.317463 | 3.727647 | 35.072927 | C  | 9.429781  | 5.394919 | 56.054289 |
| C | 47.519294 | 4.802189 | 35.516293 | C  | 10.771781 | 5.042908 | 56.134240 |
| C | 47.454273 | 5.082432 | 36.908240 | C  | 10.370715 | 3.178922 | 54.666242 |
| C | 46.601093 | 6.111001 | 37.356256 | C  | 9.028715  | 3.528931 | 54.587292 |
| C | 45.871905 | 6.865883 | 36.445712 | C  | 8.558748  | 4.637930 | 55.281316 |
| C | 45.954276 | 6.626468 | 35.084083 | O  | 8.125681  | 2.792943 | 53.781318 |
| C | 46.784247 | 5.593143 | 34.593892 | Cu | 15.892890 | 6.156931 | 57.133781 |
| O | 45.209814 | 7.460182 | 34.252527 | Cu | 15.354562 | 3.738961 | 57.538918 |
| O | 48.434345 | 5.795791 | 39.661285 | C  | 19.612357 | 4.077974 | 57.370723 |
| O | 48.093042 | 3.609809 | 40.098026 | C  | 20.183563 | 3.269651 | 58.370635 |
| C | 48.249781 | 4.584871 | 39.277821 | C  | 21.537433 | 2.958080 | 58.348983 |
| C | 44.160779 | 5.711058 | 41.490206 | C  | 22.345301 | 3.440280 | 57.325132 |
| C | 43.594071 | 6.819790 | 42.146904 | C  | 21.813868 | 4.231842 | 56.289503 |
| C | 43.836285 | 3.762410 | 40.000752 | C  | 20.426858 | 4.540137 | 56.296930 |
| O | 46.416419 | 6.498645 | 41.468814 | C  | 19.886696 | 5.268244 | 55.215341 |
| O | 46.061147 | 4.312947 | 41.891795 | C  | 20.707374 | 5.717143 | 54.185289 |
| C | 45.632747 | 5.492166 | 41.617052 | C  | 22.075685 | 5.459473 | 54.201503 |
| C | 47.860173 | 5.987907 | 45.792034 | C  | 22.640860 | 4.706920 | 55.240124 |
| C | 48.823842 | 6.791834 | 46.428842 | O  | 22.883949 | 5.921392 | 53.168480 |
| C | 50.015894 | 7.142909 | 32.191606 | O  | 17.799485 | 5.625033 | 57.289024 |
| C | 48.956292 | 6.643627 | 32.941364 | O  | 17.324152 | 3.448734 | 57.644677 |
| C | 47.976101 | 5.819130 | 32.357029 | C  | 18.160106 | 4.403823 | 57.450481 |
| C | 46.723110 | 5.546775 | 46.524817 | C  | 15.656580 | 4.257637 | 53.307824 |
| C | 45.680748 | 4.820456 | 45.911089 | C  | 16.340053 | 3.134709 | 52.805814 |
| C | 44.583339 | 4.397121 | 46.654863 | C  | 16.372836 | 2.868688 | 51.444262 |
| C | 45.900839 | 4.551826 | 32.501312 | C  | 15.718224 | 3.714018 | 50.557063 |
| C | 46.885613 | 5.333605 | 33.120765 | C  | 14.999303 | 4.838229 | 51.012513 |
| O | 44.822887 | 4.087543 | 33.246758 | C  | 14.955328 | 5.108544 | 52.407731 |
| O | 48.306387 | 6.613777 | 43.539335 | C  | 14.182470 | 6.194410 | 52.866023 |

|   |           |          |           |    |           |          |           |
|---|-----------|----------|-----------|----|-----------|----------|-----------|
| C | 13.513929 | 7.011917 | 51.962727 | O  | 15.289653 | 4.210902 | 59.470132 |
| C | 13.575107 | 6.778099 | 50.598812 | C  | 15.449276 | 5.414169 | 59.890231 |
| C | 14.320245 | 5.686794 | 50.098187 | Cu | 31.448113 | 6.143117 | 57.120058 |
| O | 12.897289 | 7.675007 | 49.775886 | Cu | 30.925566 | 3.725399 | 57.541177 |
| O | 15.944695 | 5.686290 | 55.201370 | C  | 35.174971 | 4.050631 | 57.409732 |
| O | 15.445130 | 3.517185 | 55.563663 | C  | 35.710114 | 3.298963 | 58.472338 |
| C | 15.682921 | 4.502892 | 54.776933 | C  | 37.056582 | 2.959582 | 58.501298 |
| C | 11.644814 | 5.800897 | 56.909215 | C  | 37.894197 | 3.357333 | 57.465684 |
| C | 11.172847 | 6.908897 | 57.603238 | C  | 37.399897 | 4.092041 | 56.371228 |
| C | 25.284002 | 7.084277 | 57.652106 | C  | 36.020055 | 4.431542 | 56.330528 |
| C | 24.456142 | 6.309034 | 56.848148 | C  | 35.516094 | 5.104873 | 55.198531 |
| C | 24.973656 | 5.254547 | 56.067206 | C  | 36.367081 | 5.466694 | 54.158279 |
| C | 26.368036 | 4.985043 | 56.113150 | C  | 37.728029 | 5.173489 | 54.214594 |
| C | 11.243748 | 3.934910 | 55.440216 | C  | 38.257414 | 4.477394 | 55.310611 |
| C | 26.059501 | 3.244447 | 54.449560 | O  | 38.564371 | 5.542433 | 53.166898 |
| C | 24.692620 | 3.467879 | 54.426566 | O  | 33.364787 | 5.601808 | 57.229644 |
| C | 24.122554 | 4.472069 | 55.242425 | O  | 32.888593 | 3.436223 | 57.651413 |
| O | 23.934998 | 2.646626 | 53.594364 | C  | 33.723746 | 4.385126 | 57.434595 |
| O | 13.936271 | 6.440489 | 56.976653 | C  | 31.165274 | 4.225383 | 53.319567 |
| O | 13.443169 | 4.274893 | 57.363942 | C  | 32.009793 | 3.247074 | 52.827051 |
| C | 13.093367 | 5.479165 | 57.083849 | C  | 32.003129 | 2.955464 | 51.443979 |
| C | 15.283043 | 5.695832 | 61.352095 | C  | 31.162801 | 3.638307 | 50.592065 |
| C | 16.314084 | 6.385815 | 61.978046 | C  | 30.267264 | 4.639802 | 51.067269 |
| C | 17.702771 | 6.845366 | 47.684728 | C  | 30.248485 | 4.936314 | 52.477929 |
| C | 16.592742 | 6.476775 | 48.436319 | C  | 29.270443 | 5.870961 | 52.945284 |
| C | 15.518106 | 5.778130 | 47.853931 | C  | 28.344132 | 6.415146 | 52.091001 |
| C | 14.198078 | 5.242836 | 62.095148 | C  | 28.369064 | 6.129788 | 50.700870 |
| C | 13.166036 | 4.552853 | 61.469196 | C  | 29.371216 | 5.319835 | 50.165335 |
| C | 12.083071 | 4.099857 | 62.213249 | O  | 27.397926 | 6.696479 | 49.942453 |
| C | 13.312878 | 4.756238 | 48.008229 | O  | 31.436709 | 5.676614 | 55.187152 |
| C | 14.383050 | 5.420673 | 48.623229 | O  | 31.010547 | 3.485438 | 55.573409 |
| O | 12.193381 | 4.415685 | 48.759400 | C  | 31.209882 | 4.477117 | 54.777636 |
| O | 15.758860 | 6.386779 | 59.109924 | C  | 27.200482 | 5.750794 | 56.974639 |



|    |           |          |           |   |           |          |           |
|----|-----------|----------|-----------|---|-----------|----------|-----------|
| C  | 26.642934 | 6.809419 | 57.714526 | C | 53.073731 | 4.554370 | 56.431571 |
| C  | 40.902938 | 6.954447 | 57.606487 | C | 51.700732 | 4.768395 | 56.388697 |
| C  | 40.075327 | 6.133887 | 56.852058 | C | 51.114639 | 5.287425 | 55.239756 |
| C  | 40.590629 | 5.034352 | 56.135736 | C | 51.901546 | 5.591429 | 54.133692 |
| C  | 41.986683 | 4.764257 | 56.196417 | C | 53.273545 | 5.377401 | 54.178567 |
| C  | 26.897825 | 3.983268 | 55.276002 | C | 53.859638 | 4.858374 | 55.326505 |
| C  | 41.659914 | 2.901782 | 54.673973 | O | 53.987443 | 5.617408 | 52.967507 |
| C  | 40.295515 | 3.139284 | 54.626113 | O | 48.987960 | 5.858456 | 57.298264 |
| C  | 39.734531 | 4.209897 | 55.358421 | O | 48.670677 | 3.654117 | 57.664472 |
| O  | 39.531592 | 2.264099 | 53.857419 | C | 49.436070 | 4.671924 | 57.495906 |
| O  | 29.481692 | 6.434619 | 57.034138 | C | 46.938414 | 4.363080 | 53.310712 |
| O  | 29.012817 | 4.253776 | 57.376923 | C | 47.732293 | 3.322578 | 52.794747 |
| C  | 28.651117 | 5.461797 | 57.133941 | C | 47.767849 | 3.061326 | 51.432600 |
| C  | 30.903117 | 5.695647 | 61.351272 | C | 47.008162 | 3.830452 | 50.559724 |
| C  | 31.934172 | 6.385624 | 61.977208 | C | 46.183675 | 4.873678 | 51.030550 |
| C  | 32.986267 | 6.653536 | 48.187589 | C | 46.135230 | 5.135406 | 52.426564 |
| C  | 31.810846 | 6.258474 | 48.792817 | C | 45.261405 | 6.133211 | 52.902680 |
| C  | 30.792820 | 5.572942 | 48.065779 | C | 44.495122 | 6.877712 | 52.014430 |
| C  | 29.818163 | 5.242653 | 62.094343 | C | 44.557676 | 6.655358 | 50.648695 |
| C  | 28.786110 | 4.552676 | 61.468408 | C | 45.407690 | 5.651831 | 50.130881 |
| C  | 27.703155 | 4.099683 | 62.212479 | O | 43.780536 | 7.482386 | 49.840925 |
| C  | 28.534281 | 4.701215 | 47.871810 | O | 47.115104 | 5.799088 | 55.210962 |
| C  | 29.552246 | 5.185168 | 48.688796 | O | 46.804230 | 3.592149 | 55.558266 |
| O  | 27.314305 | 4.469540 | 48.439339 | C | 46.953117 | 4.600454 | 54.779284 |
| O  | 31.374750 | 6.377239 | 59.102033 | C | 42.826161 | 5.596124 | 56.990013 |
| O  | 30.878467 | 4.209109 | 59.470545 | C | 42.263382 | 6.692391 | 57.671299 |
| C  | 31.060757 | 5.410431 | 59.887298 | C | 42.506570 | 3.699724 | 55.434560 |
| Cu | 47.044737 | 6.248028 | 57.147671 | O | 45.068215 | 6.394153 | 57.019597 |
| Cu | 46.683019 | 3.792487 | 57.531295 | O | 44.735381 | 4.188993 | 57.351285 |
| C  | 50.914824 | 4.464393 | 57.493762 | C | 44.295777 | 5.374496 | 57.120377 |
| C  | 51.500917 | 3.947364 | 58.641701 | C | 46.523189 | 5.695410 | 61.350170 |
| C  | 52.873917 | 3.732338 | 58.685576 | C | 47.554256 | 6.385382 | 61.976090 |
| C  | 53.659825 | 4.036341 | 57.580511 | C | 48.701543 | 7.123757 | 47.771690 |

|   |           |          |           |   |           |          |           |
|---|-----------|----------|-----------|---|-----------|----------|-----------|
| C | 47.612192 | 6.664446 | 48.502683 | H | 22.116425 | 2.835979 | 28.240064 |
| C | 46.612606 | 5.874729 | 47.902384 | H | 24.511336 | 2.276571 | 28.286696 |
| C | 45.438246 | 5.242418 | 62.093259 | H | 25.997305 | 3.039206 | 26.506517 |
| C | 44.406178 | 4.552447 | 61.467340 | H | 21.501759 | 5.257050 | 24.071932 |
| C | 43.323236 | 4.099455 | 62.211428 | H | 22.995421 | 5.952262 | 22.306721 |
| C | 44.497118 | 4.673508 | 48.017142 | H | 19.532559 | 2.329838 | 22.589817 |
| C | 45.500631 | 5.418156 | 48.652396 | H | 19.679746 | 1.794368 | 20.190483 |
| O | 43.398068 | 4.238659 | 48.749105 | H | 18.480860 | 3.170986 | 18.536738 |
| O | 46.915979 | 6.443255 | 59.121699 | H | 16.654048 | 6.146427 | 22.827183 |
| O | 46.572658 | 4.238611 | 59.460841 | H | 15.507701 | 7.502086 | 21.163872 |
| C | 46.673421 | 5.443620 | 59.889965 | H | 14.495440 | 7.507876 | 27.087987 |
| C | 16.262157 | 6.620800 | 63.347051 | H | 27.554899 | 7.924087 | 26.980228 |
| C | 15.179191 | 6.168806 | 64.090104 | H | 26.078321 | 6.440723 | 25.733625 |
| C | 14.147152 | 5.478824 | 63.465153 | H | 14.941227 | 3.633089 | 24.313586 |
| C | 12.031146 | 4.336844 | 63.582254 | H | 29.112148 | 2.056633 | 23.142965 |
| C | 13.063186 | 5.025829 | 64.207206 | H | 19.762724 | 6.925998 | 30.330980 |
| O | 10.943182 | 3.908848 | 64.361307 | H | 15.678145 | 4.514880 | 29.273937 |
| C | 31.882272 | 6.620606 | 63.346214 | H | 13.770148 | 3.807475 | 30.575281 |
| C | 30.799319 | 6.168612 | 64.089285 | H | 15.672379 | 6.861994 | 17.596215 |
| C | 29.767263 | 5.478636 | 63.464349 | H | 25.121589 | 6.089291 | 21.478589 |
| C | 27.651256 | 4.336666 | 63.581485 | H | 25.594951 | 2.444635 | 22.920840 |
| C | 28.683310 | 5.025642 | 64.206420 | H | 37.722219 | 2.878521 | 28.306703 |
| O | 26.563304 | 3.908672 | 64.360557 | H | 40.106603 | 2.282707 | 28.376812 |
| C | 47.502383 | 6.620361 | 63.345099 | H | 41.599129 | 2.931379 | 26.558979 |
| C | 46.419440 | 6.168369 | 64.088187 | H | 37.142178 | 5.153356 | 24.057073 |
| C | 45.387372 | 5.478397 | 63.463268 | H | 38.644428 | 5.737771 | 22.254340 |
| C | 43.271361 | 4.336433 | 63.580436 | H | 35.147773 | 2.327072 | 22.590528 |
| C | 44.303429 | 5.025405 | 64.205357 | H | 35.298435 | 1.793452 | 20.190356 |
| O | 42.183423 | 3.908440 | 64.359527 | H | 34.100021 | 3.170534 | 18.536539 |
| H | 12.119161 | 8.126831 | 26.936091 | H | 32.268226 | 6.144807 | 22.826213 |
| H | 10.573006 | 6.786710 | 25.566637 | H | 31.125495 | 7.500495 | 21.163875 |
| H | 13.382328 | 2.322301 | 22.983028 | H | 29.961546 | 7.450302 | 27.134600 |
| H | 9.847423  | 3.169510 | 22.676405 | H | 43.106849 | 7.736693 | 27.026316 |

|   |           |          |           |   |           |          |           |
|---|-----------|----------|-----------|---|-----------|----------|-----------|
| H | 41.663999 | 6.241208 | 25.761433 | H | 20.415598 | 5.529239 | 39.680143 |
| H | 30.613412 | 3.489872 | 24.396038 | H | 22.047449 | 6.414371 | 38.139924 |
| H | 44.770340 | 1.877757 | 23.219412 | H | 18.103795 | 2.315452 | 37.895613 |
| H | 35.615613 | 6.787019 | 30.236143 | H | 18.090324 | 1.838195 | 35.483774 |
| H | 31.481698 | 4.300543 | 29.625489 | H | 16.894264 | 3.295223 | 33.940654 |
| H | 29.698422 | 3.640252 | 31.119699 | H | 15.252879 | 6.212546 | 38.396326 |
| H | 31.288763 | 6.859196 | 17.596527 | H | 14.038501 | 7.612551 | 36.829912 |
| H | 40.771544 | 5.802623 | 21.419791 | H | 13.169387 | 7.510054 | 42.646516 |
| H | 41.252922 | 2.240594 | 22.946556 | H | 26.508912 | 8.007469 | 43.047607 |
| H | 53.552137 | 3.699826 | 28.381271 | H | 24.974150 | 6.601872 | 41.769211 |
| H | 55.987719 | 3.325987 | 28.455683 | H | 13.611835 | 3.633431 | 39.869060 |
| H | 57.384051 | 3.866381 | 26.497950 | H | 27.933565 | 2.192343 | 38.997161 |
| H | 52.703583 | 5.454744 | 24.016451 | H | 18.639902 | 6.810532 | 45.764363 |
| H | 54.081457 | 5.977278 | 22.117122 | H | 19.561290 | 7.473970 | 32.719694 |
| H | 50.776969 | 2.334564 | 22.589419 | H | 17.636502 | 6.707689 | 34.008293 |
| H | 50.920580 | 1.795012 | 20.189812 | H | 14.441642 | 4.554044 | 44.825343 |
| H | 49.720365 | 3.170798 | 18.535983 | H | 12.520643 | 3.969539 | 46.170736 |
| H | 47.864296 | 6.135485 | 22.823720 | H | 12.737305 | 3.641950 | 32.608478 |
| H | 46.741603 | 7.497600 | 21.163657 | H | 14.005623 | 7.215987 | 33.307100 |
| H | 45.521588 | 7.316931 | 27.168792 | H | 24.232682 | 6.615986 | 37.495298 |
| H | 46.245677 | 3.331566 | 24.485050 | H | 24.541992 | 2.683432 | 38.633009 |
| H | 50.966621 | 7.203770 | 30.277570 | H | 36.440756 | 2.369466 | 43.891563 |
| H | 47.060949 | 4.477604 | 29.325650 | H | 38.902814 | 1.873138 | 43.890264 |
| H | 45.212211 | 3.680417 | 30.660286 | H | 40.360647 | 2.810569 | 42.161101 |
| H | 46.907584 | 6.858320 | 17.596187 | H | 35.733557 | 5.104882 | 39.990605 |
| H | 56.056786 | 5.973719 | 21.101979 | H | 37.153317 | 5.933011 | 38.175872 |
| H | 10.790872 | 8.127964 | 42.498587 | H | 33.528748 | 2.140162 | 38.548743 |
| H | 9.244520  | 6.787292 | 41.129779 | H | 33.675110 | 1.559615 | 36.109289 |
| H | 12.054201 | 2.324433 | 38.544124 | H | 32.840577 | 3.107504 | 34.414617 |
| H | 8.520615  | 3.174370 | 38.234517 | H | 31.482781 | 6.496222 | 38.660033 |
| H | 20.711600 | 2.655818 | 43.600768 | H | 30.566666 | 8.032017 | 36.946182 |
| H | 23.093970 | 2.080240 | 43.764537 | H | 28.966143 | 7.485383 | 43.112059 |
| H | 24.712550 | 3.040931 | 42.213516 | H | 41.802706 | 7.894121 | 42.648455 |

|                                |                                |
|--------------------------------|--------------------------------|
| H 40.326829 6.368135 41.451046 | H 7.917006 6.786887 56.693606  |
| H 29.462994 3.546485 40.387672 | H 10.726903 2.324683 54.106960 |
| H 43.390145 2.090840 38.730947 | H 7.192569 3.172857 53.799874  |
| H 34.155785 6.669156 46.343742 | H 19.568459 2.888113 59.177902 |
| H 35.654617 7.353430 32.625742 | H 21.966101 2.340270 59.131316 |
| H 33.858844 6.616802 34.105582 | H 23.394623 3.177946 57.340960 |
| H 30.106123 4.503003 44.848970 | H 18.828349 5.491088 55.139980 |
| H 27.918753 4.059677 45.888675 | H 20.268608 6.275605 53.369621 |
| H 28.826345 3.587918 33.233781 | H 16.857803 2.465300 53.483712 |
| H 30.568520 7.510153 33.538904 | H 16.908746 2.001315 51.072283 |
| H 39.214353 6.119570 37.367691 | H 15.764705 3.470281 49.505382 |
| H 39.852438 2.393594 38.629246 | H 14.069773 6.423320 53.919566 |
| H 52.223426 3.706219 43.946354 | H 12.929184 7.848140 52.322156 |
| H 54.659178 3.327005 44.019474 | H 11.840433 7.509792 58.211907 |
| H 56.055346 3.866418 42.061264 | H 24.867557 7.898884 58.235744 |
| H 51.374881 5.455348 39.580372 | H 23.403793 6.553155 56.828145 |
| H 52.752615 5.976726 37.680284 | H 12.284781 3.635338 55.429434 |
| H 49.550566 2.603565 38.014027 | H 26.473935 2.476881 53.809136 |
| H 49.626859 2.109648 35.608166 | H 17.168793 6.738849 61.411006 |
| H 48.380498 3.476527 34.023659 | H 18.516507 7.391607 48.150578 |
| H 46.470483 6.339740 38.407780 | H 16.573585 6.753477 49.481691 |
| H 45.222359 7.656382 36.797539 | H 13.133819 4.372040 60.400841 |
| H 44.227248 7.507693 42.696574 | H 11.278470 3.573158 61.719532 |
| H 44.900646 3.565478 39.933278 | H 11.506545 3.910918 48.219180 |
| H 49.679858 7.157309 45.872301 | H 12.966689 7.443227 48.799699 |
| H 50.753283 7.788455 32.657653 | H 22.376068 6.491997 52.509615 |
| H 48.898486 6.920196 33.985587 | H 22.954257 2.866122 53.612798 |
| H 45.689853 4.579817 44.853417 | H 35.069047 2.979880 59.286297 |
| H 43.797166 3.841150 46.162444 | H 37.454041 2.382757 59.330065 |
| H 44.197855 3.512012 32.702166 | H 38.936229 3.072324 57.517788 |
| H 45.288422 7.217039 33.279836 | H 34.462774 5.348166 55.093549 |
| H 54.726535 5.966285 36.662888 | H 35.956899 5.984050 53.301798 |
| H 9.463421 8.127169 58.062817  | H 32.683660 2.688540 53.485921 |

|   |           |          |           |   |           |          |           |
|---|-----------|----------|-----------|---|-----------|----------|-----------|
| H | 32.662046 | 2.174335 | 51.052267 | H | 44.382398 | 4.361986 | 60.399736 |
| H | 31.160858 | 3.389488 | 49.529351 | H | 42.519236 | 3.571622 | 61.717720 |
| H | 29.217086 | 6.141537 | 54.003980 | H | 42.760706 | 3.684768 | 48.196242 |
| H | 27.559603 | 7.082464 | 52.456878 | H | 43.832969 | 7.240881 | 48.866334 |
| H | 27.273574 | 7.413309 | 58.357666 | H | 53.398489 | 5.963910 | 52.224563 |
| H | 40.485949 | 7.801069 | 58.142059 | H | 17.068384 | 7.157736 | 63.836136 |
| H | 39.022819 | 6.376960 | 56.820647 | H | 15.148310 | 6.357045 | 65.155581 |
| H | 27.960635 | 3.766172 | 55.234408 | H | 10.262139 | 3.421942 | 63.798186 |
| H | 42.065723 | 2.080312 | 54.098699 | H | 32.688191 | 7.158119 | 63.835003 |
| H | 32.787148 | 6.739803 | 61.408511 | H | 30.768397 | 6.356730 | 65.154696 |
| H | 33.740033 | 7.197294 | 48.766209 | H | 25.880609 | 3.425393 | 63.796175 |
| H | 31.641311 | 6.493214 | 49.844630 | H | 48.307667 | 7.158864 | 63.833786 |
| H | 28.746629 | 4.376792 | 60.399763 | H | 46.387448 | 6.358028 | 65.153328 |
| H | 26.897814 | 3.574114 | 61.718588 | H | 41.497052 | 3.431033 | 63.794363 |
| H | 26.622549 | 4.212713 | 47.771687 | H | 54.922459 | 4.682604 | 55.325501 |
| H | 27.168040 | 6.049606 | 49.238248 | H | 56.250018 | 4.683007 | 39.763369 |
| H | 38.076766 | 6.058672 | 52.449771 | H | 57.578857 | 4.683485 | 24.200316 |
| H | 38.555645 | 2.506613 | 53.839447 | H | 32.654154 | 5.043609 | 18.026506 |
| H | 50.894658 | 3.699348 | 59.505914 | H | 17.034688 | 5.043879 | 18.026654 |
| H | 53.331500 | 3.325387 | 59.581284 | H | 10.176533 | 4.915018 | 24.089462 |
| H | 54.727811 | 3.865796 | 57.623315 | H | 8.847927  | 4.915211 | 39.653227 |
| H | 50.047827 | 5.461177 | 55.145837 | H | 7.520504  | 4.915235 | 55.216509 |
| H | 51.425187 | 5.978068 | 53.243281 | H | 12.998810 | 5.198730 | 65.269021 |
| H | 48.330827 | 2.713020 | 53.462707 | H | 28.618806 | 5.198511 | 65.268116 |
| H | 48.386015 | 2.256006 | 51.049442 | H | 44.238275 | 5.198802 | 65.266960 |
| H | 47.057698 | 3.589928 | 49.507460 | H | 48.273871 | 5.043411 | 18.026041 |
| H | 45.145558 | 6.347463 | 53.959057 | C | 22.884648 | 5.079798 | 47.466822 |
| H | 43.831227 | 7.646214 | 52.387594 | C | 24.373992 | 5.336293 | 47.525238 |
| H | 42.893978 | 7.346915 | 58.262893 | C | 25.124393 | 5.723395 | 46.314404 |
| H | 43.565845 | 3.472738 | 55.402002 | C | 24.442461 | 5.869382 | 44.966094 |
| H | 48.405407 | 6.744820 | 61.407784 | C | 22.906188 | 5.829465 | 45.052413 |
| H | 49.455169 | 7.740622 | 48.250464 | C | 22.405208 | 4.767559 | 46.040384 |
| H | 47.547810 | 6.944242 | 49.545495 | O | 25.198720 | 4.373272 | 46.834728 |



|    |           |          |           |   |           |          |           |
|----|-----------|----------|-----------|---|-----------|----------|-----------|
| C  | 27.966528 | 7.051758 | 26.483030 | O | 36.044931 | 5.467760 | 26.187696 |
| C  | 27.131058 | 6.198881 | 25.770703 | O | 35.545310 | 3.316565 | 26.649179 |
| C  | 27.640691 | 5.069379 | 25.098257 | C | 36.391546 | 4.252560 | 26.418840 |
| C  | 29.034707 | 4.800106 | 25.164982 | C | 33.846853 | 4.021969 | 22.293716 |
| C  | 13.900000 | 3.935000 | 24.313000 | C | 34.612830 | 2.940966 | 21.873681 |
| C  | 28.706723 | 2.892328 | 23.697696 | C | 34.701779 | 2.637975 | 20.519676 |
| C  | 27.341572 | 3.120084 | 23.657666 | C | 34.024751 | 3.416985 | 19.587706 |
| C  | 26.782975 | 4.211684 | 24.359730 | C | 33.259774 | 4.496987 | 20.007739 |
| O  | 26.575122 | 2.219336 | 22.921445 | C | 33.170824 | 4.799980 | 21.361745 |
| O  | 16.597542 | 6.403167 | 25.853699 | C | 32.403846 | 5.880983 | 21.783779 |
| O  | 16.056233 | 4.263416 | 26.319556 | C | 31.727819 | 6.658993 | 20.849808 |
| C  | 15.736620 | 5.461753 | 25.985866 | C | 31.817769 | 6.355001 | 19.496803 |
| C  | 17.906535 | 5.817457 | 30.234791 | C | 32.583746 | 5.273997 | 19.075769 |
| C  | 18.894319 | 6.582246 | 30.882075 | O | 31.143739 | 7.185012 | 18.538833 |
| C  | 16.754362 | 5.404587 | 30.961996 | O | 34.121248 | 5.512664 | 24.152966 |
| C  | 15.684120 | 4.729172 | 30.337285 | O | 33.631044 | 3.355331 | 24.584281 |
| C  | 14.575875 | 4.326476 | 31.076435 | C | 33.856409 | 4.318205 | 23.763140 |
| O  | 18.432915 | 6.401630 | 27.981558 | C | 29.876192 | 5.648583 | 25.938714 |
| O  | 17.897799 | 4.256947 | 28.433372 | C | 29.325970 | 6.781763 | 26.564838 |
| C  | 18.096348 | 5.470965 | 28.799269 | C | 43.535124 | 6.873148 | 26.527664 |
| Cu | 34.136340 | 6.025557 | 26.076638 | C | 42.719170 | 6.012265 | 25.805002 |
| Cu | 33.584103 | 3.625683 | 26.563096 | C | 43.249992 | 4.891207 | 25.134132 |
| C  | 37.839027 | 3.904609 | 26.404577 | C | 44.647795 | 4.639954 | 25.211281 |
| C  | 38.366726 | 3.176574 | 27.487106 | C | 29.553528 | 3.714115 | 24.430861 |
| C  | 39.712958 | 2.837862 | 27.531449 | C | 44.351943 | 2.716544 | 23.759565 |
| C  | 40.556548 | 3.211531 | 26.491775 | C | 42.985308 | 2.936168 | 23.696040 |
| C  | 40.068152 | 3.918256 | 25.376636 | C | 42.408782 | 4.027859 | 24.383353 |
| C  | 38.689289 | 4.257046 | 25.320054 | O | 42.235125 | 2.024284 | 22.956971 |
| C  | 38.192527 | 4.905150 | 24.170223 | O | 32.167427 | 6.327119 | 25.985084 |
| C  | 39.048338 | 5.238778 | 23.124636 | O | 31.681682 | 4.167563 | 26.415259 |
| C  | 40.408854 | 4.947102 | 23.196246 | C | 31.327181 | 5.365772 | 26.123827 |
| C  | 40.931314 | 4.279916 | 24.313002 | C | 33.759079 | 5.677045 | 30.328447 |
| O  | 41.252643 | 5.294875 | 22.147178 | C | 34.805783 | 6.446233 | 30.872377 |

|    |           |          |           |    |           |          |           |
|----|-----------|----------|-----------|----|-----------|----------|-----------|
| C  | 32.690464 | 5.263671 | 31.175960 | O  | 49.725059 | 5.588715 | 24.095214 |
| C  | 31.577149 | 4.558327 | 30.675386 | O  | 49.386251 | 3.420849 | 24.607756 |
| C  | 30.541268 | 4.182336 | 31.526875 | C  | 49.523214 | 4.366323 | 23.751286 |
| O  | 34.090500 | 6.300919 | 28.049397 | C  | 45.474186 | 5.514003 | 25.971044 |
| O  | 33.573240 | 4.150463 | 28.487974 | C  | 44.898771 | 6.630681 | 26.605649 |
| C  | 33.806104 | 5.354898 | 28.869558 | C  | 45.184125 | 3.550902 | 24.496588 |
| Cu | 49.689524 | 6.197107 | 25.991956 | O  | 47.709181 | 6.325062 | 25.895638 |
| Cu | 49.345031 | 3.777034 | 26.565009 | O  | 47.393076 | 4.154907 | 26.421469 |
| C  | 53.571003 | 4.464794 | 26.367934 | C  | 46.944816 | 5.315309 | 26.100137 |
| C  | 54.157057 | 3.947776 | 27.515897 | C  | 49.192289 | 5.966345 | 30.228543 |
| C  | 55.530059 | 3.732762 | 27.559821 | C  | 50.131478 | 6.811527 | 30.847255 |
| C  | 56.316002 | 4.036764 | 26.454782 | C  | 48.080988 | 5.488972 | 30.979280 |
| C  | 55.729945 | 4.554783 | 25.305818 | C  | 47.057146 | 4.723133 | 30.382246 |
| C  | 54.356946 | 4.768798 | 25.262894 | C  | 45.983678 | 4.266659 | 31.140774 |
| C  | 53.770889 | 5.287815 | 24.113932 | O  | 49.600942 | 6.549949 | 27.950181 |
| C  | 54.557833 | 5.591817 | 23.007892 | O  | 49.296359 | 4.373113 | 28.459161 |
| C  | 55.929833 | 5.377802 | 23.052816 | C  | 49.382498 | 5.608814 | 28.795532 |
| C  | 56.515888 | 4.858784 | 24.200779 | C  | 11.158287 | 7.260976 | 41.959132 |
| O  | 56.643769 | 5.617808 | 21.841779 | C  | 10.287269 | 6.502982 | 41.186144 |
| O  | 51.633385 | 5.833718 | 26.127071 | C  | 10.757253 | 5.394981 | 40.491132 |
| O  | 51.336466 | 3.655106 | 26.634966 | C  | 12.099253 | 5.042976 | 40.571108 |
| C  | 52.092183 | 4.663324 | 26.381411 | C  | 11.698221 | 3.178982 | 39.103110 |
| C  | 49.466778 | 4.021877 | 22.293151 | C  | 10.356221 | 3.528988 | 39.024135 |
| C  | 50.232744 | 2.940873 | 21.873099 | C  | 9.886237  | 4.637987 | 39.718145 |
| C  | 50.321667 | 2.637886 | 20.519091 | O  | 9.453203  | 2.792994 | 38.218148 |
| C  | 49.644624 | 3.416901 | 19.587136 | Cu | 17.245085 | 6.098385 | 41.492382 |
| C  | 48.879658 | 4.496905 | 20.007187 | Cu | 16.667150 | 3.706620 | 41.989849 |
| C  | 48.790735 | 4.799894 | 21.361195 | C  | 20.944972 | 3.972125 | 41.896673 |
| C  | 48.023770 | 5.880898 | 21.783247 | C  | 21.407649 | 3.085296 | 42.888309 |
| C  | 47.347728 | 6.658913 | 20.849290 | C  | 22.754328 | 2.758965 | 42.987995 |
| C  | 47.437652 | 6.354926 | 19.496283 | C  | 23.669679 | 3.310201 | 42.099994 |
| C  | 48.203617 | 5.273922 | 19.075230 | C  | 23.254155 | 4.172473 | 41.069908 |
| O  | 46.763610 | 7.184943 | 18.538326 | C  | 21.873918 | 4.497463 | 40.950394 |



|   |           |          |           |    |           |          |           |
|---|-----------|----------|-----------|----|-----------|----------|-----------|
| C | 21.458848 | 5.297902 | 39.864979 | O  | 15.282302 | 6.414295 | 41.363474 |
| C | 22.390998 | 5.800904 | 38.961987 | O  | 14.761347 | 4.269972 | 41.822693 |
| C | 23.745809 | 5.516541 | 39.102247 | C  | 14.424123 | 5.470809 | 41.513815 |
| C | 24.186042 | 4.694643 | 40.143863 | C  | 16.726969 | 5.799000 | 45.717570 |
| O | 24.661690 | 6.017146 | 38.185687 | C  | 17.767925 | 6.514968 | 46.337434 |
| O | 19.147757 | 5.535880 | 41.648179 | C  | 18.785893 | 6.892377 | 32.231598 |
| O | 18.633566 | 3.386551 | 42.090092 | C  | 17.686230 | 6.450742 | 32.958755 |
| C | 19.489967 | 4.319386 | 41.875476 | C  | 16.658601 | 5.708038 | 32.346142 |
| C | 16.875190 | 4.090603 | 37.741706 | C  | 15.575228 | 5.444499 | 46.474034 |
| C | 17.557336 | 2.972687 | 37.228497 | C  | 14.469020 | 4.799763 | 45.881824 |
| C | 17.555080 | 2.700970 | 35.866920 | C  | 13.355495 | 4.465475 | 46.646740 |
| C | 16.870760 | 3.538747 | 34.993475 | C  | 14.502474 | 4.578578 | 32.443903 |
| C | 16.147303 | 4.653536 | 35.465337 | C  | 15.531899 | 5.276872 | 33.089416 |
| C | 16.129877 | 4.921375 | 36.860230 | O  | 13.390580 | 4.167269 | 33.170469 |
| C | 15.344429 | 5.989047 | 37.339480 | O  | 17.167132 | 6.399745 | 43.455582 |
| C | 14.635533 | 6.792069 | 36.454732 | O  | 16.641900 | 4.251549 | 43.902452 |
| C | 14.678214 | 6.567903 | 35.088711 | C  | 16.857013 | 5.461687 | 44.273956 |
| C | 15.443023 | 5.499515 | 34.568530 | Cu | 33.047998 | 6.084993 | 41.931283 |
| O | 13.966285 | 7.454006 | 34.283440 | Cu | 32.381674 | 3.612985 | 42.411172 |
| O | 17.248955 | 5.560603 | 39.580399 | C  | 36.544641 | 3.603770 | 42.144512 |
| O | 16.724205 | 3.411762 | 40.022621 | C  | 37.087975 | 2.781561 | 43.112798 |
| C | 16.957302 | 4.369274 | 39.200736 | C  | 38.474331 | 2.506853 | 43.107064 |
| C | 12.972270 | 5.800971 | 41.346095 | C  | 39.290114 | 3.036451 | 42.130085 |
| C | 12.500287 | 6.908971 | 42.040107 | C  | 38.767947 | 3.856012 | 41.075933 |
| C | 26.898567 | 7.141350 | 42.502684 | C  | 37.354159 | 4.132397 | 41.085376 |
| C | 26.037884 | 6.342993 | 41.777227 | C  | 36.802060 | 4.887515 | 40.012135 |
| C | 26.498828 | 5.206434 | 41.037822 | C  | 37.599557 | 5.358695 | 38.997252 |
| C | 27.904814 | 4.899475 | 41.106659 | C  | 39.002150 | 5.135962 | 39.005328 |
| C | 12.571237 | 3.934977 | 39.877096 | C  | 39.590098 | 4.391143 | 40.026505 |
| C | 27.558724 | 3.032778 | 39.587413 | O  | 39.775074 | 5.654126 | 38.009273 |
| C | 26.168549 | 3.319395 | 39.520461 | O  | 34.819623 | 5.196304 | 42.146307 |
| C | 25.630760 | 4.385173 | 40.236655 | O  | 34.260121 | 3.039280 | 42.441272 |
| O | 25.482123 | 2.458912 | 38.711539 | C  | 35.097313 | 3.970241 | 42.249309 |

|   |           |          |           |    |           |          |           |
|---|-----------|----------|-----------|----|-----------|----------|-----------|
| C | 32.658095 | 4.063914 | 38.186426 | C  | 31.015898 | 5.304437 | 46.671890 |
| C | 33.170722 | 2.839912 | 37.789651 | C  | 29.959450 | 4.728542 | 45.907063 |
| C | 33.243598 | 2.516691 | 36.419071 | C  | 28.738988 | 4.469711 | 46.486729 |
| C | 32.769484 | 3.396524 | 35.468135 | C  | 30.578687 | 4.500034 | 32.882526 |
| C | 32.186960 | 4.655486 | 35.822978 | C  | 31.657730 | 5.218809 | 33.406538 |
| C | 32.146442 | 4.996181 | 37.223831 | O  | 29.530386 | 4.128537 | 33.714684 |
| C | 31.546174 | 6.232135 | 37.604040 | O  | 32.889604 | 6.325550 | 43.903356 |
| C | 31.037155 | 7.087127 | 36.660445 | O  | 32.441505 | 4.153375 | 44.307433 |
| C | 31.086805 | 6.767806 | 35.276479 | C  | 32.558935 | 5.363626 | 44.655103 |
| C | 31.646470 | 5.567115 | 34.848112 | Cu | 48.399963 | 6.324745 | 41.575914 |
| O | 30.541058 | 7.736785 | 34.481586 | Cu | 48.001715 | 3.894445 | 42.066934 |
| O | 33.059222 | 5.514854 | 40.020807 | C  | 52.242279 | 4.464604 | 41.931330 |
| O | 32.342580 | 3.421418 | 40.432436 | C  | 52.828353 | 3.947581 | 43.079281 |
| C | 32.678560 | 4.362243 | 39.654165 | C  | 54.201353 | 3.732560 | 43.123179 |
| C | 28.766738 | 5.741059 | 41.880317 | C  | 54.987278 | 4.036564 | 42.018127 |
| C | 28.278824 | 6.852172 | 42.545004 | C  | 54.401204 | 4.554586 | 40.869175 |
| C | 42.223441 | 7.041360 | 42.125442 | C  | 53.028204 | 4.768608 | 40.826277 |
| C | 41.389577 | 6.166437 | 41.439642 | C  | 52.442129 | 5.287631 | 39.677326 |
| C | 41.910865 | 5.063746 | 40.735265 | C  | 53.229056 | 5.591635 | 38.571274 |
| C | 43.315336 | 4.835619 | 40.750223 | C  | 54.601055 | 5.377613 | 38.616174 |
| C | 28.400753 | 3.792754 | 40.356422 | C  | 55.187129 | 4.858591 | 39.764123 |
| C | 42.983441 | 2.918178 | 39.297690 | O  | 55.314972 | 5.617620 | 37.405126 |
| C | 41.612569 | 3.113772 | 39.300313 | O  | 50.339326 | 5.896497 | 41.713758 |
| C | 41.057024 | 4.192222 | 40.015993 | O  | 49.984501 | 3.717532 | 42.180298 |
| O | 40.841419 | 2.198840 | 38.588718 | C  | 50.767682 | 4.708589 | 41.950950 |
| O | 31.048269 | 6.363011 | 41.794218 | C  | 48.219858 | 4.299005 | 37.816717 |
| O | 30.522586 | 4.247165 | 42.355583 | C  | 48.981109 | 3.221428 | 37.328581 |
| C | 30.225066 | 5.431487 | 42.010244 | C  | 49.030200 | 2.940692 | 35.970067 |
| C | 32.268409 | 5.685256 | 46.088216 | C  | 48.317463 | 3.727647 | 35.072927 |
| C | 33.220777 | 6.366125 | 46.824212 | C  | 47.519294 | 4.802189 | 35.516293 |
| C | 34.832375 | 6.770246 | 32.222753 | C  | 47.454273 | 5.082432 | 36.908240 |
| C | 33.804891 | 6.348362 | 33.057919 | C  | 46.601093 | 6.111001 | 37.356256 |
| C | 32.720662 | 5.605405 | 32.557819 | C  | 45.871905 | 6.865883 | 36.445712 |

|   |           |          |           |    |           |          |           |
|---|-----------|----------|-----------|----|-----------|----------|-----------|
| C | 45.954276 | 6.626468 | 35.084083 | O  | 8.125681  | 2.792943 | 53.781318 |
| C | 46.784247 | 5.593143 | 34.593892 | Cu | 15.892890 | 6.156931 | 57.133781 |
| O | 45.209814 | 7.460182 | 34.252527 | Cu | 15.354562 | 3.738961 | 57.538918 |
| O | 48.434345 | 5.795791 | 39.661285 | C  | 19.612357 | 4.077974 | 57.370723 |
| O | 48.093042 | 3.609809 | 40.098026 | C  | 20.183563 | 3.269651 | 58.370635 |
| C | 48.249781 | 4.584871 | 39.277821 | C  | 21.537433 | 2.958080 | 58.348983 |
| C | 44.160779 | 5.711058 | 41.490206 | C  | 22.345301 | 3.440280 | 57.325132 |
| C | 43.594071 | 6.819790 | 42.146904 | C  | 21.813868 | 4.231842 | 56.289503 |
| C | 43.836285 | 3.762410 | 40.000752 | C  | 20.426858 | 4.540137 | 56.296930 |
| O | 46.416419 | 6.498645 | 41.468814 | C  | 19.886696 | 5.268244 | 55.215341 |
| O | 46.061147 | 4.312947 | 41.891795 | C  | 20.707374 | 5.717143 | 54.185289 |
| C | 45.632747 | 5.492166 | 41.617052 | C  | 22.075685 | 5.459473 | 54.201503 |
| C | 47.860173 | 5.987907 | 45.792034 | C  | 22.640860 | 4.706920 | 55.240124 |
| C | 48.823842 | 6.791834 | 46.428842 | O  | 22.883949 | 5.921392 | 53.168480 |
| C | 50.015894 | 7.142909 | 32.191606 | O  | 17.799485 | 5.625033 | 57.289024 |
| C | 48.956292 | 6.643627 | 32.941364 | O  | 17.324152 | 3.448734 | 57.644677 |
| C | 47.976101 | 5.819130 | 32.357029 | C  | 18.160106 | 4.403823 | 57.450481 |
| C | 46.723110 | 5.546775 | 46.524817 | C  | 15.656580 | 4.257637 | 53.307824 |
| C | 45.680748 | 4.820456 | 45.911089 | C  | 16.340053 | 3.134709 | 52.805814 |
| C | 44.583339 | 4.397121 | 46.654863 | C  | 16.372836 | 2.868688 | 51.444262 |
| C | 45.900839 | 4.551826 | 32.501312 | C  | 15.718224 | 3.714018 | 50.557063 |
| C | 46.885613 | 5.333605 | 33.120765 | C  | 14.999303 | 4.838229 | 51.012513 |
| O | 44.822887 | 4.087543 | 33.246758 | C  | 14.955328 | 5.108544 | 52.407731 |
| O | 48.306387 | 6.613777 | 43.539335 | C  | 14.182470 | 6.194410 | 52.866023 |
| O | 47.920887 | 4.434662 | 43.979731 | C  | 13.513929 | 7.011917 | 51.962727 |
| C | 48.046485 | 5.657051 | 44.353235 | C  | 13.575107 | 6.778099 | 50.598812 |
| C | 9.830847  | 7.260907 | 57.522288 | C  | 14.320245 | 5.686794 | 50.098187 |
| C | 8.959814  | 6.502918 | 56.749313 | O  | 12.897289 | 7.675007 | 49.775886 |
| C | 9.429781  | 5.394919 | 56.054289 | O  | 15.944695 | 5.686290 | 55.201370 |
| C | 10.771781 | 5.042908 | 56.134240 | O  | 15.445130 | 3.517185 | 55.563663 |
| C | 10.370715 | 3.178922 | 54.666242 | C  | 15.682921 | 4.502892 | 54.776933 |
| C | 9.028715  | 3.528931 | 54.587292 | C  | 11.644814 | 5.800897 | 56.909215 |
| C | 8.558748  | 4.637930 | 55.281316 | C  | 11.172847 | 6.908897 | 57.603238 |

|    |           |          |           |   |           |          |           |
|----|-----------|----------|-----------|---|-----------|----------|-----------|
| C  | 25.284002 | 7.084277 | 57.652106 | C | 36.020055 | 4.431542 | 56.330528 |
| C  | 24.456142 | 6.309034 | 56.848148 | C | 35.516094 | 5.104873 | 55.198531 |
| C  | 24.973656 | 5.254547 | 56.067206 | C | 36.367081 | 5.466694 | 54.158279 |
| C  | 26.368036 | 4.985043 | 56.113150 | C | 37.728029 | 5.173489 | 54.214594 |
| C  | 11.243748 | 3.934910 | 55.440216 | C | 38.257414 | 4.477394 | 55.310611 |
| C  | 26.059501 | 3.244447 | 54.449560 | O | 38.564371 | 5.542433 | 53.166898 |
| C  | 24.692620 | 3.467879 | 54.426566 | O | 33.364787 | 5.601808 | 57.229644 |
| C  | 24.122554 | 4.472069 | 55.242425 | O | 32.888593 | 3.436223 | 57.651413 |
| O  | 23.934998 | 2.646626 | 53.594364 | C | 33.723746 | 4.385126 | 57.434595 |
| O  | 13.936271 | 6.440489 | 56.976653 | C | 31.165274 | 4.225383 | 53.319567 |
| O  | 13.443169 | 4.274893 | 57.363942 | C | 32.009793 | 3.247074 | 52.827051 |
| C  | 13.093367 | 5.479165 | 57.083849 | C | 32.003129 | 2.955464 | 51.443979 |
| C  | 15.283043 | 5.695832 | 61.352095 | C | 31.162801 | 3.638307 | 50.592065 |
| C  | 16.314084 | 6.385815 | 61.978046 | C | 30.267264 | 4.639802 | 51.067269 |
| C  | 17.702771 | 6.845366 | 47.684728 | C | 30.248485 | 4.936314 | 52.477929 |
| C  | 16.592742 | 6.476775 | 48.436319 | C | 29.270443 | 5.870961 | 52.945284 |
| C  | 15.518106 | 5.778130 | 47.853931 | C | 28.344132 | 6.415146 | 52.091001 |
| C  | 14.198078 | 5.242836 | 62.095148 | C | 28.369064 | 6.129788 | 50.700870 |
| C  | 13.166036 | 4.552853 | 61.469196 | C | 29.371216 | 5.319835 | 50.165335 |
| C  | 12.083071 | 4.099857 | 62.213249 | O | 27.397926 | 6.696479 | 49.942453 |
| C  | 13.312878 | 4.756238 | 48.008229 | O | 31.436709 | 5.676614 | 55.187152 |
| C  | 14.383050 | 5.420673 | 48.623229 | O | 31.010547 | 3.485438 | 55.573409 |
| O  | 12.193381 | 4.415685 | 48.759400 | C | 31.209882 | 4.477117 | 54.777636 |
| O  | 15.758860 | 6.386779 | 59.109924 | C | 27.200482 | 5.750794 | 56.974639 |
| O  | 15.289653 | 4.210902 | 59.470132 | C | 26.642934 | 6.809419 | 57.714526 |
| C  | 15.449276 | 5.414169 | 59.890231 | C | 40.902938 | 6.954447 | 57.606487 |
| Cu | 31.448113 | 6.143117 | 57.120058 | C | 40.075327 | 6.133887 | 56.852058 |
| Cu | 30.925566 | 3.725399 | 57.541177 | C | 40.590629 | 5.034352 | 56.135736 |
| C  | 35.174971 | 4.050631 | 57.409732 | C | 41.986683 | 4.764257 | 56.196417 |
| C  | 35.710114 | 3.298963 | 58.472338 | C | 26.897825 | 3.983268 | 55.276002 |
| C  | 37.056582 | 2.959582 | 58.501298 | C | 41.659914 | 2.901782 | 54.673973 |
| C  | 37.894197 | 3.357333 | 57.465684 | C | 40.295515 | 3.139284 | 54.626113 |
| C  | 37.399897 | 4.092041 | 56.371228 | C | 39.734531 | 4.209897 | 55.358421 |

|    |           |          |           |   |           |          |           |
|----|-----------|----------|-----------|---|-----------|----------|-----------|
| O  | 39.531592 | 2.264099 | 53.857419 | C | 49.436070 | 4.671924 | 57.495906 |
| O  | 29.481692 | 6.434619 | 57.034138 | C | 46.938414 | 4.363080 | 53.310712 |
| O  | 29.012817 | 4.253776 | 57.376923 | C | 47.732293 | 3.322578 | 52.794747 |
| C  | 28.651117 | 5.461797 | 57.133941 | C | 47.767849 | 3.061326 | 51.432600 |
| C  | 30.903117 | 5.695647 | 61.351272 | C | 47.008162 | 3.830452 | 50.559724 |
| C  | 31.934172 | 6.385624 | 61.977208 | C | 46.183675 | 4.873678 | 51.030550 |
| C  | 32.986267 | 6.653536 | 48.187589 | C | 46.135230 | 5.135406 | 52.426564 |
| C  | 31.810846 | 6.258474 | 48.792817 | C | 45.261405 | 6.133211 | 52.902680 |
| C  | 30.792820 | 5.572942 | 48.065779 | C | 44.495122 | 6.877712 | 52.014430 |
| C  | 29.818163 | 5.242653 | 62.094343 | C | 44.557676 | 6.655358 | 50.648695 |
| C  | 28.786110 | 4.552676 | 61.468408 | C | 45.407690 | 5.651831 | 50.130881 |
| C  | 27.703155 | 4.099683 | 62.212479 | O | 43.780536 | 7.482386 | 49.840925 |
| C  | 28.534281 | 4.701215 | 47.871810 | O | 47.115104 | 5.799088 | 55.210962 |
| C  | 29.552246 | 5.185168 | 48.688796 | O | 46.804230 | 3.592149 | 55.558266 |
| O  | 27.314305 | 4.469540 | 48.439339 | C | 46.953117 | 4.600454 | 54.779284 |
| O  | 31.374750 | 6.377239 | 59.102033 | C | 42.826161 | 5.596124 | 56.990013 |
| O  | 30.878467 | 4.209109 | 59.470545 | C | 42.263382 | 6.692391 | 57.671299 |
| C  | 31.060757 | 5.410431 | 59.887298 | C | 42.506570 | 3.699724 | 55.434560 |
| Cu | 47.044737 | 6.248028 | 57.147671 | O | 45.068215 | 6.394153 | 57.019597 |
| Cu | 46.683019 | 3.792487 | 57.531295 | O | 44.735381 | 4.188993 | 57.351285 |
| C  | 50.914824 | 4.464393 | 57.493762 | C | 44.295777 | 5.374496 | 57.120377 |
| C  | 51.500917 | 3.947364 | 58.641701 | C | 46.523189 | 5.695410 | 61.350170 |
| C  | 52.873917 | 3.732338 | 58.685576 | C | 47.554256 | 6.385382 | 61.976090 |
| C  | 53.659825 | 4.036341 | 57.580511 | C | 48.701543 | 7.123757 | 47.771690 |
| C  | 53.073731 | 4.554370 | 56.431571 | C | 47.612192 | 6.664446 | 48.502683 |
| C  | 51.700732 | 4.768395 | 56.388697 | C | 46.612606 | 5.874729 | 47.902384 |
| C  | 51.114639 | 5.287425 | 55.239756 | C | 45.438246 | 5.242418 | 62.093259 |
| C  | 51.901546 | 5.591429 | 54.133692 | C | 44.406178 | 4.552447 | 61.467340 |
| C  | 53.273545 | 5.377401 | 54.178567 | C | 43.323236 | 4.099455 | 62.211428 |
| C  | 53.859638 | 4.858374 | 55.326505 | C | 44.497118 | 4.673508 | 48.017142 |
| O  | 53.987443 | 5.617408 | 52.967507 | C | 45.500631 | 5.418156 | 48.652396 |
| O  | 48.987960 | 5.858456 | 57.298264 | O | 43.398068 | 4.238659 | 48.749105 |
| O  | 48.670677 | 3.654117 | 57.664472 | O | 46.915979 | 6.443255 | 59.121699 |

|   |           |          |           |   |           |          |           |
|---|-----------|----------|-----------|---|-----------|----------|-----------|
| O | 46.572658 | 4.238611 | 59.460841 | H | 15.507701 | 7.502086 | 21.163872 |
| C | 46.673421 | 5.443620 | 59.889965 | H | 14.495440 | 7.507876 | 27.087987 |
| C | 16.262157 | 6.620800 | 63.347051 | H | 27.554899 | 7.924087 | 26.980228 |
| C | 15.179191 | 6.168806 | 64.090104 | H | 26.078321 | 6.440723 | 25.733625 |
| C | 14.147152 | 5.478824 | 63.465153 | H | 14.941227 | 3.633089 | 24.313586 |
| C | 12.031146 | 4.336844 | 63.582254 | H | 29.112148 | 2.056633 | 23.142965 |
| C | 13.063186 | 5.025829 | 64.207206 | H | 19.762724 | 6.925998 | 30.330980 |
| O | 10.943182 | 3.908848 | 64.361307 | H | 15.678145 | 4.514880 | 29.273937 |
| C | 31.882272 | 6.620606 | 63.346214 | H | 13.770148 | 3.807475 | 30.575281 |
| C | 30.799319 | 6.168612 | 64.089285 | H | 15.672379 | 6.861994 | 17.596215 |
| C | 29.767263 | 5.478636 | 63.464349 | H | 25.121589 | 6.089291 | 21.478589 |
| C | 27.651256 | 4.336666 | 63.581485 | H | 25.594951 | 2.444635 | 22.920840 |
| C | 28.683310 | 5.025642 | 64.206420 | H | 37.722219 | 2.878521 | 28.306703 |
| O | 26.563304 | 3.908672 | 64.360557 | H | 40.106603 | 2.282707 | 28.376812 |
| C | 47.502383 | 6.620361 | 63.345099 | H | 41.599129 | 2.931379 | 26.558979 |
| C | 46.419440 | 6.168369 | 64.088187 | H | 37.142178 | 5.153356 | 24.057073 |
| C | 45.387372 | 5.478397 | 63.463268 | H | 38.644428 | 5.737771 | 22.254340 |
| C | 43.271361 | 4.336433 | 63.580436 | H | 35.147773 | 2.327072 | 22.590528 |
| C | 44.303429 | 5.025405 | 64.205357 | H | 35.298435 | 1.793452 | 20.190356 |
| O | 42.183423 | 3.908440 | 64.359527 | H | 34.100021 | 3.170534 | 18.536539 |
| H | 12.119161 | 8.126831 | 26.936091 | H | 32.268226 | 6.144807 | 22.826213 |
| H | 10.573006 | 6.786710 | 25.566637 | H | 31.125495 | 7.500495 | 21.163875 |
| H | 13.382328 | 2.322301 | 22.983028 | H | 29.961546 | 7.450302 | 27.134600 |
| H | 9.847423  | 3.169510 | 22.676405 | H | 43.106849 | 7.736693 | 27.026316 |
| H | 22.116425 | 2.835979 | 28.240064 | H | 41.663999 | 6.241208 | 25.761433 |
| H | 24.511336 | 2.276571 | 28.286696 | H | 30.613412 | 3.489872 | 24.396038 |
| H | 25.997305 | 3.039206 | 26.506517 | H | 44.770340 | 1.877757 | 23.219412 |
| H | 21.501759 | 5.257050 | 24.071932 | H | 35.615613 | 6.787019 | 30.236143 |
| H | 22.995421 | 5.952262 | 22.306721 | H | 31.481698 | 4.300543 | 29.625489 |
| H | 19.532559 | 2.329838 | 22.589817 | H | 29.698422 | 3.640252 | 31.119699 |
| H | 19.679746 | 1.794368 | 20.190483 | H | 31.288763 | 6.859196 | 17.596527 |
| H | 18.480860 | 3.170986 | 18.536738 | H | 40.771544 | 5.802623 | 21.419791 |
| H | 16.654048 | 6.146427 | 22.827183 | H | 41.252922 | 2.240594 | 22.946556 |

|   |           |          |           |   |           |          |           |
|---|-----------|----------|-----------|---|-----------|----------|-----------|
| H | 53.552137 | 3.699826 | 28.381271 | H | 24.974150 | 6.601872 | 41.769211 |
| H | 55.987719 | 3.325987 | 28.455683 | H | 13.611835 | 3.633431 | 39.869060 |
| H | 57.384051 | 3.866381 | 26.497950 | H | 27.933565 | 2.192343 | 38.997161 |
| H | 52.703583 | 5.454744 | 24.016451 | H | 18.639902 | 6.810532 | 45.764363 |
| H | 54.081457 | 5.977278 | 22.117122 | H | 19.561290 | 7.473970 | 32.719694 |
| H | 50.776969 | 2.334564 | 22.589419 | H | 17.636502 | 6.707689 | 34.008293 |
| H | 50.920580 | 1.795012 | 20.189812 | H | 14.441642 | 4.554044 | 44.825343 |
| H | 49.720365 | 3.170798 | 18.535983 | H | 12.520643 | 3.969539 | 46.170736 |
| H | 47.864296 | 6.135485 | 22.823720 | H | 12.737305 | 3.641950 | 32.608478 |
| H | 46.741603 | 7.497600 | 21.163657 | H | 14.005623 | 7.215987 | 33.307100 |
| H | 45.521588 | 7.316931 | 27.168792 | H | 24.232682 | 6.615986 | 37.495298 |
| H | 46.245677 | 3.331566 | 24.485050 | H | 24.541992 | 2.683432 | 38.633009 |
| H | 50.966621 | 7.203770 | 30.277570 | H | 36.440756 | 2.369466 | 43.891563 |
| H | 47.060949 | 4.477604 | 29.325650 | H | 38.902814 | 1.873138 | 43.890264 |
| H | 45.212211 | 3.680417 | 30.660286 | H | 40.360647 | 2.810569 | 42.161101 |
| H | 46.907584 | 6.858320 | 17.596187 | H | 35.733557 | 5.104882 | 39.990605 |
| H | 56.056786 | 5.973719 | 21.101979 | H | 37.153317 | 5.933011 | 38.175872 |
| H | 10.790872 | 8.127964 | 42.498587 | H | 33.528748 | 2.140162 | 38.548743 |
| H | 9.244520  | 6.787292 | 41.129779 | H | 33.675110 | 1.559615 | 36.109289 |
| H | 12.054201 | 2.324433 | 38.544124 | H | 32.840577 | 3.107504 | 34.414617 |
| H | 8.520615  | 3.174370 | 38.234517 | H | 31.482781 | 6.496222 | 38.660033 |
| H | 20.711600 | 2.655818 | 43.600768 | H | 30.566666 | 8.032017 | 36.946182 |
| H | 23.093970 | 2.080240 | 43.764537 | H | 28.966143 | 7.485383 | 43.112059 |
| H | 24.712550 | 3.040931 | 42.213516 | H | 41.802706 | 7.894121 | 42.648455 |
| H | 20.415598 | 5.529239 | 39.680143 | H | 40.326829 | 6.368135 | 41.451046 |
| H | 22.047449 | 6.414371 | 38.139924 | H | 29.462994 | 3.546485 | 40.387672 |
| H | 18.103795 | 2.315452 | 37.895613 | H | 43.390145 | 2.090840 | 38.730947 |
| H | 18.090324 | 1.838195 | 35.483774 | H | 34.155785 | 6.669156 | 46.343742 |
| H | 16.894264 | 3.295223 | 33.940654 | H | 35.654617 | 7.353430 | 32.625742 |
| H | 15.252879 | 6.212546 | 38.396326 | H | 33.858844 | 6.616802 | 34.105582 |
| H | 14.038501 | 7.612551 | 36.829912 | H | 30.106123 | 4.503003 | 44.848970 |
| H | 13.169387 | 7.510054 | 42.646516 | H | 27.918753 | 4.059677 | 45.888675 |
| H | 26.508912 | 8.007469 | 43.047607 | H | 28.826345 | 3.587918 | 33.233781 |

|   |           |          |           |   |           |          |           |
|---|-----------|----------|-----------|---|-----------|----------|-----------|
| H | 30.568520 | 7.510153 | 33.538904 | H | 16.908746 | 2.001315 | 51.072283 |
| H | 39.214353 | 6.119570 | 37.367691 | H | 15.764705 | 3.470281 | 49.505382 |
| H | 39.852438 | 2.393594 | 38.629246 | H | 14.069773 | 6.423320 | 53.919566 |
| H | 52.223426 | 3.706219 | 43.946354 | H | 12.929184 | 7.848140 | 52.322156 |
| H | 54.659178 | 3.327005 | 44.019474 | H | 11.840433 | 7.509792 | 58.211907 |
| H | 56.055346 | 3.866418 | 42.061264 | H | 24.867557 | 7.898884 | 58.235744 |
| H | 51.374881 | 5.455348 | 39.580372 | H | 23.403793 | 6.553155 | 56.828145 |
| H | 52.752615 | 5.976726 | 37.680284 | H | 12.284781 | 3.635338 | 55.429434 |
| H | 49.550566 | 2.603565 | 38.014027 | H | 26.473935 | 2.476881 | 53.809136 |
| H | 49.626859 | 2.109648 | 35.608166 | H | 17.168793 | 6.738849 | 61.411006 |
| H | 48.380498 | 3.476527 | 34.023659 | H | 18.516507 | 7.391607 | 48.150578 |
| H | 46.470483 | 6.339740 | 38.407780 | H | 16.573585 | 6.753477 | 49.481691 |
| H | 45.222359 | 7.656382 | 36.797539 | H | 13.133819 | 4.372040 | 60.400841 |
| H | 44.227248 | 7.507693 | 42.696574 | H | 11.278470 | 3.573158 | 61.719532 |
| H | 44.900646 | 3.565478 | 39.933278 | H | 11.506545 | 3.910918 | 48.219180 |
| H | 49.679858 | 7.157309 | 45.872301 | H | 12.966689 | 7.443227 | 48.799699 |
| H | 50.753283 | 7.788455 | 32.657653 | H | 22.376068 | 6.491997 | 52.509615 |
| H | 48.898486 | 6.920196 | 33.985587 | H | 22.954257 | 2.866122 | 53.612798 |
| H | 45.689853 | 4.579817 | 44.853417 | H | 35.069047 | 2.979880 | 59.286297 |
| H | 43.797166 | 3.841150 | 46.162444 | H | 37.454041 | 2.382757 | 59.330065 |
| H | 44.197855 | 3.512012 | 32.702166 | H | 38.936229 | 3.072324 | 57.517788 |
| H | 45.288422 | 7.217039 | 33.279836 | H | 34.462774 | 5.348166 | 55.093549 |
| H | 54.726535 | 5.966285 | 36.662888 | H | 35.956899 | 5.984050 | 53.301798 |
| H | 9.463421  | 8.127169 | 58.062817 | H | 32.683660 | 2.688540 | 53.485921 |
| H | 7.917006  | 6.786887 | 56.693606 | H | 32.662046 | 2.174335 | 51.052267 |
| H | 10.726903 | 2.324683 | 54.106960 | H | 31.160858 | 3.389488 | 49.529351 |
| H | 7.192569  | 3.172857 | 53.799874 | H | 29.217086 | 6.141537 | 54.003980 |
| H | 19.568459 | 2.888113 | 59.177902 | H | 27.559603 | 7.082464 | 52.456878 |
| H | 21.966101 | 2.340270 | 59.131316 | H | 27.273574 | 7.413309 | 58.357666 |
| H | 23.394623 | 3.177946 | 57.340960 | H | 40.485949 | 7.801069 | 58.142059 |
| H | 18.828349 | 5.491088 | 55.139980 | H | 39.022819 | 6.376960 | 56.820647 |
| H | 20.268608 | 6.275605 | 53.369621 | H | 27.960635 | 3.766172 | 55.234408 |
| H | 16.857803 | 2.465300 | 53.483712 | H | 42.065723 | 2.080312 | 54.098699 |



|   |           |          |           |   |           |          |           |
|---|-----------|----------|-----------|---|-----------|----------|-----------|
| H | 32.787148 | 6.739803 | 61.408511 | H | 30.768397 | 6.356730 | 65.154696 |
| H | 33.740033 | 7.197294 | 48.766209 | H | 25.880609 | 3.425393 | 63.796175 |
| H | 31.641311 | 6.493214 | 49.844630 | H | 48.307667 | 7.158864 | 63.833786 |
| H | 28.746629 | 4.376792 | 60.399763 | H | 46.387448 | 6.358028 | 65.153328 |
| H | 26.897814 | 3.574114 | 61.718588 | H | 41.497052 | 3.431033 | 63.794363 |
| H | 26.622549 | 4.212713 | 47.771687 | H | 54.922459 | 4.682604 | 55.325501 |
| H | 27.168040 | 6.049606 | 49.238248 | H | 56.250018 | 4.683007 | 39.763369 |
| H | 38.076766 | 6.058672 | 52.449771 | H | 57.578857 | 4.683485 | 24.200316 |
| H | 38.555645 | 2.506613 | 53.839447 | H | 32.654154 | 5.043609 | 18.026506 |
| H | 50.894658 | 3.699348 | 59.505914 | H | 17.034688 | 5.043879 | 18.026654 |
| H | 53.331500 | 3.325387 | 59.581284 | H | 10.176533 | 4.915018 | 24.089462 |
| H | 54.727811 | 3.865796 | 57.623315 | H | 8.847927  | 4.915211 | 39.653227 |
| H | 50.047827 | 5.461177 | 55.145837 | H | 7.520504  | 4.915235 | 55.216509 |
| H | 51.425187 | 5.978068 | 53.243281 | H | 12.998810 | 5.198730 | 65.269021 |
| H | 48.330827 | 2.713020 | 53.462707 | H | 28.618806 | 5.198511 | 65.268116 |
| H | 48.386015 | 2.256006 | 51.049442 | H | 44.238275 | 5.198802 | 65.266960 |
| H | 47.057698 | 3.589928 | 49.507460 | H | 48.273871 | 5.043411 | 18.026041 |
| H | 45.145558 | 6.347463 | 53.959057 | C | 22.884648 | 5.079798 | 47.466822 |
| H | 43.831227 | 7.646214 | 52.387594 | C | 24.373992 | 5.336293 | 47.525238 |
| H | 42.893978 | 7.346915 | 58.262893 | C | 25.124393 | 5.723395 | 46.314404 |
| H | 43.565845 | 3.472738 | 55.402002 | C | 24.442461 | 5.869382 | 44.966094 |
| H | 48.405407 | 6.744820 | 61.407784 | C | 22.906188 | 5.829465 | 45.052413 |
| H | 49.455169 | 7.740622 | 48.250464 | C | 22.405208 | 4.767559 | 46.040384 |
| H | 47.547810 | 6.944242 | 49.545495 | O | 25.198720 | 4.373272 | 46.834728 |
| H | 44.382398 | 4.361986 | 60.399736 | C | 35.147709 | 8.215033 | 41.949204 |
| H | 42.519236 | 3.571622 | 61.717720 | C | 36.145752 | 8.093221 | 40.976403 |
| H | 42.760706 | 3.684768 | 48.196242 | C | 37.490714 | 8.047994 | 41.353270 |
| H | 43.832969 | 7.240881 | 48.866334 | C | 37.850464 | 8.132277 | 42.701222 |
| H | 53.398489 | 5.963910 | 52.224563 | C | 36.848635 | 8.255131 | 43.672139 |
| H | 17.068384 | 7.157736 | 63.836136 | C | 35.502874 | 8.290157 | 43.303883 |
| H | 15.148310 | 6.357045 | 65.155581 | N | 33.768351 | 8.143981 | 41.583496 |
| H | 10.262139 | 3.421942 | 63.798186 | H | 24.775937 | 6.810597 | 44.498335 |
| H | 32.688191 | 7.158119 | 63.835003 | H | 24.775928 | 5.632773 | 48.506458 |

|                                        |           |          |           |   |           |          |           |
|----------------------------------------|-----------|----------|-----------|---|-----------|----------|-----------|
| H                                      | 26.065951 | 6.276436 | 46.447166 | C | 22.529919 | 4.998496 | 24.166664 |
| H                                      | 22.488496 | 5.655886 | 44.045469 | C | 23.370560 | 5.386960 | 23.128625 |
| H                                      | 22.532286 | 6.818716 | 45.382481 | C | 24.737093 | 5.126566 | 23.184225 |
| H                                      | 21.301858 | 4.713849 | 46.024293 | C | 25.280643 | 4.434689 | 24.275390 |
| H                                      | 22.782958 | 3.773479 | 45.742822 | O | 25.565526 | 5.524592 | 22.140774 |
| H                                      | 22.632265 | 4.256102 | 48.159851 | O | 20.437332 | 5.506397 | 26.195132 |
| H                                      | 22.376088 | 5.985955 | 47.850195 | O | 19.909990 | 3.361518 | 26.655617 |
| H                                      | 24.815807 | 5.060699 | 44.312664 | C | 20.768289 | 4.287470 | 26.421987 |
| H                                      | 35.866713 | 7.997401 | 39.921989 | C | 18.226927 | 4.022014 | 22.293999 |
| H                                      | 38.258906 | 7.928946 | 40.583192 | C | 18.992915 | 2.941012 | 21.873981 |
| H                                      | 38.903450 | 8.090973 | 42.995692 | C | 19.081890 | 2.638017 | 20.519979 |
| H                                      | 37.115941 | 8.309639 | 44.732474 | C | 18.404876 | 3.417024 | 19.587993 |
| H                                      | 34.716072 | 8.332143 | 44.062994 | C | 17.639888 | 4.497025 | 20.008011 |
| H                                      | 33.601167 | 8.357939 | 40.598905 | C | 17.550913 | 4.800019 | 21.362013 |
| H                                      | 33.168358 | 8.730687 | 42.166662 | C | 16.783924 | 5.881020 | 21.784030 |
|                                        |           |          |           | C | 16.107910 | 6.659026 | 20.850045 |
|                                        |           |          |           | C | 16.197885 | 6.355032 | 19.497042 |
|                                        |           |          |           | C | 16.963876 | 5.274031 | 19.076025 |
|                                        |           |          |           | O | 15.523872 | 7.185038 | 18.539057 |
|                                        |           |          |           | O | 18.566061 | 5.526425 | 24.115771 |
|                                        |           |          |           | O | 18.021125 | 3.385519 | 24.574827 |
|                                        |           |          |           | C | 18.264463 | 4.334421 | 23.747076 |
|                                        |           |          |           | C | 14.301000 | 5.801000 | 25.782000 |
|                                        |           |          |           | C | 13.829000 | 6.909000 | 26.476000 |
|                                        |           |          |           | C | 27.923368 | 7.014460 | 26.470942 |
|                                        |           |          |           | C | 27.093476 | 6.164458 | 25.748631 |
|                                        |           |          |           | C | 27.610959 | 5.048070 | 25.060126 |
|                                        |           |          |           | C | 29.007172 | 4.790068 | 25.119921 |
|                                        |           |          |           | C | 13.900000 | 3.935000 | 24.313000 |
|                                        |           |          |           | C | 28.692192 | 2.897509 | 23.630416 |
|                                        |           |          |           | C | 27.324767 | 3.112799 | 23.597630 |
|                                        |           |          |           | C | 26.758794 | 4.191593 | 24.313604 |
|                                        |           |          |           | O | 26.563739 | 2.211177 | 22.856690 |
| <br>( <i>R,R</i> )-1-RC (QM(B3LYP)/MM) |           |          |           |   |           |          |           |
| C                                      | 12.487000 | 7.261000 | 26.395000 |   |           |          |           |
| C                                      | 11.616000 | 6.503000 | 25.622000 |   |           |          |           |
| C                                      | 12.086000 | 5.395000 | 24.927000 |   |           |          |           |
| C                                      | 13.428000 | 5.043000 | 25.007000 |   |           |          |           |
| C                                      | 13.027000 | 3.179000 | 23.539000 |   |           |          |           |
| C                                      | 11.685000 | 3.529000 | 23.460000 |   |           |          |           |
| C                                      | 11.215000 | 4.638000 | 24.154000 |   |           |          |           |
| O                                      | 10.782000 | 2.793000 | 22.654000 |   |           |          |           |
| Cu                                     | 18.546773 | 6.079553 | 26.021782 |   |           |          |           |
| Cu                                     | 17.948161 | 3.692683 | 26.531675 |   |           |          |           |
| C                                      | 22.213300 | 3.930369 | 26.377596 |   |           |          |           |
| C                                      | 22.759923 | 3.170687 | 27.427977 |   |           |          |           |
| C                                      | 24.113016 | 2.854892 | 27.450187 |   |           |          |           |
| C                                      | 24.943615 | 3.284687 | 26.420565 |   |           |          |           |
| C                                      | 24.434040 | 4.019629 | 25.333239 |   |           |          |           |
| C                                      | 23.048577 | 4.329986 | 25.296337 |   |           |          |           |

|    |           |          |           |    |           |          |           |
|----|-----------|----------|-----------|----|-----------|----------|-----------|
| O  | 16.598558 | 6.401421 | 25.856933 | C  | 32.403849 | 5.880988 | 21.783783 |
| O  | 16.054015 | 4.262157 | 26.321133 | C  | 31.727822 | 6.658998 | 20.849812 |
| C  | 15.736235 | 5.460870 | 25.987605 | C  | 31.817772 | 6.355006 | 19.496807 |
| C  | 17.909987 | 5.813879 | 30.236582 | C  | 32.583750 | 5.274004 | 19.075773 |
| C  | 18.901844 | 6.572025 | 30.885679 | O  | 31.143744 | 7.185017 | 18.538837 |
| C  | 16.752885 | 5.410865 | 30.960821 | O  | 34.113758 | 5.509316 | 24.154401 |
| C  | 15.679239 | 4.743737 | 30.333255 | O  | 33.625040 | 3.349455 | 24.577023 |
| C  | 14.565951 | 4.350157 | 31.069395 | C  | 33.852825 | 4.315111 | 23.761099 |
| O  | 18.436767 | 6.395910 | 27.983731 | C  | 29.843336 | 5.634920 | 25.902837 |
| O  | 17.896428 | 4.252443 | 28.435387 | C  | 29.285306 | 6.754701 | 26.546093 |
| C  | 18.098874 | 5.466034 | 28.801386 | C  | 43.542082 | 6.891091 | 26.568458 |
| Cu | 34.102915 | 6.022291 | 26.077308 | C  | 42.717685 | 6.028764 | 25.857041 |
| Cu | 33.551549 | 3.618548 | 26.550916 | C  | 43.241285 | 4.909125 | 25.178389 |
| C  | 37.810057 | 3.911674 | 26.435705 | C  | 44.640190 | 4.658656 | 25.238942 |
| C  | 38.332190 | 3.172666 | 27.513700 | C  | 29.533639 | 3.718024 | 24.371325 |
| C  | 39.679522 | 2.838281 | 27.565043 | C  | 44.327750 | 2.732791 | 23.794035 |
| C  | 40.529700 | 3.223963 | 26.535008 | C  | 42.960634 | 2.953113 | 23.744737 |
| C  | 40.047191 | 3.939142 | 25.422832 | C  | 42.391983 | 4.046656 | 24.435756 |
| C  | 38.668065 | 4.277660 | 25.361072 | O  | 42.202246 | 2.041306 | 23.013889 |
| C  | 38.178750 | 4.938357 | 24.215064 | O  | 32.133577 | 6.317997 | 25.961401 |
| C  | 39.040805 | 5.282746 | 23.178246 | O  | 31.649349 | 4.155282 | 26.377524 |
| C  | 40.400307 | 4.987959 | 23.253772 | C  | 31.294421 | 5.354355 | 26.090073 |
| C  | 40.916081 | 4.308497 | 24.366280 | C  | 33.559518 | 5.674999 | 30.301712 |
| O  | 41.249930 | 5.345580 | 22.212667 | C  | 34.597535 | 6.370941 | 30.948156 |
| O  | 36.011822 | 5.470538 | 26.212932 | C  | 32.386040 | 5.336150 | 31.032573 |
| O  | 35.514224 | 3.316519 | 26.662721 | C  | 31.280714 | 4.717437 | 30.412230 |
| C  | 36.360273 | 4.255529 | 26.442388 | C  | 30.139188 | 4.413834 | 31.148949 |
| C  | 33.846855 | 4.021974 | 22.293721 | O  | 34.023399 | 6.296881 | 28.047806 |
| C  | 34.612832 | 2.940971 | 21.873686 | O  | 33.502329 | 4.142729 | 28.470580 |
| C  | 34.701783 | 2.637980 | 20.519681 | C  | 33.710248 | 5.350058 | 28.855584 |
| C  | 34.024755 | 3.416991 | 19.587710 | Cu | 49.694877 | 6.206760 | 25.985362 |
| C  | 33.259777 | 4.496993 | 20.007743 | Cu | 49.345408 | 3.788930 | 26.565607 |
| C  | 33.170827 | 4.799985 | 21.361749 | C  | 53.571004 | 4.464799 | 26.367945 |

|   |           |          |           |    |           |          |           |
|---|-----------|----------|-----------|----|-----------|----------|-----------|
| C | 54.157059 | 3.947781 | 27.515908 | C  | 49.206046 | 5.990064 | 30.220104 |
| C | 55.530060 | 3.732767 | 27.559832 | C  | 50.151318 | 6.829250 | 30.837732 |
| C | 56.316003 | 4.036770 | 26.454793 | C  | 48.092759 | 5.519089 | 30.970604 |
| C | 55.729947 | 4.554788 | 25.305829 | C  | 47.064367 | 4.758642 | 30.373854 |
| C | 54.356948 | 4.768802 | 25.262905 | C  | 45.990950 | 4.304455 | 31.133638 |
| C | 53.770890 | 5.287820 | 24.113942 | O  | 49.610589 | 6.566950 | 27.940995 |
| C | 54.557834 | 5.591822 | 23.007903 | O  | 49.302679 | 4.391963 | 28.456855 |
| C | 55.929834 | 5.377808 | 23.052827 | C  | 49.392841 | 5.628529 | 28.788961 |
| C | 56.515890 | 4.858790 | 24.200790 | C  | 11.158284 | 7.260965 | 41.959133 |
| O | 56.643771 | 5.617813 | 21.841791 | C  | 10.287267 | 6.502972 | 41.186144 |
| O | 51.637482 | 5.837795 | 26.122160 | C  | 10.757252 | 5.394972 | 40.491132 |
| O | 51.335480 | 3.660886 | 26.634835 | C  | 12.099252 | 5.042967 | 40.571107 |
| C | 52.093272 | 4.666993 | 26.380510 | C  | 11.698220 | 3.178974 | 39.103108 |
| C | 49.466780 | 4.021882 | 22.293161 | C  | 10.356220 | 3.528979 | 39.024133 |
| C | 50.232747 | 2.940878 | 21.873109 | C  | 9.886236  | 4.637978 | 39.718145 |
| C | 50.321671 | 2.637891 | 20.519101 | O  | 9.453203  | 2.792985 | 38.218146 |
| C | 49.644629 | 3.416907 | 19.587145 | Cu | 17.240749 | 6.122556 | 41.483736 |
| C | 48.879663 | 4.496911 | 20.007197 | Cu | 16.677841 | 3.727727 | 41.986564 |
| C | 48.790739 | 4.799899 | 21.361205 | C  | 20.946118 | 4.019015 | 41.878686 |
| C | 48.023773 | 5.880903 | 21.783256 | C  | 21.455610 | 3.274302 | 42.958596 |
| C | 47.347732 | 6.658919 | 20.849300 | C  | 22.806867 | 2.960943 | 43.037246 |
| C | 47.437657 | 6.354932 | 19.496292 | C  | 23.675137 | 3.375824 | 42.033962 |
| C | 48.203622 | 5.273928 | 19.075240 | C  | 23.207562 | 4.096469 | 40.919643 |
| O | 46.763615 | 7.184949 | 18.538336 | C  | 21.824139 | 4.411835 | 40.828632 |
| O | 49.728122 | 5.591957 | 24.090965 | C  | 21.351305 | 5.073096 | 39.675938 |
| O | 49.383984 | 3.426249 | 24.609313 | C  | 22.232846 | 5.436798 | 38.661558 |
| C | 49.523885 | 4.369008 | 23.750430 | C  | 23.593351 | 5.160148 | 38.765849 |
| C | 45.475703 | 5.534457 | 25.986745 | C  | 24.090107 | 4.488069 | 39.887279 |
| C | 44.907286 | 6.651290 | 26.627454 | O  | 24.457488 | 5.517886 | 37.738951 |
| C | 45.168336 | 3.568605 | 24.519841 | O  | 19.146825 | 5.569485 | 41.624243 |
| O | 47.713651 | 6.339614 | 25.892213 | O  | 18.644543 | 3.421256 | 42.094405 |
| O | 47.394306 | 4.171724 | 26.425086 | C  | 19.493495 | 4.357470 | 41.867882 |
| C | 46.947340 | 5.332598 | 26.103879 | C  | 16.880354 | 4.110050 | 37.735709 |

|   |           |          |           |    |           |          |           |
|---|-----------|----------|-----------|----|-----------|----------|-----------|
| C | 17.580761 | 3.005032 | 37.219334 | C  | 14.485180 | 4.741533 | 45.884233 |
| C | 17.587339 | 2.740383 | 35.856347 | C  | 13.393039 | 4.353722 | 46.654479 |
| C | 16.891312 | 3.570759 | 34.985041 | C  | 14.491435 | 4.602204 | 32.436846 |
| C | 16.149915 | 4.672638 | 35.459740 | C  | 15.524625 | 5.292550 | 33.085130 |
| C | 16.125726 | 4.934282 | 36.855673 | O  | 13.375259 | 4.197851 | 33.160663 |
| C | 15.325501 | 5.989808 | 37.337355 | O  | 17.163727 | 6.425079 | 43.449336 |
| C | 14.608187 | 6.787350 | 36.454426 | O  | 16.642866 | 4.276728 | 43.897874 |
| C | 14.657315 | 6.570087 | 35.087547 | C  | 16.849150 | 5.488698 | 44.268791 |
| C | 15.435616 | 5.512593 | 34.564717 | Cu | 32.921107 | 6.348855 | 41.577806 |
| O | 13.939426 | 7.453468 | 34.284417 | Cu | 32.432137 | 3.861543 | 42.072419 |
| O | 17.239702 | 5.583410 | 39.572739 | C  | 36.637348 | 4.133332 | 41.757057 |
| O | 16.741512 | 3.429013 | 40.018444 | C  | 37.159611 | 3.465031 | 42.850620 |
| C | 16.961057 | 4.388747 | 39.194982 | C  | 38.532031 | 3.135090 | 42.889121 |
| C | 12.972269 | 5.800962 | 41.346096 | C  | 39.364021 | 3.463756 | 41.840401 |
| C | 12.500284 | 6.908961 | 42.040108 | C  | 38.873241 | 4.132365 | 40.672157 |
| C | 26.763498 | 7.109895 | 42.084413 | C  | 37.466652 | 4.447451 | 40.629974 |
| C | 25.918459 | 6.264018 | 41.397284 | C  | 36.943361 | 5.032041 | 39.443323 |
| C | 26.399705 | 5.091585 | 40.728479 | C  | 37.756767 | 5.340274 | 38.381095 |
| C | 27.809292 | 4.801685 | 40.828598 | C  | 39.156845 | 5.114888 | 38.448101 |
| C | 12.571236 | 3.934968 | 39.877095 | C  | 39.718613 | 4.500057 | 39.567320 |
| C | 27.481765 | 2.844179 | 39.417766 | O  | 39.945763 | 5.496597 | 37.406800 |
| C | 26.091608 | 3.114272 | 39.320348 | O  | 34.852879 | 5.706943 | 41.553747 |
| C | 25.543472 | 4.216751 | 39.968775 | O  | 34.380750 | 3.585073 | 42.129608 |
| O | 25.415589 | 2.197667 | 38.565440 | C  | 35.181788 | 4.505824 | 41.805963 |
| O | 15.276764 | 6.426139 | 41.362847 | C  | 32.490140 | 4.274905 | 37.856621 |
| O | 14.768883 | 4.276761 | 41.813962 | C  | 33.128408 | 3.124011 | 37.423511 |
| C | 14.424786 | 5.476819 | 41.510084 | C  | 33.129398 | 2.790674 | 36.054138 |
| C | 16.702656 | 5.829369 | 45.712460 | C  | 32.474634 | 3.589375 | 35.140566 |
| C | 17.710096 | 6.594356 | 46.329660 | C  | 31.765934 | 4.770742 | 35.536241 |
| C | 18.791816 | 6.885033 | 32.234473 | C  | 31.777713 | 5.113606 | 36.936446 |
| C | 17.686795 | 6.452531 | 32.958906 | C  | 31.033034 | 6.252786 | 37.360725 |
| C | 16.655764 | 5.716145 | 32.344337 | C  | 30.320673 | 7.004319 | 36.462280 |
| C | 15.569353 | 5.425443 | 46.473620 | C  | 30.325922 | 6.694042 | 35.076702 |

|   |           |          |           |    |           |          |           |
|---|-----------|----------|-----------|----|-----------|----------|-----------|
| C | 31.050389 | 5.604414 | 34.602998 | Cu | 48.429298 | 6.365056 | 41.555352 |
| O | 29.593147 | 7.569355 | 34.326022 | Cu | 47.998671 | 3.937920 | 42.037088 |
| O | 32.813349 | 5.783875 | 39.667556 | C  | 52.242277 | 4.464616 | 41.931345 |
| O | 32.437432 | 3.611780 | 40.115233 | C  | 52.828352 | 3.947593 | 43.079296 |
| C | 32.578246 | 4.587970 | 39.318957 | C  | 54.201352 | 3.732573 | 43.123194 |
| C | 28.659847 | 5.696987 | 41.561249 | C  | 54.987277 | 4.036578 | 42.018142 |
| C | 28.145336 | 6.839081 | 42.152576 | C  | 54.401202 | 4.554601 | 40.869191 |
| C | 42.233103 | 7.134146 | 41.830827 | C  | 53.028202 | 4.768621 | 40.826292 |
| C | 41.442834 | 6.281215 | 41.069673 | C  | 52.442128 | 5.287645 | 39.677341 |
| C | 41.999268 | 5.173743 | 40.399672 | C  | 53.229054 | 5.591649 | 38.571289 |
| C | 43.397793 | 4.935611 | 40.506162 | C  | 54.601054 | 5.377629 | 38.616189 |
| C | 28.312063 | 3.653810 | 40.148556 | C  | 55.187129 | 4.858606 | 39.764139 |
| C | 43.157495 | 3.056081 | 38.988419 | O  | 55.314970 | 5.617636 | 37.405141 |
| C | 41.787442 | 3.246849 | 38.917872 | O  | 50.359117 | 5.916996 | 41.721020 |
| C | 41.187378 | 4.310490 | 39.621937 | O  | 49.977383 | 3.740395 | 42.178775 |
| O | 41.061800 | 2.334721 | 38.156417 | C  | 50.772035 | 4.723441 | 41.954873 |
| O | 30.904846 | 6.439577 | 41.593718 | C  | 48.277542 | 4.342268 | 37.795346 |
| O | 30.504971 | 4.263441 | 41.982083 | C  | 49.059605 | 3.282199 | 37.302084 |
| C | 30.130939 | 5.447352 | 41.716414 | C  | 49.110772 | 3.008231 | 35.942081 |
| C | 32.368628 | 5.846499 | 45.794108 | C  | 48.377615 | 3.783107 | 35.050510 |
| C | 33.294818 | 6.666401 | 46.413754 | C  | 47.559095 | 4.839785 | 35.500868 |
| C | 34.509422 | 6.694896 | 32.296193 | C  | 47.494558 | 5.113922 | 36.893208 |
| C | 33.377647 | 6.341726 | 33.021800 | C  | 46.626524 | 6.126500 | 37.349066 |
| C | 32.303660 | 5.665010 | 32.412962 | C  | 45.882668 | 6.874058 | 36.445060 |
| C | 31.241040 | 5.334127 | 46.522206 | C  | 45.963088 | 6.641015 | 35.082473 |
| C | 30.227714 | 4.543480 | 45.907370 | C  | 46.805593 | 5.621052 | 34.585462 |
| C | 29.145170 | 4.092127 | 46.622683 | O  | 45.207546 | 7.470711 | 34.256917 |
| C | 30.069414 | 4.705669 | 32.508486 | O  | 48.488747 | 5.833785 | 39.642025 |
| C | 31.143483 | 5.331858 | 33.149899 | O  | 48.119879 | 3.650513 | 40.071827 |
| O | 28.914663 | 4.415708 | 33.223921 | C  | 48.298688 | 4.624447 | 39.255692 |
| O | 32.930336 | 6.469874 | 43.582021 | C  | 44.195395 | 5.787375 | 41.322481 |
| O | 32.402215 | 4.322520 | 43.983005 | C  | 43.594400 | 6.890731 | 41.956504 |
| C | 32.580535 | 5.522271 | 44.344108 | C  | 43.964527 | 3.880187 | 39.765177 |

|    |           |          |           |   |           |          |           |
|----|-----------|----------|-----------|---|-----------|----------|-----------|
| O  | 46.451860 | 6.560835 | 41.410438 | C | 19.909656 | 5.135651 | 55.250169 |
| O  | 46.064905 | 4.378132 | 41.822689 | C | 20.745720 | 5.528135 | 54.209585 |
| C  | 45.656508 | 5.560277 | 41.528826 | C | 22.109489 | 5.249806 | 54.248685 |
| C  | 47.851956 | 6.023016 | 45.769465 | C | 22.655006 | 4.539064 | 55.326646 |
| C  | 48.815163 | 6.829354 | 46.404377 | O | 22.933248 | 5.650052 | 53.202540 |
| C  | 50.039256 | 7.160496 | 32.182282 | O | 17.799899 | 5.589030 | 57.304306 |
| C  | 48.977045 | 6.667361 | 32.932237 | O | 17.307036 | 3.418255 | 57.673736 |
| C  | 47.991647 | 5.848470 | 32.348089 | C | 18.150156 | 4.367660 | 57.486974 |
| C  | 46.726241 | 5.565912 | 46.510202 | C | 15.678761 | 4.213606 | 53.319345 |
| C  | 45.684655 | 4.834318 | 45.901481 | C | 16.394258 | 3.108806 | 52.822567 |
| C  | 44.599993 | 4.392946 | 46.653182 | C | 16.443663 | 2.845062 | 51.460684 |
| C  | 45.912717 | 4.587091 | 32.494747 | C | 15.771040 | 3.672498 | 50.569213 |
| C  | 46.901215 | 5.365419 | 33.112520 | C | 15.018753 | 4.776361 | 51.020717 |
| O  | 44.836564 | 4.123247 | 33.242934 | C | 14.961858 | 5.046074 | 52.415370 |
| O  | 48.309621 | 6.653705 | 43.518374 | C | 14.162495 | 6.113507 | 52.870619 |
| O  | 47.896850 | 4.477930 | 43.949005 | C | 13.475920 | 6.912962 | 51.965081 |
| C  | 48.034468 | 5.697316 | 44.327945 | C | 13.547216 | 6.679692 | 50.601628 |
| C  | 9.830844  | 7.260885 | 57.522289 | C | 14.320721 | 5.606639 | 50.104015 |
| C  | 8.959813  | 6.502896 | 56.749314 | O | 12.850963 | 7.559840 | 49.776081 |
| C  | 9.429780  | 5.394897 | 56.054290 | O | 15.954196 | 5.650858 | 55.205834 |
| C  | 10.771780 | 5.042887 | 56.134240 | O | 15.443542 | 3.485594 | 55.577370 |
| C  | 10.370715 | 3.178901 | 54.666241 | C | 15.692595 | 4.465495 | 54.786887 |
| C  | 9.028715  | 3.528910 | 54.587291 | C | 11.644813 | 5.800876 | 56.909215 |
| C  | 8.558747  | 4.637908 | 55.281315 | C | 11.172845 | 6.908875 | 57.603239 |
| O  | 8.125681  | 2.792922 | 53.781316 | C | 25.317853 | 7.032674 | 57.590409 |
| Cu | 15.897777 | 6.133874 | 57.134774 | C | 24.482520 | 6.213477 | 56.840382 |
| Cu | 15.343303 | 3.720885 | 57.551211 | C | 24.990666 | 5.110262 | 56.123773 |
| C  | 19.599508 | 4.033023 | 57.444536 | C | 26.383820 | 4.835382 | 56.180407 |
| C  | 20.149947 | 3.265359 | 58.487029 | C | 11.243748 | 3.934890 | 55.440215 |
| C  | 21.501829 | 2.945525 | 58.499586 | C | 26.052826 | 2.984023 | 54.644683 |
| C  | 22.326531 | 3.375898 | 57.465913 | C | 24.688132 | 3.217461 | 54.610541 |
| C  | 21.813590 | 4.122677 | 56.387996 | C | 24.131576 | 4.283500 | 55.352860 |
| C  | 20.430489 | 4.444592 | 56.365024 | O | 23.919605 | 2.343333 | 53.845011 |

|    |           |          |           |   |           |          |           |
|----|-----------|----------|-----------|---|-----------|----------|-----------|
| O  | 13.941736 | 6.429914 | 56.971202 | C | 31.255437 | 4.095314 | 53.338565 |
| O  | 13.436331 | 4.268786 | 57.367077 | C | 32.038201 | 3.032184 | 52.852469 |
| C  | 13.093019 | 5.474151 | 57.083659 | C | 32.107323 | 2.760667 | 51.492434 |
| C  | 15.283042 | 5.695809 | 61.352094 | C | 31.391998 | 3.541419 | 50.592000 |
| C  | 16.314083 | 6.385792 | 61.978046 | C | 30.573361 | 4.600102 | 51.033075 |
| C  | 17.637120 | 6.917442 | 47.678607 | C | 30.489942 | 4.872395 | 52.425582 |
| C  | 16.551564 | 6.492709 | 48.435806 | C | 29.620327 | 5.887852 | 52.869673 |
| C  | 15.505967 | 5.749737 | 47.855953 | C | 28.890696 | 6.636594 | 51.952373 |
| C  | 14.198077 | 5.242813 | 62.095147 | C | 28.993772 | 6.406484 | 50.590418 |
| C  | 13.166036 | 4.552830 | 61.469195 | C | 29.836811 | 5.383794 | 50.111703 |
| C  | 12.083071 | 4.099834 | 62.213248 | O | 28.257320 | 7.237628 | 49.750629 |
| C  | 13.347973 | 4.632559 | 48.018245 | O | 31.491296 | 5.573219 | 55.199074 |
| C  | 14.391711 | 5.340575 | 48.629790 | O | 31.054364 | 3.398889 | 55.610508 |
| O  | 12.250729 | 4.236256 | 48.774934 | C | 31.265465 | 4.372822 | 54.802048 |
| O  | 15.761402 | 6.375983 | 59.108314 | C | 27.226231 | 5.653150 | 56.983207 |
| O  | 15.278479 | 4.204490 | 59.477709 | C | 26.676626 | 6.757911 | 57.659587 |
| C  | 15.447592 | 5.408274 | 59.892375 | C | 40.901177 | 6.943743 | 57.615258 |
| Cu | 31.473740 | 6.080527 | 57.125770 | C | 40.079357 | 6.118624 | 56.858928 |
| Cu | 30.966367 | 3.663736 | 57.582143 | C | 40.603423 | 5.027209 | 56.135814 |
| C  | 35.214477 | 4.026628 | 57.452663 | C | 42.002106 | 4.773679 | 56.187990 |
| C  | 35.763618 | 3.296627 | 58.523091 | C | 26.900925 | 3.775553 | 55.409054 |
| C  | 37.113795 | 2.971051 | 58.547161 | C | 41.693082 | 2.920856 | 54.650249 |
| C  | 37.939264 | 3.357208 | 57.497295 | C | 40.324876 | 3.135891 | 54.617242 |
| C  | 37.429828 | 4.068619 | 56.394296 | C | 39.753945 | 4.194177 | 55.360117 |
| C  | 36.047796 | 4.397990 | 56.360772 | O | 39.567779 | 2.250494 | 53.853292 |
| C  | 35.530509 | 5.054748 | 55.224671 | O | 29.506308 | 6.349391 | 57.012207 |
| C  | 36.368375 | 5.404956 | 54.170428 | O | 29.052508 | 4.176217 | 57.409349 |
| C  | 37.730992 | 5.120005 | 54.218246 | C | 28.680440 | 5.375965 | 57.142666 |
| C  | 38.274537 | 4.444216 | 55.319928 | C | 30.903116 | 5.695628 | 61.351271 |
| O  | 38.555902 | 5.480687 | 53.158846 | C | 31.934171 | 6.385605 | 61.977208 |
| O  | 33.391257 | 5.558835 | 57.261014 | C | 33.166576 | 6.973850 | 47.785386 |
| O  | 32.932167 | 3.392716 | 57.695006 | C | 32.105252 | 6.485842 | 48.516133 |
| C  | 33.760622 | 4.347773 | 57.478512 | C | 31.097629 | 5.658968 | 47.919812 |



|    |           |          |           |   |           |          |           |
|----|-----------|----------|-----------|---|-----------|----------|-----------|
| C  | 29.818163 | 5.242633 | 62.094342 | C | 44.569637 | 6.642553 | 50.642964 |
| C  | 28.786109 | 4.552656 | 61.468406 | C | 45.432800 | 5.649524 | 50.126110 |
| C  | 27.703155 | 4.099663 | 62.212477 | O | 43.788164 | 7.464940 | 49.834349 |
| C  | 29.011321 | 4.380278 | 48.005927 | O | 47.124391 | 5.806332 | 55.212025 |
| C  | 29.970215 | 5.155504 | 48.655883 | O | 46.813366 | 3.598879 | 55.556263 |
| O  | 27.940204 | 3.898325 | 48.695417 | C | 46.967591 | 4.607409 | 54.778777 |
| O  | 31.377132 | 6.347620 | 59.098111 | C | 42.834437 | 5.606116 | 56.987190 |
| O  | 30.910229 | 4.178225 | 59.500364 | C | 42.264036 | 6.693101 | 57.676762 |
| C  | 31.072372 | 5.389283 | 59.896641 | C | 42.532561 | 3.724627 | 55.412140 |
| Cu | 47.051219 | 6.254007 | 57.149528 | O | 45.075724 | 6.405409 | 57.020809 |
| Cu | 46.686308 | 3.797923 | 57.529573 | O | 44.741056 | 4.199429 | 57.346979 |
| C  | 50.914826 | 4.464382 | 57.493755 | C | 44.303100 | 5.386154 | 57.119709 |
| C  | 51.500920 | 3.947352 | 58.641694 | C | 46.523192 | 5.695393 | 61.350166 |
| C  | 52.873920 | 3.732327 | 58.685568 | C | 47.554258 | 6.385364 | 61.976087 |
| C  | 53.659827 | 4.036331 | 57.580503 | C | 48.704708 | 7.147287 | 47.751645 |
| C  | 53.073733 | 4.554362 | 56.431564 | C | 47.626242 | 6.673507 | 48.489228 |
| C  | 51.700733 | 4.768387 | 56.388690 | C | 46.626349 | 5.882306 | 47.891601 |
| C  | 51.114640 | 5.287417 | 55.239751 | C | 45.438249 | 5.242399 | 62.093255 |
| C  | 51.901547 | 5.591423 | 54.133687 | C | 44.406182 | 4.552428 | 61.467335 |
| C  | 53.273547 | 5.377397 | 54.178561 | C | 43.323240 | 4.099435 | 62.211424 |
| C  | 53.859639 | 4.858367 | 55.326499 | C | 44.523083 | 4.660782 | 48.017647 |
| O  | 53.987443 | 5.617405 | 52.967501 | C | 45.523958 | 5.413115 | 48.648022 |
| O  | 48.992167 | 5.860582 | 57.300821 | O | 43.435171 | 4.209768 | 48.756487 |
| O  | 48.671994 | 3.656284 | 57.666437 | O | 46.920152 | 6.445583 | 59.123755 |
| C  | 49.438007 | 4.673275 | 57.497434 | O | 46.572057 | 4.241054 | 59.459292 |
| C  | 46.964360 | 4.371390 | 53.309688 | C | 46.674446 | 5.445197 | 59.890139 |
| C  | 47.775932 | 3.343820 | 52.794890 | C | 16.262158 | 6.620778 | 63.347051 |
| C  | 47.824143 | 3.089000 | 51.431623 | C | 15.179191 | 6.168782 | 64.090104 |
| C  | 47.057947 | 3.850031 | 50.557018 | C | 14.147152 | 5.478800 | 63.465152 |
| C  | 46.215710 | 4.879384 | 51.026858 | C | 12.031146 | 4.336820 | 63.582253 |
| C  | 46.156617 | 5.135866 | 52.423382 | C | 13.063187 | 5.025805 | 64.207205 |
| C  | 45.267710 | 6.120558 | 52.898397 | O | 10.943183 | 3.908824 | 64.361306 |
| C  | 44.497040 | 6.858885 | 52.009033 | C | 31.882271 | 6.620587 | 63.346214 |

|   |           |          |           |   |           |          |           |
|---|-----------|----------|-----------|---|-----------|----------|-----------|
| C | 30.799317 | 6.168593 | 64.089284 | H | 15.672947 | 6.862243 | 17.596210 |
| C | 29.767262 | 5.478616 | 63.464348 | H | 25.068243 | 6.042231 | 21.431423 |
| C | 27.651255 | 4.336645 | 63.581483 | H | 25.580431 | 2.422010 | 22.869129 |
| C | 28.683309 | 5.025622 | 64.206418 | H | 37.682612 | 2.863059 | 28.324931 |
| O | 26.563304 | 3.908650 | 64.360554 | H | 40.068761 | 2.276627 | 28.408310 |
| C | 47.502385 | 6.620342 | 63.345096 | H | 41.572757 | 2.946600 | 26.607285 |
| C | 46.419443 | 6.168348 | 64.088184 | H | 37.129434 | 5.188308 | 24.097372 |
| C | 45.387375 | 5.478376 | 63.463264 | H | 38.642206 | 5.791312 | 22.311008 |
| C | 43.271365 | 4.336411 | 63.580432 | H | 35.147311 | 2.326586 | 22.590500 |
| C | 44.303433 | 5.025383 | 64.205353 | H | 35.298290 | 1.793349 | 20.190389 |
| O | 42.183428 | 3.908416 | 64.359522 | H | 34.100116 | 3.170555 | 18.536552 |
| H | 12.119120 | 8.126706 | 26.936267 | H | 32.267693 | 6.144918 | 22.826020 |
| H | 10.572991 | 6.786676 | 25.566765 | H | 31.126229 | 7.501053 | 21.163829 |
| H | 13.382274 | 2.321977 | 22.983502 | H | 29.916254 | 7.419609 | 27.125325 |
| H | 9.847369  | 3.169383 | 22.676819 | H | 43.119001 | 7.753339 | 27.073812 |
| H | 22.126909 | 2.835535 | 28.242093 | H | 41.661351 | 6.254868 | 25.829339 |
| H | 24.522952 | 2.277277 | 28.272509 | H | 30.595605 | 3.504317 | 24.332093 |
| H | 25.992382 | 3.024641 | 26.471936 | H | 44.739936 | 1.893144 | 23.250468 |
| H | 21.473139 | 5.218434 | 24.059527 | H | 35.485909 | 6.656280 | 30.395705 |
| H | 22.949062 | 5.900851 | 22.275450 | H | 31.274819 | 4.475071 | 29.354105 |
| H | 19.532426 | 2.329731 | 22.589838 | H | 29.300870 | 3.946719 | 30.649389 |
| H | 19.679872 | 1.794466 | 20.190467 | H | 31.287715 | 6.858288 | 17.596681 |
| H | 18.480924 | 3.171002 | 18.536740 | H | 40.773586 | 5.862970 | 21.488974 |
| H | 16.654530 | 6.146244 | 22.827305 | H | 41.218919 | 2.252830 | 23.021272 |
| H | 15.508366 | 7.502562 | 21.163861 | H | 53.552053 | 3.700251 | 28.381333 |
| H | 14.495393 | 7.507686 | 27.088242 | H | 55.987753 | 3.326311 | 28.455815 |
| H | 27.505331 | 7.876132 | 26.981392 | H | 57.384054 | 3.866433 | 26.498003 |
| H | 26.038700 | 6.398175 | 25.717356 | H | 52.703548 | 5.453423 | 24.015311 |
| H | 14.941350 | 3.633524 | 24.313418 | H | 54.081257 | 5.977706 | 22.117412 |
| H | 29.103619 | 2.072173 | 23.064740 | H | 50.777079 | 2.334871 | 22.589591 |
| H | 19.773800 | 6.909470 | 30.336407 | H | 50.920638 | 1.795061 | 20.189822 |
| H | 15.674510 | 4.529295 | 29.269867 | H | 49.720324 | 3.170750 | 18.536003 |
| H | 13.757514 | 3.837649 | 30.566037 | H | 47.863488 | 6.134936 | 22.823748 |

|                                |                                |
|--------------------------------|--------------------------------|
| H 46.741948 7.497853 21.163692 | H 13.998976 7.232010 33.305283 |
| H 45.536264 7.338488 27.182524 | H 23.994510 6.032055 37.003645 |
| H 46.229838 3.349997 24.496268 | H 24.478821 2.422172 38.453222 |
| H 50.988490 7.216033 30.267398 | H 36.505087 3.205729 43.686700 |
| H 47.065023 4.514915 29.316801 | H 38.937771 2.614819 43.762082 |
| H 45.216442 3.721408 30.654145 | H 40.422354 3.193584 41.907983 |
| H 46.905310 6.856607 17.596437 | H 35.877828 5.251861 39.369371 |
| H 56.056534 5.972755 21.101719 | H 37.326971 5.799705 37.484078 |
| H 10.790905 8.127918 42.498655 | H 33.637899 2.487551 38.151001 |
| H 9.244469 6.787102 41.130146  | H 33.649912 1.889639 35.715107 |
| H 12.054081 2.323837 38.544975 | H 32.493692 3.287655 34.087952 |
| H 8.521129 3.175680 38.233122  | H 31.019675 6.526504 38.415817 |
| H 20.793418 2.947804 43.752892 | H 29.731015 7.864926 36.788440 |
| H 23.185668 2.394528 43.882291 | H 28.818755 7.517233 42.682355 |
| H 24.721587 3.113433 42.127745 | H 41.785626 7.988472 42.328639 |
| H 20.300059 5.302344 39.532993 | H 40.388034 6.507507 40.991703 |
| H 21.846358 5.939449 37.784994 | H 29.373589 3.415731 40.206480 |
| H 18.136414 2.353927 37.884802 | H 43.599603 2.243766 38.426087 |
| H 18.139227 1.889393 35.470299 | H 34.134401 7.059914 45.834998 |
| H 16.921737 3.332209 33.931353 | H 35.321856 7.225508 32.783134 |
| H 15.229715 6.208320 38.394840 | H 33.341389 6.618404 34.067891 |
| H 14.000308 7.598842 36.831829 | H 30.307327 4.286809 44.851772 |
| H 13.169415 7.510814 42.645861 | H 28.376649 3.490821 46.121585 |
| H 26.360022 8.000573 42.576154 | H 28.232307 3.916519 32.671526 |
| H 24.853324 6.516885 41.363135 | H 29.509525 7.288755 33.401705 |
| H 13.611882 3.633719 39.869022 | H 39.421866 6.019330 36.776628 |
| H 27.870001 1.971477 38.886404 | H 40.070239 2.517635 38.151345 |
| H 18.565248 6.931474 45.754312 | H 52.223689 3.708193 43.947076 |
| H 19.569530 7.462393 32.724063 | H 54.659308 3.327777 44.019758 |
| H 17.635545 6.711884 34.007754 | H 56.055358 3.866492 42.061303 |
| H 14.456273 4.507770 44.825369 | H 51.374847 5.454265 39.580034 |
| H 12.576461 3.826611 46.180183 | H 52.752455 5.977694 37.680766 |
| H 12.719483 3.677718 32.596812 | H 49.643065 2.673348 37.983791 |

|                                |                                |
|--------------------------------|--------------------------------|
| H 49.724533 2.192087 35.574643 | H 17.168559 6.738943 61.410781 |
| H 48.442742 3.537461 34.000115 | H 18.427577 7.499166 48.142088 |
| H 46.498298 6.350287 38.401782 | H 16.528057 6.761248 49.483367 |
| H 45.223936 7.654237 36.802627 | H 13.129813 4.375030 60.400673 |
| H 44.193884 7.562774 42.560482 | H 11.278537 3.573053 61.719504 |
| H 45.031036 3.682666 39.761518 | H 11.584015 3.704416 48.235533 |
| H 49.663631 7.205132 45.843357 | H 12.944240 7.340240 48.799048 |
| H 50.781548 7.800412 32.648369 | H 22.436162 6.179586 52.501854 |
| H 48.921968 6.943335 33.976688 | H 22.941645 2.577594 53.843338 |
| H 45.683895 4.603234 44.841651 | H 35.132103 2.984225 59.347317 |
| H 43.815665 3.830894 46.164742 | H 37.524089 2.413808 59.383145 |
| H 44.208152 3.549928 32.699908 | H 38.984491 3.083308 57.546703 |
| H 45.290341 7.236983 33.282316 | H 34.477597 5.297690 55.128101 |
| H 54.726166 5.964390 36.662271 | H 35.948624 5.909657 53.310924 |
| H 9.463491 8.127327 58.062561  | H 32.608670 2.418175 53.540433 |
| H 7.917045 6.786971 56.693424  | H 32.721504 1.941630 51.131480 |
| H 10.726834 2.324333 54.107405 | H 31.470269 3.296292 49.540948 |
| H 7.194193 3.177053 53.794367  | H 29.482375 6.110781 53.922548 |
| H 19.519616 2.923177 59.300232 | H 28.226841 7.417600 52.300020 |
| H 21.914682 2.360825 59.315282 | H 27.312732 7.401467 58.257098 |
| H 23.373702 3.108120 57.507485 | H 40.477528 7.783557 58.156516 |
| H 18.855113 5.372600 55.158232 | H 39.024760 6.352069 56.831798 |
| H 20.323193 6.059024 53.367351 | H 27.960205 3.548696 55.371427 |
| H 16.925390 2.453772 53.504193 | H 42.107452 2.111883 54.063514 |
| H 17.006722 1.993726 51.091900 | H 32.789462 6.736463 61.409876 |
| H 15.831143 3.431564 49.517426 | H 33.915836 7.606989 48.270585 |
| H 14.044740 6.341412 53.923868 | H 32.036386 6.750010 49.576007 |
| H 12.870334 7.735235 52.322211 | H 28.749379 4.375496 60.399737 |
| H 11.840824 7.509348 58.211819 | H 26.898317 3.573349 61.718611 |
| H 24.907173 7.883346 58.124734 | H 27.382657 3.366442 48.104116 |
| H 23.430875 6.460673 56.811326 | H 28.372347 7.019269 48.772800 |
| H 12.284899 3.635864 55.427859 | H 38.061342 5.988869 52.440775 |
| H 26.456885 2.168112 54.060324 | H 38.586299 2.469192 53.855395 |

|   |           |          |           |   |           |           |           |
|---|-----------|----------|-----------|---|-----------|-----------|-----------|
| H | 50.894934 | 3.699955 | 59.506278 | H | 17.034610 | 5.043821  | 18.026662 |
| H | 53.331535 | 3.325382 | 59.581268 | H | 10.176547 | 4.915072  | 24.089446 |
| H | 54.727793 | 3.865573 | 57.623256 | H | 8.847927  | 4.915173  | 39.653379 |
| H | 50.047717 | 5.460507 | 55.146286 | H | 7.520456  | 4.915050  | 55.216666 |
| H | 51.425072 | 5.978864 | 53.243679 | H | 12.998637 | 5.198788  | 65.268991 |
| H | 48.379273 | 2.740275 | 53.463931 | H | 28.618505 | 5.198767  | 65.268128 |
| H | 48.457699 | 2.295408 | 51.048854 | H | 44.238385 | 5.198699  | 65.266999 |
| H | 47.117599 | 3.614942 | 49.504061 | H | 48.274069 | 5.043586  | 18.026026 |
| H | 45.144285 | 6.329468 | 53.954930 | C | 33.296150 | 9.414126  | 42.638061 |
| H | 43.822357 | 7.618304 | 52.381330 | C | 33.734725 | 9.813469  | 41.282701 |
| H | 42.889759 | 7.347701 | 58.273372 | C | 32.943916 | 10.818819 | 40.462947 |
| H | 43.595165 | 3.515549 | 55.368780 | C | 31.860811 | 11.554159 | 41.275055 |
| H | 48.405468 | 6.745011 | 61.407907 | C | 31.105232 | 10.619788 | 42.230816 |
| H | 49.459606 | 7.763887 | 48.228859 | C | 32.057716 | 10.008139 | 43.269662 |
| H | 47.571264 | 6.941904 | 49.535567 | O | 33.069462 | 8.547633  | 41.517110 |
| H | 44.382340 | 4.363449 | 60.399525 | C | 36.687423 | 8.444696  | 39.218774 |
| H | 42.520044 | 3.570251 | 61.717943 | C | 37.838135 | 9.029240  | 38.649964 |
| H | 42.799651 | 3.651743 | 48.205783 | C | 37.882700 | 9.343987  | 37.289721 |
| H | 43.866725 | 7.244406 | 48.856535 | C | 36.784602 | 9.086167  | 36.459593 |
| H | 53.398211 | 5.961946 | 52.223871 | C | 35.636372 | 8.509466  | 37.018592 |
| H | 17.068429 | 7.157675 | 63.836093 | C | 35.580720 | 8.193482  | 38.377670 |
| H | 15.148291 | 6.357090 | 65.155566 | N | 36.626100 | 8.157747  | 40.579907 |
| H | 10.261750 | 3.422944 | 63.797744 | H | 33.648378 | 11.544878 | 40.018565 |
| H | 32.688664 | 7.157203 | 63.835293 | H | 34.795675 | 9.681383  | 41.035154 |
| H | 30.768269 | 6.356964 | 65.154712 | H | 34.052212 | 9.028529  | 43.334948 |
| H | 25.878604 | 3.428723 | 63.795722 | H | 31.157552 | 12.054450 | 40.585175 |
| H | 48.307414 | 7.159322 | 63.833715 | H | 32.336607 | 12.358520 | 41.870546 |
| H | 46.387847 | 6.357470 | 65.153444 | H | 30.303859 | 11.175056 | 42.750577 |
| H | 41.497144 | 3.431315 | 63.794112 | H | 30.615961 | 9.809989  | 41.659334 |
| H | 54.922516 | 4.682818 | 55.325530 | H | 32.388268 | 10.785391 | 43.987133 |
| H | 56.250054 | 4.683211 | 39.763397 | H | 31.552774 | 9.222802  | 43.860807 |
| H | 57.578864 | 4.683551 | 24.200319 | H | 32.487654 | 10.274587 | 39.615393 |
| H | 32.654273 | 5.043692 | 18.026504 | H | 38.709185 | 9.227133  | 39.284251 |

|   |           |          |           |   |           |          |           |
|---|-----------|----------|-----------|---|-----------|----------|-----------|
| H | 38.791733 | 9.794795 | 36.875892 | C | 18.992915 | 2.941012 | 21.873981 |
| H | 36.820794 | 9.337496 | 35.395476 | C | 19.081890 | 2.638017 | 20.519979 |
| H | 34.765796 | 8.294648 | 36.389067 | C | 18.404876 | 3.417023 | 19.587993 |
| H | 34.680081 | 7.728104 | 38.790840 | C | 17.639888 | 4.497024 | 20.008011 |
| H | 35.999258 | 7.398839 | 40.858421 | C | 17.550913 | 4.800019 | 21.362013 |
| H | 37.525645 | 8.091438 | 41.049723 | C | 16.783924 | 5.881020 | 21.784030 |
|   |           |          |           | C | 16.107910 | 6.659026 | 20.850045 |
|   |           |          |           | C | 16.197885 | 6.355031 | 19.497042 |
|   |           |          |           | C | 16.963875 | 5.274030 | 19.076025 |
|   |           |          |           | O | 15.523872 | 7.185037 | 18.539057 |
|   |           |          |           | O | 18.566764 | 5.537286 | 24.110694 |
|   |           |          |           | O | 18.036393 | 3.394413 | 24.576951 |
|   |           |          |           | C | 18.271107 | 4.341673 | 23.745942 |
|   |           |          |           | C | 14.301000 | 5.801000 | 25.782000 |
|   |           |          |           | C | 13.829000 | 6.909000 | 26.476000 |
|   |           |          |           | C | 28.051766 | 7.316336 | 26.371830 |
|   |           |          |           | C | 27.201300 | 6.424477 | 25.727011 |
|   |           |          |           | C | 27.698234 | 5.262465 | 25.103148 |
|   |           |          |           | C | 29.094117 | 4.997753 | 25.154882 |
|   |           |          |           | C | 13.900000 | 3.935000 | 24.313000 |
|   |           |          |           | C | 28.737429 | 3.010229 | 23.804732 |
|   |           |          |           | C | 27.371765 | 3.236490 | 23.778964 |
|   |           |          |           | C | 26.826562 | 4.366181 | 24.429243 |
|   |           |          |           | O | 26.591709 | 2.300265 | 23.103594 |
|   |           |          |           | O | 16.595277 | 6.407599 | 25.850543 |
|   |           |          |           | O | 16.064202 | 4.266355 | 26.320377 |
|   |           |          |           | C | 15.738375 | 5.463420 | 25.985119 |
|   |           |          |           | C | 17.926888 | 5.822569 | 30.240392 |
|   |           |          |           | C | 18.905989 | 6.608549 | 30.875739 |
|   |           |          |           | C | 16.799549 | 5.374795 | 30.986684 |
|   |           |          |           | C | 15.734401 | 4.677881 | 30.377141 |
|   |           |          |           | C | 14.651498 | 4.240953 | 31.134132 |
|   |           |          |           | O | 18.429867 | 6.416975 | 27.981029 |

(*R,R*)-1-TS1(QM(B3LYP)/MM)

|    |           |          |           |
|----|-----------|----------|-----------|
| C  | 12.487000 | 7.261000 | 26.395000 |
| C  | 11.616000 | 6.503000 | 25.622000 |
| C  | 12.086000 | 5.395000 | 24.927000 |
| C  | 13.428000 | 5.043000 | 25.007000 |
| C  | 13.027000 | 3.179000 | 23.539000 |
| C  | 11.685000 | 3.529000 | 23.460000 |
| C  | 11.215000 | 4.638000 | 24.154000 |
| O  | 10.782000 | 2.793000 | 22.654000 |
| Cu | 18.543718 | 6.099330 | 26.016739 |
| Cu | 17.966260 | 3.708964 | 26.530400 |
| C  | 22.238265 | 3.999922 | 26.393549 |
| C  | 22.775082 | 3.220760 | 27.434817 |
| C  | 24.134118 | 2.934409 | 27.484596 |
| C  | 24.982389 | 3.412966 | 26.491520 |
| C  | 24.485629 | 4.166804 | 25.411935 |
| C  | 23.094424 | 4.450197 | 25.347346 |
| C  | 22.592748 | 5.141013 | 24.223458 |
| C  | 23.452864 | 5.577632 | 23.220706 |
| C  | 24.821933 | 5.337368 | 23.302038 |
| C  | 25.350259 | 4.622456 | 24.385501 |
| O  | 25.668060 | 5.774838 | 22.288833 |
| O  | 20.439316 | 5.548175 | 26.192323 |
| O  | 19.935546 | 3.397880 | 26.650487 |
| C  | 20.785075 | 4.334156 | 26.420297 |
| C  | 18.226927 | 4.022014 | 22.293999 |

|    |           |          |           |    |           |          |           |
|----|-----------|----------|-----------|----|-----------|----------|-----------|
| O  | 17.914143 | 4.268129 | 28.433208 | C  | 29.414002 | 7.052540 | 26.437834 |
| C  | 18.105305 | 5.482771 | 28.800326 | C  | 43.533930 | 6.863584 | 26.448658 |
| Cu | 34.226489 | 6.214181 | 25.943853 | C  | 42.730970 | 6.003734 | 25.711114 |
| Cu | 33.636730 | 3.857715 | 26.582603 | C  | 43.270450 | 4.874715 | 25.059941 |
| C  | 37.890896 | 4.045547 | 26.364343 | C  | 44.665580 | 4.620698 | 25.164408 |
| C  | 38.417578 | 3.362387 | 27.476284 | C  | 29.598449 | 3.872214 | 24.472131 |
| C  | 39.755444 | 2.992710 | 27.519143 | C  | 44.392586 | 2.692166 | 23.714771 |
| C  | 40.591638 | 3.292336 | 26.450155 | C  | 43.027114 | 2.911206 | 23.629026 |
| C  | 40.103909 | 3.955261 | 25.307678 | C  | 42.440199 | 4.006363 | 24.302264 |
| C  | 38.732011 | 4.319632 | 25.250539 | O  | 42.288505 | 1.993333 | 22.885886 |
| C  | 38.232699 | 4.915285 | 24.073545 | O  | 32.256651 | 6.539077 | 25.846029 |
| C  | 39.081317 | 5.177702 | 23.002151 | O  | 31.743301 | 4.417357 | 26.410058 |
| C  | 40.438090 | 4.870264 | 23.075991 | C  | 31.403051 | 5.600252 | 26.049733 |
| C  | 40.962324 | 4.252951 | 24.220410 | C  | 33.820412 | 6.173186 | 30.185976 |
| O  | 41.276295 | 5.152850 | 22.003208 | C  | 34.935044 | 6.820401 | 30.750592 |
| O  | 36.125708 | 5.630691 | 26.078152 | C  | 32.635520 | 6.024346 | 30.957439 |
| O  | 35.591769 | 3.521983 | 26.677679 | C  | 31.471742 | 5.441164 | 30.416898 |
| C  | 36.451893 | 4.424949 | 26.378737 | C  | 30.315906 | 5.337774 | 31.185681 |
| C  | 33.846854 | 4.021972 | 22.293718 | O  | 34.201641 | 6.621528 | 27.885793 |
| C  | 34.612831 | 2.940969 | 21.873683 | O  | 33.640301 | 4.514935 | 28.469055 |
| C  | 34.701781 | 2.637978 | 20.519678 | C  | 33.896827 | 5.739348 | 28.764364 |
| C  | 34.024753 | 3.416989 | 19.587708 | Cu | 49.687477 | 6.188798 | 25.996235 |
| C  | 33.259776 | 4.496991 | 20.007741 | Cu | 49.347628 | 3.765038 | 26.557890 |
| C  | 33.170826 | 4.799983 | 21.361747 | C  | 53.571003 | 4.464792 | 26.367939 |
| C  | 32.403848 | 5.880986 | 21.783781 | C  | 54.157058 | 3.947774 | 27.515902 |
| C  | 31.727821 | 6.658997 | 20.849810 | C  | 55.530059 | 3.732759 | 27.559826 |
| C  | 31.817771 | 6.355005 | 19.496805 | C  | 56.316002 | 4.036762 | 26.454787 |
| C  | 32.583748 | 5.274002 | 19.075771 | C  | 55.729946 | 4.554780 | 25.305823 |
| O  | 31.143743 | 7.185016 | 18.538835 | C  | 54.356947 | 4.768795 | 25.262899 |
| O  | 34.192589 | 5.580956 | 24.066141 | C  | 53.770890 | 5.287813 | 24.113936 |
| O  | 33.668066 | 3.459842 | 24.621499 | C  | 54.557834 | 5.591815 | 23.007897 |
| C  | 33.899942 | 4.373314 | 23.747185 | C  | 55.929834 | 5.377800 | 23.052821 |
| C  | 29.951926 | 5.886818 | 25.863114 | C  | 56.515889 | 4.858782 | 24.200784 |

|   |           |          |           |    |           |          |           |
|---|-----------|----------|-----------|----|-----------|----------|-----------|
| O | 56.643771 | 5.617805 | 21.841785 | C  | 10.287269 | 6.502976 | 41.186145 |
| O | 51.631437 | 5.830409 | 26.133752 | C  | 10.757253 | 5.394976 | 40.491133 |
| O | 51.338954 | 3.648180 | 26.629277 | C  | 12.099253 | 5.042971 | 40.571108 |
| C | 52.092358 | 4.659671 | 26.381404 | C  | 11.698221 | 3.178978 | 39.103109 |
| C | 49.466779 | 4.021876 | 22.293156 | C  | 10.356221 | 3.528983 | 39.024134 |
| C | 50.232745 | 2.940872 | 21.873104 | C  | 9.886237  | 4.637982 | 39.718146 |
| C | 50.321669 | 2.637885 | 20.519096 | O  | 9.453204  | 2.792989 | 38.218147 |
| C | 49.644627 | 3.416901 | 19.587140 | Cu | 17.245094 | 6.021688 | 41.553494 |
| C | 48.879661 | 4.496905 | 20.007192 | Cu | 16.609955 | 3.644815 | 42.059434 |
| C | 48.790737 | 4.799893 | 21.361200 | C  | 20.878339 | 3.828750 | 42.075959 |
| C | 48.023772 | 5.880897 | 21.783251 | C  | 21.363513 | 3.199044 | 43.236546 |
| C | 47.347731 | 6.658913 | 20.849295 | C  | 22.714066 | 2.901392 | 43.374577 |
| C | 47.437655 | 6.354926 | 19.496287 | C  | 23.603215 | 3.220636 | 42.353708 |
| C | 48.203620 | 5.273922 | 19.075235 | C  | 23.155434 | 3.817370 | 41.161027 |
| O | 46.763613 | 7.184943 | 18.538331 | C  | 21.773354 | 4.107246 | 41.007563 |
| O | 49.727166 | 5.586517 | 24.097154 | C  | 21.318670 | 4.642896 | 39.785383 |
| O | 49.390596 | 3.416388 | 24.602751 | C  | 22.216979 | 4.897310 | 38.752802 |
| C | 49.525222 | 4.364825 | 23.750028 | C  | 23.578824 | 4.655084 | 38.917236 |
| C | 45.478532 | 5.495167 | 25.937949 | C  | 24.058870 | 4.125214 | 40.119671 |
| C | 44.893868 | 6.615147 | 26.558097 | O  | 24.464540 | 4.925802 | 37.882105 |
| C | 45.213002 | 3.528833 | 24.462247 | O  | 19.131323 | 5.413198 | 41.732834 |
| O | 47.709352 | 6.312616 | 25.892647 | O  | 18.561391 | 3.284276 | 42.218668 |
| O | 47.395337 | 4.140289 | 26.411213 | C  | 19.438178 | 4.197243 | 42.009151 |
| C | 46.946866 | 5.299995 | 26.087140 | C  | 16.900247 | 4.007559 | 37.807435 |
| C | 49.155702 | 5.928958 | 30.228352 | C  | 17.584338 | 2.887515 | 37.302028 |
| C | 50.068413 | 6.790414 | 30.863813 | C  | 17.609319 | 2.624524 | 35.938578 |
| C | 48.053361 | 5.411468 | 30.966090 | C  | 16.947399 | 3.471029 | 35.055711 |
| C | 47.049256 | 4.632541 | 30.351700 | C  | 16.220761 | 4.587006 | 35.518847 |
| C | 45.989170 | 4.129569 | 31.099338 | C  | 16.180853 | 4.850006 | 36.914595 |
| O | 49.589254 | 6.532046 | 27.957209 | C  | 15.399413 | 5.925604 | 37.383084 |
| O | 49.294417 | 4.350669 | 28.451940 | C  | 14.715021 | 6.739048 | 36.488790 |
| C | 49.368064 | 5.584752 | 28.795374 | C  | 14.775515 | 6.515841 | 35.123496 |
| C | 11.158286 | 7.260970 | 41.959133 | C  | 15.534836 | 5.438891 | 34.613131 |



|    |           |          |           |    |           |          |           |
|----|-----------|----------|-----------|----|-----------|----------|-----------|
| O  | 14.082180 | 7.408381 | 34.308921 | Cu | 32.502092 | 4.874308 | 42.072855 |
| O  | 17.264110 | 5.474973 | 39.646306 | C  | 36.583430 | 3.948594 | 41.642145 |
| O  | 16.707912 | 3.334963 | 40.091662 | C  | 37.006740 | 3.459875 | 42.864597 |
| C  | 16.963702 | 4.286317 | 39.268078 | C  | 38.338360 | 3.009292 | 43.026363 |
| C  | 12.972270 | 5.800966 | 41.346096 | C  | 39.234943 | 3.069626 | 41.980651 |
| C  | 12.500286 | 6.908965 | 42.040108 | C  | 38.839997 | 3.535932 | 40.684414 |
| C  | 26.329117 | 7.240881 | 42.070190 | C  | 37.466207 | 3.928286 | 40.511988 |
| C  | 25.613348 | 6.219266 | 41.484184 | C  | 37.019736 | 4.267817 | 39.203902 |
| C  | 26.250231 | 5.046304 | 40.962636 | C  | 37.886141 | 4.281505 | 38.138044 |
| C  | 27.682991 | 4.949148 | 41.104667 | C  | 39.269286 | 4.021018 | 38.324184 |
| C  | 12.571237 | 3.934972 | 39.877096 | C  | 39.751246 | 3.642956 | 39.576776 |
| C  | 27.617930 | 2.791329 | 39.975915 | O  | 40.121543 | 4.137166 | 37.267123 |
| C  | 26.209344 | 2.884329 | 39.818785 | O  | 35.179999 | 5.761019 | 41.018175 |
| C  | 25.522153 | 3.991372 | 40.303021 | O  | 34.260047 | 4.040461 | 42.113025 |
| O  | 25.660629 | 1.810432 | 39.176863 | C  | 35.241821 | 4.638409 | 41.560028 |
| O  | 15.291238 | 6.378762 | 41.397069 | C  | 32.549386 | 5.594160 | 37.890523 |
| O  | 14.724043 | 4.243528 | 41.845810 | C  | 33.149550 | 4.391491 | 37.544332 |
| C  | 14.414625 | 5.450513 | 41.534136 | C  | 33.218055 | 3.987550 | 36.197537 |
| C  | 16.622105 | 5.769222 | 45.770906 | C  | 32.654632 | 4.765868 | 35.209289 |
| C  | 17.638811 | 6.513657 | 46.397708 | C  | 32.000599 | 6.006628 | 35.501046 |
| C  | 18.815026 | 6.905639 | 32.229727 | C  | 31.964637 | 6.432311 | 36.880888 |
| C  | 17.741850 | 6.429203 | 32.974365 | C  | 31.297861 | 7.654216 | 37.189225 |
| C  | 16.722153 | 5.665707 | 32.375202 | C  | 30.707607 | 8.406057 | 36.206029 |
| C  | 15.468357 | 5.397632 | 46.517296 | C  | 30.740765 | 7.997999 | 34.846060 |
| C  | 14.375014 | 4.739376 | 45.915757 | C  | 31.380518 | 6.817222 | 34.481932 |
| C  | 13.264619 | 4.379308 | 46.673561 | O  | 30.114255 | 8.873577 | 34.005384 |
| C  | 14.596438 | 4.483253 | 32.504287 | O  | 32.598392 | 7.106875 | 39.754814 |
| C  | 15.619025 | 5.204261 | 33.135371 | O  | 32.392140 | 4.893762 | 40.114107 |
| O  | 13.507834 | 4.040908 | 33.247744 | C  | 32.503431 | 5.903464 | 39.363338 |
| O  | 17.140657 | 6.336314 | 43.514619 | C  | 28.401823 | 6.039243 | 41.703486 |
| O  | 16.548465 | 4.206857 | 43.965705 | C  | 27.732146 | 7.164806 | 42.158707 |
| C  | 16.783248 | 5.414761 | 44.333010 | C  | 42.133679 | 6.701880 | 41.404793 |
| Cu | 32.319496 | 7.727795 | 41.643145 | C  | 41.385200 | 5.698553 | 40.803108 |

|    |           |          |           |   |           |          |           |
|----|-----------|----------|-----------|---|-----------|----------|-----------|
| C  | 41.984702 | 4.499621 | 40.368481 | C | 53.229054 | 5.591652 | 38.571278 |
| C  | 43.387801 | 4.329651 | 40.537785 | C | 54.601054 | 5.377632 | 38.616177 |
| C  | 28.332010 | 3.787837 | 40.591322 | C | 55.187129 | 4.858609 | 39.764128 |
| C  | 43.222422 | 2.184726 | 39.405996 | O | 55.314970 | 5.617639 | 37.405129 |
| C  | 41.849865 | 2.314125 | 39.289717 | O | 50.293010 | 5.833688 | 41.694444 |
| C  | 41.212347 | 3.480847 | 39.753727 | O | 50.014143 | 3.644762 | 42.166568 |
| O  | 41.160379 | 1.247666 | 38.719142 | C | 50.761936 | 4.662488 | 41.938979 |
| O  | 30.450690 | 7.180046 | 41.609680 | C | 48.250601 | 4.118364 | 37.774528 |
| O  | 30.519041 | 5.009155 | 42.145040 | C | 49.048186 | 3.075882 | 37.270076 |
| C  | 29.896464 | 6.061432 | 41.824747 | C | 49.099416 | 2.815044 | 35.907120 |
| C  | 32.148840 | 6.794541 | 45.824974 | C | 48.353670 | 3.587880 | 35.023581 |
| C  | 32.806712 | 7.821011 | 46.478320 | C | 47.517277 | 4.625006 | 35.485354 |
| C  | 34.903203 | 7.288319 | 32.057932 | C | 47.447089 | 4.880904 | 36.880877 |
| C  | 33.751555 | 7.135497 | 32.821027 | C | 46.554575 | 5.867393 | 37.348024 |
| C  | 32.605700 | 6.511746 | 32.292617 | C | 45.794252 | 6.609057 | 36.452664 |
| C  | 31.232444 | 5.943929 | 46.534019 | C | 45.883965 | 6.397540 | 35.087283 |
| C  | 30.468387 | 4.931011 | 45.885055 | C | 46.751486 | 5.404831 | 34.578378 |
| C  | 29.568720 | 4.161427 | 46.583166 | O | 45.108104 | 7.218441 | 34.271580 |
| C  | 30.290168 | 5.795841 | 32.500786 | O | 48.441192 | 5.624960 | 39.605782 |
| C  | 31.428125 | 6.383532 | 33.064584 | O | 48.153492 | 3.435219 | 40.063203 |
| O  | 29.123354 | 5.700083 | 33.248116 | C | 48.287516 | 4.406860 | 39.234019 |
| O  | 32.453273 | 7.639846 | 43.634599 | C | 44.145241 | 5.344922 | 41.196845 |
| O  | 32.600348 | 5.418255 | 43.959143 | C | 43.496283 | 6.527384 | 41.601539 |
| C  | 32.415485 | 6.601818 | 44.358735 | C | 43.994741 | 3.173900 | 40.004153 |
| Cu | 48.340218 | 6.177371 | 41.506314 | O | 46.353910 | 6.257774 | 41.330374 |
| Cu | 48.031193 | 3.741837 | 42.030633 | O | 46.081505 | 4.076600 | 41.821633 |
| C  | 52.242278 | 4.464620 | 41.931334 | C | 45.612506 | 5.216747 | 41.464688 |
| C  | 52.828353 | 3.947597 | 43.079285 | C | 47.786322 | 5.884563 | 45.727150 |
| C  | 54.201353 | 3.732577 | 43.123183 | C | 48.710850 | 6.755393 | 46.333952 |
| C  | 54.987278 | 4.036581 | 42.018131 | C | 49.938091 | 7.097268 | 32.212747 |
| C  | 54.401203 | 4.554604 | 40.869180 | C | 48.891423 | 6.554492 | 32.950614 |
| C  | 53.028203 | 4.768624 | 40.826281 | C | 47.937200 | 5.711850 | 32.349220 |
| C  | 52.442128 | 5.287648 | 39.677330 | C | 46.689462 | 5.391396 | 46.487596 |

|    |           |          |           |   |           |          |           |
|----|-----------|----------|-----------|---|-----------|----------|-----------|
| C  | 45.683955 | 4.590675 | 45.906512 | C | 16.334804 | 3.096251 | 52.812607 |
| C  | 44.624040 | 4.120833 | 46.676714 | C | 16.349246 | 2.827250 | 51.451108 |
| C  | 45.899720 | 4.381168 | 32.465674 | C | 15.653783 | 3.651261 | 50.574256 |
| C  | 46.861427 | 5.178132 | 33.101471 | C | 14.913652 | 4.757433 | 51.040478 |
| O  | 44.835508 | 3.870644 | 33.200652 | C | 14.887640 | 5.028893 | 52.435345 |
| O  | 48.189421 | 6.493700 | 43.461765 | C | 14.094747 | 6.094009 | 52.907334 |
| O  | 47.908430 | 4.306061 | 43.935989 | C | 13.384827 | 6.889687 | 52.016529 |
| C  | 47.975086 | 5.538772 | 44.291000 | C | 13.429455 | 6.657541 | 50.651667 |
| C  | 9.830848  | 7.260896 | 57.522290 | C | 14.198545 | 5.588871 | 50.137902 |
| C  | 8.959816  | 6.502907 | 56.749315 | O | 12.714528 | 7.536467 | 49.841059 |
| C  | 9.429783  | 5.394908 | 56.054291 | O | 15.942185 | 5.637769 | 55.203660 |
| C  | 10.771783 | 5.042898 | 56.134241 | O | 15.429270 | 3.474180 | 55.583015 |
| C  | 10.370718 | 3.178911 | 54.666243 | C | 15.670990 | 4.452973 | 54.789258 |
| C  | 9.028718  | 3.528920 | 54.587293 | C | 11.644816 | 5.800887 | 56.909216 |
| C  | 8.558750  | 4.637919 | 55.281317 | C | 11.172849 | 6.908886 | 57.603240 |
| O  | 8.125684  | 2.792932 | 53.781319 | C | 25.331566 | 7.059548 | 57.499123 |
| Cu | 15.898099 | 6.124595 | 57.131801 | C | 24.494219 | 6.215463 | 56.780260 |
| Cu | 15.338396 | 3.714002 | 57.555355 | C | 25.000150 | 5.088992 | 56.099932 |
| C  | 19.597681 | 4.015577 | 57.442983 | C | 26.394229 | 4.815871 | 56.161189 |
| C  | 20.144592 | 3.255730 | 58.493042 | C | 11.243751 | 3.934900 | 55.440217 |
| C  | 21.495982 | 2.933511 | 58.511508 | C | 26.055812 | 2.916854 | 54.685572 |
| C  | 22.324374 | 3.354069 | 57.476652 | C | 24.690987 | 3.149648 | 54.649035 |
| C  | 21.815511 | 4.092062 | 56.391107 | C | 24.137453 | 4.238665 | 55.359033 |
| C  | 20.432639 | 4.416753 | 56.362255 | O | 23.919431 | 2.254543 | 53.911359 |
| C  | 19.916048 | 5.099468 | 55.240626 | O | 13.942528 | 6.425726 | 56.973989 |
| C  | 20.755035 | 5.477700 | 54.196832 | O | 13.432406 | 4.266345 | 57.373584 |
| C  | 22.118033 | 5.194933 | 54.240448 | C | 13.091876 | 5.471803 | 57.087181 |
| C  | 22.660418 | 4.495713 | 55.327431 | C | 15.283046 | 5.695821 | 61.352095 |
| O  | 22.944237 | 5.579470 | 53.190399 | C | 16.314087 | 6.385804 | 61.978046 |
| O  | 17.800415 | 5.575036 | 57.293790 | C | 17.553380 | 6.848847 | 47.742581 |
| O  | 17.302572 | 3.407207 | 57.673164 | C | 16.448292 | 6.453117 | 48.486768 |
| C  | 18.148211 | 4.353662 | 57.481276 | C | 15.395272 | 5.727845 | 47.897366 |
| C  | 15.629344 | 4.200964 | 53.323187 | C | 14.198081 | 5.242825 | 62.095148 |

|    |           |          |           |   |           |          |           |
|----|-----------|----------|-----------|---|-----------|----------|-----------|
| C  | 13.166040 | 4.552842 | 61.469196 | C | 29.906118 | 5.462946 | 50.119614 |
| C  | 12.083075 | 4.099846 | 62.213249 | O | 28.185934 | 7.190356 | 49.781554 |
| C  | 13.212428 | 4.657044 | 48.037379 | O | 31.527229 | 5.625025 | 55.206241 |
| C  | 14.266057 | 5.339897 | 48.660434 | O | 31.105451 | 3.442222 | 55.591459 |
| O  | 12.098501 | 4.286124 | 48.782349 | C | 31.322367 | 4.426013 | 54.796379 |
| O  | 15.768142 | 6.370167 | 59.106458 | C | 27.239356 | 5.659129 | 56.936552 |
| O  | 15.278586 | 4.201100 | 59.480606 | C | 26.689985 | 6.786219 | 57.575696 |
| C  | 15.449934 | 5.405264 | 59.892696 | C | 40.904290 | 6.945442 | 57.547925 |
| Cu | 31.486357 | 6.114262 | 57.132594 | C | 40.083744 | 6.109878 | 56.802533 |
| Cu | 30.988223 | 3.690875 | 57.564854 | C | 40.606059 | 4.998647 | 56.108932 |
| C  | 35.231531 | 4.071836 | 57.472571 | C | 42.002880 | 4.737742 | 56.176856 |
| C  | 35.782704 | 3.366829 | 58.558246 | C | 26.907800 | 3.732889 | 55.419864 |
| C  | 37.129823 | 3.029314 | 58.579880 | C | 41.692482 | 2.856136 | 54.674377 |
| C  | 37.949441 | 3.378258 | 57.512572 | C | 40.325677 | 3.078404 | 54.627782 |
| C  | 37.437406 | 4.065482 | 56.395353 | C | 39.756135 | 4.153793 | 55.346627 |
| C  | 36.058680 | 4.408040 | 56.365207 | O | 39.568501 | 2.182820 | 53.876075 |
| C  | 35.537813 | 5.042122 | 55.218097 | O | 29.516725 | 6.369165 | 57.000119 |
| C  | 36.368966 | 5.352320 | 54.145929 | O | 29.072898 | 4.190282 | 57.372776 |
| C  | 37.729054 | 5.053647 | 54.188739 | C | 28.695127 | 5.388831 | 57.109645 |
| C  | 38.276506 | 4.404548 | 55.304530 | C | 30.903120 | 5.695641 | 61.351269 |
| O  | 38.547526 | 5.374799 | 53.111804 | C | 31.934175 | 6.385618 | 61.977205 |
| O  | 33.406602 | 5.601870 | 57.279276 | C | 32.633054 | 8.006870 | 47.867293 |
| O  | 32.952618 | 3.431365 | 57.698677 | C | 31.780665 | 7.192461 | 48.580918 |
| C  | 33.778342 | 4.390774 | 57.493226 | C | 31.032577 | 6.146318 | 47.947532 |
| C  | 31.344016 | 4.169939 | 53.331972 | C | 29.818167 | 5.242646 | 62.094340 |
| C  | 32.206878 | 3.177318 | 52.834097 | C | 28.786113 | 4.552669 | 61.468405 |
| C  | 32.330138 | 2.962220 | 51.467448 | C | 27.703159 | 4.099675 | 62.212476 |
| C  | 31.586777 | 3.726761 | 50.574587 | C | 29.380984 | 4.338625 | 47.978662 |
| C  | 30.678409 | 4.702937 | 51.030108 | C | 30.101039 | 5.316334 | 48.661418 |
| C  | 30.547536 | 4.922826 | 52.427433 | O | 28.490570 | 3.552975 | 48.646681 |
| C  | 29.609761 | 5.869484 | 52.884995 | O | 31.372729 | 6.365207 | 59.104455 |
| C  | 28.843039 | 6.591068 | 51.976937 | O | 30.908164 | 4.191734 | 59.487329 |
| C  | 28.979769 | 6.403698 | 50.611549 | C | 31.068563 | 5.399806 | 59.894159 |

|    |           |          |           |   |           |          |           |
|----|-----------|----------|-----------|---|-----------|----------|-----------|
| Cu | 47.047012 | 6.240783 | 57.142256 | O | 45.072486 | 6.385149 | 57.009322 |
| Cu | 46.688604 | 3.785857 | 57.534565 | O | 44.742063 | 4.180381 | 57.346706 |
| C  | 50.914829 | 4.464394 | 57.493750 | C | 44.302079 | 5.364351 | 57.109038 |
| C  | 51.500923 | 3.947364 | 58.641689 | C | 46.523195 | 5.695406 | 61.350162 |
| C  | 52.873923 | 3.732339 | 58.685563 | C | 47.554262 | 6.385378 | 61.976082 |
| C  | 53.659830 | 4.036343 | 57.580498 | C | 48.591518 | 7.104644 | 47.672517 |
| C  | 53.073736 | 4.554373 | 56.431559 | C | 47.542261 | 6.597995 | 48.429727 |
| C  | 51.700736 | 4.768398 | 56.388685 | C | 46.580127 | 5.742128 | 47.860280 |
| C  | 51.114643 | 5.287428 | 55.239746 | C | 45.438253 | 5.242413 | 62.093251 |
| C  | 51.901549 | 5.591433 | 54.133681 | C | 44.406185 | 4.552442 | 61.467332 |
| C  | 53.273549 | 5.377407 | 54.178555 | C | 43.323243 | 4.099449 | 62.211421 |
| C  | 53.859642 | 4.858378 | 55.326493 | C | 44.538668 | 4.426186 | 48.033157 |
| O  | 53.987445 | 5.617415 | 52.967495 | C | 45.505252 | 5.242723 | 48.636170 |
| O  | 48.988622 | 5.854618 | 57.295805 | O | 43.476456 | 3.946300 | 48.790846 |
| O  | 48.674513 | 3.651360 | 57.672758 | O | 46.915121 | 6.440480 | 59.117990 |
| C  | 49.437655 | 4.669504 | 57.497448 | O | 46.572589 | 4.236649 | 59.462374 |
| C  | 46.981985 | 4.331210 | 53.313195 | C | 46.673465 | 5.442307 | 59.889194 |
| C  | 47.813233 | 3.310774 | 52.815919 | C | 16.262162 | 6.620790 | 63.347051 |
| C  | 47.865553 | 3.032010 | 51.457687 | C | 15.179196 | 6.168795 | 64.090104 |
| C  | 47.082247 | 3.760008 | 50.570602 | C | 14.147156 | 5.478812 | 63.465153 |
| C  | 46.219580 | 4.780222 | 51.022665 | C | 12.031150 | 4.336833 | 63.582254 |
| C  | 46.161042 | 5.065801 | 52.413892 | C | 13.063191 | 5.025817 | 64.207206 |
| C  | 45.259350 | 6.047195 | 52.870903 | O | 10.943187 | 3.908837 | 64.361307 |
| C  | 44.468684 | 6.748614 | 51.968688 | C | 31.882275 | 6.620600 | 63.346211 |
| C  | 44.533533 | 6.497233 | 50.607852 | C | 30.799322 | 6.168606 | 64.089282 |
| C  | 45.414534 | 5.510975 | 50.109177 | C | 29.767267 | 5.478629 | 63.464346 |
| O  | 43.725142 | 7.277912 | 49.784680 | C | 27.651260 | 4.336658 | 63.581482 |
| O  | 47.122431 | 5.784093 | 55.205363 | C | 28.683314 | 5.025635 | 64.206417 |
| O  | 46.819056 | 3.577624 | 55.563407 | O | 26.563309 | 3.908663 | 64.360554 |
| C  | 46.972915 | 4.581372 | 54.779769 | C | 47.502389 | 6.620356 | 63.345091 |
| C  | 42.834008 | 5.582175 | 56.965362 | C | 46.419447 | 6.168363 | 64.088179 |
| C  | 42.264275 | 6.686535 | 57.627452 | C | 45.387379 | 5.478391 | 63.463260 |
| C  | 42.531978 | 3.669869 | 55.425949 | C | 43.271369 | 4.336426 | 63.580429 |

|   |           |          |           |   |           |          |           |
|---|-----------|----------|-----------|---|-----------|----------|-----------|
| C | 44.303437 | 5.025398 | 64.205349 | H | 35.300076 | 1.794681 | 20.190221 |
| O | 42.183431 | 3.908432 | 64.359519 | H | 34.100323 | 3.170786 | 18.536506 |
| H | 12.119162 | 8.126838 | 26.936090 | H | 32.260926 | 6.142272 | 22.825877 |
| H | 10.573005 | 6.786705 | 25.566697 | H | 31.124213 | 7.499586 | 21.163979 |
| H | 13.382328 | 2.322275 | 22.983087 | H | 30.060408 | 7.749451 | 26.959419 |
| H | 9.847310  | 3.169200 | 22.676938 | H | 43.098623 | 7.731622 | 26.933204 |
| H | 22.129558 | 2.850134 | 28.223398 | H | 41.679131 | 6.240375 | 25.640858 |
| H | 24.535126 | 2.342875 | 28.301415 | H | 30.657812 | 3.647125 | 24.427195 |
| H | 26.035591 | 3.176885 | 26.565426 | H | 44.819100 | 1.850574 | 23.185405 |
| H | 21.534704 | 5.340057 | 24.091723 | H | 35.834318 | 6.964955 | 30.162049 |
| H | 23.043655 | 6.108159 | 22.371730 | H | 31.435427 | 5.068057 | 29.397742 |
| H | 19.533319 | 2.330567 | 22.589828 | H | 29.432553 | 4.892553 | 30.747694 |
| H | 19.679989 | 1.794557 | 20.190458 | H | 31.288891 | 6.859366 | 17.596503 |
| H | 18.480875 | 3.171002 | 18.536742 | H | 40.796890 | 5.636928 | 21.258651 |
| H | 16.652969 | 6.146000 | 22.827113 | H | 41.308181 | 2.214888 | 22.850767 |
| H | 15.507330 | 7.501810 | 21.163907 | H | 53.552165 | 3.699251 | 28.381138 |
| H | 14.495468 | 7.508117 | 27.087714 | H | 55.987742 | 3.326023 | 28.455692 |
| H | 27.649315 | 8.213581 | 26.830725 | H | 57.384042 | 3.866297 | 26.497915 |
| H | 26.146608 | 6.659967 | 25.703148 | H | 52.703551 | 5.455750 | 24.017529 |
| H | 14.941168 | 3.632679 | 24.315200 | H | 54.081447 | 5.977249 | 22.117120 |
| H | 29.132241 | 2.145162 | 23.288740 | H | 50.777401 | 2.334493 | 22.589083 |
| H | 19.755678 | 6.977649 | 30.312064 | H | 50.920712 | 1.795110 | 20.189787 |
| H | 15.711485 | 4.474097 | 29.312015 | H | 49.720280 | 3.170735 | 18.535991 |
| H | 13.849524 | 3.705768 | 30.644187 | H | 47.865573 | 6.135759 | 22.823882 |
| H | 15.672431 | 6.862013 | 17.596227 | H | 46.741572 | 7.497571 | 21.163651 |
| H | 25.178301 | 6.297757 | 21.578256 | H | 45.507248 | 7.301959 | 27.130798 |
| H | 25.611338 | 2.525384 | 23.109486 | H | 46.274297 | 3.308439 | 24.468635 |
| H | 37.778333 | 3.121909 | 28.318569 | H | 50.896160 | 7.212131 | 30.304547 |
| H | 40.148331 | 2.471466 | 28.386181 | H | 47.057074 | 4.412719 | 29.289615 |
| H | 41.627616 | 2.988622 | 26.516670 | H | 45.233591 | 3.533739 | 30.605564 |
| H | 37.185681 | 5.176377 | 23.958891 | H | 46.907376 | 6.858156 | 17.596208 |
| H | 38.675456 | 5.636467 | 22.110806 | H | 56.056768 | 5.973391 | 21.101840 |
| H | 35.154770 | 2.334181 | 22.591120 | H | 10.790737 | 8.127277 | 42.499574 |

|                                |                                |
|--------------------------------|--------------------------------|
| H 9.244446 6.787003 41.130261  | H 33.703610 3.041662 35.936765 |
| H 12.054389 2.324855 38.543613 | H 32.709260 4.400587 34.178835 |
| H 8.520518 3.174044 38.235215  | H 31.256717 7.988029 38.224925 |
| H 20.685424 2.958791 44.047989 | H 30.187087 9.338249 36.442518 |
| H 23.077157 2.429703 44.282202 | H 28.304901 7.989414 42.588691 |
| H 24.650198 2.983901 42.497189 | H 41.652559 7.620105 41.724834 |
| H 20.268929 4.857794 39.607722 | H 40.327707 5.876541 40.662996 |
| H 21.844959 5.301009 37.820691 | H 29.413279 3.694794 40.686756 |
| H 18.114128 2.224130 37.976398 | H 43.695561 1.292513 39.017095 |
| H 18.149252 1.762144 35.561239 | H 33.472781 8.475825 45.910697 |
| H 16.992052 3.234882 34.001928 | H 35.771924 7.783392 32.480083 |
| H 15.292587 6.148335 38.438630 | H 33.757386 7.525235 33.831083 |
| H 14.121320 7.565488 36.856188 | H 30.587188 4.763465 44.815261 |
| H 13.168997 7.507346 42.649692 | H 28.986542 3.395727 46.056234 |
| H 25.806218 8.122096 42.455183 | H 28.390433 5.206270 32.759660 |
| H 24.526313 6.331395 41.418469 | H 30.082751 8.555662 33.089872 |
| H 13.612347 3.635283 39.865154 | H 39.657851 4.550106 36.520478 |
| H 28.115413 1.903281 39.576343 | H 40.161856 1.387160 38.692041 |
| H 18.510519 6.825488 45.832926 | H 52.222917 3.698864 43.943969 |
| H 19.584110 7.503675 32.708003 | H 54.658980 3.325514 44.018903 |
| H 17.706067 6.675203 34.027190 | H 56.055274 3.865870 42.061068 |
| H 14.353351 4.505412 44.856732 | H 51.375233 5.456861 39.580712 |
| H 12.440493 3.872705 46.190045 | H 52.752707 5.977009 37.680366 |
| H 12.854973 3.507419 32.693241 | H 49.646957 2.474062 37.944680 |
| H 14.146843 7.181016 33.331351 | H 49.726242 2.013189 35.530691 |
| H 24.012494 5.357477 37.089333 | H 48.422215 3.355452 33.970336 |
| H 24.704793 1.906733 39.042535 | H 46.417586 6.072980 38.403322 |
| H 36.312789 3.457397 43.709439 | H 45.116350 7.368207 36.819369 |
| H 38.665465 2.630910 44.000321 | H 44.060357 7.319797 42.081140 |
| H 40.266478 2.742819 42.146612 | H 45.066067 3.016576 40.018875 |
| H 35.969930 4.518081 39.042662 | H 49.535468 7.159209 45.757024 |
| H 37.518505 4.531430 37.136597 | H 50.655757 7.755005 32.692389 |
| H 33.554040 3.755750 38.334282 | H 48.823197 6.810601 33.999402 |

|                                |                                |
|--------------------------------|--------------------------------|
| H 45.693062 4.326471 44.854333 | H 35.154318 3.080143 59.394134 |
| H 43.866370 3.506553 46.209562 | H 37.541814 2.489886 59.426535 |
| H 44.232853 3.281166 32.645891 | H 38.991913 3.093860 57.559779 |
| H 45.201284 7.001995 33.293784 | H 34.487392 5.298888 55.128274 |
| H 54.726507 5.965274 36.662451 | H 35.946437 5.838331 53.276937 |
| H 9.463459 8.127206 58.062743  | H 32.803557 2.582662 53.516845 |
| H 7.917054 6.786970 56.693379  | H 33.011340 2.203543 51.095460 |
| H 10.726981 2.324881 54.106681 | H 31.715422 3.535195 49.517442 |
| H 7.193814 3.175995 53.795754  | H 29.447055 6.057092 53.941420 |
| H 19.511848 2.921789 59.307805 | H 28.122225 7.314871 52.334390 |
| H 21.905671 2.354635 59.332902 | H 27.326647 7.449449 58.150713 |
| H 23.371099 3.084948 57.522800 | H 40.482006 7.800538 58.065704 |
| H 18.862438 5.339965 55.146126 | H 39.031508 6.351387 56.759562 |
| H 20.335533 6.000984 53.348347 | H 27.967033 3.506899 55.379916 |
| H 16.883309 2.444081 53.483094 | H 42.105709 2.033220 54.106510 |
| H 16.902684 1.974586 51.071126 | H 32.788710 6.738067 61.409705 |
| H 15.685995 3.405248 49.522471 | H 33.178850 8.804896 48.380708 |
| H 14.000197 6.323226 53.962665 | H 31.671228 7.365649 49.656094 |
| H 12.784010 7.709915 52.386185 | H 28.750498 4.373932 60.399915 |
| H 11.840682 7.508973 58.212354 | H 26.897911 3.573974 61.718632 |
| H 24.922579 7.928565 58.004220 | H 28.081713 2.926804 48.026887 |
| H 23.442578 6.461910 56.745119 | H 28.304836 6.980868 48.801700 |
| H 12.284916 3.635685 55.428365 | H 38.051107 5.867002 52.383772 |
| H 26.457285 2.083507 54.124445 | H 38.590617 2.416173 53.855355 |
| H 17.168871 6.738432 61.410903 | H 50.894947 3.699484 59.506164 |
| H 18.349891 7.416235 48.213280 | H 53.331511 3.325288 59.581232 |
| H 16.415749 6.730850 49.531614 | H 54.727792 3.865562 57.623229 |
| H 13.129687 4.375046 60.400686 | H 50.047798 5.460577 55.145945 |
| H 11.277998 3.573907 61.719496 | H 51.425149 5.977650 53.243104 |
| H 11.426950 3.767036 48.236495 | H 48.426826 2.729625 53.495382 |
| H 12.774566 7.306945 48.863802 | H 48.513378 2.243374 51.088961 |
| H 22.449469 6.099904 52.481318 | H 47.144016 3.505437 49.522265 |
| H 22.943557 2.497089 53.895214 | H 45.141637 6.281244 53.923000 |



|   |           |          |           |                                     |           |           |           |
|---|-----------|----------|-----------|-------------------------------------|-----------|-----------|-----------|
| H | 43.782040 | 7.504148 | 52.326794 | C                                   | 35.185496 | 8.867515  | 40.495495 |
| H | 42.889069 | 7.350568 | 58.214500 | C                                   | 35.453101 | 10.159885 | 39.783917 |
| H | 43.593400 | 3.453353 | 55.393298 | C                                   | 36.209697 | 11.184610 | 40.643505 |
| H | 48.405443 | 6.744580 | 61.407664 | C                                   | 35.608674 | 11.306006 | 42.051729 |
| H | 49.316075 | 7.772348 | 48.127359 | C                                   | 35.627339 | 9.952047  | 42.774799 |
| H | 47.478776 | 6.892656 | 49.468558 | O                                   | 33.638797 | 9.141225  | 41.586233 |
| H | 44.381996 | 4.363190 | 60.399584 | C                                   | 37.874549 | 7.934693  | 39.077344 |
| H | 42.519478 | 3.571111 | 61.717949 | C                                   | 39.198047 | 8.407130  | 39.123183 |
| H | 42.865919 | 3.342663 | 48.260352 | C                                   | 39.927687 | 8.593405  | 37.946453 |
| H | 43.786096 | 7.018841 | 48.815001 | C                                   | 39.346104 | 8.324325  | 36.702625 |
| H | 53.398602 | 5.963928 | 52.224474 | C                                   | 38.022627 | 7.869116  | 36.651063 |
| H | 17.068482 | 7.157617 | 63.836093 | C                                   | 37.289406 | 7.673640  | 37.824220 |
| H | 15.148272 | 6.357112 | 65.155559 | N                                   | 37.120538 | 7.765233  | 40.259307 |
| H | 10.261870 | 3.422484 | 63.798018 | H                                   | 35.991437 | 9.944944  | 38.843602 |
| H | 32.688418 | 7.157673 | 63.835188 | H                                   | 34.762994 | 8.030508  | 39.943253 |
| H | 30.768132 | 6.357162 | 65.154664 | H                                   | 35.086425 | 7.857285  | 42.427875 |
| H | 25.879087 | 3.427627 | 63.796077 | H                                   | 36.206378 | 12.163569 | 40.132064 |
| H | 48.307482 | 7.159214 | 63.833732 | H                                   | 37.271262 | 10.878733 | 40.724222 |
| H | 46.387827 | 6.357443 | 65.153444 | H                                   | 36.166309 | 12.055409 | 42.641769 |
| H | 41.497971 | 3.429464 | 63.794675 | H                                   | 34.565215 | 11.663052 | 41.980273 |
| H | 54.922506 | 4.682760 | 55.325534 | H                                   | 36.672924 | 9.650217  | 42.988481 |
| H | 56.250046 | 4.683075 | 39.763397 | H                                   | 35.106714 | 10.013238 | 43.747246 |
| H | 57.578863 | 4.683490 | 24.200302 | H                                   | 34.469929 | 10.563299 | 39.478186 |
| H | 32.654171 | 5.043665 | 18.026504 | H                                   | 39.666510 | 8.607850  | 40.092987 |
| H | 17.034675 | 5.043858 | 18.026668 | H                                   | 40.963702 | 8.941379  | 38.004942 |
| H | 10.176536 | 4.915034 | 24.089515 | H                                   | 39.920024 | 8.470629  | 35.782542 |
| H | 8.847970  | 4.915261 | 39.653287 | H                                   | 37.549952 | 7.662661  | 35.684770 |
| H | 7.520547  | 4.915265 | 55.216398 | H                                   | 36.258526 | 7.309808  | 37.774158 |
| H | 12.998687 | 5.198806 | 65.268987 | H                                   | 36.589694 | 6.878915  | 40.349924 |
| H | 28.618493 | 5.198861 | 65.268098 | H                                   | 37.675791 | 7.902426  | 41.104447 |
| H | 44.238361 | 5.198783 | 65.266977 |                                     |           |           |           |
| H | 48.273891 | 5.043409 | 18.026042 | ( <i>R,R</i> )-1-Int1(QM(B3LYP)/MM) |           |           |           |
| C | 34.967561 | 8.846720 | 41.956163 | C                                   | 12.487000 | 7.261000  | 26.395000 |

|    |           |          |           |    |           |          |           |
|----|-----------|----------|-----------|----|-----------|----------|-----------|
| C  | 11.616000 | 6.503000 | 25.622000 | O  | 15.523872 | 7.185037 | 18.539057 |
| C  | 12.086000 | 5.395000 | 24.927000 | O  | 18.566867 | 5.529630 | 24.111016 |
| C  | 13.428000 | 5.043000 | 25.007000 | O  | 18.023068 | 3.388865 | 24.570326 |
| C  | 13.027000 | 3.179000 | 23.539000 | C  | 18.264899 | 4.337454 | 23.743465 |
| C  | 11.685000 | 3.529000 | 23.460000 | C  | 14.301000 | 5.801000 | 25.782000 |
| C  | 11.215000 | 4.638000 | 24.154000 | C  | 13.829000 | 6.909000 | 26.476000 |
| O  | 10.782000 | 2.793000 | 22.654000 | C  | 28.021199 | 7.174712 | 26.466282 |
| Cu | 18.541005 | 6.085547 | 26.019072 | C  | 27.171709 | 6.306698 | 25.787129 |
| Cu | 17.952304 | 3.697441 | 26.526471 | C  | 27.671539 | 5.165157 | 25.127232 |
| C  | 22.218138 | 3.963576 | 26.392874 | C  | 29.068273 | 4.899079 | 25.175052 |
| C  | 22.749609 | 3.184297 | 27.436449 | C  | 13.900000 | 3.935000 | 24.313000 |
| C  | 24.106882 | 2.885553 | 27.482722 | C  | 28.715845 | 2.960227 | 23.751745 |
| C  | 24.958091 | 3.351830 | 26.485100 | C  | 27.350933 | 3.185520 | 23.730352 |
| C  | 24.464012 | 4.106708 | 25.403980 | C  | 26.803103 | 4.292545 | 24.417520 |
| C  | 23.074193 | 4.401754 | 25.343125 | O  | 26.575441 | 2.270739 | 23.022203 |
| C  | 22.576100 | 5.089841 | 24.215871 | O  | 16.592685 | 6.402792 | 25.852021 |
| C  | 23.436848 | 5.518355 | 23.208793 | O  | 16.053524 | 4.263613 | 26.321043 |
| C  | 24.804000 | 5.269994 | 23.287917 | C  | 15.733683 | 5.460916 | 25.984876 |
| C  | 25.329214 | 4.553561 | 24.372984 | C  | 17.923420 | 5.802433 | 30.237103 |
| O  | 25.651769 | 5.701147 | 22.273383 | C  | 18.906488 | 6.584482 | 30.870694 |
| O  | 20.435127 | 5.524410 | 26.197811 | C  | 16.796475 | 5.357804 | 30.984231 |
| O  | 19.918955 | 3.374875 | 26.645635 | C  | 15.725262 | 4.668871 | 30.376182 |
| C  | 20.771989 | 4.307335 | 26.419216 | C  | 14.641583 | 4.232146 | 31.134056 |
| C  | 18.226927 | 4.022014 | 22.293999 | O  | 18.425286 | 6.399434 | 27.984244 |
| C  | 18.992915 | 2.941012 | 21.873981 | O  | 17.904642 | 4.251133 | 28.432477 |
| C  | 19.081890 | 2.638017 | 20.519979 | C  | 18.097412 | 5.464570 | 28.800139 |
| C  | 18.404876 | 3.417023 | 19.587993 | Cu | 34.183736 | 6.119025 | 26.005245 |
| C  | 17.639888 | 4.497024 | 20.008011 | Cu | 33.620026 | 3.737715 | 26.564834 |
| C  | 17.550913 | 4.800019 | 21.362013 | C  | 37.869834 | 3.986729 | 26.375881 |
| C  | 16.783924 | 5.881020 | 21.784030 | C  | 38.396831 | 3.282890 | 27.474228 |
| C  | 16.107910 | 6.659026 | 20.850045 | C  | 39.742103 | 2.937671 | 27.520812 |
| C  | 16.197885 | 6.355031 | 19.497042 | C  | 40.585187 | 3.280940 | 26.469041 |
| C  | 16.963875 | 5.274030 | 19.076025 | C  | 40.095310 | 3.963911 | 25.338748 |

|   |           |          |           |    |           |          |           |
|---|-----------|----------|-----------|----|-----------|----------|-----------|
| C | 38.716552 | 4.306855 | 25.279671 | O  | 42.271368 | 2.048041 | 22.906111 |
| C | 38.218908 | 4.924438 | 24.113343 | O  | 32.214143 | 6.427886 | 25.911281 |
| C | 39.071937 | 5.230465 | 23.055697 | O  | 31.718911 | 4.286265 | 26.413948 |
| C | 40.431823 | 4.939539 | 23.130555 | C  | 31.370527 | 5.476623 | 26.088518 |
| C | 40.956309 | 4.299452 | 24.263263 | C  | 33.757985 | 5.920884 | 30.246000 |
| O | 41.273369 | 5.259549 | 22.070924 | C  | 34.799065 | 6.690703 | 30.797714 |
| O | 36.090258 | 5.554975 | 26.130365 | C  | 32.638904 | 5.580536 | 31.056704 |
| O | 35.579976 | 3.418910 | 26.647054 | C  | 31.530366 | 4.880404 | 30.537105 |
| C | 36.428909 | 4.343684 | 26.387627 | C  | 30.443217 | 4.572520 | 31.351618 |
| C | 33.846854 | 4.021972 | 22.293718 | O  | 34.140415 | 6.459722 | 27.964015 |
| C | 34.612831 | 2.940969 | 21.873683 | O  | 33.622380 | 4.324151 | 28.471587 |
| C | 34.701781 | 2.637978 | 20.519678 | C  | 33.845740 | 5.542401 | 28.810118 |
| C | 34.024753 | 3.416989 | 19.587708 | Cu | 49.700141 | 6.207575 | 25.980832 |
| C | 33.259776 | 4.496991 | 20.007741 | Cu | 49.346534 | 3.791293 | 26.560551 |
| C | 33.170826 | 4.799983 | 21.361747 | C  | 53.571003 | 4.464792 | 26.367939 |
| C | 32.403848 | 5.880986 | 21.783781 | C  | 54.157058 | 3.947774 | 27.515902 |
| C | 31.727821 | 6.658997 | 20.849810 | C  | 55.530059 | 3.732759 | 27.559826 |
| C | 31.817771 | 6.355005 | 19.496805 | C  | 56.316002 | 4.036762 | 26.454787 |
| C | 32.583748 | 5.274002 | 19.075771 | C  | 55.729946 | 4.554780 | 25.305823 |
| O | 31.143743 | 7.185016 | 18.538835 | C  | 54.356947 | 4.768795 | 25.262899 |
| O | 34.162978 | 5.545891 | 24.103370 | C  | 53.770890 | 5.287813 | 24.113936 |
| O | 33.652866 | 3.405857 | 24.595376 | C  | 54.557834 | 5.591815 | 23.007897 |
| C | 33.879930 | 4.345752 | 23.750071 | C  | 55.929834 | 5.377800 | 23.052821 |
| C | 29.922427 | 5.762612 | 25.916003 | C  | 56.515889 | 4.858782 | 24.200784 |
| C | 29.383588 | 6.908012 | 26.529164 | O  | 56.643771 | 5.617805 | 21.841785 |
| C | 43.549375 | 6.898537 | 26.487857 | O  | 51.642672 | 5.838949 | 26.127013 |
| C | 42.735479 | 6.038763 | 25.759858 | O  | 51.338324 | 3.661582 | 26.634248 |
| C | 43.270083 | 4.916598 | 25.092428 | C  | 52.096362 | 4.667229 | 26.380447 |
| C | 44.668874 | 4.667356 | 25.175299 | C  | 49.466779 | 4.021876 | 22.293156 |
| C | 29.574601 | 3.800110 | 24.451687 | C  | 50.232745 | 2.940872 | 21.873104 |
| C | 44.380974 | 2.748001 | 23.713349 | C  | 50.321669 | 2.637885 | 20.519096 |
| C | 43.014643 | 2.962119 | 23.648518 | C  | 49.644627 | 3.416901 | 19.587140 |
| C | 42.433023 | 4.050963 | 24.337522 | C  | 48.879661 | 4.496905 | 20.007192 |

|    |           |          |           |   |           |          |           |
|----|-----------|----------|-----------|---|-----------|----------|-----------|
| C  | 48.790737 | 4.799893 | 21.361200 | C | 20.882005 | 3.859849 | 42.086796 |
| C  | 48.023772 | 5.880897 | 21.783251 | C | 21.338337 | 3.174692 | 43.227660 |
| C  | 47.347731 | 6.658913 | 20.849295 | C | 22.684318 | 2.861612 | 43.380907 |
| C  | 47.437655 | 6.354926 | 19.496287 | C | 23.599134 | 3.217649 | 42.394810 |
| C  | 48.203620 | 5.273922 | 19.075235 | C | 23.181620 | 3.873379 | 41.221634 |
| O  | 46.763613 | 7.184943 | 18.538331 | C | 21.803501 | 4.184743 | 41.054190 |
| O  | 49.738719 | 5.591850 | 24.085275 | C | 21.382646 | 4.778226 | 39.846567 |
| O  | 49.388331 | 3.427566 | 24.604383 | C | 22.306485 | 5.078770 | 38.848020 |
| C  | 49.528321 | 4.370170 | 23.746340 | C | 23.661212 | 4.812011 | 39.027049 |
| C  | 45.489980 | 5.537977 | 25.942993 | C | 24.109894 | 4.211957 | 40.209666 |
| C  | 44.912923 | 6.654505 | 26.575649 | O | 24.570478 | 5.118704 | 38.022835 |
| C  | 45.209176 | 3.583603 | 24.455339 | O | 19.132926 | 5.439097 | 41.731471 |
| O  | 47.720903 | 6.342657 | 25.876978 | O | 18.570283 | 3.307804 | 42.211888 |
| O  | 47.395650 | 4.176003 | 26.411962 | C | 19.443563 | 4.223995 | 42.004420 |
| C  | 46.954545 | 5.335584 | 26.081153 | C | 16.906896 | 4.010773 | 37.810476 |
| C  | 49.193466 | 5.991037 | 30.213388 | C | 17.602708 | 2.896260 | 37.309653 |
| C  | 50.127770 | 6.845494 | 30.826194 | C | 17.631427 | 2.630696 | 35.945859 |
| C  | 48.091309 | 5.503492 | 30.969836 | C | 16.963172 | 3.469068 | 35.058456 |
| C  | 47.066912 | 4.733823 | 30.378465 | C | 16.225487 | 4.579485 | 35.519129 |
| C  | 46.004240 | 4.260397 | 31.143681 | C | 16.179739 | 4.842805 | 36.915763 |
| O  | 49.604101 | 6.568142 | 27.938381 | C | 15.381740 | 5.907688 | 37.380758 |
| O  | 49.297833 | 4.393382 | 28.453837 | C | 14.690933 | 6.714781 | 36.484084 |
| C  | 49.382682 | 5.629761 | 28.784900 | C | 14.759440 | 6.494033 | 35.119777 |
| C  | 11.158286 | 7.260970 | 41.959133 | C | 15.531763 | 5.424546 | 34.611418 |
| C  | 10.287269 | 6.502976 | 41.186145 | O | 14.059371 | 7.380821 | 34.305508 |
| C  | 10.757253 | 5.394976 | 40.491133 | O | 17.264824 | 5.485181 | 39.639212 |
| C  | 12.099253 | 5.042971 | 40.571108 | O | 16.712277 | 3.345295 | 40.090198 |
| C  | 11.698221 | 3.178978 | 39.103109 | C | 16.966393 | 4.295140 | 39.265832 |
| C  | 10.356221 | 3.528983 | 39.024134 | C | 12.972270 | 5.800966 | 41.346096 |
| C  | 9.886237  | 4.637982 | 39.718146 | C | 12.500286 | 6.908965 | 42.040108 |
| O  | 9.453204  | 2.792989 | 38.218147 | C | 26.533421 | 7.057596 | 42.403616 |
| Cu | 17.241501 | 6.036945 | 41.546083 | C | 25.766348 | 6.116505 | 41.749316 |
| Cu | 16.615839 | 3.659841 | 42.056808 | C | 26.344264 | 4.963786 | 41.124995 |

|    |           |          |           |   |           |          |           |
|----|-----------|----------|-----------|---|-----------|----------|-----------|
| C  | 27.772531 | 4.795193 | 41.237840 | C | 39.128411 | 5.234507 | 38.765192 |
| C  | 12.571237 | 3.934972 | 39.877096 | C | 39.668822 | 4.427088 | 39.766501 |
| C  | 27.612666 | 2.750519 | 39.929658 | O | 39.945478 | 5.803709 | 37.835746 |
| C  | 26.205987 | 2.910422 | 39.806734 | O | 34.991822 | 5.409547 | 41.821988 |
| C  | 25.565888 | 3.999642 | 40.389745 | O | 34.220044 | 3.359834 | 42.228461 |
| O  | 25.611122 | 1.914062 | 39.086308 | C | 35.151227 | 4.173034 | 41.935613 |
| O  | 15.285141 | 6.385438 | 41.388429 | C | 32.721047 | 4.965344 | 38.041689 |
| O  | 14.725657 | 4.250481 | 41.846590 | C | 33.467221 | 3.850650 | 37.695292 |
| C  | 14.412868 | 5.454493 | 41.529824 | C | 33.599455 | 3.484383 | 36.340333 |
| C  | 16.627454 | 5.788161 | 45.760711 | C | 32.951727 | 4.203667 | 35.357165 |
| C  | 17.642660 | 6.538396 | 46.382440 | C | 32.142298 | 5.346404 | 35.660061 |
| C  | 18.817970 | 6.880438 | 32.225938 | C | 32.046142 | 5.741902 | 37.043999 |
| C  | 17.744556 | 6.406726 | 32.973664 | C | 31.233323 | 6.865717 | 37.374760 |
| C  | 16.721284 | 5.646829 | 32.374439 | C | 30.562004 | 7.559136 | 36.401687 |
| C  | 15.481144 | 5.407086 | 46.512151 | C | 30.651792 | 7.180210 | 35.035602 |
| C  | 14.386278 | 4.746924 | 45.915329 | C | 31.427649 | 6.088898 | 34.653367 |
| C  | 13.282441 | 4.373720 | 46.678102 | O | 29.924003 | 7.988404 | 34.208322 |
| C  | 14.589532 | 4.470455 | 32.504475 | O | 32.764563 | 6.499318 | 39.850571 |
| C  | 15.616346 | 5.187413 | 33.135249 | O | 32.449441 | 4.304020 | 40.272885 |
| O  | 13.501162 | 4.029488 | 33.249154 | C | 32.627551 | 5.289046 | 39.502721 |
| O  | 17.134179 | 6.356631 | 43.507081 | C | 28.541041 | 5.798795 | 41.914056 |
| O  | 16.557842 | 4.224184 | 43.963201 | C | 27.933560 | 6.914646 | 42.466287 |
| C  | 16.783951 | 5.434032 | 44.326317 | C | 42.205334 | 6.872666 | 42.214557 |
| Cu | 32.544664 | 7.264024 | 41.663507 | C | 41.399114 | 6.055545 | 41.428491 |
| Cu | 32.522556 | 4.342448 | 42.244788 | C | 41.955380 | 5.035491 | 40.630564 |
| C  | 36.545037 | 3.631734 | 41.767309 | C | 43.363604 | 4.830664 | 40.656886 |
| C  | 37.042673 | 2.760705 | 42.716594 | C | 28.373792 | 3.662259 | 40.614781 |
| C  | 38.416188 | 2.421868 | 42.715707 | C | 43.100904 | 3.053685 | 39.021144 |
| C  | 39.273905 | 2.963602 | 41.782677 | C | 41.727997 | 3.227796 | 39.005215 |
| C  | 38.802718 | 3.842361 | 40.752768 | C | 41.135261 | 4.226477 | 39.804362 |
| C  | 37.394387 | 4.139684 | 40.728007 | O | 40.992804 | 2.372784 | 38.189582 |
| C  | 36.887413 | 4.931877 | 39.658046 | O | 30.655887 | 6.799398 | 41.763502 |
| C  | 37.725712 | 5.458146 | 38.703617 | O | 30.579259 | 4.635766 | 42.334775 |

|    |           |          |           |   |           |          |           |
|----|-----------|----------|-----------|---|-----------|----------|-----------|
| C  | 30.032407 | 5.727977 | 42.006917 | C | 49.121660 | 2.982032 | 35.964015 |
| C  | 32.450026 | 6.542046 | 45.856840 | C | 48.396290 | 3.758355 | 35.066164 |
| C  | 33.274217 | 7.436596 | 46.512533 | C | 47.563980 | 4.805628 | 35.513446 |
| C  | 34.764470 | 7.092153 | 32.127464 | C | 47.478375 | 5.068312 | 36.908946 |
| C  | 33.682863 | 6.747521 | 32.930425 | C | 46.591133 | 6.066838 | 37.358690 |
| C  | 32.607937 | 5.996993 | 32.417815 | C | 45.851686 | 6.814648 | 36.449032 |
| C  | 31.382580 | 5.878036 | 46.547943 | C | 45.954006 | 6.594122 | 35.086552 |
| C  | 30.464531 | 5.015403 | 45.881153 | C | 46.812905 | 5.585569 | 34.592991 |
| C  | 29.430079 | 4.421018 | 46.562176 | O | 45.196222 | 7.419344 | 34.259178 |
| C  | 30.423302 | 4.956096 | 32.689268 | O | 48.435868 | 5.784696 | 39.665038 |
| C  | 31.494130 | 5.677631 | 33.230242 | O | 48.119434 | 3.591930 | 40.086744 |
| O  | 29.322051 | 4.659610 | 33.482073 | C | 48.269162 | 4.574157 | 39.274954 |
| O  | 32.787067 | 7.282447 | 43.638204 | C | 44.175600 | 5.648201 | 41.489799 |
| O  | 32.748948 | 5.062852 | 44.057839 | C | 43.579789 | 6.677772 | 42.239250 |
| C  | 32.679978 | 6.276433 | 44.398717 | C | 43.921017 | 3.840327 | 39.824565 |
| Cu | 48.396665 | 6.300381 | 41.583816 | O | 46.412793 | 6.459851 | 41.480703 |
| Cu | 48.016682 | 3.863616 | 42.057702 | O | 46.074919 | 4.265097 | 41.876932 |
| C  | 52.242278 | 4.464620 | 41.931334 | C | 45.641105 | 5.443950 | 41.616464 |
| C  | 52.828353 | 3.947597 | 43.079285 | C | 47.861159 | 5.935822 | 45.792557 |
| C  | 54.201353 | 3.732577 | 43.123183 | C | 48.824439 | 6.739398 | 46.429629 |
| C  | 54.987278 | 4.036581 | 42.018131 | C | 50.016371 | 7.174395 | 32.172478 |
| C  | 54.401203 | 4.554604 | 40.869180 | C | 48.967301 | 6.662746 | 32.930481 |
| C  | 53.028203 | 4.768624 | 40.826281 | C | 47.992051 | 5.828605 | 32.350455 |
| C  | 52.442128 | 5.287648 | 39.677330 | C | 46.725935 | 5.491793 | 46.524974 |
| C  | 53.229054 | 5.591652 | 38.571278 | C | 45.680930 | 4.770082 | 45.910581 |
| C  | 54.601054 | 5.377632 | 38.616177 | C | 44.583302 | 4.342631 | 46.653515 |
| C  | 55.187129 | 4.858609 | 39.764128 | C | 45.930286 | 4.536226 | 32.506076 |
| O  | 55.314970 | 5.617639 | 37.405129 | C | 46.911648 | 5.327656 | 33.120553 |
| O  | 50.338489 | 5.886306 | 41.720010 | O | 44.865389 | 4.053960 | 33.259086 |
| O  | 49.998209 | 3.702612 | 42.175703 | O | 48.299677 | 6.576451 | 43.548833 |
| C  | 50.772469 | 4.699939 | 41.949646 | O | 47.925684 | 4.392794 | 43.975672 |
| C  | 48.256208 | 4.297270 | 37.816198 | C | 48.044583 | 5.613345 | 44.355332 |
| C  | 49.051335 | 3.245871 | 37.325946 | C | 9.830848  | 7.260896 | 57.522290 |

|    |           |          |           |    |           |          |           |
|----|-----------|----------|-----------|----|-----------|----------|-----------|
| C  | 8.959816  | 6.502907 | 56.749315 | O  | 12.723895 | 7.524711 | 49.836146 |
| C  | 9.429783  | 5.394908 | 56.054291 | O  | 15.941089 | 5.642761 | 55.206557 |
| C  | 10.771783 | 5.042898 | 56.134241 | O  | 15.428636 | 3.478859 | 55.584991 |
| C  | 10.370718 | 3.178911 | 54.666243 | C  | 15.671739 | 4.457959 | 54.793441 |
| C  | 9.028718  | 3.528920 | 54.587293 | C  | 11.644816 | 5.800887 | 56.909216 |
| C  | 8.558750  | 4.637919 | 55.281317 | C  | 11.172849 | 6.908886 | 57.603240 |
| O  | 8.125684  | 2.792932 | 53.781319 | C  | 25.317185 | 7.079411 | 57.558387 |
| Cu | 15.892571 | 6.129113 | 57.135570 | C  | 24.479463 | 6.245554 | 56.825708 |
| Cu | 15.336776 | 3.718257 | 57.557746 | C  | 24.990069 | 5.137637 | 56.117911 |
| C  | 19.590647 | 4.027466 | 57.441808 | C  | 26.387662 | 4.874947 | 56.165058 |
| C  | 20.139638 | 3.263088 | 58.486987 | C  | 11.243751 | 3.934900 | 55.440217 |
| C  | 21.493968 | 2.949361 | 58.504205 | C  | 26.055805 | 3.009551 | 54.642730 |
| C  | 22.323244 | 3.384055 | 57.474489 | C  | 24.689322 | 3.227966 | 54.623157 |
| C  | 21.810178 | 4.126905 | 56.393467 | C  | 24.130456 | 4.296264 | 55.361240 |
| C  | 20.423547 | 4.439838 | 56.364746 | O  | 23.923249 | 2.340896 | 53.870891 |
| C  | 19.903904 | 5.119991 | 55.242836 | O  | 13.936631 | 6.427924 | 56.975039 |
| C  | 20.741511 | 5.515351 | 54.203052 | O  | 13.428930 | 4.268725 | 57.377123 |
| C  | 22.107119 | 5.248878 | 54.249066 | C  | 13.088397 | 5.472720 | 57.087646 |
| C  | 22.653514 | 4.546746 | 55.333291 | C  | 15.283046 | 5.695821 | 61.352095 |
| O  | 22.932301 | 5.650852 | 53.204605 | C  | 16.314087 | 6.385804 | 61.978046 |
| O  | 17.796243 | 5.583138 | 57.300418 | C  | 17.561855 | 6.869336 | 47.729617 |
| O  | 17.302248 | 3.413307 | 57.672312 | C  | 16.464285 | 6.463130 | 48.481202 |
| C  | 18.144614 | 4.361982 | 57.482272 | C  | 15.412745 | 5.732106 | 47.894850 |
| C  | 15.640629 | 4.204372 | 53.331730 | C  | 14.198081 | 5.242825 | 62.095148 |
| C  | 16.359339 | 3.106164 | 52.826302 | C  | 13.166040 | 4.552842 | 61.469196 |
| C  | 16.385778 | 2.839322 | 51.463603 | C  | 12.083075 | 4.099846 | 62.213249 |
| C  | 15.690899 | 3.659043 | 50.580626 | C  | 13.235852 | 4.644801 | 48.042867 |
| C  | 14.938121 | 4.758670 | 51.043648 | C  | 14.288800 | 5.333778 | 48.662236 |
| C  | 14.898697 | 5.026302 | 52.440115 | O  | 12.129439 | 4.262190 | 48.793123 |
| C  | 14.089462 | 6.081285 | 52.907184 | O  | 15.760635 | 6.374310 | 59.110960 |
| C  | 13.380728 | 6.875095 | 52.012272 | O  | 15.280820 | 4.203286 | 59.484350 |
| C  | 13.439659 | 6.648478 | 50.648152 | C  | 15.446887 | 5.407598 | 59.895730 |
| C  | 14.221054 | 5.586363 | 50.137745 | Cu | 31.474279 | 6.145566 | 57.138444 |

|    |           |          |           |    |           |          |           |
|----|-----------|----------|-----------|----|-----------|----------|-----------|
| Cu | 30.968633 | 3.721595 | 57.552473 | C  | 40.603974 | 5.025872 | 56.138085 |
| C  | 35.209866 | 4.088117 | 57.458246 | C  | 42.002767 | 4.764716 | 56.193007 |
| C  | 35.751466 | 3.365493 | 58.536839 | C  | 26.905259 | 3.816512 | 55.391698 |
| C  | 37.099113 | 3.026789 | 58.562870 | C  | 41.683130 | 2.912886 | 54.652960 |
| C  | 37.929344 | 3.392877 | 57.508334 | C  | 40.316577 | 3.133351 | 54.620195 |
| C  | 37.425467 | 4.098170 | 56.398084 | C  | 39.750285 | 4.195721 | 55.361781 |
| C  | 36.045224 | 4.439937 | 56.362839 | O  | 39.557673 | 2.250684 | 53.855690 |
| C  | 35.533711 | 5.086211 | 55.218408 | O  | 29.504281 | 6.409420 | 57.014829 |
| C  | 36.373284 | 5.415849 | 54.157267 | O  | 29.054305 | 4.229716 | 57.376541 |
| C  | 37.733557 | 5.120847 | 54.206962 | C  | 28.681571 | 5.430616 | 57.121563 |
| C  | 38.272941 | 4.454988 | 55.317919 | C  | 30.903120 | 5.695641 | 61.351269 |
| O  | 38.560338 | 5.461562 | 53.142280 | C  | 31.934175 | 6.385618 | 61.977205 |
| O  | 33.394547 | 5.625351 | 57.276093 | C  | 33.106267 | 7.665079 | 47.897083 |
| O  | 32.933425 | 3.452123 | 57.671139 | C  | 32.105506 | 7.025040 | 48.597334 |
| C  | 33.761060 | 4.410980 | 57.475680 | C  | 31.196960 | 6.120747 | 47.955832 |
| C  | 31.295403 | 4.234979 | 53.324925 | C  | 29.818167 | 5.242646 | 62.094340 |
| C  | 32.099723 | 3.196107 | 52.823374 | C  | 28.786113 | 4.552669 | 61.468405 |
| C  | 32.210205 | 2.979291 | 51.455247 | C  | 27.703159 | 4.099675 | 62.212476 |
| C  | 31.515406 | 3.790221 | 50.563277 | C  | 29.256995 | 4.628794 | 47.956525 |
| C  | 30.668499 | 4.819163 | 51.022636 | C  | 30.124504 | 5.467113 | 48.653993 |
| C  | 30.543825 | 5.035507 | 52.422700 | O  | 28.236605 | 4.007268 | 48.611685 |
| C  | 29.649337 | 6.023479 | 52.880369 | O  | 31.366724 | 6.380565 | 59.113218 |
| C  | 28.932512 | 6.797924 | 51.973083 | O  | 30.904188 | 4.204541 | 59.481237 |
| C  | 29.073818 | 6.620915 | 50.607737 | C  | 31.063894 | 5.409405 | 59.895328 |
| C  | 29.945186 | 5.629581 | 50.113222 | Cu | 47.048987 | 6.244385 | 57.149430 |
| O  | 28.339999 | 7.467450 | 49.782045 | Cu | 46.688733 | 3.789862 | 57.536779 |
| O  | 31.507076 | 5.673086 | 55.206761 | C  | 50.914829 | 4.464394 | 57.493750 |
| O  | 31.070215 | 3.490891 | 55.575542 | C  | 51.500923 | 3.947364 | 58.641689 |
| C  | 31.285939 | 4.480646 | 54.788528 | C  | 52.873923 | 3.732339 | 58.685563 |
| C  | 27.230218 | 5.704126 | 56.956354 | C  | 53.659830 | 4.036343 | 57.580498 |
| C  | 26.678842 | 6.813601 | 57.622880 | C  | 53.073736 | 4.554373 | 56.431559 |
| C  | 40.912483 | 6.945103 | 57.611651 | C  | 51.700736 | 4.768398 | 56.388685 |
| C  | 40.085211 | 6.123855 | 56.855795 | C  | 51.114643 | 5.287428 | 55.239746 |



|   |           |          |           |   |           |          |           |
|---|-----------|----------|-----------|---|-----------|----------|-----------|
| C | 51.901549 | 5.591433 | 54.133681 | C | 44.406185 | 4.552442 | 61.467332 |
| C | 53.273549 | 5.377407 | 54.178555 | C | 43.323243 | 4.099449 | 62.211421 |
| C | 53.859642 | 4.858378 | 55.326493 | C | 44.497768 | 4.612753 | 48.016762 |
| O | 53.987445 | 5.617415 | 52.967495 | C | 45.502294 | 5.356012 | 48.654391 |
| O | 48.992472 | 5.856373 | 57.300794 | O | 43.398305 | 4.175656 | 48.746884 |
| O | 48.676948 | 3.652321 | 57.668811 | O | 46.917668 | 6.441386 | 59.125117 |
| C | 49.440179 | 4.670381 | 57.496804 | O | 46.577964 | 4.237028 | 59.466911 |
| C | 46.958343 | 4.348887 | 53.320600 | C | 46.674831 | 5.442384 | 59.893497 |
| C | 47.780011 | 3.327322 | 52.811093 | C | 16.262162 | 6.620790 | 63.347051 |
| C | 47.825382 | 3.063216 | 51.448779 | C | 15.179196 | 6.168795 | 64.090104 |
| C | 47.048804 | 3.809935 | 50.569659 | C | 14.147156 | 5.478812 | 63.465153 |
| C | 46.197873 | 4.834553 | 51.035646 | C | 12.031150 | 4.336833 | 63.582254 |
| C | 46.138101 | 5.096709 | 52.432497 | C | 13.063191 | 5.025817 | 64.207206 |
| C | 45.233668 | 6.069166 | 52.903219 | O | 10.943187 | 3.908837 | 64.361307 |
| C | 44.449602 | 6.792455 | 52.011117 | C | 31.882275 | 6.620600 | 63.346211 |
| C | 44.526507 | 6.574953 | 50.646234 | C | 30.799322 | 6.168606 | 64.089282 |
| C | 45.404706 | 5.592876 | 50.131766 | C | 29.767267 | 5.478629 | 63.464346 |
| O | 43.732712 | 7.384708 | 49.837444 | C | 27.651260 | 4.336658 | 63.581482 |
| O | 47.119184 | 5.792284 | 55.211222 | C | 28.683314 | 5.025635 | 64.206417 |
| O | 46.811675 | 3.585518 | 55.563773 | O | 26.563309 | 3.908663 | 64.360554 |
| C | 46.962128 | 4.591992 | 54.784206 | C | 47.502389 | 6.620356 | 63.345091 |
| C | 42.838408 | 5.593344 | 56.992114 | C | 46.419447 | 6.168363 | 64.088179 |
| C | 42.274027 | 6.685354 | 57.678079 | C | 45.387379 | 5.478391 | 63.463260 |
| C | 42.526894 | 3.713060 | 55.416331 | C | 43.271369 | 4.336426 | 63.580429 |
| O | 45.073265 | 6.391576 | 57.021074 | C | 44.303437 | 5.025398 | 64.205349 |
| O | 44.740521 | 4.186605 | 57.355219 | O | 42.183431 | 3.908432 | 64.359519 |
| C | 44.303101 | 5.371693 | 57.122718 | H | 12.119370 | 8.127103 | 26.935477 |
| C | 46.523195 | 5.695406 | 61.350162 | H | 10.572727 | 6.787268 | 25.566452 |
| C | 47.554262 | 6.385378 | 61.976082 | H | 13.377754 | 2.322876 | 22.980214 |
| C | 48.702647 | 7.067445 | 47.774274 | H | 9.846122  | 3.167855 | 22.675435 |
| C | 47.614518 | 6.605435 | 48.507003 | H | 22.102474 | 2.821734 | 28.228025 |
| C | 46.615308 | 5.815505 | 47.905011 | H | 24.504043 | 2.292665 | 28.300132 |
| C | 45.438253 | 5.242413 | 62.093251 | H | 26.009213 | 3.104639 | 26.555995 |

|   |           |          |           |   |           |          |           |
|---|-----------|----------|-----------|---|-----------|----------|-----------|
| H | 21.519485 | 5.291053 | 24.085747 | H | 35.645955 | 6.979279 | 30.183997 |
| H | 23.030247 | 6.048983 | 22.359269 | H | 31.478944 | 4.575232 | 29.498659 |
| H | 19.532148 | 2.329264 | 22.590171 | H | 29.606512 | 4.032809 | 30.929808 |
| H | 19.679021 | 1.794023 | 20.190610 | H | 31.291248 | 6.863217 | 17.594900 |
| H | 18.480548 | 3.170353 | 18.536430 | H | 40.796501 | 5.750651 | 21.329269 |
| H | 16.650249 | 6.140419 | 22.827024 | H | 41.288726 | 2.263069 | 22.885737 |
| H | 15.505628 | 7.501824 | 21.158911 | H | 53.552148 | 3.699851 | 28.381689 |
| H | 14.495782 | 7.508469 | 27.087682 | H | 55.987724 | 3.326094 | 28.455521 |
| H | 27.618183 | 8.056914 | 26.952720 | H | 57.384426 | 3.866088 | 26.498127 |
| H | 26.117482 | 6.545711 | 25.764969 | H | 52.704036 | 5.448100 | 24.015384 |
| H | 14.941677 | 3.638871 | 24.310055 | H | 54.083195 | 5.976006 | 22.116677 |
| H | 29.108464 | 2.114211 | 23.204351 | H | 50.778385 | 2.335037 | 22.589416 |
| H | 19.756287 | 6.952473 | 30.305618 | H | 50.920987 | 1.795422 | 20.189901 |
| H | 15.698463 | 4.474061 | 29.310672 | H | 49.720850 | 3.170558 | 18.535633 |
| H | 13.836722 | 3.701636 | 30.644881 | H | 47.862913 | 6.130289 | 22.823632 |
| H | 15.670377 | 6.862986 | 17.594960 | H | 46.740238 | 7.497712 | 21.158846 |
| H | 25.169504 | 6.227671 | 21.560124 | H | 45.533270 | 7.339930 | 27.143323 |
| H | 25.594119 | 2.493335 | 23.030786 | H | 46.271551 | 3.373026 | 24.442585 |
| H | 37.753609 | 3.008177 | 28.303520 | H | 50.956491 | 7.246041 | 30.251969 |
| H | 40.135207 | 2.400661 | 28.377825 | H | 47.062109 | 4.500907 | 29.320220 |
| H | 41.626244 | 2.994563 | 26.538326 | H | 45.234801 | 3.669170 | 30.667358 |
| H | 37.168790 | 5.166703 | 23.996965 | H | 46.912735 | 6.863905 | 17.594429 |
| H | 38.666968 | 5.706887 | 22.173891 | H | 56.063092 | 5.977865 | 21.099171 |
| H | 35.151422 | 2.330072 | 22.590899 | H | 10.790899 | 8.127462 | 42.499104 |
| H | 35.298699 | 1.793815 | 20.190412 | H | 9.244091  | 6.787402 | 41.130360 |
| H | 34.100181 | 3.170182 | 18.536189 | H | 12.049826 | 2.325142 | 38.541278 |
| H | 32.261822 | 6.137874 | 22.825956 | H | 8.517974  | 3.169198 | 38.238704 |
| H | 31.123245 | 7.500060 | 21.159045 | H | 20.640888 | 2.898646 | 44.011522 |
| H | 30.028761 | 7.587662 | 27.075446 | H | 23.023271 | 2.344811 | 44.272902 |
| H | 43.119565 | 7.763134 | 26.982939 | H | 24.640620 | 2.962839 | 42.549125 |
| H | 41.681012 | 6.270420 | 25.708440 | H | 20.339150 | 5.000813 | 39.652300 |
| H | 30.634321 | 3.583016 | 24.399260 | H | 21.959578 | 5.530938 | 37.929141 |
| H | 44.798925 | 1.912701 | 23.168287 | H | 18.138062 | 2.239313 | 37.986620 |

|   |           |          |           |   |           |          |           |
|---|-----------|----------|-----------|---|-----------|----------|-----------|
| H | 18.179153 | 1.771996 | 35.571806 | H | 34.062606 | 7.949857 | 45.954894 |
| H | 17.010888 | 3.230430 | 34.005029 | H | 35.578163 | 7.681075 | 32.538197 |
| H | 15.266442 | 6.122985 | 38.436023 | H | 33.685938 | 7.085654 | 33.959240 |
| H | 14.084172 | 7.533922 | 36.845217 | H | 30.573044 | 4.816173 | 44.814977 |
| H | 13.169252 | 7.508328 | 42.649159 | H | 28.730295 | 3.770235 | 46.024332 |
| H | 26.054240 | 7.927751 | 42.863351 | H | 28.639167 | 4.087164 | 33.007570 |
| H | 24.684361 | 6.277134 | 41.708001 | H | 29.960940 | 7.710102 | 33.280328 |
| H | 13.612641 | 3.640435 | 39.863317 | H | 39.416184 | 6.294644 | 37.186283 |
| H | 28.068624 | 1.883439 | 39.444305 | H | 39.997555 | 2.532695 | 38.235350 |
| H | 18.509178 | 6.858050 | 45.813242 | H | 52.223642 | 3.704278 | 43.946438 |
| H | 19.589194 | 7.476647 | 32.702581 | H | 54.659165 | 3.326852 | 44.019235 |
| H | 17.710857 | 6.652999 | 34.026775 | H | 56.055723 | 3.866048 | 42.061517 |
| H | 14.358603 | 4.524213 | 44.855267 | H | 51.375279 | 5.450197 | 39.581159 |
| H | 12.458986 | 3.863865 | 46.198051 | H | 52.754484 | 5.976134 | 37.680116 |
| H | 12.840750 | 3.500867 | 32.698673 | H | 49.632256 | 2.637188 | 38.010803 |
| H | 14.128624 | 7.157653 | 33.326865 | H | 49.745884 | 2.172618 | 35.599941 |
| H | 24.146979 | 5.599568 | 37.242811 | H | 48.478342 | 3.521114 | 34.014661 |
| H | 24.655327 | 2.044177 | 38.986345 | H | 46.443070 | 6.274365 | 38.411344 |
| H | 36.371321 | 2.372686 | 43.487306 | H | 45.177068 | 7.584170 | 36.798443 |
| H | 38.805577 | 1.743596 | 43.481554 | H | 44.191222 | 7.320358 | 42.863983 |
| H | 40.336777 | 2.707456 | 41.831309 | H | 44.989987 | 3.668214 | 39.773240 |
| H | 35.815604 | 5.121802 | 39.586035 | H | 49.679106 | 7.108693 | 45.872720 |
| H | 37.310035 | 6.055390 | 37.883102 | H | 50.750262 | 7.827026 | 32.633846 |
| H | 33.944307 | 3.262554 | 38.483479 | H | 48.913766 | 6.937014 | 33.975833 |
| H | 34.205188 | 2.613818 | 36.069245 | H | 45.688679 | 4.538701 | 44.852005 |
| H | 33.061938 | 3.872062 | 34.319743 | H | 43.796488 | 3.789414 | 46.159993 |
| H | 31.142402 | 7.175639 | 38.415499 | H | 44.241647 | 3.469443 | 32.722654 |
| H | 29.931061 | 8.417059 | 36.649513 | H | 45.305348 | 7.205576 | 33.282013 |
| H | 28.550220 | 7.676128 | 42.949872 | H | 54.733421 | 5.973037 | 36.660950 |
| H | 41.762734 | 7.658933 | 42.814879 | H | 9.463506  | 8.126829 | 58.063134 |
| H | 40.332825 | 6.232831 | 41.443582 | H | 7.916605  | 6.787083 | 56.694063 |
| H | 29.453241 | 3.522154 | 40.676701 | H | 10.722410 | 2.324956 | 54.104727 |
| H | 43.532240 | 2.289896 | 38.387653 | H | 7.190376  | 3.168797 | 53.802850 |

|   |           |          |           |   |           |          |           |
|---|-----------|----------|-----------|---|-----------|----------|-----------|
| H | 19.507729 | 2.919434 | 59.299049 | H | 28.248067 | 7.557075 | 52.327597 |
| H | 21.905318 | 2.366467 | 59.321703 | H | 27.314604 | 7.466896 | 58.211005 |
| H | 23.371960 | 3.121702 | 57.520799 | H | 40.494279 | 7.790324 | 58.148336 |
| H | 18.847866 | 5.342427 | 55.145215 | H | 39.032387 | 6.365988 | 56.824472 |
| H | 20.319110 | 6.038024 | 53.356380 | H | 27.966437 | 3.606819 | 55.338434 |
| H | 16.908211 | 2.457548 | 53.500662 | H | 42.089228 | 2.101518 | 54.064583 |
| H | 16.947931 | 1.990822 | 51.087584 | H | 32.788421 | 6.739923 | 61.409690 |
| H | 15.732494 | 3.414271 | 49.528554 | H | 33.775067 | 8.358457 | 48.417075 |
| H | 13.980761 | 6.300379 | 53.962388 | H | 32.001760 | 7.228669 | 49.667866 |
| H | 12.766892 | 7.688281 | 52.374810 | H | 28.749314 | 4.379529 | 60.400407 |
| H | 11.840497 | 7.509056 | 58.213286 | H | 26.897626 | 3.574621 | 61.720244 |
| H | 24.905777 | 7.934179 | 58.085088 | H | 27.739004 | 3.452013 | 47.989473 |
| H | 23.425585 | 6.485198 | 56.802431 | H | 28.479278 | 7.284617 | 48.799238 |
| H | 12.285084 | 3.640674 | 55.426536 | H | 38.073877 | 5.967243 | 52.416946 |
| H | 26.456873 | 2.194068 | 54.056523 | H | 38.575402 | 2.467686 | 53.862477 |
| H | 17.168825 | 6.739444 | 61.410817 | H | 50.895049 | 3.699562 | 59.506766 |
| H | 18.356642 | 7.441993 | 48.196360 | H | 53.331422 | 3.325561 | 59.581254 |
| H | 16.435669 | 6.738015 | 49.527246 | H | 54.728193 | 3.865562 | 57.623768 |
| H | 13.128508 | 4.380832 | 60.401068 | H | 50.048142 | 5.455201 | 55.146464 |
| H | 11.277598 | 3.574663 | 61.721067 | H | 51.426938 | 5.977204 | 53.243093 |
| H | 11.453286 | 3.742541 | 48.253335 | H | 48.392173 | 2.734790 | 53.482802 |
| H | 12.794754 | 7.302849 | 48.857450 | H | 48.464937 | 2.272584 | 51.070408 |
| H | 22.438971 | 6.174215 | 52.496703 | H | 47.106609 | 3.566435 | 49.518236 |
| H | 22.941328 | 2.559820 | 53.882015 | H | 45.108848 | 6.276190 | 53.959179 |
| H | 35.116591 | 3.066232 | 59.364051 | H | 43.761295 | 7.542138 | 52.376858 |
| H | 37.503289 | 2.473202 | 59.403970 | H | 42.902941 | 7.338242 | 58.274127 |
| H | 38.971600 | 3.107165 | 57.559593 | H | 43.588195 | 3.501968 | 55.373732 |
| H | 34.483020 | 5.334704 | 55.122664 | H | 48.406274 | 6.744633 | 61.408085 |
| H | 35.957353 | 5.912580 | 53.291892 | H | 49.455858 | 7.684667 | 48.252912 |
| H | 32.659413 | 2.563509 | 53.504071 | H | 47.550999 | 6.883618 | 49.550597 |
| H | 32.843585 | 2.181437 | 51.081393 | H | 44.382077 | 4.368277 | 60.399975 |
| H | 31.631070 | 3.593129 | 49.505157 | H | 42.519429 | 3.571442 | 61.719562 |
| H | 29.480882 | 6.200760 | 53.936406 | H | 42.760239 | 3.619636 | 48.196860 |

|   |           |           |           |                                   |           |           |           |
|---|-----------|-----------|-----------|-----------------------------------|-----------|-----------|-----------|
| H | 43.817511 | 7.167534  | 48.859142 | C                                 | 36.786934 | 9.086809  | 36.457240 |
| H | 53.405536 | 5.972351  | 52.223367 | C                                 | 35.633777 | 8.503824  | 37.017072 |
| H | 17.068094 | 7.157953  | 63.835986 | C                                 | 35.577577 | 8.175071  | 38.379192 |
| H | 15.148345 | 6.357534  | 65.155915 | N                                 | 36.631345 | 8.118329  | 40.584351 |
| H | 10.258596 | 3.420391  | 63.803975 | H                                 | 33.648714 | 11.553502 | 40.012804 |
| H | 32.688052 | 7.158042  | 63.835068 | H                                 | 34.801743 | 9.676458  | 41.037961 |
| H | 30.768378 | 6.357485  | 65.155053 | H                                 | 34.047067 | 9.020049  | 43.348172 |
| H | 25.877478 | 3.422597  | 63.802684 | H                                 | 31.153640 | 12.079623 | 40.591909 |
| H | 48.307555 | 7.158926  | 63.833660 | H                                 | 32.339407 | 12.376134 | 41.887744 |
| H | 46.388350 | 6.357497  | 65.153875 | H                                 | 30.287981 | 11.188682 | 42.759773 |
| H | 41.497299 | 3.423012  | 63.801422 | H                                 | 30.606732 | 9.817377  | 41.658752 |
| H | 54.923364 | 4.683318  | 55.324879 | H                                 | 32.388111 | 10.804053 | 43.995261 |
| H | 56.250908 | 4.683600  | 39.762528 | H                                 | 31.538922 | 9.234962  | 43.882355 |
| H | 57.579678 | 4.683861  | 24.199224 | H                                 | 32.472579 | 10.277658 | 39.619025 |
| H | 32.653505 | 5.044465  | 18.025502 | H                                 | 38.723897 | 9.213375  | 39.299293 |
| H | 17.033768 | 5.044633  | 18.025670 | H                                 | 38.802912 | 9.803974  | 36.881781 |
| H | 10.175615 | 4.914249  | 24.088542 | H                                 | 36.823575 | 9.346560  | 35.386573 |
| H | 8.847003  | 4.914442  | 39.652550 | H                                 | 34.753935 | 8.298570  | 36.384532 |
| H | 7.519560  | 4.914412  | 55.215976 | H                                 | 34.670474 | 7.706112  | 38.795763 |
| H | 12.997579 | 5.198435  | 65.269740 | H                                 | 35.999599 | 7.351535  | 40.869167 |
| H | 28.617624 | 5.198373  | 65.268908 | H                                 | 37.536538 | 8.067495  | 41.061867 |
| H | 44.237735 | 5.198152  | 65.267813 |                                   |           |           |           |
| H | 48.273515 | 5.044295  | 18.025049 |                                   |           |           |           |
| C | 33.286460 | 9.413129  | 42.646493 | ( <i>R,R</i> )-2-RC(QM(B3LYP)/MM) |           |           |           |
| C | 33.731135 | 9.815707  | 41.285721 | C                                 | 12.487000 | 7.261000  | 26.395000 |
| C | 32.939762 | 10.826940 | 40.467974 | C                                 | 11.616000 | 6.503000  | 25.622000 |
| C | 31.859313 | 11.569066 | 41.284398 | C                                 | 12.086000 | 5.395000  | 24.927000 |
| C | 31.097293 | 10.631972 | 42.237338 | C                                 | 13.428000 | 5.043000  | 25.007000 |
| C | 32.049854 | 10.018263 | 43.278879 | C                                 | 13.027000 | 3.179000  | 23.539000 |
| O | 33.050196 | 8.545316  | 41.517232 | C                                 | 11.685000 | 3.529000  | 23.460000 |
| C | 36.691654 | 8.419284  | 39.226159 | C                                 | 11.215000 | 4.638000  | 24.154000 |
| C | 37.847023 | 9.015610  | 38.658087 | O                                 | 10.782000 | 2.793000  | 22.654000 |
| C | 37.889687 | 9.341798  | 37.294153 | Cu                                | 18.544164 | 6.083752  | 26.015420 |
|   |           |           |           | Cu                                | 17.946616 | 3.696908  | 26.529265 |

|   |           |          |           |    |           |          |           |
|---|-----------|----------|-----------|----|-----------|----------|-----------|
| C | 22.209491 | 3.938305 | 26.374498 | C  | 29.009481 | 4.770253 | 25.123322 |
| C | 22.752658 | 3.180834 | 27.427770 | C  | 13.900000 | 3.935000 | 24.313000 |
| C | 24.104561 | 2.861751 | 27.453367 | C  | 28.686233 | 2.888494 | 23.622832 |
| C | 24.937950 | 3.288450 | 26.424704 | C  | 27.319386 | 3.108223 | 23.594046 |
| C | 24.431994 | 4.023102 | 25.335190 | C  | 26.758459 | 4.185455 | 24.316592 |
| C | 23.046926 | 4.334360 | 25.293920 | O  | 26.554180 | 2.214818 | 22.847346 |
| C | 22.531190 | 4.998498 | 24.160310 | O  | 16.596802 | 6.402782 | 25.849899 |
| C | 23.375097 | 5.384835 | 23.123852 | O  | 16.053551 | 4.264178 | 26.319729 |
| C | 24.741630 | 5.125387 | 23.184808 | C  | 15.735589 | 5.462045 | 25.984420 |
| C | 25.281570 | 4.435519 | 24.278719 | C  | 17.904585 | 5.823556 | 30.228161 |
| O | 25.573396 | 5.517610 | 22.141800 | C  | 18.896233 | 6.583785 | 30.874399 |
| O | 20.434440 | 5.513362 | 26.188206 | C  | 16.748225 | 5.421601 | 30.953636 |
| O | 19.907890 | 3.368599 | 26.651589 | C  | 15.672712 | 4.756017 | 30.327593 |
| C | 20.765269 | 4.294837 | 26.416046 | C  | 14.561117 | 4.361565 | 31.066027 |
| C | 18.226927 | 4.022014 | 22.293999 | O  | 18.431885 | 6.402275 | 27.975876 |
| C | 18.992915 | 2.941012 | 21.873981 | O  | 17.893272 | 4.258859 | 28.431198 |
| C | 19.081890 | 2.638017 | 20.519979 | C  | 18.093629 | 5.473402 | 28.794441 |
| C | 18.404876 | 3.417024 | 19.587993 | Cu | 34.102255 | 5.990715 | 26.088270 |
| C | 17.639888 | 4.497025 | 20.008011 | Cu | 33.554507 | 3.579779 | 26.533920 |
| C | 17.550913 | 4.800019 | 21.362013 | C  | 37.809217 | 3.886213 | 26.424333 |
| C | 16.783924 | 5.881020 | 21.784030 | C  | 38.329671 | 3.142137 | 27.498941 |
| C | 16.107910 | 6.659026 | 20.850045 | C  | 39.677597 | 2.812450 | 27.553162 |
| C | 16.197885 | 6.355032 | 19.497042 | C  | 40.529972 | 3.210033 | 26.529311 |
| C | 16.963876 | 5.274031 | 19.076025 | C  | 40.048860 | 3.933353 | 25.421384 |
| O | 15.523872 | 7.185038 | 18.539057 | C  | 38.668748 | 4.265570 | 25.356366 |
| O | 18.565413 | 5.527902 | 24.112105 | C  | 38.180599 | 4.933501 | 24.213878 |
| O | 18.019107 | 3.387724 | 24.573922 | C  | 39.045584 | 5.292729 | 23.184441 |
| C | 18.263557 | 4.335542 | 23.745622 | C  | 40.406061 | 5.003376 | 23.263360 |
| C | 14.301000 | 5.801000 | 25.782000 | C  | 40.919797 | 4.316258 | 24.371768 |
| C | 13.829000 | 6.909000 | 26.476000 | O  | 41.258532 | 5.370171 | 22.227823 |
| C | 27.937564 | 6.995170 | 26.483726 | O  | 36.010163 | 5.442052 | 26.218595 |
| C | 27.103333 | 6.152869 | 25.757303 | O  | 35.516646 | 3.279779 | 26.634368 |
| C | 27.614752 | 5.035197 | 25.065727 | C  | 36.360079 | 4.224661 | 26.430043 |

|   |           |          |           |    |           |          |           |
|---|-----------|----------|-----------|----|-----------|----------|-----------|
| C | 33.846855 | 4.021974 | 22.293721 | O  | 34.018739 | 6.240585 | 28.062037 |
| C | 34.612832 | 2.940971 | 21.873686 | O  | 33.514562 | 4.076508 | 28.454843 |
| C | 34.701783 | 2.637980 | 20.519681 | C  | 33.710795 | 5.279730 | 28.855414 |
| C | 34.024755 | 3.416991 | 19.587710 | Cu | 49.696873 | 6.206521 | 25.982856 |
| C | 33.259777 | 4.496993 | 20.007743 | Cu | 49.345882 | 3.789325 | 26.565682 |
| C | 33.170827 | 4.799985 | 21.361749 | C  | 53.571004 | 4.464799 | 26.367945 |
| C | 32.403849 | 5.880988 | 21.783783 | C  | 54.157059 | 3.947781 | 27.515908 |
| C | 31.727822 | 6.658998 | 20.849812 | C  | 55.530060 | 3.732767 | 27.559832 |
| C | 31.817772 | 6.355006 | 19.496807 | C  | 56.316003 | 4.036770 | 26.454793 |
| C | 32.583750 | 5.274004 | 19.075773 | C  | 55.729947 | 4.554788 | 25.305829 |
| O | 31.143744 | 7.185017 | 18.538837 | C  | 54.356948 | 4.768802 | 25.262905 |
| O | 34.113633 | 5.497600 | 24.161331 | C  | 53.770890 | 5.287820 | 24.113942 |
| O | 33.619387 | 3.334367 | 24.563517 | C  | 54.557834 | 5.591822 | 23.007903 |
| C | 33.849413 | 4.307301 | 23.758678 | C  | 55.929834 | 5.377808 | 23.052827 |
| C | 29.848466 | 5.605581 | 25.911848 | C  | 56.515890 | 4.858790 | 24.200790 |
| C | 29.296993 | 6.725234 | 26.560157 | O  | 56.643771 | 5.617813 | 21.841791 |
| C | 43.550075 | 6.892297 | 26.578103 | O  | 51.638298 | 5.837591 | 26.121435 |
| C | 42.723616 | 6.031976 | 25.866314 | O  | 51.335552 | 3.661119 | 26.635495 |
| C | 43.245602 | 4.914183 | 25.182765 | C  | 52.093473 | 4.666837 | 26.380159 |
| C | 44.644547 | 4.664519 | 25.237134 | C  | 49.466780 | 4.021882 | 22.293161 |
| C | 29.531611 | 3.702374 | 24.365901 | C  | 50.232747 | 2.940878 | 21.873109 |
| C | 44.329683 | 2.745835 | 23.783772 | C  | 50.321671 | 2.637891 | 20.519101 |
| C | 42.962044 | 2.963986 | 23.741488 | C  | 49.644629 | 3.416907 | 19.587145 |
| C | 42.394986 | 4.053657 | 24.439797 | C  | 48.879663 | 4.496911 | 20.007197 |
| O | 42.201916 | 2.056787 | 23.006425 | C  | 48.790739 | 4.799899 | 21.361205 |
| O | 32.135804 | 6.285020 | 25.973167 | C  | 48.023773 | 5.880903 | 21.783256 |
| O | 31.651851 | 4.118775 | 26.373198 | C  | 47.347732 | 6.658919 | 20.849300 |
| C | 31.297583 | 5.320368 | 26.094829 | C  | 47.437657 | 6.354932 | 19.496292 |
| C | 33.549814 | 5.577847 | 30.304366 | C  | 48.203622 | 5.273928 | 19.075240 |
| C | 34.565460 | 6.293163 | 30.964139 | O  | 46.763615 | 7.184949 | 18.538336 |
| C | 32.393149 | 5.176810 | 31.030126 | O  | 49.731242 | 5.591457 | 24.089656 |
| C | 31.306576 | 4.535551 | 30.398272 | O  | 49.385025 | 3.426357 | 24.609368 |
| C | 30.187512 | 4.157321 | 31.134043 | C  | 49.525162 | 4.368881 | 23.750088 |

|    |           |          |           |   |           |          |           |
|----|-----------|----------|-----------|---|-----------|----------|-----------|
| C  | 45.480880 | 5.536503 | 25.986966 | C | 24.048888 | 4.544598 | 39.811216 |
| C  | 44.914896 | 6.650696 | 26.633592 | O | 24.390243 | 5.636708 | 37.689608 |
| C  | 45.171843 | 3.579863 | 24.509339 | O | 19.134217 | 5.585620 | 41.619457 |
| O  | 47.717271 | 6.339248 | 25.887418 | O | 18.637935 | 3.432844 | 42.076844 |
| O  | 47.396237 | 4.171944 | 26.423352 | C | 19.482910 | 4.371782 | 41.848997 |
| C  | 46.950985 | 5.332938 | 26.101070 | C | 16.875477 | 4.126785 | 37.732928 |
| C  | 49.213658 | 5.997327 | 30.218046 | C | 17.586282 | 3.027994 | 37.218972 |
| C  | 50.161522 | 6.841331 | 30.824606 | C | 17.598979 | 2.763153 | 35.856486 |
| C  | 48.104581 | 5.531713 | 30.978121 | C | 16.899924 | 3.589262 | 34.983342 |
| C  | 47.072980 | 4.767326 | 30.392745 | C | 16.150487 | 4.686919 | 35.456114 |
| C  | 46.003887 | 4.318886 | 31.162072 | C | 16.118326 | 4.946383 | 36.852017 |
| O  | 49.611036 | 6.567936 | 27.937285 | C | 15.307869 | 5.994505 | 37.332543 |
| O  | 49.301356 | 4.394083 | 28.457123 | C | 14.590728 | 6.789907 | 36.447921 |
| C  | 49.393264 | 5.631197 | 28.787002 | C | 14.647508 | 6.575661 | 35.080759 |
| C  | 11.158284 | 7.260965 | 41.959133 | C | 15.434880 | 5.523924 | 34.559524 |
| C  | 10.287267 | 6.502972 | 41.186144 | O | 13.924792 | 7.453743 | 34.275974 |
| C  | 10.757252 | 5.394972 | 40.491132 | O | 17.229746 | 5.598727 | 39.569503 |
| C  | 12.099252 | 5.042967 | 40.571107 | O | 16.729888 | 3.443537 | 40.012026 |
| C  | 11.698220 | 3.178974 | 39.103108 | C | 16.950805 | 4.404613 | 39.190863 |
| C  | 10.356220 | 3.528979 | 39.024133 | C | 12.972269 | 5.800962 | 41.346096 |
| C  | 9.886236  | 4.637978 | 39.718145 | C | 12.500284 | 6.908961 | 42.040108 |
| O  | 9.453203  | 2.792985 | 38.218146 | C | 26.652481 | 6.969900 | 42.297039 |
| Cu | 17.230131 | 6.133776 | 41.480402 | C | 25.832343 | 6.195295 | 41.504756 |
| Cu | 16.672985 | 3.735835 | 41.979770 | C | 26.339748 | 5.107201 | 40.721654 |
| C  | 20.933278 | 4.033378 | 41.834938 | C | 27.753817 | 4.840458 | 40.799474 |
| C  | 21.455604 | 3.266556 | 42.892414 | C | 12.571236 | 3.934968 | 39.877095 |
| C  | 22.805640 | 2.944831 | 42.943014 | C | 27.477554 | 3.014068 | 39.214371 |
| C  | 23.659592 | 3.375855 | 41.934186 | C | 26.083363 | 3.269068 | 39.127441 |
| C  | 23.178892 | 4.124829 | 40.843902 | C | 25.506503 | 4.290986 | 39.876015 |
| C  | 21.795642 | 4.444754 | 40.779506 | O | 25.432794 | 2.417361 | 38.281545 |
| C  | 21.307855 | 5.131341 | 39.647654 | O | 15.269749 | 6.431198 | 41.359311 |
| C  | 22.176290 | 5.522584 | 38.632948 | O | 14.766097 | 4.281108 | 41.815141 |
| C  | 23.538105 | 5.246988 | 38.714954 | C | 14.421507 | 5.479750 | 41.508900 |



|    |           |          |           |   |           |          |           |
|----|-----------|----------|-----------|---|-----------|----------|-----------|
| C  | 16.699640 | 5.831206 | 45.705561 | C | 32.417184 | 3.267967 | 35.147896 |
| C  | 17.703878 | 6.603753 | 46.317618 | C | 31.713512 | 4.452527 | 35.542148 |
| C  | 18.786940 | 6.901097 | 32.222001 | C | 31.674199 | 4.761375 | 36.948393 |
| C  | 17.683661 | 6.467740 | 32.948790 | C | 30.918770 | 5.894743 | 37.368788 |
| C  | 16.653321 | 5.727637 | 32.337084 | C | 30.264464 | 6.688161 | 36.461861 |
| C  | 15.571479 | 5.420888 | 46.470109 | C | 30.337090 | 6.420445 | 35.069700 |
| C  | 14.488708 | 4.731029 | 45.884766 | C | 31.052801 | 5.322372 | 34.603421 |
| C  | 13.402958 | 4.334755 | 46.659827 | O | 29.664761 | 7.334683 | 34.308792 |
| C  | 14.490429 | 4.611508 | 32.434088 | O | 32.699886 | 5.437553 | 39.646198 |
| C  | 15.524454 | 5.302148 | 33.080251 | O | 32.286019 | 3.291882 | 40.166523 |
| O  | 13.375263 | 4.208869 | 33.160379 | C | 32.442725 | 4.237347 | 39.337082 |
| O  | 17.151543 | 6.432170 | 43.444494 | C | 28.582329 | 5.677078 | 41.619011 |
| O  | 16.643067 | 4.280097 | 43.891221 | C | 28.040845 | 6.723015 | 42.347331 |
| C  | 16.843495 | 5.492708 | 44.262596 | C | 42.281338 | 7.189724 | 42.155263 |
| Cu | 32.855507 | 6.216785 | 41.495720 | C | 41.459712 | 6.379284 | 41.380582 |
| Cu | 32.358956 | 3.747242 | 42.093164 | C | 41.988696 | 5.317209 | 40.620094 |
| C  | 36.541378 | 3.997526 | 41.768861 | C | 43.387237 | 5.068231 | 40.663121 |
| C  | 37.035693 | 3.131146 | 42.728690 | C | 28.285364 | 3.768632 | 40.024698 |
| C  | 38.410182 | 2.810869 | 42.760023 | C | 43.082174 | 3.255191 | 39.078229 |
| C  | 39.272385 | 3.334836 | 41.821727 | C | 41.713880 | 3.468067 | 39.052273 |
| C  | 38.812067 | 4.207873 | 40.783020 | C | 41.149217 | 4.507472 | 39.817455 |
| C  | 37.409115 | 4.543271 | 40.761988 | O | 40.953682 | 2.608106 | 38.264443 |
| C  | 36.933732 | 5.376258 | 39.709035 | O | 30.828061 | 6.433861 | 41.495463 |
| C  | 37.785093 | 5.854995 | 38.741653 | O | 30.451361 | 4.277430 | 42.003711 |
| C  | 39.172108 | 5.557178 | 38.773295 | C | 30.061737 | 5.443810 | 41.710663 |
| C  | 39.689305 | 4.743628 | 39.779234 | C | 32.304664 | 5.961967 | 45.713705 |
| O  | 39.996091 | 6.069853 | 37.817444 | C | 33.199677 | 6.847337 | 46.288584 |
| O  | 34.727926 | 5.524294 | 41.605162 | C | 34.474899 | 6.573088 | 32.321596 |
| O  | 34.290293 | 3.380531 | 42.120414 | C | 33.361496 | 6.156660 | 33.042963 |
| C  | 35.077757 | 4.329862 | 41.828920 | C | 32.307962 | 5.461741 | 32.419329 |
| C  | 32.350565 | 3.901566 | 37.877760 | C | 31.214000 | 5.422282 | 46.478090 |
| C  | 32.981486 | 2.747169 | 37.445276 | C | 30.220009 | 4.577494 | 45.905657 |
| C  | 33.019596 | 2.437491 | 36.069246 | C | 29.170028 | 4.105422 | 46.656088 |

|    |           |          |           |    |           |          |           |
|----|-----------|----------|-----------|----|-----------|----------|-----------|
| C  | 30.116583 | 4.406458 | 32.501598 | O  | 48.480874 | 5.891926 | 39.678834 |
| C  | 31.165132 | 5.065464 | 33.150901 | O  | 48.100804 | 3.708944 | 40.101328 |
| O  | 28.987841 | 4.033954 | 33.219927 | C  | 48.283315 | 4.685183 | 39.288506 |
| O  | 32.803051 | 6.525249 | 43.469331 | C  | 44.216817 | 5.879723 | 41.484693 |
| O  | 32.389878 | 4.369873 | 43.962610 | C  | 43.646870 | 6.946078 | 42.203276 |
| C  | 32.512469 | 5.591139 | 44.274272 | C  | 43.921087 | 4.040528 | 39.860622 |
| Cu | 48.452802 | 6.408848 | 41.597722 | O  | 46.478967 | 6.626848 | 41.489484 |
| Cu | 48.003828 | 3.982040 | 42.069963 | O  | 46.077393 | 4.443386 | 41.890007 |
| C  | 52.242277 | 4.464616 | 41.931345 | C  | 45.677280 | 5.634315 | 41.625631 |
| C  | 52.828352 | 3.947593 | 43.079296 | C  | 47.881576 | 6.050131 | 45.807288 |
| C  | 54.201352 | 3.732573 | 43.123194 | C  | 48.840750 | 6.852421 | 46.452355 |
| C  | 54.987277 | 4.036578 | 42.018142 | C  | 50.056504 | 7.183929 | 32.166688 |
| C  | 54.401202 | 4.554601 | 40.869191 | C  | 48.998348 | 6.696632 | 32.926138 |
| C  | 53.028202 | 4.768621 | 40.826292 | C  | 48.010335 | 5.872562 | 32.353886 |
| C  | 52.442128 | 5.287645 | 39.677341 | C  | 46.745332 | 5.598122 | 46.534525 |
| C  | 53.229054 | 5.591649 | 38.571289 | C  | 45.701159 | 4.882103 | 45.911373 |
| C  | 54.601054 | 5.377629 | 38.616189 | C  | 44.609616 | 4.439238 | 46.651877 |
| C  | 55.187129 | 4.858606 | 39.764139 | C  | 45.932336 | 4.612924 | 32.521405 |
| O  | 55.314970 | 5.617636 | 37.405141 | C  | 46.923075 | 5.397066 | 33.128096 |
| O  | 50.377127 | 5.936696 | 41.734519 | O  | 44.859496 | 4.155849 | 33.278468 |
| O  | 49.976920 | 3.761805 | 42.187400 | O  | 48.359454 | 6.684708 | 43.562967 |
| C  | 50.778051 | 4.737848 | 41.961287 | O  | 47.927750 | 4.510460 | 43.984606 |
| C  | 48.271790 | 4.403932 | 37.827896 | C  | 48.074083 | 5.727346 | 44.367663 |
| C  | 49.057020 | 3.341912 | 37.344714 | C  | 9.830844  | 7.260885 | 57.522289 |
| C  | 49.121828 | 3.063584 | 35.986641 | C  | 8.959813  | 6.502896 | 56.749314 |
| C  | 48.398641 | 3.836571 | 35.085697 | C  | 9.429780  | 5.394897 | 56.054290 |
| C  | 47.576686 | 4.895326 | 35.524782 | C  | 10.771780 | 5.042887 | 56.134240 |
| C  | 47.500094 | 5.175243 | 36.916020 | C  | 10.370715 | 3.178901 | 54.666241 |
| C  | 46.629741 | 6.190387 | 37.360262 | C  | 9.028715  | 3.528910 | 54.587291 |
| C  | 45.891836 | 6.932252 | 36.446382 | C  | 8.558747  | 4.637908 | 55.281315 |
| C  | 45.981460 | 6.691596 | 35.085177 | O  | 8.125681  | 2.792922 | 53.781316 |
| C  | 46.828815 | 5.670211 | 34.599183 | Cu | 15.894195 | 6.139667 | 57.135736 |
| O  | 45.227370 | 7.513040 | 34.249751 | Cu | 15.342794 | 3.725445 | 57.551919 |

|   |           |          |           |    |           |          |           |
|---|-----------|----------|-----------|----|-----------|----------|-----------|
| C | 19.596827 | 4.044505 | 57.441254 | C  | 26.382816 | 4.877408 | 56.165844 |
| C | 20.149191 | 3.280487 | 58.484930 | C  | 11.243748 | 3.934890 | 55.440215 |
| C | 21.502007 | 2.965134 | 58.498883 | C  | 26.056092 | 3.029651 | 54.625131 |
| C | 22.326069 | 3.398576 | 57.465750 | C  | 24.689135 | 3.251529 | 54.601884 |
| C | 21.810968 | 4.142143 | 56.386456 | C  | 24.129384 | 4.311657 | 55.350323 |
| C | 20.426159 | 4.456608 | 56.361076 | O  | 23.922064 | 2.373597 | 53.838897 |
| C | 19.902333 | 5.140274 | 55.243183 | O  | 13.939137 | 6.432357 | 56.972663 |
| C | 20.737439 | 5.535446 | 54.202940 | O  | 13.435937 | 4.270647 | 57.369273 |
| C | 22.103099 | 5.266571 | 54.245323 | C  | 13.092069 | 5.475327 | 57.084616 |
| C | 22.651524 | 4.561643 | 55.325530 | C  | 15.283042 | 5.695809 | 61.352094 |
| O | 22.925959 | 5.668584 | 53.199232 | C  | 16.314083 | 6.385792 | 61.978046 |
| O | 17.796261 | 5.597730 | 57.303283 | C  | 17.632726 | 6.930638 | 47.665293 |
| O | 17.306382 | 3.425918 | 57.672153 | C  | 16.552823 | 6.499111 | 48.426865 |
| C | 18.147705 | 4.376739 | 57.484819 | C  | 15.511341 | 5.745926 | 47.852139 |
| C | 15.681978 | 4.217535 | 53.324172 | C  | 14.198077 | 5.242813 | 62.095147 |
| C | 16.403637 | 3.114801 | 52.832784 | C  | 13.166036 | 4.552830 | 61.469195 |
| C | 16.458293 | 2.847180 | 51.472152 | C  | 12.083071 | 4.099834 | 62.213248 |
| C | 15.786550 | 3.671027 | 50.576553 | C  | 13.362436 | 4.612832 | 48.023867 |
| C | 15.029279 | 4.773771 | 51.023313 | C  | 14.403397 | 5.328772 | 48.630310 |
| C | 14.964730 | 5.044958 | 52.417056 | O  | 12.270507 | 4.211493 | 48.785543 |
| C | 14.156746 | 6.107651 | 52.868014 | O  | 15.757929 | 6.379589 | 59.109089 |
| C | 13.472055 | 6.904036 | 51.958687 | O  | 15.278899 | 4.206947 | 59.477460 |
| C | 13.551648 | 6.670625 | 50.595723 | C  | 15.446193 | 5.410570 | 59.892377 |
| C | 14.331884 | 5.600236 | 50.103020 | Cu | 31.470523 | 6.134076 | 57.133552 |
| O | 12.852900 | 7.544881 | 49.765777 | Cu | 30.963382 | 3.711297 | 57.559656 |
| O | 15.949802 | 5.657762 | 55.207634 | C  | 35.208503 | 4.076720 | 57.448533 |
| O | 15.441122 | 3.491734 | 55.579726 | C  | 35.751138 | 3.341356 | 58.518121 |
| C | 15.690208 | 4.471745 | 54.789839 | C  | 37.098802 | 3.007278 | 58.544240 |
| C | 11.644813 | 5.800876 | 56.909215 | C  | 37.928419 | 3.391774 | 57.497091 |
| C | 11.172845 | 6.908875 | 57.603239 | C  | 37.425189 | 4.109214 | 56.394836 |
| C | 25.311777 | 7.070918 | 57.577910 | C  | 36.045048 | 4.445843 | 56.358925 |
| C | 24.476929 | 6.245059 | 56.834511 | C  | 35.532904 | 5.105764 | 55.222415 |
| C | 24.987614 | 5.143572 | 56.116907 | C  | 36.374978 | 5.453689 | 54.170538 |

|   |           |          |           |    |           |          |           |
|---|-----------|----------|-----------|----|-----------|----------|-----------|
| C | 37.736506 | 5.163354 | 54.221798 | C  | 28.677575 | 5.422830 | 57.130434 |
| C | 38.274063 | 4.482602 | 55.323151 | C  | 30.903116 | 5.695628 | 61.351271 |
| O | 38.566312 | 5.522123 | 53.165651 | C  | 31.934171 | 6.385605 | 61.977208 |
| O | 33.388265 | 5.613254 | 57.267999 | C  | 33.081915 | 7.190622 | 47.653545 |
| O | 32.927580 | 3.441664 | 57.673859 | C  | 32.062925 | 6.669233 | 48.421150 |
| C | 33.756172 | 4.399407 | 57.471525 | C  | 31.084911 | 5.778967 | 47.869398 |
| C | 31.281602 | 4.195101 | 53.327994 | C  | 29.818163 | 5.242633 | 62.094342 |
| C | 32.064997 | 3.132170 | 52.843739 | C  | 28.786109 | 4.552656 | 61.468406 |
| C | 32.147792 | 2.868907 | 51.483558 | C  | 27.703155 | 4.099663 | 62.212477 |
| C | 31.442207 | 3.656168 | 50.581191 | C  | 29.055299 | 4.421319 | 48.034951 |
| C | 30.621333 | 4.714107 | 51.020703 | C  | 29.997899 | 5.247532 | 48.643956 |
| C | 30.530774 | 4.983390 | 52.413229 | O  | 28.020176 | 3.915073 | 48.760675 |
| C | 29.668504 | 6.006578 | 52.854362 | O  | 31.367640 | 6.374949 | 59.106978 |
| C | 28.953063 | 6.764936 | 51.934420 | O  | 30.903106 | 4.200220 | 59.483310 |
| C | 29.056181 | 6.531523 | 50.572934 | C  | 31.065444 | 5.406276 | 59.893587 |
| C | 29.888345 | 5.498884 | 50.097742 | Cu | 47.053125 | 6.252977 | 57.152937 |
| O | 28.327358 | 7.366052 | 49.730080 | Cu | 46.687597 | 3.796411 | 57.533600 |
| O | 31.498437 | 5.652478 | 55.203712 | C  | 50.914826 | 4.464382 | 57.493755 |
| O | 31.057806 | 3.473394 | 55.586977 | C  | 51.500920 | 3.947352 | 58.641694 |
| C | 31.275299 | 4.457021 | 54.792234 | C  | 52.873920 | 3.732327 | 58.685568 |
| C | 27.223634 | 5.697945 | 56.967477 | C  | 53.659827 | 4.036331 | 57.580503 |
| C | 26.671616 | 6.801410 | 57.643237 | C  | 53.073733 | 4.554362 | 56.431564 |
| C | 40.915375 | 6.954159 | 57.632597 | C  | 51.700733 | 4.768387 | 56.388690 |
| C | 40.088548 | 6.137053 | 56.873106 | C  | 51.114640 | 5.287417 | 55.239751 |
| C | 40.606143 | 5.046021 | 56.144273 | C  | 51.901547 | 5.591423 | 54.133687 |
| C | 42.003393 | 4.784544 | 56.193822 | C  | 53.273547 | 5.377397 | 54.178561 |
| C | 26.903096 | 3.825021 | 55.386551 | C  | 53.859639 | 4.858367 | 55.326499 |
| C | 41.684013 | 2.944317 | 54.643728 | O  | 53.987443 | 5.617405 | 52.967501 |
| C | 40.316694 | 3.166485 | 54.613211 | O  | 48.993015 | 5.860386 | 57.303286 |
| C | 39.751801 | 4.222499 | 55.363944 | O  | 48.672889 | 3.655887 | 57.668518 |
| O | 39.554205 | 2.290382 | 53.843678 | C  | 49.438495 | 4.672984 | 57.498499 |
| O | 29.502237 | 6.399501 | 57.014889 | C  | 46.961066 | 4.371510 | 53.318746 |
| O | 29.050233 | 4.221525 | 57.387717 | C  | 47.779587 | 3.351362 | 52.801967 |

|   |           |          |           |   |           |          |           |
|---|-----------|----------|-----------|---|-----------|----------|-----------|
| C | 47.830721 | 3.101241 | 51.438304 | C | 15.179191 | 6.168782 | 64.090104 |
| C | 47.062227 | 3.862606 | 50.565752 | C | 14.147152 | 5.478800 | 63.465152 |
| C | 46.212566 | 4.884839 | 51.039019 | C | 12.031146 | 4.336820 | 63.582253 |
| C | 46.146974 | 5.132088 | 52.436368 | C | 13.063187 | 5.025805 | 64.207205 |
| C | 45.245423 | 6.102993 | 52.915929 | O | 10.943183 | 3.908824 | 64.361306 |
| C | 44.469640 | 6.839005 | 52.029557 | C | 31.882271 | 6.620587 | 63.346214 |
| C | 44.551623 | 6.635778 | 50.661962 | C | 30.799317 | 6.168593 | 64.089284 |
| C | 45.427832 | 5.656157 | 50.141148 | C | 29.767262 | 5.478616 | 63.464348 |
| O | 43.766264 | 7.457613 | 49.856395 | C | 27.651255 | 4.336645 | 63.581483 |
| O | 47.124679 | 5.805530 | 55.217523 | C | 28.683309 | 5.025622 | 64.206418 |
| O | 46.812852 | 3.597672 | 55.562265 | O | 26.563304 | 3.908650 | 64.360554 |
| C | 46.966398 | 4.606675 | 54.785702 | C | 47.502385 | 6.620342 | 63.345096 |
| C | 42.839754 | 5.608396 | 56.996712 | C | 46.419443 | 6.168348 | 64.088184 |
| C | 42.276214 | 6.694713 | 57.691980 | C | 45.387375 | 5.478376 | 63.463264 |
| C | 42.528134 | 3.738065 | 55.410810 | C | 43.271365 | 4.336411 | 63.580432 |
| O | 45.079597 | 6.403253 | 57.024918 | C | 44.303433 | 5.025383 | 64.205353 |
| O | 44.742856 | 4.197281 | 57.351835 | O | 42.183428 | 3.908416 | 64.359522 |
| C | 44.306740 | 5.384563 | 57.124925 | H | 12.119249 | 8.127110 | 26.935697 |
| C | 46.523192 | 5.695393 | 61.350166 | H | 10.573027 | 6.786843 | 25.566341 |
| C | 47.554258 | 6.385364 | 61.976087 | H | 13.383828 | 2.323405 | 22.982345 |
| C | 48.718342 | 7.168316 | 47.798930 | H | 9.847429  | 3.169681 | 22.677028 |
| C | 47.633316 | 6.692570 | 48.525932 | H | 22.117313 | 2.848975 | 28.241056 |
| C | 46.636538 | 5.905747 | 47.916759 | H | 24.510857 | 2.284042 | 28.277764 |
| C | 45.438249 | 5.242399 | 62.093255 | H | 25.985870 | 3.025619 | 26.478323 |
| C | 44.406182 | 4.552428 | 61.467335 | H | 21.474332 | 5.216094 | 24.049419 |
| C | 43.323240 | 4.099435 | 62.211424 | H | 22.956095 | 5.895165 | 22.267159 |
| C | 44.528254 | 4.690385 | 48.019078 | H | 19.531962 | 2.329411 | 22.589921 |
| C | 45.528026 | 5.433131 | 48.662031 | H | 19.679243 | 1.794008 | 20.190524 |
| O | 43.436185 | 4.234099 | 48.748388 | H | 18.480413 | 3.170765 | 18.536729 |
| O | 46.922342 | 6.444427 | 59.125520 | H | 16.651533 | 6.145386 | 22.827122 |
| O | 46.574519 | 4.239786 | 59.461952 | H | 15.506916 | 7.500980 | 21.165258 |
| C | 46.675852 | 5.444252 | 59.891536 | H | 14.495560 | 7.508223 | 27.087552 |
| C | 16.262158 | 6.620778 | 63.347051 | H | 27.525527 | 7.858739 | 26.996333 |

|                                |                                |
|--------------------------------|--------------------------------|
| H 26.050295 6.394061 25.724532 | H 52.703477 5.451863 24.014117 |
| H 14.941512 3.634101 24.311138 | H 54.081098 5.975913 22.116776 |
| H 29.094671 2.066158 23.050741 | H 50.777474 2.335068 22.589495 |
| H 19.767099 6.920301 30.323372 | H 50.920917 1.795283 20.189768 |
| H 15.665667 4.544106 29.263743 | H 49.720394 3.170977 18.535924 |
| H 13.750678 3.850652 30.564015 | H 47.862836 6.134644 22.823781 |
| H 15.671829 6.861075 17.596372 | H 46.741197 7.496784 21.164979 |
| H 25.077712 6.030217 21.427919 | H 45.545704 7.334614 27.190095 |
| H 25.573316 2.437101 22.850963 | H 46.233911 3.364887 24.477887 |
| H 37.677970 2.824985 28.305235 | H 50.994733 7.224702 30.246732 |
| H 40.065030 2.245821 28.394248 | H 47.068303 4.516174 29.337468 |
| H 41.573669 2.935635 26.603097 | H 45.226803 3.732217 30.691029 |
| H 37.130198 5.177892 24.094002 | H 46.913126 6.861861 17.595763 |
| H 38.648568 5.807519 22.320001 | H 56.056121 5.977195 21.104215 |
| H 35.146699 2.325378 22.590031 | H 10.790923 8.127987 42.498555 |
| H 35.297783 1.792984 20.190399 | H 9.244428 6.787037 41.130031  |
| H 34.099808 3.170476 18.536511 | H 12.055494 2.324862 38.544365 |
| H 32.268508 6.145143 22.826197 | H 8.519393 3.171273 38.239604  |
| H 31.125709 7.500154 21.165125 | H 20.804194 2.926689 43.689763 |
| H 29.931862 7.383385 27.142309 | H 23.194333 2.359279 43.770611 |
| H 43.129422 7.753993 27.086963 | H 24.705490 3.105450 42.005918 |
| H 41.667222 6.258386 25.841584 | H 20.255057 5.361722 39.520946 |
| H 30.593082 3.487381 24.320499 | H 21.778094 6.047709 37.774955 |
| H 44.741604 1.910758 23.233160 | H 18.144867 2.381852 37.886436 |
| H 35.440694 6.623385 30.415967 | H 18.158494 1.915775 35.472903 |
| H 31.297294 4.329481 29.332784 | H 16.934558 3.350748 33.929815 |
| H 29.367410 3.666622 30.626854 | H 15.203600 6.208296 38.390298 |
| H 31.292062 6.861069 17.596316 | H 13.974952 7.595646 36.824759 |
| H 40.781741 5.885343 21.503110 | H 13.169134 7.511246 42.645856 |
| H 41.219629 2.273444 23.009248 | H 26.227259 7.787695 42.887298 |
| H 53.552025 3.700118 28.381287 | H 24.764273 6.434486 41.484121 |
| H 55.987722 3.326138 28.455745 | H 13.611983 3.633919 39.867874 |
| H 57.384075 3.866339 26.497854 | H 27.884464 2.197932 38.611647 |

|   |           |          |           |   |           |          |           |
|---|-----------|----------|-----------|---|-----------|----------|-----------|
| H | 18.554556 | 6.945085 | 45.738529 | H | 52.224126 | 3.710619 | 43.948114 |
| H | 19.564278 | 7.482146 | 32.708402 | H | 54.659367 | 3.328318 | 44.019965 |
| H | 17.632574 | 6.730187 | 33.996873 | H | 56.055413 | 3.866666 | 42.061236 |
| H | 14.456329 | 4.499183 | 44.825647 | H | 51.374553 | 5.453017 | 39.579835 |
| H | 12.587493 | 3.802517 | 46.189104 | H | 52.752229 | 5.975824 | 37.680139 |
| H | 12.716756 | 3.692007 | 32.597015 | H | 49.632293 | 2.734034 | 38.033774 |
| H | 13.979125 | 7.226246 | 33.297904 | H | 49.737878 | 2.244703 | 35.628647 |
| H | 23.919664 | 6.183633 | 36.983385 | H | 48.473869 | 3.587382 | 34.036809 |
| H | 24.495454 | 2.640124 | 38.171606 | H | 46.494158 | 6.418752 | 38.411358 |
| H | 36.351554 | 2.708080 | 43.468100 | H | 45.228677 | 7.712381 | 36.795663 |
| H | 38.791993 | 2.139576 | 43.535724 | H | 44.272616 | 7.583321 | 42.817949 |
| H | 40.331477 | 3.063271 | 41.872785 | H | 44.985085 | 3.833657 | 39.815738 |
| H | 35.876892 | 5.638228 | 39.668281 | H | 49.693927 | 7.228411 | 45.899282 |
| H | 37.393462 | 6.490067 | 37.938046 | H | 50.801085 | 7.828825 | 32.622926 |
| H | 33.466246 | 2.094385 | 38.175452 | H | 48.948263 | 6.981543 | 33.968482 |
| H | 33.536954 | 1.534278 | 35.730407 | H | 45.703333 | 4.665290 | 44.848714 |
| H | 32.475836 | 2.993631 | 34.089528 | H | 43.823188 | 3.889743 | 46.152392 |
| H | 30.852376 | 6.131135 | 38.430332 | H | 44.230473 | 3.576284 | 32.743115 |
| H | 29.670278 | 7.547625 | 36.783793 | H | 45.321868 | 7.277700 | 33.276513 |
| H | 28.682104 | 7.344159 | 42.977413 | H | 54.726407 | 5.972586 | 36.666003 |
| H | 41.855096 | 8.009829 | 42.724789 | H | 9.463379  | 8.127040 | 58.062936 |
| H | 40.400736 | 6.600772 | 41.369920 | H | 7.916936  | 6.786690 | 56.693555 |
| H | 29.348859 | 3.535715 | 40.079372 | H | 10.728243 | 2.325390 | 54.106750 |
| H | 43.498851 | 2.461856 | 38.471497 | H | 7.191665  | 3.170566 | 53.803558 |
| H | 34.005887 | 7.265167 | 45.680318 | H | 19.519536 | 2.937647 | 59.297988 |
| H | 35.273225 | 7.115003 | 32.819368 | H | 21.915864 | 2.382347 | 59.315863 |
| H | 33.324193 | 6.393732 | 34.098668 | H | 23.374411 | 3.135470 | 57.508561 |
| H | 30.285196 | 4.299542 | 44.854220 | H | 18.846162 | 5.368827 | 55.149052 |
| H | 28.411821 | 3.465910 | 46.188114 | H | 20.312517 | 6.060367 | 53.358047 |
| H | 28.329195 | 3.512225 | 32.660113 | H | 16.934926 | 2.464000 | 53.517907 |
| H | 29.665357 | 7.111821 | 33.364837 | H | 17.025085 | 1.995952 | 51.108114 |
| H | 39.482502 | 6.620780 | 37.204712 | H | 15.850920 | 3.427993 | 49.525467 |
| H | 39.965465 | 2.807840 | 38.296321 | H | 14.030050 | 6.333510 | 53.920683 |

|   |           |          |           |   |           |          |           |
|---|-----------|----------|-----------|---|-----------|----------|-----------|
| H | 12.859723 | 7.722472 | 52.312882 | H | 28.748776 | 4.375566 | 60.399813 |
| H | 11.840564 | 7.509221 | 58.212300 | H | 26.897681 | 3.574646 | 61.718370 |
| H | 24.900166 | 7.922191 | 58.111000 | H | 27.469953 | 3.349709 | 48.194464 |
| H | 23.423827 | 6.486632 | 56.809872 | H | 28.451909 | 7.153202 | 48.751785 |
| H | 12.285074 | 3.636251 | 55.427022 | H | 38.076566 | 6.036526 | 52.448840 |
| H | 26.463471 | 2.220690 | 54.033575 | H | 38.573828 | 2.514279 | 53.847780 |
| H | 17.168290 | 6.739449 | 61.410650 | H | 50.894945 | 3.700187 | 59.506387 |
| H | 18.420522 | 7.520436 | 48.123721 | H | 53.331567 | 3.325552 | 59.581318 |
| H | 16.530185 | 6.770922 | 49.473572 | H | 54.727847 | 3.865740 | 57.623139 |
| H | 13.128965 | 4.375952 | 60.400578 | H | 50.047610 | 5.459474 | 55.145472 |
| H | 11.277844 | 3.574443 | 61.719246 | H | 51.424864 | 5.977040 | 53.243048 |
| H | 11.603196 | 3.678723 | 48.248171 | H | 48.385861 | 2.750106 | 53.469925 |
| H | 12.944987 | 7.319635 | 48.789854 | H | 48.469090 | 2.311878 | 51.054121 |
| H | 22.426715 | 6.194865 | 52.497826 | H | 47.125027 | 3.632553 | 49.511876 |
| H | 22.941449 | 2.596489 | 53.849242 | H | 45.115069 | 6.301482 | 53.973741 |
| H | 35.115583 | 3.029367 | 59.339023 | H | 43.783779 | 7.586340 | 52.405735 |
| H | 37.503274 | 2.444216 | 59.379504 | H | 42.906464 | 7.343322 | 58.289834 |
| H | 38.971788 | 3.111225 | 57.547748 | H | 43.589708 | 3.524019 | 55.365214 |
| H | 34.481022 | 5.352924 | 55.124629 | H | 48.405730 | 6.744627 | 61.407997 |
| H | 35.959449 | 5.960262 | 53.309921 | H | 49.469360 | 7.784311 | 48.283621 |
| H | 32.625534 | 2.511685 | 53.533786 | H | 47.569738 | 6.957609 | 49.572646 |
| H | 32.764017 | 2.050326 | 51.124692 | H | 44.381523 | 4.364263 | 60.399397 |
| H | 31.532002 | 3.418404 | 49.529519 | H | 42.519344 | 3.571637 | 61.717687 |
| H | 29.525258 | 6.229838 | 53.906363 | H | 42.802976 | 3.682536 | 48.188789 |
| H | 28.297960 | 7.553761 | 52.280495 | H | 43.851526 | 7.246813 | 48.876964 |
| H | 27.306981 | 7.448088 | 58.237609 | H | 53.398572 | 5.970702 | 52.227733 |
| H | 40.497937 | 7.795224 | 58.177203 | H | 17.068253 | 7.158002 | 63.836008 |
| H | 39.035423 | 6.377210 | 56.847213 | H | 15.148100 | 6.357237 | 65.155560 |
| H | 27.964185 | 3.608717 | 55.338301 | H | 10.263232 | 3.421745 | 63.796998 |
| H | 42.094416 | 2.138339 | 54.050221 | H | 32.688294 | 7.157884 | 63.835136 |
| H | 32.788256 | 6.738986 | 61.409544 | H | 30.768036 | 6.357127 | 65.154697 |
| H | 33.806817 | 7.875860 | 48.104194 | H | 25.881838 | 3.424339 | 63.795579 |
| H | 32.000971 | 6.957390 | 49.475291 | H | 48.307515 | 7.159109 | 63.833765 |



|   |           |           |           |                                    |           |           |           |
|---|-----------|-----------|-----------|------------------------------------|-----------|-----------|-----------|
| H | 46.387749 | 6.357299  | 65.153495 | H                                  | 35.702748 | 8.997073  | 37.331856 |
| H | 41.501143 | 3.425394  | 63.794316 | H                                  | 35.697277 | 8.189832  | 38.913015 |
| H | 54.922550 | 4.682775  | 55.325798 | H                                  | 33.260130 | 9.177797  | 37.298978 |
| H | 56.250091 | 4.683154  | 39.763725 | H                                  | 33.645976 | 7.500401  | 37.732067 |
| H | 57.578896 | 4.683428  | 24.200651 | H                                  | 35.319047 | 9.814216  | 41.139259 |
| H | 32.654286 | 5.043320  | 18.026523 | H                                  | 28.565695 | 11.632213 | 42.191871 |
| H | 17.034805 | 5.043573  | 18.026679 | H                                  | 28.607408 | 12.763213 | 44.397547 |
| H | 10.176551 | 4.915329  | 24.089633 | H                                  | 30.041692 | 11.878404 | 46.250959 |
| H | 8.847994  | 4.915610  | 39.653324 | H                                  | 31.428652 | 9.829965  | 45.845635 |
| H | 7.520561  | 4.915564  | 55.216460 | H                                  | 31.397547 | 8.702313  | 43.646433 |
| H | 12.998962 | 5.198994  | 65.269022 | H                                  | 30.247820 | 8.479933  | 41.493895 |
| H | 28.618775 | 5.198984  | 65.268149 | H                                  | 29.191039 | 9.667760  | 40.913419 |
| H | 44.238625 | 5.198845  | 65.267032 |                                    |           |           |           |
| H | 48.274018 | 5.043179  | 18.026059 |                                    |           |           |           |
| C | 32.880132 | 8.692929  | 39.332430 | ( <i>R,R</i> )-2-TS1(QM(B3LYP)/MM) |           |           |           |
| C | 33.313582 | 9.549169  | 40.457539 | C                                  | 12.487000 | 7.261000  | 26.395000 |
| C | 34.636928 | 10.295680 | 40.413614 | C                                  | 11.616000 | 6.503000  | 25.622000 |
| C | 35.276631 | 10.317385 | 39.012031 | C                                  | 12.086000 | 5.395000  | 24.927000 |
| C | 35.182778 | 8.957298  | 38.306347 | C                                  | 13.428000 | 5.043000  | 25.007000 |
| C | 33.718924 | 8.544816  | 38.083914 | C                                  | 13.027000 | 3.179000  | 23.539000 |
| O | 33.422407 | 8.108168  | 40.527177 | C                                  | 11.685000 | 3.529000  | 23.460000 |
| C | 29.977728 | 10.085552 | 42.756910 | C                                  | 11.215000 | 4.638000  | 24.154000 |
| C | 29.197830 | 11.236665 | 42.995015 | O                                  | 10.782000 | 2.793000  | 22.654000 |
| C | 29.225266 | 11.872435 | 44.238711 | Cu                                 | 18.544517 | 6.097334  | 26.016163 |
| C | 30.025199 | 11.380907 | 45.276501 | Cu                                 | 17.961592 | 3.708242  | 26.531724 |
| C | 30.800289 | 10.237463 | 45.046454 | C                                  | 22.230803 | 3.984814  | 26.388071 |
| C | 30.783381 | 9.594111  | 43.807250 | C                                  | 22.769987 | 3.204941  | 27.427672 |
| N | 29.994606 | 9.470727  | 41.504572 | C                                  | 24.127298 | 2.909209  | 27.467792 |
| H | 34.476400 | 11.327497 | 40.773852 | C                                  | 24.970578 | 3.378901  | 26.466407 |
| H | 32.527763 | 9.944314  | 41.113138 | C                                  | 24.470379 | 4.133595  | 25.388726 |
| H | 31.802447 | 8.517993  | 39.215150 | C                                  | 23.081060 | 4.425903  | 25.333897 |
| H | 36.330298 | 10.639619 | 39.092026 | C                                  | 22.574743 | 5.116568  | 24.211808 |
| H | 34.763585 | 11.076699 | 38.389083 | C                                  | 23.429862 | 5.546793  | 23.202427 |
|   |           |           |           | C                                  | 24.798037 | 5.299846  | 23.275088 |

|   |           |          |           |    |           |          |           |
|---|-----------|----------|-----------|----|-----------|----------|-----------|
| C | 25.329763 | 4.582723 | 24.355414 | C  | 17.919029 | 5.830915 | 30.234792 |
| O | 25.639691 | 5.733675 | 22.256718 | C  | 18.916401 | 6.579139 | 30.886723 |
| O | 20.438277 | 5.540927 | 26.192978 | C  | 16.763473 | 5.425707 | 30.959964 |
| O | 19.928513 | 3.392537 | 26.654213 | C  | 15.685315 | 4.768498 | 30.329871 |
| C | 20.780091 | 4.325707 | 26.421354 | C  | 14.571994 | 4.374822 | 31.065845 |
| C | 18.226927 | 4.022014 | 22.293999 | O  | 18.433073 | 6.418231 | 27.978657 |
| C | 18.992915 | 2.941012 | 21.873981 | O  | 17.908022 | 4.271661 | 28.433688 |
| C | 19.081890 | 2.638017 | 20.519979 | C  | 18.104200 | 5.486486 | 28.798204 |
| C | 18.404876 | 3.417023 | 19.587993 | Cu | 34.189095 | 6.116780 | 26.012130 |
| C | 17.639888 | 4.497024 | 20.008011 | Cu | 33.608804 | 3.736792 | 26.567718 |
| C | 17.550913 | 4.800019 | 21.362013 | C  | 37.866049 | 3.959642 | 26.374845 |
| C | 16.783924 | 5.881020 | 21.784030 | C  | 38.393539 | 3.244342 | 27.466077 |
| C | 16.107910 | 6.659026 | 20.850045 | C  | 39.737688 | 2.897082 | 27.509931 |
| C | 16.197885 | 6.355031 | 19.497042 | C  | 40.578937 | 3.248893 | 26.460796 |
| C | 16.963875 | 5.274030 | 19.076025 | C  | 40.090269 | 3.941563 | 25.336748 |
| O | 15.523872 | 7.185037 | 18.539057 | C  | 38.713272 | 4.287207 | 25.280096 |
| O | 18.566870 | 5.535298 | 24.110940 | C  | 38.215290 | 4.918539 | 24.121241 |
| O | 18.033466 | 3.393208 | 24.577329 | C  | 39.068795 | 5.231859 | 23.067794 |
| C | 18.269969 | 4.340313 | 23.746242 | C  | 40.428444 | 4.937309 | 23.140491 |
| C | 14.301000 | 5.801000 | 25.782000 | C  | 40.951906 | 4.285377 | 24.265830 |
| C | 13.829000 | 6.909000 | 26.476000 | O  | 41.270417 | 5.267665 | 22.084387 |
| C | 28.015672 | 7.188499 | 26.472832 | O  | 36.089774 | 5.538157 | 26.130017 |
| C | 27.170262 | 6.326305 | 25.782861 | O  | 35.566966 | 3.407826 | 26.658090 |
| C | 27.671911 | 5.192346 | 25.112174 | C  | 36.422866 | 4.325783 | 26.393155 |
| C | 29.067155 | 4.926042 | 25.160937 | C  | 33.846854 | 4.021972 | 22.293718 |
| C | 13.900000 | 3.935000 | 24.313000 | C  | 34.612831 | 2.940969 | 21.873683 |
| C | 28.721114 | 3.000188 | 23.721870 | C  | 34.701781 | 2.637978 | 20.519678 |
| C | 27.355317 | 3.225724 | 23.698736 | C  | 34.024753 | 3.416989 | 19.587708 |
| C | 26.805497 | 4.325924 | 24.394295 | C  | 33.259776 | 4.496991 | 20.007741 |
| O | 26.579519 | 2.315799 | 22.983640 | C  | 33.170826 | 4.799983 | 21.361747 |
| O | 16.595646 | 6.407825 | 25.850289 | C  | 32.403848 | 5.880986 | 21.783781 |
| O | 16.061929 | 4.267235 | 26.320395 | C  | 31.727821 | 6.658997 | 20.849810 |
| C | 15.737875 | 5.464106 | 25.984703 | C  | 31.817771 | 6.355005 | 19.496805 |

|    |           |          |           |   |           |          |           |
|----|-----------|----------|-----------|---|-----------|----------|-----------|
| C  | 32.583748 | 5.274002 | 19.075771 | C | 55.729946 | 4.554780 | 25.305823 |
| O  | 31.143743 | 7.185016 | 18.538835 | C | 54.356947 | 4.768795 | 25.262899 |
| O  | 34.158390 | 5.546329 | 24.109508 | C | 53.770890 | 5.287813 | 24.113936 |
| O  | 33.648402 | 3.405474 | 24.599207 | C | 54.557834 | 5.591815 | 23.007897 |
| C  | 33.878283 | 4.345288 | 23.753824 | C | 55.929834 | 5.377800 | 23.052821 |
| C  | 29.919440 | 5.783143 | 25.912749 | C | 56.515889 | 4.858782 | 24.200784 |
| C  | 29.377454 | 6.922111 | 26.535533 | O | 56.643771 | 5.617805 | 21.841785 |
| C  | 43.534679 | 6.873338 | 26.511256 | O | 51.636701 | 5.836697 | 26.126453 |
| C  | 42.725992 | 6.016130 | 25.776099 | O | 51.336494 | 3.658399 | 26.634436 |
| C  | 43.263830 | 4.900409 | 25.101325 | C | 52.093310 | 4.665684 | 26.381482 |
| C  | 44.661490 | 4.652957 | 25.185115 | C | 49.466779 | 4.021876 | 22.293156 |
| C  | 29.576974 | 3.832338 | 24.432298 | C | 50.232745 | 2.940872 | 21.873104 |
| C  | 44.381689 | 2.740534 | 23.715906 | C | 50.321669 | 2.637885 | 20.519096 |
| C  | 43.014417 | 2.954531 | 23.647579 | C | 49.644627 | 3.416901 | 19.587140 |
| C  | 42.429897 | 4.038676 | 24.340413 | C | 48.879661 | 4.496905 | 20.007192 |
| O  | 42.271742 | 2.043680 | 22.899692 | C | 48.790737 | 4.799893 | 21.361200 |
| O  | 32.220528 | 6.439773 | 25.923755 | C | 48.023772 | 5.880897 | 21.783251 |
| O  | 31.712979 | 4.296810 | 26.407788 | C | 47.347731 | 6.658913 | 20.849295 |
| C  | 31.370099 | 5.491713 | 26.091124 | C | 47.437655 | 6.354926 | 19.496287 |
| C  | 33.772826 | 5.904799 | 30.252006 | C | 48.203620 | 5.273922 | 19.075235 |
| C  | 34.894507 | 6.495030 | 30.862122 | O | 46.763613 | 7.184943 | 18.538331 |
| C  | 32.582950 | 5.719664 | 31.006987 | O | 49.729701 | 5.591256 | 24.092321 |
| C  | 31.411792 | 5.196259 | 30.422179 | O | 49.387104 | 3.424553 | 24.607636 |
| C  | 30.251627 | 5.055237 | 31.178975 | C | 49.525506 | 4.368645 | 23.750230 |
| O  | 34.159574 | 6.452883 | 27.970782 | C | 45.480001 | 5.522911 | 25.957451 |
| O  | 33.602535 | 4.323824 | 28.472032 | C | 44.898223 | 6.633285 | 26.596870 |
| C  | 33.855824 | 5.535677 | 28.814033 | C | 45.206219 | 3.571894 | 24.464701 |
| Cu | 49.694040 | 6.203203 | 25.988476 | O | 47.714430 | 6.334273 | 25.890161 |
| Cu | 49.346365 | 3.783809 | 26.563479 | O | 47.395618 | 4.164953 | 26.418512 |
| C  | 53.571003 | 4.464792 | 26.367939 | C | 46.949363 | 5.325194 | 26.094106 |
| C  | 54.157058 | 3.947774 | 27.515902 | C | 49.189083 | 5.974486 | 30.223847 |
| C  | 55.530059 | 3.732759 | 27.559826 | C | 50.119391 | 6.828670 | 30.843752 |
| C  | 56.316002 | 4.036762 | 26.454787 | C | 48.084312 | 5.482249 | 30.974308 |

|    |           |          |           |   |           |          |           |
|----|-----------|----------|-----------|---|-----------|----------|-----------|
| C  | 47.067340 | 4.707771 | 30.376007 | C | 16.122468 | 4.628398 | 35.460526 |
| C  | 46.003987 | 4.230914 | 31.135989 | C | 16.095090 | 4.876588 | 36.859033 |
| O  | 49.603795 | 6.558498 | 27.946221 | C | 15.338312 | 5.962186 | 37.343826 |
| O  | 49.299255 | 4.381841 | 28.455767 | C | 14.666414 | 6.799838 | 36.462129 |
| C  | 49.383866 | 5.617681 | 28.791471 | C | 14.718231 | 6.592804 | 35.093671 |
| C  | 11.158286 | 7.260970 | 41.959133 | C | 15.453952 | 5.507120 | 34.567634 |
| C  | 10.287269 | 6.502976 | 41.186145 | O | 14.043999 | 7.511428 | 34.292270 |
| C  | 10.757253 | 5.394976 | 40.491133 | O | 17.219595 | 5.455111 | 39.585549 |
| C  | 12.099253 | 5.042971 | 40.571108 | O | 16.628378 | 3.321691 | 40.017725 |
| C  | 11.698221 | 3.178978 | 39.103109 | C | 16.889989 | 4.276122 | 39.200019 |
| C  | 10.356221 | 3.528983 | 39.024134 | C | 12.972270 | 5.800966 | 41.346096 |
| C  | 9.886237  | 4.637982 | 39.718146 | C | 12.500286 | 6.908965 | 42.040108 |
| O  | 9.453204  | 2.792989 | 38.218147 | C | 26.299068 | 6.338941 | 43.116953 |
| Cu | 17.246780 | 5.980673 | 41.499841 | C | 25.599827 | 5.707181 | 42.111341 |
| Cu | 16.595546 | 3.605711 | 41.990128 | C | 26.242644 | 4.842462 | 41.165816 |
| C  | 20.864572 | 3.714381 | 41.824373 | C | 27.672810 | 4.679058 | 41.285592 |
| C  | 21.336980 | 2.850189 | 42.830157 | C | 12.571237 | 3.934972 | 39.877096 |
| C  | 22.675891 | 2.485059 | 42.888854 | C | 27.635108 | 3.180493 | 39.366488 |
| C  | 23.571337 | 2.979825 | 41.948122 | C | 26.227780 | 3.326642 | 39.245004 |
| C  | 23.143623 | 3.833549 | 40.914809 | C | 25.525513 | 4.148879 | 40.121791 |
| C  | 21.767095 | 4.175270 | 40.823980 | O | 25.698210 | 2.586575 | 38.226642 |
| C  | 21.327883 | 4.939236 | 39.722702 | O | 15.295279 | 6.364159 | 41.385190 |
| C  | 22.239122 | 5.401711 | 38.778550 | O | 14.714238 | 4.234485 | 41.842833 |
| C  | 23.598475 | 5.133170 | 38.909249 | C | 14.412457 | 5.443799 | 41.533003 |
| C  | 24.063221 | 4.350207 | 39.972267 | C | 16.715814 | 5.686430 | 45.725172 |
| O  | 24.495185 | 5.614393 | 37.963596 | C | 17.750395 | 6.413646 | 46.343097 |
| O  | 19.127948 | 5.346575 | 41.631094 | C | 18.814074 | 6.877657 | 32.239722 |
| O  | 18.544164 | 3.213213 | 42.071100 | C | 17.710860 | 6.441177 | 32.965003 |
| C  | 19.427729 | 4.116082 | 41.845380 | C | 16.673083 | 5.717651 | 32.346878 |
| C  | 16.802586 | 4.010478 | 37.738098 | C | 15.564080 | 5.331559 | 46.482516 |
| C  | 17.457059 | 2.879831 | 37.217002 | C | 14.457549 | 4.685692 | 45.891648 |
| C  | 17.467651 | 2.629877 | 35.851102 | C | 13.347649 | 4.345042 | 46.658536 |
| C  | 16.820758 | 3.500819 | 34.981350 | C | 14.502037 | 4.616832 | 32.435506 |

|    |           |          |           |    |           |          |           |
|----|-----------|----------|-----------|----|-----------|----------|-----------|
| C  | 15.541429 | 5.294668 | 33.086938 | O  | 32.224254 | 4.035428 | 40.129972 |
| O  | 13.384979 | 4.213803 | 33.158685 | C  | 32.468640 | 5.012080 | 39.365577 |
| O  | 17.188614 | 6.274776 | 43.465211 | C  | 28.382629 | 5.390930 | 42.311411 |
| O  | 16.601901 | 4.141562 | 43.905765 | C  | 27.696391 | 6.189928 | 43.213002 |
| C  | 16.848640 | 5.344765 | 44.281121 | C  | 42.179960 | 6.862149 | 42.049022 |
| Cu | 33.547236 | 6.699198 | 41.546132 | C  | 41.408298 | 6.040970 | 41.235525 |
| Cu | 32.417331 | 4.099226 | 42.090884 | C  | 41.993163 | 5.010483 | 40.472177 |
| C  | 36.561915 | 3.649007 | 41.446186 | C  | 43.395626 | 4.798755 | 40.560525 |
| C  | 37.004207 | 2.676232 | 42.324849 | C  | 28.335772 | 3.834384 | 40.346115 |
| C  | 38.357373 | 2.270356 | 42.311922 | C  | 43.194340 | 3.006855 | 38.933573 |
| C  | 39.249941 | 2.836986 | 41.427973 | C  | 41.824170 | 3.192996 | 38.852794 |
| C  | 38.836919 | 3.815873 | 40.465856 | C  | 41.205793 | 4.199057 | 39.619495 |
| C  | 37.449757 | 4.205470 | 40.462331 | O  | 41.116373 | 2.342697 | 38.007848 |
| C  | 37.009552 | 5.112098 | 39.455573 | O  | 30.471863 | 6.468751 | 42.637461 |
| C  | 37.882843 | 5.624187 | 38.526430 | O  | 30.483994 | 4.259332 | 42.289389 |
| C  | 39.263846 | 5.300357 | 38.567263 | C  | 29.890325 | 5.386810 | 42.420139 |
| C  | 39.745377 | 4.409859 | 39.524885 | C  | 32.730932 | 6.210145 | 45.731822 |
| O  | 40.117791 | 5.865505 | 37.669433 | C  | 33.571972 | 7.122534 | 46.346177 |
| O  | 35.001814 | 5.411630 | 41.484771 | C  | 34.867255 | 6.861860 | 32.201671 |
| O  | 34.247297 | 3.352336 | 41.922969 | C  | 33.712936 | 6.664817 | 32.951127 |
| C  | 35.163552 | 4.162052 | 41.620603 | C  | 32.557619 | 6.104578 | 32.374375 |
| C  | 32.358240 | 4.729882 | 37.891961 | C  | 31.641910 | 5.615552 | 46.464257 |
| C  | 32.772247 | 3.471297 | 37.482276 | C  | 30.706680 | 4.720051 | 45.867905 |
| C  | 32.768440 | 3.129709 | 36.115249 | C  | 29.655089 | 4.201011 | 46.583676 |
| C  | 32.320664 | 4.030300 | 35.173170 | C  | 30.229448 | 5.415556 | 32.524487 |
| C  | 31.841247 | 5.330159 | 35.537436 | C  | 31.375619 | 5.939569 | 33.130810 |
| C  | 31.871979 | 5.683015 | 36.935127 | O  | 29.060678 | 5.281115 | 33.262679 |
| C  | 31.369624 | 6.960650 | 37.315599 | O  | 33.417253 | 6.811598 | 43.543718 |
| C  | 30.867065 | 7.833662 | 36.384543 | O  | 32.778857 | 4.686461 | 43.926596 |
| C  | 30.845495 | 7.500828 | 35.004328 | C  | 32.992075 | 5.876504 | 44.287470 |
| C  | 31.333363 | 6.272326 | 34.572729 | Cu | 48.395095 | 6.294276 | 41.571282 |
| O  | 30.331587 | 8.491281 | 34.214801 | Cu | 48.017910 | 3.857612 | 42.053746 |
| O  | 32.831873 | 6.166263 | 39.747932 | C  | 52.242278 | 4.464620 | 41.931334 |

|   |           |          |           |    |           |          |           |
|---|-----------|----------|-----------|----|-----------|----------|-----------|
| C | 52.828353 | 3.947597 | 43.079285 | C  | 47.854775 | 5.942825 | 45.785108 |
| C | 54.201353 | 3.732577 | 43.123183 | C  | 48.811940 | 6.756472 | 46.419658 |
| C | 54.987278 | 4.036581 | 42.018131 | C  | 50.002632 | 7.153512 | 32.189629 |
| C | 54.401203 | 4.554604 | 40.869180 | C  | 48.950666 | 6.638397 | 32.939309 |
| C | 53.028203 | 4.768624 | 40.826281 | C  | 47.979435 | 5.804256 | 32.353641 |
| C | 52.442128 | 5.287648 | 39.677330 | C  | 46.725970 | 5.487855 | 46.521587 |
| C | 53.229054 | 5.591652 | 38.571278 | C  | 45.690904 | 4.748340 | 45.911366 |
| C | 54.601054 | 5.377632 | 38.616177 | C  | 44.602045 | 4.310535 | 46.658962 |
| C | 55.187129 | 4.858609 | 39.764128 | C  | 45.923435 | 4.505833 | 32.498550 |
| O | 55.314970 | 5.617639 | 37.405129 | C  | 46.898665 | 5.299268 | 33.118136 |
| O | 50.334834 | 5.883804 | 41.714713 | O  | 44.856669 | 4.019878 | 33.246186 |
| O | 49.996875 | 3.700778 | 42.178505 | O  | 48.292873 | 6.577972 | 43.534085 |
| C | 50.770338 | 4.698682 | 41.950287 | O  | 47.921800 | 4.394867 | 43.967368 |
| C | 48.263532 | 4.276553 | 37.806954 | C  | 48.039656 | 5.617005 | 44.344774 |
| C | 49.064684 | 3.231121 | 37.313007 | C  | 9.830848  | 7.260896 | 57.522290 |
| C | 49.130689 | 2.966326 | 35.951763 | C  | 8.959816  | 6.502907 | 56.749315 |
| C | 48.393345 | 3.735739 | 35.058969 | C  | 9.429783  | 5.394908 | 56.054291 |
| C | 47.555168 | 4.776815 | 35.509025 | C  | 10.771783 | 5.042898 | 56.134241 |
| C | 47.475794 | 5.041598 | 36.902770 | C  | 10.370718 | 3.178911 | 54.666243 |
| C | 46.588970 | 6.038082 | 37.357516 | C  | 9.028718  | 3.528920 | 54.587293 |
| C | 45.841044 | 6.779765 | 36.451836 | C  | 8.558750  | 4.637919 | 55.281317 |
| C | 45.934707 | 6.555388 | 35.088546 | O  | 8.125684  | 2.792932 | 53.781319 |
| C | 46.796310 | 5.551202 | 34.591925 | Cu | 15.896957 | 6.130335 | 57.133641 |
| O | 45.170715 | 7.376475 | 34.262024 | Cu | 15.343014 | 3.718176 | 57.555128 |
| O | 48.443581 | 5.768943 | 39.656391 | C  | 19.601536 | 4.035625 | 57.442993 |
| O | 48.127600 | 3.577282 | 40.084917 | C  | 20.154869 | 3.267310 | 58.483441 |
| C | 48.279347 | 4.556421 | 39.268865 | C  | 21.509560 | 2.958686 | 58.499025 |
| C | 44.175389 | 5.624434 | 41.417677 | C  | 22.334393 | 3.401248 | 57.470431 |
| C | 43.550958 | 6.661791 | 42.133823 | C  | 21.818658 | 4.147179 | 56.393563 |
| C | 43.983417 | 3.795344 | 39.764612 | C  | 20.432709 | 4.457270 | 56.367264 |
| O | 46.412712 | 6.448344 | 41.455940 | C  | 19.909416 | 5.146813 | 55.252654 |
| O | 46.077707 | 4.255062 | 41.862918 | C  | 20.745247 | 5.549212 | 54.215767 |
| C | 45.641650 | 5.430556 | 41.587069 | C  | 22.111136 | 5.281562 | 54.257676 |

|   |           |          |           |    |           |          |           |
|---|-----------|----------|-----------|----|-----------|----------|-----------|
| C | 22.659618 | 4.572964 | 55.335514 | C  | 15.283046 | 5.695821 | 61.352095 |
| O | 22.934040 | 5.690249 | 53.214005 | C  | 16.314087 | 6.385804 | 61.978046 |
| O | 17.798843 | 5.587237 | 57.303090 | C  | 17.683009 | 6.749178 | 47.689157 |
| O | 17.308503 | 3.416493 | 57.675184 | C  | 16.576415 | 6.374872 | 48.442240 |
| C | 18.150753 | 4.366653 | 57.486391 | C  | 15.505955 | 5.668178 | 47.861918 |
| C | 15.666745 | 4.198505 | 53.323644 | C  | 14.198081 | 5.242825 | 62.095148 |
| C | 16.366386 | 3.081515 | 52.831500 | C  | 13.166040 | 4.552842 | 61.469196 |
| C | 16.402031 | 2.804239 | 51.472152 | C  | 12.083075 | 4.099846 | 62.213249 |
| C | 15.732371 | 3.631277 | 50.578486 | C  | 13.306496 | 4.634431 | 48.020152 |
| C | 14.998414 | 4.749555 | 51.025095 | C  | 14.372977 | 5.307067 | 48.632533 |
| C | 14.953156 | 5.031495 | 52.417603 | O  | 12.191186 | 4.284958 | 48.773413 |
| C | 14.167565 | 6.110835 | 52.868751 | O  | 15.760967 | 6.375009 | 59.107409 |
| C | 13.486220 | 6.911729 | 51.960597 | O  | 15.280157 | 4.203570 | 59.480105 |
| C | 13.549254 | 6.668437 | 50.598514 | C  | 15.448019 | 5.407827 | 59.892814 |
| C | 14.307125 | 5.582146 | 50.105376 | Cu | 31.493229 | 6.166581 | 57.140626 |
| O | 12.862739 | 7.553160 | 49.769720 | Cu | 30.980124 | 3.741220 | 57.541332 |
| O | 15.951999 | 5.642505 | 55.205194 | C  | 35.224796 | 4.101424 | 57.472975 |
| O | 15.439659 | 3.478834 | 55.583195 | C  | 35.770934 | 3.382404 | 58.552001 |
| C | 15.687138 | 4.456438 | 54.789882 | C  | 37.117401 | 3.041866 | 58.573712 |
| C | 11.644816 | 5.800887 | 56.909216 | C  | 37.940519 | 3.401015 | 57.512444 |
| C | 11.172849 | 6.908886 | 57.603240 | C  | 37.432836 | 4.101807 | 56.401586 |
| C | 25.331306 | 7.112378 | 57.539057 | C  | 36.055282 | 4.447858 | 56.371798 |
| C | 24.492633 | 6.275286 | 56.812944 | C  | 35.538487 | 5.096661 | 55.230970 |
| C | 24.999883 | 5.164836 | 56.107538 | C  | 36.372859 | 5.418149 | 54.164899 |
| C | 26.395782 | 4.899857 | 56.152365 | C  | 37.732026 | 5.115698 | 54.207584 |
| C | 11.243751 | 3.934900 | 55.440217 | C  | 38.275075 | 4.451870 | 55.316898 |
| C | 26.058114 | 3.023021 | 54.648676 | O  | 38.554041 | 5.448825 | 53.137027 |
| C | 24.691614 | 3.246495 | 54.628152 | O  | 33.408936 | 5.642702 | 57.295096 |
| C | 24.137128 | 4.321344 | 55.358892 | O  | 32.942108 | 3.468091 | 57.677745 |
| O | 23.919780 | 2.356745 | 53.884198 | C  | 33.773363 | 4.426631 | 57.492608 |
| O | 13.941741 | 6.427403 | 56.970065 | C  | 31.395073 | 4.256839 | 53.314992 |
| O | 13.435243 | 4.267524 | 57.371435 | C  | 32.172156 | 3.177986 | 52.854367 |
| C | 13.092592 | 5.472587 | 57.085029 | C  | 32.317925 | 2.931620 | 51.496201 |

|   |           |          |           |    |           |          |           |
|---|-----------|----------|-----------|----|-----------|----------|-----------|
| C | 31.679413 | 3.748766 | 50.571370 | C  | 29.475255 | 4.518460 | 47.953734 |
| C | 30.861751 | 4.819405 | 50.984626 | C  | 30.360335 | 5.386845 | 48.589548 |
| C | 30.712622 | 5.077521 | 52.374170 | O  | 28.436680 | 3.971614 | 48.644703 |
| C | 29.862144 | 6.123750 | 52.784138 | O  | 31.368156 | 6.391796 | 59.113878 |
| C | 29.207535 | 6.907184 | 51.839149 | O  | 30.898690 | 4.214666 | 59.469686 |
| C | 29.355444 | 6.671753 | 50.482469 | C  | 31.062618 | 5.416831 | 59.891226 |
| C | 30.188344 | 5.627412 | 50.037632 | Cu | 47.050011 | 6.245486 | 57.147657 |
| O | 28.662569 | 7.509789 | 49.613088 | Cu | 46.687934 | 3.790000 | 57.535560 |
| O | 31.550690 | 5.701704 | 55.207583 | C  | 50.914829 | 4.464394 | 57.493750 |
| O | 31.102310 | 3.520492 | 55.565304 | C  | 51.500923 | 3.947364 | 58.641689 |
| C | 31.339063 | 4.509390 | 54.781714 | C  | 52.873923 | 3.732339 | 58.685563 |
| C | 27.242426 | 5.733657 | 56.935557 | C  | 53.659830 | 4.036343 | 57.580498 |
| C | 26.692503 | 6.846716 | 57.598363 | C  | 53.073736 | 4.554373 | 56.431559 |
| C | 40.908547 | 6.948047 | 57.604877 | C  | 51.700736 | 4.768398 | 56.388685 |
| C | 40.085230 | 6.125726 | 56.847607 | C  | 51.114643 | 5.287428 | 55.239746 |
| C | 40.605186 | 5.027150 | 56.131980 | C  | 51.901549 | 5.591433 | 54.133681 |
| C | 42.001847 | 4.765209 | 56.190534 | C  | 53.273549 | 5.377407 | 54.178555 |
| C | 26.910388 | 3.833065 | 55.388822 | C  | 53.859642 | 4.858378 | 55.326493 |
| C | 41.686853 | 2.906556 | 54.661044 | O  | 53.987445 | 5.617415 | 52.967495 |
| C | 40.320063 | 3.129903 | 54.621946 | O  | 48.990680 | 5.856371 | 57.298541 |
| C | 39.753251 | 4.195246 | 55.357878 | O  | 48.674005 | 3.652645 | 57.671141 |
| O | 39.559971 | 2.244494 | 53.861099 | C  | 49.438132 | 4.670426 | 57.497775 |
| O | 29.524717 | 6.434179 | 56.999616 | C  | 46.966792 | 4.346688 | 53.316152 |
| O | 29.069322 | 4.254245 | 57.352820 | C  | 47.788400 | 3.324753 | 52.806444 |
| C | 28.697937 | 5.457257 | 57.101800 | C  | 47.835450 | 3.060767 | 51.445053 |
| C | 30.903120 | 5.695641 | 61.351269 | C  | 47.058023 | 3.807041 | 50.567788 |
| C | 31.934175 | 6.385618 | 61.977205 | C  | 46.206569 | 4.831185 | 51.032983 |
| C | 33.402065 | 7.447201 | 47.709669 | C  | 46.148654 | 5.096509 | 52.427571 |
| C | 32.378929 | 6.883219 | 48.441371 | C  | 45.251375 | 6.075286 | 52.898830 |
| C | 31.452099 | 5.962181 | 47.852472 | C  | 44.470388 | 6.799510 | 52.006893 |
| C | 29.818167 | 5.242646 | 62.094340 | C  | 44.541563 | 6.574956 | 50.641951 |
| C | 28.786113 | 4.552669 | 61.468405 | C  | 45.414245 | 5.587965 | 50.129348 |
| C | 27.703159 | 4.099675 | 62.212476 | O  | 43.750592 | 7.384784 | 49.830053 |



|   |           |          |           |   |           |          |           |
|---|-----------|----------|-----------|---|-----------|----------|-----------|
| O | 47.122657 | 5.791045 | 55.211459 | C | 28.683314 | 5.025635 | 64.206417 |
| O | 46.814785 | 3.584303 | 55.564229 | O | 26.563309 | 3.908663 | 64.360554 |
| C | 46.968354 | 4.589931 | 54.783311 | C | 47.502389 | 6.620356 | 63.345091 |
| C | 42.835814 | 5.596584 | 56.988823 | C | 46.419447 | 6.168363 | 64.088179 |
| C | 42.269183 | 6.688951 | 57.672903 | C | 45.387379 | 5.478391 | 63.463260 |
| C | 42.528628 | 3.709132 | 55.421752 | C | 43.271369 | 4.336426 | 63.580429 |
| O | 45.075723 | 6.394140 | 57.019367 | C | 44.303437 | 5.025398 | 64.205349 |
| O | 44.741876 | 4.189036 | 57.352493 | O | 42.183431 | 3.908432 | 64.359519 |
| C | 44.303759 | 5.375059 | 57.121575 | H | 12.119159 | 8.126827 | 26.936072 |
| C | 46.523195 | 5.695406 | 61.350162 | H | 10.572984 | 6.786747 | 25.566706 |
| C | 47.554262 | 6.385378 | 61.976082 | H | 13.382156 | 2.321981 | 22.983480 |
| C | 48.691839 | 7.084784 | 47.763546 | H | 9.847346  | 3.169311 | 22.676901 |
| C | 47.609526 | 6.614109 | 48.497340 | H | 22.127848 | 2.839685 | 28.221483 |
| C | 46.616042 | 5.814794 | 47.899484 | H | 24.530822 | 2.316733 | 28.282772 |
| C | 45.438253 | 5.242413 | 62.093251 | H | 26.022480 | 3.134894 | 26.532055 |
| C | 44.406185 | 4.552442 | 61.467332 | H | 21.516963 | 5.321122 | 24.086791 |
| C | 43.323243 | 4.099449 | 62.211421 | H | 23.017612 | 6.078578 | 22.355810 |
| C | 44.515454 | 4.588341 | 48.020908 | H | 19.533170 | 2.330412 | 22.589857 |
| C | 45.510637 | 5.347289 | 48.652384 | H | 19.680014 | 1.794584 | 20.190457 |
| O | 43.424196 | 4.139520 | 48.756095 | H | 18.480979 | 3.170983 | 18.536721 |
| O | 46.919520 | 6.442019 | 59.121962 | H | 16.652823 | 6.145242 | 22.827204 |
| O | 46.573993 | 4.237901 | 59.463246 | H | 15.507812 | 7.502163 | 21.163761 |
| C | 46.675103 | 5.443060 | 59.890815 | H | 14.495470 | 7.508172 | 27.087708 |
| C | 16.262162 | 6.620790 | 63.347051 | H | 27.609840 | 8.064586 | 26.968306 |
| C | 15.179196 | 6.168795 | 64.090104 | H | 26.115919 | 6.563608 | 25.761577 |
| C | 14.147156 | 5.478812 | 63.465153 | H | 14.941302 | 3.633425 | 24.314678 |
| C | 12.031150 | 4.336833 | 63.582254 | H | 29.119970 | 2.158596 | 23.171370 |
| C | 13.063191 | 5.025817 | 64.207206 | H | 19.787995 | 6.917214 | 30.337297 |
| O | 10.943187 | 3.908837 | 64.361307 | H | 15.677665 | 4.562373 | 29.264687 |
| C | 31.882275 | 6.620600 | 63.346211 | H | 13.759583 | 3.870709 | 30.560534 |
| C | 30.799322 | 6.168606 | 64.089282 | H | 15.672801 | 6.862041 | 17.596254 |
| C | 29.767267 | 5.478629 | 63.464346 | H | 25.148264 | 6.261100 | 21.550605 |
| C | 27.651260 | 4.336658 | 63.581482 | H | 25.597704 | 2.533464 | 23.003070 |

|   |           |          |           |   |           |          |           |
|---|-----------|----------|-----------|---|-----------|----------|-----------|
| H | 37.751162 | 2.964211 | 28.293605 | H | 50.949458 | 7.231720 | 30.274378 |
| H | 40.131831 | 2.353679 | 28.362854 | H | 47.068335 | 4.470653 | 29.317530 |
| H | 41.619966 | 2.963043 | 26.527986 | H | 45.238778 | 3.636783 | 30.655271 |
| H | 37.165643 | 5.168665 | 24.006466 | H | 46.905492 | 6.856629 | 17.596458 |
| H | 38.663895 | 5.718240 | 22.190857 | H | 56.056663 | 5.972847 | 21.101661 |
| H | 35.151163 | 2.330450 | 22.590854 | H | 10.790666 | 8.127121 | 42.499746 |
| H | 35.299188 | 1.794023 | 20.190321 | H | 9.244381  | 6.786934 | 41.130428 |
| H | 34.100286 | 3.170644 | 18.536512 | H | 12.054227 | 2.324769 | 38.543663 |
| H | 32.264504 | 6.143031 | 22.826101 | H | 8.520773  | 3.174742 | 38.234340 |
| H | 31.125346 | 7.500398 | 21.163796 | H | 20.656016 | 2.469458 | 43.583413 |
| H | 30.020416 | 7.596023 | 27.090474 | H | 23.025897 | 1.823598 | 43.675194 |
| H | 43.100826 | 7.731899 | 27.013706 | H | 24.608959 | 2.680807 | 42.028320 |
| H | 41.670889 | 6.243968 | 25.726625 | H | 20.280690 | 5.174019 | 39.562798 |
| H | 30.636782 | 3.610062 | 24.385483 | H | 21.877963 | 5.985530 | 37.942717 |
| H | 44.806410 | 1.907836 | 23.171351 | H | 17.976786 | 2.198157 | 37.880896 |
| H | 35.799145 | 6.663525 | 30.288487 | H | 17.985696 | 1.759402 | 35.461618 |
| H | 31.373892 | 4.900252 | 29.377816 | H | 16.854199 | 3.274079 | 33.925082 |
| H | 29.362648 | 4.657996 | 30.707795 | H | 15.241374 | 6.173274 | 38.402738 |
| H | 31.288110 | 6.858506 | 17.596666 | H | 14.090991 | 7.633516 | 36.841942 |
| H | 40.789716 | 5.770258 | 21.353139 | H | 13.169407 | 7.506551 | 42.649954 |
| H | 41.288191 | 2.253638 | 22.889256 | H | 25.768220 | 6.972946 | 43.834584 |
| H | 53.552127 | 3.700083 | 28.381371 | H | 24.521602 | 5.884857 | 42.057171 |
| H | 55.987740 | 3.326273 | 28.455788 | H | 13.612236 | 3.636038 | 39.861593 |
| H | 57.384073 | 3.866388 | 26.498019 | H | 28.141947 | 2.531529 | 38.647279 |
| H | 52.703541 | 5.453680 | 24.016083 | H | 18.620588 | 6.713812 | 45.769884 |
| H | 54.081156 | 5.977629 | 22.117498 | H | 19.596948 | 7.445477 | 32.732251 |
| H | 50.777317 | 2.334859 | 22.589463 | H | 17.666041 | 6.687190 | 34.017422 |
| H | 50.920660 | 1.795085 | 20.189814 | H | 14.425301 | 4.445231 | 44.834398 |
| H | 49.720320 | 3.170696 | 18.535982 | H | 12.514193 | 3.845953 | 46.183381 |
| H | 47.864072 | 6.134779 | 22.823826 | H | 12.724174 | 3.703506 | 32.591798 |
| H | 46.741772 | 7.497709 | 21.163581 | H | 14.099991 | 7.293500 | 33.311977 |
| H | 45.515651 | 7.316576 | 27.169424 | H | 24.052959 | 6.207354 | 37.276470 |
| H | 46.268662 | 3.356959 | 24.458276 | H | 24.742275 | 2.714281 | 38.128101 |

|                                |                                |
|--------------------------------|--------------------------------|
| H 36.303182 2.252371 43.048322 | H 45.167161 7.547128 36.808919 |
| H 38.701615 1.512373 43.022659 | H 44.137991 7.311019 42.773900 |
| H 40.296129 2.516555 41.459227 | H 45.052389 3.611694 39.761507 |
| H 35.961879 5.406728 39.412756 | H 49.661435 7.132278 45.860374 |
| H 37.514950 6.310516 37.753885 | H 50.733735 7.805095 32.657226 |
| H 33.111757 2.753270 38.231717 | H 48.891827 6.909206 33.984928 |
| H 33.118811 2.141318 35.801358 | H 45.698879 4.507722 44.853648 |
| H 32.328048 3.721990 34.122718 | H 43.822423 3.742806 46.169493 |
| H 31.387925 7.241502 38.367334 | H 44.238280 3.437018 32.701881 |
| H 30.470557 8.809968 36.677152 | H 45.266051 7.150642 33.286705 |
| H 28.244952 6.705342 44.005084 | H 54.726277 5.964590 36.662270 |
| H 41.710196 7.658881 42.617085 | H 9.463471 8.127242 58.062677  |
| H 40.343784 6.230804 41.196235 | H 7.917013 6.786968 56.693503  |
| H 29.414410 3.698987 40.416622 | H 10.726750 2.324424 54.107290 |
| H 43.652037 2.236156 38.327263 | H 7.193971 3.176463 53.795181  |
| H 34.376731 7.577521 45.763745 | H 19.525093 2.917590 59.293808 |
| H 35.744061 7.305928 32.662438 | H 21.924738 2.374128 59.313640 |
| H 33.725447 6.968110 33.990486 | H 23.383992 3.143404 57.514614 |
| H 30.826763 4.430364 44.827419 | H 18.852991 5.373979 55.157456 |
| H 28.948574 3.522712 46.090199 | H 20.320611 6.078516 53.373652 |
| H 28.321302 4.836971 32.737796 | H 16.893904 2.425625 53.515113 |
| H 30.260555 8.226292 33.284489 | H 16.951229 1.942306 51.107131 |
| H 39.632050 6.485877 37.101966 | H 15.780258 3.378383 49.528904 |
| H 40.127375 2.540768 37.982456 | H 14.056655 6.347416 53.920669 |
| H 52.223553 3.704450 43.946028 | H 12.892203 7.743768 52.314430 |
| H 54.659162 3.326903 44.019411 | H 11.840840 7.509112 58.212090 |
| H 56.055345 3.866258 42.061246 | H 24.920988 7.968486 58.064840 |
| H 51.374898 5.455144 39.580821 | H 23.438719 6.513772 56.793396 |
| H 52.752355 5.977675 37.680876 | H 12.284929 3.636004 55.428338 |
| H 49.653585 2.628247 37.995229 | H 26.460596 2.201131 54.071655 |
| H 49.760225 2.162369 35.584267 | H 17.168637 6.738882 61.410809 |
| H 48.471038 3.498193 34.007572 | H 18.493200 7.302635 48.153202 |
| H 46.448329 6.252366 38.410675 | H 16.556877 6.653796 49.487073 |

|   |           |          |           |   |           |          |           |
|---|-----------|----------|-----------|---|-----------|----------|-----------|
| H | 13.129886 | 4.375280 | 60.400688 | H | 50.047733 | 5.460083 | 55.146221 |
| H | 11.278530 | 3.573284 | 61.719392 | H | 51.424943 | 5.978593 | 53.243684 |
| H | 11.508991 | 3.772563 | 48.234503 | H | 48.399592 | 2.732237 | 53.478118 |
| H | 12.949052 | 7.325522 | 48.793932 | H | 48.476268 | 2.271325 | 51.065939 |
| H | 22.432863 | 6.212315 | 52.510688 | H | 47.116379 | 3.564350 | 49.516506 |
| H | 22.939559 | 2.581520 | 53.895015 | H | 45.130063 | 6.290326 | 53.954363 |
| H | 35.139653 | 3.087928 | 59.382842 | H | 43.789093 | 7.554547 | 52.376027 |
| H | 37.526131 | 2.492298 | 59.415498 | H | 42.896660 | 7.342608 | 58.268620 |
| H | 38.982316 | 3.114189 | 57.559103 | H | 43.589937 | 3.493204 | 55.383473 |
| H | 34.488848 | 5.356362 | 55.141244 | H | 48.405632 | 6.744712 | 61.407899 |
| H | 35.953705 | 5.915608 | 53.300840 | H | 49.441028 | 7.708395 | 48.240627 |
| H | 32.683025 | 2.534190 | 53.561862 | H | 47.545915 | 6.891982 | 49.540645 |
| H | 32.931713 | 2.103525 | 51.156022 | H | 44.382265 | 4.363741 | 60.399533 |
| H | 31.817932 | 3.523762 | 49.522025 | H | 42.520045 | 3.570487 | 61.717812 |
| H | 29.677439 | 6.342710 | 53.830312 | H | 42.791572 | 3.579309 | 48.204113 |
| H | 28.556004 | 7.709026 | 52.160957 | H | 43.823712 | 7.153949 | 48.854153 |
| H | 27.329938 | 7.501859 | 58.181569 | H | 53.398323 | 5.962111 | 52.223839 |
| H | 40.488060 | 7.792878 | 58.140667 | H | 17.068432 | 7.157664 | 63.836093 |
| H | 39.032715 | 6.367301 | 56.813869 | H | 15.148320 | 6.357113 | 65.155593 |
| H | 27.970911 | 3.615792 | 55.336811 | H | 10.261871 | 3.422767 | 63.797768 |
| H | 42.098175 | 2.091864 | 54.080124 | H | 32.688170 | 7.158104 | 63.835112 |
| H | 32.787754 | 6.740463 | 61.409645 | H | 30.768185 | 6.357209 | 65.154692 |
| H | 34.088437 | 8.152666 | 48.188674 | H | 25.878843 | 3.428365 | 63.795764 |
| H | 32.275526 | 7.157092 | 49.496215 | H | 48.307461 | 7.159245 | 63.833714 |
| H | 28.750420 | 4.374011 | 60.400069 | H | 46.387892 | 6.357470 | 65.153466 |
| H | 26.898505 | 3.573238 | 61.718568 | H | 41.497433 | 3.430873 | 63.794145 |
| H | 27.936718 | 3.375786 | 48.062979 | H | 54.922567 | 4.682846 | 55.325478 |
| H | 28.731063 | 7.222937 | 48.647949 | H | 56.250101 | 4.683220 | 39.763356 |
| H | 38.060431 | 5.949432 | 52.412877 | H | 57.578915 | 4.683550 | 24.200270 |
| H | 38.580999 | 2.474050 | 53.852663 | H | 32.654261 | 5.043700 | 18.026448 |
| H | 50.894972 | 3.699559 | 59.506234 | H | 17.034621 | 5.043815 | 18.026611 |
| H | 53.331514 | 3.325299 | 59.581218 | H | 10.176491 | 4.915057 | 24.089421 |
| H | 54.727814 | 3.865552 | 57.623269 | H | 8.847860  | 4.915122 | 39.653415 |

|   |           |           |           |                            |           |          |           |
|---|-----------|-----------|-----------|----------------------------|-----------|----------|-----------|
| H | 7.520401  | 4.915037  | 55.216677 | H                          | 30.363639 | 8.166258 | 45.361626 |
| H | 12.998593 | 5.198764  | 65.269045 | H                          | 29.690296 | 8.214552 | 42.965295 |
| H | 28.618469 | 5.198756  | 65.268177 | H                          | 29.045067 | 9.624832 | 42.289282 |
| H | 44.238356 | 5.198674  | 65.267044 |                            |           |          |           |
| H | 48.274031 | 5.043552  | 18.025976 |                            |           |          |           |
| C | 31.753376 | 8.907526  | 41.007037 | (R,R)-2-Int1(QM(B3LYP)/MM) |           |          |           |
| C | 31.811583 | 9.287648  | 42.430664 | C                          | 12.487000 | 7.261000 | 26.395000 |
| C | 32.268290 | 10.653124 | 42.846404 | C                          | 11.616000 | 6.503000 | 25.622000 |
| C | 31.958905 | 11.745848 | 41.811579 | C                          | 12.086000 | 5.395000 | 24.927000 |
| C | 32.336584 | 11.307626 | 40.389282 | C                          | 13.428000 | 5.043000 | 25.007000 |
| C | 31.581698 | 10.032137 | 39.990446 | C                          | 13.027000 | 3.179000 | 23.539000 |
| O | 33.102891 | 8.561755  | 41.240503 | C                          | 11.685000 | 3.529000 | 23.460000 |
| C | 29.364785 | 9.776949  | 44.304600 | C                          | 11.215000 | 4.638000 | 24.154000 |
| C | 28.693914 | 11.005227 | 44.445723 | O                          | 10.782000 | 2.793000 | 22.654000 |
| C | 28.492768 | 11.559966 | 45.712487 | Cu                         | 18.543389 | 6.093520 | 26.011808 |
| C | 28.961513 | 10.906025 | 46.856921 | Cu                         | 17.953971 | 3.705471 | 26.529203 |
| C | 29.634516 | 9.686328  | 46.719141 | C                          | 22.219053 | 3.968720 | 26.386829 |
| C | 29.834880 | 9.119605  | 45.457844 | C                          | 22.758962 | 3.211516 | 27.442034 |
| N | 29.635790 | 9.245504  | 43.028853 | C                          | 24.114194 | 2.908019 | 27.481615 |
| H | 31.824190 | 10.887457 | 43.830793 | C                          | 24.954265 | 3.348633 | 26.464252 |
| H | 31.874953 | 8.471424  | 43.145930 | C                          | 24.452113 | 4.081250 | 25.371842 |
| H | 31.111681 | 8.041310  | 40.779563 | C                          | 23.064379 | 4.379308 | 25.317552 |
| H | 32.488513 | 12.674763 | 42.089006 | C                          | 22.554478 | 5.044938 | 24.182159 |
| H | 30.876970 | 11.981857 | 41.844455 | C                          | 23.405523 | 5.444627 | 23.156624 |
| H | 32.115080 | 12.115137 | 39.668483 | C                          | 24.773257 | 5.194055 | 23.228558 |
| H | 33.424232 | 11.117638 | 40.335496 | C                          | 25.307941 | 4.502928 | 24.324206 |
| H | 30.497905 | 10.247392 | 39.895668 | O                          | 25.611528 | 5.596432 | 22.194616 |
| H | 31.920804 | 9.662197  | 39.006656 | O                          | 20.435204 | 5.531625 | 26.186759 |
| H | 33.357917 | 10.583815 | 43.022608 | O                          | 19.917759 | 3.385421 | 26.652888 |
| H | 28.323570 | 11.524379 | 43.554589 | C                          | 20.771687 | 4.315563 | 26.418487 |
| H | 27.962512 | 12.513805 | 45.802263 | C                          | 18.226927 | 4.022014 | 22.293999 |
| H | 28.805122 | 11.340525 | 47.848621 | C                          | 18.992915 | 2.941012 | 21.873981 |
| H | 30.017409 | 9.170324  | 47.605141 | C                          | 19.081890 | 2.638017 | 20.519979 |
|   |           |           |           | C                          | 18.404876 | 3.417023 | 19.587993 |

|    |           |          |           |    |           |          |           |
|----|-----------|----------|-----------|----|-----------|----------|-----------|
| C  | 17.639888 | 4.497024 | 20.008011 | Cu | 33.584785 | 3.688078 | 26.554784 |
| C  | 17.550913 | 4.800019 | 21.362013 | C  | 37.839710 | 3.949002 | 26.405318 |
| C  | 16.783924 | 5.881020 | 21.784030 | C  | 38.362469 | 3.237486 | 27.500731 |
| C  | 16.107910 | 6.659026 | 20.850045 | C  | 39.707458 | 2.896101 | 27.554433 |
| C  | 16.197885 | 6.355031 | 19.497042 | C  | 40.554268 | 3.250257 | 26.510314 |
| C  | 16.963875 | 5.274030 | 19.076025 | C  | 40.070124 | 3.940205 | 25.382336 |
| O  | 15.523872 | 7.185037 | 18.539057 | C  | 38.692505 | 4.281332 | 25.316938 |
| O  | 18.565768 | 5.532734 | 24.109215 | C  | 38.199412 | 4.911047 | 24.155116 |
| O  | 18.026774 | 3.391676 | 24.575316 | C  | 39.058031 | 5.226056 | 23.106213 |
| C  | 18.266858 | 4.338639 | 23.745095 | C  | 40.417656 | 4.933222 | 23.186189 |
| C  | 14.301000 | 5.801000 | 25.782000 | C  | 40.936107 | 4.283011 | 24.314717 |
| C  | 13.829000 | 6.909000 | 26.476000 | O  | 41.264380 | 5.259399 | 22.132544 |
| C  | 27.983603 | 7.128254 | 26.428545 | O  | 36.054710 | 5.515562 | 26.161815 |
| C  | 27.141849 | 6.260995 | 25.740761 | O  | 35.544016 | 3.372797 | 26.651694 |
| C  | 27.646938 | 5.121530 | 25.081443 | C  | 36.394509 | 4.302275 | 26.410990 |
| C  | 29.042088 | 4.857007 | 25.136739 | C  | 33.846854 | 4.021972 | 22.293718 |
| C  | 13.900000 | 3.935000 | 24.313000 | C  | 34.612831 | 2.940969 | 21.873683 |
| C  | 28.704528 | 2.927036 | 23.701556 | C  | 34.701781 | 2.637978 | 20.519678 |
| C  | 27.337923 | 3.147930 | 23.675939 | C  | 34.024753 | 3.416989 | 19.587708 |
| C  | 26.784049 | 4.249480 | 24.366207 | C  | 33.259776 | 4.496991 | 20.007741 |
| O  | 26.565752 | 2.233356 | 22.962602 | C  | 33.170826 | 4.799983 | 21.361747 |
| O  | 16.595425 | 6.406541 | 25.846065 | C  | 32.403848 | 5.880986 | 21.783781 |
| O  | 16.058107 | 4.267003 | 26.318225 | C  | 31.727821 | 6.658997 | 20.849810 |
| C  | 15.736670 | 5.464001 | 25.982331 | C  | 31.817771 | 6.355005 | 19.496805 |
| C  | 17.908463 | 5.833300 | 30.225366 | C  | 32.583748 | 5.274002 | 19.075771 |
| C  | 18.908446 | 6.576167 | 30.878530 | O  | 31.143743 | 7.185016 | 18.538835 |
| C  | 16.746342 | 5.439795 | 30.945650 | O  | 34.144575 | 5.530088 | 24.122906 |
| C  | 15.664944 | 4.790826 | 30.312393 | O  | 33.635689 | 3.382650 | 24.586431 |
| C  | 14.546055 | 4.406248 | 31.045034 | C  | 33.868136 | 4.332575 | 23.753903 |
| O  | 18.430777 | 6.414945 | 27.972245 | C  | 29.888974 | 5.717225 | 25.890201 |
| O  | 17.898427 | 4.270165 | 28.429535 | C  | 29.343999 | 6.860397 | 26.501960 |
| C  | 18.096819 | 5.485196 | 28.791654 | C  | 43.544603 | 6.867001 | 26.536788 |
| Cu | 34.150830 | 6.078667 | 26.030080 | C  | 42.726436 | 6.007778 | 25.814562 |

|    |           |          |           |   |           |          |           |
|----|-----------|----------|-----------|---|-----------|----------|-----------|
| C  | 43.255156 | 4.887901 | 25.139193 | C | 52.093032 | 4.660900 | 26.379880 |
| C  | 44.653138 | 4.637704 | 25.209532 | C | 49.466779 | 4.021876 | 22.293156 |
| C  | 29.556695 | 3.763670 | 24.410985 | C | 50.232745 | 2.940872 | 21.873104 |
| C  | 44.354515 | 2.720668 | 23.750486 | C | 50.321669 | 2.637885 | 20.519096 |
| C  | 42.987099 | 2.937149 | 23.695284 | C | 49.644627 | 3.416901 | 19.587140 |
| C  | 42.412146 | 4.026039 | 24.388689 | C | 48.879661 | 4.496905 | 20.007192 |
| O  | 42.235099 | 2.027064 | 22.955463 | C | 48.790737 | 4.799893 | 21.361200 |
| O  | 32.183323 | 6.385534 | 25.921334 | C | 48.023772 | 5.880897 | 21.783251 |
| O  | 31.686099 | 4.236278 | 26.389852 | C | 47.347731 | 6.658913 | 20.849295 |
| C  | 31.338413 | 5.430921 | 26.076916 | C | 47.437655 | 6.354926 | 19.496287 |
| C  | 33.692082 | 5.814365 | 30.263540 | C | 48.203620 | 5.273922 | 19.075235 |
| C  | 34.753652 | 6.524763 | 30.853207 | O | 46.763613 | 7.184943 | 18.538331 |
| C  | 32.546227 | 5.495874 | 31.044228 | O | 49.728668 | 5.587428 | 24.094527 |
| C  | 31.422745 | 4.853163 | 30.483990 | O | 49.389147 | 3.418678 | 24.604135 |
| C  | 30.310402 | 4.568113 | 31.271272 | C | 49.525187 | 4.365626 | 23.749813 |
| O  | 34.092730 | 6.391453 | 27.990966 | C | 45.480619 | 5.508628 | 25.970297 |
| O  | 33.565131 | 4.248988 | 28.463869 | C | 44.907929 | 6.623419 | 26.609861 |
| C  | 33.791871 | 5.461315 | 28.821582 | C | 45.188540 | 3.554091 | 24.486034 |
| Cu | 49.691371 | 6.192763 | 25.991549 | O | 47.713164 | 6.319089 | 25.892417 |
| Cu | 49.348445 | 3.770712 | 26.559601 | O | 47.397499 | 4.147956 | 26.416162 |
| C  | 53.571003 | 4.464792 | 26.367939 | C | 46.949843 | 5.308847 | 26.096228 |
| C  | 54.157058 | 3.947774 | 27.515902 | C | 49.186914 | 5.948110 | 30.224814 |
| C  | 55.530059 | 3.732759 | 27.559826 | C | 50.116639 | 6.801052 | 30.846542 |
| C  | 56.316002 | 4.036762 | 26.454787 | C | 48.084368 | 5.450596 | 30.974620 |
| C  | 55.729946 | 4.554780 | 25.305823 | C | 47.065487 | 4.680804 | 30.373652 |
| C  | 54.356947 | 4.768795 | 25.262899 | C | 46.005228 | 4.196950 | 31.133553 |
| C  | 53.770890 | 5.287813 | 24.113936 | O | 49.599567 | 6.540952 | 27.949839 |
| C  | 54.557834 | 5.591815 | 23.007897 | O | 49.299883 | 4.361840 | 28.452845 |
| C  | 55.929834 | 5.377800 | 23.052821 | C | 49.381545 | 5.596779 | 28.791855 |
| C  | 56.515889 | 4.858782 | 24.200784 | C | 11.158286 | 7.260970 | 41.959133 |
| O  | 56.643771 | 5.617805 | 21.841785 | C | 10.287269 | 6.502976 | 41.186145 |
| O  | 51.633905 | 5.831480 | 26.128575 | C | 10.757253 | 5.394976 | 40.491133 |
| O  | 51.338818 | 3.650684 | 26.629128 | C | 12.099253 | 5.042971 | 40.571108 |

|    |           |          |           |    |           |          |           |
|----|-----------|----------|-----------|----|-----------|----------|-----------|
| C  | 11.698221 | 3.178978 | 39.103109 | C  | 16.885806 | 4.304917 | 39.172206 |
| C  | 10.356221 | 3.528983 | 39.024134 | C  | 12.972270 | 5.800966 | 41.346096 |
| C  | 9.886237  | 4.637982 | 39.718146 | C  | 12.500286 | 6.908965 | 42.040108 |
| O  | 9.453204  | 2.792989 | 38.218147 | C  | 26.265794 | 6.458305 | 43.049293 |
| Cu | 17.246459 | 6.010552 | 41.467935 | C  | 25.586300 | 5.828153 | 42.029322 |
| Cu | 16.616358 | 3.630615 | 41.961735 | C  | 26.244465 | 4.959156 | 41.098373 |
| C  | 20.885131 | 3.770470 | 41.751175 | C  | 27.672615 | 4.790913 | 41.245811 |
| C  | 21.367964 | 2.896405 | 42.743166 | C  | 12.571237 | 3.934972 | 39.877096 |
| C  | 22.709238 | 2.539352 | 42.792047 | C  | 27.667256 | 3.313901 | 39.311664 |
| C  | 23.598405 | 3.054094 | 41.856042 | C  | 26.260673 | 3.455196 | 39.170564 |
| C  | 23.160873 | 3.915274 | 40.833268 | C  | 25.541179 | 4.266923 | 40.043903 |
| C  | 21.780681 | 4.246864 | 40.750714 | O  | 25.749980 | 2.719340 | 38.141301 |
| C  | 21.331456 | 5.014432 | 39.656377 | O  | 15.291573 | 6.378441 | 41.369245 |
| C  | 22.235898 | 5.489443 | 38.711198 | O  | 14.728670 | 4.244833 | 41.830724 |
| C  | 23.598560 | 5.231707 | 38.835312 | C  | 14.416135 | 5.452053 | 41.523041 |
| C  | 24.074505 | 4.447532 | 39.892491 | C  | 16.744720 | 5.709265 | 45.695745 |
| O  | 24.488130 | 5.727502 | 37.890685 | C  | 17.777188 | 6.444907 | 46.306379 |
| O  | 19.134645 | 5.392131 | 41.580146 | C  | 18.801880 | 6.882153 | 32.229114 |
| O  | 18.569816 | 3.254360 | 42.022961 | C  | 17.692395 | 6.455829 | 32.951087 |
| C  | 19.445186 | 4.163117 | 41.787528 | C  | 16.652883 | 5.735620 | 32.331192 |
| C  | 16.795854 | 4.038052 | 37.712589 | C  | 15.599171 | 5.348379 | 46.459571 |
| C  | 17.461713 | 2.915397 | 37.189554 | C  | 14.492765 | 4.696158 | 45.875469 |
| C  | 17.472129 | 2.666722 | 35.823759 | C  | 13.388405 | 4.351198 | 46.648615 |
| C  | 16.814929 | 3.532604 | 34.956544 | C  | 14.474610 | 4.648528 | 32.414505 |
| C  | 16.106299 | 4.652887 | 35.438845 | C  | 15.516823 | 5.319349 | 33.068270 |
| C  | 16.076817 | 4.897090 | 36.837484 | O  | 13.352507 | 4.255403 | 33.135342 |
| C  | 15.306234 | 5.971059 | 37.326399 | O  | 17.200218 | 6.302036 | 43.433950 |
| C  | 14.624472 | 6.803518 | 36.447957 | O  | 16.632888 | 4.164064 | 43.877507 |
| C  | 14.679186 | 6.602331 | 35.078762 | C  | 16.871717 | 5.369033 | 44.251384 |
| C  | 15.428448 | 5.527509 | 34.549120 | Cu | 33.687550 | 6.758913 | 41.515715 |
| O  | 13.992410 | 7.514611 | 34.280656 | Cu | 32.444789 | 4.139643 | 42.157863 |
| O  | 17.208464 | 5.486550 | 39.554994 | C  | 36.602564 | 3.596623 | 41.569473 |
| O  | 16.634906 | 3.348598 | 39.990596 | C  | 37.047761 | 2.706403 | 42.529742 |



|   |           |          |           |    |           |          |           |
|---|-----------|----------|-----------|----|-----------|----------|-----------|
| C | 38.398272 | 2.288530 | 42.538061 | C  | 43.237707 | 2.782589 | 39.014468 |
| C | 39.285136 | 2.762237 | 41.595221 | C  | 41.863404 | 2.935432 | 38.934974 |
| C | 38.866149 | 3.648871 | 40.549776 | C  | 41.228366 | 3.964469 | 39.656458 |
| C | 37.481592 | 4.043561 | 40.525011 | O  | 41.169165 | 2.030025 | 38.137271 |
| C | 37.030192 | 4.847512 | 39.439267 | O  | 30.435031 | 6.509806 | 42.840357 |
| C | 37.892035 | 5.262140 | 38.453015 | O  | 30.469489 | 4.352328 | 42.294948 |
| C | 39.273926 | 4.945249 | 38.513748 | C  | 29.859414 | 5.447740 | 42.482595 |
| C | 39.765661 | 4.151335 | 39.548182 | C  | 32.714644 | 6.308235 | 45.750183 |
| O | 40.118572 | 5.425059 | 37.558305 | C  | 33.559339 | 7.220633 | 46.359749 |
| O | 35.091729 | 5.398961 | 41.500158 | C  | 34.716833 | 6.881761 | 32.194380 |
| O | 34.281870 | 3.388092 | 42.059483 | C  | 33.610516 | 6.552622 | 32.968709 |
| C | 35.217250 | 4.159933 | 41.711119 | C  | 32.511243 | 5.869811 | 32.415015 |
| C | 32.400957 | 4.513250 | 37.986982 | C  | 31.612951 | 5.738072 | 46.482601 |
| C | 32.894204 | 3.275108 | 37.604598 | C  | 30.672308 | 4.845631 | 45.889837 |
| C | 32.929125 | 2.911376 | 36.243351 | C  | 29.599357 | 4.360557 | 46.596903 |
| C | 32.435888 | 3.765305 | 35.280334 | C  | 30.283144 | 4.915132 | 32.619946 |
| C | 31.873668 | 5.038867 | 35.617224 | C  | 31.372790 | 5.573398 | 33.197913 |
| C | 31.875599 | 5.420806 | 37.007530 | O  | 29.160703 | 4.635709 | 33.388716 |
| C | 31.310872 | 6.680507 | 37.360685 | O  | 33.432282 | 6.855291 | 43.553528 |
| C | 30.762090 | 7.503496 | 36.410563 | O  | 32.759079 | 4.749237 | 43.980323 |
| C | 30.752770 | 7.135318 | 35.039488 | C  | 32.988056 | 5.948764 | 44.309766 |
| C | 31.312508 | 5.928704 | 34.633553 | Cu | 48.378076 | 6.249313 | 41.563076 |
| O | 30.173551 | 8.073144 | 34.229086 | Cu | 48.030271 | 3.810421 | 42.058321 |
| O | 32.754005 | 5.997707 | 39.836022 | C  | 52.242278 | 4.464620 | 41.931334 |
| O | 32.244439 | 3.849431 | 40.232932 | C  | 52.828353 | 3.947597 | 43.079285 |
| C | 32.463642 | 4.830207 | 39.457103 | C  | 54.201353 | 3.732577 | 43.123183 |
| C | 28.361389 | 5.488723 | 42.296167 | C  | 54.987278 | 4.036581 | 42.018131 |
| C | 27.658029 | 6.294195 | 43.181098 | C  | 54.401203 | 4.554604 | 40.869180 |
| C | 42.160701 | 6.755857 | 41.956308 | C  | 53.028203 | 4.768624 | 40.826281 |
| C | 41.402597 | 5.886981 | 41.180528 | C  | 52.442128 | 5.287648 | 39.677330 |
| C | 42.002930 | 4.828628 | 40.468548 | C  | 53.229054 | 5.591652 | 38.571278 |
| C | 43.408563 | 4.644430 | 40.564644 | C  | 54.601054 | 5.377632 | 38.616177 |
| C | 28.352324 | 3.954698 | 40.310978 | C  | 55.187129 | 4.858609 | 39.764128 |

|   |           |          |           |    |           |          |           |
|---|-----------|----------|-----------|----|-----------|----------|-----------|
| O | 55.314970 | 5.617639 | 37.405129 | C  | 46.905324 | 5.251601 | 33.120489 |
| O | 50.321621 | 5.864246 | 41.710638 | O  | 44.865523 | 3.969327 | 33.246355 |
| O | 50.008401 | 3.678521 | 42.180243 | O  | 48.269408 | 6.541011 | 43.523442 |
| C | 50.769704 | 4.684382 | 41.948127 | O  | 47.929318 | 4.355151 | 43.969579 |
| C | 48.260021 | 4.218727 | 37.810204 | C  | 48.029922 | 5.581112 | 44.339391 |
| C | 49.063098 | 3.175131 | 37.316882 | C  | 9.830848  | 7.260896 | 57.522290 |
| C | 49.131607 | 2.911493 | 35.955735 | C  | 8.959816  | 6.502907 | 56.749315 |
| C | 48.397195 | 3.683217 | 35.062134 | C  | 9.429783  | 5.394908 | 56.054291 |
| C | 47.556745 | 4.722666 | 35.512092 | C  | 10.771783 | 5.042898 | 56.134241 |
| C | 47.470661 | 4.982074 | 36.906346 | C  | 10.370718 | 3.178911 | 54.666243 |
| C | 46.575115 | 5.970646 | 37.361476 | C  | 9.028718  | 3.528920 | 54.587293 |
| C | 45.829113 | 6.713634 | 36.455602 | C  | 8.558750  | 4.637919 | 55.281317 |
| C | 45.932779 | 6.498226 | 35.091642 | O  | 8.125684  | 2.792932 | 53.781319 |
| C | 46.800726 | 5.499610 | 34.594697 | Cu | 15.890937 | 6.152073 | 57.134072 |
| O | 45.170088 | 7.320668 | 34.264985 | Cu | 15.350561 | 3.735115 | 57.547093 |
| O | 48.435434 | 5.717102 | 39.652394 | C  | 19.606234 | 4.078938 | 57.423649 |
| O | 48.139515 | 3.524168 | 40.090219 | C  | 20.167493 | 3.307747 | 58.457181 |
| C | 48.279383 | 4.502127 | 39.270350 | C  | 21.524124 | 3.008142 | 58.467320 |
| C | 44.173061 | 5.516298 | 41.389230 | C  | 22.343913 | 3.465943 | 57.441033 |
| C | 43.532994 | 6.576172 | 42.055936 | C  | 21.820561 | 4.217087 | 56.371228 |
| C | 44.013812 | 3.622237 | 39.805885 | C  | 20.431480 | 4.513705 | 56.348562 |
| O | 46.395742 | 6.375343 | 41.440768 | C  | 19.899497 | 5.201674 | 55.237208 |
| O | 46.088763 | 4.181704 | 41.868088 | C  | 20.730187 | 5.620758 | 54.202826 |
| C | 45.638884 | 5.347380 | 41.575569 | C  | 22.099410 | 5.370500 | 54.243598 |
| C | 47.843017 | 5.913485 | 45.777117 | C  | 22.656475 | 4.659666 | 55.315535 |
| C | 48.792428 | 6.741465 | 46.404061 | O  | 22.917148 | 5.795124 | 53.202212 |
| C | 50.001697 | 7.120485 | 32.193710 | O  | 17.795326 | 5.620464 | 57.298377 |
| C | 48.953116 | 6.598301 | 32.943657 | O  | 17.317985 | 3.445430 | 57.663349 |
| C | 47.982924 | 5.763832 | 32.356216 | C  | 18.154166 | 4.401108 | 57.474831 |
| C | 46.719350 | 5.453300 | 46.517616 | C  | 15.683846 | 4.229100 | 53.319381 |
| C | 45.689298 | 4.702307 | 45.913208 | C  | 16.391935 | 3.114410 | 52.834791 |
| C | 44.605668 | 4.259136 | 46.665427 | C  | 16.444036 | 2.837277 | 51.476228 |
| C | 45.929582 | 4.460833 | 32.498558 | C  | 15.782664 | 3.663002 | 50.575130 |

|   |           |          |           |    |           |          |           |
|---|-----------|----------|-----------|----|-----------|----------|-----------|
| C | 15.039333 | 4.778335 | 51.013910 | C  | 14.418821 | 5.321964 | 48.615715 |
| C | 14.977329 | 5.059593 | 52.406149 | O  | 12.241413 | 4.293413 | 48.769064 |
| C | 14.180728 | 6.133981 | 52.849200 | O  | 15.753926 | 6.386484 | 59.109254 |
| C | 13.506683 | 6.932604 | 51.933839 | O  | 15.284370 | 4.211205 | 59.473953 |
| C | 13.584774 | 6.689727 | 50.572399 | C  | 15.446097 | 5.414616 | 59.891138 |
| C | 14.352394 | 5.606673 | 50.086962 | Cu | 31.486666 | 6.231051 | 57.150008 |
| O | 12.898779 | 7.568572 | 49.736670 | Cu | 30.971762 | 3.799755 | 57.513766 |
| O | 15.947136 | 5.673073 | 55.203853 | C  | 35.215240 | 4.161427 | 57.458876 |
| O | 15.447229 | 3.505098 | 55.575162 | C  | 35.755978 | 3.424542 | 58.528160 |
| C | 15.691024 | 4.486267 | 54.785269 | C  | 37.101005 | 3.079531 | 58.548821 |
| C | 11.644816 | 5.800887 | 56.909216 | C  | 37.928540 | 3.453997 | 57.496235 |
| C | 11.172849 | 6.908886 | 57.603240 | C  | 37.426456 | 4.175386 | 56.395705 |
| C | 25.327078 | 7.165495 | 57.563765 | C  | 36.049885 | 4.524886 | 56.366659 |
| C | 24.488938 | 6.341543 | 56.821684 | C  | 35.538488 | 5.192970 | 55.234484 |
| C | 24.997634 | 5.246696 | 56.093024 | C  | 36.378143 | 5.534032 | 54.178664 |
| C | 26.394647 | 4.986281 | 56.127767 | C  | 37.736543 | 5.228427 | 54.221676 |
| C | 11.243751 | 3.934900 | 55.440217 | C  | 38.272955 | 4.541309 | 55.319726 |
| C | 26.062171 | 3.149671 | 54.575063 | O  | 38.564307 | 5.579470 | 53.161406 |
| C | 24.693759 | 3.363296 | 54.568568 | O  | 33.401421 | 5.705562 | 57.299300 |
| C | 24.135793 | 4.415517 | 55.329449 | O  | 32.933126 | 3.525353 | 57.648006 |
| O | 23.923925 | 2.487298 | 53.806101 | C  | 33.764716 | 4.486566 | 57.478968 |
| O | 13.936151 | 6.437457 | 56.972400 | C  | 31.380760 | 4.380980 | 53.300285 |
| O | 13.440616 | 4.273490 | 57.366409 | C  | 32.151546 | 3.305174 | 52.823510 |
| C | 13.092576 | 5.477597 | 57.083334 | C  | 32.281881 | 3.068128 | 51.462762 |
| C | 15.283046 | 5.695821 | 61.352095 | C  | 31.635802 | 3.894182 | 50.551416 |
| C | 16.314087 | 6.385804 | 61.978046 | C  | 30.826813 | 4.965360 | 50.981399 |
| C | 17.714209 | 6.784473 | 47.651397 | C  | 30.691029 | 5.211773 | 52.374140 |
| C | 16.614453 | 6.403631 | 48.411549 | C  | 29.845125 | 6.255207 | 52.801117 |
| C | 15.546131 | 5.687492 | 47.838707 | C  | 29.184280 | 7.048851 | 51.868803 |
| C | 14.198081 | 5.242825 | 62.095148 | C  | 29.321910 | 6.826944 | 50.508516 |
| C | 13.166040 | 4.552842 | 61.469196 | C  | 30.147437 | 5.783872 | 50.047679 |
| C | 12.083075 | 4.099846 | 62.213249 | O  | 28.629590 | 7.678390 | 49.650777 |
| C | 13.352755 | 4.642887 | 48.009914 | O  | 31.545632 | 5.797600 | 55.211537 |

|    |           |          |           |   |           |          |           |
|----|-----------|----------|-----------|---|-----------|----------|-----------|
| O  | 31.094450 | 3.611454 | 55.536815 | C | 51.500923 | 3.947364 | 58.641689 |
| C  | 31.330960 | 4.612254 | 54.768816 | C | 52.873923 | 3.732339 | 58.685563 |
| C  | 27.238859 | 5.802148 | 56.931129 | C | 53.659830 | 4.036343 | 57.580498 |
| C  | 26.688122 | 6.899390 | 57.617963 | C | 53.073736 | 4.554373 | 56.431559 |
| C  | 40.930188 | 6.980598 | 57.641697 | C | 51.700736 | 4.768398 | 56.388685 |
| C  | 40.098676 | 6.176687 | 56.873636 | C | 51.114643 | 5.287428 | 55.239746 |
| C  | 40.608196 | 5.083612 | 56.141786 | C | 51.901549 | 5.591433 | 54.133681 |
| C  | 42.002423 | 4.808381 | 56.194302 | C | 53.273549 | 5.377407 | 54.178555 |
| C  | 26.912722 | 3.943681 | 55.334120 | C | 53.859642 | 4.858378 | 55.326493 |
| C  | 41.670250 | 2.978257 | 54.635155 | O | 53.987445 | 5.617415 | 52.967495 |
| C  | 40.305265 | 3.213789 | 54.601516 | O | 48.994031 | 5.859112 | 57.300907 |
| C  | 39.748497 | 4.271350 | 55.356045 | O | 48.672766 | 3.655533 | 57.670916 |
| O  | 39.536428 | 2.348147 | 53.826582 | C | 49.438759 | 4.672150 | 57.498439 |
| O  | 29.519373 | 6.500439 | 57.009755 | C | 46.976405 | 4.354199 | 53.320191 |
| O  | 29.061839 | 4.315213 | 57.329232 | C | 47.809487 | 3.339161 | 52.816432 |
| C  | 28.692455 | 5.522107 | 57.095369 | C | 47.859826 | 3.067710 | 51.456936 |
| C  | 30.903120 | 5.695641 | 61.351269 | C | 47.075499 | 3.801700 | 50.575347 |
| C  | 31.934175 | 6.385618 | 61.977205 | C | 46.213289 | 4.819654 | 51.034925 |
| C  | 33.380743 | 7.566876 | 47.717600 | C | 46.150914 | 5.090760 | 52.428275 |
| C  | 32.346015 | 7.023798 | 48.449251 | C | 45.240954 | 6.059717 | 52.894900 |
| C  | 31.414082 | 6.105834 | 47.863547 | C | 44.450633 | 6.768894 | 51.999240 |
| C  | 29.818167 | 5.242646 | 62.094340 | C | 44.526270 | 6.540006 | 50.635051 |
| C  | 28.786113 | 4.552669 | 61.468405 | C | 45.412509 | 5.562609 | 50.127262 |
| C  | 27.703159 | 4.099675 | 62.212476 | O | 43.725148 | 7.335733 | 49.818944 |
| C  | 29.407904 | 4.702159 | 47.959470 | O | 47.126635 | 5.800595 | 55.213524 |
| C  | 30.306966 | 5.554450 | 48.596751 | O | 46.814793 | 3.593791 | 55.565398 |
| O  | 28.345225 | 4.190699 | 48.641908 | C | 46.971718 | 4.599527 | 54.785634 |
| O  | 31.359405 | 6.423889 | 59.124702 | C | 42.843610 | 5.620610 | 57.003138 |
| O  | 30.889138 | 4.241855 | 59.448579 | C | 42.287920 | 6.707193 | 57.704547 |
| C  | 31.055058 | 5.437257 | 59.887529 | C | 42.519619 | 3.760248 | 55.408545 |
| Cu | 47.055601 | 6.252104 | 57.150191 | O | 45.084245 | 6.406028 | 57.023421 |
| Cu | 46.687134 | 3.796558 | 57.534986 | O | 44.742369 | 4.200949 | 57.352264 |
| C  | 50.914829 | 4.464394 | 57.493750 | C | 44.309262 | 5.389775 | 57.126301 |

|   |           |          |           |   |           |          |           |
|---|-----------|----------|-----------|---|-----------|----------|-----------|
| C | 46.523195 | 5.695406 | 61.350162 | H | 10.573047 | 6.786874 | 25.566268 |
| C | 47.554262 | 6.385378 | 61.976082 | H | 13.383775 | 2.323335 | 22.982404 |
| C | 48.669936 | 7.080524 | 47.744773 | H | 9.847477  | 3.169806 | 22.676771 |
| C | 47.593802 | 6.603552 | 48.483786 | H | 22.118752 | 2.869614 | 28.247310 |
| C | 46.608508 | 5.788274 | 47.893483 | H | 24.518066 | 2.332301 | 28.308675 |
| C | 45.438253 | 5.242413 | 62.093251 | H | 26.004815 | 3.098963 | 26.529412 |
| C | 44.406185 | 4.552442 | 61.467332 | H | 21.496872 | 5.253186 | 24.061004 |
| C | 43.323243 | 4.099449 | 62.211421 | H | 22.990816 | 5.956528 | 22.298788 |
| C | 44.520079 | 4.542606 | 48.026351 | H | 19.532554 | 2.329888 | 22.589875 |
| C | 45.509528 | 5.314006 | 48.651540 | H | 19.679466 | 1.794166 | 20.190511 |
| O | 43.434657 | 4.088387 | 48.766789 | H | 18.480535 | 3.170829 | 18.536728 |
| O | 46.924559 | 6.444489 | 59.124241 | H | 16.650717 | 6.144995 | 22.827083 |
| O | 46.573256 | 4.240688 | 59.462164 | H | 15.506774 | 7.500891 | 21.165215 |
| C | 46.676061 | 5.444947 | 59.891076 | H | 14.495640 | 7.508514 | 27.087169 |
| C | 16.262162 | 6.620790 | 63.347051 | H | 27.576521 | 8.009426 | 26.914446 |
| C | 15.179196 | 6.168795 | 64.090104 | H | 26.088038 | 6.499509 | 25.711312 |
| C | 14.147156 | 5.478812 | 63.465153 | H | 14.941499 | 3.633926 | 24.311686 |
| C | 12.031150 | 4.336833 | 63.582254 | H | 29.107495 | 2.085994 | 23.153302 |
| C | 13.063191 | 5.025817 | 64.207206 | H | 19.784506 | 6.905371 | 30.331298 |
| O | 10.943187 | 3.908837 | 64.361307 | H | 15.659808 | 4.584151 | 29.247356 |
| C | 31.882275 | 6.620600 | 63.346211 | H | 13.730909 | 3.908408 | 30.537550 |
| C | 30.799322 | 6.168606 | 64.089282 | H | 15.672144 | 6.861259 | 17.596350 |
| C | 29.767267 | 5.478629 | 63.464346 | H | 25.118308 | 6.106799 | 21.477506 |
| C | 27.651260 | 4.336658 | 63.581482 | H | 25.584261 | 2.452958 | 22.972851 |
| C | 28.683314 | 5.025635 | 64.206417 | H | 37.715029 | 2.954746 | 28.323107 |
| O | 26.563309 | 3.908663 | 64.360554 | H | 40.097049 | 2.354599 | 28.410993 |
| C | 47.502389 | 6.620356 | 63.345091 | H | 41.595829 | 2.968218 | 26.584743 |
| C | 46.419447 | 6.168363 | 64.088179 | H | 37.149715 | 5.158641 | 24.035325 |
| C | 45.387379 | 5.478391 | 63.463260 | H | 38.656877 | 5.710535 | 22.226325 |
| C | 43.271369 | 4.336426 | 63.580429 | H | 35.149560 | 2.328663 | 22.590600 |
| C | 44.303437 | 5.025398 | 64.205349 | H | 35.298571 | 1.793555 | 20.190385 |
| O | 42.183431 | 3.908432 | 64.359519 | H | 34.099980 | 3.170601 | 18.536509 |
| H | 12.119285 | 8.127201 | 26.935565 | H | 32.264388 | 6.143607 | 22.826049 |

|   |           |          |           |   |           |          |           |
|---|-----------|----------|-----------|---|-----------|----------|-----------|
| H | 31.124884 | 7.499551 | 21.165199 | H | 20.692599 | 2.499996 | 43.493067 |
| H | 29.984275 | 7.537658 | 27.055513 | H | 23.065436 | 1.867446 | 43.567013 |
| H | 43.118749 | 7.729762 | 27.039544 | H | 24.638201 | 2.760875 | 41.928679 |
| H | 41.671264 | 6.237229 | 25.775561 | H | 20.281302 | 5.240086 | 39.502123 |
| H | 30.617458 | 3.545754 | 24.364095 | H | 21.866112 | 6.074272 | 37.879456 |
| H | 44.772461 | 1.885919 | 23.203926 | H | 17.989931 | 2.239113 | 37.851888 |
| H | 35.620664 | 6.795682 | 30.261137 | H | 17.998644 | 1.801655 | 35.432764 |
| H | 31.381611 | 4.573145 | 29.436076 | H | 16.848519 | 3.307295 | 33.900005 |
| H | 29.460912 | 4.073308 | 30.819640 | H | 15.204840 | 6.176272 | 38.386112 |
| H | 31.292527 | 6.861345 | 17.596311 | H | 14.037777 | 7.627533 | 36.831459 |
| H | 40.785835 | 5.756352 | 21.396299 | H | 13.169655 | 7.507824 | 42.648372 |
| H | 41.252512 | 2.241812 | 22.949648 | H | 25.722438 | 7.095877 | 43.754322 |
| H | 53.552012 | 3.699277 | 28.381064 | H | 24.510252 | 6.010731 | 41.951253 |
| H | 55.987668 | 3.325945 | 28.455683 | H | 13.612105 | 3.635520 | 39.860889 |
| H | 57.384055 | 3.866280 | 26.497847 | H | 28.187165 | 2.674809 | 38.593219 |
| H | 52.703431 | 5.453208 | 24.015550 | H | 18.641579 | 6.749789 | 45.727437 |
| H | 54.081130 | 5.976275 | 22.116913 | H | 19.586663 | 7.447753 | 32.721747 |
| H | 50.777430 | 2.334662 | 22.589226 | H | 17.644033 | 6.707761 | 34.001881 |
| H | 50.920806 | 1.795194 | 20.189784 | H | 14.456386 | 4.454503 | 44.818670 |
| H | 49.720316 | 3.170916 | 18.535937 | H | 12.554338 | 3.848085 | 46.178404 |
| H | 47.863593 | 6.134730 | 22.823902 | H | 12.689007 | 3.750906 | 32.566674 |
| H | 46.741225 | 7.496811 | 21.164949 | H | 14.042770 | 7.295310 | 33.300404 |
| H | 45.532698 | 7.307649 | 27.172772 | H | 24.037612 | 6.320039 | 37.208439 |
| H | 46.250802 | 3.339034 | 24.465794 | H | 24.795737 | 2.846005 | 38.025942 |
| H | 50.944516 | 7.207905 | 30.277154 | H | 36.353457 | 2.359854 | 43.299583 |
| H | 47.062839 | 4.453540 | 29.313071 | H | 38.745844 | 1.597981 | 43.313215 |
| H | 45.237885 | 3.607230 | 30.650554 | H | 40.329894 | 2.438627 | 41.644028 |
| H | 46.912818 | 6.861624 | 17.595799 | H | 35.982281 | 5.139046 | 39.381878 |
| H | 56.056080 | 5.976926 | 21.104118 | H | 37.515748 | 5.867305 | 37.619347 |
| H | 10.790733 | 8.127451 | 42.499273 | H | 33.264597 | 2.591068 | 38.371162 |
| H | 9.244367  | 6.786863 | 41.130211 | H | 33.344565 | 1.941527 | 35.951135 |
| H | 12.055629 | 2.325628 | 38.543218 | H | 32.472726 | 3.440852 | 34.235176 |
| H | 8.519225  | 3.170850 | 38.239933 | H | 31.323341 | 6.988509 | 38.405253 |

|   |           |          |           |   |           |          |           |
|---|-----------|----------|-----------|---|-----------|----------|-----------|
| H | 30.318940 | 8.465942 | 36.680812 | H | 45.273877 | 7.103049 | 33.288669 |
| H | 28.191235 | 6.793211 | 43.993925 | H | 54.726131 | 5.971183 | 36.665528 |
| H | 41.679442 | 7.573057 | 42.484553 | H | 9.463348  | 8.127006 | 58.062993 |
| H | 40.336178 | 6.062003 | 41.128765 | H | 7.916914  | 6.786641 | 56.693639 |
| H | 29.429056 | 3.813474 | 40.400290 | H | 10.728123 | 2.325207 | 54.106956 |
| H | 43.709470 | 1.996654 | 38.439246 | H | 7.191270  | 3.169558 | 53.804778 |
| H | 34.375136 | 7.656900 | 45.778011 | H | 19.542027 | 2.948064 | 59.266204 |
| H | 35.549122 | 7.420529 | 32.636909 | H | 21.944494 | 2.419420 | 59.276724 |
| H | 33.615073 | 6.848990 | 34.010125 | H | 23.395492 | 3.215591 | 57.481362 |
| H | 30.810133 | 4.532759 | 44.859119 | H | 18.839984 | 5.414036 | 55.142854 |
| H | 28.887356 | 3.686643 | 46.105251 | H | 20.298463 | 6.148230 | 53.363014 |
| H | 28.468896 | 4.103782 | 32.881490 | H | 16.913168 | 2.459966 | 53.524179 |
| H | 30.112432 | 7.780458 | 33.306432 | H | 16.999911 | 1.976332 | 51.118152 |
| H | 39.625957 | 5.994698 | 36.945349 | H | 15.843946 | 3.411007 | 49.526069 |
| H | 40.174199 | 2.196549 | 38.122309 | H | 14.054072 | 6.367372 | 53.900161 |
| H | 52.223450 | 3.702331 | 43.945401 | H | 12.903359 | 7.760250 | 52.282080 |
| H | 54.659057 | 3.326348 | 44.019213 | H | 11.840423 | 7.509421 | 58.212278 |
| H | 56.055321 | 3.866127 | 42.061023 | H | 24.916885 | 8.010885 | 58.107171 |
| H | 51.374792 | 5.454626 | 39.580183 | H | 23.434618 | 6.578548 | 56.807632 |
| H | 52.752274 | 5.976114 | 37.680229 | H | 12.285021 | 3.636031 | 55.427623 |
| H | 49.651827 | 2.573195 | 37.999733 | H | 26.467671 | 2.347523 | 53.972952 |
| H | 49.762098 | 2.107462 | 35.589351 | H | 17.168091 | 6.739963 | 61.410673 |
| H | 48.477939 | 3.448173 | 34.010397 | H | 18.522624 | 7.346663 | 48.108486 |
| H | 46.424568 | 6.176575 | 38.415021 | H | 16.597916 | 6.685902 | 49.455557 |
| H | 45.148066 | 7.474207 | 36.813551 | H | 13.130661 | 4.374603 | 60.400649 |
| H | 44.109177 | 7.260461 | 42.668449 | H | 11.278047 | 3.574058 | 61.719337 |
| H | 45.086468 | 3.462416 | 39.799033 | H | 11.556584 | 3.781437 | 48.233372 |
| H | 49.636739 | 7.121773 | 45.840404 | H | 12.988331 | 7.336319 | 48.762256 |
| H | 50.732228 | 7.772919 | 32.661805 | H | 22.408809 | 6.314625 | 52.502438 |
| H | 48.895779 | 6.864321 | 33.990639 | H | 22.940997 | 2.698019 | 53.835498 |
| H | 45.697526 | 4.457550 | 44.856372 | H | 35.120981 | 3.118205 | 59.351568 |
| H | 43.829150 | 3.683312 | 46.180225 | H | 37.504711 | 2.514391 | 59.383103 |
| H | 44.246258 | 3.389665 | 32.699926 | H | 38.969288 | 3.163048 | 57.541646 |

|   |           |          |           |   |           |           |           |
|---|-----------|----------|-----------|---|-----------|-----------|-----------|
| H | 34.489184 | 5.453291 | 55.144055 | H | 48.405738 | 6.744655  | 61.408001 |
| H | 35.963473 | 6.047851 | 53.321940 | H | 49.412677 | 7.717529  | 48.214813 |
| H | 32.666995 | 2.654141 | 53.520706 | H | 47.527928 | 6.889954  | 49.524662 |
| H | 32.888465 | 2.239411 | 51.110517 | H | 44.381389 | 4.364423  | 60.399374 |
| H | 31.761695 | 3.675264 | 49.499295 | H | 42.519352 | 3.571630  | 61.717689 |
| H | 29.668840 | 6.464707 | 53.850775 | H | 42.804775 | 3.521851  | 48.218335 |
| H | 28.536675 | 7.848024 | 52.204680 | H | 43.803478 | 7.103566  | 48.843690 |
| H | 27.325200 | 7.541425 | 58.215621 | H | 53.398514 | 5.969997  | 52.227413 |
| H | 40.519117 | 7.822964 | 58.189166 | H | 17.068200 | 7.158084  | 63.836027 |
| H | 39.048500 | 6.428796 | 56.843717 | H | 15.148096 | 6.357229  | 65.155567 |
| H | 27.974724 | 3.734795 | 55.272437 | H | 10.263239 | 3.421563  | 63.797160 |
| H | 42.074540 | 2.170883 | 54.039362 | H | 32.687835 | 7.158729  | 63.835001 |
| H | 32.786486 | 6.743246 | 61.409436 | H | 30.767983 | 6.357274  | 65.154675 |
| H | 34.071529 | 8.270728 | 48.193018 | H | 25.882281 | 3.423333  | 63.795946 |
| H | 32.237005 | 7.312322 | 49.499775 | H | 48.307555 | 7.159071  | 63.833760 |
| H | 28.750205 | 4.373407 | 60.400223 | H | 46.387794 | 6.357265  | 65.153494 |
| H | 26.897947 | 3.574106 | 61.718541 | H | 41.501618 | 3.424510  | 63.794521 |
| H | 27.849609 | 3.587537 | 48.064026 | H | 54.922541 | 4.682751  | 55.325740 |
| H | 28.691161 | 7.395554 | 48.684166 | H | 56.250057 | 4.683068  | 39.763666 |
| H | 38.074596 | 6.092855 | 52.443788 | H | 57.578880 | 4.683407  | 24.200650 |
| H | 38.559295 | 2.585624 | 53.823298 | H | 32.654301 | 5.043328  | 18.026548 |
| H | 50.894958 | 3.700009 | 59.506335 | H | 17.034860 | 5.043593  | 18.026685 |
| H | 53.331565 | 3.325492 | 59.581282 | H | 10.176560 | 4.915311  | 24.089593 |
| H | 54.727841 | 3.865705 | 57.623105 | H | 8.847985  | 4.915557  | 39.653281 |
| H | 50.047620 | 5.459136 | 55.145109 | H | 7.520543  | 4.915521  | 55.216490 |
| H | 51.424884 | 5.976937 | 53.242966 | H | 12.998951 | 5.198960  | 65.269033 |
| H | 48.425407 | 2.756239 | 53.491781 | H | 28.618830 | 5.198896  | 65.268175 |
| H | 48.507967 | 2.281238 | 51.083255 | H | 44.238671 | 5.198790  | 65.267033 |
| H | 47.136189 | 3.553412 | 49.525485 | H | 48.273947 | 5.043132  | 18.026076 |
| H | 45.116268 | 6.277523 | 53.949650 | C | 31.864299 | 8.828983  | 41.151853 |
| H | 43.757786 | 7.514799 | 52.365255 | C | 31.514469 | 9.345404  | 42.580973 |
| H | 42.922458 | 7.346593 | 58.307787 | C | 31.943482 | 10.794149 | 42.818626 |
| H | 43.579153 | 3.535562 | 55.366265 | C | 31.544877 | 11.763638 | 41.696637 |



|                          |           |           |           |    |           |          |           |
|--------------------------|-----------|-----------|-----------|----|-----------|----------|-----------|
| C                        | 32.042958 | 11.255518 | 40.336768 | C  | 13.027000 | 3.179000 | 23.539000 |
| C                        | 31.491432 | 9.855045  | 40.055561 | C  | 11.685000 | 3.529000 | 23.460000 |
| O                        | 33.205156 | 8.524209  | 41.122537 | C  | 11.215000 | 4.638000 | 24.154000 |
| C                        | 29.446309 | 9.581147  | 44.077774 | O  | 10.782000 | 2.793000 | 22.654000 |
| C                        | 28.348747 | 10.443408 | 44.020468 | Cu | 18.542525 | 6.087424 | 26.013160 |
| C                        | 27.786758 | 10.925883 | 45.207370 | Cu | 17.946930 | 3.700374 | 26.529360 |
| C                        | 28.328490 | 10.553973 | 46.441576 | C  | 22.207587 | 3.946228 | 26.375600 |
| C                        | 29.429872 | 9.690979  | 46.486571 | C  | 22.751385 | 3.188691 | 27.428415 |
| C                        | 29.990930 | 9.193652  | 45.306457 | C  | 24.103363 | 2.870497 | 27.453332 |
| N                        | 30.027739 | 9.067519  | 42.837954 | C  | 24.935590 | 3.297281 | 26.423832 |
| H                        | 31.591981 | 11.150142 | 43.803074 | C  | 24.428604 | 4.032543 | 25.335015 |
| H                        | 32.034721 | 8.680430  | 43.282423 | C  | 23.043935 | 4.344279 | 25.295243 |
| H                        | 31.246504 | 7.924143  | 40.961719 | C  | 22.527664 | 5.011898 | 24.163730 |
| H                        | 31.953946 | 12.766449 | 41.916761 | C  | 23.371138 | 5.402262 | 23.128633 |
| H                        | 30.441621 | 11.886371 | 41.665996 | C  | 24.737332 | 5.141057 | 23.187567 |
| H                        | 31.752364 | 11.954051 | 39.530690 | C  | 25.277116 | 4.446109 | 24.278393 |
| H                        | 33.147391 | 11.209748 | 40.343994 | O  | 25.568939 | 5.538020 | 22.146272 |
| H                        | 30.384266 | 9.909744  | 39.958232 | O  | 20.432125 | 5.519217 | 26.189125 |
| H                        | 31.868013 | 9.459168  | 39.097226 | O  | 19.907562 | 3.373572 | 26.651305 |
| H                        | 33.045869 | 10.756168 | 42.875175 | C  | 20.763745 | 4.301028 | 26.416986 |
| H                        | 27.926553 | 10.736571 | 43.053124 | C  | 18.226927 | 4.022014 | 22.293999 |
| H                        | 26.923665 | 11.597011 | 45.161730 | C  | 18.992915 | 2.941012 | 21.873981 |
| H                        | 27.894090 | 10.935525 | 47.370593 | C  | 19.081890 | 2.638017 | 20.519979 |
| H                        | 29.862730 | 9.401017  | 47.448706 | C  | 18.404876 | 3.417023 | 19.587993 |
| H                        | 30.844070 | 8.511497  | 45.347110 | C  | 17.639888 | 4.497024 | 20.008011 |
| H                        | 29.991105 | 7.964320  | 42.820180 | C  | 17.550913 | 4.800019 | 21.362013 |
| H                        | 29.473902 | 9.406574  | 42.042783 | C  | 16.783924 | 5.881020 | 21.784030 |
|                          |           |           |           | C  | 16.107910 | 6.659026 | 20.850045 |
|                          |           |           |           | C  | 16.197885 | 6.355031 | 19.497042 |
|                          |           |           |           | C  | 16.963875 | 5.274030 | 19.076025 |
|                          |           |           |           | O  | 15.523872 | 7.185037 | 18.539057 |
|                          |           |           |           | O  | 18.565764 | 5.528932 | 24.110832 |
|                          |           |           |           | O  | 18.018572 | 3.389292 | 24.574345 |
| (S,S)-1-RC(QM(B3LYP)/MM) |           |           |           |    |           |          |           |
| C                        | 12.487000 | 7.261000  | 26.395000 |    |           |          |           |
| C                        | 11.616000 | 6.503000  | 25.622000 |    |           |          |           |
| C                        | 12.086000 | 5.395000  | 24.927000 |    |           |          |           |
| C                        | 13.428000 | 5.043000  | 25.007000 |    |           |          |           |

|    |           |          |           |   |           |          |           |
|----|-----------|----------|-----------|---|-----------|----------|-----------|
| C  | 18.263697 | 4.336317 | 23.745359 | C | 40.397067 | 4.970711 | 23.263137 |
| C  | 14.301000 | 5.801000 | 25.782000 | C | 40.913825 | 4.292969 | 24.376148 |
| C  | 13.829000 | 6.909000 | 26.476000 | O | 41.247308 | 5.332366 | 22.224046 |
| C  | 27.937190 | 6.993563 | 26.490419 | O | 36.006895 | 5.421845 | 26.221887 |
| C  | 27.101427 | 6.154871 | 25.761796 | O | 35.508359 | 3.260617 | 26.636880 |
| C  | 27.610822 | 5.038279 | 25.066950 | C | 36.354175 | 4.203630 | 26.434151 |
| C  | 29.004679 | 4.769584 | 25.124748 | C | 33.846854 | 4.021972 | 22.293718 |
| C  | 13.900000 | 3.935000 | 24.313000 | C | 34.612831 | 2.940969 | 21.873683 |
| C  | 28.677698 | 2.893924 | 23.617159 | C | 34.701781 | 2.637978 | 20.519678 |
| C  | 27.311401 | 3.116805 | 23.588879 | C | 34.024753 | 3.416989 | 19.587708 |
| C  | 26.753116 | 4.193211 | 24.314477 | C | 33.259776 | 4.496991 | 20.007741 |
| O  | 26.543771 | 2.226391 | 22.841015 | C | 33.170826 | 4.799983 | 21.361747 |
| O  | 16.595609 | 6.404230 | 25.846134 | C | 32.403848 | 5.880986 | 21.783781 |
| O  | 16.053890 | 4.266077 | 26.320505 | C | 31.727821 | 6.658997 | 20.849810 |
| C  | 15.735311 | 5.463150 | 25.983300 | C | 31.817771 | 6.355005 | 19.496805 |
| C  | 17.910418 | 5.830055 | 30.225920 | C | 32.583748 | 5.274002 | 19.075771 |
| C  | 18.902715 | 6.592910 | 30.868017 | O | 31.143743 | 7.185016 | 18.538835 |
| C  | 16.758389 | 5.424499 | 30.955846 | O | 34.110983 | 5.490745 | 24.164801 |
| C  | 15.682953 | 4.754539 | 30.334260 | O | 33.613424 | 3.327250 | 24.561719 |
| C  | 14.576240 | 4.355460 | 31.077316 | C | 33.845561 | 4.302268 | 23.759290 |
| O  | 18.429538 | 6.408568 | 27.972378 | C | 29.845153 | 5.600873 | 25.915947 |
| O  | 17.895526 | 4.264475 | 28.430331 | C | 29.295943 | 6.720240 | 26.566764 |
| C  | 18.095087 | 5.479543 | 28.792171 | C | 43.546946 | 6.888125 | 26.558517 |
| Cu | 34.100133 | 5.976820 | 26.091668 | C | 42.719570 | 6.020461 | 25.856779 |
| Cu | 33.546614 | 3.566634 | 26.534190 | C | 43.241276 | 4.898433 | 25.180190 |
| C  | 37.803292 | 3.862929 | 26.429490 | C | 44.640801 | 4.650101 | 25.234399 |
| C  | 38.324931 | 3.122834 | 27.506448 | C | 29.524542 | 3.702561 | 24.364422 |
| C  | 39.674339 | 2.798378 | 27.563245 | C | 44.324609 | 2.721546 | 23.794309 |
| C  | 40.526674 | 3.196115 | 26.539229 | C | 42.956903 | 2.939295 | 23.751326 |
| C  | 40.043830 | 3.912637 | 25.427694 | C | 42.389830 | 4.032634 | 24.443902 |
| C  | 38.662511 | 4.239728 | 25.360550 | O | 42.196784 | 2.028237 | 23.020970 |
| C  | 38.172134 | 4.899464 | 24.214468 | O | 32.134060 | 6.275423 | 25.977526 |
| C  | 39.035464 | 5.254366 | 23.182464 | O | 31.645361 | 4.109397 | 26.373232 |

|    |           |          |           |    |           |          |           |
|----|-----------|----------|-----------|----|-----------|----------|-----------|
| C  | 31.293683 | 5.312327 | 26.097844 | C  | 47.437655 | 6.354926 | 19.496287 |
| C  | 33.554884 | 5.567024 | 30.305518 | C  | 48.203620 | 5.273922 | 19.075235 |
| C  | 34.570560 | 6.296411 | 30.949639 | O  | 46.763613 | 7.184943 | 18.538331 |
| C  | 32.404246 | 5.170111 | 31.043070 | O  | 49.731043 | 5.590382 | 24.089256 |
| C  | 31.313934 | 4.521786 | 30.425322 | O  | 49.386591 | 3.424675 | 24.608054 |
| C  | 30.196436 | 4.158226 | 31.171285 | C  | 49.525514 | 4.367965 | 23.749491 |
| O  | 34.017509 | 6.223542 | 28.063320 | C  | 45.478044 | 5.528597 | 25.976309 |
| O  | 33.505539 | 4.061391 | 28.456874 | C  | 44.912155 | 6.648699 | 26.612686 |
| C  | 33.706687 | 5.264208 | 28.856958 | C  | 45.167398 | 3.560372 | 24.513770 |
| Cu | 49.694642 | 6.203953 | 25.981906 | O  | 47.714524 | 6.333944 | 25.883392 |
| Cu | 49.345050 | 3.786405 | 26.563918 | O  | 47.394838 | 4.166266 | 26.418001 |
| C  | 53.571003 | 4.464792 | 26.367939 | C  | 46.948694 | 5.326422 | 26.093908 |
| C  | 54.157058 | 3.947774 | 27.515902 | C  | 49.214742 | 5.993362 | 30.217302 |
| C  | 55.530059 | 3.732759 | 27.559826 | C  | 50.165080 | 6.836179 | 30.821640 |
| C  | 56.316002 | 4.036762 | 26.454787 | C  | 48.107805 | 5.528012 | 30.980337 |
| C  | 55.729946 | 4.554780 | 25.305823 | C  | 47.072432 | 4.767381 | 30.396756 |
| C  | 54.356947 | 4.768795 | 25.262899 | C  | 46.005060 | 4.319540 | 31.168926 |
| C  | 53.770890 | 5.287813 | 24.113936 | O  | 49.607360 | 6.564657 | 27.936186 |
| C  | 54.557834 | 5.591815 | 23.007897 | O  | 49.297661 | 4.390668 | 28.455556 |
| C  | 55.929834 | 5.377800 | 23.052821 | C  | 49.390487 | 5.627654 | 28.785760 |
| C  | 56.515889 | 4.858782 | 24.200784 | C  | 11.158286 | 7.260970 | 41.959133 |
| O  | 56.643771 | 5.617805 | 21.841785 | C  | 10.287269 | 6.502976 | 41.186145 |
| O  | 51.636817 | 5.836790 | 26.121624 | C  | 10.757253 | 5.394976 | 40.491133 |
| O  | 51.335289 | 3.660256 | 26.635779 | C  | 12.099253 | 5.042971 | 40.571108 |
| C  | 52.092879 | 4.666276 | 26.380236 | C  | 11.698221 | 3.178978 | 39.103109 |
| C  | 49.466779 | 4.021876 | 22.293156 | C  | 10.356221 | 3.528983 | 39.024134 |
| C  | 50.232745 | 2.940872 | 21.873104 | C  | 9.886237  | 4.637982 | 39.718146 |
| C  | 50.321669 | 2.637885 | 20.519096 | O  | 9.453204  | 2.792989 | 38.218147 |
| C  | 49.644627 | 3.416901 | 19.587140 | Cu | 17.231399 | 6.166552 | 41.485739 |
| C  | 48.879661 | 4.496905 | 20.007192 | Cu | 16.691357 | 3.765679 | 41.988006 |
| C  | 48.790737 | 4.799893 | 21.361200 | C  | 20.952388 | 4.102856 | 41.891278 |
| C  | 48.023772 | 5.880897 | 21.783251 | C  | 21.462784 | 3.354364 | 42.967701 |
| C  | 47.347731 | 6.658913 | 20.849295 | C  | 22.815061 | 3.048739 | 43.048749 |

|   |           |          |           |    |           |          |           |
|---|-----------|----------|-----------|----|-----------|----------|-----------|
| C | 23.683004 | 3.472808 | 42.049106 | C  | 26.042177 | 3.106299 | 39.433675 |
| C | 23.213693 | 4.193688 | 40.935534 | C  | 25.543464 | 4.289437 | 39.969795 |
| C | 21.829944 | 4.506660 | 40.845218 | O  | 25.319026 | 2.136668 | 38.797867 |
| C | 21.357324 | 5.175986 | 39.696982 | O  | 15.267287 | 6.445146 | 41.355231 |
| C | 22.239960 | 5.551924 | 38.687973 | O  | 14.778909 | 4.291535 | 41.809893 |
| C | 23.600366 | 5.272065 | 38.789226 | C  | 14.425147 | 5.487590 | 41.503913 |
| C | 24.095147 | 4.587248 | 39.903098 | C  | 16.686984 | 5.868967 | 45.711299 |
| O | 24.466599 | 5.645339 | 37.769667 | C  | 17.686746 | 6.644985 | 46.326572 |
| O | 19.140904 | 5.636473 | 41.636140 | C  | 18.798406 | 6.909384 | 32.216112 |
| O | 18.659084 | 3.481969 | 42.100479 | C  | 17.698955 | 6.473477 | 32.947084 |
| C | 19.498344 | 4.427562 | 41.877696 | C  | 16.668020 | 5.730766 | 32.339378 |
| C | 16.908281 | 4.148872 | 37.741033 | C  | 15.559869 | 5.451959 | 46.473802 |
| C | 17.622700 | 3.051148 | 37.229448 | C  | 14.480450 | 4.759980 | 45.885165 |
| C | 17.635583 | 2.782820 | 35.867521 | C  | 13.394246 | 4.359365 | 46.657372 |
| C | 16.933054 | 3.604115 | 34.992631 | C  | 14.509674 | 4.606561 | 32.445335 |
| C | 16.178519 | 4.699201 | 35.463213 | C  | 15.543181 | 5.302493 | 33.086801 |
| C | 16.146622 | 4.962483 | 36.858359 | O  | 13.399206 | 4.199389 | 33.176240 |
| C | 15.330316 | 6.007166 | 37.336737 | O  | 17.141042 | 6.469762 | 43.449477 |
| C | 14.606866 | 6.795275 | 36.450943 | O  | 16.644455 | 4.315452 | 43.898227 |
| C | 14.664000 | 6.578126 | 35.084409 | C  | 16.836203 | 5.529890 | 44.268447 |
| C | 15.456515 | 5.529230 | 34.565270 | Cu | 32.994522 | 6.219466 | 41.507627 |
| O | 13.936896 | 7.451104 | 34.277978 | Cu | 32.390679 | 3.780311 | 42.090976 |
| O | 17.246078 | 5.626724 | 39.576298 | C  | 36.590500 | 3.851776 | 41.775289 |
| O | 16.763861 | 3.468133 | 40.021338 | C  | 37.095649 | 2.974948 | 42.718345 |
| C | 16.979278 | 4.429422 | 39.198933 | C  | 38.467676 | 2.641372 | 42.716303 |
| C | 12.972270 | 5.800966 | 41.346096 | C  | 39.316417 | 3.174941 | 41.771601 |
| C | 12.500286 | 6.908965 | 42.040108 | C  | 38.841477 | 4.058511 | 40.748000 |
| C | 26.900087 | 7.354974 | 41.728805 | C  | 37.437770 | 4.386160 | 40.744947 |
| C | 26.014899 | 6.467734 | 41.152924 | C  | 36.939675 | 5.199489 | 39.686360 |
| C | 26.443317 | 5.213431 | 40.609427 | C  | 37.776614 | 5.689917 | 38.710856 |
| C | 27.843503 | 4.887575 | 40.716524 | C  | 39.170968 | 5.423743 | 38.742225 |
| C | 12.571237 | 3.934972 | 39.877096 | C  | 39.704793 | 4.613472 | 39.742346 |
| C | 27.426729 | 2.805556 | 39.524218 | O  | 39.984894 | 5.958971 | 37.790105 |

|   |           |          |           |    |           |          |           |
|---|-----------|----------|-----------|----|-----------|----------|-----------|
| O | 34.854871 | 5.467285 | 41.730900 | C  | 34.487514 | 6.593410 | 32.303307 |
| O | 34.313578 | 3.328315 | 42.149758 | C  | 33.382131 | 6.178705 | 33.037231 |
| C | 35.146237 | 4.241308 | 41.887507 | C  | 32.327735 | 5.470578 | 32.429634 |
| C | 32.541435 | 3.975282 | 37.867232 | C  | 31.175377 | 5.414638 | 46.471619 |
| C | 33.164207 | 2.818815 | 37.430282 | C  | 30.223871 | 4.512567 | 45.914700 |
| C | 33.159852 | 2.493976 | 36.057338 | C  | 29.202301 | 3.996958 | 46.675999 |
| C | 32.516631 | 3.307148 | 35.147765 | C  | 30.134071 | 4.423031 | 32.536510 |
| C | 31.815393 | 4.490086 | 35.551511 | C  | 31.190949 | 5.080247 | 33.174034 |
| C | 31.830779 | 4.820840 | 36.952965 | O  | 29.002139 | 4.075563 | 33.262358 |
| C | 31.086498 | 5.955123 | 37.389930 | O  | 32.823854 | 6.523406 | 43.469065 |
| C | 30.370229 | 6.716017 | 36.502026 | O  | 32.373804 | 4.377363 | 43.966627 |
| C | 30.375037 | 6.419002 | 35.113634 | C  | 32.490323 | 5.602707 | 44.271702 |
| C | 31.100274 | 5.334863 | 34.629210 | Cu | 48.434751 | 6.370174 | 41.599675 |
| O | 29.639722 | 7.298741 | 34.370508 | Cu | 48.009634 | 3.939838 | 42.077253 |
| O | 32.999901 | 5.489089 | 39.633818 | C  | 52.242278 | 4.464620 | 41.931334 |
| O | 32.381212 | 3.388578 | 40.149440 | C  | 52.828353 | 3.947597 | 43.079285 |
| C | 32.641699 | 4.313673 | 39.324323 | C  | 54.201353 | 3.732577 | 43.123183 |
| C | 28.734854 | 5.821996 | 41.343923 | C  | 54.987278 | 4.036581 | 42.018131 |
| C | 28.272153 | 7.041211 | 41.812235 | C  | 54.401203 | 4.554604 | 40.869180 |
| C | 42.248343 | 7.066973 | 42.164670 | C  | 53.028203 | 4.768624 | 40.826281 |
| C | 41.441602 | 6.253359 | 41.377303 | C  | 52.442128 | 5.287648 | 39.677330 |
| C | 41.990424 | 5.211121 | 40.602837 | C  | 53.229054 | 5.591652 | 38.571278 |
| C | 43.392034 | 4.981610 | 40.650791 | C  | 54.601054 | 5.377632 | 38.616177 |
| C | 28.297305 | 3.660642 | 40.149083 | C  | 55.187129 | 4.858609 | 39.764128 |
| C | 43.124820 | 3.193711 | 39.030802 | O  | 55.314970 | 5.617639 | 37.405129 |
| C | 41.754452 | 3.390260 | 38.995259 | O  | 50.363683 | 5.918653 | 41.730433 |
| C | 41.168510 | 4.403778 | 39.779395 | O  | 49.984877 | 3.741507 | 42.191240 |
| O | 41.013763 | 2.539926 | 38.178932 | C  | 50.776134 | 4.724471 | 41.959754 |
| O | 31.011957 | 6.460416 | 41.317562 | C  | 48.261462 | 4.361747 | 37.833161 |
| O | 30.507012 | 4.358936 | 41.933061 | C  | 49.041756 | 3.297424 | 37.347131 |
| C | 30.190626 | 5.522139 | 41.537856 | C  | 49.110771 | 3.026893 | 35.987613 |
| C | 32.237868 | 5.996596 | 45.697938 | C  | 48.397350 | 3.810684 | 35.087989 |
| C | 33.073815 | 6.949538 | 46.255267 | C  | 47.580705 | 4.872363 | 35.529842 |

|   |           |          |           |    |           |          |           |
|---|-----------|----------|-----------|----|-----------|----------|-----------|
| C | 47.497917 | 5.142814 | 36.922466 | C  | 10.370718 | 3.178911 | 54.666243 |
| C | 46.630236 | 6.159537 | 37.368886 | C  | 9.028718  | 3.528920 | 54.587293 |
| C | 45.906924 | 6.916600 | 36.456050 | C  | 8.558750  | 4.637919 | 55.281317 |
| C | 46.004839 | 6.686693 | 35.093808 | O  | 8.125684  | 2.792932 | 53.781319 |
| C | 46.844300 | 5.659933 | 34.605734 | Cu | 15.892968 | 6.142729 | 57.136149 |
| O | 45.264760 | 7.522049 | 34.259602 | Cu | 15.342553 | 3.727918 | 57.550881 |
| O | 48.463039 | 5.850377 | 39.683049 | C  | 19.596182 | 4.049004 | 57.445764 |
| O | 48.105744 | 3.664188 | 40.108258 | C  | 20.145903 | 3.287579 | 58.492711 |
| C | 48.275873 | 4.641797 | 39.294099 | C  | 21.498340 | 2.970906 | 58.510095 |
| C | 44.205083 | 5.794096 | 41.487390 | C  | 22.324928 | 3.401685 | 57.477844 |
| C | 43.617248 | 6.844763 | 42.213800 | C  | 21.812541 | 4.143445 | 56.396012 |
| C | 43.945926 | 3.972842 | 39.837735 | C  | 20.427916 | 4.458080 | 56.366507 |
| O | 46.458145 | 6.567473 | 41.496548 | C  | 19.906554 | 5.138157 | 55.245284 |
| O | 46.079300 | 4.379945 | 41.898215 | C  | 20.744089 | 5.529853 | 54.205583 |
| C | 45.667207 | 5.566326 | 41.632886 | C  | 22.109711 | 5.261531 | 54.252321 |
| C | 47.889530 | 6.016244 | 45.810684 | C  | 22.655385 | 4.560008 | 55.335996 |
| C | 48.867773 | 6.795704 | 46.454677 | O  | 22.935391 | 5.660704 | 53.207340 |
| C | 50.064492 | 7.177783 | 32.164336 | O  | 17.795438 | 5.601565 | 57.302284 |
| C | 49.009250 | 6.689166 | 32.927129 | O  | 17.305976 | 3.429565 | 57.671001 |
| C | 48.019271 | 5.865932 | 32.357177 | C  | 18.147054 | 4.380800 | 57.485050 |
| C | 46.741078 | 5.595430 | 46.536381 | C  | 15.672654 | 4.225733 | 53.323127 |
| C | 45.682876 | 4.900998 | 45.913051 | C  | 16.391036 | 3.122388 | 52.828663 |
| C | 44.573872 | 4.497217 | 46.650167 | C  | 16.444395 | 2.858081 | 51.467413 |
| C | 45.939968 | 4.609255 | 32.529460 | C  | 15.773020 | 3.684956 | 50.574280 |
| C | 46.934819 | 5.389383 | 33.134332 | C  | 15.016200 | 4.786675 | 51.024334 |
| O | 44.869592 | 4.151911 | 33.289913 | C  | 14.954457 | 5.055527 | 52.418725 |
| O | 48.346934 | 6.648317 | 43.563695 | C  | 14.148597 | 6.118505 | 52.872881 |
| O | 47.930528 | 4.471968 | 43.991887 | C  | 13.461705 | 6.916044 | 51.966156 |
| C | 48.073018 | 5.690565 | 44.371478 | C  | 13.537357 | 6.683944 | 50.602706 |
| C | 9.830848  | 7.260896 | 57.522290 | C  | 14.317024 | 5.614680 | 50.106610 |
| C | 8.959816  | 6.502907 | 56.749315 | O  | 12.835979 | 7.558850 | 49.775674 |
| C | 9.429783  | 5.394908 | 56.054291 | O  | 15.946431 | 5.663121 | 55.207716 |
| C | 10.771783 | 5.042898 | 56.134241 | O  | 15.439279 | 3.496465 | 55.578357 |

|    |           |          |           |   |           |          |           |
|----|-----------|----------|-----------|---|-----------|----------|-----------|
| C  | 15.685475 | 4.477769 | 54.789083 | C | 37.104482 | 3.026058 | 58.551886 |
| C  | 11.644816 | 5.800887 | 56.909216 | C | 37.932213 | 3.401308 | 57.499829 |
| C  | 11.172849 | 6.908886 | 57.603240 | C | 37.427568 | 4.111385 | 56.393393 |
| C  | 25.320181 | 7.087302 | 57.562744 | C | 36.047764 | 4.449190 | 56.357888 |
| C  | 24.483751 | 6.256044 | 56.827137 | C | 35.533913 | 5.101845 | 55.217932 |
| C  | 24.992564 | 5.147505 | 56.119041 | C | 36.373790 | 5.439351 | 54.160829 |
| C  | 26.387719 | 4.881493 | 56.167094 | C | 37.734970 | 5.146970 | 54.210836 |
| C  | 11.243751 | 3.934900 | 55.440217 | C | 38.274666 | 4.476021 | 55.317243 |
| C  | 26.056642 | 3.017635 | 54.646762 | O | 38.562265 | 5.493454 | 53.148631 |
| C  | 24.689612 | 3.238514 | 54.626318 | O | 33.392995 | 5.623980 | 57.270045 |
| C  | 24.132462 | 4.307892 | 55.363261 | O | 32.932760 | 3.452037 | 57.675122 |
| O  | 23.919808 | 2.351463 | 53.876738 | C | 33.761011 | 4.410341 | 57.473839 |
| O  | 13.938001 | 6.433997 | 56.974302 | C | 31.292567 | 4.203845 | 53.328307 |
| O  | 13.435895 | 4.271610 | 57.369071 | C | 32.079017 | 3.141263 | 52.848250 |
| C  | 13.091677 | 5.476171 | 57.084962 | C | 32.156501 | 2.867839 | 51.489972 |
| C  | 15.283046 | 5.695821 | 61.352095 | C | 31.441364 | 3.643642 | 50.585450 |
| C  | 16.314087 | 6.385804 | 61.978046 | C | 30.614551 | 4.698511 | 51.021314 |
| C  | 17.613355 | 6.966731 | 47.675559 | C | 30.532137 | 4.980699 | 52.411779 |
| C  | 16.535210 | 6.527390 | 48.435102 | C | 29.667339 | 6.003458 | 52.849190 |
| C  | 15.497084 | 5.772345 | 47.856889 | C | 28.936100 | 6.744595 | 51.927235 |
| C  | 14.198081 | 5.242825 | 62.095148 | C | 29.027887 | 6.495379 | 50.567630 |
| C  | 13.166040 | 4.552842 | 61.469196 | C | 29.866965 | 5.466761 | 50.096620 |
| C  | 12.083075 | 4.099846 | 62.213249 | O | 28.280591 | 7.310135 | 49.721557 |
| C  | 13.351168 | 4.632851 | 48.022347 | O | 31.505664 | 5.664424 | 55.203080 |
| C  | 14.389869 | 5.348824 | 48.632746 | O | 31.066840 | 3.484791 | 55.585952 |
| O  | 12.258733 | 4.227055 | 48.780878 | C | 31.284403 | 4.468561 | 54.791596 |
| O  | 15.757751 | 6.380853 | 59.109660 | C | 27.230054 | 5.707698 | 56.961138 |
| O  | 15.278905 | 4.207925 | 59.476736 | C | 26.679665 | 6.816680 | 57.629211 |
| C  | 15.446069 | 5.411329 | 59.892318 | C | 40.912422 | 6.963378 | 57.613821 |
| Cu | 31.475437 | 6.143683 | 57.134090 | C | 40.087238 | 6.142537 | 56.856625 |
| Cu | 30.968605 | 3.720256 | 57.557545 | C | 40.606208 | 5.047408 | 56.135021 |
| C  | 35.213165 | 4.088514 | 57.451735 | C | 42.003667 | 4.787229 | 56.187592 |
| C  | 35.757187 | 3.361422 | 58.526081 | C | 26.906067 | 3.822600 | 55.395190 |

|    |           |          |           |   |           |          |           |
|----|-----------|----------|-----------|---|-----------|----------|-----------|
| C  | 41.687121 | 2.939554 | 54.645593 | O | 53.987445 | 5.617415 | 52.967495 |
| C  | 40.319453 | 3.159325 | 54.613949 | O | 48.993600 | 5.862758 | 57.303999 |
| C  | 39.752963 | 4.218560 | 55.358905 | O | 48.671129 | 3.657919 | 57.664318 |
| O  | 39.558297 | 2.277498 | 53.849667 | C | 49.438074 | 4.674550 | 57.497699 |
| O  | 29.508034 | 6.409143 | 57.012815 | C | 46.947820 | 4.386387 | 53.312802 |
| O  | 29.055990 | 4.230714 | 57.382881 | C | 47.750282 | 3.355876 | 52.791065 |
| C  | 28.683562 | 5.432195 | 57.125908 | C | 47.789834 | 3.104445 | 51.427243 |
| C  | 30.903120 | 5.695641 | 61.351269 | C | 47.026989 | 3.875836 | 50.558733 |
| C  | 31.934175 | 6.385618 | 61.977205 | C | 46.195810 | 4.911382 | 51.035791 |
| C  | 32.934022 | 7.314822 | 47.611710 | C | 46.140038 | 5.158672 | 52.433875 |
| C  | 31.951866 | 6.744489 | 48.391611 | C | 45.253475 | 6.141366 | 52.917300 |
| C  | 31.028412 | 5.787784 | 47.857184 | C | 44.486087 | 6.890165 | 52.034266 |
| C  | 29.818167 | 5.242646 | 62.094340 | C | 44.560721 | 6.688142 | 50.666025 |
| C  | 28.786113 | 4.552669 | 61.468405 | C | 45.419644 | 5.695538 | 50.140848 |
| C  | 27.703159 | 4.099675 | 62.212476 | O | 43.787077 | 7.524832 | 49.864477 |
| C  | 29.077385 | 4.323054 | 48.051616 | O | 47.124597 | 5.814774 | 55.216127 |
| C  | 29.975847 | 5.207607 | 48.644336 | O | 46.808865 | 3.607037 | 55.556318 |
| O  | 28.074895 | 3.770369 | 48.789806 | C | 46.961208 | 4.617631 | 54.781285 |
| O  | 31.369050 | 6.380025 | 59.108501 | C | 42.838581 | 5.614806 | 56.988591 |
| O  | 30.903776 | 4.204736 | 59.480976 | C | 42.273123 | 6.703907 | 57.678068 |
| C  | 31.065500 | 5.409863 | 59.893188 | C | 42.529956 | 3.738087 | 55.409140 |
| Cu | 47.053443 | 6.257932 | 57.152866 | O | 45.079327 | 6.409849 | 57.023749 |
| Cu | 46.685613 | 3.801409 | 57.529222 | O | 44.741206 | 4.203887 | 57.348364 |
| C  | 50.914829 | 4.464394 | 57.493750 | C | 44.305698 | 5.391321 | 57.121131 |
| C  | 51.500923 | 3.947364 | 58.641689 | C | 46.523195 | 5.695406 | 61.350162 |
| C  | 52.873923 | 3.732339 | 58.685563 | C | 47.554262 | 6.385378 | 61.976082 |
| C  | 53.659830 | 4.036343 | 57.580498 | C | 48.749249 | 7.121816 | 47.799068 |
| C  | 53.073736 | 4.554373 | 56.431559 | C | 47.649461 | 6.678715 | 48.524617 |
| C  | 51.700736 | 4.768398 | 56.388685 | C | 46.635249 | 5.913480 | 47.916435 |
| C  | 51.114643 | 5.287428 | 55.239746 | C | 45.438253 | 5.242413 | 62.093251 |
| C  | 51.901549 | 5.591433 | 54.133681 | C | 44.406185 | 4.552442 | 61.467332 |
| C  | 53.273549 | 5.377407 | 54.178555 | C | 43.323243 | 4.099449 | 62.211421 |
| C  | 53.859642 | 4.858378 | 55.326493 | C | 44.492293 | 4.760308 | 48.015393 |



|   |           |          |           |   |           |          |           |
|---|-----------|----------|-----------|---|-----------|----------|-----------|
| C | 45.512655 | 5.473139 | 48.660510 | H | 19.679284 | 1.794038 | 20.190523 |
| O | 43.380686 | 4.346379 | 48.740455 | H | 18.480436 | 3.170780 | 18.536728 |
| O | 46.922251 | 6.446501 | 59.125910 | H | 16.651305 | 6.145384 | 22.827088 |
| O | 46.573344 | 4.241666 | 59.459160 | H | 15.506883 | 7.500937 | 21.165313 |
| C | 46.675317 | 5.445521 | 59.890714 | H | 14.495570 | 7.508372 | 27.087405 |
| C | 16.262162 | 6.620790 | 63.347051 | H | 27.526867 | 7.857178 | 27.004363 |
| C | 15.179196 | 6.168795 | 64.090104 | H | 26.048886 | 6.398352 | 25.729606 |
| C | 14.147156 | 5.478812 | 63.465153 | H | 14.941481 | 3.633900 | 24.311559 |
| C | 12.031150 | 4.336833 | 63.582254 | H | 29.084381 | 2.072655 | 23.042307 |
| C | 13.063191 | 5.025817 | 64.207206 | H | 19.770564 | 6.931522 | 30.313506 |
| O | 10.943187 | 3.908837 | 64.361307 | H | 15.672276 | 4.542099 | 29.270554 |
| C | 31.882275 | 6.620600 | 63.346211 | H | 13.766344 | 3.840225 | 30.578837 |
| C | 30.799322 | 6.168606 | 64.089282 | H | 15.671825 | 6.861031 | 17.596382 |
| C | 29.767267 | 5.478629 | 63.464346 | H | 25.073412 | 6.055815 | 21.436022 |
| C | 27.651260 | 4.336658 | 63.581482 | H | 25.562179 | 2.445292 | 22.853354 |
| C | 28.683314 | 5.025635 | 64.206417 | H | 37.673540 | 2.805679 | 28.312928 |
| O | 26.563309 | 3.908663 | 64.360554 | H | 40.063209 | 2.236115 | 28.406677 |
| C | 47.502389 | 6.620356 | 63.345091 | H | 41.571513 | 2.926503 | 26.615269 |
| C | 46.419447 | 6.168363 | 64.088179 | H | 37.120828 | 5.139429 | 24.093373 |
| C | 45.387379 | 5.478391 | 63.463260 | H | 38.635873 | 5.760630 | 22.314188 |
| C | 43.271369 | 4.336426 | 63.580429 | H | 35.145978 | 2.324667 | 22.589977 |
| C | 44.303437 | 5.025398 | 64.205349 | H | 35.297511 | 1.792784 | 20.190416 |
| O | 42.183431 | 3.908432 | 64.359519 | H | 34.099656 | 3.170375 | 18.536522 |
| H | 12.119253 | 8.127124 | 26.935677 | H | 32.269359 | 6.145498 | 22.826255 |
| H | 10.573026 | 6.786833 | 25.566349 | H | 31.125759 | 7.500166 | 21.165188 |
| H | 13.383863 | 2.323359 | 22.982438 | H | 29.932039 | 7.375704 | 27.150552 |
| H | 9.847426  | 3.169681 | 22.677075 | H | 43.126757 | 7.753836 | 27.060882 |
| H | 22.116529 | 2.856361 | 28.241905 | H | 41.662704 | 6.244789 | 25.833650 |
| H | 24.510574 | 2.293495 | 28.277794 | H | 30.585317 | 3.484207 | 24.319988 |
| H | 25.983641 | 3.035051 | 26.476981 | H | 44.736162 | 1.883112 | 23.248523 |
| H | 21.470970 | 5.230437 | 24.053630 | H | 35.438280 | 6.628388 | 30.390605 |
| H | 22.951976 | 5.917118 | 22.274705 | H | 31.298914 | 4.302488 | 29.362538 |
| H | 19.532034 | 2.329525 | 22.589957 | H | 29.370620 | 3.667145 | 30.673828 |

|   |           |          |           |   |           |          |           |
|---|-----------|----------|-----------|---|-----------|----------|-----------|
| H | 31.291862 | 6.860908 | 17.596336 | H | 13.986208 | 7.597860 | 36.826445 |
| H | 40.768116 | 5.841706 | 21.496737 | H | 13.169153 | 7.512246 | 42.644872 |
| H | 41.214881 | 2.246637 | 23.019625 | H | 26.535941 | 8.307953 | 42.125705 |
| H | 53.552015 | 3.700006 | 28.381241 | H | 24.957754 | 6.749316 | 41.109118 |
| H | 55.987716 | 3.326086 | 28.455723 | H | 13.611953 | 3.633479 | 39.869933 |
| H | 57.384072 | 3.866312 | 26.497839 | H | 27.774916 | 1.870469 | 39.077675 |
| H | 52.703478 | 5.452004 | 24.014268 | H | 18.536379 | 6.992041 | 45.749462 |
| H | 54.081085 | 5.975911 | 22.116779 | H | 19.576824 | 7.491397 | 32.699687 |
| H | 50.777546 | 2.334972 | 22.589378 | H | 17.651943 | 6.735132 | 33.995525 |
| H | 50.920908 | 1.795271 | 20.189760 | H | 14.450981 | 4.530560 | 44.825409 |
| H | 49.720393 | 3.170972 | 18.535918 | H | 12.580306 | 3.827582 | 46.183521 |
| H | 47.862963 | 6.134710 | 22.823776 | H | 12.740934 | 3.679166 | 32.615709 |
| H | 46.741246 | 7.496798 | 21.165012 | H | 14.001003 | 7.228646 | 33.299357 |
| H | 45.543486 | 7.338724 | 27.160980 | H | 24.002767 | 6.167109 | 37.040663 |
| H | 46.229445 | 3.345445 | 24.482426 | H | 24.380539 | 2.365390 | 38.709240 |
| H | 50.996742 | 7.219392 | 30.241412 | H | 36.426573 | 2.563258 | 43.477954 |
| H | 47.063337 | 4.519527 | 29.340673 | H | 38.860548 | 1.962504 | 43.479516 |
| H | 45.224155 | 3.736904 | 30.699256 | H | 40.376367 | 2.904538 | 41.806392 |
| H | 46.913303 | 6.861969 | 17.595738 | H | 35.875446 | 5.432214 | 39.636612 |
| H | 56.056057 | 5.977090 | 21.104215 | H | 37.366695 | 6.299851 | 37.896362 |
| H | 10.790991 | 8.128206 | 42.498255 | H | 33.668812 | 2.172336 | 38.153010 |
| H | 9.244458  | 6.787119 | 41.129912 | H | 33.669557 | 1.588495 | 35.712817 |
| H | 12.055514 | 2.324702 | 38.544638 | H | 32.535349 | 3.016220 | 34.092409 |
| H | 8.519386  | 3.171265 | 38.239647 | H | 31.070843 | 6.216276 | 38.448338 |
| H | 20.800329 | 3.018400 | 43.757590 | H | 29.777375 | 7.570886 | 36.837890 |
| H | 23.194473 | 2.481254 | 43.893057 | H | 28.977032 | 7.743271 | 42.264229 |
| H | 24.731420 | 3.220481 | 42.147182 | H | 41.809222 | 7.871952 | 42.744889 |
| H | 20.306085 | 5.404848 | 39.554136 | H | 40.378918 | 6.455086 | 41.370935 |
| H | 21.853721 | 6.064944 | 37.817321 | H | 29.352795 | 3.397455 | 40.208059 |
| H | 18.182969 | 2.407940 | 37.898247 | H | 43.557522 | 2.418457 | 38.411873 |
| H | 18.197162 | 1.935951 | 35.485696 | H | 33.854457 | 7.403863 | 45.640937 |
| H | 16.968357 | 3.363320 | 33.939621 | H | 35.284303 | 7.149558 | 32.787520 |
| H | 15.225666 | 6.223765 | 38.393759 | H | 33.349334 | 6.432332 | 34.089034 |

|   |           |          |           |   |           |          |           |
|---|-----------|----------|-----------|---|-----------|----------|-----------|
| H | 30.297615 | 4.230813 | 44.864961 | H | 18.850472 | 5.366092 | 55.148176 |
| H | 28.475186 | 3.314289 | 46.219559 | H | 20.321161 | 6.051356 | 53.357603 |
| H | 28.335224 | 3.555107 | 32.711086 | H | 16.921333 | 2.468861 | 53.511956 |
| H | 29.546103 | 7.019891 | 33.446424 | H | 17.010047 | 2.007094 | 51.101073 |
| H | 39.461417 | 6.499516 | 37.176557 | H | 15.836984 | 3.444838 | 49.522531 |
| H | 40.023384 | 2.729091 | 38.200282 | H | 14.025111 | 6.343673 | 53.926082 |
| H | 52.224080 | 3.708504 | 43.947535 | H | 12.850837 | 7.734513 | 52.322852 |
| H | 54.659283 | 3.327770 | 44.019752 | H | 11.840446 | 7.509302 | 58.212385 |
| H | 56.055390 | 3.866515 | 42.061173 | H | 24.910093 | 7.943110 | 58.089745 |
| H | 51.374553 | 5.453432 | 39.580228 | H | 23.430832 | 6.498245 | 56.801671 |
| H | 52.752212 | 5.975828 | 37.680147 | H | 12.285070 | 3.636221 | 55.427159 |
| H | 49.611936 | 2.683215 | 38.034856 | H | 26.462254 | 2.202078 | 54.063123 |
| H | 49.724158 | 2.206965 | 35.627370 | H | 17.168253 | 6.739582 | 61.410662 |
| H | 48.476694 | 3.568412 | 34.037793 | H | 18.398230 | 7.558203 | 48.136903 |
| H | 46.485296 | 6.378077 | 38.420710 | H | 16.510933 | 6.795042 | 49.482905 |
| H | 45.248357 | 7.699745 | 36.807142 | H | 13.129062 | 4.375840 | 60.400594 |
| H | 44.231295 | 7.484799 | 42.837283 | H | 11.277864 | 3.574436 | 61.719240 |
| H | 45.012597 | 3.777796 | 39.801904 | H | 11.594695 | 3.692601 | 48.241063 |
| H | 49.731343 | 7.147496 | 45.901867 | H | 12.922057 | 7.332259 | 48.799517 |
| H | 50.810497 | 7.822623 | 32.618374 | H | 22.437730 | 6.183663 | 52.502420 |
| H | 48.962619 | 6.972696 | 33.970034 | H | 22.939115 | 2.574047 | 53.888482 |
| H | 45.688422 | 4.672189 | 44.852688 | H | 35.122865 | 3.056421 | 59.350540 |
| H | 43.774418 | 3.967202 | 46.150114 | H | 37.509963 | 2.468823 | 59.390549 |
| H | 44.237194 | 3.575122 | 32.755677 | H | 38.975141 | 3.119132 | 57.549897 |
| H | 45.369522 | 7.297945 | 33.284726 | H | 34.482340 | 5.351056 | 55.121600 |
| H | 54.726293 | 5.972250 | 36.665931 | H | 35.957009 | 5.939886 | 53.297223 |
| H | 9.463375  | 8.127043 | 58.062944 | H | 32.644235 | 2.527409 | 53.540424 |
| H | 7.916937  | 6.786694 | 56.693556 | H | 32.774363 | 2.049008 | 51.134542 |
| H | 10.728282 | 2.325385 | 54.106799 | H | 31.527202 | 3.398299 | 49.535196 |
| H | 7.191610  | 3.170437 | 53.803768 | H | 29.533699 | 6.238886 | 53.899806 |
| H | 19.514272 | 2.947311 | 59.305320 | H | 28.276721 | 7.531209 | 52.270251 |
| H | 21.909777 | 2.389011 | 59.328955 | H | 27.316054 | 7.466561 | 58.219023 |
| H | 23.372938 | 3.137592 | 57.523120 | H | 40.493666 | 7.807325 | 58.152977 |

|   |           |          |           |   |           |           |           |
|---|-----------|----------|-----------|---|-----------|-----------|-----------|
| H | 39.034301 | 6.383091 | 56.826524 | H | 15.148102 | 6.357249  | 65.155560 |
| H | 27.967243 | 3.607761 | 55.343162 | H | 10.263285 | 3.421738  | 63.796958 |
| H | 42.098861 | 2.131549 | 54.055780 | H | 32.688262 | 7.157973  | 63.835111 |
| H | 32.788121 | 6.739517 | 61.409616 | H | 30.768063 | 6.357106  | 65.154700 |
| H | 33.614819 | 8.054385 | 48.044744 | H | 25.881929 | 3.424290  | 63.795534 |
| H | 31.874470 | 7.046899 | 49.440844 | H | 48.307491 | 7.159175  | 63.833744 |
| H | 28.749301 | 4.375204 | 60.399828 | H | 46.387735 | 6.357334  | 65.153483 |
| H | 26.897759 | 3.574556 | 61.718362 | H | 41.501158 | 3.425505  | 63.794217 |
| H | 27.557372 | 3.164772 | 48.234543 | H | 54.922544 | 4.682768  | 55.325791 |
| H | 28.388452 | 7.075770 | 48.746251 | H | 56.250088 | 4.683142  | 39.763730 |
| H | 38.070848 | 5.999084 | 52.426636 | H | 57.578894 | 4.683407  | 24.200654 |
| H | 38.577838 | 2.501017 | 53.850999 | H | 32.654261 | 5.043298  | 18.026526 |
| H | 50.894855 | 3.700383 | 59.506346 | H | 17.034822 | 5.043562  | 18.026684 |
| H | 53.331569 | 3.325598 | 59.581325 | H | 10.176551 | 4.915331  | 24.089656 |
| H | 54.727847 | 3.865755 | 57.623125 | H | 8.848007  | 4.915643  | 39.653297 |
| H | 50.047603 | 5.459480 | 55.145362 | H | 7.520571  | 4.915598  | 55.216445 |
| H | 51.424850 | 5.977072 | 53.243058 | H | 12.998979 | 5.199005  | 65.269025 |
| H | 48.352200 | 2.746388 | 53.455420 | H | 28.618804 | 5.198988  | 65.268149 |
| H | 48.414502 | 2.305806 | 51.039646 | H | 44.238629 | 5.198878  | 65.267020 |
| H | 47.079489 | 3.643130 | 49.504896 | H | 48.274018 | 5.043157  | 18.026056 |
| H | 45.128224 | 6.339860 | 53.975596 | C | 34.075891 | 9.578359  | 41.045847 |
| H | 43.812692 | 7.647144 | 52.413685 | C | 34.260424 | 8.859145  | 39.762095 |
| H | 42.901703 | 7.354922 | 58.274977 | C | 33.296973 | 9.046690  | 38.611699 |
| H | 43.591806 | 3.525617 | 55.364088 | C | 31.944022 | 9.612458  | 39.072081 |
| H | 48.405600 | 6.744845 | 61.407928 | C | 32.140940 | 10.850860 | 39.956267 |
| H | 49.513894 | 7.721655 | 48.282673 | C | 32.909532 | 10.530670 | 41.253186 |
| H | 47.587985 | 6.952969 | 49.569036 | O | 33.735997 | 8.184960  | 40.908959 |
| H | 44.381545 | 4.364253 | 60.399392 | C | 37.505546 | 7.458168  | 43.628514 |
| H | 42.519357 | 3.571652 | 61.717664 | C | 38.801895 | 7.922241  | 43.932578 |
| H | 42.724387 | 3.827178 | 48.176222 | C | 39.350835 | 7.729399  | 45.201991 |
| H | 43.863390 | 7.312701 | 48.884627 | C | 38.626868 | 7.074231  | 46.204863 |
| H | 53.398458 | 5.970534 | 52.227735 | C | 37.336652 | 6.614742  | 45.911875 |
| H | 17.068243 | 7.158040 | 63.836006 | C | 36.780189 | 6.800672  | 44.645587 |

|                               |           |           |           |   |           |          |           |
|-------------------------------|-----------|-----------|-----------|---|-----------|----------|-----------|
| N                             | 36.935656 | 7.672499  | 42.376095 | C | 24.967554 | 3.357934 | 26.466904 |
| H                             | 33.161690 | 8.076676  | 38.100037 | C | 24.466015 | 4.106272 | 25.385518 |
| H                             | 35.276591 | 8.531161  | 39.496891 | C | 23.076510 | 4.398107 | 25.331023 |
| H                             | 34.960032 | 9.716037  | 41.683135 | C | 22.568676 | 5.082646 | 24.206117 |
| H                             | 31.388606 | 8.836701  | 39.630510 | C | 23.422052 | 5.504812 | 23.191661 |
| H                             | 31.334677 | 9.865412  | 38.186182 | C | 24.790461 | 5.257905 | 23.263387 |
| H                             | 32.700591 | 11.614109 | 39.379466 | C | 25.324378 | 4.549594 | 24.348592 |
| H                             | 31.166109 | 11.305115 | 40.208697 | O | 25.630313 | 5.683673 | 22.240073 |
| H                             | 32.233186 | 10.072413 | 41.998994 | O | 20.438005 | 5.523419 | 26.198059 |
| H                             | 33.289859 | 11.461878 | 41.710287 | O | 19.923562 | 3.374026 | 26.649775 |
| H                             | 33.770036 | 9.734439  | 37.882819 | C | 20.777284 | 4.306691 | 26.422397 |
| H                             | 39.376872 | 8.441884  | 43.157775 | C | 18.226927 | 4.022014 | 22.293999 |
| H                             | 40.362193 | 8.096401  | 45.409725 | C | 18.992915 | 2.941012 | 21.873981 |
| H                             | 39.060898 | 6.923782  | 47.198194 | C | 19.081890 | 2.638017 | 20.519979 |
| H                             | 36.750304 | 6.097443  | 46.679484 | C | 18.404876 | 3.417023 | 19.587993 |
| H                             | 35.773602 | 6.433827  | 44.423127 | C | 17.639888 | 4.497024 | 20.008011 |
| H                             | 37.601456 | 7.803890  | 41.618658 | C | 17.550913 | 4.800019 | 21.362013 |
| H                             | 36.185501 | 7.026136  | 42.119671 | C | 16.783924 | 5.881020 | 21.784030 |
|                               |           |           |           | C | 16.107910 | 6.659026 | 20.850045 |
|                               |           |           |           | C | 16.197885 | 6.355031 | 19.497042 |
|                               |           |           |           | C | 16.963875 | 5.274030 | 19.076025 |
|                               |           |           |           | O | 15.523872 | 7.185037 | 18.539057 |
|                               |           |           |           | O | 18.566211 | 5.530766 | 24.115823 |
|                               |           |           |           | O | 18.026895 | 3.388474 | 24.574641 |
|                               |           |           |           | C | 18.267110 | 4.337445 | 23.746915 |
|                               |           |           |           | C | 14.301000 | 5.801000 | 25.782000 |
|                               |           |           |           | C | 13.829000 | 6.909000 | 26.476000 |
|                               |           |           |           | C | 28.003061 | 7.205567 | 26.411163 |
|                               |           |           |           | C | 27.160497 | 6.327139 | 25.738602 |
|                               |           |           |           | C | 27.665686 | 5.181726 | 25.090778 |
|                               |           |           |           | C | 29.061982 | 4.920945 | 25.144679 |
|                               |           |           |           | C | 13.900000 | 3.935000 | 24.313000 |
|                               |           |           |           | C | 28.721627 | 2.965749 | 23.744422 |
| <br>(S,S)-1-TS1(QM(B3LYP)/MM) |           |           |           |   |           |          |           |
| C                             | 12.487000 | 7.261000  | 26.395000 |   |           |          |           |
| C                             | 11.616000 | 6.503000  | 25.622000 |   |           |          |           |
| C                             | 12.086000 | 5.395000  | 24.927000 |   |           |          |           |
| C                             | 13.428000 | 5.043000  | 25.007000 |   |           |          |           |
| C                             | 13.027000 | 3.179000  | 23.539000 |   |           |          |           |
| C                             | 11.685000 | 3.529000  | 23.460000 |   |           |          |           |
| C                             | 11.215000 | 4.638000  | 24.154000 |   |           |          |           |
| O                             | 10.782000 | 2.793000  | 22.654000 |   |           |          |           |
| Cu                            | 18.544887 | 6.085274  | 26.023970 |   |           |          |           |
| Cu                            | 17.957100 | 3.695592  | 26.529944 |   |           |          |           |
| C                             | 22.227527 | 3.963638  | 26.388987 |   |           |          |           |
| C                             | 22.768062 | 3.190440  | 27.432674 |   |           |          |           |
| C                             | 24.125409 | 2.894583  | 27.472355 |   |           |          |           |

|    |           |          |           |   |           |          |           |
|----|-----------|----------|-----------|---|-----------|----------|-----------|
| C  | 27.355013 | 3.186772 | 23.716769 | C | 34.024753 | 3.416989 | 19.587708 |
| C  | 26.801582 | 4.298624 | 24.390539 | C | 33.259776 | 4.496991 | 20.007741 |
| O  | 26.582152 | 2.261464 | 23.018613 | C | 33.170826 | 4.799983 | 21.361747 |
| O  | 16.597200 | 6.402138 | 25.857913 | C | 32.403848 | 5.880986 | 21.783781 |
| O  | 16.058303 | 4.261509 | 26.321682 | C | 31.727821 | 6.658997 | 20.849810 |
| C  | 15.737042 | 5.460216 | 25.988474 | C | 31.817771 | 6.355005 | 19.496805 |
| C  | 17.928321 | 5.798070 | 30.246760 | C | 32.583748 | 5.274002 | 19.075771 |
| C  | 18.910168 | 6.578925 | 30.884268 | O | 31.143743 | 7.185016 | 18.538835 |
| C  | 16.798739 | 5.353530 | 30.991402 | O | 34.165159 | 5.557496 | 24.095893 |
| C  | 15.732004 | 4.660693 | 30.380077 | O | 33.652924 | 3.421866 | 24.605763 |
| C  | 14.647463 | 4.225630 | 31.135587 | C | 33.883680 | 4.353735 | 23.751584 |
| O  | 18.432550 | 6.396894 | 27.989154 | C | 29.911438 | 5.795528 | 25.879634 |
| O  | 17.908085 | 4.248794 | 28.434820 | C | 29.365562 | 6.944824 | 26.479549 |
| C  | 18.105044 | 5.461456 | 28.805708 | C | 43.538202 | 6.878376 | 26.514355 |
| Cu | 34.179817 | 6.151136 | 25.989263 | C | 42.727526 | 6.024430 | 25.777987 |
| Cu | 33.608112 | 3.775676 | 26.571316 | C | 43.261479 | 4.904982 | 25.106501 |
| C  | 37.863442 | 4.011106 | 26.389270 | C | 44.658140 | 4.652083 | 25.192332 |
| C  | 38.389606 | 3.306502 | 27.487942 | C | 29.575144 | 3.814602 | 24.437807 |
| C  | 39.731587 | 2.951645 | 27.532556 | C | 44.372041 | 2.737804 | 23.726926 |
| C  | 40.572352 | 3.285824 | 26.477316 | C | 43.005571 | 2.956815 | 23.657329 |
| C  | 40.085477 | 3.969847 | 25.347153 | C | 42.424549 | 4.045065 | 24.346790 |
| C  | 38.710359 | 4.322713 | 25.289609 | O | 42.260013 | 2.046374 | 22.911943 |
| C  | 38.213798 | 4.944244 | 24.124968 | O | 32.209975 | 6.461640 | 25.883332 |
| C  | 39.066998 | 5.241594 | 23.066584 | O | 31.710295 | 4.324580 | 26.400811 |
| C  | 40.425150 | 4.940403 | 23.139790 | C | 31.362927 | 5.512874 | 26.064676 |
| C  | 40.947226 | 4.297528 | 24.271073 | C | 33.725023 | 6.002897 | 30.227043 |
| O  | 41.266871 | 5.254421 | 22.078491 | C | 34.798593 | 6.701829 | 30.809149 |
| O  | 36.083378 | 5.583527 | 26.126773 | C | 32.558103 | 5.747396 | 30.999169 |
| O  | 35.566375 | 3.455521 | 26.670132 | C | 31.425425 | 5.119263 | 30.441865 |
| C  | 36.419793 | 4.374430 | 26.401253 | C | 30.289780 | 4.901575 | 31.216719 |
| C  | 33.846854 | 4.021972 | 22.293718 | O | 34.132212 | 6.513921 | 27.941154 |
| C  | 34.612831 | 2.940969 | 21.873683 | O | 33.594894 | 4.386844 | 28.469214 |
| C  | 34.701781 | 2.637978 | 20.519678 | C | 33.828205 | 5.607483 | 28.795709 |

|    |           |          |           |    |           |          |           |
|----|-----------|----------|-----------|----|-----------|----------|-----------|
| Cu | 49.692226 | 6.198828 | 25.992698 | O  | 47.713306 | 6.329281 | 25.894979 |
| Cu | 49.346310 | 3.778166 | 26.563181 | O  | 47.394804 | 4.159280 | 26.420796 |
| C  | 53.571003 | 4.464792 | 26.367939 | C  | 46.948279 | 5.320270 | 26.098813 |
| C  | 54.157058 | 3.947774 | 27.515902 | C  | 49.184432 | 5.959134 | 30.229132 |
| C  | 55.530059 | 3.732759 | 27.559826 | C  | 50.110298 | 6.815000 | 30.853347 |
| C  | 56.316002 | 4.036762 | 26.454787 | C  | 48.082627 | 5.456962 | 30.977936 |
| C  | 55.729946 | 4.554780 | 25.305823 | C  | 47.069257 | 4.680752 | 30.375994 |
| C  | 54.356947 | 4.768795 | 25.262899 | C  | 46.009172 | 4.193590 | 31.133804 |
| C  | 53.770890 | 5.287813 | 24.113936 | O  | 49.601311 | 6.550406 | 27.952216 |
| C  | 54.557834 | 5.591815 | 23.007897 | O  | 49.300102 | 4.372177 | 28.456622 |
| C  | 55.929834 | 5.377800 | 23.052821 | C  | 49.382124 | 5.607288 | 28.795423 |
| C  | 56.515889 | 4.858782 | 24.200784 | C  | 11.158286 | 7.260970 | 41.959133 |
| O  | 56.643771 | 5.617805 | 21.841785 | C  | 10.287269 | 6.502976 | 41.186145 |
| O  | 51.635053 | 5.834338 | 26.128959 | C  | 10.757253 | 5.394976 | 40.491133 |
| O  | 51.337148 | 3.654609 | 26.632130 | C  | 12.099253 | 5.042971 | 40.571108 |
| C  | 52.092986 | 4.663321 | 26.381188 | C  | 11.698221 | 3.178978 | 39.103109 |
| C  | 49.466779 | 4.021876 | 22.293156 | C  | 10.356221 | 3.528983 | 39.024134 |
| C  | 50.232745 | 2.940872 | 21.873104 | C  | 9.886237  | 4.637982 | 39.718146 |
| C  | 50.321669 | 2.637885 | 20.519096 | O  | 9.453204  | 2.792989 | 38.218147 |
| C  | 49.644627 | 3.416901 | 19.587140 | Cu | 17.245723 | 6.023685 | 41.554423 |
| C  | 48.879661 | 4.496905 | 20.007192 | Cu | 16.611825 | 3.646934 | 42.061901 |
| C  | 48.790737 | 4.799893 | 21.361200 | C  | 20.880801 | 3.828897 | 42.069571 |
| C  | 48.023772 | 5.880897 | 21.783251 | C  | 21.360547 | 3.165639 | 43.213826 |
| C  | 47.347731 | 6.658913 | 20.849295 | C  | 22.706393 | 2.843549 | 43.340276 |
| C  | 47.437655 | 6.354926 | 19.496287 | C  | 23.596252 | 3.167368 | 42.321871 |
| C  | 48.203620 | 5.273922 | 19.075235 | C  | 23.154592 | 3.798336 | 41.144561 |
| O  | 46.763613 | 7.184943 | 18.538331 | C  | 21.777959 | 4.121610 | 41.005946 |
| O  | 49.727819 | 5.589692 | 24.095035 | C  | 21.330158 | 4.699296 | 39.800165 |
| O  | 49.385695 | 3.422120 | 24.606890 | C  | 22.229863 | 4.965287 | 38.771793 |
| C  | 49.524083 | 4.367372 | 23.750843 | C  | 23.585483 | 4.682197 | 38.919677 |
| C  | 45.479062 | 5.519926 | 25.964408 | C  | 24.057786 | 4.102303 | 40.101706 |
| C  | 44.900396 | 6.632538 | 26.603007 | O  | 24.471681 | 4.958355 | 37.886463 |
| C  | 45.199365 | 3.567796 | 24.474104 | O  | 19.132893 | 5.417813 | 41.737264 |

|   |           |          |           |    |           |          |           |
|---|-----------|----------|-----------|----|-----------|----------|-----------|
| O | 18.563600 | 3.288050 | 42.219064 | C  | 17.742460 | 6.402773 | 32.981067 |
| C | 19.440459 | 4.200932 | 42.009178 | C  | 16.720734 | 5.643420 | 32.380031 |
| C | 16.907274 | 4.002698 | 37.811036 | C  | 15.469083 | 5.395501 | 46.518410 |
| C | 17.600060 | 2.887582 | 37.306687 | C  | 14.379413 | 4.731247 | 45.916908 |
| C | 17.626428 | 2.623273 | 35.943491 | C  | 13.272622 | 4.361863 | 46.675266 |
| C | 16.956957 | 3.463380 | 35.060184 | C  | 14.591460 | 4.467035 | 32.505824 |
| C | 16.221988 | 4.574223 | 35.522539 | C  | 15.615087 | 5.185232 | 33.138636 |
| C | 16.180731 | 4.838208 | 36.917959 | O  | 13.500819 | 4.026803 | 33.247546 |
| C | 15.391489 | 5.908005 | 37.386215 | O  | 17.138727 | 6.340995 | 43.514978 |
| C | 14.700798 | 6.715790 | 36.491778 | O  | 16.551422 | 4.210573 | 43.967641 |
| C | 14.763217 | 6.492664 | 35.126476 | C  | 16.783475 | 5.419289 | 44.334088 |
| C | 15.529562 | 5.420389 | 34.616411 | Cu | 32.553362 | 7.240402 | 41.582470 |
| O | 14.065904 | 7.381753 | 34.311580 | Cu | 32.554659 | 4.380170 | 42.094933 |
| O | 17.267868 | 5.473555 | 39.647770 | C  | 36.634393 | 3.643267 | 41.811019 |
| O | 16.709718 | 3.334325 | 40.095240 | C  | 37.107431 | 2.752861 | 42.755699 |
| C | 16.968376 | 4.284062 | 39.270926 | C  | 38.452663 | 2.315201 | 42.706422 |
| C | 12.972270 | 5.800966 | 41.346096 | C  | 39.308479 | 2.775244 | 41.728819 |
| C | 12.500286 | 6.908965 | 42.040108 | C  | 38.857051 | 3.665165 | 40.699563 |
| C | 26.553711 | 7.078046 | 41.999875 | C  | 37.475932 | 4.066025 | 40.727888 |
| C | 25.765387 | 6.103568 | 41.426713 | C  | 36.980598 | 4.860119 | 39.653698 |
| C | 26.318582 | 4.891870 | 40.899119 | C  | 37.802168 | 5.270076 | 38.629968 |
| C | 27.743766 | 4.701349 | 41.021736 | C  | 39.187632 | 4.957069 | 38.644268 |
| C | 12.571237 | 3.934972 | 39.877096 | C  | 39.718033 | 4.169090 | 39.664943 |
| C | 27.523103 | 2.553337 | 39.893853 | O  | 39.998423 | 5.437624 | 37.660443 |
| C | 26.121229 | 2.736265 | 39.760347 | O  | 35.192161 | 5.514524 | 41.936870 |
| C | 25.514410 | 3.885525 | 40.254017 | O  | 34.291060 | 3.487044 | 42.199701 |
| O | 25.494558 | 1.698863 | 39.129643 | C  | 35.272553 | 4.268280 | 41.988327 |
| O | 15.291434 | 6.378836 | 41.395243 | C  | 32.692389 | 5.051183 | 37.885388 |
| O | 14.724930 | 4.244348 | 41.848224 | C  | 33.345354 | 3.894680 | 37.486770 |
| C | 14.414970 | 5.450684 | 41.534242 | C  | 33.372915 | 3.526821 | 36.127431 |
| C | 16.620233 | 5.774357 | 45.771714 | C  | 32.722880 | 4.294976 | 35.185154 |
| C | 17.632218 | 6.525323 | 46.398398 | C  | 32.008877 | 5.486483 | 35.537317 |
| C | 18.818788 | 6.875041 | 32.238435 | C  | 32.004774 | 5.871423 | 36.928001 |



|   |           |          |           |    |           |          |           |
|---|-----------|----------|-----------|----|-----------|----------|-----------|
| C | 31.267137 | 7.032787 | 37.302403 | O  | 32.669181 | 7.243186 | 43.572822 |
| C | 30.583322 | 7.768132 | 36.368950 | O  | 32.542014 | 5.024567 | 43.954583 |
| C | 30.595713 | 7.407978 | 34.995475 | C  | 32.502544 | 6.233394 | 44.318704 |
| C | 31.302163 | 6.287914 | 34.568779 | Cu | 48.363699 | 6.228703 | 41.578534 |
| O | 29.882666 | 8.266417 | 34.207117 | Cu | 48.031476 | 3.785266 | 42.061351 |
| O | 32.832491 | 6.560083 | 39.732765 | C  | 52.242278 | 4.464620 | 41.931334 |
| O | 32.623433 | 4.352461 | 40.121932 | C  | 52.828353 | 3.947597 | 43.079285 |
| C | 32.707669 | 5.355035 | 39.357409 | C  | 54.201353 | 3.732577 | 43.123183 |
| C | 28.539149 | 5.740866 | 41.613708 | C  | 54.987278 | 4.036581 | 42.018131 |
| C | 27.949399 | 6.908886 | 42.073628 | C  | 54.401203 | 4.554604 | 40.869180 |
| C | 42.146879 | 6.665296 | 42.153385 | C  | 53.028203 | 4.768624 | 40.826281 |
| C | 41.377158 | 5.832992 | 41.349593 | C  | 52.442128 | 5.287648 | 39.677330 |
| C | 41.969371 | 4.818356 | 40.569595 | C  | 53.229054 | 5.591652 | 38.571278 |
| C | 43.378123 | 4.641375 | 40.625605 | C  | 54.601054 | 5.377632 | 38.616177 |
| C | 28.308761 | 3.500954 | 40.499066 | C  | 55.187129 | 4.858609 | 39.764128 |
| C | 43.186414 | 2.849580 | 38.998029 | O  | 55.314970 | 5.617639 | 37.405129 |
| C | 41.810365 | 2.998767 | 38.950695 | O  | 50.311629 | 5.853248 | 41.710101 |
| C | 41.183702 | 3.989107 | 39.731792 | O  | 50.011826 | 3.664760 | 42.174828 |
| O | 41.105544 | 2.124941 | 38.127730 | C  | 50.767547 | 4.675722 | 41.945476 |
| O | 30.660714 | 6.747784 | 41.572571 | C  | 48.246489 | 4.215060 | 37.812485 |
| O | 30.583960 | 4.558855 | 42.016261 | C  | 49.048453 | 3.170896 | 37.317151 |
| C | 30.031781 | 5.661490 | 41.736901 | C  | 49.118332 | 2.910770 | 35.955278 |
| C | 32.254293 | 6.493919 | 45.778724 | C  | 48.385394 | 3.684537 | 35.062667 |
| C | 33.017266 | 7.462803 | 46.405451 | C  | 47.546402 | 4.724310 | 35.513549 |
| C | 34.748019 | 7.114023 | 32.134210 | C  | 47.460908 | 4.982990 | 36.908331 |
| C | 33.618690 | 6.849429 | 32.899682 | C  | 46.570385 | 5.976163 | 37.363390 |
| C | 32.512149 | 6.170871 | 32.355172 | C  | 45.827615 | 6.722638 | 36.457381 |
| C | 31.254012 | 5.765196 | 46.509357 | C  | 45.929074 | 6.505462 | 35.093452 |
| C | 30.390589 | 4.816141 | 45.889161 | C  | 46.792213 | 5.503032 | 34.596233 |
| C | 29.416212 | 4.164835 | 46.606636 | O  | 45.168832 | 7.330178 | 34.267160 |
| C | 30.253099 | 5.289987 | 32.553490 | O  | 48.409924 | 5.707188 | 39.663542 |
| C | 31.356890 | 5.925597 | 33.132525 | O  | 48.133504 | 3.510030 | 40.090791 |
| O | 29.105771 | 5.080076 | 33.307636 | C  | 48.263724 | 4.492771 | 39.274979 |

|    |           |          |           |   |           |          |           |
|----|-----------|----------|-----------|---|-----------|----------|-----------|
| C  | 44.155659 | 5.481222 | 41.470250 | C | 22.327196 | 3.370974 | 57.463544 |
| C  | 43.522961 | 6.497938 | 42.207098 | C | 21.813615 | 4.118717 | 56.386876 |
| C  | 43.973606 | 3.656250 | 39.812801 | C | 20.429034 | 4.435197 | 56.362140 |
| O  | 46.377601 | 6.346185 | 41.477209 | C | 19.907499 | 5.125764 | 55.247480 |
| O  | 46.085394 | 4.146544 | 41.884451 | C | 20.743862 | 5.523466 | 54.209215 |
| C  | 45.626438 | 5.314446 | 41.616232 | C | 22.108738 | 5.250661 | 54.250179 |
| C  | 47.850318 | 5.868144 | 45.793005 | C | 22.655635 | 4.540766 | 55.328047 |
| C  | 48.807951 | 6.679452 | 46.429303 | O | 22.932248 | 5.654505 | 53.205283 |
| C  | 49.992029 | 7.132169 | 32.201099 | O | 17.798652 | 5.575926 | 57.299358 |
| C  | 48.943428 | 6.607013 | 32.948847 | O | 17.303133 | 3.406870 | 57.674651 |
| C  | 47.976621 | 5.770678 | 32.359262 | C | 18.147648 | 4.354495 | 57.483714 |
| C  | 46.716859 | 5.418790 | 46.525437 | C | 15.640359 | 4.198440 | 53.325160 |
| C  | 45.683610 | 4.679368 | 45.912564 | C | 16.359512 | 3.102712 | 52.814498 |
| C  | 44.587518 | 4.251075 | 46.655074 | C | 16.379475 | 2.836099 | 51.452521 |
| C  | 45.927547 | 4.460534 | 32.497796 | C | 15.675879 | 3.653386 | 50.575750 |
| C  | 46.898520 | 5.256082 | 33.121551 | C | 14.922527 | 4.750445 | 51.042340 |
| O  | 44.862938 | 3.965627 | 33.242697 | C | 14.891257 | 5.019273 | 52.437474 |
| O  | 48.268183 | 6.509421 | 43.541436 | C | 14.086379 | 6.074850 | 52.910336 |
| O  | 47.935888 | 4.320122 | 43.976460 | C | 13.369201 | 6.864336 | 52.019994 |
| C  | 48.035663 | 5.544159 | 44.353089 | C | 13.419015 | 6.635482 | 50.654699 |
| C  | 9.830848  | 7.260896 | 57.522290 | C | 14.199718 | 5.575530 | 50.140060 |
| C  | 8.959816  | 6.502907 | 56.749315 | O | 12.697882 | 7.509653 | 49.844492 |
| C  | 9.429783  | 5.394908 | 56.054291 | O | 15.945546 | 5.636232 | 55.205294 |
| C  | 10.771783 | 5.042898 | 56.134241 | O | 15.431822 | 3.472628 | 55.584336 |
| C  | 10.370718 | 3.178911 | 54.666243 | C | 15.676770 | 4.450798 | 54.790965 |
| C  | 9.028718  | 3.528920 | 54.587293 | C | 11.644816 | 5.800887 | 56.909216 |
| C  | 8.558750  | 4.637919 | 55.281317 | C | 11.172849 | 6.908886 | 57.603240 |
| O  | 8.125684  | 2.792932 | 53.781319 | C | 25.318241 | 7.058901 | 57.566156 |
| Cu | 15.897310 | 6.124624 | 57.133100 | C | 24.483082 | 6.230148 | 56.826580 |
| Cu | 15.338838 | 3.713535 | 57.556376 | C | 24.992908 | 5.124834 | 56.114843 |
| C  | 19.597362 | 4.018780 | 57.439553 | C | 26.388039 | 4.857433 | 56.165826 |
| C  | 20.148853 | 3.250039 | 58.480732 | C | 11.243751 | 3.934900 | 55.440217 |
| C  | 21.501906 | 2.934305 | 58.494261 | C | 26.057291 | 2.993534 | 54.645112 |

|    |           |          |           |   |           |          |           |
|----|-----------|----------|-----------|---|-----------|----------|-----------|
| C  | 24.691239 | 3.219948 | 54.617138 | O | 33.397065 | 5.603000 | 57.274231 |
| C  | 24.133435 | 4.289001 | 55.354026 | O | 32.936181 | 3.432073 | 57.683262 |
| O  | 23.922786 | 2.337396 | 53.861361 | C | 33.764987 | 4.389444 | 57.480803 |
| O  | 13.942269 | 6.425366 | 56.972154 | C | 31.309429 | 4.188184 | 53.326931 |
| O  | 13.432557 | 4.266242 | 57.373791 | C | 32.131339 | 3.159589 | 52.832165 |
| C  | 13.091833 | 5.471600 | 57.086640 | C | 32.238291 | 2.927779 | 51.467193 |
| C  | 15.283046 | 5.695821 | 61.352095 | C | 31.518562 | 3.711126 | 50.571994 |
| C  | 16.314087 | 6.385804 | 61.978046 | C | 30.653231 | 4.727436 | 51.023357 |
| C  | 17.545150 | 6.859467 | 47.743496 | C | 30.539314 | 4.965604 | 52.419397 |
| C  | 16.443139 | 6.455890 | 48.488086 | C | 29.640790 | 5.952153 | 52.871852 |
| C  | 15.394704 | 5.723915 | 47.898806 | C | 28.903273 | 6.699256 | 51.959944 |
| C  | 14.198081 | 5.242825 | 62.095148 | C | 29.025786 | 6.494052 | 50.595723 |
| C  | 13.166040 | 4.552842 | 61.469196 | C | 29.904621 | 5.506487 | 50.109172 |
| C  | 12.083075 | 4.099846 | 62.213249 | O | 28.267536 | 7.310737 | 49.761480 |
| C  | 13.219654 | 4.637324 | 48.039461 | O | 31.512306 | 5.640193 | 55.205006 |
| C  | 14.268738 | 5.327385 | 48.662409 | O | 31.076924 | 3.459641 | 55.586243 |
| O  | 12.109332 | 4.256670 | 48.784914 | C | 31.296096 | 4.443951 | 54.792382 |
| O  | 15.764837 | 6.371178 | 59.106887 | C | 27.230595 | 5.684224 | 56.960051 |
| O  | 15.278703 | 4.201252 | 59.481208 | C | 26.678550 | 6.791032 | 57.631025 |
| C  | 15.449008 | 5.405654 | 59.893064 | C | 40.901338 | 6.919839 | 57.625469 |
| Cu | 31.478852 | 6.124032 | 57.133774 | C | 40.079613 | 6.103933 | 56.859499 |
| Cu | 30.972611 | 3.701303 | 57.560684 | C | 40.601299 | 5.012664 | 56.134266 |
| C  | 35.217288 | 4.065682 | 57.456783 | C | 41.998331 | 4.751451 | 56.192106 |
| C  | 35.763856 | 3.338311 | 58.530088 | C | 26.906120 | 3.795697 | 55.397598 |
| C  | 37.110719 | 2.999741 | 58.550506 | C | 41.687055 | 2.906631 | 54.645662 |
| C  | 37.934943 | 3.370375 | 57.494144 | C | 40.320094 | 3.129826 | 54.606104 |
| C  | 37.427855 | 4.080740 | 56.389251 | C | 39.750943 | 4.187738 | 55.350964 |
| C  | 36.049149 | 4.423427 | 56.359709 | O | 39.562089 | 2.251772 | 53.834831 |
| C  | 35.533172 | 5.079457 | 55.222816 | O | 29.509871 | 6.388053 | 57.009718 |
| C  | 36.369686 | 5.414812 | 54.162678 | O | 29.059592 | 4.209812 | 57.381203 |
| C  | 37.729875 | 5.117227 | 54.206330 | C | 28.685572 | 5.410699 | 57.123635 |
| C  | 38.272080 | 4.443293 | 55.309949 | C | 30.903120 | 5.695641 | 61.351269 |
| O  | 38.553495 | 5.463954 | 53.141273 | C | 31.934175 | 6.385618 | 61.977205 |

|    |           |          |           |   |           |          |           |
|----|-----------|----------|-----------|---|-----------|----------|-----------|
| C  | 32.862872 | 7.707466 | 47.787552 | C | 46.131075 | 5.063561 | 52.427290 |
| C  | 31.928330 | 7.009552 | 48.521279 | C | 45.230810 | 6.041399 | 52.894500 |
| C  | 31.076775 | 6.028279 | 47.915968 | C | 44.442466 | 6.754472 | 51.999683 |
| C  | 29.818167 | 5.242646 | 62.094340 | C | 44.511131 | 6.521242 | 50.635863 |
| C  | 28.786113 | 4.552669 | 61.468405 | C | 45.388116 | 5.536032 | 50.127010 |
| C  | 27.703159 | 4.099675 | 62.212476 | O | 43.713702 | 7.321554 | 49.820634 |
| C  | 29.249767 | 4.400153 | 47.996216 | O | 47.112132 | 5.776199 | 55.208423 |
| C  | 30.067254 | 5.318083 | 48.651855 | O | 46.810934 | 3.569742 | 55.569171 |
| O  | 28.286783 | 3.727006 | 48.685613 | C | 46.959649 | 4.573258 | 54.784520 |
| O  | 31.371495 | 6.369453 | 59.106201 | C | 42.830744 | 5.577225 | 56.997622 |
| O  | 30.904582 | 4.195664 | 59.484742 | C | 42.262308 | 6.662033 | 57.691978 |
| C  | 31.067221 | 5.402547 | 59.893942 | C | 42.527144 | 3.702102 | 55.415669 |
| Cu | 47.043620 | 6.235715 | 57.144378 | O | 45.068689 | 6.379426 | 57.019792 |
| Cu | 46.687758 | 3.780526 | 57.539933 | O | 44.740229 | 4.174184 | 57.358578 |
| C  | 50.914829 | 4.464394 | 57.493750 | C | 44.299167 | 5.358913 | 57.126397 |
| C  | 51.500923 | 3.947364 | 58.641689 | C | 46.523195 | 5.695406 | 61.350162 |
| C  | 52.873923 | 3.732339 | 58.685563 | C | 47.554262 | 6.385378 | 61.976082 |
| C  | 53.659830 | 4.036343 | 57.580498 | C | 48.682175 | 7.013149 | 47.771274 |
| C  | 53.073736 | 4.554373 | 56.431559 | C | 47.593499 | 6.550531 | 48.500957 |
| C  | 51.700736 | 4.768398 | 56.388685 | C | 46.600392 | 5.751993 | 47.901262 |
| C  | 51.114643 | 5.287428 | 55.239746 | C | 45.438253 | 5.242413 | 62.093251 |
| C  | 51.901549 | 5.591433 | 54.133681 | C | 44.406185 | 4.552442 | 61.467332 |
| C  | 53.273549 | 5.377407 | 54.178555 | C | 43.323243 | 4.099449 | 62.211421 |
| C  | 53.859642 | 4.858378 | 55.326493 | C | 44.493531 | 4.535622 | 48.015253 |
| O  | 53.987445 | 5.617415 | 52.967495 | C | 45.488873 | 5.291901 | 48.650165 |
| O  | 48.986109 | 5.851278 | 57.293116 | O | 43.393649 | 4.098395 | 48.744471 |
| O  | 48.674848 | 3.648142 | 57.672883 | O | 46.916528 | 6.437636 | 59.118945 |
| C  | 49.436890 | 4.667091 | 57.496328 | O | 46.576139 | 4.233752 | 59.466530 |
| C  | 46.955886 | 4.323710 | 53.318419 | C | 46.675230 | 5.440257 | 59.890976 |
| C  | 47.780799 | 3.302401 | 52.812840 | C | 16.262162 | 6.620790 | 63.347051 |
| C  | 47.822962 | 3.027757 | 51.453530 | C | 15.179196 | 6.168795 | 64.090104 |
| C  | 47.038548 | 3.763562 | 50.573809 | C | 14.147156 | 5.478812 | 63.465153 |
| C  | 46.185445 | 4.788360 | 51.034190 | C | 12.031150 | 4.336833 | 63.582254 |

|   |           |          |           |   |           |          |           |
|---|-----------|----------|-----------|---|-----------|----------|-----------|
| C | 13.063191 | 5.025817 | 64.207206 | H | 19.761969 | 6.945039 | 30.321984 |
| O | 10.943187 | 3.908837 | 64.361307 | H | 15.708960 | 4.458494 | 29.314746 |
| C | 31.882275 | 6.620600 | 63.346211 | H | 13.844887 | 3.692691 | 30.644201 |
| C | 30.799322 | 6.168606 | 64.089282 | H | 15.672755 | 6.862232 | 17.596205 |
| C | 29.767267 | 5.478629 | 63.464346 | H | 25.137467 | 6.205802 | 21.531015 |
| C | 27.651260 | 4.336658 | 63.581482 | H | 25.600532 | 2.480657 | 23.028238 |
| C | 28.683314 | 5.025635 | 64.206417 | H | 37.746911 | 3.038584 | 28.319187 |
| O | 26.563309 | 3.908663 | 64.360554 | H | 40.123943 | 2.414688 | 28.390279 |
| C | 47.502389 | 6.620356 | 63.345091 | H | 41.611416 | 2.992962 | 26.544931 |
| C | 46.419447 | 6.168363 | 64.088179 | H | 37.165484 | 5.199156 | 24.009532 |
| C | 45.387379 | 5.478391 | 63.463260 | H | 38.662997 | 5.720969 | 22.185356 |
| C | 43.271369 | 4.336426 | 63.580429 | H | 35.152105 | 2.331575 | 22.590966 |
| C | 44.303437 | 5.025398 | 64.205349 | H | 35.299378 | 1.794141 | 20.190293 |
| O | 42.183431 | 3.908432 | 64.359519 | H | 34.100185 | 3.170662 | 18.536569 |
| H | 12.119162 | 8.126851 | 26.936097 | H | 32.262462 | 6.142869 | 22.825988 |
| H | 10.573058 | 6.786744 | 25.566649 | H | 31.123931 | 7.499409 | 21.164019 |
| H | 13.382553 | 2.322889 | 22.982209 | H | 30.006108 | 7.631306 | 27.021753 |
| H | 9.847319  | 3.169209 | 22.676960 | H | 43.106927 | 7.739334 | 27.014892 |
| H | 22.126971 | 2.831599 | 28.230133 | H | 41.673865 | 6.257482 | 25.725468 |
| H | 24.529811 | 2.307280 | 28.290556 | H | 30.635747 | 3.595058 | 24.394310 |
| H | 26.019514 | 3.114277 | 26.532719 | H | 44.793925 | 1.902148 | 23.184531 |
| H | 21.510853 | 5.288362 | 24.083283 | H | 35.682567 | 6.925690 | 30.222343 |
| H | 23.008277 | 6.031066 | 22.342245 | H | 31.395084 | 4.800506 | 29.404593 |
| H | 19.532595 | 2.329982 | 22.589862 | H | 29.430910 | 4.422597 | 30.765849 |
| H | 19.679688 | 1.794311 | 20.190487 | H | 31.287803 | 6.858532 | 17.596631 |
| H | 18.480737 | 3.170890 | 18.536796 | H | 40.787365 | 5.751516 | 21.342682 |
| H | 16.654033 | 6.146122 | 22.827363 | H | 41.277767 | 2.261833 | 22.897646 |
| H | 15.506826 | 7.501473 | 21.163973 | H | 53.552136 | 3.699777 | 28.381240 |
| H | 14.495415 | 7.507684 | 27.088153 | H | 55.987748 | 3.326089 | 28.455735 |
| H | 27.594316 | 8.089977 | 26.889129 | H | 57.384003 | 3.866300 | 26.497924 |
| H | 26.105419 | 6.560431 | 25.712863 | H | 52.703422 | 5.454566 | 24.016527 |
| H | 14.941439 | 3.633401 | 24.313924 | H | 54.081210 | 5.976643 | 22.116896 |
| H | 29.123062 | 2.114707 | 23.210509 | H | 50.777214 | 2.334799 | 22.589378 |

|   |           |          |           |   |           |          |           |
|---|-----------|----------|-----------|---|-----------|----------|-----------|
| H | 50.920782 | 1.795151 | 20.189784 | H | 14.357524 | 4.499749 | 44.857446 |
| H | 49.720313 | 3.170768 | 18.536027 | H | 12.451976 | 3.849754 | 46.191707 |
| H | 47.864632 | 6.135383 | 22.823906 | H | 12.847727 | 3.494973 | 32.691695 |
| H | 46.740833 | 7.497068 | 21.163738 | H | 14.136987 | 7.157922 | 33.333676 |
| H | 45.519601 | 7.313799 | 27.175963 | H | 24.026864 | 5.424117 | 37.109065 |
| H | 46.261063 | 3.348800 | 24.467956 | H | 24.543586 | 1.852344 | 39.015352 |
| H | 50.938587 | 7.224716 | 30.286055 | H | 36.443101 | 2.415864 | 43.556432 |
| H | 47.070331 | 4.450209 | 29.316148 | H | 38.822256 | 1.619779 | 43.467012 |
| H | 45.246982 | 3.598253 | 30.649747 | H | 40.350130 | 2.439187 | 41.736013 |
| H | 46.905251 | 6.856655 | 17.596419 | H | 35.925160 | 5.135495 | 39.630590 |
| H | 56.056583 | 5.972314 | 21.101465 | H | 37.390529 | 5.858684 | 37.801098 |
| H | 10.790729 | 8.127309 | 42.499542 | H | 33.832362 | 3.271878 | 38.240553 |
| H | 9.244486  | 6.787007 | 41.130249 | H | 33.901549 | 2.618858 | 35.819609 |
| H | 12.054552 | 2.325243 | 38.543046 | H | 32.754218 | 3.960560 | 34.143196 |
| H | 8.521095  | 3.175523 | 38.233243 | H | 31.242476 | 7.335246 | 38.348286 |
| H | 20.681064 | 2.914653 | 44.020781 | H | 30.007051 | 8.651819 | 36.656502 |
| H | 23.064701 | 2.345034 | 44.235397 | H | 28.580372 | 7.693130 | 42.497155 |
| H | 24.638963 | 2.907542 | 42.455518 | H | 41.673462 | 7.442100 | 42.742683 |
| H | 20.284890 | 4.940030 | 39.630937 | H | 40.308458 | 5.996049 | 41.338942 |
| H | 21.863223 | 5.405220 | 37.854033 | H | 29.382564 | 3.337592 | 40.581066 |
| H | 18.135507 | 2.229351 | 37.981557 | H | 43.649900 | 2.090770 | 38.380945 |
| H | 18.173167 | 1.764926 | 35.566647 | H | 33.750620 | 8.025515 | 45.822605 |
| H | 17.002893 | 3.226428 | 34.006664 | H | 35.586151 | 7.648035 | 32.570469 |
| H | 15.284012 | 6.130501 | 38.441750 | H | 33.610553 | 7.194763 | 33.925624 |
| H | 14.101459 | 7.538258 | 36.858979 | H | 30.498421 | 4.598839 | 44.827220 |
| H | 13.169012 | 7.507329 | 42.649630 | H | 28.759595 | 3.446297 | 46.101375 |
| H | 26.095032 | 7.992907 | 42.388291 | H | 28.402270 | 4.558849 | 32.804614 |
| H | 24.686627 | 6.283312 | 41.375757 | H | 29.831920 | 7.972116 | 33.284675 |
| H | 13.612543 | 3.635470 | 39.865579 | H | 39.475095 | 5.957278 | 37.028683 |
| H | 27.956470 | 1.635677 | 39.486726 | H | 40.108752 | 2.278035 | 38.145283 |
| H | 18.501690 | 6.842685 | 45.833417 | H | 52.223433 | 3.700964 | 43.944931 |
| H | 19.589774 | 7.469418 | 32.718261 | H | 54.659087 | 3.326013 | 44.019088 |
| H | 17.706304 | 6.648320 | 34.033935 | H | 56.055258 | 3.866002 | 42.061101 |

|                                |                                |
|--------------------------------|--------------------------------|
| H 51.374884 5.456905 39.581719 | H 23.429927 6.471191 56.801715 |
| H 52.752485 5.976834 37.680304 | H 12.285065 3.635911 55.428186 |
| H 49.635964 2.565934 37.998896 | H 26.462037 2.175769 54.063789 |
| H 49.748600 2.107724 35.587002 | H 17.168767 6.738532 61.410850 |
| H 48.467327 3.451705 34.010529 | H 18.338158 7.431903 48.214078 |
| H 46.422124 6.183813 38.416846 | H 16.409479 6.732490 49.533224 |
| H 45.151901 7.488309 36.814476 | H 13.129544 4.375261 60.400562 |
| H 44.107636 7.153234 42.843209 | H 11.277672 3.574415 61.719350 |
| H 45.046820 3.499548 39.785504 | H 11.441267 3.733568 48.238603 |
| H 49.661280 7.050460 45.872522 | H 12.767718 7.286882 48.866349 |
| H 50.719980 7.785035 32.671924 | H 22.433810 6.181029 52.503289 |
| H 48.883999 6.871337 33.996115 | H 22.944416 2.570002 53.859483 |
| H 45.699645 4.430926 44.856671 | H 35.132246 3.035830 59.357957 |
| H 43.808303 3.684973 46.163031 | H 37.519149 2.443582 59.388106 |
| H 44.248552 3.381457 32.695208 | H 38.977279 3.085297 57.540290 |
| H 45.271667 7.111311 33.290920 | H 34.482516 5.334211 55.131177 |
| H 54.726181 5.963437 36.661825 | H 35.950858 5.918975 53.302384 |
| H 9.463416 8.127123 58.062871  | H 32.707105 2.546654 53.516677 |
| H 7.917069 6.786908 56.693463  | H 32.886648 2.139396 51.098373 |
| H 10.727121 2.325243 54.106135 | H 31.631610 3.503135 49.516191 |
| H 7.194644 3.178102 53.792931  | H 29.486428 6.153310 53.926909 |
| H 19.518764 2.904901 59.292859 | H 28.216113 7.456926 52.313587 |
| H 21.915569 2.348848 59.309041 | H 27.313950 7.440735 58.222606 |
| H 23.375411 3.107291 57.506115 | H 40.479302 7.758985 58.169010 |
| H 18.852058 5.357713 55.153583 | H 39.026849 6.344373 56.827097 |
| H 20.320506 6.053696 53.367018 | H 27.966584 3.575923 55.352239 |
| H 16.914484 2.456255 53.485105 | H 42.099780 2.097233 54.058279 |
| H 16.943504 1.990595 51.072079 | H 32.788539 6.738399 61.409699 |
| H 15.712795 3.409502 49.523711 | H 33.489368 8.458628 48.279148 |
| H 13.988447 6.301126 53.966060 | H 31.834410 7.225968 49.590099 |
| H 12.758910 7.677283 52.390371 | H 28.749938 4.374323 60.399835 |
| H 11.840692 7.508882 58.212359 | H 26.897598 3.574432 61.718501 |
| H 24.905964 7.911010 58.096862 | H 27.820086 3.122761 48.085328 |

|   |           |          |           |   |           |           |           |
|---|-----------|----------|-----------|---|-----------|-----------|-----------|
| H | 28.384990 | 7.097811 | 48.782280 | H | 56.249989 | 4.683155  | 39.763378 |
| H | 38.060215 | 5.973553 | 52.423291 | H | 57.578800 | 4.683540  | 24.200304 |
| H | 38.582399 | 2.478251 | 53.830247 | H | 32.654255 | 5.043759  | 18.026566 |
| H | 50.894907 | 3.699180 | 59.506001 | H | 17.034637 | 5.043882  | 18.026730 |
| H | 53.331521 | 3.325266 | 59.581236 | H | 10.176601 | 4.914999  | 24.089514 |
| H | 54.727762 | 3.865581 | 57.623252 | H | 8.847988  | 4.915089  | 39.653448 |
| H | 50.047671 | 5.460308 | 55.145837 | H | 7.520533  | 4.915012  | 55.216669 |
| H | 51.425006 | 5.977511 | 53.243045 | H | 12.998674 | 5.198779  | 65.268925 |
| H | 48.397406 | 2.717623 | 53.486487 | H | 28.618491 | 5.198817  | 65.268043 |
| H | 48.465206 | 2.237714 | 51.077976 | H | 44.238386 | 5.198712  | 65.266932 |
| H | 47.092863 | 3.512041 | 49.524485 | H | 48.274034 | 5.043592  | 18.026087 |
| H | 45.112924 | 6.264024 | 53.949085 | C | 35.450545 | 8.525539  | 42.254206 |
| H | 43.758186 | 7.508344 | 52.365777 | C | 35.063811 | 8.491532  | 40.828378 |
| H | 42.888709 | 7.310919 | 58.294107 | C | 35.575408 | 9.625419  | 39.944667 |
| H | 43.588713 | 3.485951 | 55.379214 | C | 35.580978 | 10.977643 | 40.671162 |
| H | 48.405742 | 6.744156 | 61.407874 | C | 36.350300 | 10.885453 | 41.997365 |
| H | 49.431605 | 7.635224 | 48.249996 | C | 35.752615 | 9.825541  | 42.936109 |
| H | 47.525385 | 6.833653 | 49.542594 | O | 33.776396 | 8.727630  | 41.346530 |
| H | 44.382349 | 4.363055 | 60.399494 | C | 38.137175 | 7.494619  | 43.458524 |
| H | 42.519303 | 3.571323 | 61.717859 | C | 39.169300 | 8.432658  | 43.641566 |
| H | 42.765667 | 3.532911 | 48.192486 | C | 39.849861 | 8.504459  | 44.859989 |
| H | 43.786701 | 7.084397 | 48.846424 | C | 39.507979 | 7.652056  | 45.915740 |
| H | 53.398335 | 5.961903 | 52.223775 | C | 38.474803 | 6.724411  | 45.737657 |
| H | 17.068438 | 7.157720 | 63.836084 | C | 37.791298 | 6.641677  | 44.522368 |
| H | 15.148248 | 6.357173 | 65.155512 | N | 37.407494 | 7.456446  | 42.254036 |
| H | 10.261685 | 3.422800 | 63.797965 | H | 34.944632 | 9.662139  | 39.038696 |
| H | 32.688381 | 7.157760 | 63.835189 | H | 35.162962 | 7.510861  | 40.336302 |
| H | 30.768143 | 6.357166 | 65.154630 | H | 35.135745 | 7.673649  | 42.852096 |
| H | 25.878610 | 3.428454 | 63.795950 | H | 34.538323 | 11.286454 | 40.867609 |
| H | 48.307585 | 7.159051 | 63.833781 | H | 36.030410 | 11.751599 | 40.023232 |
| H | 46.387884 | 6.357377 | 65.153426 | H | 37.408102 | 10.630756 | 41.786577 |
| H | 41.497425 | 3.430417 | 63.794534 | H | 36.363703 | 11.863617 | 42.510288 |
| H | 54.922456 | 4.682824 | 55.325554 | H | 34.799890 | 10.184718 | 43.367765 |



|   |           |          |           |   |           |          |           |
|---|-----------|----------|-----------|---|-----------|----------|-----------|
| H | 36.416182 | 9.628941 | 43.797431 | O | 19.909908 | 3.365322 | 26.649695 |
| H | 36.601680 | 9.369757 | 39.611037 | C | 20.765802 | 4.295528 | 26.423042 |
| H | 39.441966 | 9.104105 | 42.819808 | C | 18.226927 | 4.022014 | 22.293999 |
| H | 40.654670 | 9.236522 | 44.984116 | C | 18.992915 | 2.941012 | 21.873981 |
| H | 40.040957 | 7.710842 | 46.869554 | C | 19.081890 | 2.638017 | 20.519979 |
| H | 38.197423 | 6.049380 | 46.553706 | C | 18.404876 | 3.417023 | 19.587993 |
| H | 36.991128 | 5.908934 | 44.383624 | C | 17.639888 | 4.497024 | 20.008011 |
| H | 37.937334 | 7.746245 | 41.432505 | C | 17.550913 | 4.800019 | 21.362013 |
| H | 36.886874 | 6.582822 | 42.077639 | C | 16.783924 | 5.881020 | 21.784030 |
|   |           |          |           | C | 16.107910 | 6.659026 | 20.850045 |
|   |           |          |           | C | 16.197885 | 6.355031 | 19.497042 |
|   |           |          |           | C | 16.963875 | 5.274030 | 19.076025 |
|   |           |          |           | O | 15.523872 | 7.185037 | 18.539057 |
|   |           |          |           | O | 18.564998 | 5.527682 | 24.115723 |
|   |           |          |           | O | 18.018812 | 3.386526 | 24.572728 |
|   |           |          |           | C | 18.263577 | 4.335524 | 23.746366 |
|   |           |          |           | C | 14.301000 | 5.801000 | 25.782000 |
|   |           |          |           | C | 13.829000 | 6.909000 | 26.476000 |
|   |           |          |           | C | 27.980146 | 7.119622 | 26.447788 |
|   |           |          |           | C | 27.138480 | 6.249298 | 25.763794 |
|   |           |          |           | C | 27.644945 | 5.112157 | 25.101249 |
|   |           |          |           | C | 29.040842 | 4.851704 | 25.151490 |
|   |           |          |           | C | 13.900000 | 3.935000 | 24.313000 |
|   |           |          |           | C | 28.703752 | 2.917540 | 23.721924 |
|   |           |          |           | C | 27.336854 | 3.136502 | 23.698327 |
|   |           |          |           | C | 26.782719 | 4.238423 | 24.387703 |
|   |           |          |           | O | 26.564737 | 2.220347 | 22.987043 |
|   |           |          |           | O | 16.596224 | 6.400478 | 25.854837 |
|   |           |          |           | O | 16.052946 | 4.260841 | 26.319692 |
|   |           |          |           | C | 15.735066 | 5.459816 | 25.986593 |
|   |           |          |           | C | 17.917683 | 5.794700 | 30.239899 |
|   |           |          |           | C | 18.908358 | 6.559867 | 30.881883 |
|   |           |          |           | C | 16.778272 | 5.366470 | 30.977729 |

(S,S)-1-Int1(QM(B3LYP)/MM)

|    |           |          |           |  |  |  |  |
|----|-----------|----------|-----------|--|--|--|--|
| C  | 12.487000 | 7.261000 | 26.395000 |  |  |  |  |
| C  | 11.616000 | 6.503000 | 25.622000 |  |  |  |  |
| C  | 12.086000 | 5.395000 | 24.927000 |  |  |  |  |
| C  | 13.428000 | 5.043000 | 25.007000 |  |  |  |  |
| C  | 13.027000 | 3.179000 | 23.539000 |  |  |  |  |
| C  | 11.685000 | 3.529000 | 23.460000 |  |  |  |  |
| C  | 11.215000 | 4.638000 | 24.154000 |  |  |  |  |
| O  | 10.782000 | 2.793000 | 22.654000 |  |  |  |  |
| Cu | 18.542064 | 6.080529 | 26.022368 |  |  |  |  |
| Cu | 17.947219 | 3.691609 | 26.527846 |  |  |  |  |
| C  | 22.212572 | 3.947077 | 26.393041 |  |  |  |  |
| C  | 22.748930 | 3.183035 | 27.445118 |  |  |  |  |
| C  | 24.104090 | 2.879635 | 27.487450 |  |  |  |  |
| C  | 24.947361 | 3.326438 | 26.475479 |  |  |  |  |
| C  | 24.448475 | 4.065368 | 25.385788 |  |  |  |  |
| C  | 23.061223 | 4.364534 | 25.329212 |  |  |  |  |
| C  | 22.555264 | 5.038987 | 24.197150 |  |  |  |  |
| C  | 23.409720 | 5.445804 | 23.177321 |  |  |  |  |
| C  | 24.776810 | 5.192898 | 23.251294 |  |  |  |  |
| C  | 25.307319 | 4.492968 | 24.343294 |  |  |  |  |
| O  | 25.618778 | 5.602616 | 22.223215 |  |  |  |  |
| O  | 20.431953 | 5.513392 | 26.197545 |  |  |  |  |

|    |           |          |           |    |           |          |           |
|----|-----------|----------|-----------|----|-----------|----------|-----------|
| C  | 15.702878 | 4.693486 | 30.359320 | O  | 33.645930 | 3.389463 | 24.592797 |
| C  | 14.607993 | 4.274134 | 31.108859 | C  | 33.872571 | 4.336743 | 23.754972 |
| O  | 18.427727 | 6.391683 | 27.985652 | C  | 29.888051 | 5.716260 | 25.898930 |
| O  | 17.895799 | 4.244827 | 28.431201 | C  | 29.342047 | 6.857590 | 26.513267 |
| C  | 18.095638 | 5.457175 | 28.801001 | C  | 43.547580 | 6.894018 | 26.507985 |
| Cu | 34.147958 | 6.094114 | 26.024557 | C  | 42.729074 | 6.032347 | 25.789132 |
| Cu | 33.592464 | 3.704626 | 26.562292 | C  | 43.256983 | 4.908687 | 25.119627 |
| C  | 37.847269 | 3.979770 | 26.407156 | C  | 44.654758 | 4.656989 | 25.193027 |
| C  | 38.374172 | 3.270733 | 27.502382 | C  | 29.555917 | 3.757911 | 24.426669 |
| C  | 39.718659 | 2.926222 | 27.550607 | C  | 44.355920 | 2.737106 | 23.737891 |
| C  | 40.561507 | 3.275625 | 26.501777 | C  | 42.988620 | 2.954856 | 23.680102 |
| C  | 40.073830 | 3.963186 | 25.374002 | C  | 42.413330 | 4.044860 | 24.371738 |
| C  | 38.696302 | 4.306911 | 25.313790 | O  | 42.237231 | 2.044508 | 22.940049 |
| C  | 38.199329 | 4.932581 | 24.151536 | O  | 32.179816 | 6.391754 | 25.912867 |
| C  | 39.053509 | 5.239098 | 23.096402 | O  | 31.691910 | 4.243236 | 26.394640 |
| C  | 40.413018 | 4.944073 | 23.171278 | C  | 31.338933 | 5.435379 | 26.078054 |
| C  | 40.936110 | 4.299836 | 24.301089 | C  | 33.640768 | 5.869413 | 30.255735 |
| O  | 41.254949 | 5.261896 | 22.111290 | C  | 34.662482 | 6.642493 | 30.837756 |
| O  | 36.055476 | 5.540390 | 26.161564 | C  | 32.495131 | 5.531092 | 31.030981 |
| O  | 35.553504 | 3.398272 | 26.662409 | C  | 31.405739 | 4.826106 | 30.478258 |
| C  | 36.400440 | 4.329425 | 26.415513 | C  | 30.292836 | 4.525362 | 31.259111 |
| C  | 33.846854 | 4.021972 | 22.293718 | O  | 34.079637 | 6.418051 | 27.983239 |
| C  | 34.612831 | 2.940969 | 21.873683 | O  | 33.563927 | 4.276541 | 28.470513 |
| C  | 34.701781 | 2.637978 | 20.519678 | C  | 33.771708 | 5.495145 | 28.819570 |
| C  | 34.024753 | 3.416989 | 19.587708 | Cu | 49.696207 | 6.203329 | 25.982178 |
| C  | 33.259776 | 4.496991 | 20.007741 | Cu | 49.345520 | 3.784539 | 26.559526 |
| C  | 33.170826 | 4.799983 | 21.361747 | C  | 53.571003 | 4.464792 | 26.367939 |
| C  | 32.403848 | 5.880986 | 21.783781 | C  | 54.157058 | 3.947774 | 27.515902 |
| C  | 31.727821 | 6.658997 | 20.849810 | C  | 55.530059 | 3.732759 | 27.559826 |
| C  | 31.817771 | 6.355005 | 19.496805 | C  | 56.316002 | 4.036762 | 26.454787 |
| C  | 32.583748 | 5.274002 | 19.075771 | C  | 55.729946 | 4.554780 | 25.305823 |
| O  | 31.143743 | 7.185016 | 18.538835 | C  | 54.356947 | 4.768795 | 25.262899 |
| O  | 34.146809 | 5.536207 | 24.119385 | C  | 53.770890 | 5.287813 | 24.113936 |

|   |           |          |           |    |           |          |           |
|---|-----------|----------|-----------|----|-----------|----------|-----------|
| C | 54.557834 | 5.591815 | 23.007897 | O  | 49.297075 | 4.384721 | 28.450293 |
| C | 55.929834 | 5.377800 | 23.052821 | C  | 49.384297 | 5.620896 | 28.783759 |
| C | 56.515889 | 4.858782 | 24.200784 | C  | 11.158286 | 7.260970 | 41.959133 |
| O | 56.643771 | 5.617805 | 21.841785 | C  | 10.287269 | 6.502976 | 41.186145 |
| O | 51.637476 | 5.836432 | 26.124492 | C  | 10.757253 | 5.394976 | 40.491133 |
| O | 51.335692 | 3.658417 | 26.632709 | C  | 12.099253 | 5.042971 | 40.571108 |
| C | 52.093213 | 4.665343 | 26.380149 | C  | 11.698221 | 3.178978 | 39.103109 |
| C | 49.466779 | 4.021876 | 22.293156 | C  | 10.356221 | 3.528983 | 39.024134 |
| C | 50.232745 | 2.940872 | 21.873104 | C  | 9.886237  | 4.637982 | 39.718146 |
| C | 50.321669 | 2.637885 | 20.519096 | O  | 9.453204  | 2.792989 | 38.218147 |
| C | 49.644627 | 3.416901 | 19.587140 | Cu | 17.243013 | 6.033945 | 41.521634 |
| C | 48.879661 | 4.496905 | 20.007192 | Cu | 16.619303 | 3.656045 | 42.037011 |
| C | 48.790737 | 4.799893 | 21.361200 | C  | 20.887972 | 3.848337 | 41.998496 |
| C | 48.023772 | 5.880897 | 21.783251 | C  | 21.365711 | 3.138864 | 43.115574 |
| C | 47.347731 | 6.658913 | 20.849295 | C  | 22.713077 | 2.822930 | 43.238416 |
| C | 47.437655 | 6.354926 | 19.496287 | C  | 23.608434 | 3.204708 | 42.245289 |
| C | 48.203620 | 5.273922 | 19.075235 | C  | 23.170312 | 3.884760 | 41.094257 |
| O | 46.763613 | 7.184943 | 18.538331 | C  | 21.790215 | 4.193652 | 40.954636 |
| O | 49.734582 | 5.590533 | 24.088811 | C  | 21.345638 | 4.809231 | 39.766488 |
| O | 49.387795 | 3.424520 | 24.605606 | C  | 22.252667 | 5.135869 | 38.762333 |
| C | 49.527206 | 4.368377 | 23.748376 | C  | 23.612243 | 4.876514 | 38.917853 |
| C | 45.482485 | 5.529388 | 25.952281 | C  | 24.081063 | 4.252924 | 40.078696 |
| C | 44.910377 | 6.648398 | 26.584950 | O  | 24.506115 | 5.218456 | 37.911267 |
| C | 45.189818 | 3.570614 | 24.473645 | O  | 19.132266 | 5.433603 | 41.686525 |
| O | 47.717877 | 6.334443 | 25.878937 | O  | 18.573218 | 3.301816 | 42.170457 |
| O | 47.395341 | 4.166344 | 26.410732 | C  | 19.445838 | 4.216786 | 41.950716 |
| C | 46.951283 | 5.326785 | 26.084032 | C  | 16.872029 | 4.007275 | 37.785787 |
| C | 49.195717 | 5.979744 | 30.215228 | C  | 17.554813 | 2.887105 | 37.279623 |
| C | 50.130373 | 6.832890 | 30.829281 | C  | 17.575735 | 2.622486 | 35.916580 |
| C | 48.094428 | 5.489627 | 30.971082 | C  | 16.912425 | 3.469682 | 35.035163 |
| C | 47.070967 | 4.720304 | 30.377368 | C  | 16.185221 | 4.584918 | 35.500484 |
| C | 46.012337 | 4.242998 | 31.143532 | C  | 16.145325 | 4.845304 | 36.896228 |
| O | 49.603766 | 6.560709 | 27.937695 | C  | 15.355657 | 5.912903 | 37.368465 |

|   |           |          |           |    |           |          |           |
|---|-----------|----------|-----------|----|-----------|----------|-----------|
| C | 14.666670 | 6.725105 | 36.477110 | O  | 16.578390 | 4.219455 | 43.942436 |
| C | 14.732064 | 6.509394 | 35.110809 | C  | 16.810425 | 5.429026 | 44.305317 |
| C | 15.497546 | 5.438018 | 34.597269 | Cu | 32.459286 | 7.509872 | 41.544564 |
| O | 14.037063 | 7.403286 | 34.298897 | Cu | 32.543275 | 4.525281 | 42.155883 |
| O | 17.247001 | 5.481777 | 39.615897 | C  | 36.576495 | 3.524051 | 41.835269 |
| O | 16.694726 | 3.342406 | 40.071033 | C  | 37.030208 | 2.579579 | 42.735766 |
| C | 16.944811 | 4.291488 | 39.243740 | C  | 38.374950 | 2.140998 | 42.686433 |
| C | 12.972270 | 5.800966 | 41.346096 | C  | 39.250813 | 2.655516 | 41.754913 |
| C | 12.500286 | 6.908965 | 42.040108 | C  | 38.820375 | 3.600380 | 40.766107 |
| C | 26.454854 | 7.138290 | 42.256699 | C  | 37.438131 | 4.001542 | 40.788667 |
| C | 25.703779 | 6.184055 | 41.604597 | C  | 36.964174 | 4.844716 | 39.742004 |
| C | 26.303452 | 5.044449 | 40.976266 | C  | 37.807376 | 5.307304 | 38.758128 |
| C | 27.735279 | 4.902658 | 41.084382 | C  | 39.191527 | 4.990792 | 38.782104 |
| C | 12.571237 | 3.934972 | 39.877096 | C  | 39.699522 | 4.149126 | 39.771334 |
| C | 27.602217 | 2.846559 | 39.785253 | O  | 40.022685 | 5.515897 | 37.840775 |
| C | 26.195017 | 2.987726 | 39.656170 | O  | 35.150122 | 5.410279 | 41.995493 |
| C | 25.541050 | 4.065550 | 40.242559 | O  | 34.222614 | 3.418874 | 42.273068 |
| O | 25.612383 | 1.985806 | 38.931462 | C  | 35.221214 | 4.148308 | 42.040372 |
| O | 15.288206 | 6.384364 | 41.380006 | C  | 32.613696 | 4.958618 | 37.957098 |
| O | 14.729794 | 4.249863 | 41.843719 | C  | 33.285906 | 3.798807 | 37.601754 |
| C | 14.415577 | 5.454523 | 41.527990 | C  | 33.327915 | 3.381336 | 36.256894 |
| C | 16.662027 | 5.783449 | 45.743674 | C  | 32.667433 | 4.099810 | 35.283412 |
| C | 17.684327 | 6.527059 | 46.361777 | C  | 31.925645 | 5.285987 | 35.591142 |
| C | 18.816757 | 6.854537 | 32.236074 | C  | 31.916030 | 5.728345 | 36.965359 |
| C | 17.730877 | 6.395839 | 32.973579 | C  | 31.165125 | 6.896097 | 37.290371 |
| C | 16.699768 | 5.653366 | 32.366555 | C  | 30.453055 | 7.569376 | 36.331482 |
| C | 15.513796 | 5.413604 | 46.498531 | C  | 30.453794 | 7.139886 | 34.978359 |
| C | 14.415013 | 4.756651 | 45.905253 | C  | 31.195233 | 6.027278 | 34.593527 |
| C | 13.309336 | 4.399466 | 46.671093 | O  | 29.698557 | 7.932459 | 34.159260 |
| C | 14.551388 | 4.510872 | 32.479931 | O  | 32.688970 | 6.531613 | 39.762030 |
| C | 15.584524 | 5.209181 | 33.119142 | O  | 32.606866 | 4.329651 | 40.214239 |
| O | 13.450131 | 4.088265 | 33.216130 | C  | 32.626100 | 5.320795 | 39.420015 |
| O | 17.153634 | 6.351922 | 43.482557 | C  | 28.490986 | 5.925198 | 41.750808 |

|    |           |          |           |   |           |          |           |
|----|-----------|----------|-----------|---|-----------|----------|-----------|
| C  | 27.857461 | 7.024936 | 42.307901 | C | 54.401203 | 4.554604 | 40.869180 |
| C  | 42.190278 | 6.788677 | 42.036143 | C | 53.028203 | 4.768624 | 40.826281 |
| C  | 41.398849 | 5.902122 | 41.315601 | C | 52.442128 | 5.287648 | 39.677330 |
| C  | 41.969028 | 4.825094 | 40.605404 | C | 53.229054 | 5.591652 | 38.571278 |
| C  | 43.375939 | 4.633680 | 40.656690 | C | 54.601054 | 5.377632 | 38.616177 |
| C  | 28.348601 | 3.771622 | 40.469337 | C | 55.187129 | 4.858609 | 39.764128 |
| C  | 43.139060 | 2.733969 | 39.162261 | O | 55.314970 | 5.617639 | 37.405129 |
| C  | 41.764656 | 2.898158 | 39.121936 | O | 50.322862 | 5.864131 | 41.715183 |
| C  | 41.161972 | 3.949319 | 39.839223 | O | 50.009954 | 3.676755 | 42.177754 |
| O  | 41.037953 | 1.985643 | 38.362543 | C | 50.770735 | 4.683626 | 41.948576 |
| O  | 30.566764 | 7.021205 | 41.689386 | C | 48.265460 | 4.230643 | 37.807180 |
| O  | 30.583523 | 4.815929 | 42.077070 | C | 49.056218 | 3.180051 | 37.308562 |
| C  | 29.990358 | 5.909699 | 41.837860 | C | 49.125109 | 2.925151 | 35.945563 |
| C  | 32.291725 | 6.663986 | 45.799764 | C | 48.403157 | 3.712410 | 35.055355 |
| C  | 33.076052 | 7.614779 | 46.428435 | C | 47.574952 | 4.759416 | 35.510243 |
| C  | 34.584952 | 7.051483 | 32.161781 | C | 47.488923 | 5.010812 | 36.905938 |
| C  | 33.478922 | 6.708048 | 32.928857 | C | 46.605461 | 6.008733 | 37.364848 |
| C  | 32.421567 | 5.953265 | 32.387062 | C | 45.873379 | 6.769019 | 36.462164 |
| C  | 31.258670 | 5.978454 | 46.526710 | C | 45.977146 | 6.560520 | 35.097261 |
| C  | 30.365896 | 5.060556 | 45.901266 | C | 46.829889 | 5.551147 | 34.596514 |
| C  | 29.354850 | 4.456813 | 46.609335 | O | 45.227206 | 7.397895 | 34.274035 |
| C  | 30.231319 | 4.915528 | 32.594668 | O | 48.442755 | 5.719723 | 39.655900 |
| C  | 31.285045 | 5.635703 | 33.166342 | O | 48.141897 | 3.526249 | 40.086344 |
| O  | 29.103314 | 4.627953 | 33.352353 | C | 48.285284 | 4.506579 | 39.269369 |
| O  | 32.749906 | 7.357209 | 43.576493 | C | 44.173444 | 5.521657 | 41.430812 |
| O  | 32.581900 | 5.152205 | 44.011973 | C | 43.563128 | 6.603628 | 42.089584 |
| C  | 32.552719 | 6.375918 | 44.342556 | C | 43.947837 | 3.587442 | 39.904791 |
| Cu | 48.380833 | 6.247323 | 41.566247 | O | 46.398861 | 6.371793 | 41.443832 |
| Cu | 48.032691 | 3.807326 | 42.056671 | O | 46.091584 | 4.178232 | 41.870891 |
| C  | 52.242278 | 4.464620 | 41.931334 | C | 45.641702 | 5.345017 | 41.584888 |
| C  | 52.828353 | 3.947597 | 43.079285 | C | 47.837680 | 5.909718 | 45.778391 |
| C  | 54.201353 | 3.732577 | 43.123183 | C | 48.785339 | 6.740818 | 46.403653 |
| C  | 54.987278 | 4.036581 | 42.018131 | C | 50.021186 | 7.159750 | 32.175077 |

|    |           |          |           |   |           |          |           |
|----|-----------|----------|-----------|---|-----------|----------|-----------|
| C  | 48.974017 | 6.644035 | 32.931472 | O | 17.310097 | 3.436910 | 57.666233 |
| C  | 47.999564 | 5.809265 | 32.351493 | C | 18.148566 | 4.390516 | 57.478883 |
| C  | 46.710213 | 5.456301 | 46.517830 | C | 15.652147 | 4.232425 | 53.323942 |
| C  | 45.680298 | 4.704426 | 45.914550 | C | 16.363528 | 3.128180 | 52.821492 |
| C  | 44.592534 | 4.269250 | 46.666049 | C | 16.397400 | 2.861384 | 51.460279 |
| C  | 45.943279 | 4.512608 | 32.507700 | C | 15.714708 | 3.687646 | 50.575462 |
| C  | 46.924425 | 5.302405 | 33.122278 | C | 14.966991 | 4.792417 | 51.033869 |
| O  | 44.882113 | 4.025215 | 33.262540 | C | 14.921944 | 5.061356 | 52.428559 |
| O  | 48.267165 | 6.535839 | 43.526120 | C | 14.120027 | 6.123212 | 52.892385 |
| O  | 47.928648 | 4.349381 | 43.970276 | C | 13.423037 | 6.921305 | 51.993945 |
| C  | 48.027598 | 5.575371 | 44.341179 | C | 13.486260 | 6.692272 | 50.629361 |
| C  | 9.830848  | 7.260896 | 57.522290 | C | 14.260586 | 5.623248 | 50.124073 |
| C  | 8.959816  | 6.502907 | 56.749315 | O | 12.780784 | 7.571781 | 49.810771 |
| C  | 9.429783  | 5.394908 | 56.054291 | O | 15.942045 | 5.667824 | 55.207808 |
| C  | 10.771783 | 5.042898 | 56.134241 | O | 15.437633 | 3.500473 | 55.578762 |
| C  | 10.370718 | 3.178911 | 54.666243 | C | 15.678699 | 4.482766 | 54.789496 |
| C  | 9.028718  | 3.528920 | 54.587293 | C | 11.644816 | 5.800887 | 56.909216 |
| C  | 8.558750  | 4.637919 | 55.281317 | C | 11.172849 | 6.908886 | 57.603240 |
| O  | 8.125684  | 2.792932 | 53.781319 | C | 25.322401 | 7.127325 | 57.581508 |
| Cu | 15.890397 | 6.147174 | 57.136455 | C | 24.485292 | 6.302940 | 56.838901 |
| Cu | 15.344831 | 3.731065 | 57.550413 | C | 24.994197 | 5.204482 | 56.115362 |
| C  | 19.598985 | 4.063477 | 57.432661 | C | 26.389901 | 4.940643 | 56.156181 |
| C  | 20.152657 | 3.288754 | 58.467735 | C | 11.243751 | 3.934900 | 55.440217 |
| C  | 21.506744 | 2.978888 | 58.480480 | C | 26.058004 | 3.095396 | 54.613098 |
| C  | 22.331304 | 3.429764 | 57.455183 | C | 24.690584 | 3.314296 | 54.598966 |
| C  | 21.815296 | 4.185290 | 56.384688 | C | 24.133610 | 4.372656 | 55.351762 |
| C  | 20.429044 | 4.493287 | 56.359718 | O | 23.920401 | 2.436635 | 53.838798 |
| C  | 19.904893 | 5.188060 | 55.248653 | O | 13.936125 | 6.435445 | 56.975443 |
| C  | 20.741215 | 5.602701 | 54.216940 | O | 13.436791 | 4.272392 | 57.370514 |
| C  | 22.107951 | 5.340496 | 54.259968 | C | 13.091269 | 5.476595 | 57.085756 |
| C  | 22.656200 | 4.622385 | 55.331307 | C | 15.283046 | 5.695821 | 61.352095 |
| O  | 22.932362 | 5.761724 | 53.222654 | C | 16.314087 | 6.385804 | 61.978046 |
| O  | 17.793319 | 5.610739 | 57.300991 | C | 17.610136 | 6.863328 | 47.706944 |

|    |           |          |           |   |           |          |           |
|----|-----------|----------|-----------|---|-----------|----------|-----------|
| C  | 16.510160 | 6.469238 | 48.459809 | C | 29.649590 | 6.144618 | 52.896728 |
| C  | 15.451314 | 5.745538 | 47.878514 | C | 28.931458 | 6.933031 | 52.004517 |
| C  | 14.198081 | 5.242825 | 62.095148 | C | 29.042852 | 6.754979 | 50.635167 |
| C  | 13.166040 | 4.552842 | 61.469196 | C | 29.888703 | 5.751565 | 50.123132 |
| C  | 12.083075 | 4.099846 | 62.213249 | O | 28.306152 | 7.612222 | 49.822591 |
| C  | 13.266798 | 4.680279 | 48.034502 | O | 31.507464 | 5.734172 | 55.207858 |
| C  | 14.325714 | 5.362449 | 48.649012 | O | 31.060090 | 3.550104 | 55.553298 |
| O  | 12.156365 | 4.315187 | 48.787569 | C | 31.275751 | 4.548227 | 54.775572 |
| O  | 15.755561 | 6.383546 | 59.110205 | C | 27.232670 | 5.758586 | 56.958459 |
| O  | 15.282114 | 4.209199 | 59.476422 | C | 26.682546 | 6.858767 | 57.640677 |
| C  | 15.446218 | 5.412772 | 59.892355 | C | 40.917052 | 6.949472 | 57.660899 |
| Cu | 31.479603 | 6.183908 | 57.142790 | C | 40.090146 | 6.146656 | 56.886357 |
| Cu | 30.963674 | 3.756722 | 57.531748 | C | 40.606870 | 5.065843 | 56.141684 |
| C  | 35.209588 | 4.106187 | 57.432284 | C | 42.003494 | 4.801529 | 56.188773 |
| C  | 35.749223 | 3.356113 | 58.493165 | C | 26.908019 | 3.892121 | 55.369755 |
| C  | 37.094719 | 3.012824 | 58.513374 | C | 41.684233 | 2.987675 | 54.608230 |
| C  | 37.925245 | 3.403344 | 57.469105 | C | 40.317001 | 3.211437 | 54.580409 |
| C  | 37.425120 | 4.137019 | 56.376113 | C | 39.752453 | 4.255882 | 55.347474 |
| C  | 36.046931 | 4.481907 | 56.345674 | O | 39.554231 | 2.348927 | 53.795926 |
| C  | 35.537211 | 5.157571 | 55.217476 | O | 29.512343 | 6.456282 | 57.023787 |
| C  | 36.380477 | 5.514900 | 54.169776 | O | 29.054203 | 4.274134 | 57.363064 |
| C  | 37.740592 | 5.217408 | 54.216581 | C | 28.685283 | 5.479600 | 57.121779 |
| C  | 38.275369 | 4.519637 | 55.308619 | C | 30.903120 | 5.695641 | 61.351269 |
| O  | 38.571657 | 5.587807 | 53.165264 | C | 31.934175 | 6.385618 | 61.977205 |
| O  | 33.396018 | 5.653782 | 57.272494 | C | 32.914281 | 7.876062 | 47.807257 |
| O  | 32.926284 | 3.478401 | 57.646721 | C | 31.952684 | 7.212455 | 48.538031 |
| C  | 33.758795 | 4.435534 | 57.459245 | C | 31.076249 | 6.255229 | 47.930468 |
| C  | 31.266694 | 4.320785 | 53.305746 | C | 29.818167 | 5.242646 | 62.094340 |
| C  | 32.043604 | 3.270620 | 52.785296 | C | 28.786113 | 4.552669 | 61.468405 |
| C  | 32.129614 | 3.058683 | 51.416004 | C | 27.703159 | 4.099675 | 62.212476 |
| C  | 31.436018 | 3.887230 | 50.541179 | C | 29.184751 | 4.702960 | 47.996734 |
| C  | 30.613776 | 4.927798 | 51.017788 | C | 30.036006 | 5.583797 | 48.660646 |
| C  | 30.516260 | 5.141380 | 52.419239 | O | 28.187393 | 4.072458 | 48.677576 |

|    |           |          |           |   |           |          |           |
|----|-----------|----------|-----------|---|-----------|----------|-----------|
| O  | 31.373430 | 6.396350 | 59.117292 | C | 42.839783 | 5.611177 | 57.005380 |
| O  | 30.898497 | 4.219066 | 59.464197 | C | 42.277255 | 6.686339 | 57.718432 |
| C  | 31.063964 | 5.419555 | 59.890482 | C | 42.528200 | 3.767049 | 55.390141 |
| Cu | 47.052260 | 6.252187 | 57.150116 | O | 45.079252 | 6.403789 | 57.026009 |
| Cu | 46.687198 | 3.795911 | 57.532788 | O | 44.742205 | 4.197161 | 57.349591 |
| C  | 50.914829 | 4.464394 | 57.493750 | C | 44.306382 | 5.385469 | 57.127423 |
| C  | 51.500923 | 3.947364 | 58.641689 | C | 46.523195 | 5.695406 | 61.350162 |
| C  | 52.873923 | 3.732339 | 58.685563 | C | 47.554262 | 6.385378 | 61.976082 |
| C  | 53.659830 | 4.036343 | 57.580498 | C | 48.657721 | 7.090023 | 47.741150 |
| C  | 53.073736 | 4.554373 | 56.431559 | C | 47.578867 | 6.618698 | 48.479608 |
| C  | 51.700736 | 4.768398 | 56.388685 | C | 46.595952 | 5.799091 | 47.891828 |
| C  | 51.114643 | 5.287428 | 55.239746 | C | 45.438253 | 5.242413 | 62.093251 |
| C  | 51.901549 | 5.591433 | 54.133681 | C | 44.406185 | 4.552442 | 61.467332 |
| C  | 53.273549 | 5.377407 | 54.178555 | C | 43.323243 | 4.099449 | 62.211421 |
| C  | 53.859642 | 4.858378 | 55.326493 | C | 44.505411 | 4.557670 | 48.026091 |
| O  | 53.987445 | 5.617415 | 52.967495 | C | 45.495717 | 5.328579 | 48.650595 |
| O  | 48.992300 | 5.859213 | 57.298653 | O | 43.416732 | 4.109569 | 48.765456 |
| O  | 48.672561 | 3.655715 | 57.669604 | O | 46.923904 | 6.443859 | 59.124003 |
| C  | 49.438153 | 4.672522 | 57.497654 | O | 46.572623 | 4.240033 | 59.461004 |
| C  | 46.972566 | 4.361411 | 53.316596 | C | 46.675850 | 5.444278 | 59.890723 |
| C  | 47.814380 | 3.356097 | 52.808132 | C | 16.262162 | 6.620790 | 63.347051 |
| C  | 47.867321 | 3.091707 | 51.447276 | C | 15.179196 | 6.168795 | 64.090104 |
| C  | 47.077353 | 3.823500 | 50.568785 | C | 14.147156 | 5.478812 | 63.465153 |
| C  | 46.207135 | 4.832648 | 51.032648 | C | 12.031150 | 4.336833 | 63.582254 |
| C  | 46.141208 | 5.095391 | 52.427589 | C | 13.063191 | 5.025817 | 64.207206 |
| C  | 45.222182 | 6.053438 | 52.898734 | O | 10.943187 | 3.908837 | 64.361307 |
| C  | 44.427212 | 6.761547 | 52.006031 | C | 31.882275 | 6.620600 | 63.346211 |
| C  | 44.508217 | 6.543125 | 50.640341 | C | 30.799322 | 6.168606 | 64.089282 |
| C  | 45.401557 | 5.574571 | 50.127727 | C | 29.767267 | 5.478629 | 63.464346 |
| O  | 43.704593 | 7.339603 | 49.827044 | C | 27.651260 | 4.336658 | 63.581482 |
| O  | 47.120465 | 5.803775 | 55.212503 | C | 28.683314 | 5.025635 | 64.206417 |
| O  | 46.815244 | 3.595618 | 55.561543 | O | 26.563309 | 3.908663 | 64.360554 |
| C  | 46.968622 | 4.603015 | 54.782978 | C | 47.502389 | 6.620356 | 63.345091 |



|   |           |          |           |   |           |          |           |
|---|-----------|----------|-----------|---|-----------|----------|-----------|
| C | 46.419447 | 6.168363 | 64.088179 | H | 37.149843 | 5.183028 | 24.035944 |
| C | 45.387379 | 5.478391 | 63.463260 | H | 38.648900 | 5.718902 | 22.215532 |
| C | 43.271369 | 4.336426 | 63.580429 | H | 35.150109 | 2.329245 | 22.590639 |
| C | 44.303437 | 5.025398 | 64.205349 | H | 35.298700 | 1.793666 | 20.190363 |
| O | 42.183431 | 3.908432 | 64.359519 | H | 34.099976 | 3.170644 | 18.536496 |
| H | 12.119242 | 8.126995 | 26.935874 | H | 32.263410 | 6.143093 | 22.826042 |
| H | 10.573019 | 6.786791 | 25.566449 | H | 31.124682 | 7.499393 | 21.165272 |
| H | 13.383855 | 2.323457 | 22.982289 | H | 29.982566 | 7.537660 | 27.063174 |
| H | 9.847407  | 3.169602 | 22.677258 | H | 43.122321 | 7.760382 | 27.004958 |
| H | 22.106177 | 2.836646 | 28.246458 | H | 41.674381 | 6.263536 | 25.746865 |
| H | 24.505424 | 2.299585 | 28.312715 | H | 30.616989 | 3.542437 | 24.376975 |
| H | 25.997890 | 3.077287 | 26.542984 | H | 44.773941 | 1.901280 | 23.192951 |
| H | 21.498322 | 5.249403 | 24.074344 | H | 35.526575 | 6.930826 | 30.249987 |
| H | 22.998205 | 5.965215 | 22.322476 | H | 31.388817 | 4.511034 | 29.440119 |
| H | 19.532004 | 2.329497 | 22.589957 | H | 29.468560 | 3.985836 | 30.811841 |
| H | 19.679371 | 1.794099 | 20.190540 | H | 31.291991 | 6.861049 | 17.596337 |
| H | 18.480526 | 3.170838 | 18.536732 | H | 40.773719 | 5.755847 | 21.374705 |
| H | 16.652073 | 6.145520 | 22.827187 | H | 41.255816 | 2.264181 | 22.926097 |
| H | 15.507041 | 7.501063 | 21.165268 | H | 53.551995 | 3.699821 | 28.381166 |
| H | 14.495515 | 7.507892 | 27.087929 | H | 55.987720 | 3.326011 | 28.455679 |
| H | 27.571963 | 7.998732 | 26.936655 | H | 57.384067 | 3.866269 | 26.497798 |
| H | 26.083430 | 6.483185 | 25.740715 | H | 52.703455 | 5.452266 | 24.014537 |
| H | 14.941560 | 3.634300 | 24.310742 | H | 54.081110 | 5.976016 | 22.116804 |
| H | 29.107102 | 2.076019 | 23.174706 | H | 50.777751 | 2.334988 | 22.589241 |
| H | 19.766955 | 6.914843 | 30.323173 | H | 50.920901 | 1.795276 | 20.189738 |
| H | 15.682332 | 4.495159 | 29.293088 | H | 49.720330 | 3.170943 | 18.535917 |
| H | 13.798118 | 3.756926 | 30.612430 | H | 47.863492 | 6.134720 | 22.823895 |
| H | 15.672239 | 6.861303 | 17.596367 | H | 46.741191 | 7.496785 | 21.164950 |
| H | 25.128454 | 6.120430 | 21.509501 | H | 45.535222 | 7.334583 | 27.145286 |
| H | 25.582950 | 2.438720 | 22.999177 | H | 46.251893 | 3.354213 | 24.456035 |
| H | 37.729852 | 2.990482 | 28.328013 | H | 50.957597 | 7.234051 | 30.254815 |
| H | 40.110815 | 2.384717 | 28.405951 | H | 47.063735 | 4.488082 | 29.317818 |
| H | 41.602490 | 2.990316 | 26.571509 | H | 45.241726 | 3.652996 | 30.666093 |

|                                |                                |
|--------------------------------|--------------------------------|
| H 46.912592 6.861526 17.595779 | H 35.907458 5.112884 39.700451 |
| H 56.056075 5.976781 21.104036 | H 37.410857 5.933934 37.950288 |
| H 10.790832 8.127534 42.499202 | H 33.775329 3.210212 38.380882 |
| H 9.244421 6.786966 41.130117  | H 33.874796 2.472183 35.986740 |
| H 12.055769 2.325581 38.543425 | H 32.708140 3.729417 34.253686 |
| H 8.519519 3.171553 38.239287  | H 31.154561 7.251726 38.319379 |
| H 20.683013 2.846371 43.905430 | H 29.863112 8.455114 36.582842 |
| H 23.068151 2.285290 44.112254 | H 28.459597 7.800751 42.785762 |
| H 24.652866 2.950042 42.375951 | H 41.739639 7.624568 42.558512 |
| H 20.297496 5.031405 39.590743 | H 40.331841 6.074380 41.304404 |
| H 21.888258 5.604154 37.857782 | H 29.428274 3.644692 40.542336 |
| H 18.086900 2.225000 37.953007 | H 43.585630 1.929671 38.591963 |
| H 18.114656 1.759188 35.538861 | H 33.829198 8.155229 45.849343 |
| H 16.955545 3.233834 33.981196 | H 35.382535 7.646971 32.595185 |
| H 15.245008 6.128960 38.424959 | H 33.447949 7.054462 33.953964 |
| H 14.066256 7.544955 36.848135 | H 30.479396 4.831583 44.842199 |
| H 13.169303 7.508117 42.648621 | H 28.673221 3.765541 46.099280 |
| H 25.960927 7.997313 42.722146 | H 28.444566 4.044431 32.857545 |
| H 24.618677 6.324580 41.569578 | H 29.597101 7.558714 33.270367 |
| H 13.612453 3.635511 39.864336 | H 39.513548 6.056304 37.214661 |
| H 28.072657 1.983709 39.306097 | H 40.045578 2.167197 38.361356 |
| H 18.551326 6.837821 45.789746 | H 52.223693 3.702129 43.945489 |
| H 19.595277 7.436570 32.719591 | H 54.659164 3.326263 44.019143 |
| H 17.694555 6.639438 34.026889 | H 56.055355 3.866084 42.060983 |
| H 14.385870 4.521434 44.846725 | H 51.374885 5.455171 39.580474 |
| H 12.480744 3.893888 46.193964 | H 52.752391 5.976183 37.680204 |
| H 12.789237 3.571854 32.655305 | H 49.636250 2.566247 37.988273 |
| H 14.108101 7.183368 33.320112 | H 49.746574 2.115994 35.574847 |
| H 24.063901 5.721848 37.156418 | H 48.484685 3.484184 34.002045 |
| H 24.658567 2.117895 38.815465 | H 46.453530 6.209565 38.418865 |
| H 36.351046 2.204044 43.506060 | H 45.203872 7.538171 36.823218 |
| H 38.728164 1.401664 43.412367 | H 44.165301 7.300240 42.662273 |
| H 40.291647 2.316723 41.763836 | H 45.018767 3.419748 39.863844 |

|                                |                                |
|--------------------------------|--------------------------------|
| H 49.632164 7.116747 45.840713 | H 12.860212 7.349160 48.833214 |
| H 50.755403 7.812537 32.636912 | H 22.432689 6.294015 52.526136 |
| H 48.921308 6.915238 33.977340 | H 22.939950 2.660388 53.851558 |
| H 45.693124 4.451948 44.859547 | H 35.112863 3.039234 59.311587 |
| H 43.815688 3.692879 46.182059 | H 37.496707 2.438000 59.341868 |
| H 44.259999 3.444723 32.720147 | H 38.966761 3.115170 57.514937 |
| H 45.339091 7.191959 33.295823 | H 34.486314 5.410706 55.123532 |
| H 54.726381 5.971166 36.665340 | H 35.966752 6.035198 53.316539 |
| H 9.463387 8.127085 58.062879  | H 32.599222 2.622728 53.453676 |
| H 7.916958 6.786743 56.693476  | H 32.741182 2.250000 51.028236 |
| H 10.728259 2.325438 54.106703 | H 31.532082 3.693493 49.480979 |
| H 7.191826 3.170993 53.803015  | H 29.501775 6.325957 53.956209 |
| H 19.522913 2.933429 59.275350 | H 28.267686 7.701536 52.378808 |
| H 21.921150 2.387013 59.290635 | H 27.319482 7.502117 58.236977 |
| H 23.380750 3.170868 57.496878 | H 40.500202 7.782371 58.218461 |
| H 18.847623 5.410329 55.152731 | H 39.037658 6.389722 56.862214 |
| H 20.316282 6.136584 53.377710 | H 27.969383 3.679687 55.312132 |
| H 16.901881 2.474701 53.498471 | H 42.094500 2.190696 54.002636 |
| H 16.956322 2.008799 51.087354 | H 32.787625 6.740871 61.409715 |
| H 15.762957 3.444296 49.523684 | H 33.556109 8.614515 48.298541 |
| H 14.007585 6.347376 53.946964 | H 31.853015 7.441326 49.603831 |
| H 12.815729 7.739220 52.357935 | H 28.750120 4.374425 60.399947 |
| H 11.840337 7.509399 58.212420 | H 26.897830 3.574378 61.718420 |
| H 24.912277 7.975631 58.120349 | H 27.700041 3.489047 48.073133 |
| H 23.431687 6.542696 56.820172 | H 28.415329 7.418603 48.838375 |
| H 12.285139 3.636324 55.427456 | H 38.083637 6.117921 52.459067 |
| H 26.463239 2.288482 54.017200 | H 38.572147 2.564584 53.815283 |
| H 17.168177 6.739785 61.410653 | H 50.894942 3.700101 59.506355 |
| H 18.411372 7.430619 48.170505 | H 53.331585 3.325563 59.581324 |
| H 16.486051 6.747251 49.504796 | H 54.727864 3.865765 57.623183 |
| H 13.129795 4.375329 60.400592 | H 50.047687 5.459167 55.145063 |
| H 11.277963 3.574260 61.719266 | H 51.424948 5.976966 53.242994 |
| H 11.478669 3.799856 48.246122 | H 48.436025 2.776064 53.480777 |

|   |           |          |           |   |           |           |           |
|---|-----------|----------|-----------|---|-----------|-----------|-----------|
| H | 48.522743 | 2.312934 | 51.070069 | H | 44.238642 | 5.198811  | 65.267058 |
| H | 47.141257 | 3.580805 | 49.517908 | H | 48.273932 | 5.043138  | 18.026054 |
| H | 45.094768 | 6.263391 | 53.954957 | C | 35.713412 | 8.368786  | 42.433970 |
| H | 43.728181 | 7.499713 | 52.376024 | C | 35.047466 | 8.408945  | 41.022639 |
| H | 42.907836 | 7.323557 | 58.328122 | C | 35.827732 | 9.314768  | 40.041054 |
| H | 43.589613 | 3.551448 | 55.344777 | C | 36.127060 | 10.703875 | 40.611627 |
| H | 48.405769 | 6.744571 | 61.408026 | C | 36.917524 | 10.583505 | 41.921697 |
| H | 49.398881 | 7.730509 | 48.209056 | C | 36.138747 | 9.745052  | 42.946341 |
| H | 47.509407 | 6.912678 | 49.518208 | O | 33.746572 | 8.825188  | 41.176717 |
| H | 44.381351 | 4.364342 | 60.399446 | C | 37.569455 | 7.112291  | 43.656864 |
| H | 42.519324 | 3.571614 | 61.717768 | C | 38.881054 | 7.570525  | 43.790430 |
| H | 42.802324 | 3.518243 | 48.225973 | C | 39.569815 | 7.348823  | 44.987382 |
| H | 43.811520 | 7.134248 | 48.848911 | C | 38.942144 | 6.681716  | 46.044001 |
| H | 53.398987 | 5.972009 | 52.228096 | C | 37.624416 | 6.232133  | 45.900252 |
| H | 17.068213 | 7.158096 | 63.835984 | C | 36.931267 | 6.441181  | 44.704902 |
| H | 15.148085 | 6.357277 | 65.155549 | N | 36.839238 | 7.327726  | 42.409442 |
| H | 10.263136 | 3.421945 | 63.796951 | H | 35.231910 | 9.377081  | 39.114404 |
| H | 32.688048 | 7.158310 | 63.835081 | H | 35.086633 | 7.382843  | 40.600434 |
| H | 30.767943 | 6.357255 | 65.154675 | H | 34.972656 | 7.930723  | 43.115923 |
| H | 25.881451 | 3.424973 | 63.795497 | H | 35.171939 | 11.225098 | 40.806880 |
| H | 48.307548 | 7.159053 | 63.833809 | H | 36.684779 | 11.312044 | 39.875907 |
| H | 46.387778 | 6.357268 | 65.153513 | H | 37.908965 | 10.125489 | 41.716121 |
| H | 41.501276 | 3.424928 | 63.794586 | H | 37.130319 | 11.580570 | 42.347806 |
| H | 54.922583 | 4.682812 | 55.325861 | H | 35.193499 | 10.266188 | 43.180154 |
| H | 56.250108 | 4.683064 | 39.763631 | H | 36.689908 | 9.655577  | 43.900060 |
| H | 57.578890 | 4.683389 | 24.200599 | H | 36.785385 | 8.818774  | 39.766877 |
| H | 32.654242 | 5.043334 | 18.026542 | H | 39.360645 | 8.102050  | 42.962307 |
| H | 17.034872 | 5.043599 | 18.026693 | H | 40.600662 | 7.700188  | 45.093269 |
| H | 10.176559 | 4.915326 | 24.089696 | H | 39.481095 | 6.511027  | 46.981111 |
| H | 8.848026  | 4.915631 | 39.653295 | H | 37.127863 | 5.706871  | 46.721498 |
| H | 7.520592  | 4.915631 | 55.216369 | H | 35.907408 | 6.077603  | 44.583498 |
| H | 12.998951 | 5.199019 | 65.269014 | H | 37.497106 | 7.539004  | 41.650586 |
| H | 28.618711 | 5.199030 | 65.268140 | H | 36.294483 | 6.411211  | 42.145748 |

(S,S)-2-RC (QM(B3LYP)/MM)

|    |           |          |           |    |           |          |           |
|----|-----------|----------|-----------|----|-----------|----------|-----------|
| C  | 12.487000 | 7.261000 | 26.395000 | C  | 16.107910 | 6.659026 | 20.850045 |
| C  | 11.616000 | 6.503000 | 25.622000 | C  | 16.197885 | 6.355032 | 19.497042 |
| C  | 12.086000 | 5.395000 | 24.927000 | C  | 16.963876 | 5.274031 | 19.076025 |
| C  | 13.428000 | 5.043000 | 25.007000 | O  | 15.523872 | 7.185038 | 18.539057 |
| C  | 13.027000 | 3.179000 | 23.539000 | O  | 18.566160 | 5.531975 | 24.109278 |
| C  | 11.685000 | 3.529000 | 23.460000 | O  | 18.022622 | 3.391855 | 24.574856 |
| C  | 11.215000 | 4.638000 | 24.154000 | C  | 18.265636 | 4.338367 | 23.744981 |
| O  | 10.782000 | 2.793000 | 22.654000 | C  | 14.301000 | 5.801000 | 25.782000 |
| Cu | 18.543242 | 6.092843 | 26.011721 | C  | 13.829000 | 6.909000 | 26.476000 |
| Cu | 17.953498 | 3.705068 | 26.528957 | C  | 27.985250 | 7.030605 | 26.562809 |
| C  | 22.216638 | 3.963953 | 26.382491 | C  | 27.143719 | 6.198415 | 25.833116 |
| C  | 22.751099 | 3.187946 | 27.426893 | C  | 27.647156 | 5.086055 | 25.127366 |
| C  | 24.103972 | 2.874687 | 27.462700 | C  | 29.040645 | 4.813561 | 25.176468 |
| C  | 24.947287 | 3.324923 | 26.452596 | C  | 13.900000 | 3.935000 | 24.313000 |
| C  | 24.450820 | 4.078573 | 25.371759 | C  | 28.700444 | 2.942076 | 23.666522 |
| C  | 23.065282 | 4.386096 | 25.320432 | C  | 27.335352 | 3.171900 | 23.642315 |
| C  | 22.561126 | 5.072111 | 24.194370 | C  | 26.784181 | 4.248743 | 24.372557 |
| C  | 23.416660 | 5.486600 | 23.178580 | O  | 26.561727 | 2.289287 | 22.891301 |
| C  | 24.782788 | 5.228716 | 23.249869 | O  | 16.595455 | 6.406056 | 25.845327 |
| C  | 25.310480 | 4.512757 | 24.332735 | O  | 16.057567 | 4.267436 | 26.321349 |
| O  | 25.626266 | 5.647616 | 22.226780 | C  | 15.736458 | 5.463953 | 25.983378 |
| O  | 20.434553 | 5.530163 | 26.187604 | C  | 17.933618 | 5.830233 | 30.229767 |
| O  | 19.916035 | 3.383070 | 26.648152 | C  | 18.923642 | 6.606097 | 30.860016 |
| C  | 20.770230 | 4.313213 | 26.415855 | C  | 16.799739 | 5.403449 | 30.976211 |
| C  | 18.226927 | 4.022014 | 22.293999 | C  | 15.725387 | 4.718735 | 30.368962 |
| C  | 18.992915 | 2.941012 | 21.873981 | C  | 14.638704 | 4.295982 | 31.128136 |
| C  | 19.081890 | 2.638017 | 20.519979 | O  | 18.432169 | 6.414392 | 27.971616 |
| C  | 18.404876 | 3.417024 | 19.587993 | O  | 17.905898 | 4.268786 | 28.429988 |
| C  | 17.639888 | 4.497025 | 20.008011 | C  | 18.105355 | 5.483602 | 28.792741 |
| C  | 17.550913 | 4.800019 | 21.362013 | Cu | 34.145176 | 6.011033 | 26.078243 |
| C  | 16.783924 | 5.881020 | 21.784030 | Cu | 33.593259 | 3.605834 | 26.546907 |
|    |           |          |           | C  | 37.849423 | 3.892611 | 26.365643 |
|    |           |          |           | C  | 38.381046 | 3.139465 | 27.428549 |

|   |           |          |           |    |           |          |           |
|---|-----------|----------|-----------|----|-----------|----------|-----------|
| C | 39.729094 | 2.808008 | 27.465671 | C  | 44.365912 | 2.805733 | 23.685244 |
| C | 40.571416 | 3.215080 | 26.437447 | C  | 42.997960 | 3.021134 | 23.632377 |
| C | 40.079504 | 3.947474 | 25.340284 | C  | 42.419789 | 4.093582 | 24.348414 |
| C | 38.698057 | 4.277478 | 25.290252 | O  | 42.248681 | 2.126565 | 22.871233 |
| C | 38.198116 | 4.948781 | 24.154887 | O  | 32.177835 | 6.313205 | 25.995852 |
| C | 39.053380 | 5.316583 | 23.120153 | O  | 31.691185 | 4.149377 | 26.405499 |
| C | 40.416029 | 5.034296 | 23.187383 | C  | 31.337853 | 5.351748 | 26.130378 |
| C | 40.941434 | 4.342366 | 24.287273 | C  | 33.683540 | 5.628848 | 30.310309 |
| O | 41.258901 | 5.412353 | 22.148070 | C  | 34.751015 | 6.289392 | 30.944574 |
| O | 36.052811 | 5.454780 | 26.177733 | C  | 32.522694 | 5.296104 | 31.063204 |
| O | 35.556749 | 3.299586 | 26.624439 | C  | 31.388706 | 4.718145 | 30.456295 |
| C | 36.401216 | 4.237830 | 26.394099 | C  | 30.259379 | 4.421698 | 31.214636 |
| C | 33.846855 | 4.021974 | 22.293721 | O  | 34.099452 | 6.272005 | 28.052393 |
| C | 34.612832 | 2.940971 | 21.873686 | O  | 33.575186 | 4.116995 | 28.468704 |
| C | 34.701783 | 2.637980 | 20.519681 | C  | 33.797721 | 5.319739 | 28.858361 |
| C | 34.024755 | 3.416991 | 19.587710 | Cu | 49.701315 | 6.215321 | 25.976291 |
| C | 33.259777 | 4.496993 | 20.007743 | Cu | 49.342276 | 3.800180 | 26.563630 |
| C | 33.170827 | 4.799985 | 21.361749 | C  | 53.571004 | 4.464799 | 26.367945 |
| C | 32.403849 | 5.880988 | 21.783783 | C  | 54.157059 | 3.947781 | 27.515908 |
| C | 31.727822 | 6.658998 | 20.849812 | C  | 55.530060 | 3.732767 | 27.559832 |
| C | 31.817772 | 6.355006 | 19.496807 | C  | 56.316003 | 4.036770 | 26.454793 |
| C | 32.583750 | 5.274004 | 19.075773 | C  | 55.729947 | 4.554788 | 25.305829 |
| O | 31.143744 | 7.185017 | 18.538837 | C  | 54.356948 | 4.768802 | 25.262905 |
| O | 34.123561 | 5.508281 | 24.153018 | C  | 53.770890 | 5.287820 | 24.113942 |
| O | 33.636385 | 3.347410 | 24.573771 | C  | 54.557834 | 5.591822 | 23.007903 |
| C | 33.858009 | 4.315191 | 23.759450 | C  | 55.929834 | 5.377808 | 23.052827 |
| C | 29.887812 | 5.640793 | 25.964623 | C  | 56.515890 | 4.858790 | 24.200790 |
| C | 29.344510 | 6.756253 | 26.626854 | O  | 56.643771 | 5.617813 | 21.841791 |
| C | 43.546957 | 6.899689 | 26.544514 | O  | 51.641367 | 5.841671 | 26.119366 |
| C | 42.729835 | 6.050217 | 25.809165 | O  | 51.332404 | 3.667823 | 26.640391 |
| C | 43.260923 | 4.943988 | 25.113776 | C  | 52.093436 | 4.670497 | 26.381397 |
| C | 44.659454 | 4.695587 | 25.179898 | C  | 49.466780 | 4.021882 | 22.293161 |
| C | 29.553407 | 3.746512 | 24.411157 | C  | 50.232747 | 2.940878 | 21.873109 |

|   |           |          |           |    |           |          |           |
|---|-----------|----------|-----------|----|-----------|----------|-----------|
| C | 50.321671 | 2.637891 | 20.519101 | O  | 9.453203  | 2.792985 | 38.218146 |
| C | 49.644629 | 3.416907 | 19.587145 | Cu | 17.236383 | 6.164325 | 41.540080 |
| C | 48.879663 | 4.496911 | 20.007197 | Cu | 16.685151 | 3.764315 | 42.033483 |
| C | 48.790739 | 4.799899 | 21.361205 | C  | 20.945700 | 4.111331 | 42.114353 |
| C | 48.023773 | 5.880903 | 21.783256 | C  | 21.401305 | 3.467251 | 43.279310 |
| C | 47.347732 | 6.658919 | 20.849300 | C  | 22.742618 | 3.147162 | 43.442224 |
| C | 47.437657 | 6.354932 | 19.496292 | C  | 23.652951 | 3.442647 | 42.434404 |
| C | 48.203622 | 5.273928 | 19.075240 | C  | 23.238464 | 4.052816 | 41.236209 |
| O | 46.763615 | 7.184949 | 18.538336 | C  | 21.869413 | 4.400381 | 41.071198 |
| O | 49.737015 | 5.594784 | 24.085076 | C  | 21.456377 | 4.985929 | 39.856776 |
| O | 49.387139 | 3.431294 | 24.609552 | C  | 22.378063 | 5.212521 | 38.836685 |
| C | 49.528398 | 4.371751 | 23.748555 | C  | 23.717945 | 4.865534 | 38.994369 |
| C | 45.485225 | 5.554259 | 25.955938 | C  | 24.159153 | 4.294881 | 40.192179 |
| C | 44.911105 | 6.657659 | 26.613358 | O  | 24.615000 | 5.040820 | 37.949706 |
| C | 45.197577 | 3.625566 | 24.438726 | O  | 19.147047 | 5.635818 | 41.730566 |
| O | 47.722727 | 6.353597 | 25.875074 | O  | 18.649340 | 3.486166 | 42.203195 |
| O | 47.393862 | 4.186978 | 26.409946 | C  | 19.495254 | 4.431640 | 42.007849 |
| C | 46.953378 | 5.348792 | 26.083771 | C  | 16.988307 | 4.147540 | 37.791020 |
| C | 49.207329 | 6.016898 | 30.210659 | C  | 17.727414 | 3.062956 | 37.286928 |
| C | 50.160915 | 6.852612 | 30.819646 | C  | 17.758811 | 2.795223 | 35.925019 |
| C | 48.093705 | 5.558782 | 30.968440 | C  | 17.047708 | 3.601852 | 35.043105 |
| C | 47.055960 | 4.805291 | 30.379871 | C  | 16.269691 | 4.683615 | 35.505818 |
| C | 45.982808 | 4.363056 | 31.147332 | C  | 16.223322 | 4.949356 | 36.900265 |
| O | 49.612324 | 6.581786 | 27.929675 | C  | 15.389825 | 5.984414 | 37.370036 |
| O | 49.291355 | 4.410382 | 28.453162 | C  | 14.662170 | 6.760489 | 36.477332 |
| C | 49.388099 | 5.647743 | 28.780685 | C  | 14.729217 | 6.538470 | 35.112221 |
| C | 11.158284 | 7.260965 | 41.959133 | C  | 15.537476 | 5.497543 | 34.601290 |
| C | 10.287267 | 6.502972 | 41.186144 | O  | 13.993255 | 7.397624 | 34.298763 |
| C | 10.757252 | 5.394972 | 40.491132 | O  | 17.288019 | 5.625053 | 39.632133 |
| C | 12.099252 | 5.042967 | 40.571107 | O  | 16.807237 | 3.464465 | 40.068793 |
| C | 11.698220 | 3.178974 | 39.103108 | C  | 17.034173 | 4.426683 | 39.250186 |
| C | 10.356220 | 3.528979 | 39.024133 | C  | 12.972269 | 5.800962 | 41.346096 |
| C | 9.886236  | 4.637978 | 39.718145 | C  | 12.500284 | 6.908961 | 42.040108 |

|    |           |          |           |   |           |          |           |
|----|-----------|----------|-----------|---|-----------|----------|-----------|
| C  | 27.058169 | 7.191325 | 41.624130 | C | 37.531399 | 4.335149 | 40.691336 |
| C  | 26.142013 | 6.255249 | 41.188721 | C | 36.975155 | 5.189595 | 39.696108 |
| C  | 26.530840 | 4.925742 | 40.820488 | C | 37.760338 | 5.735016 | 38.708976 |
| C  | 27.926588 | 4.579843 | 40.954036 | C | 39.158902 | 5.495391 | 38.670611 |
| C  | 12.571236 | 3.934968 | 39.877095 | C | 39.751896 | 4.661332 | 39.615615 |
| C  | 27.422263 | 2.356096 | 40.095901 | O | 39.919827 | 6.084108 | 37.705513 |
| C  | 26.045975 | 2.683287 | 39.974627 | O | 34.965674 | 5.292176 | 41.810621 |
| C  | 25.592980 | 3.950505 | 40.328817 | O | 34.474793 | 3.113961 | 42.077605 |
| O  | 25.285788 | 1.655692 | 39.497443 | C | 35.282227 | 4.070191 | 41.878394 |
| O  | 15.271573 | 6.441413 | 41.374936 | C | 32.659223 | 3.945620 | 37.868339 |
| O  | 14.775763 | 4.286093 | 41.811339 | C | 33.233037 | 2.781742 | 37.386808 |
| C  | 14.425757 | 5.484258 | 41.509458 | C | 33.227051 | 2.514685 | 36.001691 |
| C  | 16.604046 | 5.868709 | 45.755255 | C | 32.623978 | 3.389484 | 35.122637 |
| C  | 17.582589 | 6.664746 | 46.379281 | C | 31.972279 | 4.585187 | 35.569676 |
| C  | 18.835508 | 6.915387 | 32.211008 | C | 32.000330 | 4.862976 | 36.983065 |
| C  | 17.754240 | 6.459937 | 32.956976 | C | 31.317314 | 6.019902 | 37.459263 |
| C  | 16.725883 | 5.703543 | 32.362317 | C | 30.632856 | 6.841406 | 36.599513 |
| C  | 15.478894 | 5.428903 | 46.508535 | C | 30.606355 | 6.579867 | 35.203430 |
| C  | 14.415406 | 4.719840 | 45.911061 | C | 31.287408 | 5.487236 | 34.676721 |
| C  | 13.334229 | 4.292541 | 46.676459 | O | 29.878499 | 7.499973 | 34.499040 |
| C  | 14.588909 | 4.542081 | 32.497693 | O | 33.130508 | 5.366035 | 39.704075 |
| C  | 15.618570 | 5.256601 | 33.124788 | O | 32.482863 | 3.253803 | 40.123438 |
| O  | 13.496665 | 4.113950 | 33.244068 | C | 32.758339 | 4.211924 | 39.341226 |
| O  | 17.106214 | 6.466756 | 43.502317 | C | 28.853990 | 5.571525 | 41.429063 |
| O  | 16.590376 | 4.315199 | 43.941031 | C | 28.422371 | 6.854188 | 41.732375 |
| C  | 16.778289 | 5.528921 | 44.314959 | C | 42.239986 | 7.068769 | 42.135942 |
| Cu | 33.122129 | 6.003598 | 41.601940 | C | 41.454414 | 6.288851 | 41.294802 |
| Cu | 32.550826 | 3.544424 | 42.085540 | C | 42.025645 | 5.292609 | 40.477287 |
| C  | 36.733972 | 3.728481 | 41.720815 | C | 43.429378 | 5.082320 | 40.527771 |
| C  | 37.290884 | 2.822780 | 42.605567 | C | 28.331394 | 3.268282 | 40.565817 |
| C  | 38.670947 | 2.529389 | 42.543443 | C | 43.208583 | 3.391465 | 38.800707 |
| C  | 39.472256 | 3.126867 | 41.594534 | C | 41.833553 | 3.558767 | 38.771225 |
| C  | 38.940679 | 4.042337 | 40.628261 | C | 41.223063 | 4.509772 | 39.612632 |



|    |           |          |           |   |           |          |           |
|----|-----------|----------|-----------|---|-----------|----------|-----------|
| O  | 41.113288 | 2.738048 | 37.907657 | C | 50.777191 | 4.733705 | 41.957643 |
| O  | 31.124778 | 6.236787 | 41.406765 | C | 48.279254 | 4.410604 | 37.807594 |
| O  | 30.655169 | 4.129726 | 42.018779 | C | 49.061149 | 3.349520 | 37.317162 |
| C  | 30.316181 | 5.286893 | 41.626218 | C | 49.117400 | 3.074432 | 35.958097 |
| C  | 32.398314 | 5.570948 | 45.795390 | C | 48.389685 | 3.850538 | 35.063443 |
| C  | 33.245667 | 6.481210 | 46.402904 | C | 47.572003 | 4.909569 | 35.509973 |
| C  | 34.705707 | 6.579246 | 32.302288 | C | 47.502416 | 5.184694 | 36.902430 |
| C  | 33.588423 | 6.225216 | 33.050690 | C | 46.633835 | 6.198088 | 37.354429 |
| C  | 32.484250 | 5.588121 | 32.453847 | C | 45.893362 | 6.944720 | 36.446805 |
| C  | 31.319887 | 4.971235 | 46.531873 | C | 45.977855 | 6.710283 | 35.084304 |
| C  | 30.378206 | 4.089356 | 45.928076 | C | 46.821723 | 5.689665 | 34.590655 |
| C  | 29.340558 | 3.554251 | 46.652902 | O | 45.223656 | 7.538134 | 34.255377 |
| C  | 30.231536 | 4.677833 | 32.583197 | O | 48.486077 | 5.890459 | 39.665596 |
| C  | 31.337136 | 5.258787 | 33.213236 | O | 48.116270 | 3.703703 | 40.077059 |
| O  | 29.088972 | 4.397099 | 33.321560 | C | 48.294343 | 4.684674 | 39.269294 |
| O  | 32.913174 | 6.220046 | 43.582443 | C | 44.219346 | 5.851549 | 41.424072 |
| O  | 32.577739 | 4.035355 | 43.994640 | C | 43.610083 | 6.854203 | 42.199019 |
| C  | 32.644613 | 5.249836 | 44.348998 | C | 44.008697 | 4.133498 | 39.662568 |
| Cu | 48.449495 | 6.399691 | 41.586506 | O | 46.475268 | 6.614085 | 41.469670 |
| Cu | 48.004626 | 3.969152 | 42.045194 | O | 46.078694 | 4.424844 | 41.846568 |
| C  | 52.242277 | 4.464616 | 41.931345 | C | 45.677349 | 5.616556 | 41.588027 |
| C  | 52.828352 | 3.947593 | 43.079296 | C | 47.885455 | 6.019492 | 45.794714 |
| C  | 54.201352 | 3.732573 | 43.123194 | C | 48.858017 | 6.806892 | 46.438286 |
| C  | 54.987277 | 4.036578 | 42.018142 | C | 50.057105 | 7.193377 | 32.162305 |
| C  | 54.401202 | 4.554601 | 40.869191 | C | 48.995224 | 6.711499 | 32.920030 |
| C  | 53.028202 | 4.768621 | 40.826292 | C | 48.001777 | 5.895749 | 32.345201 |
| C  | 52.442128 | 5.287645 | 39.677341 | C | 46.749607 | 5.575094 | 46.526656 |
| C  | 53.229054 | 5.591649 | 38.571289 | C | 45.697352 | 4.867965 | 45.907301 |
| C  | 54.601054 | 5.377629 | 38.616189 | C | 44.604342 | 4.435378 | 46.651727 |
| C  | 55.187129 | 4.858606 | 39.764139 | C | 45.914356 | 4.651241 | 32.508115 |
| O  | 55.314970 | 5.617636 | 37.405141 | C | 46.911760 | 5.424380 | 33.117951 |
| O  | 50.374040 | 5.931730 | 41.730612 | O | 44.837975 | 4.200156 | 33.263661 |
| O  | 49.977678 | 3.754902 | 42.177661 | O | 48.350090 | 6.666279 | 43.552070 |

|    |           |          |           |   |           |          |           |
|----|-----------|----------|-----------|---|-----------|----------|-----------|
| O  | 47.914414 | 4.490511 | 43.962044 | C | 13.364593 | 6.819756 | 52.010680 |
| C  | 48.065837 | 5.704713 | 44.351920 | C | 13.428905 | 6.592726 | 50.645649 |
| C  | 9.830844  | 7.260885 | 57.522289 | C | 14.222733 | 5.539486 | 50.137766 |
| C  | 8.959813  | 6.502896 | 56.749314 | O | 12.704136 | 7.458140 | 49.828971 |
| C  | 9.429780  | 5.394897 | 56.054290 | O | 15.941377 | 5.607395 | 55.207673 |
| C  | 10.771780 | 5.042887 | 56.134240 | O | 15.413251 | 3.448341 | 55.594679 |
| C  | 10.370715 | 3.178901 | 54.666241 | C | 15.665976 | 4.422137 | 54.798338 |
| C  | 9.028715  | 3.528910 | 54.587291 | C | 11.644813 | 5.800876 | 56.909215 |
| C  | 8.558747  | 4.637908 | 55.281315 | C | 11.172845 | 6.908875 | 57.603239 |
| O  | 8.125681  | 2.792922 | 53.781316 | C | 25.341063 | 6.889531 | 57.577069 |
| Cu | 15.900951 | 6.101713 | 57.132348 | C | 24.499982 | 6.050995 | 56.855962 |
| Cu | 15.322583 | 3.696804 | 57.565883 | C | 25.001438 | 4.925815 | 56.169130 |
| C  | 19.579207 | 3.957753 | 57.474855 | C | 26.394374 | 4.648043 | 56.227014 |
| C  | 20.106138 | 3.205451 | 58.540245 | C | 11.243748 | 3.934890 | 55.440215 |
| C  | 21.451207 | 2.860445 | 58.573543 | C | 26.048810 | 2.752099 | 54.750433 |
| C  | 22.293253 | 3.251843 | 57.538446 | C | 24.684737 | 2.991026 | 54.713484 |
| C  | 21.803884 | 3.982285 | 56.438559 | C | 24.135927 | 4.082551 | 55.423632 |
| C  | 20.426782 | 4.328281 | 56.394213 | O | 23.908919 | 2.099072 | 53.976121 |
| C  | 19.928178 | 5.000072 | 55.258161 | O | 13.946394 | 6.415818 | 56.973624 |
| C  | 20.780658 | 5.349870 | 54.215369 | O | 13.422444 | 4.261404 | 57.382519 |
| C  | 22.139300 | 5.048911 | 54.274872 | C | 13.089942 | 5.467304 | 57.090650 |
| C  | 22.662744 | 4.357773 | 55.376144 | C | 15.283042 | 5.695809 | 61.352094 |
| O  | 22.980073 | 5.407905 | 53.227336 | C | 16.314083 | 6.385792 | 61.978046 |
| O  | 17.799386 | 5.535454 | 57.297850 | C | 17.492051 | 6.984026 | 47.727519 |
| O  | 17.280474 | 3.374030 | 57.687722 | C | 16.419406 | 6.518890 | 48.478992 |
| C  | 18.134597 | 4.311920 | 57.496119 | C | 15.401667 | 5.742724 | 47.892423 |
| C  | 15.636847 | 4.165055 | 53.334253 | C | 14.198077 | 5.242813 | 62.095147 |
| C  | 16.365464 | 3.072939 | 52.830404 | C | 13.166036 | 4.552830 | 61.469195 |
| C  | 16.404581 | 2.810242 | 51.468092 | C | 12.083071 | 4.099834 | 62.213248 |
| C  | 15.710004 | 3.628355 | 50.584358 | C | 13.280289 | 4.556343 | 48.042990 |
| C  | 14.942735 | 4.718352 | 51.045332 | C | 14.300941 | 5.290758 | 48.661369 |
| C  | 14.893565 | 4.983551 | 52.440491 | O | 12.194769 | 4.121625 | 48.795395 |
| C  | 14.077167 | 6.033024 | 52.906997 | O | 15.773891 | 6.358124 | 59.104661 |

|    |           |          |           |    |           |          |           |
|----|-----------|----------|-----------|----|-----------|----------|-----------|
| O  | 15.269457 | 4.194018 | 59.487514 | C  | 26.698978 | 6.613787 | 57.645413 |
| C  | 15.449566 | 5.398662 | 59.894452 | C  | 40.894786 | 6.908896 | 57.568619 |
| Cu | 31.485227 | 5.958919 | 57.118175 | C  | 40.079287 | 6.059871 | 56.832006 |
| Cu | 31.001366 | 3.551734 | 57.647896 | C  | 40.611702 | 4.955567 | 56.134557 |
| C  | 35.242417 | 3.951651 | 57.500954 | C  | 42.012501 | 4.716019 | 56.189628 |
| C  | 35.803212 | 3.262778 | 58.591923 | C  | 26.904030 | 3.563661 | 55.485690 |
| C  | 37.155674 | 2.948042 | 58.618703 | C  | 41.719502 | 2.833731 | 54.684943 |
| C  | 37.972148 | 3.307302 | 57.552244 | C  | 40.348613 | 3.030889 | 54.655289 |
| C  | 37.450659 | 3.978445 | 56.429434 | C  | 39.768620 | 4.096785 | 55.380132 |
| C  | 36.065208 | 4.291252 | 56.391353 | O  | 39.598576 | 2.121092 | 53.913069 |
| C  | 35.534433 | 4.898789 | 55.234187 | O  | 29.516016 | 6.201422 | 56.995271 |
| C  | 36.363621 | 5.223402 | 54.165062 | O  | 29.082025 | 4.036048 | 57.452987 |
| C  | 37.730421 | 4.960399 | 54.218335 | C  | 28.699250 | 5.224490 | 57.153792 |
| C  | 38.286489 | 4.329072 | 55.339805 | C  | 30.903116 | 5.695628 | 61.351271 |
| O  | 38.547229 | 5.295513 | 53.144421 | C  | 31.934171 | 6.385605 | 61.977208 |
| O  | 33.407000 | 5.461607 | 57.269829 | C  | 33.089184 | 6.796181 | 47.770123 |
| O  | 32.968601 | 3.306087 | 57.773861 | C  | 32.076398 | 6.223805 | 48.508813 |
| C  | 33.787221 | 4.261315 | 57.524345 | C  | 31.147518 | 5.301621 | 47.925544 |
| C  | 31.329576 | 3.848234 | 53.400410 | C  | 29.818163 | 5.242633 | 62.094342 |
| C  | 32.173398 | 2.813888 | 52.958048 | C  | 28.786109 | 4.552656 | 61.468406 |
| C  | 32.279717 | 2.508964 | 51.607669 | C  | 27.703155 | 4.099663 | 62.212477 |
| C  | 31.541395 | 3.227831 | 50.674106 | C  | 29.181377 | 3.848802 | 48.032528 |
| C  | 30.660283 | 4.252629 | 51.072878 | C  | 30.067546 | 4.714379 | 48.670986 |
| C  | 30.540037 | 4.558033 | 52.455733 | O  | 28.154136 | 3.287323 | 48.728763 |
| C  | 29.613837 | 5.538911 | 52.859787 | O  | 31.383875 | 6.288691 | 59.081288 |
| C  | 28.858712 | 6.220758 | 51.912278 | O  | 30.933864 | 4.128213 | 59.546668 |
| C  | 28.994121 | 5.958897 | 50.558518 | C  | 31.084796 | 5.351969 | 59.906782 |
| C  | 29.898586 | 4.971144 | 50.119413 | Cu | 47.047349 | 6.241270 | 57.149678 |
| O  | 28.225163 | 6.724242 | 49.686075 | Cu | 46.691691 | 3.784740 | 57.538648 |
| O  | 31.511972 | 5.390817 | 55.209586 | C  | 50.914826 | 4.464382 | 57.493755 |
| O  | 31.102267 | 3.224318 | 55.688271 | C  | 51.500920 | 3.947352 | 58.641694 |
| C  | 31.309679 | 4.174265 | 54.851477 | C  | 52.873920 | 3.732327 | 58.685568 |
| C  | 27.242996 | 5.489451 | 56.998164 | C  | 53.659827 | 4.036331 | 57.580503 |

|   |           |          |           |   |           |          |           |
|---|-----------|----------|-----------|---|-----------|----------|-----------|
| C | 53.073733 | 4.554362 | 56.431564 | C | 47.658643 | 6.654915 | 48.516840 |
| C | 51.700733 | 4.768387 | 56.388690 | C | 46.650151 | 5.881243 | 47.910021 |
| C | 51.114640 | 5.287417 | 55.239751 | C | 45.438249 | 5.242399 | 62.093255 |
| C | 51.901547 | 5.591423 | 54.133687 | C | 44.406182 | 4.552428 | 61.467335 |
| C | 53.273547 | 5.377397 | 54.178561 | C | 43.323240 | 4.099435 | 62.211424 |
| C | 53.859639 | 4.858367 | 55.326499 | C | 44.528784 | 4.689611 | 48.018801 |
| O | 53.987443 | 5.617405 | 52.967501 | C | 45.538732 | 5.421284 | 48.658596 |
| O | 48.989074 | 5.855871 | 57.301892 | O | 43.432268 | 4.248544 | 48.750814 |
| O | 48.676371 | 3.650928 | 57.671063 | O | 46.915585 | 6.439591 | 59.122019 |
| C | 49.438397 | 4.669976 | 57.498478 | O | 46.579901 | 4.234267 | 59.466117 |
| C | 46.953678 | 4.349666 | 53.319724 | C | 46.675902 | 5.440683 | 59.891814 |
| C | 47.755888 | 3.315315 | 52.805306 | C | 16.262158 | 6.620778 | 63.347051 |
| C | 47.803437 | 3.060944 | 51.442262 | C | 15.179191 | 6.168782 | 64.090104 |
| C | 47.048003 | 3.832529 | 50.567379 | C | 14.147152 | 5.478800 | 63.465152 |
| C | 46.214436 | 4.869069 | 51.037637 | C | 12.031146 | 4.336820 | 63.582253 |
| C | 46.151604 | 5.120652 | 52.434560 | C | 13.063187 | 5.025805 | 64.207205 |
| C | 45.263999 | 6.106249 | 52.910475 | O | 10.943183 | 3.908824 | 64.361306 |
| C | 44.502178 | 6.853476 | 52.021291 | C | 31.882271 | 6.620587 | 63.346214 |
| C | 44.583153 | 6.646306 | 50.654333 | C | 30.799317 | 6.168593 | 64.089284 |
| C | 45.442804 | 5.650490 | 50.137065 | C | 29.767262 | 5.478616 | 63.464348 |
| O | 43.813295 | 7.479799 | 49.845683 | C | 27.651255 | 4.336645 | 63.581483 |
| O | 47.121639 | 5.788141 | 55.215793 | C | 28.683309 | 5.025622 | 64.206418 |
| O | 46.813704 | 3.580998 | 55.566849 | O | 26.563304 | 3.908650 | 64.360554 |
| C | 46.963373 | 4.588288 | 54.786919 | C | 47.502385 | 6.620342 | 63.345096 |
| C | 42.836840 | 5.569474 | 56.974482 | C | 46.419443 | 6.168348 | 64.088184 |
| C | 42.258577 | 6.667487 | 57.638587 | C | 45.387375 | 5.478376 | 63.463264 |
| C | 42.552253 | 3.660090 | 55.429390 | C | 43.271365 | 4.336411 | 63.580432 |
| O | 45.072158 | 6.382269 | 57.017748 | C | 44.303433 | 5.025383 | 64.205353 |
| O | 44.746723 | 4.176780 | 57.357581 | O | 42.183428 | 3.908416 | 64.359522 |
| C | 44.304715 | 5.359323 | 57.118936 | H | 12.119271 | 8.127086 | 26.935748 |
| C | 46.523192 | 5.695393 | 61.350166 | H | 10.573023 | 6.786801 | 25.566437 |
| C | 47.554258 | 6.385364 | 61.976087 | H | 13.383797 | 2.323292 | 22.982513 |
| C | 48.746504 | 7.118851 | 47.786628 | H | 9.847411  | 3.169589 | 22.677263 |

|   |           |          |           |   |           |          |           |
|---|-----------|----------|-----------|---|-----------|----------|-----------|
| H | 22.108023 | 2.837584 | 28.226303 | H | 41.673812 | 6.276923 | 25.774626 |
| H | 24.503207 | 2.283315 | 28.280859 | H | 30.613075 | 3.524069 | 24.361593 |
| H | 25.995892 | 3.066660 | 26.514416 | H | 44.786123 | 1.982880 | 23.122571 |
| H | 21.504868 | 5.286000 | 24.072575 | H | 35.630045 | 6.570579 | 30.375583 |
| H | 23.006703 | 6.015538 | 22.328841 | H | 31.351612 | 4.504570 | 29.392320 |
| H | 19.532377 | 2.329869 | 22.589986 | H | 29.397909 | 3.987729 | 30.724555 |
| H | 19.679457 | 1.794168 | 20.190523 | H | 31.291615 | 6.860768 | 17.596367 |
| H | 18.480537 | 3.170850 | 18.536729 | H | 40.774894 | 5.933550 | 21.432424 |
| H | 16.650776 | 6.145064 | 22.827097 | H | 41.267097 | 2.345887 | 22.860246 |
| H | 15.506767 | 7.500870 | 21.165269 | H | 53.552061 | 3.700686 | 28.381470 |
| H | 14.495601 | 7.508397 | 27.087364 | H | 55.987732 | 3.326253 | 28.455790 |
| H | 27.579194 | 7.890348 | 27.086511 | H | 57.384077 | 3.866366 | 26.497863 |
| H | 26.091113 | 6.442795 | 25.809769 | H | 52.703451 | 5.451151 | 24.013623 |
| H | 14.941524 | 3.633907 | 24.312316 | H | 54.081074 | 5.975726 | 22.116704 |
| H | 29.101364 | 2.119898 | 23.088936 | H | 50.777952 | 2.335447 | 22.589451 |
| H | 19.778615 | 6.959042 | 30.294498 | H | 50.920975 | 1.795332 | 20.189754 |
| H | 15.699533 | 4.512867 | 29.304313 | H | 49.720357 | 3.170966 | 18.535925 |
| H | 13.830195 | 3.768289 | 30.640623 | H | 47.862837 | 6.134526 | 22.823839 |
| H | 15.672056 | 6.861191 | 17.596385 | H | 46.741007 | 7.496651 | 21.164975 |
| H | 25.138528 | 6.178141 | 21.520607 | H | 45.534890 | 7.332860 | 27.188073 |
| H | 25.581561 | 2.514707 | 22.904042 | H | 46.260420 | 3.412157 | 24.418542 |
| H | 37.738105 | 2.816943 | 28.239685 | H | 50.997973 | 7.230099 | 30.243480 |
| H | 40.124820 | 2.233505 | 28.297484 | H | 47.049821 | 4.558606 | 29.323467 |
| H | 41.615729 | 2.939923 | 26.498758 | H | 45.200450 | 3.785319 | 30.673994 |
| H | 37.145636 | 5.188159 | 24.044012 | H | 46.912434 | 6.861363 | 17.595838 |
| H | 38.647047 | 5.833220 | 22.261149 | H | 56.056133 | 5.977171 | 21.104189 |
| H | 35.147926 | 2.326545 | 22.590078 | H | 10.790960 | 8.128089 | 42.498400 |
| H | 35.298127 | 1.793240 | 20.190382 | H | 9.244455  | 6.787086 | 41.129938 |
| H | 34.099828 | 3.170507 | 18.536511 | H | 12.055643 | 2.325213 | 38.543938 |
| H | 32.267382 | 6.144104 | 22.826357 | H | 8.519716  | 3.172080 | 38.238549 |
| H | 31.125163 | 7.499748 | 21.165184 | H | 20.703056 | 3.221888 | 44.071730 |
| H | 29.985627 | 7.407708 | 27.209675 | H | 23.078744 | 2.661557 | 44.353274 |
| H | 43.119513 | 7.753191 | 27.061389 | H | 24.690005 | 3.175406 | 42.593831 |

|   |           |          |           |   |           |          |           |
|---|-----------|----------|-----------|---|-----------|----------|-----------|
| H | 20.421465 | 5.258848 | 39.672833 | H | 40.390539 | 6.485116 | 41.275215 |
| H | 22.039199 | 5.654623 | 37.908595 | H | 29.380329 | 2.988998 | 40.640488 |
| H | 18.292893 | 2.430429 | 37.961432 | H | 43.660450 | 2.665102 | 38.137785 |
| H | 18.341110 | 1.960033 | 35.548724 | H | 34.045379 | 6.941046 | 45.816910 |
| H | 17.097300 | 3.361705 | 33.990526 | H | 35.541782 | 7.081835 | 32.778864 |
| H | 15.276256 | 6.203924 | 38.425432 | H | 33.587015 | 6.470132 | 34.105228 |
| H | 14.029740 | 7.556948 | 36.846096 | H | 30.474801 | 3.836957 | 44.872573 |
| H | 13.168971 | 7.511761 | 42.645525 | H | 28.624211 | 2.883849 | 46.162621 |
| H | 26.724347 | 8.199518 | 41.889045 | H | 28.379984 | 3.931843 | 32.772910 |
| H | 25.090504 | 6.553800 | 41.126051 | H | 29.788201 | 7.270780 | 33.560890 |
| H | 13.612344 | 3.634839 | 39.868392 | H | 39.359037 | 6.646926 | 37.147343 |
| H | 27.734264 | 1.352955 | 39.793291 | H | 40.120065 | 2.912484 | 37.929410 |
| H | 18.429845 | 7.029357 | 45.809482 | H | 52.223905 | 3.709803 | 43.947705 |
| H | 19.613227 | 7.505985 | 32.685529 | H | 54.659337 | 3.328053 | 44.019861 |
| H | 17.720521 | 6.715412 | 34.007497 | H | 56.055400 | 3.866563 | 42.061192 |
| H | 14.393728 | 4.498027 | 44.849546 | H | 51.374687 | 5.453015 | 39.579267 |
| H | 12.533290 | 3.746897 | 46.196236 | H | 52.752248 | 5.975782 | 37.680102 |
| H | 12.837771 | 3.585964 | 32.691708 | H | 49.639296 | 2.738889 | 38.001412 |
| H | 14.075086 | 7.180417 | 33.320281 | H | 49.730042 | 2.255473 | 35.594479 |
| H | 24.201493 | 5.529718 | 37.165892 | H | 48.457761 | 3.603395 | 34.013598 |
| H | 24.356167 | 1.901655 | 39.367855 | H | 46.501711 | 6.422325 | 38.406687 |
| H | 36.657231 | 2.352506 | 43.361888 | H | 45.232371 | 7.724006 | 36.802006 |
| H | 39.107404 | 1.824189 | 43.257924 | H | 44.207481 | 7.461844 | 42.869148 |
| H | 40.538085 | 2.878425 | 41.577689 | H | 45.079393 | 3.959889 | 39.629330 |
| H | 35.908748 | 5.413350 | 39.706276 | H | 49.713195 | 7.174357 | 45.882490 |
| H | 37.305325 | 6.377572 | 37.945348 | H | 50.805949 | 7.831826 | 32.620571 |
| H | 33.701460 | 2.083918 | 38.085519 | H | 48.946488 | 6.994221 | 33.963026 |
| H | 33.701873 | 1.604061 | 35.622725 | H | 45.694923 | 4.649786 | 44.844822 |
| H | 32.636092 | 3.138397 | 34.057185 | H | 43.811960 | 3.891685 | 46.155307 |
| H | 31.328738 | 6.250661 | 38.524613 | H | 44.202042 | 3.630437 | 32.725916 |
| H | 30.089055 | 7.717167 | 36.965516 | H | 45.311271 | 7.304823 | 33.281059 |
| H | 29.150067 | 7.593271 | 42.073918 | H | 54.726403 | 5.972290 | 36.665856 |
| H | 41.781468 | 7.840055 | 42.746973 | H | 9.463316  | 8.126902 | 58.063108 |

|                                |                                |
|--------------------------------|--------------------------------|
| H 7.916929 6.786669 56.693543  | H 32.941758 1.713139 51.280574 |
| H 10.728289 2.325618 54.106425 | H 31.651819 2.961260 49.631226 |
| H 7.191911 3.171197 53.802696  | H 29.450888 5.784045 53.904454 |
| H 19.461853 2.892976 59.354123 | H 28.149043 6.973503 52.230040 |
| H 21.844547 2.285885 59.406332 | H 27.340082 7.274086 58.218369 |
| H 23.334833 2.965569 57.595843 | H 40.465842 7.759537 58.088856 |
| H 18.878632 5.253916 55.152825 | H 39.023165 6.285489 56.798357 |
| H 20.375366 5.865808 53.355463 | H 27.962499 3.332605 55.449016 |
| H 16.915005 2.427897 53.506439 | H 42.141675 2.020484 54.109880 |
| H 16.977675 1.967988 51.093328 | H 32.791907 6.730940 61.410258 |
| H 15.763480 3.390168 49.531539 | H 33.777658 7.501506 48.246305 |
| H 13.966043 6.255331 53.962324 | H 31.982384 6.494390 49.565148 |
| H 12.744116 7.626833 52.376675 | H 28.748633 4.377444 60.399244 |
| H 11.840691 7.508244 58.213054 | H 26.897520 3.574952 61.718282 |
| H 24.936344 7.757276 58.088349 | H 27.645975 2.701300 48.144454 |
| H 23.448938 6.300355 56.825782 | H 28.365454 6.484813 48.716464 |
| H 12.285188 3.636522 55.426518 | H 38.043299 5.772125 52.411533 |
| H 26.447416 1.917640 54.189023 | H 38.613891 2.324818 53.919378 |
| H 17.169052 6.737739 61.410793 | H 50.894973 3.699707 59.506285 |
| H 18.260020 7.592670 48.194832 | H 53.331554 3.325433 59.581273 |
| H 16.382637 6.783954 49.527070 | H 54.727842 3.865695 57.623128 |
| H 13.125526 4.379120 60.400360 | H 50.047582 5.459431 55.145591 |
| H 11.277366 3.575255 61.719136 | H 51.424889 5.977037 53.243044 |
| H 11.544894 3.575145 48.250381 | H 48.352523 2.706065 53.474722 |
| H 12.777031 7.230678 48.851931 | H 48.429056 2.260367 51.060330 |
| H 22.498436 5.926515 52.508182 | H 47.107904 3.599271 49.513998 |
| H 22.931347 2.335542 53.975055 | H 45.133336 6.308158 53.967457 |
| H 35.178624 2.973071 59.429262 | H 43.828332 7.612981 52.394735 |
| H 37.574519 2.420959 59.470232 | H 42.879172 7.338619 58.221485 |
| H 39.019862 3.043714 57.604641 | H 43.617030 3.463512 55.382921 |
| H 34.477663 5.121964 55.133067 | H 48.405836 6.744138 61.407891 |
| H 35.933748 5.690763 53.289456 | H 49.507842 7.723168 48.269939 |
| H 32.763688 2.250950 53.672224 | H 47.602976 6.917924 49.564509 |

|   |           |           |           |                     |           |           |           |
|---|-----------|-----------|-----------|---------------------|-----------|-----------|-----------|
| H | 44.381954 | 4.363875  | 60.399399 | C                   | 26.001931 | 7.823443  | 37.115996 |
| H | 42.519440 | 3.571466  | 61.717720 | C                   | 24.805232 | 8.201977  | 37.767163 |
| H | 42.788440 | 3.708635  | 48.191946 | C                   | 23.675605 | 8.567642  | 37.032132 |
| H | 43.901116 | 7.269212  | 48.866397 | C                   | 23.701328 | 8.575264  | 35.631777 |
| H | 53.398563 | 5.970354  | 52.227586 | C                   | 24.888456 | 8.214812  | 34.980005 |
| H | 17.068447 | 7.157633  | 63.836089 | C                   | 26.023526 | 7.844242  | 35.702801 |
| H | 15.148130 | 6.357150  | 65.155578 | N                   | 27.127348 | 7.471113  | 37.840648 |
| H | 10.263275 | 3.421594  | 63.797066 | H                   | 35.143518 | 9.689683  | 43.053239 |
| H | 32.689291 | 7.156046  | 63.835509 | H                   | 32.726295 | 8.824671  | 42.944828 |
| H | 30.768274 | 6.356660  | 65.154793 | H                   | 31.678994 | 8.649626  | 40.668458 |
| H | 25.882139 | 3.423693  | 63.795753 | H                   | 35.740713 | 9.800789  | 40.663598 |
| H | 48.307585 | 7.158982  | 63.833791 | H                   | 35.811975 | 11.449067 | 41.315231 |
| H | 46.387786 | 6.357243  | 65.153506 | H                   | 33.500322 | 11.906613 | 40.446555 |
| H | 41.501456 | 3.424779  | 63.794480 | H                   | 34.613862 | 11.491077 | 39.133903 |
| H | 54.922548 | 4.682749  | 55.325787 | H                   | 33.651525 | 9.282932  | 38.847659 |
| H | 56.250089 | 4.683135  | 39.763699 | H                   | 32.267784 | 10.360035 | 39.074930 |
| H | 57.578892 | 4.683427  | 24.200640 | H                   | 33.972536 | 11.012640 | 42.883026 |
| H | 32.654258 | 5.043328  | 18.026531 | H                   | 24.767038 | 8.190428  | 38.861241 |
| H | 17.034854 | 5.043595  | 18.026691 | H                   | 22.760405 | 8.847381  | 37.565922 |
| H | 10.176556 | 4.915317  | 24.089703 | H                   | 22.814850 | 8.864411  | 35.059202 |
| H | 8.848020  | 4.915634  | 39.653268 | H                   | 24.933537 | 8.221997  | 33.885163 |
| H | 7.520574  | 4.915579  | 55.216386 | H                   | 26.949949 | 7.576903  | 35.182531 |
| H | 12.998943 | 5.198973  | 65.269024 | H                   | 27.815679 | 6.900926  | 37.355961 |
| H | 28.618798 | 5.198884  | 65.268171 | H                   | 26.971690 | 7.172807  | 38.801462 |
| H | 44.238651 | 5.198804  | 65.267041 |                     |           |           |           |
| H | 48.273944 | 5.043150  | 18.026068 | RC <sub>BINOL</sub> |           |           |           |
| C | 32.691186 | 9.067722  | 40.736169 | C                   | 12.487000 | 7.261000  | 26.395000 |
| C | 33.308765 | 9.160509  | 42.076609 | C                   | 11.616000 | 6.503000  | 25.622000 |
| C | 34.419998 | 10.148295 | 42.353744 | C                   | 12.086000 | 5.395000  | 24.927000 |
| C | 35.122229 | 10.621885 | 41.070806 | C                   | 13.428000 | 5.043000  | 25.007000 |
| C | 34.099794 | 11.077854 | 40.020038 | C                   | 13.027000 | 3.179000  | 23.539000 |
| C | 33.154464 | 9.942197  | 39.584007 | C                   | 11.685000 | 3.529000  | 23.460000 |
| O | 33.653721 | 8.083461  | 41.184950 | C                   | 11.215000 | 4.638000  | 24.154000 |



|    |           |          |           |    |           |          |           |
|----|-----------|----------|-----------|----|-----------|----------|-----------|
| O  | 10.782000 | 2.793000 | 22.654000 | C  | 27.969479 | 7.049243 | 26.491558 |
| Cu | 18.545906 | 6.084099 | 26.020446 | C  | 27.133618 | 6.197970 | 25.777632 |
| Cu | 17.951514 | 3.696709 | 26.531490 | C  | 27.642875 | 5.069792 | 25.102962 |
| C  | 22.219271 | 3.946278 | 26.387989 | C  | 29.037186 | 4.800937 | 25.167876 |
| C  | 22.757463 | 3.180395 | 27.438179 | C  | 13.900000 | 3.935000 | 24.313000 |
| C  | 24.110667 | 2.866431 | 27.471319 | C  | 28.708248 | 2.895716 | 23.697362 |
| C  | 24.950644 | 3.304103 | 26.452862 | C  | 27.342852 | 3.122615 | 23.659586 |
| C  | 24.451104 | 4.046488 | 25.366289 | C  | 26.784565 | 4.213352 | 24.363301 |
| C  | 23.065336 | 4.356141 | 25.318242 | O  | 26.575904 | 2.222332 | 22.923103 |
| C  | 22.557877 | 5.033251 | 24.188691 | O  | 16.597624 | 6.402718 | 25.855008 |
| C  | 23.408887 | 5.429902 | 23.161888 | O  | 16.055854 | 4.262897 | 26.320011 |
| C  | 24.774863 | 5.168009 | 23.228089 | C  | 15.736546 | 5.461392 | 25.986609 |
| C  | 25.307909 | 4.467740 | 24.318937 | C  | 17.908936 | 5.817224 | 30.237208 |
| O  | 25.612724 | 5.570354 | 22.193765 | C  | 18.899174 | 6.579454 | 30.883831 |
| O  | 20.437973 | 5.516343 | 26.193908 | C  | 16.755276 | 5.409415 | 30.965104 |
| O  | 19.915064 | 3.370858 | 26.655501 | C  | 15.683137 | 4.736289 | 30.341448 |
| C  | 20.772081 | 4.298820 | 26.423085 | C  | 14.573180 | 4.339124 | 31.081089 |
| C  | 18.226925 | 4.022012 | 22.293999 | O  | 18.433546 | 6.400415 | 27.983058 |
| C  | 18.992913 | 2.941010 | 21.873981 | O  | 17.896808 | 4.256248 | 28.435081 |
| C  | 19.081888 | 2.638015 | 20.519979 | C  | 18.097141 | 5.470046 | 28.801222 |
| C  | 18.404874 | 3.417021 | 19.587993 | Cu | 34.141585 | 6.026349 | 26.068786 |
| C  | 17.639885 | 4.497022 | 20.008011 | Cu | 33.591043 | 3.625552 | 26.555653 |
| C  | 17.550911 | 4.800017 | 21.362013 | C  | 37.844803 | 3.906020 | 26.392333 |
| C  | 16.783920 | 5.881019 | 21.784030 | C  | 38.371643 | 3.177982 | 27.475248 |
| C  | 16.107906 | 6.659024 | 20.850045 | C  | 39.717371 | 2.837687 | 27.519849 |
| C  | 16.197881 | 6.355028 | 19.497042 | C  | 40.561086 | 3.208795 | 26.479326 |
| C  | 16.963871 | 5.274029 | 19.076025 | C  | 40.073399 | 3.916020 | 25.363976 |
| O  | 15.523868 | 7.185034 | 18.539057 | C  | 38.695295 | 4.257714 | 25.307928 |
| O  | 18.566108 | 5.529220 | 24.114386 | C  | 38.199450 | 4.908130 | 24.158964 |
| O  | 18.024828 | 3.387795 | 24.575376 | C  | 39.054993 | 5.238303 | 23.112094 |
| C  | 18.266193 | 4.336246 | 23.746807 | C  | 40.414668 | 4.942639 | 23.182560 |
| C  | 14.301000 | 5.801000 | 25.782000 | C  | 40.936641 | 4.275816 | 24.299802 |
| C  | 13.829000 | 6.909000 | 26.476000 | O  | 41.258152 | 5.286236 | 22.131851 |

|   |           |          |           |    |           |          |           |
|---|-----------|----------|-----------|----|-----------|----------|-----------|
| O | 36.050503 | 5.468902 | 26.176817 | C  | 32.684068 | 5.260855 | 31.146323 |
| O | 35.552041 | 3.316196 | 26.633577 | C  | 31.572049 | 4.564362 | 30.629134 |
| C | 36.397486 | 4.253415 | 26.405924 | C  | 30.529175 | 4.179758 | 31.466780 |
| C | 33.846852 | 4.021974 | 22.293716 | O  | 34.100189 | 6.302754 | 28.038808 |
| C | 34.612829 | 2.940971 | 21.873681 | O  | 33.590003 | 4.149893 | 28.476485 |
| C | 34.701778 | 2.637980 | 20.519676 | C  | 33.818511 | 5.355030 | 28.857420 |
| C | 34.024750 | 3.416990 | 19.587706 | Cu | 49.689249 | 6.197404 | 25.991917 |
| C | 33.259772 | 4.496992 | 20.007739 | Cu | 49.344897 | 3.777506 | 26.565472 |
| C | 33.170822 | 4.799984 | 21.361745 | C  | 53.571003 | 4.464803 | 26.367930 |
| C | 32.403844 | 5.880987 | 21.783779 | C  | 54.157056 | 3.947784 | 27.515893 |
| C | 31.727817 | 6.658997 | 20.849809 | C  | 55.530058 | 3.732771 | 27.559816 |
| C | 31.817767 | 6.355005 | 19.496804 | C  | 56.316001 | 4.036773 | 26.454777 |
| C | 32.583744 | 5.274001 | 19.075769 | C  | 55.729944 | 4.554792 | 25.305813 |
| O | 31.143737 | 7.185017 | 18.538834 | C  | 54.356945 | 4.768807 | 25.262890 |
| O | 34.123767 | 5.512282 | 24.147793 | C  | 53.770888 | 5.287824 | 24.113928 |
| O | 33.630373 | 3.355196 | 24.579943 | C  | 54.557831 | 5.591827 | 23.007888 |
| C | 33.856685 | 4.318081 | 23.759985 | C  | 55.929832 | 5.377811 | 23.052810 |
| C | 29.879513 | 5.647968 | 25.942660 | C  | 56.515887 | 4.858794 | 24.200774 |
| C | 29.329164 | 6.779252 | 26.572177 | O  | 56.643767 | 5.617817 | 21.841773 |
| C | 43.532858 | 6.867824 | 26.523596 | O  | 51.633364 | 5.833992 | 26.126742 |
| C | 42.719536 | 6.007654 | 25.797249 | O  | 51.336379 | 3.655742 | 26.636091 |
| C | 43.252909 | 4.888279 | 25.125511 | C  | 52.092137 | 4.663711 | 26.381685 |
| C | 44.650766 | 4.638635 | 25.204738 | C  | 49.466776 | 4.021885 | 22.293147 |
| C | 29.555562 | 3.716828 | 24.430850 | C  | 50.232742 | 2.940881 | 21.873096 |
| C | 44.359836 | 2.717268 | 23.749139 | C  | 50.321665 | 2.637894 | 20.519088 |
| C | 42.993043 | 2.935292 | 23.683693 | C  | 49.644622 | 3.416909 | 19.587132 |
| C | 42.414125 | 4.025191 | 24.371742 | C  | 48.879655 | 4.496913 | 20.007183 |
| O | 42.245189 | 2.024050 | 22.941427 | C  | 48.790732 | 4.799902 | 21.361191 |
| O | 32.171593 | 6.326919 | 25.980605 | C  | 48.023768 | 5.880906 | 21.783244 |
| O | 31.687547 | 4.167705 | 26.414697 | C  | 47.347725 | 6.658920 | 20.849287 |
| C | 31.331639 | 5.365830 | 26.124127 | C  | 47.437649 | 6.354933 | 19.496280 |
| C | 33.762224 | 5.674541 | 30.313559 | C  | 48.203614 | 5.273930 | 19.075227 |
| C | 34.807930 | 6.435738 | 30.869811 | O  | 46.763606 | 7.184950 | 18.538323 |

|    |           |          |           |   |           |          |           |
|----|-----------|----------|-----------|---|-----------|----------|-----------|
| O  | 49.724745 | 5.588884 | 24.095162 | C | 21.378138 | 5.268694 | 39.813793 |
| O  | 49.387106 | 3.420933 | 24.608010 | C | 22.287545 | 5.779235 | 38.892800 |
| C  | 49.523312 | 4.366409 | 23.751371 | C | 23.643945 | 5.484993 | 38.994302 |
| C  | 45.474481 | 5.512254 | 25.967896 | C | 24.107194 | 4.640707 | 40.011469 |
| C  | 44.896555 | 6.626748 | 26.603971 | O | 24.541432 | 5.999265 | 38.065221 |
| C  | 45.189761 | 3.551514 | 24.488983 | O | 19.130387 | 5.515372 | 41.658902 |
| O  | 47.708915 | 6.325073 | 25.895442 | O | 18.609581 | 3.364579 | 42.089024 |
| O  | 47.393301 | 4.154675 | 26.420690 | C | 19.466782 | 4.294834 | 41.870002 |
| C  | 46.944888 | 5.314896 | 26.099208 | C | 16.866401 | 4.092348 | 37.746780 |
| C  | 49.195253 | 5.968233 | 30.229377 | C | 17.553465 | 2.978408 | 37.231763 |
| C  | 50.135742 | 6.814828 | 30.844367 | C | 17.559446 | 2.713627 | 35.868860 |
| C  | 48.087392 | 5.489844 | 30.984621 | C | 16.876174 | 3.552937 | 34.996096 |
| C  | 47.062420 | 4.721892 | 30.392228 | C | 16.148246 | 4.664186 | 35.469280 |
| C  | 45.992154 | 4.265098 | 31.155291 | C | 16.124964 | 4.926682 | 36.865244 |
| O  | 49.600959 | 6.550621 | 27.950066 | C | 15.338058 | 5.992845 | 37.345285 |
| O  | 49.295082 | 4.374193 | 28.459712 | C | 14.631892 | 6.798578 | 36.460778 |
| C  | 49.382027 | 5.609977 | 28.795860 | C | 14.678756 | 6.578505 | 35.094113 |
| C  | 11.158285 | 7.260976 | 41.959131 | C | 15.445023 | 5.511647 | 34.572779 |
| C  | 10.287267 | 6.502982 | 41.186143 | O | 13.968209 | 7.466360 | 34.289504 |
| C  | 10.757252 | 5.394981 | 40.491131 | O | 17.237603 | 5.554737 | 39.591451 |
| C  | 12.099252 | 5.042976 | 40.571107 | O | 16.703318 | 3.406473 | 40.025556 |
| C  | 11.698220 | 3.178982 | 39.103109 | C | 16.943239 | 4.365663 | 39.207208 |
| C  | 10.356220 | 3.528988 | 39.024134 | C | 12.972269 | 5.800972 | 41.346094 |
| C  | 9.886236  | 4.637987 | 39.718144 | C | 12.500285 | 6.908972 | 42.040106 |
| O  | 9.453202  | 2.792994 | 38.218147 | C | 26.809485 | 7.013123 | 42.354287 |
| Cu | 17.235428 | 6.086650 | 41.504888 | C | 25.956515 | 6.223368 | 41.592182 |
| Cu | 16.648785 | 3.694490 | 41.994475 | C | 26.440867 | 5.113578 | 40.868869 |
| C  | 20.915643 | 3.939037 | 41.856356 | C | 27.823391 | 4.793861 | 40.939365 |
| C  | 21.397381 | 3.047401 | 42.834272 | C | 12.571236 | 3.934978 | 39.877095 |
| C  | 22.742717 | 2.708606 | 42.893887 | C | 27.449755 | 2.955732 | 39.396345 |
| C  | 23.635065 | 3.251782 | 41.978329 | C | 26.096579 | 3.240989 | 39.339542 |
| C  | 23.196152 | 4.121689 | 40.962611 | C | 25.568357 | 4.324678 | 40.076148 |
| C  | 21.818069 | 4.458845 | 40.883772 | O | 25.308873 | 2.406012 | 38.549923 |

|    |           |          |           |   |           |          |           |
|----|-----------|----------|-----------|---|-----------|----------|-----------|
| O  | 15.278008 | 6.409680 | 41.375446 | C | 32.711153 | 4.034463 | 38.108672 |
| O  | 14.748902 | 4.265591 | 41.830081 | C | 33.286741 | 2.837892 | 37.638854 |
| C  | 14.418404 | 5.467549 | 41.520425 | C | 33.331458 | 2.546890 | 36.282703 |
| C  | 16.719745 | 5.778873 | 45.727997 | C | 32.795410 | 3.439509 | 35.363763 |
| C  | 17.762403 | 6.492517 | 46.347879 | C | 32.183268 | 4.637952 | 35.781111 |
| C  | 18.790781 | 6.893326 | 32.232558 | C | 32.132373 | 4.940629 | 37.171576 |
| C  | 17.689197 | 6.457237 | 32.960051 | C | 31.469191 | 6.114411 | 37.583884 |
| C  | 16.660085 | 5.715803 | 32.348830 | C | 30.933755 | 6.987856 | 36.644716 |
| C  | 15.565740 | 5.430537 | 46.483188 | C | 31.001016 | 6.716058 | 35.289035 |
| C  | 14.457303 | 4.790442 | 45.890037 | C | 31.616497 | 5.529863 | 34.832304 |
| C  | 13.341636 | 4.461242 | 46.653816 | O | 30.448778 | 7.662898 | 34.428639 |
| C  | 14.500610 | 4.593393 | 32.448360 | O | 32.984452 | 5.469640 | 40.010576 |
| C  | 15.532359 | 5.288919 | 33.093142 | O | 32.482720 | 3.303122 | 40.371495 |
| O  | 13.387299 | 4.186636 | 33.175353 | C | 32.721612 | 4.287891 | 39.582575 |
| O  | 17.158247 | 6.382814 | 43.468055 | C | 28.681995 | 5.585699 | 41.750326 |
| O  | 16.627987 | 4.234490 | 43.909590 | C | 28.157213 | 6.696622 | 42.433010 |
| C  | 16.847599 | 5.443127 | 44.284002 | C | 42.234028 | 7.026049 | 42.099691 |
| Cu | 32.933802 | 5.941571 | 41.945906 | C | 41.416844 | 6.144852 | 41.402658 |
| Cu | 32.376298 | 3.528870 | 42.348758 | C | 41.954247 | 5.040545 | 40.709450 |
| C  | 36.632186 | 3.826600 | 42.175842 | C | 43.359011 | 4.826330 | 40.739277 |
| C  | 37.210926 | 3.038599 | 43.187398 | C | 28.314361 | 3.717734 | 40.172278 |
| C  | 38.561288 | 2.711774 | 43.152191 | C | 43.068095 | 2.911328 | 39.274025 |
| C  | 39.357723 | 3.160009 | 42.103541 | C | 41.694422 | 3.090961 | 39.262513 |
| C  | 38.815104 | 3.925077 | 41.053862 | C | 41.112382 | 4.156208 | 39.985102 |
| C  | 37.431540 | 4.245818 | 41.074407 | O | 40.944457 | 2.170319 | 38.534263 |
| C  | 36.878712 | 4.945200 | 39.980206 | O | 30.972433 | 6.240429 | 41.801802 |
| C  | 37.683883 | 5.346200 | 38.918607 | O | 30.474897 | 4.068669 | 42.158718 |
| C  | 39.049437 | 5.074880 | 38.919172 | C | 30.128568 | 5.279451 | 41.911254 |
| C  | 39.627761 | 4.362200 | 39.978319 | C | 32.149874 | 5.517347 | 46.107478 |
| O  | 39.843819 | 5.491300 | 37.856404 | C | 33.089552 | 6.238186 | 46.819060 |
| O  | 34.837756 | 5.393455 | 42.093865 | C | 34.823330 | 6.751865 | 32.221946 |
| O  | 34.342296 | 3.224187 | 42.471142 | C | 33.786156 | 6.329294 | 33.044610 |
| C  | 35.185745 | 4.170029 | 42.266751 | C | 32.704124 | 5.591886 | 32.529549 |

|    |           |          |           |   |           |          |           |
|----|-----------|----------|-----------|---|-----------|----------|-----------|
| C  | 30.899443 | 5.117288 | 46.692164 | C | 45.974752 | 6.635783 | 35.091904 |
| C  | 29.820274 | 4.516593 | 45.969229 | C | 46.801555 | 5.599136 | 34.603421 |
| C  | 28.623079 | 4.230618 | 46.576811 | O | 45.234155 | 7.471308 | 34.258708 |
| C  | 30.556787 | 4.483668 | 32.826234 | O | 48.443934 | 5.799425 | 39.673155 |
| C  | 31.631670 | 5.201631 | 33.368189 | O | 48.100091 | 3.614323 | 40.112553 |
| O  | 29.502272 | 4.101154 | 33.647807 | C | 48.256699 | 4.588431 | 39.290961 |
| O  | 32.805718 | 6.179302 | 43.914622 | C | 44.184947 | 5.708590 | 41.490501 |
| O  | 32.277989 | 4.006274 | 44.272477 | C | 43.604430 | 6.812876 | 42.141331 |
| C  | 32.442100 | 5.214367 | 44.684682 | C | 43.901080 | 3.762132 | 39.991002 |
| Cu | 48.412849 | 6.330930 | 41.587233 | O | 46.433242 | 6.505900 | 41.482889 |
| Cu | 48.014325 | 3.900514 | 42.082112 | O | 46.079622 | 4.320862 | 41.914542 |
| C  | 52.242277 | 4.464613 | 41.931331 | C | 45.652233 | 5.497960 | 41.632337 |
| C  | 52.828351 | 3.947590 | 43.079282 | C | 47.873583 | 5.997903 | 45.803535 |
| C  | 54.201352 | 3.732569 | 43.123180 | C | 48.835342 | 6.801241 | 46.443644 |
| C  | 54.987276 | 4.036572 | 42.018127 | C | 50.024908 | 7.146714 | 32.188985 |
| C  | 54.401202 | 4.554594 | 40.869175 | C | 48.968593 | 6.646907 | 32.942812 |
| C  | 53.028202 | 4.768616 | 40.826278 | C | 47.987115 | 5.821210 | 32.362549 |
| C  | 52.442127 | 5.287638 | 39.677327 | C | 46.734396 | 5.556363 | 46.532495 |
| C  | 53.229054 | 5.591642 | 38.571275 | C | 45.693040 | 4.832149 | 45.914485 |
| C  | 54.601053 | 5.377620 | 38.616175 | C | 44.593757 | 4.407560 | 46.654520 |
| C  | 55.187127 | 4.858598 | 39.764122 | C | 45.913795 | 4.552060 | 32.515791 |
| O  | 55.314970 | 5.617627 | 37.405127 | C | 46.899954 | 5.335590 | 33.130704 |
| O  | 50.348357 | 5.900640 | 41.721040 | O | 44.838782 | 4.088409 | 33.265713 |
| O  | 49.991741 | 3.721108 | 42.188028 | O | 48.322778 | 6.622205 | 43.550749 |
| C  | 50.773227 | 4.711397 | 41.955105 | O | 47.940841 | 4.442820 | 43.994245 |
| C  | 48.227042 | 4.301306 | 37.829679 | C | 48.063753 | 5.666050 | 44.365672 |
| C  | 48.988240 | 3.223049 | 37.342603 | C | 9.830843  | 7.260911 | 57.522287 |
| C  | 49.042473 | 2.944756 | 35.983700 | C | 8.959811  | 6.502921 | 56.749313 |
| C  | 48.333656 | 3.733606 | 35.085162 | C | 9.429778  | 5.394922 | 56.054289 |
| C  | 47.534050 | 4.807496 | 35.527287 | C | 10.771778 | 5.042912 | 56.134240 |
| C  | 47.465992 | 5.087105 | 36.919345 | C | 10.370714 | 3.178925 | 54.666242 |
| C  | 46.614870 | 6.118080 | 37.365482 | C | 9.028713  | 3.528933 | 54.587292 |
| C  | 45.892026 | 6.876849 | 36.453141 | C | 8.558746  | 4.637932 | 55.281315 |

|    |           |          |           |    |           |          |           |
|----|-----------|----------|-----------|----|-----------|----------|-----------|
| O  | 8.125680  | 2.792944 | 53.781318 | C  | 25.301497 | 7.066998 | 57.646035 |
| Cu | 15.893588 | 6.159078 | 57.134550 | C  | 24.471235 | 6.291802 | 56.845325 |
| Cu | 15.356041 | 3.740708 | 57.539211 | C  | 24.983407 | 5.227232 | 56.075373 |
| C  | 19.613432 | 4.082793 | 57.379115 | C  | 26.376116 | 4.948619 | 56.126877 |
| C  | 20.179428 | 3.275323 | 58.382334 | C  | 11.243746 | 3.934914 | 55.440217 |
| C  | 21.531905 | 2.958054 | 58.364378 | C  | 26.059684 | 3.203235 | 54.470071 |
| C  | 22.343471 | 3.432618 | 57.339674 | C  | 24.693584 | 3.432585 | 54.445690 |
| C  | 21.817274 | 4.223288 | 56.300548 | C  | 24.128544 | 4.445136 | 55.254410 |
| C  | 20.431882 | 4.540064 | 56.306208 | O  | 23.931662 | 2.608018 | 53.620800 |
| C  | 19.897310 | 5.271813 | 55.224400 | O  | 13.936629 | 6.441162 | 56.974441 |
| C  | 20.721727 | 5.713146 | 54.194007 | O  | 13.444350 | 4.275608 | 57.362743 |
| C  | 22.087834 | 5.442765 | 54.208798 | C  | 13.093963 | 5.479669 | 57.082478 |
| C  | 22.647950 | 4.689157 | 55.249657 | C  | 15.283038 | 5.695841 | 61.352095 |
| O  | 22.898794 | 5.896454 | 53.174004 | C  | 16.314079 | 6.385825 | 61.978046 |
| O  | 17.800469 | 5.629791 | 57.292746 | C  | 17.696157 | 6.827372 | 47.694015 |
| O  | 17.325530 | 3.452978 | 57.646375 | C  | 16.584020 | 6.463999 | 48.444813 |
| C  | 18.161252 | 4.408704 | 57.454073 | C  | 15.508299 | 5.766567 | 47.862309 |
| C  | 15.662652 | 4.257703 | 53.310595 | C  | 14.198074 | 5.242844 | 62.095148 |
| C  | 16.350166 | 3.137532 | 52.808411 | C  | 13.166033 | 4.552860 | 61.469196 |
| C  | 16.377749 | 2.868496 | 51.447357 | C  | 12.083068 | 4.099863 | 62.213249 |
| C  | 15.714065 | 3.708344 | 50.561430 | C  | 13.299460 | 4.751984 | 48.015235 |
| C  | 14.994067 | 4.831798 | 51.017649 | C  | 14.371578 | 5.413101 | 48.630619 |
| C  | 14.954989 | 5.104394 | 52.412234 | O  | 12.178888 | 4.414052 | 48.765946 |
| C  | 14.180736 | 6.188434 | 52.872327 | O  | 15.756867 | 6.388355 | 59.110425 |
| C  | 13.508075 | 7.004160 | 51.970950 | O  | 15.289910 | 4.211809 | 59.470028 |
| C  | 13.565852 | 6.769788 | 50.607213 | C  | 15.448694 | 5.415025 | 59.890355 |
| C  | 14.310224 | 5.678437 | 50.105211 | Cu | 31.460001 | 6.112901 | 57.121269 |
| O  | 12.887510 | 7.667627 | 49.785932 | Cu | 30.942566 | 3.696984 | 57.562987 |
| O  | 15.949730 | 5.687121 | 55.202982 | C  | 35.191951 | 4.031802 | 57.416302 |
| O  | 15.448583 | 3.518190 | 55.565137 | C  | 35.731408 | 3.289540 | 58.483206 |
| C  | 15.688356 | 4.503471 | 54.778848 | C  | 37.079991 | 2.959481 | 58.514603 |
| C  | 11.644811 | 5.800902 | 56.909215 | C  | 37.914629 | 3.352482 | 57.474917 |
| C  | 11.172843 | 6.908901 | 57.603238 | C  | 37.415129 | 4.072587 | 56.373089 |

|   |           |          |           |    |           |          |           |
|---|-----------|----------|-----------|----|-----------|----------|-----------|
| C | 36.033891 | 4.406592 | 56.331735 | O  | 39.557391 | 2.247344 | 53.853417 |
| C | 35.526561 | 5.070437 | 55.195366 | O  | 29.492799 | 6.398666 | 57.033942 |
| C | 36.374967 | 5.427044 | 54.150739 | O  | 29.027282 | 4.219492 | 57.390627 |
| C | 37.736957 | 5.139409 | 54.208175 | C  | 28.663285 | 5.425958 | 57.142244 |
| C | 38.269710 | 4.452391 | 55.308065 | C  | 30.903113 | 5.695671 | 61.351281 |
| O | 38.572443 | 5.508581 | 53.159967 | C  | 31.934168 | 6.385649 | 61.977217 |
| O | 33.378123 | 5.578281 | 57.231381 | C  | 32.841939 | 6.556983 | 48.174867 |
| O | 32.907227 | 3.415988 | 57.675192 | C  | 31.684542 | 6.137567 | 48.792830 |
| C | 33.740073 | 4.364080 | 57.444929 | C  | 30.686747 | 5.402111 | 48.088725 |
| C | 31.189636 | 4.153306 | 53.346441 | C  | 29.818160 | 5.242675 | 62.094350 |
| C | 32.062896 | 3.202122 | 52.853867 | C  | 28.786107 | 4.552698 | 61.468415 |
| C | 32.040789 | 2.887260 | 51.476185 | C  | 27.703152 | 4.099704 | 62.212486 |
| C | 31.164696 | 3.531209 | 50.630420 | C  | 28.442367 | 4.468673 | 47.961581 |
| C | 30.242338 | 4.505796 | 51.109877 | C  | 29.467751 | 4.990998 | 48.741840 |
| C | 30.228120 | 4.812915 | 52.516145 | O  | 27.243420 | 4.207819 | 48.553269 |
| C | 29.210592 | 5.696607 | 52.997112 | O  | 31.384095 | 6.362297 | 59.100502 |
| C | 28.246397 | 6.191789 | 52.155261 | O  | 30.889254 | 4.196343 | 59.485292 |
| C | 28.282939 | 5.911578 | 50.767040 | C  | 31.067588 | 5.401066 | 59.891838 |
| C | 29.309592 | 5.146196 | 50.217427 | Cu | 47.047639 | 6.248626 | 57.148765 |
| O | 27.280509 | 6.434914 | 50.005099 | Cu | 46.684794 | 3.793008 | 57.533111 |
| O | 31.451286 | 5.627581 | 55.194165 | C  | 50.914822 | 4.464429 | 57.493771 |
| O | 31.033304 | 3.438043 | 55.601792 | C  | 51.500915 | 3.947400 | 58.641709 |
| C | 31.233283 | 4.421870 | 54.798332 | C  | 52.873915 | 3.732375 | 58.685585 |
| C | 27.211723 | 5.715240 | 56.984688 | C  | 53.659823 | 4.036378 | 57.580520 |
| C | 26.658436 | 6.783083 | 57.715052 | C  | 53.073729 | 4.554406 | 56.431580 |
| C | 40.902161 | 6.948861 | 57.599451 | C  | 51.700730 | 4.768431 | 56.388706 |
| C | 40.078425 | 6.121760 | 56.847670 | C  | 51.114638 | 5.287461 | 55.239765 |
| C | 40.599396 | 5.023974 | 56.132450 | C  | 51.901544 | 5.591465 | 54.133701 |
| C | 41.996855 | 4.762998 | 56.191490 | C  | 53.273543 | 5.377438 | 54.178575 |
| C | 26.900881 | 3.939118 | 55.296381 | C  | 53.859636 | 4.858411 | 55.326514 |
| C | 41.682646 | 2.903502 | 54.662923 | O  | 53.987441 | 5.617444 | 52.967515 |
| C | 40.316060 | 3.128526 | 54.620575 | O  | 48.989520 | 5.857957 | 57.299156 |
| C | 39.748091 | 4.193329 | 55.356264 | O  | 48.671769 | 3.653732 | 57.666720 |

|   |           |          |           |   |           |          |           |
|---|-----------|----------|-----------|---|-----------|----------|-----------|
| C | 49.436962 | 4.671381 | 57.496679 | O | 46.573925 | 4.238658 | 59.461971 |
| C | 46.940678 | 4.361777 | 53.313046 | C | 46.674600 | 5.443648 | 59.890664 |
| C | 47.734914 | 3.321908 | 52.796134 | C | 16.262151 | 6.620810 | 63.347051 |
| C | 47.770576 | 3.062174 | 51.433663 | C | 15.179185 | 6.168816 | 64.090104 |
| C | 47.010737 | 3.832216 | 50.561734 | C | 14.147147 | 5.478833 | 63.465153 |
| C | 46.185778 | 4.874554 | 51.033752 | C | 12.031142 | 4.336850 | 63.582254 |
| C | 46.136511 | 5.134013 | 52.429976 | C | 13.063181 | 5.025837 | 64.207206 |
| C | 45.260271 | 6.129112 | 52.907411 | O | 10.943178 | 3.908854 | 64.361306 |
| C | 44.493135 | 6.873891 | 52.020179 | C | 31.882266 | 6.620631 | 63.346223 |
| C | 44.557847 | 6.655145 | 50.654008 | C | 30.799313 | 6.168635 | 64.089293 |
| C | 45.410097 | 5.654052 | 50.135056 | C | 29.767259 | 5.478659 | 63.464356 |
| O | 43.780229 | 7.482995 | 49.847504 | C | 27.651253 | 4.336688 | 63.581492 |
| O | 47.117980 | 5.798383 | 55.212476 | C | 28.683306 | 5.025664 | 64.206427 |
| O | 46.806175 | 3.591646 | 55.560635 | O | 26.563301 | 3.908693 | 64.360564 |
| C | 46.955818 | 4.599510 | 54.781390 | C | 47.502381 | 6.620396 | 63.345107 |
| C | 42.831139 | 5.597925 | 56.986557 | C | 46.419438 | 6.168404 | 64.088195 |
| C | 42.263676 | 6.692855 | 57.665834 | C | 45.387370 | 5.478430 | 63.463277 |
| C | 42.523963 | 3.705465 | 55.424897 | C | 43.271360 | 4.336465 | 63.580445 |
| O | 45.072140 | 6.397120 | 57.020576 | C | 44.303429 | 5.025438 | 64.205366 |
| O | 44.738472 | 4.191967 | 57.352711 | O | 42.183423 | 3.908472 | 64.359536 |
| C | 44.299864 | 5.377643 | 57.121126 | H | 12.119211 | 8.126789 | 26.936182 |
| C | 46.523187 | 5.695444 | 61.350179 | H | 10.573025 | 6.786711 | 25.566689 |
| C | 47.554254 | 6.385417 | 61.976098 | H | 13.382421 | 2.322409 | 22.982934 |
| C | 48.710071 | 7.130484 | 47.786962 | H | 9.847352  | 3.169230 | 22.676979 |
| C | 47.619248 | 6.669377 | 48.514775 | H | 22.117847 | 2.839954 | 28.244926 |
| C | 46.620553 | 5.881630 | 47.910307 | H | 24.513696 | 2.284842 | 28.294267 |
| C | 45.438244 | 5.242452 | 62.093268 | H | 25.999369 | 3.045683 | 26.513407 |
| C | 44.406178 | 4.552479 | 61.467349 | H | 21.502138 | 5.253354 | 24.072736 |
| C | 43.323236 | 4.099487 | 62.211437 | H | 22.995734 | 5.949962 | 22.308371 |
| C | 44.503992 | 4.681326 | 48.017010 | H | 19.532791 | 2.330062 | 22.589870 |
| C | 45.506179 | 5.424290 | 48.656377 | H | 19.679967 | 1.794512 | 20.190528 |
| O | 43.403234 | 4.244368 | 48.745188 | H | 18.480950 | 3.171020 | 18.536757 |
| O | 46.918286 | 6.443255 | 59.122682 | H | 16.654533 | 6.146656 | 22.827199 |



|   |           |          |           |   |           |          |           |
|---|-----------|----------|-----------|---|-----------|----------|-----------|
| H | 15.507709 | 7.502061 | 21.163927 | H | 53.552114 | 3.699943 | 28.381309 |
| H | 14.495485 | 7.507741 | 27.088116 | H | 55.987707 | 3.326262 | 28.455800 |
| H | 27.557884 | 7.920138 | 26.991355 | H | 57.384038 | 3.866412 | 26.497977 |
| H | 26.080728 | 6.439350 | 25.742145 | H | 52.703570 | 5.454848 | 24.016528 |
| H | 14.941213 | 3.632956 | 24.313856 | H | 54.081383 | 5.977194 | 22.117115 |
| H | 29.113568 | 2.061131 | 23.140977 | H | 50.776921 | 2.334581 | 22.589459 |
| H | 19.769587 | 6.918380 | 30.332962 | H | 50.920600 | 1.795040 | 20.189833 |
| H | 15.677202 | 4.519734 | 29.278555 | H | 49.720208 | 3.170723 | 18.536000 |
| H | 13.765737 | 3.822247 | 30.580599 | H | 47.864186 | 6.135496 | 22.823710 |
| H | 15.673399 | 6.862582 | 17.596200 | H | 46.741322 | 7.497396 | 21.163719 |
| H | 25.122331 | 6.092830 | 21.483302 | H | 45.517168 | 7.312264 | 27.170394 |
| H | 25.595261 | 2.445469 | 22.926887 | H | 46.251624 | 3.333688 | 24.478926 |
| H | 37.726688 | 2.881335 | 28.295116 | H | 50.968376 | 7.207666 | 30.271560 |
| H | 40.110254 | 2.283280 | 28.366128 | H | 47.062824 | 4.475120 | 29.335914 |
| H | 41.603065 | 2.926366 | 26.546324 | H | 45.219347 | 3.677552 | 30.678541 |
| H | 37.149951 | 5.160754 | 24.047514 | H | 46.906369 | 6.857486 | 17.596322 |
| H | 38.651523 | 5.737873 | 22.241901 | H | 56.056711 | 5.973851 | 21.102086 |
| H | 35.147698 | 2.326957 | 22.590536 | H | 10.790862 | 8.127806 | 42.498795 |
| H | 35.298242 | 1.793310 | 20.190459 | H | 9.244502  | 6.787164 | 41.129938 |
| H | 34.099945 | 3.170486 | 18.536580 | H | 12.054340 | 2.324549 | 38.544025 |
| H | 32.267949 | 6.144829 | 22.826253 | H | 8.521031  | 3.175322 | 38.233337 |
| H | 31.125426 | 7.500419 | 21.164009 | H | 20.717948 | 2.624073 | 43.565863 |
| H | 29.964606 | 7.445743 | 27.144611 | H | 23.099301 | 2.027047 | 43.659784 |
| H | 43.102335 | 7.729477 | 27.023618 | H | 24.677011 | 2.971691 | 42.059212 |
| H | 41.664199 | 6.235536 | 25.752396 | H | 20.332668 | 5.506668 | 39.656471 |
| H | 30.615566 | 3.493630 | 24.394431 | H | 21.926860 | 6.406808 | 38.089217 |
| H | 44.779998 | 1.879801 | 23.208382 | H | 18.099852 | 2.320458 | 37.898242 |
| H | 35.624714 | 6.775819 | 30.242633 | H | 18.101360 | 1.855725 | 35.484044 |
| H | 31.483511 | 4.317632 | 29.576647 | H | 16.906198 | 3.314503 | 33.942384 |
| H | 29.689799 | 3.641790 | 31.047783 | H | 15.243825 | 6.213236 | 38.402565 |
| H | 31.288445 | 6.858872 | 17.596653 | H | 14.033594 | 7.617730 | 36.836807 |
| H | 40.777858 | 5.796099 | 21.405434 | H | 13.169061 | 7.509649 | 42.647390 |
| H | 41.262999 | 2.240446 | 22.928548 | H | 26.423895 | 7.873142 | 42.892128 |

|                                |                                |
|--------------------------------|--------------------------------|
| H 24.912311 6.498667 41.557620 | H 30.532379 7.410246 33.458634 |
| H 13.612117 3.634122 39.867835 | H 39.323738 6.021101 37.172926 |
| H 27.833302 2.127113 38.815939 | H 39.960086 2.377791 38.536123 |
| H 18.635741 6.784364 45.775020 | H 52.223744 3.706506 43.946731 |
| H 19.567831 7.473383 32.719994 | H 54.659174 3.327335 44.019597 |
| H 17.639686 6.716836 34.008949 | H 56.055309 3.866344 42.061207 |
| H 14.429793 4.544877 44.833498 | H 51.374671 5.455086 39.580815 |
| H 12.505135 3.968788 46.176899 | H 52.752474 5.976899 37.680412 |
| H 12.733192 3.661619 32.614209 | H 49.554731 2.603591 38.029025 |
| H 14.017992 7.236148 33.311799 | H 49.640495 2.114447 35.622514 |
| H 24.098486 6.617893 37.402588 | H 48.401144 3.484859 34.035663 |
| H 24.341351 2.679878 38.530358 | H 46.480542 6.345516 38.416881 |
| H 36.603478 2.685768 44.013379 | H 45.244261 7.669363 36.803690 |
| H 38.995054 2.108929 43.943415 | H 44.226214 7.504655 42.698600 |
| H 40.404753 2.888076 42.107627 | H 44.967948 3.579255 39.931812 |
| H 35.821984 5.181580 39.919992 | H 49.692068 7.167815 45.889205 |
| H 37.236147 5.883132 38.093485 | H 50.763401 7.793024 32.652196 |
| H 33.711220 2.127470 38.339544 | H 48.914096 6.923879 33.987141 |
| H 33.783379 1.621711 35.940025 | H 45.704049 4.594247 44.856060 |
| H 32.848727 3.176693 34.316737 | H 43.808712 3.853008 46.158497 |
| H 31.336483 6.373615 38.626899 | H 44.210132 3.514003 32.724223 |
| H 30.440482 7.893876 36.970569 | H 45.304318 7.220538 33.287386 |
| H 28.807301 7.312118 43.042997 | H 54.726213 5.965600 36.662773 |
| H 41.799921 7.877043 42.614470 | H 9.463448 8.127252 58.062701  |
| H 40.354899 6.345171 41.395106 | H 7.917015 6.786914 56.693495  |
| H 29.365732 3.455459 40.145440 | H 10.726816 2.324453 54.107251 |
| H 43.491687 2.094605 38.704819 | H 7.193291 3.174735 53.797293  |
| H 34.024691 6.568007 46.355054 | H 19.560547 2.898605 59.189118 |
| H 35.643780 7.329198 32.636072 | H 21.955941 2.341020 59.149929 |
| H 33.830055 6.593094 34.092895 | H 23.391437 3.164862 57.357557 |
| H 29.908503 4.293551 44.903436 | H 18.840639 5.504097 55.149613 |
| H 27.800752 3.796841 46.000145 | H 20.287517 6.276792 53.379467 |
| H 28.802340 3.568688 33.153423 | H 16.873487 2.471852 53.485836 |

|                                |                                |
|--------------------------------|--------------------------------|
| H 16.915665 2.002569 51.075028 | H 32.788689 6.737583 61.409298 |
| H 15.754782 3.460993 49.510282 | H 33.578292 7.141842 48.734604 |
| H 14.070906 6.417852 53.925934 | H 31.512494 6.394335 49.839018 |
| H 12.923743 7.840096 52.331736 | H 28.747123 4.376499 60.399801 |
| H 11.840420 7.509830 58.211866 | H 26.897762 3.574448 61.718432 |
| H 24.888071 7.889583 58.220590 | H 26.535072 3.977306 47.882594 |
| H 23.420815 6.543826 56.818746 | H 27.034917 5.745879 49.340421 |
| H 12.284730 3.635138 55.429515 | H 38.086408 6.030312 52.445895 |
| H 26.470760 2.430611 53.833757 | H 38.578701 2.478506 53.842676 |
| H 17.168404 6.739649 61.410939 | H 50.894795 3.699755 59.506114 |
| H 18.510371 7.373385 48.159313 | H 53.331488 3.325353 59.581256 |
| H 16.563971 6.744233 49.489300 | H 54.727771 3.865587 57.623202 |
| H 13.133563 4.371731 60.400919 | H 50.047739 5.460915 55.146159 |
| H 11.278544 3.572939 61.719668 | H 51.425155 5.978041 53.243257 |
| H 11.492374 3.909153 48.225372 | H 48.333585 2.711649 53.463222 |
| H 12.959588 7.439079 48.809224 | H 48.389273 2.257752 51.049382 |
| H 22.388918 6.452392 52.504089 | H 47.060016 3.592914 49.509171 |
| H 22.949585 2.821101 53.650224 | H 45.142673 6.340628 53.964076 |
| H 35.092289 2.971978 59.299525 | H 43.827091 7.640079 52.394188 |
| H 37.481875 2.394637 59.349308 | H 42.891045 7.350617 58.257140 |
| H 38.959118 3.077447 57.531531 | H 43.585311 3.488799 55.387757 |
| H 34.473171 5.312516 55.091641 | H 48.405513 6.744773 61.407834 |
| H 35.963238 5.938079 53.291012 | H 49.462391 7.746663 48.268517 |
| H 32.768505 2.680189 53.508952 | H 47.552518 6.946611 49.558113 |
| H 32.715449 2.119420 51.085316 | H 44.382342 4.363005 60.399589 |
| H 31.154043 3.270641 49.570937 | H 42.519526 3.571042 61.717949 |
| H 29.156047 5.961717 54.056898 | H 42.766753 3.693917 48.187853 |
| H 27.426469 6.808848 52.531783 | H 43.838187 7.247707 48.871588 |
| H 27.291063 7.390199 58.353029 | H 53.398351 5.963020 52.224203 |
| H 40.481120 7.795347 58.132137 | H 17.068386 7.157776 63.836094 |
| H 39.024815 6.359447 56.816285 | H 15.148295 6.357093 65.155573 |
| H 27.962082 3.714031 55.259380 | H 10.262041 3.422115 63.798141 |
| H 42.094464 2.089241 54.081778 | H 32.688604 7.157462 63.835082 |

|   |           |          |           |                     |           |           |           |
|---|-----------|----------|-----------|---------------------|-----------|-----------|-----------|
| H | 30.768275 | 6.357019 | 65.154663 | H                   | 26.143150 | 6.033523  | 46.482451 |
| H | 25.880724 | 3.425136 | 63.796284 | H                   | 22.597732 | 5.501253  | 44.020304 |
| H | 48.307438 | 7.159323 | 63.833709 | H                   | 22.679779 | 6.675632  | 45.345836 |
| H | 46.387753 | 6.357559 | 65.153431 | H                   | 21.344993 | 4.618917  | 45.984326 |
| H | 41.497209 | 3.430950 | 63.794299 | H                   | 22.803384 | 3.629864  | 45.756863 |
| H | 54.922468 | 4.682740 | 55.325478 | H                   | 22.612388 | 4.176009  | 48.164717 |
| H | 56.249997 | 4.683114 | 39.763384 | H                   | 22.422910 | 5.906380  | 47.799953 |
| H | 57.578847 | 4.683549 | 24.200360 | H                   | 24.891661 | 4.789993  | 44.344838 |
| H | 32.654139 | 5.043594 | 18.026555 | H                   | 25.540441 | 9.821324  | 45.956986 |
| H | 17.034773 | 5.043885 | 18.026683 | H                   | 27.139793 | 10.406343 | 44.153178 |
| H | 10.176561 | 4.915040 | 24.089519 | H                   | 29.492236 | 9.549267  | 44.211124 |
| H | 8.847984  | 4.915260 | 39.653157 | H                   | 30.198284 | 8.053524  | 46.099080 |
| H | 7.520505  | 4.915220 | 55.216468 | H                   | 28.608843 | 7.480878  | 47.906080 |
| H | 12.998722 | 5.198769 | 65.269007 | H                   | 25.258282 | 8.866310  | 48.181520 |
| H | 28.618680 | 5.198750 | 65.268091 | H                   | 26.476217 | 7.955951  | 48.957438 |
| H | 44.238260 | 5.198921 | 65.266950 |                     |           |           |           |
| H | 48.273808 | 5.043409 | 18.026056 | TS <sub>BINOL</sub> |           |           |           |
| C | 22.906508 | 4.971485 | 47.454165 | C                   | 12.487000 | 7.261000  | 26.395000 |
| C | 24.400902 | 5.182511 | 47.533824 | C                   | 11.616000 | 6.503000  | 25.622000 |
| C | 25.193657 | 5.502375 | 46.335853 | C                   | 12.086000 | 5.395000  | 24.927000 |
| C | 24.547898 | 5.634766 | 44.969559 | C                   | 13.428000 | 5.043000  | 25.007000 |
| C | 23.009984 | 5.666191 | 45.030245 | C                   | 13.027000 | 3.179000  | 23.539000 |
| C | 22.448779 | 4.641005 | 46.025055 | C                   | 11.685000 | 3.529000  | 23.460000 |
| O | 25.206830 | 4.159188 | 46.903588 | C                   | 11.215000 | 4.638000  | 24.154000 |
| C | 26.964087 | 8.618478 | 47.069929 | O                   | 10.782000 | 2.793000  | 22.654000 |
| C | 26.565824 | 9.433964 | 45.989552 | Cu                  | 18.546834 | 6.089739  | 26.015783 |
| C | 27.469877 | 9.761625 | 44.975002 | Cu                  | 17.954989 | 3.702729  | 26.532258 |
| C | 28.784783 | 9.282157 | 45.002567 | C                   | 22.221721 | 3.955531  | 26.379113 |
| C | 29.178898 | 8.452271 | 46.060672 | C                   | 22.766550 | 3.200697  | 27.433780 |
| C | 28.286450 | 8.123249 | 47.082369 | C                   | 24.120248 | 2.888283  | 27.462080 |
| N | 26.066380 | 8.261022 | 48.073963 | C                   | 24.953817 | 3.316544  | 26.434306 |
| H | 24.929083 | 6.553940 | 44.494372 | C                   | 24.447099 | 4.047483  | 25.343218 |
| H | 24.790848 | 5.511969 | 48.507283 | C                   | 23.060906 | 4.355433  | 25.300399 |

|   |           |          |           |    |           |          |           |
|---|-----------|----------|-----------|----|-----------|----------|-----------|
| C | 22.546003 | 5.021406 | 24.167608 | O  | 16.597377 | 6.405495 | 25.852812 |
| C | 23.390245 | 5.407788 | 23.131334 | O  | 16.058296 | 4.265621 | 26.320527 |
| C | 24.756825 | 5.147633 | 23.191827 | C  | 15.737331 | 5.463203 | 25.985713 |
| C | 25.297202 | 4.459639 | 24.286833 | C  | 17.924415 | 5.830664 | 30.234294 |
| O | 25.588192 | 5.540676 | 22.148733 | C  | 18.924622 | 6.581551 | 30.878813 |
| O | 20.439608 | 5.524081 | 26.186621 | C  | 16.768002 | 5.435705 | 30.964223 |
| O | 19.919014 | 3.379438 | 26.655271 | C  | 15.688000 | 4.773841 | 30.342299 |
| C | 20.774785 | 4.307341 | 26.418337 | C  | 14.574076 | 4.390798 | 31.083344 |
| C | 18.226925 | 4.022012 | 22.293999 | O  | 18.439020 | 6.410040 | 27.977569 |
| C | 18.992913 | 2.941010 | 21.873981 | O  | 17.901760 | 4.266982 | 28.434906 |
| C | 19.081888 | 2.638015 | 20.519979 | C  | 18.105369 | 5.481156 | 28.798305 |
| C | 18.404874 | 3.417021 | 19.587993 | Cu | 34.124493 | 6.060838 | 26.052446 |
| C | 17.639885 | 4.497022 | 20.008011 | Cu | 33.573411 | 3.663737 | 26.557228 |
| C | 17.550911 | 4.800017 | 21.362013 | C  | 37.829344 | 3.950924 | 26.424446 |
| C | 16.783920 | 5.881019 | 21.784030 | C  | 38.353953 | 3.233834 | 27.515671 |
| C | 16.107906 | 6.659024 | 20.850045 | C  | 39.699334 | 2.892302 | 27.565638 |
| C | 16.197881 | 6.355028 | 19.497042 | C  | 40.545037 | 3.250534 | 26.522097 |
| C | 16.963871 | 5.274029 | 19.076025 | C  | 40.059967 | 3.946261 | 25.398566 |
| O | 15.523868 | 7.185034 | 18.539057 | C  | 38.682368 | 4.290171 | 25.337575 |
| O | 18.565144 | 5.531539 | 24.111497 | C  | 38.189293 | 4.929440 | 24.181178 |
| O | 18.027501 | 3.390061 | 24.576524 | C  | 39.046602 | 5.246506 | 23.131688 |
| C | 18.266874 | 4.337585 | 23.746256 | C  | 40.405385 | 4.947803 | 23.206103 |
| C | 14.301000 | 5.801000 | 25.782000 | C  | 40.924982 | 4.291435 | 24.330667 |
| C | 13.829000 | 6.909000 | 26.476000 | O  | 41.250258 | 5.277448 | 22.151995 |
| C | 27.950197 | 7.075054 | 26.427358 | O  | 36.033617 | 5.509694 | 26.187829 |
| C | 27.117424 | 6.214070 | 25.721632 | O  | 35.535177 | 3.360534 | 26.660689 |
| C | 27.630560 | 5.080714 | 25.058485 | C  | 36.381026 | 4.296817 | 26.429748 |
| C | 29.025616 | 4.817284 | 25.126059 | C  | 33.846852 | 4.021974 | 22.293716 |
| C | 13.900000 | 3.935000 | 24.313000 | C  | 34.612829 | 2.940971 | 21.873681 |
| C | 28.703658 | 2.897126 | 23.673706 | C  | 34.701778 | 2.637980 | 20.519676 |
| C | 27.337306 | 3.118414 | 23.634416 | C  | 34.024750 | 3.416990 | 19.587706 |
| C | 26.775168 | 4.213315 | 24.328519 | C  | 33.259772 | 4.496992 | 20.007739 |
| O | 26.573393 | 2.208352 | 22.906938 | C  | 33.170822 | 4.799984 | 21.361745 |

|    |           |          |           |   |           |          |           |
|----|-----------|----------|-----------|---|-----------|----------|-----------|
| C  | 32.403844 | 5.880987 | 21.783779 | C | 54.157056 | 3.947784 | 27.515893 |
| C  | 31.727817 | 6.658997 | 20.849809 | C | 55.530058 | 3.732771 | 27.559816 |
| C  | 31.817767 | 6.355005 | 19.496804 | C | 56.316001 | 4.036773 | 26.454777 |
| C  | 32.583744 | 5.274001 | 19.075769 | C | 55.729944 | 4.554792 | 25.305813 |
| O  | 31.143737 | 7.185017 | 18.538834 | C | 54.356945 | 4.768807 | 25.262890 |
| O  | 34.128948 | 5.523957 | 24.137445 | C | 53.770888 | 5.287824 | 24.113928 |
| O  | 33.634416 | 3.370432 | 24.585422 | C | 54.557831 | 5.591827 | 23.007888 |
| C  | 33.862092 | 4.326650 | 23.758400 | C | 55.929832 | 5.377811 | 23.052810 |
| C  | 29.864466 | 5.674049 | 25.893422 | C | 56.515887 | 4.858794 | 24.200774 |
| C  | 29.310483 | 6.809784 | 26.511614 | O | 56.643767 | 5.617817 | 21.841773 |
| C  | 43.540297 | 6.893907 | 26.520540 | O | 51.635627 | 5.836587 | 26.124696 |
| C  | 42.720639 | 6.028940 | 25.807217 | O | 51.335017 | 3.659525 | 26.636974 |
| C  | 43.247078 | 4.901210 | 25.144283 | C | 52.092450 | 4.665946 | 26.381618 |
| C  | 44.644792 | 4.648037 | 25.218888 | C | 49.466776 | 4.021885 | 22.293147 |
| C  | 29.548009 | 3.727943 | 24.399721 | C | 50.232742 | 2.940881 | 21.873096 |
| C  | 44.340288 | 2.713363 | 23.783919 | C | 50.321665 | 2.637894 | 20.519088 |
| C  | 42.973802 | 2.934905 | 23.723382 | C | 49.644622 | 3.416909 | 19.587132 |
| C  | 42.401593 | 4.033594 | 24.403160 | C | 48.879655 | 4.496913 | 20.007183 |
| O  | 42.219616 | 2.018938 | 22.993449 | C | 48.790732 | 4.799902 | 21.361191 |
| O  | 32.155192 | 6.355837 | 25.938341 | C | 48.023768 | 5.880906 | 21.783244 |
| O  | 31.670699 | 4.199985 | 26.388326 | C | 47.347725 | 6.658920 | 20.849287 |
| C  | 31.315571 | 5.394918 | 26.084276 | C | 47.437649 | 6.354933 | 19.496280 |
| C  | 33.635602 | 5.761968 | 30.289241 | C | 48.203614 | 5.273930 | 19.075227 |
| C  | 34.658087 | 6.524595 | 30.884570 | O | 46.763606 | 7.184950 | 18.538323 |
| C  | 32.520495 | 5.357981 | 31.076690 | O | 49.727817 | 5.590654 | 24.092507 |
| C  | 31.422881 | 4.675674 | 30.511930 | O | 49.385362 | 3.424305 | 24.609098 |
| C  | 30.347225 | 4.290913 | 31.306680 | C | 49.524005 | 4.367999 | 23.750871 |
| O  | 34.053937 | 6.361337 | 28.018779 | C | 45.475275 | 5.526728 | 25.969128 |
| O  | 33.542052 | 4.211609 | 28.470777 | C | 44.903625 | 6.649390 | 26.596620 |
| C  | 33.752032 | 5.423401 | 28.841386 | C | 45.176689 | 3.552500 | 24.510791 |
| Cu | 49.692393 | 6.203175 | 25.987694 | O | 47.712059 | 6.333984 | 25.890297 |
| Cu | 49.343807 | 3.785031 | 26.566004 | O | 47.392621 | 4.165651 | 26.421154 |
| C  | 53.571003 | 4.464803 | 26.367930 | C | 46.945967 | 5.325926 | 26.097310 |

|    |           |          |           |   |           |          |           |
|----|-----------|----------|-----------|---|-----------|----------|-----------|
| C  | 49.199258 | 5.983800 | 30.224876 | C | 17.533677 | 2.977428 | 37.225235 |
| C  | 50.142486 | 6.827829 | 30.839179 | C | 17.539490 | 2.719546 | 35.861149 |
| C  | 48.089634 | 5.509968 | 30.980005 | C | 16.869193 | 3.571942 | 34.991188 |
| C  | 47.062006 | 4.745586 | 30.387586 | C | 16.155616 | 4.690841 | 35.468159 |
| C  | 45.990232 | 4.292550 | 31.150613 | C | 16.133138 | 4.947286 | 36.865378 |
| O  | 49.604497 | 6.561155 | 27.944603 | C | 15.360960 | 6.022934 | 37.348347 |
| O  | 49.295823 | 4.386126 | 28.458804 | C | 14.668895 | 6.843083 | 36.465763 |
| C  | 49.385023 | 5.622490 | 28.792296 | C | 14.714585 | 6.627678 | 35.098318 |
| C  | 11.158285 | 7.260976 | 41.959131 | C | 15.465404 | 5.551455 | 34.574038 |
| C  | 10.287267 | 6.502982 | 41.186143 | O | 14.018511 | 7.529003 | 34.295980 |
| C  | 10.757252 | 5.394981 | 40.491131 | O | 17.237938 | 5.542302 | 39.601919 |
| C  | 12.099252 | 5.042976 | 40.571107 | O | 16.687265 | 3.394719 | 40.017781 |
| C  | 11.698220 | 3.178982 | 39.103109 | C | 16.934910 | 4.358894 | 39.207495 |
| C  | 10.356220 | 3.528988 | 39.024134 | C | 12.972269 | 5.800972 | 41.346094 |
| C  | 9.886236  | 4.637987 | 39.718144 | C | 12.500285 | 6.908972 | 42.040106 |
| O  | 9.453202  | 2.792994 | 38.218147 | C | 26.726566 | 6.744400 | 42.191115 |
| Cu | 17.240471 | 6.055639 | 41.520235 | C | 25.879521 | 5.965474 | 41.413695 |
| Cu | 16.632994 | 3.664805 | 41.989727 | C | 26.365662 | 4.858815 | 40.687315 |
| C  | 20.898791 | 3.863413 | 41.831085 | C | 27.748248 | 4.535941 | 40.764529 |
| C  | 21.398507 | 3.015493 | 42.837334 | C | 12.571236 | 3.934978 | 39.877095 |
| C  | 22.736401 | 2.643883 | 42.859907 | C | 27.384971 | 2.737418 | 39.172824 |
| C  | 23.604580 | 3.117707 | 41.884188 | C | 26.029952 | 3.016665 | 39.120265 |
| C  | 23.145205 | 3.943051 | 40.840774 | C | 25.495166 | 4.082015 | 39.878800 |
| C  | 21.772135 | 4.306905 | 40.797142 | O | 25.247709 | 2.191626 | 38.314972 |
| C  | 21.304100 | 5.064138 | 39.701909 | O | 15.283953 | 6.397051 | 41.393525 |
| C  | 22.182551 | 5.487651 | 38.709228 | O | 14.738606 | 4.253319 | 41.828895 |
| C  | 23.536817 | 5.170779 | 38.774209 | C | 14.416929 | 5.459640 | 41.527252 |
| C  | 24.029221 | 4.389725 | 39.828256 | C | 16.696255 | 5.716550 | 45.741523 |
| O  | 24.402816 | 5.601449 | 37.775515 | C | 17.722054 | 6.447986 | 46.368897 |
| O  | 19.133179 | 5.464731 | 41.661845 | C | 18.822696 | 6.896089 | 32.227936 |
| O  | 18.590148 | 3.316678 | 42.083290 | C | 17.717563 | 6.472452 | 32.957548 |
| C  | 19.456159 | 4.238663 | 41.865390 | C | 16.678647 | 5.743383 | 32.347982 |
| C  | 16.859791 | 4.097343 | 37.744690 | C | 15.547374 | 5.340383 | 46.492940 |

|    |           |          |           |   |           |          |           |
|----|-----------|----------|-----------|---|-----------|----------|-----------|
| C  | 14.450523 | 4.685763 | 45.893780 | C | 31.360277 | 5.523898 | 34.740860 |
| C  | 13.341513 | 4.327653 | 46.654303 | O | 29.897279 | 7.489537 | 34.465938 |
| C  | 14.506011 | 4.647069 | 32.450539 | O | 32.909177 | 5.366292 | 39.898470 |
| C  | 15.547166 | 5.329859 | 33.093930 | O | 32.461152 | 3.168153 | 40.125536 |
| O  | 13.388777 | 4.254120 | 33.179069 | C | 32.687144 | 4.202858 | 39.401232 |
| O  | 17.162772 | 6.334106 | 43.487978 | C | 28.600978 | 5.308245 | 41.602817 |
| O  | 16.612533 | 4.187087 | 43.908905 | C | 28.070201 | 6.415054 | 42.292269 |
| C  | 16.836678 | 5.391049 | 44.294865 | C | 42.218613 | 7.008806 | 42.082058 |
| Cu | 32.844111 | 5.711599 | 41.861518 | C | 41.405099 | 6.125636 | 41.382636 |
| Cu | 32.336194 | 3.267486 | 42.108760 | C | 41.947492 | 5.024380 | 40.689318 |
| C  | 36.588772 | 3.673237 | 42.047473 | C | 43.353398 | 4.813971 | 40.723032 |
| C  | 37.164671 | 2.892791 | 43.066022 | C | 28.244569 | 3.481003 | 39.972366 |
| C  | 38.527243 | 2.618906 | 43.069848 | C | 43.071298 | 2.898752 | 39.256652 |
| C  | 39.337710 | 3.109499 | 42.050970 | C | 41.697234 | 3.073583 | 39.242548 |
| C  | 38.798704 | 3.867183 | 40.994056 | C | 41.109801 | 4.138328 | 39.961746 |
| C  | 37.405103 | 4.142100 | 40.980209 | O | 40.952108 | 2.149132 | 38.513842 |
| C  | 36.859378 | 4.846223 | 39.886140 | O | 30.880747 | 5.986757 | 41.724715 |
| C  | 37.678987 | 5.289097 | 38.852655 | O | 30.420245 | 3.789181 | 41.941337 |
| C  | 39.051438 | 5.054043 | 38.881843 | C | 30.052371 | 5.007399 | 41.765245 |
| C  | 39.624072 | 4.339709 | 39.943463 | C | 32.129738 | 4.977296 | 46.002666 |
| O  | 39.858168 | 5.504707 | 37.842798 | C | 33.018283 | 5.783247 | 46.693183 |
| O  | 34.758038 | 5.194604 | 41.987913 | C | 34.616794 | 6.846284 | 32.235275 |
| O  | 34.307813 | 2.995869 | 42.228957 | C | 33.549097 | 6.421476 | 33.017408 |
| C  | 35.131804 | 3.972226 | 42.104286 | C | 32.489867 | 5.680434 | 32.461319 |
| C  | 32.707022 | 4.032459 | 37.919950 | C | 30.970025 | 4.409276 | 46.635420 |
| C  | 33.429805 | 2.948353 | 37.387537 | C | 29.936671 | 3.685706 | 45.955758 |
| C  | 33.489652 | 2.731796 | 36.018390 | C | 28.804233 | 3.266848 | 46.607498 |
| C  | 32.818331 | 3.585023 | 35.151876 | C | 30.334231 | 4.568134 | 32.671807 |
| C  | 32.063223 | 4.673065 | 35.635247 | C | 31.394571 | 5.270552 | 33.261434 |
| C  | 32.003119 | 4.901147 | 37.038567 | O | 29.252987 | 4.175083 | 33.452508 |
| C  | 31.208601 | 5.959526 | 37.521706 | O | 32.706150 | 5.813923 | 43.843236 |
| C  | 30.530921 | 6.789931 | 36.636842 | O | 32.233539 | 3.610386 | 44.055999 |
| C  | 30.595139 | 6.588756 | 35.267711 | C | 32.380059 | 4.787877 | 44.551057 |



|    |           |          |           |    |           |          |           |
|----|-----------|----------|-----------|----|-----------|----------|-----------|
| Cu | 48.406404 | 6.327334 | 41.586681 | O  | 46.424806 | 6.499521 | 41.479562 |
| Cu | 48.010898 | 3.895300 | 42.073764 | O  | 46.074437 | 4.312796 | 41.903763 |
| C  | 52.242277 | 4.464613 | 41.931331 | C  | 45.644781 | 5.489759 | 41.623651 |
| C  | 52.828351 | 3.947590 | 43.079282 | C  | 47.865685 | 5.981964 | 45.801966 |
| C  | 54.201352 | 3.732569 | 43.123180 | C  | 48.826131 | 6.786788 | 46.442344 |
| C  | 54.987276 | 4.036572 | 42.018127 | C  | 50.032482 | 7.161146 | 32.183534 |
| C  | 54.401202 | 4.554594 | 40.869175 | C  | 48.974590 | 6.664968 | 32.937631 |
| C  | 53.028202 | 4.768616 | 40.826278 | C  | 47.990574 | 5.841999 | 32.357720 |
| C  | 52.442127 | 5.287638 | 39.677327 | C  | 46.728534 | 5.536357 | 46.531684 |
| C  | 53.229054 | 5.591642 | 38.571275 | C  | 45.688197 | 4.810516 | 45.913894 |
| C  | 54.601053 | 5.377620 | 38.616175 | C  | 44.590224 | 4.383306 | 46.654437 |
| C  | 55.187127 | 4.858598 | 39.764122 | C  | 45.913247 | 4.579419 | 32.511192 |
| O  | 55.314970 | 5.617627 | 37.405127 | C  | 46.902250 | 5.359500 | 33.126003 |
| O  | 50.344219 | 5.899153 | 41.721824 | O  | 44.837204 | 4.118649 | 33.261389 |
| O  | 49.989957 | 3.718225 | 42.182578 | O  | 48.313394 | 6.612843 | 43.550832 |
| C  | 50.771204 | 4.709919 | 41.953735 | O  | 47.933576 | 4.431858 | 43.987741 |
| C  | 48.225990 | 4.310401 | 37.822516 | C  | 48.055123 | 5.654130 | 44.362929 |
| C  | 48.984691 | 3.231644 | 37.332707 | C  | 9.830843  | 7.260911 | 57.522287 |
| C  | 49.038618 | 2.956804 | 35.973138 | C  | 8.959811  | 6.502921 | 56.749313 |
| C  | 48.332292 | 3.749961 | 35.076482 | C  | 9.429778  | 5.394922 | 56.054289 |
| C  | 47.535726 | 4.825082 | 35.521125 | C  | 10.771778 | 5.042912 | 56.134240 |
| C  | 47.467619 | 5.101034 | 36.913898 | C  | 10.370714 | 3.178925 | 54.666242 |
| C  | 46.618874 | 6.133126 | 37.362191 | C  | 9.028713  | 3.528933 | 54.587292 |
| C  | 45.899720 | 6.897262 | 36.451338 | C  | 8.558746  | 4.637932 | 55.281315 |
| C  | 45.983113 | 6.660015 | 35.089511 | O  | 8.125680  | 2.792944 | 53.781318 |
| C  | 46.806092 | 5.621394 | 34.599002 | Cu | 15.904420 | 6.102651 | 57.128626 |
| O  | 45.246983 | 7.501055 | 34.257849 | Cu | 15.329732 | 3.697875 | 57.562102 |
| O  | 48.440847 | 5.802375 | 39.671151 | C  | 19.591759 | 3.964485 | 57.440100 |
| O  | 48.099701 | 3.615498 | 40.103231 | C  | 20.132349 | 3.200616 | 58.490499 |
| C  | 48.255178 | 4.592561 | 39.284827 | C  | 21.479154 | 2.859456 | 58.505063 |
| C  | 44.175923 | 5.697398 | 41.477373 | C  | 22.309895 | 3.265410 | 57.466290 |
| C  | 43.590013 | 6.799657 | 42.127093 | C  | 21.808311 | 4.008079 | 56.380776 |
| C  | 43.900158 | 3.752036 | 39.975233 | C  | 20.429092 | 4.350581 | 56.355137 |

|   |           |          |           |    |           |          |           |
|---|-----------|----------|-----------|----|-----------|----------|-----------|
| C | 19.917919 | 5.034895 | 55.232578 | O  | 13.948284 | 6.416034 | 56.971100 |
| C | 20.758553 | 5.398296 | 54.184801 | O  | 13.426660 | 4.261319 | 57.379882 |
| C | 22.118970 | 5.101060 | 54.226235 | C  | 13.091934 | 5.467331 | 57.088966 |
| C | 22.656996 | 4.400184 | 55.314618 | C  | 15.283038 | 5.695841 | 61.352095 |
| O | 22.946347 | 5.476897 | 53.173350 | C  | 16.314079 | 6.385825 | 61.978046 |
| O | 17.805331 | 5.540245 | 57.289655 | C  | 17.647600 | 6.770077 | 47.717728 |
| O | 17.291827 | 3.377996 | 57.678783 | C  | 16.543021 | 6.377317 | 48.464516 |
| C | 18.144619 | 4.316594 | 57.480726 | C  | 15.481703 | 5.664123 | 47.875087 |
| C | 15.641363 | 4.160688 | 53.327180 | C  | 14.198074 | 5.242844 | 62.095148 |
| C | 16.336810 | 3.042299 | 52.832508 | C  | 13.166033 | 4.552860 | 61.469196 |
| C | 16.366360 | 2.765023 | 51.472876 | C  | 12.083068 | 4.099863 | 62.213249 |
| C | 15.696428 | 3.594493 | 50.581462 | C  | 13.292307 | 4.606810 | 48.017839 |
| C | 14.966637 | 4.714135 | 51.030949 | C  | 14.350005 | 5.285139 | 48.639142 |
| C | 14.925742 | 4.994898 | 52.423880 | O  | 12.176544 | 4.243829 | 48.763967 |
| C | 14.143521 | 6.075398 | 52.878212 | O  | 15.776881 | 6.358195 | 59.103104 |
| C | 13.460076 | 6.877451 | 51.972630 | O  | 15.274752 | 4.193738 | 59.485584 |
| C | 13.518757 | 6.635058 | 50.610142 | C  | 15.452173 | 5.398609 | 59.893338 |
| C | 14.276231 | 5.550040 | 50.113620 | Cu | 31.474123 | 5.943667 | 57.105380 |
| O | 12.828289 | 7.519461 | 49.784359 | Cu | 30.989308 | 3.542706 | 57.652040 |
| O | 15.946323 | 5.607659 | 55.202108 | C  | 35.232567 | 3.933318 | 57.490070 |
| O | 15.419052 | 3.449327 | 55.590465 | C  | 35.794650 | 3.252061 | 58.585600 |
| C | 15.670848 | 4.422146 | 54.792441 | C  | 37.147792 | 2.940345 | 58.614689 |
| C | 11.644811 | 5.800902 | 56.909215 | C  | 37.964319 | 3.293690 | 57.546536 |
| C | 11.172843 | 6.908901 | 57.603238 | C  | 37.442107 | 3.954863 | 56.418460 |
| C | 25.326270 | 6.882641 | 57.582402 | C  | 36.055949 | 4.266037 | 56.378097 |
| C | 24.490373 | 6.066245 | 56.830643 | C  | 35.524773 | 4.864495 | 55.216457 |
| C | 24.995377 | 4.956342 | 56.122467 | C  | 36.354497 | 5.180239 | 54.144470 |
| C | 26.387496 | 4.673547 | 56.187137 | C  | 37.721341 | 4.917116 | 54.199089 |
| C | 11.243746 | 3.934914 | 55.440217 | C  | 38.278255 | 4.295794 | 55.325883 |
| C | 26.053827 | 2.825773 | 54.649311 | O  | 38.537438 | 5.242094 | 53.121355 |
| C | 24.689767 | 3.065596 | 54.608883 | O  | 33.397904 | 5.443970 | 57.250083 |
| C | 24.133958 | 4.134132 | 55.348780 | O  | 32.957916 | 3.295559 | 57.784436 |
| O | 23.920505 | 2.196886 | 53.838259 | C  | 33.776840 | 4.245280 | 57.514711 |

|   |           |          |           |    |           |          |           |
|---|-----------|----------|-----------|----|-----------|----------|-----------|
| C | 31.317815 | 3.793626 | 53.422166 | C  | 29.818160 | 5.242675 | 62.094350 |
| C | 32.273227 | 2.880762 | 53.014637 | C  | 28.786107 | 4.552698 | 61.468415 |
| C | 32.318961 | 2.476693 | 51.660563 | C  | 27.703152 | 4.099704 | 62.212486 |
| C | 31.413742 | 2.983904 | 50.754852 | C  | 28.614684 | 3.510232 | 47.997282 |
| C | 30.406642 | 3.912722 | 51.146882 | C  | 29.618468 | 4.149102 | 48.732113 |
| C | 30.340648 | 4.330062 | 52.524362 | O  | 27.448907 | 3.191939 | 48.584799 |
| C | 29.269946 | 5.196606 | 52.910881 | O  | 31.385047 | 6.283120 | 59.074029 |
| C | 28.294836 | 5.562264 | 52.013498 | O  | 30.922176 | 4.127676 | 59.548174 |
| C | 28.367103 | 5.149758 | 50.660976 | C  | 31.082402 | 5.350740 | 59.904502 |
| C | 29.446675 | 4.402544 | 50.193908 | Cu | 47.040617 | 6.236209 | 57.145009 |
| O | 27.336752 | 5.488514 | 49.825465 | Cu | 46.688711 | 3.780487 | 57.537367 |
| O | 31.487547 | 5.369193 | 55.199084 | C  | 50.914822 | 4.464429 | 57.493771 |
| O | 31.096789 | 3.195387 | 55.705510 | C  | 51.500915 | 3.947400 | 58.641709 |
| C | 31.300308 | 4.141224 | 54.858468 | C  | 52.873915 | 3.732375 | 58.685585 |
| C | 27.230756 | 5.490309 | 56.990031 | C  | 53.659823 | 4.036378 | 57.580520 |
| C | 26.682635 | 6.599942 | 57.659961 | C  | 53.073729 | 4.554406 | 56.431580 |
| C | 40.882584 | 6.907888 | 57.518837 | C  | 51.700730 | 4.768431 | 56.388706 |
| C | 40.069573 | 6.049027 | 56.791490 | C  | 51.114638 | 5.287461 | 55.239765 |
| C | 40.603258 | 4.932994 | 56.115020 | C  | 51.901544 | 5.591465 | 54.133701 |
| C | 42.003687 | 4.690739 | 56.182520 | C  | 53.273543 | 5.377438 | 54.178575 |
| C | 26.903088 | 3.609556 | 55.421613 | C  | 53.859636 | 4.858411 | 55.326514 |
| C | 41.711929 | 2.782986 | 54.709035 | O  | 53.987441 | 5.617444 | 52.967515 |
| C | 40.341973 | 2.984921 | 54.667051 | O  | 48.984896 | 5.853368 | 57.297192 |
| C | 39.761238 | 4.064586 | 55.370266 | O  | 48.675122 | 3.648970 | 57.670429 |
| O | 39.593439 | 2.065704 | 53.935199 | C  | 49.436608 | 4.668492 | 57.496838 |
| O | 29.504477 | 6.196292 | 56.996382 | C  | 46.938709 | 4.340620 | 53.314417 |
| O | 29.066029 | 4.030127 | 57.451106 | C  | 47.735883 | 3.302969 | 52.797810 |
| C | 28.686613 | 5.219743 | 57.149247 | C  | 47.773007 | 3.043621 | 51.435263 |
| C | 30.903113 | 5.695671 | 61.351281 | C  | 47.011420 | 3.811608 | 50.562951 |
| C | 31.934168 | 6.385649 | 61.977217 | C  | 46.183313 | 4.851561 | 51.034569 |
| C | 32.802354 | 6.040815 | 48.065742 | C  | 46.132871 | 5.110896 | 52.430841 |
| C | 31.721552 | 5.491086 | 48.718844 | C  | 45.254446 | 6.104385 | 52.907713 |
| C | 30.780205 | 4.657693 | 48.044474 | C  | 44.486811 | 6.848153 | 52.020023 |

|   |           |          |           |   |           |          |           |
|---|-----------|----------|-----------|---|-----------|----------|-----------|
| C | 44.552527 | 6.629437 | 50.653912 | C | 30.799313 | 6.168635 | 64.089293 |
| C | 45.406244 | 5.629361 | 50.135429 | C | 29.767259 | 5.478659 | 63.464356 |
| O | 43.774509 | 7.456553 | 49.846981 | C | 27.651253 | 4.336688 | 63.581492 |
| O | 47.113769 | 5.780937 | 55.210552 | C | 28.683306 | 5.025664 | 64.206427 |
| O | 46.809834 | 3.574080 | 55.564572 | O | 26.563301 | 3.908693 | 64.360564 |
| C | 46.955038 | 4.580672 | 54.782521 | C | 47.502381 | 6.620396 | 63.345107 |
| C | 42.826963 | 5.556254 | 56.957398 | C | 46.419438 | 6.168404 | 64.088195 |
| C | 42.245899 | 6.665959 | 57.600379 | C | 45.387370 | 5.478430 | 63.463277 |
| C | 42.543663 | 3.619277 | 55.444275 | C | 43.271360 | 4.336465 | 63.580445 |
| O | 45.063253 | 6.373797 | 57.011934 | C | 44.303429 | 5.025438 | 64.205366 |
| O | 44.741558 | 4.168852 | 57.354632 | O | 42.183423 | 3.908472 | 64.359536 |
| C | 44.296603 | 5.349474 | 57.110897 | H | 12.119207 | 8.126810 | 26.936144 |
| C | 46.523187 | 5.695444 | 61.350179 | H | 10.573020 | 6.786699 | 25.566687 |
| C | 47.554254 | 6.385417 | 61.976098 | H | 13.382385 | 2.322291 | 22.983093 |
| C | 48.701743 | 7.113521 | 47.786318 | H | 9.847262  | 3.168990 | 22.677262 |
| C | 47.612921 | 6.648738 | 48.514638 | H | 22.131799 | 2.867595 | 28.247404 |
| C | 46.615394 | 5.859574 | 47.910116 | H | 24.528577 | 2.315056 | 28.288274 |
| C | 45.438244 | 5.242452 | 62.093268 | H | 26.003069 | 3.059377 | 26.491017 |
| C | 44.406178 | 4.552479 | 61.467349 | H | 21.489509 | 5.240720 | 24.056823 |
| C | 43.323236 | 4.099487 | 62.211437 | H | 22.971488 | 5.919153 | 22.275303 |
| C | 44.500927 | 4.655745 | 48.017262 | H | 19.532910 | 2.330185 | 22.589884 |
| C | 45.502545 | 5.399447 | 48.656690 | H | 19.679959 | 1.794503 | 20.190531 |
| O | 43.400717 | 4.217549 | 48.745522 | H | 18.480914 | 3.170991 | 18.536759 |
| O | 46.910650 | 6.438095 | 59.118722 | H | 16.653661 | 6.146412 | 22.827112 |
| O | 46.577509 | 4.233025 | 59.465543 | H | 15.507548 | 7.501947 | 21.163930 |
| C | 46.673877 | 5.439896 | 59.890593 | H | 14.495474 | 7.507943 | 27.087931 |
| C | 16.262151 | 6.620810 | 63.347051 | H | 27.535631 | 7.949383 | 26.918611 |
| C | 15.179185 | 6.168816 | 64.090104 | H | 26.063842 | 6.451898 | 25.683297 |
| C | 14.147147 | 5.478833 | 63.465153 | H | 14.941178 | 3.632736 | 24.314644 |
| C | 12.031142 | 4.336850 | 63.582254 | H | 29.111972 | 2.058886 | 23.125046 |
| C | 13.063181 | 5.025837 | 64.207206 | H | 19.797536 | 6.910760 | 30.326012 |
| O | 10.943178 | 3.908854 | 64.361306 | H | 15.679532 | 4.555296 | 29.279731 |
| C | 31.882266 | 6.620631 | 63.346223 | H | 13.760152 | 3.882882 | 30.584190 |

|   |           |          |           |   |           |          |           |
|---|-----------|----------|-----------|---|-----------|----------|-----------|
| H | 15.673136 | 6.862396 | 17.596219 | H | 46.741374 | 7.497436 | 21.163713 |
| H | 25.092976 | 6.055288 | 21.435881 | H | 45.528939 | 7.338612 | 27.153300 |
| H | 25.592075 | 2.428557 | 22.908305 | H | 46.237895 | 3.331837 | 24.496303 |
| H | 37.707365 | 2.946077 | 28.337371 | H | 50.976594 | 7.217260 | 30.266173 |
| H | 40.090306 | 2.346197 | 28.418166 | H | 47.061602 | 4.498745 | 29.331262 |
| H | 41.586458 | 2.966982 | 26.593190 | H | 45.215396 | 3.707692 | 30.673850 |
| H | 37.140566 | 5.183331 | 24.065824 | H | 46.906562 | 6.857623 | 17.596299 |
| H | 38.645089 | 5.737764 | 22.255866 | H | 56.056703 | 5.973765 | 21.102053 |
| H | 35.148623 | 2.328041 | 22.590729 | H | 10.790755 | 8.127468 | 42.499254 |
| H | 35.298498 | 1.793496 | 20.190440 | H | 9.244456  | 6.787020 | 41.130134 |
| H | 34.099983 | 3.170505 | 18.536575 | H | 12.054400 | 2.324783 | 38.543692 |
| H | 32.266088 | 6.144465 | 22.826001 | H | 8.520687  | 3.174423 | 38.234540 |
| H | 31.125188 | 7.500260 | 21.163991 | H | 20.737913 | 2.644085 | 43.612974 |
| H | 29.943389 | 7.483085 | 27.078908 | H | 23.105506 | 1.986310 | 43.640886 |
| H | 43.114945 | 7.761900 | 27.013950 | H | 24.641086 | 2.812059 | 41.937125 |
| H | 41.665770 | 6.259515 | 25.765447 | H | 20.258357 | 5.325000 | 39.583076 |
| H | 30.608897 | 3.508157 | 24.366058 | H | 21.799965 | 6.069477 | 37.881721 |
| H | 44.755167 | 1.869499 | 23.249034 | H | 18.069431 | 2.308542 | 37.889543 |
| H | 35.500548 | 6.860716 | 30.290272 | H | 18.070633 | 1.856276 | 35.473358 |
| H | 31.371201 | 4.441762 | 29.453881 | H | 16.897979 | 3.337765 | 33.936512 |
| H | 29.518166 | 3.766877 | 30.851012 | H | 15.267377 | 6.240203 | 38.406301 |
| H | 31.288284 | 6.858750 | 17.596665 | H | 14.082126 | 7.669529 | 36.844000 |
| H | 40.771547 | 5.779740 | 21.419289 | H | 13.168940 | 7.508407 | 42.648694 |
| H | 41.237718 | 2.236828 | 22.985160 | H | 26.337113 | 7.604514 | 42.725769 |
| H | 53.552100 | 3.700226 | 28.381372 | H | 24.838734 | 6.251161 | 41.363487 |
| H | 55.987715 | 3.326303 | 28.455816 | H | 13.612197 | 3.635024 | 39.864778 |
| H | 57.384039 | 3.866408 | 26.497975 | H | 27.773499 | 1.925226 | 38.572907 |
| H | 52.703575 | 5.454334 | 24.015997 | H | 18.590295 | 6.761864 | 45.800174 |
| H | 54.081374 | 5.977058 | 22.117060 | H | 19.607366 | 7.467024 | 32.713919 |
| H | 50.777031 | 2.334772 | 22.589528 | H | 17.673012 | 6.732058 | 34.006676 |
| H | 50.920645 | 1.795071 | 20.189831 | H | 14.425461 | 4.451740 | 44.834812 |
| H | 49.720231 | 3.170731 | 18.535998 | H | 12.514873 | 3.823436 | 46.172500 |
| H | 47.864238 | 6.135526 | 22.823731 | H | 12.727601 | 3.736949 | 32.618935 |

|   |           |          |           |   |           |          |           |
|---|-----------|----------|-----------|---|-----------|----------|-----------|
| H | 14.068441 | 7.303178 | 33.317226 | H | 49.634398 | 2.125746 | 35.609981 |
| H | 23.941466 | 6.175986 | 37.086168 | H | 48.399424 | 3.503640 | 34.026391 |
| H | 24.277959 | 2.457268 | 38.303814 | H | 46.483562 | 6.357570 | 38.414053 |
| H | 36.545916 | 2.507855 | 43.869172 | H | 45.254327 | 7.690977 | 36.803510 |
| H | 38.959518 | 2.024770 | 43.868456 | H | 44.208173 | 7.492691 | 42.686772 |
| H | 40.394049 | 2.879199 | 42.086004 | H | 44.967632 | 3.572424 | 39.918099 |
| H | 35.797377 | 5.053708 | 39.806169 | H | 49.681167 | 7.156680 | 45.887497 |
| H | 37.236449 | 5.825819 | 38.024538 | H | 50.772990 | 7.805420 | 32.646378 |
| H | 33.952861 | 2.266776 | 38.049223 | H | 48.920909 | 6.942552 | 33.981839 |
| H | 34.054771 | 1.893048 | 35.624987 | H | 45.698864 | 4.573603 | 44.855241 |
| H | 32.882188 | 3.376538 | 34.093579 | H | 43.805694 | 3.827934 | 46.158507 |
| H | 31.086607 | 6.156839 | 38.580536 | H | 44.207134 | 3.545645 | 32.720061 |
| H | 29.929382 | 7.605268 | 37.015896 | H | 45.320010 | 7.254900 | 33.285526 |
| H | 28.713896 | 7.023288 | 42.917981 | H | 54.726168 | 5.965290 | 36.662668 |
| H | 41.780842 | 7.858103 | 42.596528 | H | 9.463384  | 8.127028 | 58.062999 |
| H | 40.342168 | 6.321253 | 41.373178 | H | 7.916995  | 6.786833 | 56.693556 |
| H | 29.296552 | 3.222668 | 39.940746 | H | 10.726902 | 2.324640 | 54.106987 |
| H | 43.498490 | 2.083174 | 38.688553 | H | 7.193513  | 3.175245 | 53.796556 |
| H | 33.884316 | 6.234809 | 46.197852 | H | 19.497904 | 2.876389 | 59.307879 |
| H | 35.418414 | 7.426609 | 32.680800 | H | 21.883459 | 2.276402 | 59.326209 |
| H | 33.549612 | 6.688204 | 34.065818 | H | 23.352628 | 2.980458 | 57.509388 |
| H | 29.999646 | 3.471660 | 44.886699 | H | 18.866960 | 5.287927 | 55.140812 |
| H | 28.010573 | 2.749132 | 46.062027 | H | 20.342186 | 5.923341 | 53.335981 |
| H | 28.570459 | 3.648122 | 32.928491 | H | 16.866154 | 2.385774 | 53.514154 |
| H | 29.975397 | 7.284071 | 33.484583 | H | 16.911678 | 1.901468 | 51.105795 |
| H | 39.339665 | 6.027738 | 37.152975 | H | 15.739688 | 3.342058 | 49.531535 |
| H | 39.965279 | 2.344076 | 38.524182 | H | 14.036291 | 6.311616 | 53.930790 |
| H | 52.223594 | 3.706224 | 43.946521 | H | 12.867279 | 7.709363 | 52.328865 |
| H | 54.659162 | 3.327249 | 44.019566 | H | 11.840898 | 7.508329 | 58.212690 |
| H | 56.055302 | 3.866287 | 42.061191 | H | 24.918240 | 7.738070 | 58.110835 |
| H | 51.374702 | 5.455542 | 39.581141 | H | 23.440731 | 6.320401 | 56.794406 |
| H | 52.752492 | 5.977009 | 37.680452 | H | 12.284838 | 3.635320 | 55.428655 |
| H | 49.549331 | 2.608831 | 38.017625 | H | 26.457268 | 2.008791 | 54.065633 |

|   |           |          |           |   |           |          |           |
|---|-----------|----------|-----------|---|-----------|----------|-----------|
| H | 17.169444 | 6.737208 | 61.411057 | H | 50.894810 | 3.699324 | 59.506020 |
| H | 18.450352 | 7.328004 | 48.188746 | H | 53.331465 | 3.325223 | 59.581211 |
| H | 16.517422 | 6.647051 | 49.511634 | H | 54.727760 | 3.865509 | 57.623182 |
| H | 13.128333 | 4.376200 | 60.400628 | H | 50.047718 | 5.460894 | 55.146272 |
| H | 11.277897 | 3.574059 | 61.719498 | H | 51.425153 | 5.978025 | 53.243258 |
| H | 11.500753 | 3.729430 | 48.218831 | H | 48.336425 | 2.694774 | 53.465094 |
| H | 12.895015 | 7.281017 | 48.809648 | H | 48.394641 | 2.241382 | 51.051184 |
| H | 22.448054 | 5.983058 | 52.457045 | H | 47.062284 | 3.572906 | 49.510330 |
| H | 22.941762 | 2.426613 | 53.843477 | H | 45.135755 | 6.315668 | 53.964286 |
| H | 35.170147 | 2.966637 | 59.424739 | H | 43.819716 | 7.613644 | 52.393581 |
| H | 37.567393 | 2.420197 | 59.469429 | H | 42.863784 | 7.346266 | 58.175854 |
| H | 39.012440 | 3.032810 | 57.601580 | H | 43.607685 | 3.417139 | 55.408089 |
| H | 34.466721 | 5.085592 | 55.113623 | H | 48.405456 | 6.744451 | 61.407611 |
| H | 35.923773 | 5.640057 | 53.265387 | H | 49.453133 | 7.730764 | 48.267977 |
| H | 32.994548 | 2.454462 | 53.720668 | H | 47.546813 | 6.924220 | 49.558477 |
| H | 33.067393 | 1.745986 | 51.338985 | H | 44.382412 | 4.362805 | 60.399586 |
| H | 31.445300 | 2.651326 | 49.715689 | H | 42.519551 | 3.570987 | 61.717961 |
| H | 29.188344 | 5.553209 | 53.942158 | H | 42.764613 | 3.666659 | 48.188177 |
| H | 27.439301 | 6.168556 | 52.321726 | H | 43.834069 | 7.222086 | 48.870966 |
| H | 27.319920 | 7.242927 | 58.256892 | H | 53.398286 | 5.962655 | 52.224094 |
| H | 40.451337 | 7.766866 | 58.022610 | H | 17.068722 | 7.157168 | 63.836200 |
| H | 39.013953 | 6.275694 | 56.748343 | H | 15.148395 | 6.356891 | 65.155609 |
| H | 27.962626 | 3.375344 | 55.394991 | H | 10.262421 | 3.421460 | 63.798240 |
| H | 42.133640 | 1.957523 | 54.151180 | H | 32.689507 | 7.155789 | 63.835403 |
| H | 32.791737 | 6.730383 | 61.409683 | H | 30.768511 | 6.356513 | 65.154755 |
| H | 33.494872 | 6.691194 | 48.608848 | H | 25.881286 | 3.424216 | 63.796349 |
| H | 31.565281 | 5.721485 | 49.772907 | H | 48.307471 | 7.159256 | 63.833721 |
| H | 28.747587 | 4.377141 | 60.399311 | H | 46.387810 | 6.357434 | 65.153454 |
| H | 26.897872 | 3.574342 | 61.718324 | H | 41.497526 | 3.430340 | 63.794426 |
| H | 26.587847 | 3.089535 | 47.873525 | H | 54.922460 | 4.682685 | 55.325469 |
| H | 27.156338 | 4.643850 | 49.314557 | H | 56.249995 | 4.683082 | 39.763378 |
| H | 38.032834 | 5.712692 | 52.384884 | H | 57.578846 | 4.683534 | 24.200355 |
| H | 38.610370 | 2.277327 | 53.926626 | H | 32.654137 | 5.043583 | 18.026552 |

|   |           |          |           |                     |           |          |           |
|---|-----------|----------|-----------|---------------------|-----------|----------|-----------|
| H | 17.034744 | 5.043864 | 18.026684 | H                   | 27.925733 | 9.899918 | 44.205205 |
| H | 10.176555 | 4.915023 | 24.089519 | H                   | 30.258676 | 9.081643 | 44.592581 |
| H | 8.847975  | 4.915224 | 39.653217 | H                   | 30.699541 | 7.433417 | 46.425089 |
| H | 7.520503  | 4.915162 | 55.216475 | H                   | 28.836811 | 6.615956 | 47.843569 |
| H | 12.998757 | 5.198690 | 65.269016 | H                   | 25.403771 | 7.746244 | 47.561618 |
| H | 28.618714 | 5.198609 | 65.268102 | H                   | 26.531437 | 6.888973 | 48.494661 |
| H | 44.238270 | 5.198878 | 65.266956 |                     |           |          |           |
| H | 48.273830 | 5.043416 | 18.026052 | PC <sub>BINOL</sub> |           |          |           |
| C | 23.510621 | 4.770401 | 47.259242 | C                   | 12.487000 | 7.261000 | 26.395000 |
| C | 24.980268 | 4.534589 | 47.604918 | C                   | 11.616000 | 6.503000 | 25.622000 |
| C | 25.962896 | 5.221029 | 46.733775 | C                   | 12.086000 | 5.395000 | 24.927000 |
| C | 25.651077 | 5.472056 | 45.290147 | C                   | 13.428000 | 5.043000 | 25.007000 |
| C | 24.166036 | 5.754531 | 45.024135 | C                   | 13.027000 | 3.179000 | 23.539000 |
| C | 23.269426 | 4.738990 | 45.745467 | C                   | 11.685000 | 3.529000 | 23.460000 |
| O | 25.507750 | 3.336737 | 47.100231 | C                   | 11.215000 | 4.638000 | 24.154000 |
| C | 27.330603 | 7.791450 | 46.824154 | O                   | 10.782000 | 2.793000 | 22.654000 |
| C | 27.077456 | 8.713673 | 45.796509 | Cu                  | 18.547019 | 6.079847 | 26.021582 |
| C | 28.131595 | 9.180419 | 45.004238 | Cu                  | 17.950555 | 3.692538 | 26.530279 |
| C | 29.437545 | 8.725816 | 45.221670 | C                   | 22.217443 | 3.935680 | 26.379525 |
| C | 29.686383 | 7.804991 | 46.247411 | C                   | 22.761244 | 3.180867 | 27.434748 |
| C | 28.642153 | 7.341088 | 47.049261 | C                   | 24.113864 | 2.863528 | 27.461410 |
| N | 26.266735 | 7.202897 | 47.551824 | C                   | 24.947353 | 3.286897 | 26.431530 |
| H | 26.301465 | 6.286144 | 44.928808 | C                   | 24.441764 | 4.018720 | 25.340506 |
| H | 25.144341 | 4.678197 | 48.692462 | C                   | 23.056588 | 4.331616 | 25.299430 |
| H | 27.014140 | 5.110202 | 46.987457 | C                   | 22.542505 | 4.999080 | 24.167251 |
| H | 23.980529 | 5.736862 | 43.936299 | C                   | 23.386482 | 5.381066 | 23.129179 |
| H | 23.916130 | 6.777058 | 45.374523 | C                   | 24.752309 | 5.116314 | 23.187967 |
| H | 22.205751 | 4.932957 | 45.518452 | C                   | 25.292105 | 4.427813 | 24.283041 |
| H | 23.505480 | 3.724670 | 45.382537 | O                   | 25.583506 | 5.506229 | 22.143584 |
| H | 22.911349 | 3.996657 | 47.771166 | O                   | 20.438823 | 5.509151 | 26.191886 |
| H | 23.204169 | 5.751601 | 47.676513 | O                   | 19.913477 | 3.363641 | 26.651316 |
| H | 25.970977 | 4.572397 | 44.734500 | C                   | 20.771322 | 4.290704 | 26.419140 |
| H | 26.053402 | 9.057485 | 45.612754 | C                   | 18.226925 | 4.022012 | 22.293999 |



|   |           |          |           |    |           |          |           |
|---|-----------|----------|-----------|----|-----------|----------|-----------|
| C | 18.992913 | 2.941010 | 21.873981 | O  | 17.901252 | 4.249154 | 28.434643 |
| C | 19.081888 | 2.638015 | 20.519979 | C  | 18.103926 | 5.461868 | 28.802831 |
| C | 18.404874 | 3.417021 | 19.587993 | Cu | 34.113164 | 6.041353 | 26.061670 |
| C | 17.639885 | 4.497022 | 20.008011 | Cu | 33.572536 | 3.639437 | 26.553640 |
| C | 17.550911 | 4.800017 | 21.362013 | C  | 37.826072 | 3.941337 | 26.417809 |
| C | 16.783920 | 5.881019 | 21.784030 | C  | 38.350514 | 3.211417 | 27.500596 |
| C | 16.107906 | 6.659024 | 20.850045 | C  | 39.695750 | 2.869383 | 27.547001 |
| C | 16.197881 | 6.355028 | 19.497042 | C  | 40.541555 | 3.239436 | 26.507822 |
| C | 16.963871 | 5.274029 | 19.076025 | C  | 40.056842 | 3.948278 | 25.392390 |
| O | 15.523868 | 7.185034 | 18.539057 | C  | 38.679390 | 4.293609 | 25.335267 |
| O | 18.565360 | 5.527383 | 24.115166 | C  | 38.186908 | 4.946750 | 24.186396 |
| O | 18.021328 | 3.386118 | 24.573987 | C  | 39.044653 | 5.275483 | 23.140822 |
| C | 18.264549 | 4.335037 | 23.746600 | C  | 40.403223 | 4.974813 | 23.211759 |
| C | 14.301000 | 5.801000 | 25.782000 | C  | 40.922216 | 4.304979 | 24.328616 |
| C | 13.829000 | 6.909000 | 26.476000 | O  | 41.248487 | 5.316582 | 22.161840 |
| C | 27.935470 | 7.029671 | 26.451277 | O  | 36.024799 | 5.496539 | 26.193929 |
| C | 27.106098 | 6.173049 | 25.736358 | O  | 35.534674 | 3.341831 | 26.649885 |
| C | 27.622866 | 5.046079 | 25.065114 | C  | 36.376835 | 4.282981 | 26.425879 |
| C | 29.018451 | 4.785234 | 25.133021 | C  | 33.846852 | 4.021974 | 22.293716 |
| C | 13.900000 | 3.935000 | 24.313000 | C  | 34.612829 | 2.940971 | 21.873681 |
| C | 28.702950 | 2.875030 | 23.666115 | C  | 34.701778 | 2.637980 | 20.519676 |
| C | 27.336285 | 3.094398 | 23.625064 | C  | 34.024750 | 3.416990 | 19.587706 |
| C | 26.770501 | 4.182835 | 24.326417 | C  | 33.259772 | 4.496992 | 20.007739 |
| O | 26.575819 | 2.188347 | 22.889012 | C  | 33.170822 | 4.799984 | 21.361745 |
| O | 16.598613 | 6.400995 | 25.857564 | C  | 32.403844 | 5.880987 | 21.783779 |
| O | 16.055016 | 4.261426 | 26.321290 | C  | 31.727817 | 6.658997 | 20.849809 |
| C | 15.736569 | 5.460313 | 25.988144 | C  | 31.817767 | 6.355005 | 19.496804 |
| C | 17.925924 | 5.805591 | 30.241446 | C  | 32.583744 | 5.274001 | 19.075769 |
| C | 18.911857 | 6.582778 | 30.877078 | O  | 31.143737 | 7.185017 | 18.538834 |
| C | 16.787931 | 5.378775 | 30.983445 | O  | 34.120501 | 5.516488 | 24.144069 |
| C | 15.718252 | 4.689939 | 30.372699 | O  | 33.629795 | 3.359628 | 24.580624 |
| C | 14.625546 | 4.272114 | 31.126283 | C  | 33.856854 | 4.320614 | 23.758962 |
| O | 18.437548 | 6.393647 | 27.984864 | C  | 29.854400 | 5.638850 | 25.907256 |

|    |           |          |           |   |           |          |           |
|----|-----------|----------|-----------|---|-----------|----------|-----------|
| C  | 29.296408 | 6.767577 | 26.534690 | O | 56.643767 | 5.617817 | 21.841773 |
| C  | 43.539513 | 6.883873 | 26.543994 | O | 51.634032 | 5.834684 | 26.125395 |
| C  | 42.719174 | 6.026449 | 25.822385 | O | 51.335593 | 3.657172 | 26.636862 |
| C  | 43.244763 | 4.904791 | 25.148534 | C | 52.092100 | 4.664408 | 26.381573 |
| C  | 44.642212 | 4.649357 | 25.221431 | C | 49.466776 | 4.021885 | 22.293147 |
| C  | 29.544263 | 3.701958 | 24.400166 | C | 50.232742 | 2.940881 | 21.873096 |
| C  | 44.336046 | 2.727373 | 23.770050 | C | 50.321665 | 2.637894 | 20.519088 |
| C  | 42.969966 | 2.951937 | 23.709542 | C | 49.644622 | 3.416909 | 19.587132 |
| C  | 42.398703 | 4.045284 | 24.398665 | C | 48.879655 | 4.496913 | 20.007183 |
| O  | 42.215156 | 2.043807 | 22.970544 | C | 48.790732 | 4.799902 | 21.361191 |
| O  | 32.142702 | 6.328851 | 25.949764 | C | 48.023768 | 5.880906 | 21.783244 |
| O  | 31.667214 | 4.169578 | 26.393323 | C | 47.347725 | 6.658920 | 20.849287 |
| C  | 31.306915 | 5.364334 | 26.094452 | C | 47.437649 | 6.354933 | 19.496280 |
| C  | 33.638846 | 5.717553 | 30.298304 | C | 48.203614 | 5.273930 | 19.075227 |
| C  | 34.635271 | 6.528733 | 30.874249 | O | 46.763606 | 7.184950 | 18.538323 |
| C  | 32.553845 | 5.270095 | 31.105388 | O | 49.724663 | 5.589424 | 24.094686 |
| C  | 31.481098 | 4.530294 | 30.564571 | O | 49.385555 | 3.422073 | 24.608903 |
| C  | 30.437719 | 4.101842 | 31.379613 | C | 49.522816 | 4.366848 | 23.751541 |
| O  | 34.040998 | 6.329641 | 28.028865 | C | 45.473528 | 5.521090 | 25.978691 |
| O  | 33.547172 | 4.174139 | 28.470636 | C | 44.902756 | 6.638043 | 26.616989 |
| C  | 33.748439 | 5.385386 | 28.847503 | C | 45.173079 | 3.558782 | 24.505101 |
| Cu | 49.690191 | 6.199442 | 25.990978 | O | 47.709710 | 6.328737 | 25.896157 |
| Cu | 49.343896 | 3.780409 | 26.566535 | O | 47.392058 | 4.159033 | 26.422770 |
| C  | 53.571003 | 4.464803 | 26.367930 | C | 46.944413 | 5.319967 | 26.102568 |
| C  | 54.157056 | 3.947784 | 27.515893 | C | 49.202994 | 5.974851 | 30.229514 |
| C  | 55.530058 | 3.732771 | 27.559816 | C | 50.146593 | 6.820840 | 30.840699 |
| C  | 56.316001 | 4.036773 | 26.454777 | C | 48.096326 | 5.499641 | 30.988538 |
| C  | 55.729944 | 4.554792 | 25.305813 | C | 47.068336 | 4.732739 | 30.400115 |
| C  | 54.356945 | 4.768807 | 25.262890 | C | 45.998250 | 4.280841 | 31.166378 |
| C  | 53.770888 | 5.287824 | 24.113928 | O | 49.603771 | 6.554559 | 27.948780 |
| C  | 54.557831 | 5.591827 | 23.007888 | O | 49.295579 | 4.378994 | 28.460636 |
| C  | 55.929832 | 5.377811 | 23.052810 | C | 49.385211 | 5.614935 | 28.795762 |
| C  | 56.515887 | 4.858794 | 24.200774 | C | 11.158285 | 7.260976 | 41.959131 |

|    |           |          |           |    |           |          |           |
|----|-----------|----------|-----------|----|-----------|----------|-----------|
| C  | 10.287267 | 6.502982 | 41.186143 | O  | 14.011468 | 7.415213 | 34.299928 |
| C  | 10.757252 | 5.394981 | 40.491131 | O  | 17.262779 | 5.566902 | 39.635148 |
| C  | 12.099252 | 5.042976 | 40.571107 | O  | 16.748283 | 3.414947 | 40.074431 |
| C  | 11.698220 | 3.178982 | 39.103109 | C  | 16.986209 | 4.373059 | 39.253967 |
| C  | 10.356220 | 3.528988 | 39.024134 | C  | 12.972269 | 5.800972 | 41.346094 |
| C  | 9.886236  | 4.637987 | 39.718144 | C  | 12.500285 | 6.908972 | 42.040106 |
| O  | 9.453202  | 2.792994 | 38.218147 | C  | 26.609089 | 6.995556 | 41.959689 |
| Cu | 17.232641 | 6.108460 | 41.544465 | C  | 25.784280 | 6.123757 | 41.261154 |
| Cu | 16.653451 | 3.715220 | 42.041685 | C  | 26.305647 | 4.981971 | 40.617572 |
| C  | 20.913487 | 3.988595 | 41.951372 | C  | 27.699460 | 4.717031 | 40.704292 |
| C  | 21.454196 | 3.282429 | 43.041797 | C  | 12.571236 | 3.934978 | 39.877095 |
| C  | 22.804551 | 2.957084 | 43.080836 | C  | 27.390710 | 2.781447 | 39.269950 |
| C  | 23.637879 | 3.328415 | 42.032025 | C  | 26.025611 | 3.004901 | 39.212080 |
| C  | 23.133758 | 4.010146 | 40.907827 | C  | 25.458263 | 4.109845 | 39.885346 |
| C  | 21.752436 | 4.333963 | 40.856254 | O  | 25.267482 | 2.085958 | 38.489730 |
| C  | 21.240748 | 4.961428 | 39.700212 | O  | 15.274973 | 6.417094 | 41.389207 |
| C  | 22.083998 | 5.288914 | 38.643531 | O  | 14.751948 | 4.269799 | 41.836109 |
| C  | 23.446090 | 5.007066 | 38.707172 | C  | 14.418600 | 5.470426 | 41.524801 |
| C  | 23.982299 | 4.359655 | 39.828981 | C  | 16.642562 | 5.824836 | 45.761941 |
| O  | 24.277037 | 5.340348 | 37.643554 | C  | 17.655700 | 6.574262 | 46.388396 |
| O  | 19.128989 | 5.549261 | 41.720297 | C  | 18.815279 | 6.893722 | 32.227350 |
| O  | 18.614080 | 3.401175 | 42.181814 | C  | 17.729813 | 6.439788 | 32.967930 |
| C  | 19.466874 | 4.334748 | 41.962656 | C  | 16.704992 | 5.683012 | 32.368675 |
| C  | 16.928108 | 4.094197 | 37.793759 | C  | 15.494287 | 5.441049 | 46.509718 |
| C  | 17.636346 | 2.989216 | 37.288598 | C  | 14.405959 | 4.774449 | 45.908417 |
| C  | 17.657620 | 2.719934 | 35.926655 | C  | 13.299199 | 4.404661 | 46.666933 |
| C  | 16.967449 | 3.544671 | 35.045161 | C  | 14.565640 | 4.525044 | 32.494304 |
| C  | 16.219459 | 4.646791 | 35.508170 | C  | 15.592235 | 5.240040 | 33.125894 |
| C  | 16.183664 | 4.915994 | 36.902650 | O  | 13.468206 | 4.099733 | 33.234684 |
| C  | 15.382009 | 5.976359 | 37.371682 | O  | 17.125183 | 6.415074 | 43.505501 |
| C  | 14.672532 | 6.769313 | 36.478473 | O  | 16.590048 | 4.269006 | 43.951151 |
| C  | 14.728219 | 6.540616 | 35.113802 | C  | 16.799465 | 5.480539 | 44.321995 |
| C  | 15.508122 | 5.478417 | 34.603165 | Cu | 32.754038 | 6.068103 | 41.868996 |

|    |           |          |           |    |           |          |           |
|----|-----------|----------|-----------|----|-----------|----------|-----------|
| Cu | 32.270260 | 3.633463 | 42.225455 | C  | 41.920403 | 5.154211 | 40.846074 |
| C  | 36.508373 | 4.085778 | 42.306164 | C  | 43.320377 | 4.903020 | 40.857906 |
| C  | 37.064149 | 3.382346 | 43.389738 | C  | 28.229163 | 3.622218 | 39.991963 |
| C  | 38.421996 | 3.087770 | 43.426388 | C  | 42.941191 | 2.907074 | 39.526305 |
| C  | 39.245695 | 3.474269 | 42.373667 | C  | 41.573254 | 3.122617 | 39.537434 |
| C  | 38.726271 | 4.154239 | 41.255719 | C  | 41.038337 | 4.253102 | 40.194015 |
| C  | 37.339941 | 4.460290 | 41.214425 | O  | 40.780740 | 2.173551 | 38.895332 |
| C  | 36.814529 | 5.094959 | 40.068956 | O  | 30.795760 | 6.304049 | 41.625428 |
| C  | 37.646561 | 5.438510 | 39.008550 | O  | 30.358123 | 4.115919 | 41.951211 |
| C  | 39.011040 | 5.165397 | 39.057542 | C  | 29.979666 | 5.315756 | 41.690666 |
| C  | 39.562725 | 4.515348 | 40.170565 | C  | 31.796479 | 5.563519 | 45.998880 |
| O  | 39.830256 | 5.513016 | 37.989139 | C  | 32.454276 | 6.619756 | 46.611670 |
| O  | 34.667375 | 5.586180 | 42.115927 | C  | 34.597388 | 6.862051 | 32.221707 |
| O  | 34.233454 | 3.395371 | 42.445105 | C  | 33.557280 | 6.402975 | 33.020646 |
| C  | 35.049637 | 4.375193 | 42.305491 | C  | 32.524602 | 5.610115 | 32.486147 |
| C  | 32.779941 | 4.193737 | 38.020743 | C  | 30.744179 | 4.848131 | 46.675251 |
| C  | 33.557423 | 3.121763 | 37.545037 | C  | 29.946264 | 3.789828 | 46.122263 |
| C  | 33.645265 | 2.851773 | 36.186320 | C  | 28.960583 | 3.164963 | 46.848195 |
| C  | 32.944677 | 3.634897 | 35.276244 | C  | 30.426079 | 4.401605 | 32.739557 |
| C  | 32.134140 | 4.705997 | 35.704921 | C  | 31.454340 | 5.169356 | 33.303481 |
| C  | 32.049951 | 4.991775 | 37.095868 | O  | 29.373912 | 3.970115 | 33.539470 |
| C  | 31.206597 | 6.035211 | 37.526683 | O  | 32.507087 | 6.276767 | 43.830357 |
| C  | 30.499980 | 6.794393 | 36.602656 | O  | 32.079035 | 4.080796 | 44.145950 |
| C  | 30.583752 | 6.535850 | 35.244649 | C  | 32.159479 | 5.287783 | 44.579058 |
| C  | 31.400108 | 5.483814 | 34.769978 | Cu | 48.428951 | 6.371448 | 41.591955 |
| O  | 29.852461 | 7.368582 | 34.400164 | Cu | 48.005038 | 3.949133 | 42.101760 |
| O  | 32.918670 | 5.618077 | 39.935662 | C  | 52.242277 | 4.464613 | 41.931331 |
| O  | 32.480737 | 3.429346 | 40.257163 | C  | 52.828351 | 3.947590 | 43.079282 |
| C  | 32.723050 | 4.429187 | 39.490581 | C  | 54.201352 | 3.732569 | 43.123180 |
| C  | 28.528837 | 5.582180 | 41.471280 | C  | 54.987276 | 4.036572 | 42.018127 |
| C  | 27.966155 | 6.729797 | 42.061431 | C  | 54.401202 | 4.554594 | 40.869175 |
| C  | 42.283350 | 7.207900 | 42.110423 | C  | 53.028202 | 4.768616 | 40.826278 |
| C  | 41.427827 | 6.310953 | 41.483629 | C  | 52.442127 | 5.287638 | 39.677327 |

|   |           |          |           |    |           |          |           |
|---|-----------|----------|-----------|----|-----------|----------|-----------|
| C | 53.229054 | 5.591642 | 38.571275 | C  | 45.693847 | 4.914486 | 45.916181 |
| C | 54.601053 | 5.377620 | 38.616175 | C  | 44.591486 | 4.494850 | 46.654470 |
| C | 55.187127 | 4.858598 | 39.764122 | C  | 45.922716 | 4.572203 | 32.526178 |
| O | 55.314970 | 5.617627 | 37.405127 | C  | 46.912375 | 5.354317 | 33.137270 |
| O | 50.360827 | 5.919651 | 41.723675 | O  | 44.846834 | 4.114938 | 33.278856 |
| O | 49.982338 | 3.745832 | 42.198557 | O  | 48.344535 | 6.675313 | 43.553983 |
| C | 50.774359 | 4.726503 | 41.959680 | O  | 47.945876 | 4.501780 | 44.011005 |
| C | 48.214205 | 4.325467 | 37.845225 | C  | 48.076242 | 5.726685 | 44.374555 |
| C | 48.962489 | 3.235227 | 37.364919 | C  | 9.830843  | 7.260911 | 57.522287 |
| C | 49.017260 | 2.950343 | 36.007405 | C  | 8.959811  | 6.502921 | 56.749313 |
| C | 48.321236 | 3.744154 | 35.103266 | C  | 9.429778  | 5.394922 | 56.054289 |
| C | 47.534433 | 4.830179 | 35.538221 | C  | 10.771778 | 5.042912 | 56.134240 |
| C | 47.466738 | 5.117705 | 36.928844 | C  | 10.370714 | 3.178925 | 54.666242 |
| C | 46.630133 | 6.163674 | 37.367388 | C  | 9.028713  | 3.528933 | 54.587292 |
| C | 45.919700 | 6.927386 | 36.449206 | C  | 8.558746  | 4.637932 | 55.281315 |
| C | 46.001459 | 6.677321 | 35.089481 | O  | 8.125680  | 2.792944 | 53.781318 |
| C | 46.814654 | 5.626649 | 34.608502 | Cu | 15.899106 | 6.134775 | 57.132039 |
| O | 45.273175 | 7.517537 | 34.250102 | Cu | 15.344757 | 3.722065 | 57.548639 |
| O | 48.450176 | 5.830246 | 39.680814 | C  | 19.603518 | 4.029006 | 57.413464 |
| O | 48.077931 | 3.652411 | 40.132576 | C  | 20.161535 | 3.269719 | 58.457962 |
| C | 48.246427 | 4.620075 | 39.305249 | C  | 21.511841 | 2.942723 | 58.459553 |
| C | 44.187918 | 5.806224 | 41.535689 | C  | 22.328083 | 3.357801 | 57.412935 |
| C | 43.648572 | 6.960667 | 42.134496 | C  | 21.808877 | 4.097059 | 56.333092 |
| C | 43.814711 | 3.781770 | 40.161351 | C  | 20.426510 | 4.425728 | 56.321293 |
| O | 46.450378 | 6.567519 | 41.491475 | C  | 19.898227 | 5.108494 | 55.205533 |
| O | 46.072660 | 4.392157 | 41.945780 | C  | 20.724919 | 5.480294 | 54.149466 |
| C | 45.656435 | 5.571965 | 41.656936 | C  | 22.088118 | 5.195672 | 54.177053 |
| C | 47.880574 | 6.069587 | 45.809025 | C  | 22.643680 | 4.500152 | 55.259892 |
| C | 48.840427 | 6.875972 | 46.448201 | O  | 22.901937 | 5.577271 | 53.115874 |
| C | 50.040184 | 7.154778 | 32.185154 | O  | 17.803922 | 5.589362 | 57.287692 |
| C | 48.984931 | 6.658204 | 32.942580 | O  | 17.310332 | 3.419923 | 57.662981 |
| C | 47.999903 | 5.834140 | 32.366063 | C  | 18.154114 | 4.367366 | 57.467507 |
| C | 46.736951 | 5.635300 | 46.535534 | C  | 15.644873 | 4.222268 | 53.318341 |

|   |           |          |           |    |           |          |           |
|---|-----------|----------|-----------|----|-----------|----------|-----------|
| C | 16.358979 | 3.123331 | 52.807426 | C  | 13.166033 | 4.552860 | 61.469196 |
| C | 16.383342 | 2.860795 | 51.444824 | C  | 12.083068 | 4.099863 | 62.213249 |
| C | 15.689333 | 3.685495 | 50.567398 | C  | 13.246461 | 4.680079 | 48.031172 |
| C | 14.940623 | 4.785669 | 51.034164 | C  | 14.295961 | 5.369584 | 48.654126 |
| C | 14.905678 | 5.051340 | 52.429771 | O  | 12.136070 | 4.299705 | 48.776861 |
| C | 14.107210 | 6.112302 | 52.901698 | O  | 15.769361 | 6.374181 | 59.107718 |
| C | 13.400616 | 6.910124 | 52.010315 | O  | 15.281671 | 4.203903 | 59.476385 |
| C | 13.452452 | 6.682619 | 50.645019 | C  | 15.450865 | 5.407474 | 59.891653 |
| C | 14.226564 | 5.617556 | 50.131366 | Cu | 31.431513 | 6.055879 | 57.111198 |
| O | 12.739518 | 7.562606 | 49.833810 | Cu | 30.946072 | 3.641661 | 57.596863 |
| O | 15.944770 | 5.654739 | 55.203029 | C  | 35.193648 | 4.027408 | 57.420190 |
| O | 15.437839 | 3.488568 | 55.575445 | C  | 35.743790 | 3.292641 | 58.487010 |
| C | 15.678824 | 4.470102 | 54.784994 | C  | 37.096098 | 2.976877 | 58.516242 |
| C | 11.644811 | 5.800902 | 56.909215 | C  | 37.924968 | 3.377981 | 57.475084 |
| C | 11.172843 | 6.908901 | 57.603238 | C  | 37.416384 | 4.093808 | 56.374808 |
| C | 25.275033 | 6.985925 | 57.567666 | C  | 36.031088 | 4.412727 | 56.335375 |
| C | 24.452701 | 6.175587 | 56.794364 | C  | 35.515539 | 5.071290 | 55.199920 |
| C | 24.971896 | 5.076511 | 56.079224 | C  | 36.357879 | 5.434503 | 54.153269 |
| C | 26.364209 | 4.801015 | 56.156575 | C  | 37.722200 | 5.158545 | 54.206593 |
| C | 11.243746 | 3.934914 | 55.440217 | C  | 38.264873 | 4.479955 | 55.306921 |
| C | 26.062926 | 2.982448 | 54.576967 | O  | 38.548792 | 5.526299 | 53.150947 |
| C | 24.697217 | 3.210495 | 54.529084 | O  | 33.356488 | 5.545949 | 57.219927 |
| C | 24.124643 | 4.258228 | 55.285980 | O  | 32.916099 | 3.384253 | 57.694822 |
| O | 23.944521 | 2.350962 | 53.732502 | C  | 33.736102 | 4.339979 | 57.449136 |
| O | 13.941894 | 6.430981 | 56.976255 | C  | 31.155403 | 4.025784 | 53.370404 |
| O | 13.437083 | 4.269117 | 57.367964 | C  | 32.078252 | 3.112635 | 52.891763 |
| C | 13.093311 | 5.474551 | 57.085567 | C  | 32.083667 | 2.786112 | 51.517723 |
| C | 15.283038 | 5.695841 | 61.352095 | C  | 31.170176 | 3.363905 | 50.662332 |
| C | 16.314079 | 6.385825 | 61.978046 | C  | 30.190803 | 4.285189 | 51.132503 |
| C | 17.571307 | 6.904008 | 47.734690 | C  | 30.171550 | 4.629437 | 52.527415 |
| C | 16.470709 | 6.497772 | 48.480196 | C  | 29.141532 | 5.522162 | 52.970071 |
| C | 15.421497 | 5.766985 | 47.890595 | C  | 28.208552 | 6.028539 | 52.102886 |
| C | 14.198074 | 5.242844 | 62.095148 | C  | 28.247380 | 5.722456 | 50.710258 |

|   |           |          |           |    |           |          |           |
|---|-----------|----------|-----------|----|-----------|----------|-----------|
| C | 29.233995 | 4.866336 | 50.224756 | Cu | 47.054592 | 6.269777 | 57.152900 |
| O | 27.301470 | 6.321845 | 49.965623 | Cu | 46.680768 | 3.813404 | 57.519839 |
| O | 31.411420 | 5.537028 | 55.190241 | C  | 50.914822 | 4.464429 | 57.493771 |
| O | 31.016824 | 3.351319 | 55.638617 | C  | 51.500915 | 3.947400 | 58.641709 |
| C | 31.199914 | 4.323074 | 54.816737 | C  | 52.873915 | 3.732375 | 58.685585 |
| C | 27.191294 | 5.606316 | 56.987329 | C  | 53.659823 | 4.036378 | 57.580520 |
| C | 26.630774 | 6.705620 | 57.663164 | C  | 53.073729 | 4.554406 | 56.431580 |
| C | 40.906662 | 6.994205 | 57.570749 | C  | 51.700730 | 4.768431 | 56.388706 |
| C | 40.080709 | 6.164537 | 56.824049 | C  | 51.114638 | 5.287461 | 55.239765 |
| C | 40.598895 | 5.061149 | 56.116003 | C  | 51.901544 | 5.591465 | 54.133701 |
| C | 41.996397 | 4.798606 | 56.174554 | C  | 53.273543 | 5.377438 | 54.178575 |
| C | 26.896615 | 3.755804 | 55.375907 | C  | 53.859636 | 4.858411 | 55.326514 |
| C | 41.677085 | 2.933998 | 54.653000 | O  | 53.987441 | 5.617444 | 52.967515 |
| C | 40.310339 | 3.158115 | 54.614769 | O  | 48.995291 | 5.868321 | 57.306073 |
| C | 39.744613 | 4.226086 | 55.347381 | O  | 48.667034 | 3.663361 | 57.659070 |
| O | 39.549177 | 2.273168 | 53.854208 | C  | 49.437336 | 4.678398 | 57.497344 |
| O | 29.462436 | 6.316876 | 57.028850 | C  | 46.948365 | 4.414927 | 53.304454 |
| O | 29.023727 | 4.140893 | 57.434232 | C  | 47.746884 | 3.382963 | 52.778953 |
| C | 28.645003 | 5.337126 | 57.158798 | C  | 47.784241 | 3.135819 | 51.414317 |
| C | 30.903113 | 5.695671 | 61.351281 | C  | 47.021251 | 3.910357 | 50.549111 |
| C | 31.934168 | 6.385649 | 61.977217 | C  | 46.192032 | 4.945390 | 51.029839 |
| C | 32.117223 | 7.007940 | 47.926771 | C  | 46.142158 | 5.192853 | 52.428103 |
| C | 31.127856 | 6.343087 | 48.612724 | C  | 45.263788 | 6.182089 | 52.913994 |
| C | 30.423432 | 5.260720 | 48.018493 | C  | 44.493704 | 6.931630 | 52.033131 |
| C | 29.818160 | 5.242675 | 62.094350 | C  | 44.557732 | 6.723430 | 50.665189 |
| C | 28.786107 | 4.552698 | 61.468415 | C  | 45.412783 | 5.729188 | 50.137830 |
| C | 27.703152 | 4.099704 | 62.212486 | O  | 43.777066 | 7.555126 | 49.865608 |
| C | 28.698731 | 3.545627 | 48.185390 | O  | 47.128389 | 5.834577 | 55.214462 |
| C | 29.401022 | 4.584541 | 48.769674 | O  | 46.807629 | 3.626423 | 55.545577 |
| O | 27.730567 | 2.848893 | 48.847503 | C  | 46.962298 | 4.639843 | 54.774303 |
| O | 31.365801 | 6.338332 | 59.087913 | C  | 42.833174 | 5.634545 | 56.967050 |
| O | 30.906080 | 4.171375 | 59.509929 | C  | 42.267421 | 6.734137 | 57.640384 |
| C | 31.069490 | 5.384699 | 59.896185 | C  | 42.520858 | 3.738453 | 55.409940 |

|   |           |          |           |   |           |          |           |
|---|-----------|----------|-----------|---|-----------|----------|-----------|
| O | 45.078575 | 6.426567 | 57.018644 | C | 44.303429 | 5.025438 | 64.205366 |
| O | 44.735955 | 4.220701 | 57.334556 | O | 42.183423 | 3.908472 | 64.359536 |
| C | 44.301796 | 5.409011 | 57.107977 | H | 12.119182 | 8.126714 | 26.936293 |
| C | 46.523187 | 5.695444 | 61.350179 | H | 10.573002 | 6.786635 | 25.566800 |
| C | 47.554254 | 6.385417 | 61.976098 | H | 13.382424 | 2.322414 | 22.982938 |
| C | 48.710770 | 7.211680 | 47.789576 | H | 9.847237  | 3.168919 | 22.677402 |
| C | 47.618402 | 6.752779 | 48.516590 | H | 22.126507 | 2.851402 | 28.249846 |
| C | 46.620614 | 5.963906 | 47.912219 | H | 24.521400 | 2.290219 | 28.287946 |
| C | 45.438244 | 5.242452 | 62.093268 | H | 25.995662 | 3.025571 | 26.486722 |
| C | 44.406178 | 4.552479 | 61.467349 | H | 21.486822 | 5.223358 | 24.058724 |
| C | 43.323236 | 4.099487 | 62.211437 | H | 22.968303 | 5.893676 | 22.273610 |
| C | 44.501317 | 4.768259 | 48.016983 | H | 19.532564 | 2.329874 | 22.589886 |
| C | 45.505316 | 5.507694 | 48.657605 | H | 19.679826 | 1.794411 | 20.190552 |
| O | 43.398767 | 4.334053 | 48.744142 | H | 18.480863 | 3.170961 | 18.536769 |
| O | 46.921389 | 6.452042 | 59.127063 | H | 16.654843 | 6.146944 | 22.827187 |
| O | 46.566357 | 4.247206 | 59.452534 | H | 15.507666 | 7.502036 | 21.163935 |
| C | 46.672696 | 5.449223 | 59.888972 | H | 14.495419 | 7.507531 | 27.088398 |
| C | 16.262151 | 6.620810 | 63.347051 | H | 27.517763 | 7.898428 | 26.949808 |
| C | 15.179185 | 6.168816 | 64.090104 | H | 26.052121 | 6.409156 | 25.698087 |
| C | 14.147147 | 5.478833 | 63.465153 | H | 14.941176 | 3.632825 | 24.314054 |
| C | 12.031142 | 4.336850 | 63.582254 | H | 29.113911 | 2.041438 | 23.112353 |
| C | 13.063181 | 5.025837 | 64.207206 | H | 19.770155 | 6.936048 | 30.316215 |
| O | 10.943178 | 3.908854 | 64.361306 | H | 15.700094 | 4.476534 | 29.309420 |
| C | 31.882266 | 6.620631 | 63.346223 | H | 13.820683 | 3.741846 | 30.635735 |
| C | 30.799313 | 6.168635 | 64.089293 | H | 15.673245 | 6.862474 | 17.596218 |
| C | 29.767259 | 5.478659 | 63.464356 | H | 25.089220 | 6.023402 | 21.431914 |
| C | 27.651253 | 4.336688 | 63.581492 | H | 25.594046 | 2.406432 | 22.890299 |
| C | 28.683306 | 5.025664 | 64.206427 | H | 37.703516 | 2.913145 | 28.318229 |
| O | 26.563301 | 3.908693 | 64.360564 | H | 40.086373 | 2.313024 | 28.392987 |
| C | 47.502381 | 6.620396 | 63.345107 | H | 41.582724 | 2.954333 | 26.575544 |
| C | 46.419438 | 6.168404 | 64.088195 | H | 37.138427 | 5.202852 | 24.073749 |
| C | 45.387370 | 5.478430 | 63.463277 | H | 38.643531 | 5.777200 | 22.270781 |
| C | 43.271360 | 4.336465 | 63.580445 | H | 35.147809 | 2.327195 | 22.590634 |



|                                |                                |
|--------------------------------|--------------------------------|
| H 35.298317 1.793366 20.190458 | H 9.244488 6.787028 41.130105  |
| H 34.099982 3.170511 18.536576 | H 12.054331 2.324316 38.544409 |
| H 32.266176 6.144468 22.825995 | H 8.520945 3.175045 38.233737  |
| H 31.124902 7.500044 21.164029 | H 20.818561 2.991858 43.870700 |
| H 29.926694 7.438006 27.108301 | H 23.210710 2.413788 43.928460 |
| H 43.114812 7.747300 27.045904 | H 24.684251 3.062341 42.098161 |
| H 41.664453 6.258200 25.782936 | H 20.187686 5.196703 39.588686 |
| H 30.605518 3.483888 24.367886 | H 21.668488 5.770980 37.768988 |
| H 44.750125 1.887413 23.228489 | H 18.187162 2.342104 37.962134 |
| H 35.454118 6.897011 30.265953 | H 18.215894 1.869096 35.549707 |
| H 31.422176 4.282504 29.510603 | H 17.008890 3.302653 33.992672 |
| H 29.630299 3.530153 30.942746 | H 15.279215 6.202988 38.426767 |
| H 31.288122 6.858639 17.596684 | H 14.063923 7.584696 36.846107 |
| H 40.770488 5.829507 21.436041 | H 13.168602 7.509812 42.647913 |
| H 41.233844 2.264349 22.961768 | H 26.192183 7.878101 42.434381 |
| H 53.552100 3.699994 28.381302 | H 24.732000 6.363606 41.208676 |
| H 55.987736 3.326422 28.455857 | H 13.612404 3.634370 39.870215 |
| H 57.384029 3.866332 26.497940 | H 27.803206 1.936588 38.734839 |
| H 52.703587 5.454656 24.016282 | H 18.523250 6.894103 45.821624 |
| H 54.081380 5.977068 22.117060 | H 19.589122 7.485477 32.705768 |
| H 50.776916 2.334657 22.589513 | H 17.689419 6.697202 34.017826 |
| H 50.920702 1.795117 20.189820 | H 14.386246 4.540671 44.849151 |
| H 49.720203 3.170716 18.535998 | H 12.478541 3.892121 46.183710 |
| H 47.864061 6.135562 22.823666 | H 12.815767 3.564219 32.681624 |
| H 46.741281 7.497370 21.163719 | H 14.075941 7.185457 33.322975 |
| H 45.528733 7.321852 27.179536 | H 23.788428 5.838901 36.914919 |
| H 46.233944 3.336125 24.490982 | H 24.289645 2.318712 38.463170 |
| H 50.978163 7.211765 30.264973 | H 36.432040 3.068153 44.213107 |
| H 47.066189 4.483268 29.344416 | H 38.838990 2.552873 44.273487 |
| H 45.222925 3.694338 30.692452 | H 40.296829 3.225635 42.432534 |
| H 46.906415 6.857530 17.596309 | H 35.759298 5.325885 39.970086 |
| H 56.056717 5.973824 21.102067 | H 37.219441 5.924104 38.141476 |
| H 10.790811 8.127539 42.499176 | H 34.100215 2.492540 38.241978 |

|                                |                                |
|--------------------------------|--------------------------------|
| H 34.254000 2.024701 35.835880 | H 45.705527 4.676033 44.857907 |
| H 33.029791 3.385323 34.228131 | H 43.805106 3.943073 46.157457 |
| H 31.069414 6.276661 38.574466 | H 44.214529 3.542794 32.739214 |
| H 29.860554 7.598336 36.942354 | H 45.343437 7.261772 33.280009 |
| H 28.590688 7.417288 42.618800 | H 54.726256 5.965734 36.662805 |
| H 41.883264 8.098387 42.584478 | H 9.463414 8.127108 58.062888  |
| H 40.371251 6.538466 41.487361 | H 7.917030 6.786923 56.693410  |
| H 29.291151 3.407800 39.962556 | H 10.726914 2.324723 54.106887 |
| H 43.327803 2.043043 39.002402 | H 7.194066 3.176657 53.794698  |
| H 33.239471 7.179698 46.092655 | H 19.538209 2.939046 59.281228 |
| H 35.379101 7.480720 32.650938 | H 21.930126 2.363434 59.276497 |
| H 33.558875 6.682813 34.065465 | H 23.373461 3.082432 57.445571 |
| H 30.071436 3.447805 45.094604 | H 18.844410 5.353224 55.125265 |
| H 28.361052 2.365988 46.405286 | H 20.295454 6.002041 53.305051 |
| H 28.710343 3.404265 33.032034 | H 16.907129 2.471196 53.478333 |
| H 29.955536 7.132244 33.428229 | H 16.943688 2.012852 51.064365 |
| H 39.328003 6.001419 37.262867 | H 15.730039 3.444768 49.514628 |
| H 39.798734 2.388282 38.935426 | H 14.005832 6.336670 53.957344 |
| H 52.223954 3.708821 43.947495 | H 12.796107 7.727602 52.380016 |
| H 54.659246 3.327752 44.019750 | H 11.840562 7.509284 58.212196 |
| H 56.055342 3.866532 42.061269 | H 24.856693 7.833971 58.099910 |
| H 51.374537 5.454189 39.580498 | H 23.402946 6.427595 56.745010 |
| H 52.752452 5.976600 37.680299 | H 12.284900 3.635784 55.428251 |
| H 49.519560 2.611903 38.055517 | H 26.478535 2.178942 53.983722 |
| H 49.606166 2.111263 35.651617 | H 17.168904 6.738560 61.411036 |
| H 48.388970 3.490326 34.054990 | H 18.364606 7.475742 48.205194 |
| H 46.497714 6.399337 38.417281 | H 16.438605 6.770802 49.526244 |
| H 45.283096 7.731438 36.793853 | H 13.131122 4.374015 60.400782 |
| H 44.299489 7.666801 42.638030 | H 11.278111 3.573697 61.719554 |
| H 44.874035 3.568860 40.079834 | H 11.467282 3.777325 48.230641 |
| H 49.699143 7.239469 45.894823 | H 12.807301 7.337786 48.855940 |
| H 50.781158 7.800455 32.645326 | H 22.394412 6.085805 52.407174 |
| H 48.933948 6.936716 33.986694 | H 22.963695 2.572973 53.732568 |

|   |           |          |           |   |           |          |           |
|---|-----------|----------|-----------|---|-----------|----------|-----------|
| H | 35.110002 | 2.969039 | 59.305051 | H | 43.825807 | 7.693179 | 52.413430 |
| H | 37.505344 | 2.415833 | 59.349984 | H | 42.895701 | 7.392386 | 58.230048 |
| H | 38.971864 | 3.110766 | 57.528400 | H | 43.581992 | 3.521714 | 55.370243 |
| H | 34.460434 | 5.304909 | 55.097705 | H | 48.405000 | 6.745877 | 61.407749 |
| H | 35.939106 | 5.941308 | 53.294700 | H | 49.461708 | 7.829846 | 48.270705 |
| H | 32.811755 | 2.640012 | 53.553425 | H | 47.549214 | 7.033093 | 49.558974 |
| H | 32.815913 | 2.069157 | 51.133367 | H | 44.381545 | 4.363548 | 60.399562 |
| H | 31.185729 | 3.101942 | 49.602782 | H | 42.519788 | 3.570628 | 61.718002 |
| H | 29.079254 | 5.816663 | 54.021913 | H | 42.761326 | 3.785431 | 48.186165 |
| H | 27.418916 | 6.699578 | 52.450067 | H | 43.837275 | 7.329226 | 48.887579 |
| H | 27.257883 | 7.343088 | 58.276585 | H | 53.398456 | 5.963496 | 52.224344 |
| H | 40.487843 | 7.845194 | 58.098087 | H | 17.068503 | 7.157553 | 63.836130 |
| H | 39.027665 | 6.404405 | 56.790458 | H | 15.148388 | 6.356890 | 65.155605 |
| H | 27.957565 | 3.528443 | 55.357630 | H | 10.261923 | 3.422363 | 63.798053 |
| H | 42.086995 | 2.117685 | 54.073463 | H | 32.689061 | 7.156643 | 63.835271 |
| H | 32.789308 | 6.735546 | 61.409148 | H | 30.768422 | 6.356741 | 65.154751 |
| H | 32.639541 | 7.849096 | 48.391675 | H | 25.880553 | 3.425738 | 63.795966 |
| H | 30.860724 | 6.650785 | 49.625625 | H | 48.307452 | 7.159311 | 63.833721 |
| H | 28.748018 | 4.375219 | 60.399923 | H | 46.387683 | 6.357709 | 65.153410 |
| H | 26.897838 | 3.574478 | 61.718314 | H | 41.497626 | 3.430184 | 63.794469 |
| H | 26.051044 | 2.687539 | 47.720988 | H | 54.922479 | 4.682742 | 55.325487 |
| H | 27.677583 | 3.170225 | 49.770713 | H | 56.250002 | 4.683110 | 39.763375 |
| H | 38.053484 | 6.035092 | 52.433741 | H | 57.578847 | 4.683537 | 24.200346 |
| H | 38.570283 | 2.503340 | 53.846287 | H | 32.654118 | 5.043575 | 18.026556 |
| H | 50.894839 | 3.701157 | 59.506514 | H | 17.034742 | 5.043871 | 18.026690 |
| H | 53.331486 | 3.325295 | 59.581237 | H | 10.176556 | 4.915021 | 24.089556 |
| H | 54.727820 | 3.865868 | 57.623315 | H | 8.848001  | 4.915219 | 39.653207 |
| H | 50.047784 | 5.461369 | 55.146518 | H | 7.520517  | 4.915191 | 55.216425 |
| H | 51.425244 | 5.978249 | 53.243299 | H | 12.998699 | 5.198773 | 65.268995 |
| H | 48.348044 | 2.769632 | 53.441023 | H | 28.618657 | 5.198752 | 65.268129 |
| H | 48.406838 | 2.337799 | 51.023092 | H | 44.238277 | 5.198914 | 65.266967 |
| H | 47.072529 | 3.680802 | 49.494613 | H | 48.273815 | 5.043414 | 18.026050 |
| H | 45.147245 | 6.385507 | 53.972403 | C | 23.815057 | 4.954228 | 47.672452 |

C 25.266024 4.457090 47.652750  
C 26.144032 5.260710 46.655870  
C 25.482427 5.342985 45.265011  
C 24.029136 5.831276 45.312808  
C 23.195424 4.967268 46.269171  
O 25.265003 3.084420 47.302029  
C 27.434976 7.439064 46.735644  
C 27.480604 8.755692 47.238243  
C 28.452409 9.653939 46.799015  
C 29.403946 9.264236 45.848292  
C 29.362515 7.960767 45.346685  
C 28.389178 7.053266 45.777072  
N 26.496462 6.541998 47.280144  
H 26.087922 5.979467 44.598854  
H 25.699298 4.590008 48.662483  
H 27.082426 4.700779 46.552098  
H 23.597902 5.811588 44.295526  
H 23.998360 6.887588 45.649590  
H 22.151156 5.326839 46.313803  
H 23.164612 3.929231 45.894735  
H 23.241187 4.303231 48.354820  
H 23.783817 5.975501 48.103453  
H 25.501983 4.323593 44.838834  
H 26.754506 9.062801 47.999208  
H 28.468058 10.668909 47.210048  
H 30.171633 9.964792 45.506560  
H 30.108350 7.638259 44.613745  
H 28.386931 6.039440 45.375156  
H 25.695274 7.024381 47.682130  
H 27.343535 6.165351 48.986091
