# Supplementary material for: The mechanism of an asymmetric ring-opening reaction of epoxide with amine catalyzed by a metal–organic framework: insights from combined quantum mechanics and molecular mechanics calculations
Source: Royal Society of Chemistry journal article supplement (doi:10.1039/c6dt04745a), 2017-01-01
Supplement: c6dt04745a2.pdf [file c6dt04745a2.pdf]

*Electronic Supplemental Information*

**Mechanism of an asymmetric ring-opening reaction of  
epoxide with amine catalyzed by a metal-organic framework:  
insights from combined quantum mechanics and molecular  
mechanics calculations**

Kazuki Doitomi,<sup>1,2</sup> Kai Xu,<sup>1,2</sup> and Hajime Hirao\*<sup>1,2</sup>

<sup>1</sup>*Department of Biology and Chemistry, City University of Hong Kong, Tat Chee*

*Avenue, Kowloon Tong, Hong Kong, China*

<sup>2</sup>*Division of Chemistry and Biological Chemistry, School of Physical and Mathematical*

*Sciences, Nanyang Technological University, 21 Nanyang Link, Singapore 637371*

**Contents**

- QM/MM and QM energies of key species obtained using B3LYP-D3/SV(P) as the QM method S3
- QM/MM and QM energies of key species obtained using B3LYP-D3/TZVP as the QM method S4
- Energy difference between the triplet and open-shell singlet states of RCs S5
- Effects of zero-point energy and thermal corrections on the relative energies of (*R,R*)-2-TS1 and (*S,S*)-1-TS1 S6
- Relative QM/MM energies of RC, TS1, and Int1 in the four possible pathways using the B3LYP-D3 or B3LYP functional for the QM part S7
- Relative energies obtained from single-point QM/MM calculations with M06-2X/TZVP or M06-2X-D3/TZVP used as the QM method S8
- Relative energies obtained from single-point QM/MM calculations with B3PW91/TZVP or B3PW91-D3/TZVP used as the QM method S9
- Effect of NH<sub>2</sub> substituents on the energy gap between (*R,R*)-2-TS1 and (*S,S*)-1-TS1 S10
- Optimized structures of lithium 6-hydroxy-1-naphthoate and Cu<sub>2</sub>(O<sub>2</sub>CH)<sub>4</sub> S11
- Atomic charges assigned to the Cu-paddlewheel unit and the linker S13
- A possible structure of RC S14
- Optimized structures of (*R,R*)-1-TS1 and (*R,R*)-2-TS1 obtained using the QM(B3LYP)/MM method S15

|                                                                                                              |     |
|--------------------------------------------------------------------------------------------------------------|-----|
| • Optimized structures of RC species obtained using an extended QM region                                    | S16 |
| • Energy diagram and optimized structures of key species for the H-bond assisted ring-opening reaction (DFT) | S17 |
| • Optimized structures of key species in the proton transfer step                                            | S18 |
| • Optimized structures of ( <i>S,S</i> )-1-Int3-2 and ( <i>R,R</i> )-2-Int3-2                                | S19 |
| • XYZ coordinates of lithium 6-hydroxy-1-naphthoate and $\text{Cu}_2(\text{O}_2\text{CH})_4$                 | S20 |
| • XYZ coordinates of key species of H-bond assisted ring-opening reaction                                    | S21 |
| • XYZ coordinates of the QM atoms in the QM/MM-optimized structures                                          | S26 |

**Table S1** QM/MM and QM energies of key species (in kcal/mol) in the four possible pathways, obtained from QM/MM calculations using B3LYP-D3/SV(P) as the QM method

|         | RC  | TS1  | Int1 | Int2 | Int3 | Int3-2 | TS3 | PC    |
|---------|-----|------|------|------|------|--------|-----|-------|
| (R,R)-1 |     |      |      |      |      |        |     |       |
| QM/MM   | 0.0 | 20.6 | -1.3 | -    | -    | -      | -   | -     |
| QM      | 0.0 | 20.1 | -3.2 | -    | -    | -      | -   | -     |
| (R,R)-2 |     |      |      |      |      |        |     |       |
| QM/MM   | 3.1 | 19.8 | -3.7 | -2.5 | 4.7  | 7.3    | 5.7 | -13.9 |
| QM      | 1.9 | 18.8 | -5.4 | -4.4 | 2.7  | 6.0    | 3.3 | -14.6 |
| (S,S)-1 |     |      |      |      |      |        |     |       |
| QM/MM   | 0.4 | 21.5 | -1.7 | -    | 4.7  | 5.4    | 5.0 | -14.1 |
| QM      | 1.4 | 22.4 | -1.2 | -    | 5.9  | 6.0    | 6.4 | -13.0 |
| (S,S)-2 |     |      |      |      |      |        |     |       |
| QM/MM   | 5.6 | -    | -    | -    | -    | -      | -   | -     |
| QM      | 6.4 | -    | -    | -    | -    | -      | -   | -     |

**Table S2** QM/MM and QM energies of key species (in kcal/mol) in the four possible pathways, obtained from single-point QM/MM calculations using B3LYP-D3/TZVP as the QM method

|         | RC  | TS1  | Int1 | Int2 | Int3 | Int3-2 | TS3 | PC    |
|---------|-----|------|------|------|------|--------|-----|-------|
| (R,R)-1 |     |      |      |      |      |        |     |       |
| QM/MM   | 0.0 | 17.4 | -2.7 | -    | -    | -      | -   | -     |
| QM      | 0.0 | 17.0 | -4.5 | -    | -    | -      | -   | -     |
| (R,R)-2 |     |      |      |      |      |        |     |       |
| QM/MM   | 2.3 | 16.6 | -4.0 | -2.1 | 4.2  | 5.8    | 5.8 | -16.1 |
| QM      | 1.2 | 15.6 | -5.7 | -4.1 | 2.2  | 4.4    | 3.4 | -16.8 |
| (S,S)-1 |     |      |      |      |      |        |     |       |
| QM/MM   | 0.9 | 17.9 | -2.6 | -    | 4.0  | 4.2    | 4.2 | -16.1 |
| QM      | 1.8 | 18.8 | -2.0 | -    | 5.2  | 4.7    | 5.7 | -14.9 |
| (S,S)-2 |     |      |      |      |      |        |     |       |
| QM/MM   | 3.6 | -    | -    | -    | -    | -      | -   | -     |
| QM      | 4.4 | -    | -    | -    | -    | -      | -   | -     |

**Table S3** Energy differences (in kcal/mol) between the triplet and open-shell singlet states of RCs <sup>a</sup>

| spin state         | ( <i>R,R</i> )-1-RC | ( <i>R,R</i> )-2-RC | ( <i>S,S</i> )-1-RC | ( <i>S,S</i> )-2-RC |
|--------------------|---------------------|---------------------|---------------------|---------------------|
| triplet            | 0.0                 | 0.0                 | 0.0                 | 0.0                 |
| open-shell singlet | -0.6                | -0.6                | -0.6                | -0.6                |

<sup>a</sup> The open-shell singlet state was described using a broken-symmetry approach.

**Table S4** Relative energies (in kcal/mol) of (*R,R*)-2-TS1 and (*S,S*)-1-TS1 in the triplet and open-shell singlet states, with respect to (*R,R*)-2-TS1 in the triplet state <sup>a</sup>

|                    | ( <i>R,R</i> )-2-TS1 | ( <i>S,S</i> )-1-TS1 |
|--------------------|----------------------|----------------------|
| triplet            | 0.0                  | 1.2                  |
| open-shell singlet | -0.2                 | 1.0                  |

<sup>a</sup> The energies in the open-shell singlet state were calculated for the structures optimized in the triplet state. The open-shell singlet state was described using a broken-symmetry approach.

\* The open-shell singlet state is more stable in both (*R,R*)-2-TS1 and (*S,S*)-1-TS1. Thus, the spin multiplicity hardly affects the energy difference between (*R,R*)-2-TS1 and (*S,S*)-1-TS1.

**Table S5** Relative energies (kcal/mol) of (*R,R*)-2-TS1 and (*S,S*)-1-TS1 obtained with various methods.

(a) SV(P)<sup>a</sup>

|                                               | ( <i>R,R</i> )-2-TS1 | ( <i>S,S</i> )-1-TS1 |
|-----------------------------------------------|----------------------|----------------------|
| E(QM/MM)                                      | 0.0                  | 1.7                  |
| E(QM/MM)+ ZPE <sup>b</sup>                    | 0.0                  | 1.5                  |
| E(QM/MM)+ enthalpy correction <sup>c</sup>    | 0.0                  | 1.6                  |
| E(QM/MM)+ free energy correction <sup>d</sup> | 0.0                  | -0.2                 |

(b) TZVP<sup>e</sup>

|                                               | ( <i>R,R</i> )-2-TS1 | ( <i>S,S</i> )-1-TS1 |
|-----------------------------------------------|----------------------|----------------------|
| E(QM/MM)                                      | 0.0                  | 1.3                  |
| E(QM/MM)+ ZPE <sup>b</sup>                    | 0.0                  | 1.1                  |
| E(QM/MM)+ enthalpy correction <sup>c</sup>    | 0.0                  | 1.2                  |
| E(QM/MM)+ free energy correction <sup>d</sup> | 0.0                  | -0.6                 |

<sup>a</sup> E(QM/MM) = E(B3LYP-D3/SV(P)/MM)

<sup>b</sup> QM/MM energy with zero-point energy corrections for the QM atoms

<sup>c</sup> QM/MM energy with enthalpy correction for the QM atoms

<sup>d</sup> QM/MM energy with Gibbs free energy correction for the QM atoms

<sup>e</sup> E(QM/MM) = E(B3LYP-D3/TZVP/MM//B3LYP-D3/SV(P)/MM)

\* Thermal corrections were obtained for the QM atoms. For this purpose, geometry optimization and vibrational frequency calculations were performed for the QM atoms at the B3LYP-D3/SV(P) level using Gaussian 09. Here, B3LYP is as implemented in Gaussian 09; thus it is different from the B3LYP used in QM/MM calculations. During the geometry optimization, the hydroxy oxygen atoms of the four naphthol moieties were kept frozen.

**Table S6** QM/MM energy and its components (QM(B3LYP-D3), D3 dispersion energy, and MM energy) in hartree for RC, TS1, and Int1 in the four pathways

| method       |                  | RC           | TS1          | Int1         |
|--------------|------------------|--------------|--------------|--------------|
| QM/MM        | ( <i>R,R</i> )-1 | -6472.355942 | -6472.323123 | -6472.358091 |
|              | ( <i>R,R</i> )-2 | -6472.351039 | -6472.324391 | -6472.361856 |
|              | ( <i>S,S</i> )-1 | -6472.355276 | -6472.321658 | -6472.358638 |
|              | ( <i>S,S</i> )-2 | -6472.347003 | -            | -            |
| QM(B3LYP-D3) | ( <i>R,R</i> )-1 | -6470.326788 | -6470.294721 | -6470.331889 |
|              | ( <i>R,R</i> )-2 | -6470.323692 | -6470.2969   | -6470.323692 |
|              | ( <i>S,S</i> )-1 | -6470.324601 | -6470.291021 | -6470.328642 |
|              | ( <i>S,S</i> )-2 | -6470.316654 | -            | -            |
| D3           | ( <i>R,R</i> )-1 | -0.1737586   | -0.17846929  | -0.18009431  |
|              | ( <i>R,R</i> )-2 | -0.16817506  | -0.17797725  | -0.18058663  |
|              | ( <i>S,S</i> )-1 | -0.17515605  | -0.17114458  | -0.1770756   |
|              | ( <i>S,S</i> )-2 | -0.15608726  | -            | -            |
| MM           | ( <i>R,R</i> )-1 | -2.029154413 | -2.02840191  | -2.026201676 |
|              | ( <i>R,R</i> )-2 | -2.027347289 | -2.027490718 | -2.026466773 |
|              | ( <i>S,S</i> )-1 | -2.03067541  | -2.030637444 | -2.029995895 |
|              | ( <i>S,S</i> )-2 | -2.030348904 | -            | -            |

**Table S7** Relative QM/MM and QM energies (in kcal/mol) of key species in the ring-opening step, as obtained from single-point QM/MM calculations with M06-2X/TZVP used as the QM method

|                 | RC  | TS1  | Int1 |
|-----------------|-----|------|------|
| <i>(R,R)</i> -1 |     |      |      |
| QM/MM           | 0.0 | 24.0 | -0.7 |
| QM              | 0.0 | 23.5 | -2.5 |
| <i>(R,R)</i> -2 |     |      |      |
| QM/MM           | 3.5 | 22.3 | -2.7 |
| QM              | 2.3 | 21.3 | -4.4 |
| <i>(S,S)</i> -1 |     |      |      |
| QM/MM           | 2.3 | 22.1 | -2.2 |
| QM              | 3.2 | 23.1 | -1.7 |
| <i>(S,S)</i> -2 |     |      |      |
| QM/MM           | 3.5 | -    | -    |
| QM              | 4.2 | -    | -    |

\* With this method, the energy of *(R,R)*-2-TS1 was slightly higher than that of *(S,S)*-1-TS1.

**Table S8** Relative QM/MM and QM energies (in kcal/mol) of TS1 species, as obtained from single-point QM/MM calculations with M06-2X-D3/TZVP used as the QM method

|       | <i>(R,R)</i> -2-TS1 | <i>(R,R)</i> -1-TS1 | <i>(S,S)</i> -1-TS1 |
|-------|---------------------|---------------------|---------------------|
| QM/MM | 0.0                 | 2.0                 | 0.1                 |
| QM    | 0.0                 | 2.6                 | 2.1                 |

<sup>a</sup> QM calculations were performed using Gaussian 09. Relative energies are with respect to *(R,R)*-2-TS1.

\* *(R,R)*-2-TS1 was calculated as slightly more stable than *(S,S)*-1-TS1. These results also indicate that CH- $\pi$  interactions affect the stability of TS1.



**Table S9** Relative QM/MM and QM energies (in kcal/mol) of key species in the ring-opening step, as obtained from single-point QM/MM calculations with B3PW91/TZVP used as the QM method <sup>a</sup>

|       | RC              | TS1  | Int1 |
|-------|-----------------|------|------|
|       | <i>(R,R)</i> -1 |      |      |
| QM/MM | 0.0             | 22.3 | 1.1  |
| QM    | 0.0             | 21.9 | -0.7 |
|       | <i>(R,R)</i> -2 |      |      |
| QM/MM | -0.3            | 21.7 | 0.3  |
| QM    | -1.4            | 20.6 | -1.4 |
|       | <i>(S,S)</i> -1 |      |      |
| QM/MM | 2.0             | 17.8 | -1.5 |
| QM    | 3.0             | 18.7 | -1.0 |
|       | <i>(S,S)</i> -2 |      |      |
| QM/MM | -8.0            | -    | -    |
| QM    | -7.3            | -    | -    |

<sup>a</sup> QM energies were calculated using Gaussian 09.

\* With this method, the energy of *(R,R)*-2-TS1 was calculated as higher than that of *(S,S)*-1-TS1.

**Table S10** Relative QM/MM and QM energies (in kcal/mol) of TS1 species, as obtained from single-point QM/MM calculations with B3PW91-D3/TZVP used as the QM method

|       | <i>(R,R)</i> -2-TS1 | <i>(R,R)</i> -1-TS1 | <i>(S,S)</i> -1-TS1 |
|-------|---------------------|---------------------|---------------------|
| QM/MM | 0.0                 | 0.3                 | 1.1                 |
| QM    | 0.0                 | 0.9                 | 3.1                 |

<sup>a</sup> QM calculations were performed using Gaussian 09. Relative energies are with respect to *(R,R)*-2-TS1.

\* The energy of *(R,R)*-2-TS1 was lower than that of *(S,S)*-1-TS1 in the B3PW91-D3 results, whereas the energy of *(R,R)*-2-TS1 was higher in B3PW91 results. These results also indicate that CH- $\pi$  interactions affect the stability of TS1.

**Table S11** Effect of NH<sub>2</sub> substituents on the energy gap between (*R,R*)-2-TS1 and (*S,S*)-1-TS1.

|                         | ( <i>R,R</i> )-2-TS1 | ( <i>S,S</i> )-1-TS1 |
|-------------------------|----------------------|----------------------|
| without NH <sub>2</sub> | 0.0                  | 2.3                  |
| with NH <sub>2</sub>    | 0.0                  | 3.1                  |

<sup>a</sup> NH<sub>2</sub> substituents were attached at the C3 positions of naphthol groups. DFT calculations were performed for the QM region of the transition states. Relative energies (kcal/mol) are with respect to (*R,R*)-2-TS1.

\* QM atoms were taken from the QM/MM optimized structures of (*R,R*)-2-TS1 and (*S,S*)-1-TS1. QM energies of (*R,R*)-2-TS1 and (*S,S*)-1-TS1 were calculated without point charges. NH<sub>2</sub> groups were attached at the C3 positions of the four ligands of the QM structures. After NH<sub>2</sub> groups had been introduced, the geometries of the four NH<sub>2</sub> groups were optimized, while the other atoms were kept frozen at the original positions.

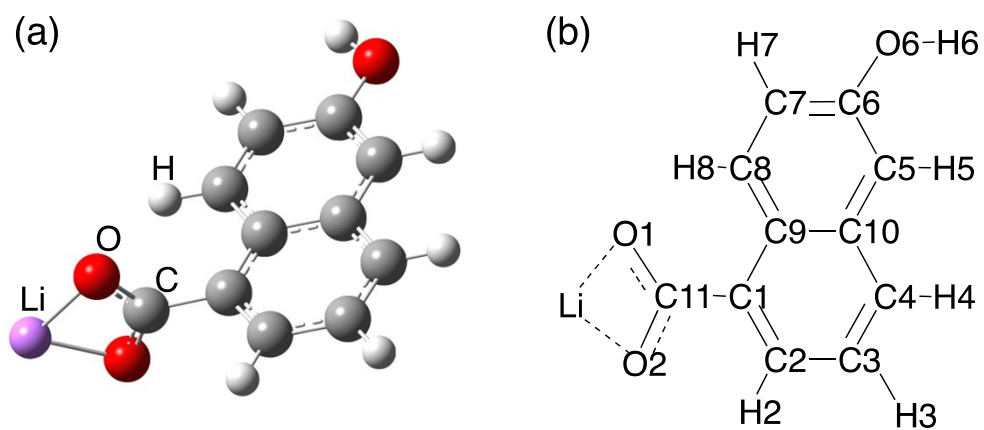

**Fig. S1** (a) Optimized structure of lithium 6-hydroxy-1-naphthoate. (b) Atom labels .

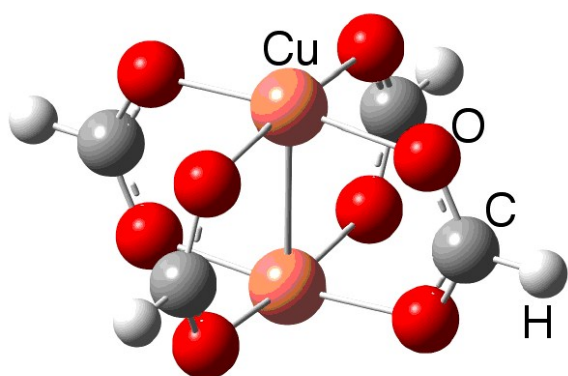

**Fig. S2** Optimized structure of  $\text{Cu}_2(\text{O}_2\text{CH})_4$ .

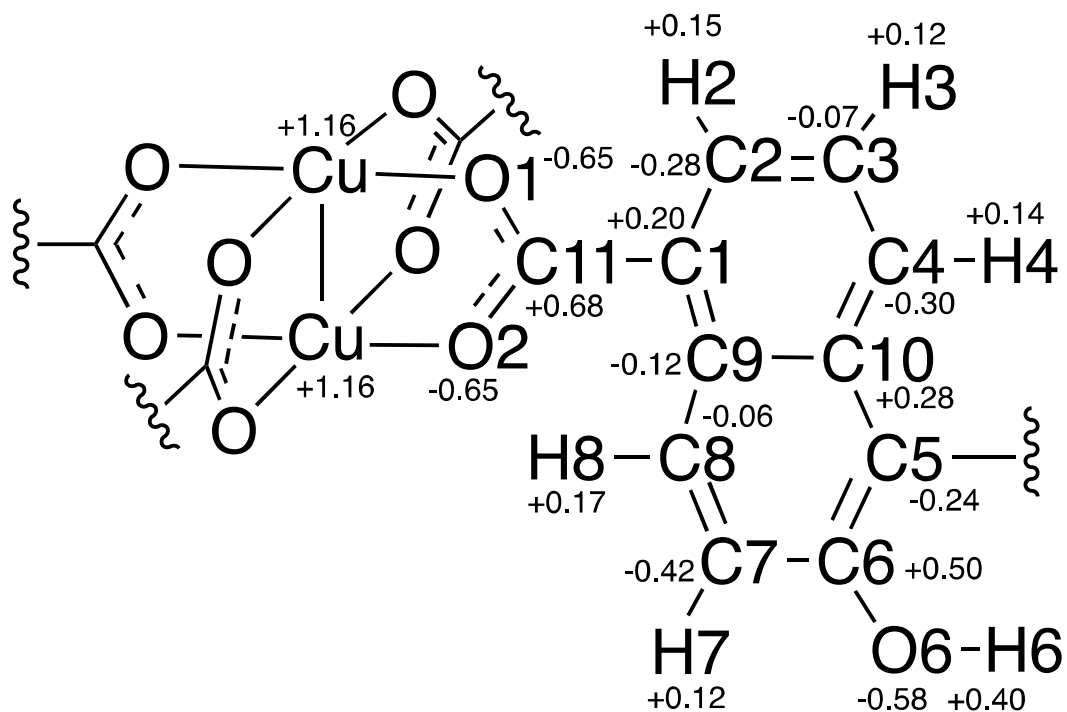

**Fig. S3** Assigned atomic charges for the Cu-paddlewheel unit and the linker.

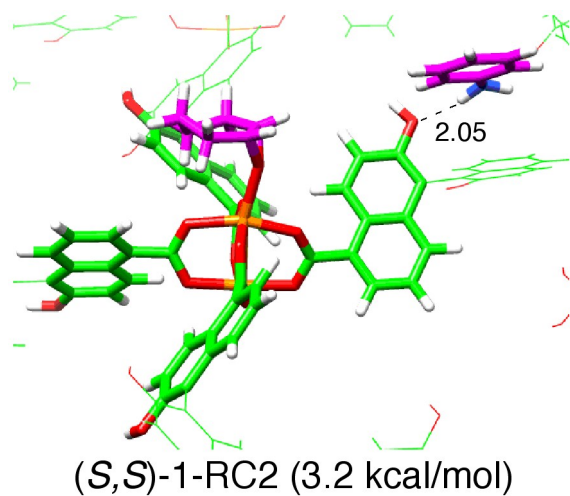

**Fig. S4** One possible structure of RC. Cyclohexene oxide has conformation **A**. Relative energies shown in kcal/mol are with respect to (*R,R*)-1-RC. Interatomic distances are indicated in Å. Carbon atoms in the substrates and the MOF are colored magenta and light green, respectively.

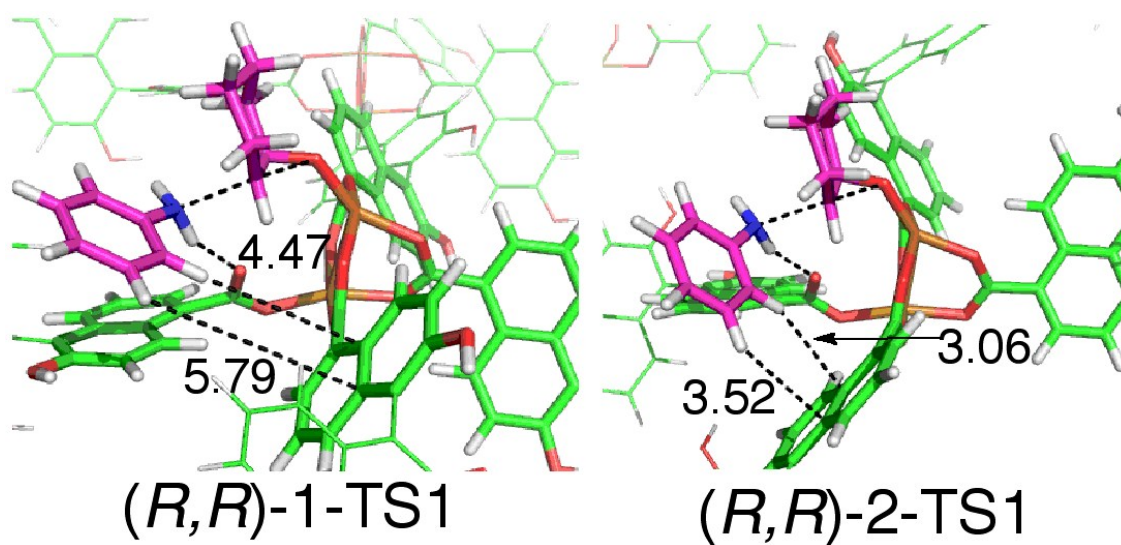

**Fig. S5** QM/MM-optimized structures of *(R,R)*-1-TS1 and *(R,R)*-2-TS1 obtained using the B3LYP functional for the QM part. Interatomic distances are indicated in Å. Carbon atoms in the substrates and the MOF are colored magenta and light green, respectively.

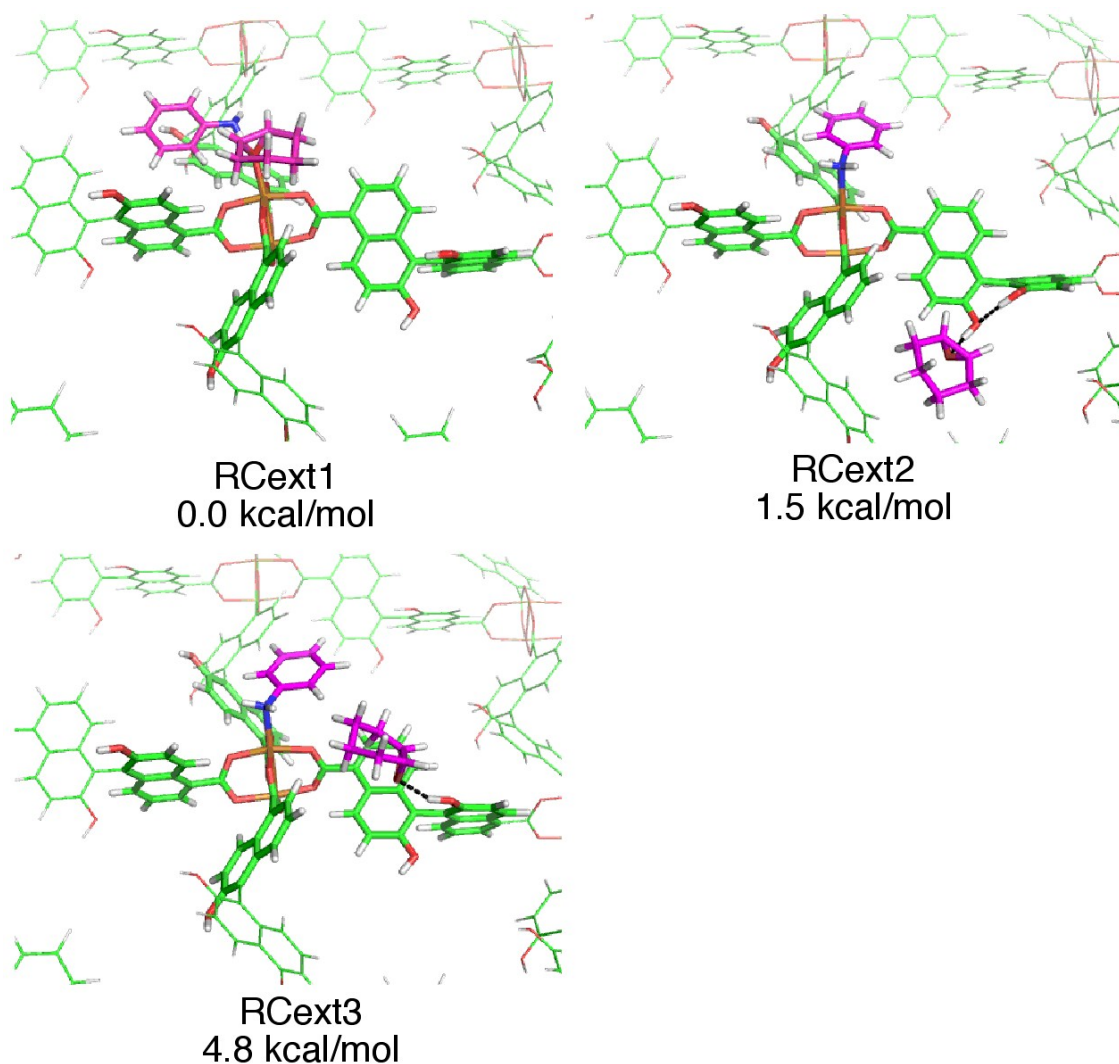

**Fig. S6** Several RC species obtained using an extended QM region; RCext1 in which the epoxide coordinates to the Cu(II) ion; RCext2 and RCext3 in which aniline coordinates to the Cu(II) ion and the epoxide forms a hydrogen bond with the BINOL moiety. Relative energies shown in kcal/mol are with respect to RCext1. Carbon atoms in the substrates and the MOF are colored magenta and light green, respectively. QM atoms are shown in stick.

\* Note that the epoxide forms a hydrogen bond with the BINOL moiety in both RCext2 and RCext3. One of the two OH groups of the BINOL moiety forms an intramolecular hydrogen bond with the other OH group in RCext2, but not in RCext3.



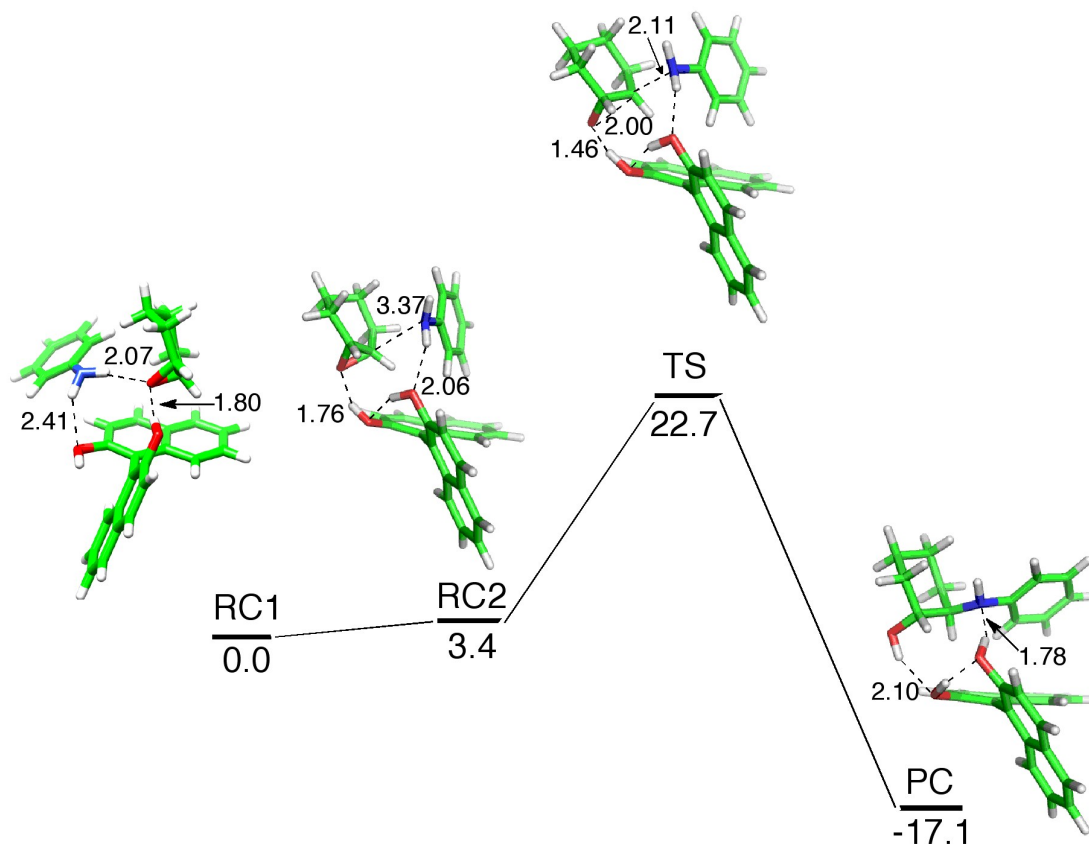

**Fig. S7** Energy profile (in kcal/mol) and optimized structures of key species for the H-bond assisted ring-opening reaction obtained at the B3LYP-D3/6-311+G\*\*// B3LYP-D3/6-31G\* level. Interatomic distances are indicated in Å.

\* We used DFT to calculate the activation energy for the H-bond assisted ring-opening reaction of epoxide catalyzed by *R*-BINOL alone. The barrier (22.7 kcal/mol) is somewhat higher than that obtained with QM/MM (18.4 kcal/mol), which suggests that the H-bond assisted ring-opening reaction might be enhanced in the MOF environment. However, the barrier obtained with QM/MM is still higher than the barriers obtained for the reactions in which Cu(II) acts as the Lewis acid site. These results suggest that cyclohexene oxide is activated preferentially by the copper center for the ring-opening reaction.

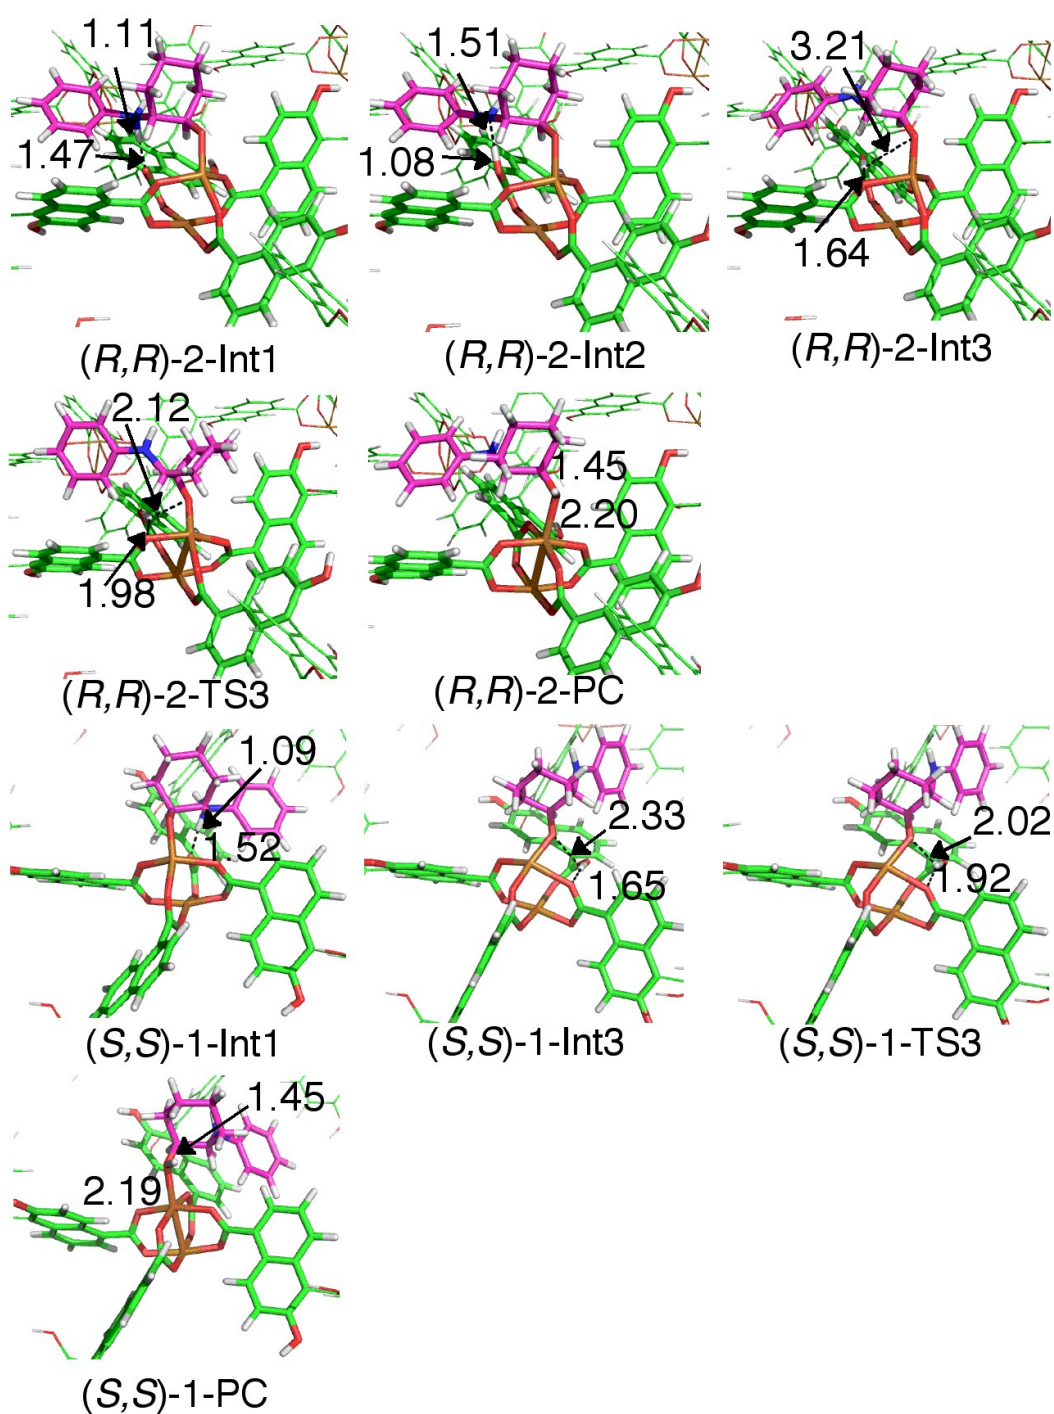

**Fig. S8** QM/MM-optimized structures of species in the proton transfer step. Interatomic distances are indicated in Å. Carbon atoms in the substrates and the MOF are colored magenta and light green, respectively.

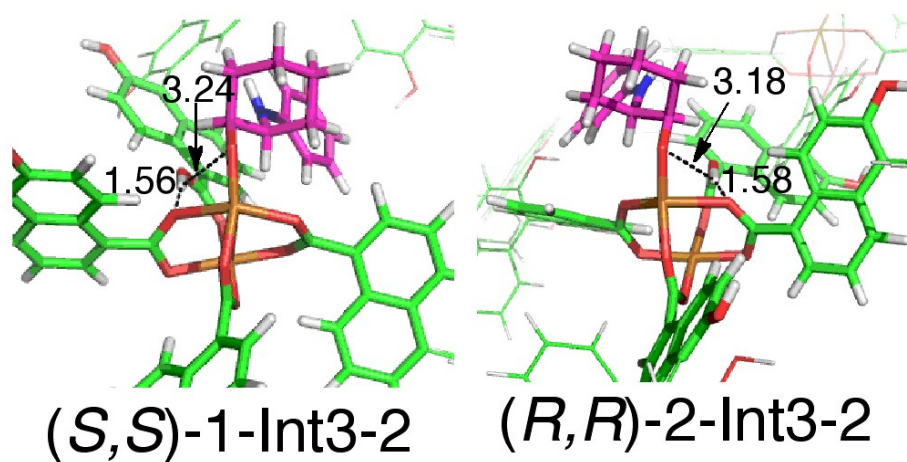

**Fig. S9** QM/MM-optimized structures of (*S,S*)-1-Int3-2 and (*R,R*)-2-Int3-2. Interatomic distances are indicated in Å. Carbon atoms in the substrates and the MOF are colored magenta and light green, respectively.

XYZ coordinates of lithium 6-hydroxy-1-naphthoate and  $\text{Cu}_2(\text{O}_2\text{CH})_4$

Lithium 6-hydroxy-1-naphthoate

|    |           |           |           |
|----|-----------|-----------|-----------|
| C  | 0.243757  | -2.497411 | 0.000000  |
| C  | 0.843809  | -1.114271 | 0.000000  |
| O  | -0.000578 | -3.074003 | 1.111285  |
| O  | -0.000578 | -3.074003 | -1.111285 |
| C  | 2.217532  | -0.971168 | 0.000000  |
| C  | 2.806105  | 0.317846  | 0.000000  |
| C  | 2.019002  | 1.448614  | 0.000000  |
| C  | 0.599267  | 1.343118  | 0.000000  |
| C  | -0.000578 | 0.038131  | 0.000000  |
| H  | 2.856872  | -1.853909 | 0.000000  |
| H  | 3.892908  | 0.408783  | 0.000000  |
| H  | 2.474239  | 2.439551  | 0.000000  |
| C  | -0.231836 | 2.495260  | 0.000000  |
| C  | -1.420164 | -0.049455 | 0.000000  |
| C  | -1.604627 | 2.367486  | 0.000000  |
| C  | -2.206244 | 1.081842  | 0.000000  |
| H  | 0.213613  | 3.489702  | 0.000000  |
| O  | -2.364490 | 3.511906  | 0.000000  |
| H  | -3.294969 | 0.994544  | 0.000000  |
| H  | -1.895660 | -1.029435 | 0.000000  |
| H  | -3.300504 | 3.278566  | 0.000000  |
| Li | -0.539155 | -4.466317 | 0.000000  |

| $\text{Cu}_2(\text{O}_2\text{CH})_4$ |           |           |           |
|--------------------------------------|-----------|-----------|-----------|
| Cu                                   | 0.000000  | 0.000000  | 1.259877  |
| Cu                                   | 0.000000  | 0.000000  | -1.259877 |
| O                                    | 1.962887  | 0.000000  | -1.135325 |
| O                                    | 1.962887  | 0.000000  | 1.135325  |
| O                                    | -1.962887 | 0.000000  | 1.135325  |
| O                                    | 0.000000  | -1.962887 | 1.135325  |
| O                                    | 0.000000  | 1.962887  | 1.135325  |
| O                                    | -1.962887 | 0.000000  | -1.135325 |
| O                                    | 0.000000  | 1.962887  | -1.135325 |
| O                                    | 0.000000  | -1.962887 | -1.135325 |
| C                                    | 0.000000  | 2.520278  | 0.000000  |
| C                                    | -2.520278 | 0.000000  | 0.000000  |
| C                                    | 0.000000  | -2.520278 | 0.000000  |
| C                                    | 2.520278  | 0.000000  | 0.000000  |
| H                                    | 3.623712  | 0.000000  | 0.000000  |
| H                                    | -3.623712 | 0.000000  | 0.000000  |
| H                                    | 0.000000  | -3.623712 | 0.000000  |
| H                                    | 0.000000  | 3.623712  | 0.000000  |

XYZ coordinates of optimized structures of key species for the H-bond assisted ring-opening reaction

|     |           |           |           |   |           |           |           |
|-----|-----------|-----------|-----------|---|-----------|-----------|-----------|
| RC1 |           |           |           | H | 1.386891  | -2.511302 | 5.727052  |
| C   | 6.370470  | 4.750159  | -0.058854 | H | -0.811890 | -3.102040 | 4.747060  |
| C   | 5.846636  | 3.334028  | -0.021401 | H | -1.490666 | -2.129078 | 2.552618  |
| C   | 4.999426  | 2.803268  | -1.105543 | H | 3.522970  | -1.289406 | 5.603215  |
| C   | 4.576746  | 3.667027  | -2.278290 | H | 5.031003  | 0.287976  | 4.408746  |
| C   | 5.328247  | 5.010504  | -2.352119 | H | 0.907613  | 2.458888  | -2.526238 |
| C   | 5.533876  | 5.657461  | -0.973481 | H | -0.064067 | 3.236978  | -0.381866 |
| O   | 4.414036  | 3.190256  | 0.171881  | H | 3.957258  | -1.050190 | 0.533874  |
| O   | 4.582393  | 1.438860  | 2.215796  | H | 2.497344  | 1.019022  | -3.749205 |
| C   | 3.678395  | 0.597146  | 2.763836  | H | 4.974152  | -1.763077 | -1.594097 |
| C   | 2.449725  | 0.289843  | 2.181801  | H | 4.254787  | -0.729092 | -3.748465 |
| C   | 1.565743  | -0.623791 | 2.854073  | H | 0.908697  | 1.913737  | 2.713057  |
| C   | 1.955639  | -1.195182 | 4.110327  | H | 4.230167  | 1.913324  | 1.426928  |
| C   | 3.224576  | -0.852782 | 4.653018  | H | 4.723354  | 3.098153  | -3.203542 |
| C   | 4.062542  | 0.014312  | 4.002388  | H | 3.496262  | 3.828563  | -2.184278 |
| C   | 1.075729  | -2.088402 | 4.774346  | H | 4.789327  | 5.695010  | -3.018022 |
| C   | -0.145928 | -2.417504 | 4.229276  | H | 6.315308  | 4.845193  | -2.807001 |
| C   | -0.530130 | -1.863023 | 2.985877  | H | 6.037507  | 6.624551  | -1.084564 |
| C   | 0.301060  | -0.991168 | 2.315283  | H | 4.569678  | 5.861303  | -0.495421 |
| C   | 2.069212  | 0.880164  | 0.863623  | H | 6.405965  | 5.150106  | 0.962237  |
| C   | 2.642509  | 0.416459  | -0.364221 | H | 7.408096  | 4.705530  | -0.420120 |
| C   | 2.225033  | 1.002018  | -1.605335 | H | 6.418115  | 2.623129  | 0.576408  |
| C   | 1.229199  | 2.016625  | -1.586722 | H | 4.978653  | 1.727072  | -1.259446 |
| C   | 0.682040  | 2.451506  | -0.407135 | H | 1.745975  | 4.499875  | 1.761811  |
| C   | 1.119448  | 1.892112  | 0.818403  | N | 2.159729  | 5.071850  | 1.032975  |
| C   | 2.823612  | 0.565300  | -2.815994 | H | 2.930512  | 4.574310  | 0.595973  |
| C   | 3.801145  | -0.406455 | -2.815470 | C | 1.222447  | 5.608751  | 0.152453  |
| C   | 4.208917  | -0.991399 | -1.592135 | C | 1.582071  | 5.992603  | -1.153934 |
| C   | 3.642380  | -0.593976 | -0.398927 | C | 0.638734  | 6.543664  | -2.019170 |
| O   | 0.561488  | 2.414832  | 1.951992  | C | -0.684548 | 6.731662  | -1.612710 |
| H   | -0.000919 | -0.579829 | 1.357805  | C | -1.047103 | 6.359156  | -0.314911 |

|     |           |          |           |   |           |          |           |
|-----|-----------|----------|-----------|---|-----------|----------|-----------|
| C   | -0.112230 | 5.806597 | 0.558076  | H | 33.434505 | 2.386920 | 53.674523 |
| H   | 2.606380  | 5.856487 | -1.486917 | H | 33.410811 | 1.787994 | 51.251419 |
| H   | 0.944347  | 6.827193 | -3.023822 | H | 31.718737 | 2.733410 | 49.749810 |
| H   | -1.416893 | 7.159944 | -2.290754 | H | 29.719365 | 5.317896 | 54.253593 |
| H   | -2.071775 | 6.494543 | 0.023101  | H | 27.914505 | 6.174834 | 52.759139 |
| H   | -0.409626 | 5.504293 | 1.559456  | H | 33.804259 | 6.627774 | 48.551795 |
|     |           |          |           | H | 31.913068 | 5.780729 | 49.857340 |
| RC2 |           |          |           | H | 26.869233 | 3.323268 | 48.209519 |
| C   | 32.157763 | 5.023275 | 46.056972 | H | 27.395700 | 5.030163 | 49.649111 |
| C   | 33.141739 | 5.757994 | 46.678650 | C | 23.595892 | 5.255955 | 46.957594 |
| C   | 31.040253 | 4.533489 | 46.784200 | C | 24.981009 | 5.045778 | 47.521614 |
| C   | 29.991134 | 3.833373 | 46.134254 | C | 26.168543 | 5.225767 | 46.680925 |
| C   | 28.876142 | 3.442992 | 46.829152 | C | 26.076186 | 5.612424 | 45.218604 |
| C   | 31.719790 | 3.661171 | 53.520161 | C | 24.666907 | 6.083984 | 44.822606 |
| C   | 32.677964 | 2.809680 | 53.019193 | C | 23.577222 | 5.182879 | 45.421767 |
| C   | 32.666278 | 2.475306 | 51.644389 | O | 25.697594 | 3.877859 | 47.023184 |
| C   | 31.717136 | 3.006640 | 50.798842 | C | 27.302140 | 8.190409 | 47.556574 |
| C   | 30.721559 | 3.904404 | 51.277364 | C | 26.856379 | 9.004994 | 46.499281 |
| C   | 30.721631 | 4.218789 | 52.677229 | C | 27.641174 | 9.177106 | 45.359649 |
| C   | 29.711884 | 5.073427 | 53.194187 | C | 28.880169 | 8.540602 | 45.241155 |
| C   | 28.720176 | 5.555024 | 52.378358 | C | 29.331840 | 7.737314 | 46.292946 |
| C   | 28.716773 | 5.243006 | 50.997817 | C | 28.561166 | 7.568599 | 47.441667 |
| C   | 29.727225 | 4.485784 | 50.414465 | N | 26.479498 | 7.936080 | 48.655536 |
| O   | 27.667615 | 5.745374 | 50.266131 | H | 26.812039 | 6.399547 | 45.024680 |
| C   | 33.039179 | 6.030479 | 48.063295 | H | 25.091906 | 5.197625 | 48.595520 |
| C   | 31.977338 | 5.553085 | 48.800078 | H | 27.099748 | 5.481648 | 47.173355 |
| C   | 30.945811 | 4.780508 | 48.194593 | H | 24.580408 | 6.121506 | 43.730311 |
| C   | 28.770556 | 3.713645 | 48.217635 | H | 24.523945 | 7.110877 | 45.187621 |
| C   | 29.805397 | 4.302705 | 48.933443 | H | 22.586926 | 5.477999 | 45.055528 |
| O   | 27.600083 | 3.416399 | 48.876284 | H | 23.743040 | 4.145013 | 45.106617 |
| H   | 33.987686 | 6.135824 | 46.111352 | H | 22.903780 | 4.526296 | 47.397210 |
| H   | 30.069453 | 3.632015 | 45.068962 | H | 23.264725 | 6.251091 | 47.287185 |
| H   | 28.051573 | 2.941801 | 46.331498 | H | 26.369901 | 4.738570 | 44.622261 |

|    |           |          |           |   |           |          |           |
|----|-----------|----------|-----------|---|-----------|----------|-----------|
| H  | 25.885117 | 9.490472 | 46.572701 | H | 33.633522 | 6.013135 | 45.770878 |
| H  | 27.275852 | 9.811175 | 44.555261 | H | 29.856280 | 3.262199 | 44.851404 |
| H  | 29.485269 | 8.673876 | 44.349068 | H | 27.876895 | 2.511162 | 46.148885 |
| H  | 30.294951 | 7.238725 | 46.228639 | H | 33.223688 | 3.020536 | 53.655958 |
| H  | 28.922047 | 6.941887 | 48.251687 | H | 33.291129 | 2.137156 | 51.322000 |
| H  | 25.861022 | 8.691902 | 48.920590 | H | 31.553320 | 2.759554 | 49.703370 |
| H  | 26.935576 | 7.494794 | 49.448085 | H | 29.266328 | 5.672158 | 53.855901 |
| H  | 32.211458 | 4.817606 | 44.990280 | H | 27.414384 | 6.175807 | 52.259100 |
| H  | 31.706435 | 3.916552 | 54.577424 | H | 33.415995 | 6.614088 | 48.186986 |
|    |           |          |           | H | 31.566288 | 5.743068 | 49.526638 |
| TS |           |          |           | H | 26.597473 | 2.966159 | 47.960648 |
| C  | 31.860590 | 4.808375 | 45.773272 | H | 27.074153 | 4.550702 | 49.351203 |
| C  | 32.806176 | 5.621733 | 46.356305 | C | 23.497925 | 4.727410 | 47.223420 |
| C  | 30.771661 | 4.292448 | 46.523757 | C | 24.957576 | 4.465359 | 47.598719 |
| C  | 29.764354 | 3.503280 | 45.907795 | C | 25.967117 | 5.206008 | 46.801861 |
| C  | 28.676427 | 3.072906 | 46.620361 | C | 25.700398 | 5.511202 | 45.355069 |
| C  | 31.414149 | 4.120621 | 53.337558 | C | 24.226943 | 5.843229 | 45.079303 |
| C  | 32.447331 | 3.298958 | 52.948572 | C | 23.298484 | 4.791063 | 45.703475 |
| C  | 32.487423 | 2.803716 | 51.623395 | O | 25.486781 | 3.285305 | 47.061018 |
| C  | 31.514115 | 3.152247 | 50.713141 | C | 27.252737 | 7.812487 | 47.028360 |
| C  | 30.441409 | 4.015578 | 51.073486 | C | 26.998277 | 8.797384 | 46.066434 |
| C  | 30.387973 | 4.489725 | 52.426868 | C | 28.062337 | 9.378568 | 45.374782 |
| C  | 29.299268 | 5.306904 | 52.832326 | C | 29.375285 | 8.975038 | 45.628519 |
| C  | 28.281742 | 5.596367 | 51.958475 | C | 29.622949 | 7.987396 | 46.586187 |
| C  | 28.335177 | 5.127947 | 50.625419 | C | 28.568796 | 7.407879 | 47.289448 |
| C  | 29.421260 | 4.407075 | 50.137549 | N | 26.183104 | 7.123568 | 47.663383 |
| O  | 27.249873 | 5.407788 | 49.823306 | H | 26.368821 | 6.316131 | 45.029597 |
| C  | 32.684116 | 5.956154 | 47.725565 | H | 25.081952 | 4.566085 | 48.690448 |
| C  | 31.643452 | 5.462128 | 48.483587 | H | 27.001337 | 5.070733 | 47.080728 |
| C  | 30.658708 | 4.598677 | 47.921278 | H | 24.064864 | 5.918083 | 43.997626 |
| C  | 28.545700 | 3.389557 | 48.002472 | H | 23.990550 | 6.833220 | 45.499323 |
| C  | 29.542918 | 4.092496 | 48.680712 | H | 22.251563 | 5.016068 | 45.467408 |
| O  | 27.404037 | 3.039692 | 48.654231 | H | 23.528651 | 3.806421 | 45.279593 |

|    |           |           |           |   |           |          |           |
|----|-----------|-----------|-----------|---|-----------|----------|-----------|
| H  | 22.888080 | 3.930337  | 47.664303 | C | 28.604041 | 3.340523 | 48.278986 |
| H  | 23.176298 | 5.674728  | 47.684628 | C | 29.554153 | 4.204269 | 48.821746 |
| H  | 25.994795 | 4.618496  | 44.791300 | O | 27.454198 | 2.977211 | 48.929193 |
| H  | 25.974657 | 9.102693  | 45.859490 | H | 33.634224 | 5.692994 | 45.665582 |
| H  | 27.860097 | 10.146534 | 44.633125 | H | 29.988543 | 2.646091 | 45.238771 |
| H  | 30.199123 | 9.424269  | 45.081580 | H | 28.007805 | 2.086687 | 46.635627 |
| H  | 30.635695 | 7.652339  | 46.788015 | H | 33.449015 | 3.645099 | 53.713374 |
| H  | 28.759316 | 6.636916  | 48.027861 | H | 33.514171 | 2.675969 | 51.413379 |
| H  | 25.302955 | 7.631636  | 47.664314 | H | 31.713258 | 3.126001 | 49.819842 |
| H  | 26.422033 | 6.791836  | 48.602338 | H | 29.321161 | 6.006486 | 53.934619 |
| H  | 31.926085 | 4.554949  | 44.717486 | H | 27.413006 | 6.356375 | 52.361337 |
| H  | 31.360947 | 4.495434  | 54.357355 | H | 33.311377 | 6.767067 | 47.896689 |
|    |           |           |           | H | 31.451818 | 6.101762 | 49.343180 |
| PC |           |           |           | H | 25.786552 | 2.964106 | 47.608787 |
| C  | 31.908376 | 4.439430  | 45.865490 | H | 27.192680 | 3.717390 | 49.522182 |
| C  | 32.803006 | 5.392633  | 46.297536 | C | 23.797333 | 5.464940 | 47.354577 |
| C  | 30.817142 | 4.037106  | 46.681452 | C | 25.154369 | 4.788965 | 47.583122 |
| C  | 29.861936 | 3.091197  | 46.222431 | C | 26.308078 | 5.481145 | 46.810402 |
| C  | 28.772414 | 2.770796  | 46.990381 | C | 25.933064 | 5.716594 | 45.336230 |
| C  | 31.564606 | 4.613776  | 53.400863 | C | 24.592815 | 6.444559 | 45.173174 |
| C  | 32.640554 | 3.847321  | 53.016297 | C | 23.471092 | 5.661051 | 45.869020 |
| C  | 32.679560 | 3.305319  | 51.710449 | O | 25.058390 | 3.432713 | 47.161188 |
| C  | 31.667669 | 3.560631  | 50.810910 | C | 27.785148 | 7.504224 | 47.057061 |
| C  | 30.553205 | 4.373810  | 51.162043 | C | 27.787888 | 8.878541 | 47.341235 |
| C  | 30.497260 | 4.882294  | 52.502594 | C | 28.853896 | 9.680634 | 46.938328 |
| C  | 29.358450 | 5.621738  | 52.918479 | C | 29.932299 | 9.128823 | 46.242208 |
| C  | 28.309482 | 5.824556  | 52.059790 | C | 29.927510 | 7.763417 | 45.953657 |
| C  | 28.368666 | 5.338123  | 50.731969 | C | 28.864634 | 6.953441 | 46.352388 |
| C  | 29.478160 | 4.659613  | 50.242511 | N | 26.732354 | 6.690853 | 47.557198 |
| O  | 27.208940 | 5.479473  | 49.996140 | H | 26.738639 | 6.258637 | 44.829937 |
| C  | 32.624312 | 5.993061  | 47.566068 | H | 25.375216 | 4.833081 | 48.656552 |
| C  | 31.580541 | 5.617775  | 48.382468 | H | 27.156376 | 4.796447 | 46.841782 |
| C  | 30.651202 | 4.617235  | 47.982103 | H | 24.369023 | 6.578976 | 44.107939 |



|   |           |           |           |   |           |          |           |
|---|-----------|-----------|-----------|---|-----------|----------|-----------|
| H | 24.662087 | 7.455634  | 45.603938 | H | 30.763324 | 9.754727 | 45.930276 |
| H | 22.508975 | 6.176762  | 45.759954 | H | 30.761002 | 7.307889 | 45.428096 |
| H | 23.367055 | 4.676923  | 45.394868 | H | 28.888036 | 5.895133 | 46.125023 |
| H | 23.032439 | 4.858482  | 47.851997 | H | 25.931805 | 7.263286 | 47.812635 |
| H | 23.800322 | 6.443817  | 47.859080 | H | 27.298255 | 5.956627 | 49.119182 |
| H | 25.862173 | 4.726831  | 44.868045 | H | 32.018799 | 3.981202 | 44.885265 |
| H | 26.953532 | 9.315680  | 47.886874 | H | 31.507104 | 5.019462 | 54.408353 |
| H | 28.837677 | 10.742676 | 47.169036 |   |           |          |           |

XYZ coordinates of the QM region of QM/MM-optimized structures (QM(B3LYP)/MM stands for the QM/MM-optimized structures obtained with the B3LYP functional and open-shell singlet stands for the QM/MM-optimized structure in the open-shell singlet state.)

|                     |            |           |            |   |            |           |            |
|---------------------|------------|-----------|------------|---|------------|-----------|------------|
| ( <i>R,R</i> )-1-RC |            |           |            | C | 31.9009352 | 4.8404895 | 35.5735360 |
| C                   | 26.8403266 | 7.2835157 | 42.0444136 | C | 31.8949961 | 5.1482945 | 36.9814444 |
| C                   | 25.9841073 | 6.4056462 | 41.4116358 | C | 31.1584596 | 6.2847574 | 37.4273570 |
| C                   | 26.4558496 | 5.2151553 | 40.7700254 | C | 30.4730465 | 7.0699735 | 36.5363194 |
| C                   | 27.8703512 | 4.9427789 | 40.8398246 | C | 30.4910742 | 6.7894896 | 35.1430230 |
| C                   | 27.5324024 | 2.9495470 | 39.4873574 | C | 31.2022954 | 5.6986533 | 34.6505323 |
| C                   | 26.1341013 | 3.1950616 | 39.4333957 | O | 29.7756658 | 7.6891681 | 34.4051797 |
| C                   | 25.5871966 | 4.3099166 | 40.0630002 | O | 32.9796704 | 5.7442620 | 39.6977016 |
| O                   | 25.4499417 | 2.2477121 | 38.7254039 | O | 32.3868693 | 3.6194351 | 40.1472755 |
| Cu                  | 33.0066963 | 6.3417500 | 41.5791104 | C | 32.6452793 | 4.5711905 | 39.3531884 |
| Cu                  | 32.4141618 | 3.8650797 | 42.1138601 | C | 28.7291114 | 5.8612019 | 41.5301639 |
| C                   | 36.6082742 | 3.9683968 | 41.8709074 | C | 28.2260934 | 7.0221822 | 42.0932986 |
| C                   | 37.1581110 | 3.2577243 | 42.9218702 | C | 28.3738853 | 3.7901365 | 40.1687057 |
| C                   | 38.5460610 | 2.9883492 | 42.9343037 | O | 30.9969913 | 6.5411340 | 41.4704182 |
| C                   | 39.3606853 | 3.4337905 | 41.9128636 | O | 30.5294051 | 4.4206354 | 42.0523717 |
| C                   | 38.8360156 | 4.1512737 | 40.7892270 | C | 30.1935252 | 5.5891568 | 41.6874980 |
| C                   | 37.4132499 | 4.3772383 | 40.7607387 | C | 32.3641106 | 5.9666395 | 45.7704955 |
| C                   | 36.8410389 | 4.9646378 | 39.6004945 | C | 33.2494784 | 6.8477225 | 46.3657160 |
| C                   | 37.6308345 | 5.3973106 | 38.5678458 | C | 31.2611204 | 5.4197949 | 46.5056982 |
| C                   | 39.0462057 | 5.3135483 | 38.6498100 | C | 30.2709646 | 4.5949028 | 45.8975908 |
| C                   | 39.6556639 | 4.6537467 | 39.7183459 | C | 29.2180114 | 4.1010512 | 46.6289699 |
| O                   | 39.7945670 | 5.8762151 | 37.6627731 | O | 32.9019806 | 6.5500229 | 43.5535356 |
| O                   | 34.8654014 | 5.5622263 | 41.7437594 | O | 32.4659089 | 4.3908437 | 44.0093196 |
| O                   | 34.3276595 | 3.4174991 | 42.1585849 | C | 32.5921821 | 5.6063348 | 44.3365468 |
| C                   | 35.1578871 | 4.3401079 | 41.9250989 | C | 33.1109695 | 7.1748477 | 47.7322327 |
| C                   | 32.5803167 | 4.2769897 | 37.8894017 | C | 32.0841089 | 6.6368867 | 48.4782302 |
| C                   | 33.2185796 | 3.1327263 | 37.4431788 | C | 31.1166461 | 5.7508538 | 47.9008082 |
| C                   | 33.2429379 | 2.8369415 | 36.0645091 | C | 29.0946688 | 4.3790669 | 48.0165541 |
| C                   | 32.6083564 | 3.6642317 | 35.1615105 | C | 30.0249544 | 5.1988337 | 48.6525246 |

|   |            |            |            |   |             |            |            |
|---|------------|------------|------------|---|-------------|------------|------------|
| O | 28.0597040 | 3.8487894  | 48.7247210 | C | 37.7272019  | 8.6102212  | 38.7523720 |
| H | 26.4414256 | 8.1889930  | 42.5127406 | C | 37.6695119  | 8.7611615  | 37.3634281 |
| H | 24.9155819 | 6.6443547  | 41.3978604 | C | 36.4909667  | 8.4792533  | 36.6586544 |
| H | 27.9149052 | 2.0719366  | 38.9596575 | C | 35.3608742  | 8.0591687  | 37.3754952 |
| H | 24.4992618 | 2.4314126  | 38.6698497 | C | 35.4064420  | 7.9120108  | 38.7617926 |
| H | 36.5176849 | 2.9270753  | 43.7441620 | N | 36.6464456  | 7.9753480  | 40.8500924 |
| H | 38.9799016 | 2.4303093  | 43.7701714 | H | 33.4249481  | 11.3730525 | 39.8511546 |
| H | 40.4334871 | 3.2231292  | 41.9668464 | H | 34.9736179  | 9.8864650  | 40.9582436 |
| H | 35.7612393 | 5.1028256  | 39.5277217 | H | 34.3850947  | 9.2036054  | 43.2989390 |
| H | 37.1717827 | 5.8634220  | 37.6908069 | H | 30.8726245  | 11.2682459 | 40.3736958 |
| H | 33.7113838 | 2.4763471  | 38.1649408 | H | 31.9146153  | 11.9276958 | 41.6478623 |
| H | 33.7659630 | 1.9435280  | 35.7092328 | H | 30.2251430  | 10.3071058 | 42.5744645 |
| H | 32.6448911 | 3.3922812  | 34.1017551 | H | 30.9121563  | 9.0111512  | 41.5732745 |
| H | 31.1272713 | 6.5293258  | 38.4901830 | H | 32.3252981  | 10.5561606 | 43.8371253 |
| H | 29.8899973 | 7.9315203  | 36.8724435 | H | 31.9096920  | 8.8223468  | 43.8138926 |
| H | 28.9071290 | 7.7191957  | 42.5886699 | H | 32.6278963  | 9.8299101  | 39.5123069 |
| H | 29.4424585 | 3.5742734  | 40.1883924 | H | 38.6659143  | 8.8019120  | 39.2835340 |
| H | 34.0632141 | 7.2705788  | 45.7706512 | H | 38.5621477  | 9.1034034  | 36.8265519 |
| H | 30.3389717 | 4.3541636  | 44.8363854 | H | 36.4508683  | 8.5918724  | 35.5709288 |
| H | 28.4626764 | 3.4749994  | 46.1392198 | H | 34.4271419  | 7.8248834  | 36.8524325 |
| H | 29.7275046 | 7.4502503  | 33.4666508 | H | 34.5291207  | 7.5412212  | 39.2951252 |
| H | 39.2222160 | 6.4517936  | 37.1250811 | H | 35.9796916  | 7.2932093  | 41.2189103 |
| H | 33.8265016 | 7.8568185  | 48.2025435 | H | 37.5778538  | 7.8365214  | 41.2338652 |
| H | 32.0074548 | 6.9082787  | 49.5358056 | H | 24.5176790  | 4.5092042  | 39.9960437 |
| H | 27.5173926 | 3.2887268  | 48.1459531 | H | 40.7378413  | 4.5235264  | 39.7193925 |
| C | 33.5653826 | 9.3651925  | 42.5850217 | H | 31.2464659  | 5.4982783  | 33.5800346 |
| C | 33.9103671 | 9.7831657  | 41.2058463 | H | 29.9288363  | 5.3729848  | 49.7242051 |
| C | 32.9131844 | 10.5187467 | 40.3290837 |   |             |            |            |
| C | 31.6656304 | 10.9999181 | 41.0940995 |   | (R,R)-1-TS1 |            |            |
| C | 31.1557616 | 9.9536229  | 42.0948471 | C | 26.4817298  | 7.4936254  | 42.4161287 |
| C | 32.2092225 | 9.6729152  | 43.1781829 | C | 25.7549016  | 6.4925917  | 41.8065631 |
| O | 33.5749022 | 8.4139759  | 41.5121954 | C | 26.3815484  | 5.3396092  | 41.2321525 |
| C | 36.5997349 | 8.1649429  | 39.4742113 | C | 27.8152757  | 5.2335539  | 41.3533629 |

|    |            |           |            |   |            |           |            |
|----|------------|-----------|------------|---|------------|-----------|------------|
| C  | 27.7368959 | 3.1220700 | 40.1470361 | C | 32.5541963 | 5.8891046 | 39.5469170 |
| C  | 26.3255619 | 3.2224668 | 40.0128920 | C | 28.5414160 | 6.2989337 | 41.9812559 |
| C  | 25.6437713 | 4.3151981 | 40.5382860 | C | 27.8867579 | 7.4129437 | 42.4811172 |
| O  | 25.7697133 | 2.1729176 | 39.3373501 | C | 28.4613497 | 4.0962299 | 40.7852540 |
| Cu | 32.4941388 | 7.8530863 | 41.7525606 | O | 30.6105236 | 7.3822467 | 41.7801654 |
| Cu | 32.5688988 | 4.9329758 | 42.2543577 | O | 30.6283921 | 5.2441776 | 42.4497162 |
| C  | 36.5584525 | 3.8499093 | 41.6475418 | C | 30.0342809 | 6.2960062 | 42.0750374 |
| C  | 37.0120226 | 3.3891573 | 42.8698567 | C | 32.3475867 | 6.9764505 | 45.9125328 |
| C  | 38.3620754 | 2.9902221 | 43.0176695 | C | 32.9963398 | 7.9831123 | 46.6027287 |
| C  | 39.2478536 | 3.0930125 | 41.9647935 | C | 31.3964514 | 6.1258270 | 46.5700477 |
| C  | 38.8258165 | 3.5485231 | 40.6733569 | C | 30.6342945 | 5.1466422 | 45.8691314 |
| C  | 37.4291228 | 3.8549934 | 40.5089512 | C | 29.7018848 | 4.3754343 | 46.5204970 |
| C  | 36.9517373 | 4.1486127 | 39.2029553 | O | 32.6449379 | 7.8359481 | 43.7327647 |
| C  | 37.8148330 | 4.2602210 | 38.1429623 | O | 32.8898555 | 5.6209696 | 44.0625413 |
| C  | 39.2159553 | 4.1435579 | 38.3341337 | C | 32.6476855 | 6.7973169 | 44.4552663 |
| C  | 39.7282871 | 3.7423406 | 39.5687541 | C | 32.7799239 | 8.1422352 | 47.9895672 |
| O  | 40.0482624 | 4.4247593 | 37.2928427 | C | 31.8975889 | 7.3211103 | 48.6589272 |
| O  | 35.1161363 | 5.6160695 | 40.9874629 | C | 31.1571511 | 6.2979010 | 47.9805122 |
| O  | 34.2511552 | 3.9612712 | 42.2098177 | C | 29.4800354 | 4.5161511 | 47.9161745 |
| C  | 35.2102205 | 4.5213850 | 41.5830912 | C | 30.1946361 | 5.4635332 | 48.6459158 |
| C  | 32.6787092 | 5.5597470 | 38.0878009 | O | 28.5606538 | 3.7271495 | 48.5396778 |
| C  | 33.2573735 | 4.3351547 | 37.7887562 | H | 25.9663876 | 8.3618243 | 42.8390032 |
| C  | 33.4313213 | 3.9375968 | 36.4490046 | H | 24.6665635 | 6.6025397 | 41.7627838 |
| C  | 32.9698864 | 4.7351948 | 35.4224765 | H | 28.2270369 | 2.2500892 | 39.7054456 |
| C  | 32.3250187 | 5.9898397 | 35.6692888 | H | 24.8074997 | 2.2553476 | 39.2467473 |
| C  | 32.2177175 | 6.4268472 | 37.0415807 | H | 36.3279395 | 3.3768495 | 43.7225965 |
| C  | 31.6042832 | 7.6879277 | 37.3007249 | H | 38.7144035 | 2.6282495 | 43.9889639 |
| C  | 31.1263698 | 8.4646883 | 36.2768943 | H | 40.2955125 | 2.8187009 | 42.1245643 |
| C  | 31.2015311 | 8.0301554 | 34.9266665 | H | 35.8865953 | 4.3171712 | 39.0396456 |
| C  | 31.7837608 | 6.8057855 | 34.6136963 | H | 37.4311814 | 4.5088638 | 37.1486760 |
| O  | 30.6568798 | 8.9173136 | 34.0428296 | H | 33.5734652 | 3.6866876 | 38.6082393 |
| O  | 32.7129868 | 7.0932499 | 39.9148272 | H | 33.9194707 | 2.9842573 | 36.2238178 |
| O  | 32.3258018 | 4.9067468 | 40.3052628 | H | 33.1039644 | 4.3823076 | 34.3949081 |

|   |            |            |            |    |              |            |            |
|---|------------|------------|------------|----|--------------|------------|------------|
| H | 31.5156094 | 8.0346524  | 38.3289272 | H  | 37.1445832   | 9.0946929  | 42.6812611 |
| H | 30.6538539 | 9.4311854  | 36.4725390 | H  | 35.7482345   | 9.6574689  | 43.6325054 |
| H | 28.4708679 | 8.2210686  | 42.9281451 | H  | 34.7111778   | 10.5712353 | 39.5346263 |
| H | 29.5457599 | 4.0034175  | 40.8503350 | H  | 39.2580050   | 7.8208305  | 38.4126239 |
| H | 33.6862971 | 8.6402558  | 46.0665719 | H  | 39.5315901   | 7.6498455  | 35.9539898 |
| H | 30.7715107 | 5.0093713  | 44.7973671 | H  | 37.5897177   | 6.9924922  | 34.5085407 |
| H | 29.1189560 | 3.6383194  | 45.9552761 | H  | 35.3588053   | 6.5522940  | 35.5808869 |
| H | 30.7073661 | 8.6121097  | 33.1234906 | H  | 35.0869645   | 6.7476440  | 38.0154942 |
| H | 39.5427065 | 4.8838939  | 36.5996137 | H  | 36.4309618   | 6.5936684  | 40.1890766 |
| H | 33.3166484 | 8.9237226  | 48.5367866 | H  | 37.8436148   | 7.5188641  | 40.2963905 |
| H | 31.7562367 | 7.4717888  | 49.7338169 | H  | 24.5717260   | 4.4342535  | 40.3814067 |
| H | 28.1609468 | 3.1202980  | 47.8954149 | H  | 40.8069163   | 3.6299862  | 39.6783078 |
| C | 35.2389588 | 8.6269313  | 41.8293390 | H  | 31.7858181   | 6.4422482  | 33.5861250 |
| C | 35.2580984 | 8.7153981  | 40.3606962 | H  | 30.0248747   | 5.5459070  | 49.7194437 |
| C | 35.6405420 | 9.9880538  | 39.6689775 |    |              |            |            |
| C | 36.6743672 | 10.8016476 | 40.4602124 |    | (R,R)-1-Int1 |            |            |
| C | 36.2671257 | 10.9450372 | 41.9347261 | C  | 26.2331868   | 7.3581398  | 42.4612969 |
| C | 36.1460415 | 9.5693690  | 42.6056754 | C  | 25.5643531   | 6.3347341  | 41.8232135 |
| O | 33.9317108 | 9.1383519  | 41.6161942 | C  | 26.2563292   | 5.2377679  | 41.2139667 |
| C | 37.1525079 | 7.3081924  | 38.3856640 | C  | 27.6946167   | 5.2173360  | 41.3285305 |
| C | 38.3955639 | 7.5696046  | 37.7861122 | C  | 27.7422249   | 3.1416566  | 40.0595041 |
| C | 38.5502908 | 7.4551752  | 36.4000503 | C  | 26.3270711   | 3.1588092  | 39.9299426 |
| C | 37.4662800 | 7.0887816  | 35.5918295 | C  | 25.5799374   | 4.1901329  | 40.4892401 |
| C | 36.2187572 | 6.8523996  | 36.1864720 | O  | 25.8352428   | 2.0971563  | 39.2228289 |
| C | 36.0575486 | 6.9694875  | 37.5667135 | Cu | 32.2504319   | 8.0577737  | 41.8007059 |
| N | 36.9760481 | 7.3783187  | 39.7800747 | Cu | 32.4335932   | 5.0701634  | 42.2563121 |
| H | 35.9975134 | 9.7443595  | 38.6531852 | C  | 36.4788177   | 4.0150361  | 41.6801626 |
| H | 34.6741780 | 7.9682517  | 39.8295235 | C  | 36.9033351   | 3.5777469  | 42.9211369 |
| H | 35.2493193 | 7.6034487  | 42.2355124 | C  | 38.2510994   | 3.1895519  | 43.1098599 |
| H | 36.8042799 | 11.7929922 | 39.9910740 | C  | 39.1618175   | 3.2755478  | 42.0770499 |
| H | 37.6558190 | 10.2913118 | 40.4007675 | C  | 38.7704763   | 3.7056950  | 40.7671020 |
| H | 37.0019373 | 11.5655091 | 42.4781788 | C  | 37.3783408   | 4.0110800  | 40.5636083 |
| H | 35.2925914 | 11.4624602 | 41.9979006 | C  | 36.9312234   | 4.2743109  | 39.2397370 |

|   |            |           |            |   |            |           |            |
|---|------------|-----------|------------|---|------------|-----------|------------|
| C | 37.8185075 | 4.3559260 | 38.1971648 | O | 32.7318768 | 5.6435992 | 44.0904491 |
| C | 39.2129053 | 4.2273731 | 38.4196957 | C | 32.4521283 | 6.8102016 | 44.5040088 |
| C | 39.6962111 | 3.8596760 | 39.6766927 | C | 32.6361525 | 8.0418215 | 48.0787283 |
| O | 40.0720385 | 4.4599739 | 37.3870704 | C | 31.7718180 | 7.1932357 | 48.7373276 |
| O | 34.9977399 | 5.6841065 | 40.8617744 | C | 31.0253863 | 6.1883377 | 48.0386097 |
| O | 34.1690221 | 4.1301087 | 42.2218743 | C | 29.3660641 | 4.3920588 | 47.9441721 |
| C | 35.1166486 | 4.6429287 | 41.5614322 | C | 30.0786944 | 5.3263302 | 48.6918255 |
| C | 32.6000303 | 5.6323693 | 38.1146651 | O | 28.4660820 | 3.5715259 | 48.5571658 |
| C | 33.2295669 | 4.4296249 | 37.8295492 | H | 25.6678140 | 8.1794174 | 42.9131932 |
| C | 33.4700869 | 4.0478503 | 36.4947040 | H | 24.4714211 | 6.3841576 | 41.7854421 |
| C | 33.0233517 | 4.8365222 | 35.4540954 | H | 28.2832802 | 2.3150326 | 39.5910295 |
| C | 32.3295813 | 6.0679261 | 35.6834725 | H | 24.8691513 | 2.1215761 | 39.1408123 |
| C | 32.1576015 | 6.4917804 | 37.0543124 | H | 36.1947795 | 3.5721109 | 43.7536868 |
| C | 31.5032620 | 7.7356883 | 37.2983960 | H | 38.5803691 | 2.8464200 | 44.0958066 |
| C | 31.0500786 | 8.5094856 | 36.2613134 | H | 40.2054344 | 3.0056072 | 42.2673925 |
| C | 31.1845993 | 8.0843450 | 34.9122716 | H | 35.8698286 | 4.4273211 | 39.0449218 |
| C | 31.8020020 | 6.8732935 | 34.6122669 | H | 37.4535207 | 4.5741913 | 37.1888545 |
| O | 30.6504529 | 8.9636785 | 34.0144419 | H | 33.5321736 | 3.7855094 | 38.6573659 |
| O | 32.5403978 | 7.1554815 | 39.9562556 | H | 33.9973039 | 3.1119051 | 36.2837297 |
| O | 32.2048633 | 4.9581106 | 40.3188584 | H | 33.2057161 | 4.4957627 | 34.4297030 |
| C | 32.4235775 | 5.9587925 | 39.5748279 | H | 31.3644249 | 8.0688803 | 38.3257447 |
| C | 28.3592906 | 6.3061654 | 41.9836768 | H | 30.5460879 | 9.4624316 | 36.4440216 |
| C | 27.6410962 | 7.3620002 | 42.5191066 | H | 28.1782207 | 8.1909085 | 42.9868703 |
| C | 28.4075279 | 4.1394163 | 40.7249952 | H | 29.4960006 | 4.1123213 | 40.7848073 |
| O | 30.3705710 | 7.5039764 | 41.7902639 | H | 33.5024375 | 8.6101377 | 46.1559873 |
| O | 30.4929426 | 5.3610223 | 42.4444573 | H | 30.5946121 | 5.0065457 | 44.8191978 |
| C | 29.8527838 | 6.3913019 | 42.0739070 | H | 28.9775468 | 3.5749111 | 45.9632320 |
| C | 32.1738184 | 6.9419359 | 45.9726918 | H | 30.7600233 | 8.6759797 | 33.0945277 |
| C | 32.8276361 | 7.9304650 | 46.6833486 | H | 39.5693049 | 4.7946309 | 36.6259805 |
| C | 31.2417199 | 6.0641219 | 46.6195912 | H | 33.1788952 | 8.8080352 | 48.6416589 |
| C | 30.4759939 | 5.1023387 | 45.8984227 | H | 31.6516174 | 7.3054146 | 49.8195373 |
| C | 29.5649393 | 4.2986475 | 46.5409016 | H | 28.0693732 | 2.9765835 | 47.9002429 |
| O | 32.4006639 | 7.8538356 | 43.8052797 | C | 34.9150888 | 8.7553755 | 41.6175572 |

|   |            |            |            |                     |            |           |            |
|---|------------|------------|------------|---------------------|------------|-----------|------------|
| C | 35.2620023 | 8.6630561  | 40.1062878 | H                   | 29.9078176 | 5.3898355 | 49.7664579 |
| C | 35.5648026 | 10.0315545 | 39.4999759 |                     |            |           |            |
| C | 36.6096154 | 10.8266141 | 40.2960267 | ( <i>R,R</i> )-2-RC |            |           |            |
| C | 36.1794415 | 10.9727853 | 41.7631419 | C                   | 26.6847521 | 7.0688011 | 42.3128167 |
| C | 35.9450229 | 9.5983571  | 42.3981089 | C                   | 25.8672926 | 6.2899802 | 41.5197053 |
| O | 33.6491021 | 9.2950626  | 41.7073501 | C                   | 26.3759370 | 5.1973682 | 40.7433415 |
| C | 36.8063036 | 7.4761676  | 38.4963319 | C                   | 27.7896365 | 4.9341495 | 40.8260662 |
| C | 38.1390664 | 7.6759422  | 38.1380494 | C                   | 27.5353415 | 3.1202339 | 39.2286024 |
| C | 38.5281203 | 7.4929236  | 36.8054378 | C                   | 26.1359574 | 3.3577374 | 39.1515706 |
| C | 37.5815214 | 7.1187046  | 35.8448995 | C                   | 25.5473450 | 4.3751145 | 39.8990604 |
| C | 36.2464990 | 6.9154715  | 36.2207446 | O                   | 25.4931707 | 2.4948816 | 38.3105245 |
| C | 35.8530439 | 7.0954021  | 37.5482004 | Cu                  | 32.8768731 | 6.2713307 | 41.5442875 |
| N | 36.3853818 | 7.6472766  | 39.8855351 | Cu                  | 32.3284553 | 3.7960750 | 42.1764530 |
| H | 35.8512942 | 9.9355379  | 38.4378637 | C                   | 36.5086659 | 4.0255013 | 41.8076006 |
| H | 34.3881799 | 8.2072183  | 39.6266321 | C                   | 37.0051961 | 3.1532212 | 42.7595631 |
| H | 34.9480801 | 7.7283150  | 42.0397173 | C                   | 38.3820169 | 2.8422389 | 42.7860557 |
| H | 36.7564594 | 11.8174510 | 39.8293738 | C                   | 39.2392778 | 3.3827329 | 41.8518936 |
| H | 37.5965788 | 10.3188899 | 40.2464218 | C                   | 38.7719397 | 4.2600498 | 40.8196068 |
| H | 36.9371532 | 11.5391797 | 42.3350293 | C                   | 37.3665208 | 4.5834105 | 40.8018315 |
| H | 35.2369329 | 11.5473457 | 41.8088398 | C                   | 36.8772108 | 5.4160929 | 39.7545323 |
| H | 36.9101009 | 9.0486066  | 42.4583347 | C                   | 37.7245482 | 5.9149751 | 38.7942492 |
| H | 35.5692283 | 9.6927563  | 43.4311783 | C                   | 39.1163538 | 5.6321084 | 38.8250169 |
| H | 34.6045122 | 10.5742071 | 39.5273559 | C                   | 39.6440111 | 4.8106649 | 39.8195311 |
| H | 38.8813653 | 7.9559038  | 38.8925278 | O                   | 39.9356883 | 6.1630603 | 37.8751592 |
| H | 39.5752203 | 7.6434833  | 36.5265078 | O                   | 34.7308555 | 5.5811336 | 41.7112926 |
| H | 37.8816247 | 6.9846926  | 34.8006544 | O                   | 34.2519335 | 3.4193799 | 42.1225423 |
| H | 35.4983078 | 6.5995861  | 35.4886706 | C                   | 35.0532436 | 4.3707695 | 41.8793706 |
| H | 34.8160568 | 6.9192614  | 37.8396216 | C                   | 32.3627346 | 3.9449901 | 37.9617557 |
| H | 35.9755377 | 6.7120725  | 40.2861120 | C                   | 32.9939692 | 2.7896266 | 37.5364981 |
| H | 37.1961268 | 7.8957259  | 40.4639073 | C                   | 33.0570176 | 2.4932952 | 36.1580690 |
| H | 24.5044975 | 4.2584713  | 40.3254558 | C                   | 32.4783521 | 3.3375373 | 35.2330488 |
| H | 40.7697139 | 3.7180876  | 39.8016365 | C                   | 31.7748618 | 4.5235742 | 35.6233005 |
| H | 31.8069637 | 6.4977533  | 33.5890312 | C                   | 31.7108577 | 4.8184169 | 37.0314995 |

|   |            |           |            |   |            |            |            |
|---|------------|-----------|------------|---|------------|------------|------------|
| C | 30.9568598 | 5.9506715 | 37.4561383 | H | 38.7701775 | 2.1682321  | 43.5561091 |
| C | 30.3327650 | 6.7628883 | 36.5450852 | H | 40.3011597 | 3.1222852  | 41.9024538 |
| C | 30.4274887 | 6.5075840 | 35.1500941 | H | 35.8152848 | 5.6591831  | 39.7084409 |
| C | 31.1361887 | 5.4050669 | 34.6802447 | H | 37.3257686 | 6.5520140  | 37.9959018 |
| O | 29.7735385 | 7.4347828 | 34.3891328 | H | 33.4606964 | 2.1309627  | 38.2735899 |
| O | 32.7864132 | 5.4631528 | 39.7117755 | H | 33.5758950 | 1.5905882  | 35.8204841 |
| O | 32.1819023 | 3.3641677 | 40.2497064 | H | 32.5569629 | 3.0741664  | 34.1732905 |
| C | 32.4392991 | 4.2829499 | 39.4170246 | H | 30.8680896 | 6.1714169  | 38.5205363 |
| C | 28.6066786 | 5.7624726 | 41.6598369 | H | 29.7411774 | 7.6252057  | 36.8642306 |
| C | 28.0717017 | 6.8152011 | 42.3808399 | H | 28.7141634 | 7.4305144  | 43.0164414 |
| C | 28.3375984 | 3.8767883 | 40.0426584 | H | 29.4061097 | 3.6578299  | 40.0894376 |
| O | 30.8585589 | 6.4551184 | 41.4743827 | H | 33.9419575 | 7.4018882  | 45.7081442 |
| O | 30.4339544 | 4.3546281 | 42.1573501 | H | 30.2691571 | 4.3985144  | 44.8390243 |
| C | 30.0742754 | 5.5028268 | 41.7716401 | H | 28.4035590 | 3.5245235  | 46.1602406 |
| C | 32.2717325 | 6.0614392 | 45.7387827 | H | 29.7947107 | 7.2262210  | 33.4421597 |
| C | 33.1371883 | 6.9754667 | 46.3124484 | H | 39.4183552 | 6.7162610  | 37.2678254 |
| C | 31.1759690 | 5.5136520 | 46.4852395 | H | 33.6851181 | 8.0455845  | 48.1226449 |
| C | 30.1984574 | 4.6615148 | 45.8949970 | H | 31.8898152 | 7.0847819  | 49.4806704 |
| C | 29.1520887 | 4.1687385 | 46.6370280 | H | 27.4706462 | 3.3525042  | 48.1714031 |
| O | 32.7914535 | 6.5880088 | 43.4997875 | C | 32.7661182 | 8.5853562  | 39.3318734 |
| O | 32.4372191 | 4.4304887 | 44.0350639 | C | 33.2081452 | 9.5562596  | 40.3572276 |
| C | 32.5167060 | 5.6617981 | 44.3179960 | C | 34.5318620 | 10.2894628 | 40.2243165 |
| C | 32.9870905 | 7.3346074 | 47.6699041 | C | 35.1716294 | 10.1363744 | 38.8310857 |
| C | 31.9733262 | 6.7904637 | 48.4296849 | C | 35.0641358 | 8.7006454  | 38.2980756 |
| C | 31.0260524 | 5.8700051 | 47.8740087 | C | 33.5959223 | 8.2928552  | 38.1048877 |
| C | 29.0289952 | 4.4667835 | 48.0207460 | O | 33.3290078 | 8.1327806  | 40.5733718 |
| C | 29.9496993 | 5.3085830 | 48.6419286 | C | 30.0382582 | 9.8797270  | 42.6315630 |
| O | 28.0051784 | 3.9297265 | 48.7404119 | C | 29.3360991 | 11.0548478 | 42.9709654 |
| H | 26.2591328 | 7.8930668 | 42.8936316 | C | 29.4236425 | 11.5887699 | 44.2596564 |
| H | 24.7993392 | 6.5287517 | 41.4903960 | C | 30.2034290 | 10.9670521 | 45.2421551 |
| H | 27.9479859 | 2.3139545 | 38.6165932 | C | 30.9022607 | 9.7994640  | 44.9098146 |
| H | 24.5471954 | 2.6890384 | 38.2231188 | C | 30.8290359 | 9.2605553  | 43.6238369 |
| H | 36.3220563 | 2.7242324 | 43.4969355 | N | 29.9972139 | 9.3532944  | 41.3400102 |



|             |            |            |            |   |            |           |            |
|-------------|------------|------------|------------|---|------------|-----------|------------|
| H           | 34.3768741 | 11.3575846 | 40.4594662 | C | 36.5972677 | 3.6608130 | 41.5530020 |
| H           | 32.4282768 | 10.0090331 | 40.9821021 | C | 37.0720968 | 2.6755618 | 42.3987052 |
| H           | 31.6886806 | 8.3919582  | 39.2520767 | C | 38.4293723 | 2.2875792 | 42.3380751 |
| H           | 36.2275633 | 10.4582798 | 38.8728282 | C | 39.2891719 | 2.8865367 | 41.4424266 |
| H           | 34.6623102 | 10.8165827 | 38.1197432 | C | 38.8377569 | 3.8813130 | 40.5143766 |
| H           | 35.6016855 | 8.6073661  | 37.3368586 | C | 37.4460224 | 4.2492732 | 40.5558596 |
| H           | 35.5472240 | 8.0061680  | 39.0089797 | C | 36.9599847 | 5.1666640 | 39.5799348 |
| H           | 33.1501880 | 8.8461938  | 37.2555444 | C | 37.8016308 | 5.7124345 | 38.6409003 |
| H           | 33.5035149 | 7.2176824  | 37.8749814 | C | 39.1904211 | 5.4132135 | 38.6409968 |
| H           | 35.2092461 | 9.8904167  | 41.0024104 | C | 39.7130902 | 4.5105192 | 39.5647614 |
| H           | 28.7199756 | 11.5518468 | 42.2128132 | O | 40.0124018 | 6.0117135 | 37.7346386 |
| H           | 28.8697119 | 12.5038326 | 44.4980836 | O | 35.0565220 | 5.4195713 | 41.7120376 |
| H           | 30.2642969 | 11.3849597 | 46.2518355 | O | 34.2886688 | 3.3398293 | 42.0293859 |
| H           | 31.5140494 | 9.2877112  | 45.6605624 | C | 35.2061591 | 4.1648393 | 41.7721711 |
| H           | 31.3916797 | 8.3556774  | 43.3823223 | C | 32.4463682 | 4.6163708 | 38.0423780 |
| H           | 30.2183641 | 8.3566386  | 41.2726567 | C | 32.8275791 | 3.3380114 | 37.6665217 |
| H           | 29.1803917 | 9.6086066  | 40.7910236 | C | 32.8355333 | 2.9730885 | 36.3047616 |
| H           | 24.4736721 | 4.5553775  | 39.8461604 | C | 32.4297541 | 3.8699545 | 35.3392466 |
| H           | 40.7181219 | 4.6259988  | 39.8353654 | C | 31.9808365 | 5.1883611 | 35.6725820 |
| H           | 31.2022880 | 5.2017000  | 33.6114420 | C | 32.0032766 | 5.5653312 | 37.0635551 |
| H           | 29.8665600 | 5.4802336  | 49.7150970 | C | 31.5364430 | 6.8632731 | 37.4182572 |
|             |            |            |            | C | 31.0795753 | 7.7374363 | 36.4657508 |
|             |            |            |            | C | 31.0651275 | 7.3800219 | 35.0908417 |
| (R,R)-2-TS1 |            |            |            | C | 31.5125845 | 6.1264787 | 34.6855730 |
| C           | 26.4613101 | 6.3389260  | 43.3334521 | O | 30.5918735 | 8.3731626 | 34.2790057 |
| C           | 25.7402047 | 5.7841093  | 42.2965831 | O | 33.0028331 | 6.0733604 | 39.8418090 |
| C           | 26.3564068 | 4.9679786  | 41.2917030 | O | 32.2117078 | 4.0138742 | 40.2977274 |
| C           | 27.7823582 | 4.7680935  | 41.3905565 | C | 32.5517529 | 4.9370945 | 39.5049809 |
| C           | 27.7203566 | 3.4171535  | 39.3719087 | C | 28.5071699 | 5.3892973 | 42.4574603 |
| C           | 26.3127300 | 3.5907095  | 39.2736275 | C | 27.8563990 | 6.1508796 | 43.4138057 |
| C           | 25.6222340 | 4.3605149  | 40.2079568 | C | 28.4361762 | 3.9867572 | 40.3919486 |
| O           | 25.7700573 | 2.9296966  | 38.2088113 | O | 30.6423092 | 6.3964472 | 42.6040055 |
| Cu          | 33.6184973 | 6.7124343  | 41.6309355 | O | 30.5480398 | 4.1667740 | 42.5058467 |
| Cu          | 32.4705927 | 4.0574028  | 42.2550177 |   |            |           |            |

|   |            |           |            |   |            |            |            |
|---|------------|-----------|------------|---|------------|------------|------------|
| C | 30.0086955 | 5.3246452 | 42.5248413 | H | 28.8574593 | 3.8704459  | 46.0127345 |
| C | 32.7841703 | 6.3394108 | 45.7963639 | H | 30.5488862 | 8.1060397  | 33.3475828 |
| C | 33.6345022 | 7.2319621 | 46.4243983 | H | 39.5043302 | 6.6374029  | 37.1934065 |
| C | 31.6583337 | 5.7856099 | 46.4984932 | H | 34.1393101 | 8.2437197  | 48.2804527 |
| C | 30.7002779 | 4.9425748 | 45.8661647 | H | 32.2708573 | 7.2964068  | 49.5470094 |
| C | 29.5880238 | 4.4976634 | 46.5372167 | H | 27.7675835 | 3.7800899  | 47.9541547 |
| O | 33.4571090 | 6.9194144 | 43.6052633 | C | 31.7509211 | 8.7559905  | 40.9101238 |
| O | 32.8937803 | 4.7770113 | 44.0352812 | C | 31.7436915 | 9.1998830  | 42.3122502 |
| C | 33.0640887 | 5.9829946 | 44.3637880 | C | 32.0612628 | 10.6135009 | 42.6841994 |
| C | 33.4450392 | 7.5571590 | 47.7857113 | C | 31.6542049 | 11.6206180 | 41.6002292 |
| C | 32.3920977 | 7.0190872 | 48.4950572 | C | 32.1327719 | 11.1697421 | 40.2124454 |
| C | 31.4450885 | 6.1366683 | 47.8806465 | C | 31.5219182 | 9.8123464  | 39.8374587 |
| C | 29.3811788 | 4.8208304 | 47.9035714 | O | 33.1179848 | 8.5368991  | 41.2095568 |
| C | 30.3016723 | 5.6185137 | 48.5808477 | C | 29.3644634 | 9.4454023  | 44.1770277 |
| O | 28.2839349 | 4.3429163 | 48.5540023 | C | 28.6535925 | 10.6153829 | 44.4960747 |
| H | 25.9514476 | 6.9427839 | 44.0912204 | C | 28.5592793 | 11.0421263 | 45.8243998 |
| H | 24.6651849 | 5.9844846 | 42.2599208 | C | 29.1805724 | 10.3207283 | 46.8503542 |
| H | 28.2121250 | 2.8164203 | 38.6021914 | C | 29.8974555 | 9.1606783  | 46.5313972 |
| H | 24.8122084 | 3.0584653 | 38.1342652 | C | 29.9852321 | 8.7180323  | 45.2106094 |
| H | 36.3950997 | 2.2302864 | 43.1324273 | N | 29.5491005 | 9.0409405  | 42.8446201 |
| H | 38.8037436 | 1.5188852 | 43.0215116 | H | 31.5818978 | 10.8351913 | 43.6544872 |
| H | 40.3398195 | 2.5796318 | 41.4376896 | H | 31.8283447 | 8.4250248  | 43.0697182 |
| H | 35.9050067 | 5.4418454 | 39.5657484 | H | 31.1942274 | 7.8267645  | 40.7104787 |
| H | 37.4026451 | 6.4058292 | 37.8906724 | H | 32.0547129 | 12.6188113 | 41.8507367 |
| H | 33.1354308 | 2.6267100 | 38.4364414 | H | 30.5500609 | 11.7152864 | 41.5931160 |
| H | 33.1634072 | 1.9701229 | 36.0135907 | H | 31.8695582 | 11.9238873 | 39.4495465 |
| H | 32.4478686 | 3.5466614 | 34.2934374 | H | 33.2346650 | 11.0806503 | 40.2145199 |
| H | 31.5465152 | 7.1601060 | 38.4649801 | H | 30.4284402 | 9.9157721  | 39.6885092 |
| H | 30.7136169 | 8.7318070 | 36.7361904 | H | 31.9436250 | 9.4377012  | 38.8888780 |
| H | 28.4245279 | 6.6042037 | 44.2304009 | H | 33.1507516 | 10.6568266 | 42.8677204 |
| H | 29.5153189 | 3.8313434 | 40.4431660 | H | 28.1708813 | 11.1892062 | 43.6972093 |
| H | 34.4596102 | 7.6684774 | 45.8561459 | H | 27.9949231 | 11.9513503 | 46.0566826 |
| H | 30.8481051 | 4.6343324 | 44.8354150 | H | 29.1098849 | 10.6568029 | 47.8889976 |

|              |            |           |            |   |            |           |            |
|--------------|------------|-----------|------------|---|------------|-----------|------------|
| H            | 30.4107556 | 8.5927975 | 47.3122901 | C | 35.1417076 | 4.1237869 | 41.5547209 |
| H            | 30.5432126 | 7.8092585 | 44.9736370 | C | 32.0271328 | 4.2776223 | 38.0991318 |
| H            | 29.6632100 | 8.0233209 | 42.7093242 | C | 32.1369788 | 2.9553152 | 37.6886684 |
| H            | 28.8983890 | 9.4507740 | 42.1766192 | C | 32.1182131 | 2.6215355 | 36.3216825 |
| H            | 24.5517319 | 4.5379256 | 40.1049165 | C | 31.9608549 | 3.6047274 | 35.3690780 |
| H            | 40.7924009 | 4.3635562 | 39.6042162 | C | 31.8052606 | 4.9830358 | 35.7221642 |
| H            | 31.5259215 | 5.8577742 | 33.6293124 | C | 31.8620039 | 5.3262942 | 37.1252356 |
| H            | 30.1725613 | 5.7711684 | 49.6523389 | C | 31.7355211 | 6.7026423 | 37.4797013 |
|              |            |           |            | C | 31.5292778 | 7.6641262 | 36.5237881 |
| (R,R)-2-Int1 |            |           |            | C | 31.4511161 | 7.3323015 | 35.1462467 |
| C            | 26.3371055 | 6.2854466 | 43.3624219 | C | 31.6076125 | 6.0126308 | 34.7328977 |
| C            | 25.6605264 | 5.7820186 | 42.2709325 | O | 31.2344084 | 8.4168112 | 34.3394197 |
| C            | 26.3004564 | 4.9539765 | 41.2909141 | O | 32.3874987 | 5.6620989 | 40.0343946 |
| C            | 27.7120784 | 4.6982384 | 41.4607480 | O | 31.9466737 | 3.4997089 | 40.3275735 |
| C            | 27.7036134 | 3.4064421 | 39.4022399 | C | 32.1253017 | 4.5141764 | 39.5808015 |
| C            | 26.3074940 | 3.6215431 | 39.2427263 | C | 28.3940858 | 5.2607492 | 42.5890732 |
| C            | 25.5961581 | 4.3829995 | 40.1680848 | C | 27.7116732 | 6.0265039 | 43.5242788 |
| O            | 25.7970617 | 2.9972319 | 38.1423831 | C | 28.3864353 | 3.9182061 | 40.4742275 |
| Cu           | 33.5044111 | 6.6393497 | 41.4648025 | O | 30.4917533 | 6.1599696 | 43.1887246 |
| Cu           | 32.3883946 | 3.8790822 | 42.2033242 | O | 30.4443048 | 4.0270631 | 42.5588892 |
| C            | 36.5446368 | 3.6147373 | 41.4018602 | C | 29.8785215 | 5.1360902 | 42.7857132 |
| C            | 36.9870545 | 2.6710907 | 42.3110555 | C | 32.7758813 | 6.1463784 | 45.7099279 |
| C            | 38.3450834 | 2.2808447 | 42.3248089 | C | 33.5582184 | 7.1309012 | 46.2890518 |
| C            | 39.2415129 | 2.8333907 | 41.4354412 | C | 31.7112063 | 5.5327374 | 46.4585272 |
| C            | 38.8278272 | 3.7809352 | 40.4429823 | C | 30.8304961 | 4.5682180 | 45.8904018 |
| C            | 37.4361943 | 4.1537306 | 40.4143201 | C | 29.7692629 | 4.0622878 | 46.5990064 |
| C            | 36.9935063 | 5.0273970 | 39.3801846 | O | 33.3896478 | 6.7326837 | 43.5018758 |
| C            | 37.8715770 | 5.5267743 | 38.4488086 | O | 32.9119873 | 4.5755893 | 43.9506357 |
| C            | 39.2567617 | 5.2199667 | 38.5123467 | C | 33.0445094 | 5.7919628 | 44.2689680 |
| C            | 39.7402145 | 4.3589308 | 39.4957678 | C | 33.3544636 | 7.5076968 | 47.6353079 |
| O            | 40.1140776 | 5.7706323 | 37.6077542 | C | 32.3508018 | 6.9264274 | 48.3819499 |
| O            | 34.9724622 | 5.3654638 | 41.3963468 | C | 31.4776113 | 5.9382083 | 47.8233662 |
| O            | 34.2423980 | 3.2962250 | 41.8687960 | C | 29.5416189 | 4.4446117 | 47.9461897 |



|    |            |           |            |   |            |           |            |
|----|------------|-----------|------------|---|------------|-----------|------------|
| C  | 27.6862181 | 4.6922282 | 41.3765918 | O | 31.9320410 | 3.3372498 | 40.3174725 |
| C  | 27.6772676 | 3.3522654 | 39.3505923 | C | 32.0272919 | 4.3915055 | 39.6041373 |
| C  | 26.2820970 | 3.5651085 | 39.1828022 | C | 28.3618335 | 5.2848989 | 42.4961087 |
| C  | 25.5714265 | 4.3469885 | 40.0914112 | C | 27.6786939 | 6.0764451 | 43.4111029 |
| O  | 25.7725373 | 2.9178046 | 38.0973659 | C | 28.3596950 | 3.8870324 | 40.4120557 |
| Cu | 33.4646075 | 6.6276294 | 41.3711609 | O | 30.4786928 | 6.1275019 | 43.1927455 |
| Cu | 32.3961392 | 3.8393353 | 42.1529019 | O | 30.4044080 | 4.0361902 | 42.5022603 |
| C  | 36.5488305 | 3.6497827 | 41.2967767 | C | 29.8215278 | 5.1124516 | 42.7214389 |
| C  | 36.9924636 | 2.7198153 | 42.2203360 | C | 32.7626178 | 6.1141134 | 45.6446987 |
| C  | 38.3527327 | 2.3405878 | 42.2511981 | C | 33.5413384 | 7.1137570 | 46.2021113 |
| C  | 39.2527596 | 2.8922408 | 41.3653168 | C | 31.7129844 | 5.4992198 | 46.4153262 |
| C  | 38.8415279 | 3.8286743 | 40.3613630 | C | 30.8339960 | 4.5171832 | 45.8754694 |
| C  | 37.4465383 | 4.1889837 | 40.3134930 | C | 29.7941103 | 4.0027342 | 46.6096687 |
| C  | 37.0108428 | 5.0505553 | 39.2663208 | O | 33.3805796 | 6.6624563 | 43.4228560 |
| C  | 37.8974455 | 5.5539413 | 38.3450399 | O | 32.8680961 | 4.5228286 | 43.9011839 |
| C  | 39.2843048 | 5.2606203 | 38.4284612 | C | 33.0258232 | 5.7430626 | 44.2074355 |
| C  | 39.7613125 | 4.4069440 | 39.4214321 | C | 33.3484521 | 7.5080418 | 47.5449071 |
| O  | 40.1487574 | 5.8140090 | 37.5328271 | C | 32.3634266 | 6.9233977 | 48.3129713 |
| O  | 34.9329886 | 5.3652618 | 41.2094699 | C | 31.4969839 | 5.9155716 | 47.7806222 |
| O  | 34.2631828 | 3.3104969 | 41.8152519 | C | 29.5849197 | 4.3968035 | 47.9561679 |
| C  | 35.1380128 | 4.1401327 | 41.4373846 | C | 30.4340664 | 5.3283677 | 48.5507865 |
| C  | 31.9659573 | 4.2034480 | 38.1164108 | O | 28.5587768 | 3.8529887 | 48.6688810 |
| C  | 31.9991882 | 2.8851471 | 37.6763516 | H | 25.7787440 | 6.9652928 | 43.9561010 |
| C  | 31.9795721 | 2.5809142 | 36.3039732 | H | 24.5768365 | 6.0524670 | 42.0439867 |
| C  | 31.8992004 | 3.5923736 | 35.3713776 | H | 28.1909516 | 2.7402335 | 38.6046386 |
| C  | 31.8339064 | 4.9706761 | 35.7505847 | H | 24.8356145 | 3.1139250 | 37.9441591 |
| C  | 31.8976135 | 5.2827363 | 37.1623247 | H | 36.2824369 | 2.3114422 | 42.9435857 |
| C  | 31.8893394 | 6.6594073 | 37.5394191 | H | 38.6961356 | 1.6169801 | 42.9973430 |
| C  | 31.7728520 | 7.6489011 | 36.5961665 | H | 40.3043268 | 2.5951972 | 41.4300334 |
| C  | 31.6681544 | 7.3484898 | 35.2130067 | H | 35.9566904 | 5.3132812 | 39.1879561 |
| C  | 31.7225526 | 6.0280064 | 34.7759709 | H | 37.5361416 | 6.2066652 | 37.5411053 |
| O  | 31.5370133 | 8.4604752 | 34.4266282 | H | 32.0528953 | 2.0879234 | 38.4189964 |
| O  | 32.1689640 | 5.5289501 | 40.1338756 | H | 32.0285116 | 1.5374607 | 35.9770937 |

|   |            |            |            |              |            |            |            |
|---|------------|------------|------------|--------------|------------|------------|------------|
| H | 31.8880079 | 3.3124051  | 34.3133434 | H            | 32.3084476 | 10.9051750 | 40.1689012 |
| H | 31.9945174 | 6.9269401  | 38.5886971 | H            | 29.6404559 | 9.3753432  | 40.2682908 |
| H | 31.7607551 | 8.7033491  | 36.8857732 | H            | 30.9769625 | 9.0491163  | 39.1540782 |
| H | 28.1973511 | 6.4900820  | 44.2789659 | H            | 32.7054271 | 10.4342242 | 42.6531191 |
| H | 29.4228808 | 3.6744410  | 40.5204460 | H            | 27.4361463 | 9.6085133  | 43.7424481 |
| H | 34.3086039 | 7.5903299  | 45.5871607 | H            | 26.6288433 | 10.1527071 | 46.0294156 |
| H | 30.9933459 | 4.1597702  | 44.8642909 | H            | 28.1389788 | 9.8359302  | 48.0053035 |
| H | 29.1263451 | 3.2602125  | 46.1561399 | H            | 30.4572349 | 8.9606558  | 47.6463086 |
| H | 31.4324763 | 8.2455765  | 33.4866241 | H            | 31.2458668 | 8.3893064  | 45.3835794 |
| H | 39.6664689 | 6.4065266  | 36.9338205 | H            | 30.0223679 | 7.0990897  | 43.1315781 |
| H | 33.9845637 | 8.2870783  | 47.9770480 | H            | 29.1301558 | 8.8653218  | 42.4019504 |
| H | 32.2356561 | 7.2545284  | 49.3486215 | H            | 24.4981103 | 4.5024216  | 39.9823270 |
| H | 28.0917488 | 3.1998849  | 48.1229177 | H            | 40.8370097 | 4.2512894  | 39.5033693 |
| C | 31.3794948 | 8.4393259  | 41.1814514 | H            | 31.6948759 | 5.7983687  | 33.7108104 |
| C | 31.2082515 | 8.9316436  | 42.6464003 | H            | 30.3067938 | 5.5300949  | 49.6143533 |
| C | 31.6121951 | 10.4015454 | 42.8087789 |              |            |            |            |
| C | 30.9372559 | 11.3318414 | 41.7935866 |              |            |            |            |
| C | 31.2206639 | 10.8598910 | 40.3603977 | (R,R)-2-Int3 |            |            |            |
| C | 30.7454175 | 9.4170673  | 40.1673215 | C            | 26.3407492 | 6.8752554  | 42.5796749 |
| O | 32.7263616 | 8.2642785  | 40.9192917 | C            | 25.6381349 | 6.0153345  | 41.7619377 |
| C | 29.3970794 | 8.9749385  | 44.4065314 | C            | 26.2692404 | 4.9374726  | 41.0577290 |
| C | 28.0980311 | 9.4682902  | 44.6043948 | C            | 27.6902980 | 4.7665528  | 41.2406138 |
| C | 27.6458169 | 9.7710656  | 45.8920911 | C            | 27.6383343 | 2.9070059  | 39.6743643 |
| C | 28.4878820 | 9.5980392  | 46.9961910 | C            | 26.2367764 | 3.0560981  | 39.4976915 |
| C | 29.7841926 | 9.1085864  | 46.7965935 | C            | 25.5447154 | 4.0527425  | 40.1796556 |
| C | 30.2390187 | 8.7894585  | 45.5143143 | O            | 25.7010482 | 2.1430641  | 38.6373321 |
| N | 29.8242060 | 8.5924860  | 43.0987231 | Cu           | 33.5659395 | 6.6584322  | 41.2005268 |
| H | 31.4229554 | 10.7342899 | 43.8446970 | Cu           | 32.4078962 | 3.9354250  | 42.1258925 |
| H | 31.8867052 | 8.3118453  | 43.2466882 | C            | 36.5382768 | 3.5777362  | 41.3802196 |
| H | 30.8367022 | 7.4755529  | 41.0684132 | C            | 36.9868802 | 2.6418249  | 42.2952149 |
| H | 31.2910803 | 12.3684385 | 41.9424664 | C            | 38.3504012 | 2.2725438  | 42.3224867 |
| H | 29.8416016 | 11.3506447 | 41.9683354 | C            | 39.2469790 | 2.8413510  | 41.4436944 |
| H | 30.7313155 | 11.5255899 | 39.6255469 | C            | 38.8297633 | 3.7823726  | 40.4462845 |
|   |            |            |            | C            | 37.4318275 | 4.1306884  | 40.3993638 |

|   |            |           |            |   |            |           |            |
|---|------------|-----------|------------|---|------------|-----------|------------|
| C | 36.9900400 | 4.9920258 | 39.3546337 | O | 32.9168364 | 6.5813556 | 43.3134591 |
| C | 37.8726917 | 5.5085260 | 38.4369306 | O | 32.7898595 | 4.4475724 | 43.9708987 |
| C | 39.2620121 | 5.2281602 | 38.5207983 | C | 32.7884293 | 5.6860963 | 44.2121404 |
| C | 39.7450403 | 4.3737173 | 39.5106300 | C | 33.1238728 | 7.5715229 | 47.4704572 |
| O | 40.1222144 | 5.7910438 | 37.6284020 | C | 32.1736955 | 6.9698349 | 48.2689977 |
| O | 34.9370008 | 5.3015344 | 41.3117851 | C | 31.3161275 | 5.9361560 | 47.7710468 |
| O | 34.2385924 | 3.2515715 | 41.8836684 | C | 29.4303117 | 4.3933819 | 47.9935789 |
| C | 35.1313177 | 4.0713187 | 41.5227558 | C | 30.2843461 | 5.3338638 | 48.5681742 |
| C | 31.9578451 | 4.3102918 | 38.0536428 | O | 28.4440103 | 3.8246961 | 48.7390453 |
| C | 32.1948675 | 3.0050562 | 37.6384433 | H | 25.8270399 | 7.6885905 | 43.1004194 |
| C | 32.2093948 | 2.6769406 | 36.2708566 | H | 24.5625040 | 6.1859909 | 41.6526232 |
| C | 31.9686721 | 3.6475335 | 35.3223714 | H | 28.1406187 | 2.1188808 | 39.1074643 |
| C | 31.6873495 | 5.0046253 | 35.6795302 | H | 24.7571301 | 2.2922503 | 38.4725546 |
| C | 31.6922041 | 5.3434338 | 37.0850102 | H | 36.2806175 | 2.2228304 | 43.0163736 |
| C | 31.4131459 | 6.6951033 | 37.4447645 | H | 38.6995639 | 1.5443155 | 43.0612895 |
| C | 31.1425032 | 7.6408489 | 36.4887344 | H | 40.3012365 | 2.5539392 | 41.5078287 |
| C | 31.1346056 | 7.3152347 | 35.1070074 | H | 35.9336615 | 5.2436526 | 39.2706254 |
| C | 31.4124346 | 6.0165391 | 34.6912052 | H | 37.5054515 | 6.1595963 | 37.6345348 |
| O | 30.8453405 | 8.3812909 | 34.3015569 | H | 32.3884609 | 2.2403605 | 38.3924731 |
| O | 32.2081941 | 5.7116430 | 40.0005323 | H | 32.4178670 | 1.6483042 | 35.9604965 |
| O | 31.9863513 | 3.5177944 | 40.2780540 | H | 31.9959017 | 3.3527745 | 34.2684703 |
| C | 32.0499267 | 4.5497805 | 39.5297383 | H | 31.4277796 | 6.9785687 | 38.4946482 |
| C | 28.3921216 | 5.6860363 | 42.0944315 | H | 30.9254797 | 8.6759359 | 36.7667529 |
| C | 27.7289657 | 6.7237487 | 42.7395201 | H | 28.2815789 | 7.4173870 | 43.3754464 |
| C | 28.3448095 | 3.7282063 | 40.5163808 | H | 29.4193821 | 3.5797638 | 40.6195675 |
| O | 30.4097762 | 6.7694928 | 42.5160675 | H | 34.0544984 | 7.6352118 | 45.4973347 |
| O | 30.4752956 | 4.5279113 | 42.3694164 | H | 30.6960840 | 4.2331546 | 44.8323729 |
| C | 29.8490287 | 5.6010105 | 42.3241458 | H | 28.8928018 | 3.3021801 | 46.1882305 |
| C | 32.5389511 | 6.1252116 | 45.6184438 | H | 30.8190278 | 8.1459416 | 33.3609179 |
| C | 33.3037634 | 7.1572475 | 46.1322346 | H | 39.6383998 | 6.3868014 | 37.0337878 |
| C | 31.5012695 | 5.5163383 | 46.4043328 | H | 33.7441261 | 8.3766193 | 47.8758868 |
| C | 30.5988256 | 4.5542273 | 45.8677690 | H | 32.0616939 | 7.3131182 | 49.3021740 |
| C | 29.5862401 | 4.0268528 | 46.6311505 | H | 27.9544818 | 3.1800007 | 48.2029200 |

|   |            |            |            |    |                |           |            |
|---|------------|------------|------------|----|----------------|-----------|------------|
| C | 32.0116173 | 9.0508109  | 40.8657792 | H  | 31.4304843     | 5.7699087 | 33.6296431 |
| C | 31.8630909 | 9.6122367  | 42.3056070 | H  | 30.1825986     | 5.5407644 | 49.6334939 |
| C | 32.9026409 | 10.7230928 | 42.5556234 |    |                |           |            |
| C | 32.8075712 | 11.8381160 | 41.5047048 |    | (R,R)-2-Int3-2 |           |            |
| C | 32.9661238 | 11.2738702 | 40.0832037 | C  | 26.4971768     | 6.4767202 | 42.9809171 |
| C | 31.9364876 | 10.1700742 | 39.8062250 | C  | 25.7283602     | 5.7159066 | 42.1263646 |
| O | 33.2230765 | 8.3861228  | 40.7404654 | C  | 26.3026823     | 4.7467739 | 41.2382063 |
| C | 29.7634983 | 9.7657907  | 43.6991761 | C  | 27.7307408     | 4.5770456 | 41.2910227 |
| C | 28.4028715 | 10.1574333 | 43.7624129 | C  | 27.5891509     | 2.8702314 | 39.5677905 |
| C | 27.6227232 | 9.8777499  | 44.8835993 | C  | 26.1818692     | 3.0471362 | 39.4831764 |
| C | 28.1611919 | 9.1994761  | 45.9859380 | C  | 25.5322148     | 3.9699431 | 40.3004279 |
| C | 29.5068608 | 8.8177134  | 45.9367809 | O  | 25.5974168     | 2.2339682 | 38.5559443 |
| C | 30.3019536 | 9.0951496  | 44.8230965 | Cu | 33.9400618     | 6.9736067 | 41.6425051 |
| N | 30.4973315 | 10.0338663 | 42.5658484 | Cu | 32.6560788     | 4.0948080 | 42.2314274 |
| H | 32.7659327 | 11.1268957 | 43.5753640 | C  | 36.7804823     | 3.7654949 | 41.5222932 |
| H | 32.0918478 | 8.7747950  | 42.9747158 | C  | 37.2885287     | 2.8526667 | 42.4284934 |
| H | 31.1727269 | 8.3451116  | 40.6838166 | C  | 38.6413022     | 2.4538496 | 42.3470085 |
| H | 33.5729426 | 12.6119082 | 41.6988297 | C  | 39.4660676     | 2.9765337 | 41.3743036 |
| H | 31.8237338 | 12.3411827 | 41.5948190 | C  | 38.9800343     | 3.8982403 | 40.3895784 |
| H | 32.8729399 | 12.0809981 | 39.3328642 | C  | 37.5895737     | 4.2645723 | 40.4464503 |
| H | 33.9781464 | 10.8426006 | 39.9742930 | C  | 37.0691246     | 5.0948329 | 39.4119369 |
| H | 30.9143323 | 10.5998629 | 39.7974431 | C  | 37.8778794     | 5.5715813 | 38.4088752 |
| H | 32.0991526 | 9.7122959  | 38.8143290 | C  | 39.2706566     | 5.2924456 | 38.3997503 |
| H | 33.9056456 | 10.2610717 | 42.5089715 | C  | 39.8240342     | 4.4649285 | 39.3740645 |
| H | 27.9596240 | 10.6789869 | 42.9062351 | O  | 40.0658339     | 5.8356963 | 37.4368235 |
| H | 26.5743867 | 10.1964298 | 44.8943253 | O  | 35.2256898     | 5.5274214 | 41.5526279 |
| H | 27.5468383 | 8.9885649  | 46.8664218 | O  | 34.5148655     | 3.4895222 | 42.1634008 |
| H | 29.9688469 | 8.2949624  | 46.7806294 | C  | 35.4015476     | 4.2951965 | 41.7562116 |
| H | 31.3456030 | 8.7786197  | 44.8333133 | C  | 32.7429788     | 4.5610823 | 38.1436994 |
| H | 31.3777136 | 6.7110672  | 42.7676371 | C  | 33.4515327     | 3.4329945 | 37.7522794 |
| H | 30.0119541 | 10.5183970 | 41.8212862 | C  | 33.6046339     | 3.1294622 | 36.3860443 |
| H | 24.4702186 | 4.1820355  | 40.0500162 | C  | 33.0032978     | 3.9183890 | 35.4273716 |
| H | 40.8218475 | 4.2222540  | 39.5855413 | C  | 32.2373446     | 5.0790705 | 35.7685889 |



|   |            |           |            |   |            |            |            |
|---|------------|-----------|------------|---|------------|------------|------------|
| C | 32.1385721 | 5.4243613 | 37.1675999 | H | 36.6414833 | 2.4746439  | 43.2241935 |
| C | 31.3951936 | 6.5865672 | 37.5240596 | H | 39.0410690 | 1.7412918  | 43.0753585 |
| C | 30.7842895 | 7.3539022 | 36.5658533 | H | 40.5153778 | 2.6657255  | 41.3529357 |
| C | 30.8581301 | 7.0109155 | 35.1895305 | H | 36.0116584 | 5.3568930  | 39.4047926 |
| C | 31.5700538 | 5.8863276 | 34.7798853 | H | 37.4508204 | 6.1982105  | 37.6168675 |
| O | 30.1815515 | 7.8806449 | 34.3828040 | H | 33.8859078 | 2.7858834  | 38.5175196 |
| O | 32.5964466 | 5.9334556 | 40.1283554 | H | 34.1861660 | 2.2523317  | 36.0856904 |
| O | 32.4942209 | 3.7163688 | 40.3183197 | H | 33.1217347 | 3.6323320  | 34.3773965 |
| C | 32.5989330 | 4.7673271 | 39.6154541 | H | 31.3138772 | 6.8695729  | 38.5719994 |
| C | 28.4964940 | 5.4278113 | 42.1513185 | H | 30.2125478 | 8.2456771  | 36.8362278 |
| C | 27.9040951 | 6.3627084 | 42.9761130 | H | 28.5103915 | 7.0163754  | 43.6046983 |
| C | 28.3430209 | 3.6154201 | 40.4364301 | H | 29.4238993 | 3.4612142  | 40.4673274 |
| O | 30.4696968 | 6.4811623 | 41.4655770 | H | 34.1964573 | 7.7770621  | 45.7897361 |
| O | 30.6578991 | 4.4196517 | 42.3346397 | H | 30.6846322 | 4.6211481  | 44.7885302 |
| C | 29.9752760 | 5.4036450 | 42.0111680 | H | 28.7988089 | 3.6932674  | 46.0236597 |
| C | 32.5972195 | 6.3549451 | 45.7548432 | H | 30.2376788 | 7.6461620  | 33.4433635 |
| C | 33.3969294 | 7.3049300 | 46.3659954 | H | 39.5444775 | 6.4341053  | 36.8775964 |
| C | 31.5032269 | 5.7515184 | 46.4664067 | H | 33.8437896 | 8.3750753  | 48.2036729 |
| C | 30.5708028 | 4.8762810 | 45.8398672 | H | 32.0615314 | 7.3100216  | 49.5006982 |
| C | 29.5130385 | 4.3472886 | 46.5376824 | H | 27.8059018 | 3.4632367  | 47.9989795 |
| O | 33.3058246 | 6.8863736 | 43.5564348 | C | 32.2970275 | 9.2655642  | 41.0390206 |
| O | 32.7997596 | 4.7489207 | 44.0415735 | C | 31.8326956 | 9.5126680  | 42.5042650 |
| C | 32.9251963 | 5.9741180 | 44.3413172 | C | 32.7599517 | 10.5323134 | 43.1926239 |
| C | 33.1932506 | 7.6378013 | 47.7231864 | C | 32.8318324 | 11.8496814 | 42.4089335 |
| C | 32.1874180 | 7.0352230 | 48.4487890 | C | 33.2995135 | 11.6100373 | 40.9642531 |
| C | 31.2957246 | 6.0846016 | 47.8544413 | C | 32.4042896 | 10.5887172 | 40.2506562 |
| C | 29.3353548 | 4.6225275 | 47.9192137 | O | 33.5440411 | 8.6616147  | 41.0686601 |
| C | 30.2119564 | 5.4807282 | 48.5822419 | C | 29.5951154 | 9.5520010  | 43.6150519 |
| O | 28.3034468 | 4.0464323 | 48.5951790 | C | 28.2287479 | 9.9255698  | 43.5778031 |
| H | 26.0277866 | 7.2048521 | 43.6475140 | C | 27.3632430 | 9.5894358  | 44.6171499 |
| H | 24.6464651 | 5.8781666 | 42.1344832 | C | 27.8155018 | 8.8632807  | 45.7285501 |
| H | 28.0497210 | 2.1330367 | 38.9052417 | C | 29.1644707 | 8.4954336  | 45.7771189 |
| H | 24.6404475 | 2.3721747 | 38.4837159 | C | 30.0478274 | 8.8351832  | 44.7504869 |



|   |            |           |            |   |            |            |            |
|---|------------|-----------|------------|---|------------|------------|------------|
| O | 30.5538192 | 4.5359143 | 42.2163655 | H | 30.6394455 | 4.2993163  | 44.8402801 |
| C | 29.8295355 | 5.5093686 | 42.4677817 | H | 28.6908400 | 3.5279118  | 46.0996695 |
| C | 32.6167783 | 5.9890475 | 45.7451050 | H | 30.9482186 | 8.1964608  | 33.5507751 |
| C | 33.4855588 | 6.8914840 | 46.3311457 | H | 39.4407431 | 6.6997131  | 37.1967414 |
| C | 31.4981567 | 5.4609309 | 46.4737801 | H | 34.0165157 | 7.9635091  | 48.1433337 |
| C | 30.5235487 | 4.6114224 | 45.8766899 | H | 32.1679823 | 7.0566389  | 49.4659329 |
| C | 29.4351915 | 4.1679338 | 46.5883057 | H | 27.6689631 | 3.4493994  | 48.0790904 |
| O | 33.0894460 | 6.5739194 | 43.5085344 | C | 31.8865686 | 8.8584768  | 41.3801041 |
| O | 32.7330001 | 4.4103756 | 43.9821569 | C | 33.0596831 | 9.5179262  | 42.1803806 |
| C | 32.8448168 | 5.6234596 | 44.3162038 | C | 34.2669240 | 9.8122555  | 41.2725712 |
| C | 33.3178310 | 7.2584887 | 47.6833869 | C | 33.9019288 | 10.6130677 | 40.0148218 |
| C | 32.2735666 | 6.7455232 | 48.4220303 | C | 32.7751045 | 9.9206736  | 39.2362177 |
| C | 31.3165386 | 5.8445072 | 47.8509733 | C | 31.5510505 | 9.6991820  | 40.1320338 |
| C | 29.2685946 | 4.5085301 | 47.9570567 | O | 32.1552373 | 7.5482632  | 40.9828968 |
| C | 30.1983140 | 5.3306233 | 48.5915377 | C | 31.8056571 | 10.6618309 | 44.0148566 |
| O | 28.2006665 | 4.0272596 | 48.6502992 | C | 31.1733664 | 11.8405730 | 44.4745660 |
| H | 25.7069821 | 7.2149104 | 43.6133315 | C | 30.3849478 | 11.8310319 | 45.6251016 |
| H | 24.4950147 | 5.8203628 | 42.0404301 | C | 30.1954166 | 10.6514231 | 46.3578505 |
| H | 28.1898776 | 2.1941035 | 39.0369350 | C | 30.8119543 | 9.4795046  | 45.9067666 |
| H | 24.7856756 | 2.2382477 | 38.5111633 | C | 31.6008278 | 9.4740829  | 44.7542406 |
| H | 36.5170352 | 2.1987723 | 43.1591962 | N | 32.6239801 | 10.7075531 | 42.8925368 |
| H | 38.9333003 | 1.5236114 | 42.9956719 | H | 35.0464975 | 10.3242484 | 41.8645541 |
| H | 40.4243373 | 2.6188442 | 41.3935139 | H | 33.3874245 | 8.7964025  | 42.9407946 |
| H | 35.9025877 | 5.4038355 | 39.6136362 | H | 31.0024385 | 8.8776498  | 42.0500861 |
| H | 37.3545428 | 6.4175383 | 37.9252355 | H | 34.7976933 | 10.7381125 | 39.3791946 |
| H | 32.8523124 | 2.0994351 | 38.2177369 | H | 33.5835870 | 11.6384692 | 40.2950796 |
| H | 32.6694515 | 1.5868082 | 35.7625840 | H | 32.4978012 | 10.5139839 | 38.3451529 |
| H | 32.1549273 | 3.3551108 | 34.1647541 | H | 33.1332052 | 8.9416504  | 38.8706711 |
| H | 31.9316865 | 6.8180241 | 38.5726702 | H | 31.1441169 | 10.6763781 | 40.4610970 |
| H | 31.2929817 | 8.5803474 | 36.9635376 | H | 30.7458992 | 9.1844871  | 39.5790922 |
| H | 28.1947887 | 7.0690562 | 43.7851600 | H | 34.6961183 | 8.8424664  | 40.9518577 |
| H | 29.4436847 | 3.5968215 | 40.6169599 | H | 31.3124657 | 12.7743374 | 43.9170308 |
| H | 34.3016570 | 7.3123112 | 45.7387594 | H | 29.9115466 | 12.7627437 | 45.9542008 |

|            |            |            |            |   |            |           |            |
|------------|------------|------------|------------|---|------------|-----------|------------|
| H          | 29.5803286 | 10.6479718 | 47.2628719 | O | 34.3595365 | 3.4020787 | 42.0830452 |
| H          | 30.6901696 | 8.5409646  | 46.4587900 | C | 35.1537742 | 4.3568233 | 41.8361288 |
| H          | 32.0548210 | 8.5373217  | 44.4340139 | C | 32.1978227 | 3.8439753 | 38.0441597 |
| H          | 31.2722040 | 6.7476870  | 42.7365717 | C | 32.4766369 | 2.5502887 | 37.6334444 |
| H          | 32.5360761 | 11.5493156 | 42.3336637 | C | 32.4290670 | 2.2178439 | 36.2643566 |
| H          | 24.4653310 | 4.0370365  | 40.1864455 | C | 32.0926019 | 3.1717866 | 35.3266297 |
| H          | 40.8151366 | 4.4310572  | 39.5702493 | C | 31.7457702 | 4.5111896 | 35.6964146 |
| H          | 31.6272335 | 5.8252734  | 33.6601585 | C | 31.7887462 | 4.8456235 | 37.0983349 |
| H          | 30.0923779 | 5.5159222  | 49.6604196 | C | 31.3844883 | 6.1558208 | 37.4918707 |
|            |            |            |            | C | 30.9919328 | 7.0824839 | 36.5609729 |
|            |            |            |            | C | 30.9903845 | 6.7765172 | 35.1742317 |
| (R,R)-2-PC |            |            |            | C | 31.3642579 | 5.5108450 | 34.7324153 |
| C          | 26.7911815 | 6.8741670  | 42.5383229 | O | 30.6021081 | 7.8277330 | 34.3899896 |
| C          | 25.9526815 | 6.1351415  | 41.7283684 | O | 32.8465515 | 5.3073477 | 39.7821584 |
| C          | 26.4315188 | 5.0435287  | 40.9315977 | O | 32.1429681 | 3.2471951 | 40.3367029 |
| C          | 27.8348021 | 4.7300119  | 41.0214330 | C | 32.4010643 | 4.1589566 | 39.4923706 |
| C          | 27.5410339 | 2.9663586  | 39.3780786 | C | 28.6727827 | 5.5193194 | 41.8699457 |
| C          | 26.1524503 | 3.2566717  | 39.2878451 | C | 28.1695123 | 6.5789870 | 42.6011705 |
| C          | 25.5859699 | 4.2722051  | 40.0555788 | C | 28.3580744 | 3.6733028 | 40.2214089 |
| O          | 25.4943986 | 2.4398090  | 38.4112264 | O | 30.9211041 | 6.1745210 | 41.6396193 |
| Cu         | 32.9321788 | 6.1273114  | 41.5851645 | O | 30.4963168 | 4.0888539 | 42.3589306 |
| Cu         | 32.4202829 | 3.6658140  | 42.2525211 | C | 30.1367874 | 5.2370767 | 41.9610330 |
| C          | 36.6078212 | 4.0130747  | 41.7410413 | C | 32.4227466 | 5.9831270 | 45.7911830 |
| C          | 37.1285293 | 3.1709976  | 42.7068559 | C | 33.2933827 | 6.8771134 | 46.3871976 |
| C          | 38.5079701 | 2.8705729  | 42.7143384 | C | 31.2919404 | 5.4663486 | 46.5053282 |
| C          | 39.3425497 | 3.3938400  | 41.7503744 | C | 30.3066198 | 4.6480646 | 45.8814212 |
| C          | 38.8481702 | 4.2389283  | 40.7036087 | C | 29.2159010 | 4.1992864 | 46.5849605 |
| C          | 37.4397236 | 4.5457860  | 40.7016938 | O | 32.9342683 | 6.5112967 | 43.5492452 |
| C          | 36.9182974 | 5.3330909  | 39.6349727 | O | 32.6156567 | 4.3506200 | 44.0953297 |
| C          | 37.7412710 | 5.8093446  | 38.6423318 | C | 32.6783283 | 5.5826086 | 44.3717299 |
| C          | 39.1386872 | 5.5512058  | 38.6608344 | C | 33.1153043 | 7.2392352 | 47.7406112 |
| C          | 39.6955786 | 4.7715099  | 39.6727496 | C | 32.0668758 | 6.7214316 | 48.4712640 |
| O          | 39.9353049 | 6.0633108  | 37.6813963 | C | 31.1099225 | 5.8285493 | 47.8877344 |
| O          | 34.8306593 | 5.5712202  | 41.6873028 |   |            |           |            |

|   |            |            |            |            |            |            |            |
|---|------------|------------|------------|------------|------------|------------|------------|
| C | 29.0568914 | 4.5031622  | 47.9636315 | O          | 32.9950757 | 8.1904272  | 40.8366363 |
| C | 29.9876388 | 5.3078935  | 48.6185037 | C          | 29.5532356 | 9.5581123  | 43.9529426 |
| O | 27.9879633 | 4.0073637  | 48.6463224 | C          | 28.2777520 | 10.1397033 | 44.1396116 |
| H | 26.3967142 | 7.7041354  | 43.1329807 | C          | 27.6184028 | 10.0446460 | 45.3646455 |
| H | 24.8928757 | 6.4080036  | 41.6965633 | C          | 28.2030518 | 9.3700331  | 46.4452126 |
| H | 27.9334322 | 2.1627320  | 38.7494116 | C          | 29.4609604 | 8.7861872  | 46.2663659 |
| H | 24.5609080 | 2.6779036  | 38.3037128 | C          | 30.1331455 | 8.8714266  | 45.0435990 |
| H | 36.4631212 | 2.7577108  | 43.4690682 | N          | 30.1676702 | 9.6375807  | 42.7112704 |
| H | 38.9164222 | 2.2186049  | 43.4929344 | H          | 32.3403054 | 10.5207135 | 44.0626540 |
| H | 40.4069364 | 3.1419055  | 41.7869608 | H          | 31.7171451 | 8.3047993  | 42.9985341 |
| H | 35.8502341 | 5.5522484  | 39.5947876 | H          | 30.9934088 | 8.2902536  | 40.6363696 |
| H | 37.3188594 | 6.4031142  | 37.8225233 | H          | 33.2931312 | 12.3054493 | 42.5444414 |
| H | 32.7584132 | 1.8053892  | 38.3813042 | H          | 31.5645076 | 12.0644988 | 42.2472038 |
| H | 32.6733165 | 1.2003423  | 35.9433571 | H          | 32.7891259 | 12.1918745 | 40.0687501 |
| H | 32.0846605 | 2.8781671  | 34.2720626 | H          | 33.8720440 | 10.8924416 | 40.5702467 |
| H | 31.3840891 | 6.4246277  | 38.5469007 | H          | 30.8313006 | 10.6742545 | 40.0856805 |
| H | 30.6707254 | 8.0840762  | 36.8602711 | H          | 32.0994330 | 9.9415674  | 39.0894615 |
| H | 28.8326800 | 7.1761599  | 43.2292774 | H          | 33.5794798 | 9.8505628  | 42.9986836 |
| H | 29.4193000 | 3.4202404  | 40.2754449 | H          | 27.8036437 | 10.6649007 | 43.3024324 |
| H | 34.1248961 | 7.2840595  | 45.8057123 | H          | 26.6326719 | 10.5093596 | 45.4765929 |
| H | 30.4037099 | 4.3755213  | 44.8303026 | H          | 27.6883346 | 9.3106271  | 47.4090649 |
| H | 28.4597623 | 3.5865115  | 46.0800073 | H          | 29.9481616 | 8.2525868  | 47.0886304 |
| H | 30.5498593 | 7.5953620  | 33.4497334 | H          | 31.1089245 | 8.3923127  | 44.9483203 |
| H | 39.4003336 | 6.5847431  | 37.0613266 | H          | 33.7667981 | 8.6982181  | 41.1397016 |
| H | 33.8174242 | 7.9331232  | 48.2133173 | H          | 29.7581774 | 10.3029175 | 42.0657830 |
| H | 31.9601525 | 7.0207674  | 49.5185779 | H          | 24.5192698 | 4.4872174  | 39.9924365 |
| H | 27.4512004 | 3.4517896  | 48.0579358 | H          | 40.7736755 | 4.6115927  | 39.6868898 |
| C | 31.7842087 | 8.9657301  | 40.9863749 | H          | 31.3964674 | 5.2893155  | 33.6656662 |
| C | 31.5492972 | 9.2577039  | 42.4825294 | H          | 29.8835475 | 5.4744170  | 49.6906517 |
| C | 32.5657507 | 10.2995550 | 43.0051291 |            |            |            |            |
| C | 32.5561049 | 11.5794795 | 42.1567022 | (S,S)-1-RC |            |            |            |
| C | 32.8345663 | 11.2704997 | 40.6764363 | C          | 26.8892028 | 7.4717016  | 41.8392651 |
| C | 31.8450861 | 10.2303062 | 40.1248224 | C          | 26.0228685 | 6.5741744  | 41.2486693 |

|    |            |           |            |   |            |           |            |
|----|------------|-----------|------------|---|------------|-----------|------------|
| C  | 26.4772071 | 5.3383869 | 40.6844234 | O | 32.9741239 | 5.5065291 | 39.6674439 |
| C  | 27.8840843 | 5.0430459 | 40.7865306 | O | 32.2561557 | 3.4447731 | 40.2162542 |
| C  | 27.5271495 | 2.9855621 | 39.5410873 | C | 32.5700046 | 4.3407361 | 39.3800405 |
| C  | 26.1335208 | 3.2508487 | 39.4615321 | C | 28.7504036 | 5.9819046 | 41.4356540 |
| C  | 25.6002101 | 4.4073666 | 40.0241094 | C | 28.2681252 | 7.1850385 | 41.9223243 |
| O  | 25.4389765 | 2.2762060 | 38.8026576 | C | 28.3756820 | 3.8464157 | 40.1871625 |
| Cu | 32.9935269 | 6.3132708 | 41.4978099 | O | 31.0248902 | 6.6053242 | 41.3230490 |
| Cu | 32.3679342 | 3.8678376 | 42.1534048 | O | 30.5167605 | 4.5492318 | 42.0817317 |
| C  | 36.5313029 | 3.8924339 | 41.8999168 | C | 30.2043133 | 5.6890856 | 41.6219974 |
| C  | 37.0668747 | 3.0907836 | 42.8889373 | C | 32.3590146 | 6.2000939 | 45.6846188 |
| C  | 38.4592774 | 2.8596987 | 42.9315368 | C | 33.2232122 | 7.1080048 | 46.2696767 |
| C  | 39.2895524 | 3.4062068 | 41.9769273 | C | 31.2899955 | 5.6083127 | 46.4379909 |
| C  | 38.7809670 | 4.2132242 | 40.9071792 | C | 30.3123682 | 4.7635397 | 45.8382793 |
| C  | 37.3612630 | 4.4575477 | 40.8745050 | C | 29.2908385 | 4.2266504 | 46.5839266 |
| C  | 36.8308231 | 5.2308109 | 39.8016236 | O | 32.8421352 | 6.7490148 | 43.4308126 |
| C  | 37.6548760 | 5.7581872 | 38.8352445 | O | 32.5260400 | 4.5863636 | 43.9765958 |
| C  | 39.0598998 | 5.5445680 | 38.8728708 | C | 32.5877234 | 5.8208938 | 44.2547262 |
| C  | 39.6257064 | 4.7718116 | 39.8863705 | C | 33.1053920 | 7.4072305 | 47.6456014 |
| O  | 39.8535691 | 6.0878691 | 37.9080329 | C | 32.1191490 | 6.8201114 | 48.4096598 |
| O  | 34.7643088 | 5.4317990 | 41.8215409 | C | 31.1655642 | 5.9131445 | 47.8416265 |
| O  | 34.2508951 | 3.2774433 | 42.1728687 | C | 29.1878333 | 4.4809655 | 47.9775726 |
| C  | 35.0736975 | 4.2144314 | 41.9656206 | C | 30.1063964 | 5.3183181 | 48.6090669 |
| C  | 32.4918048 | 3.9987896 | 37.9252158 | O | 28.1793189 | 3.9119645 | 48.6951168 |
| C  | 33.1600534 | 2.8701558 | 37.4870959 | H | 26.5045056 | 8.4116145 | 42.2478525 |
| C  | 33.2013052 | 2.5758062 | 36.1068768 | H | 24.9598758 | 6.8327756 | 41.2065677 |
| C  | 32.5646852 | 3.3933622 | 35.1954939 | H | 27.8994240 | 2.0740604 | 39.0663564 |
| C  | 31.8241993 | 4.5514864 | 35.6008869 | H | 24.4922687 | 2.4730162 | 38.7275099 |
| C  | 31.7854041 | 4.8447081 | 37.0106649 | H | 36.4067226 | 2.6699777 | 43.6515249 |
| C  | 30.9984698 | 5.9442541 | 37.4580540 | H | 38.8817444 | 2.2516341 | 43.7372713 |
| C  | 30.3036145 | 6.7189401 | 36.5662556 | H | 40.3643066 | 3.2129541 | 42.0453960 |
| C  | 30.3682532 | 6.4661336 | 35.1693876 | H | 35.7570866 | 5.4148337 | 39.7391652 |
| C  | 31.1233794 | 5.4049721 | 34.6747396 | H | 37.2250607 | 6.3475278 | 38.0157088 |
| O  | 29.6461988 | 7.3612562 | 34.4321706 | H | 33.6686489 | 2.2289892 | 38.2122379 |

|   |            |            |            |             |            |            |            |
|---|------------|------------|------------|-------------|------------|------------|------------|
| H | 33.7460749 | 1.6929998  | 35.7573622 | H           | 32.5692526 | 11.0506116 | 39.1480700 |
| H | 32.6232813 | 3.1284763  | 34.1350232 | H           | 31.1441613 | 10.5997630 | 40.1048801 |
| H | 30.9355488 | 6.1710486  | 38.5230393 | H           | 32.4991077 | 9.5511040  | 41.8394576 |
| H | 29.6800943 | 7.5509749  | 36.9036192 | H           | 33.2773572 | 11.1028345 | 41.4756578 |
| H | 28.9603771 | 7.8926020  | 42.3863503 | H           | 33.7375208 | 9.1887569  | 37.6416113 |
| H | 29.4395891 | 3.6111600  | 40.2332321 | H           | 39.3536365 | 7.9940126  | 43.1994712 |
| H | 34.0128072 | 7.5661980  | 45.6702432 | H           | 40.0402915 | 7.4713769  | 45.5238824 |
| H | 30.3606435 | 4.5438630  | 44.7712085 | H           | 38.4000243 | 6.4816339  | 47.1387865 |
| H | 28.5424237 | 3.5880064  | 46.0995799 | H           | 36.0587675 | 6.0184068  | 46.3642295 |
| H | 29.6218503 | 7.1396927  | 33.4886053 | H           | 35.3899318 | 6.5140578  | 44.0227728 |
| H | 39.3080465 | 6.5615184  | 37.2594765 | H           | 37.6753747 | 7.5284510  | 41.4462225 |
| H | 33.8122530 | 8.1041390  | 48.1067265 | H           | 36.0950158 | 7.0860985  | 41.8249855 |
| H | 32.0632022 | 7.0667031  | 49.4746192 | H           | 24.5307217 | 4.6076749  | 39.9597851 |
| H | 27.6403143 | 3.3507590  | 48.1144117 | H           | 40.7030995 | 4.6066878  | 39.8814126 |
| C | 34.3295412 | 9.3631188  | 40.7752518 | H           | 31.1853330 | 5.2205756  | 33.6022536 |
| C | 34.5066728 | 8.5808033  | 39.5271434 | H           | 30.0077764 | 5.4888274  | 49.6811056 |
| C | 33.4279804 | 8.5220266  | 38.4704150 |             |            |            |            |
| C | 32.0545594 | 8.9507962  | 39.0096501 | (S,S)-1-TS1 |            |            |            |
| C | 32.1502914 | 10.2597069 | 39.8023780 | C           | 26.5351180 | 7.0539030  | 42.4035600 |
| C | 33.0374851 | 10.1118917 | 41.0515373 | C           | 25.7709540 | 6.1132140  | 41.7453290 |
| O | 34.2141952 | 7.9282418  | 40.7692984 | C           | 26.3518720 | 4.9620490  | 41.1206130 |
| C | 37.3268281 | 7.2727062  | 43.4406111 | C           | 27.7800950 | 4.7956690  | 41.2353810 |
| C | 38.6358204 | 7.5411922  | 43.8910863 | C           | 27.6253080 | 2.7511440  | 39.9265180 |
| C | 39.0148987 | 7.2548835  | 45.2041992 | C           | 26.2184450 | 2.9084500  | 39.8021730 |
| C | 38.1005985 | 6.7031902  | 46.1096170 | C           | 25.5760990 | 3.9966640  | 40.3843770 |
| C | 36.7939951 | 6.4457625  | 45.6735617 | O           | 25.6252260 | 1.9105740  | 39.0822140 |
| C | 36.4076642 | 6.7225537  | 44.3608205 | Cu          | 32.5509130 | 7.2609340  | 41.6643020 |
| N | 36.9331921 | 7.5777835  | 42.1400363 | Cu          | 32.5229670 | 4.3408400  | 42.2460910 |
| H | 33.3790025 | 7.4947662  | 38.0699672 | C           | 36.5423870 | 3.6327070  | 41.7664510 |
| H | 35.5336626 | 8.3809623  | 39.1859027 | C           | 37.0417010 | 2.7632190  | 42.7161680 |
| H | 35.2319359 | 9.6809154  | 41.3146318 | C           | 38.4153170 | 2.4250830  | 42.7133700 |
| H | 31.6422833 | 8.1589088  | 39.6578646 | C           | 39.2708250 | 2.9651500  | 41.7774540 |
| H | 31.3554277 | 9.0590191  | 38.1631368 | C           | 38.7973540 | 3.8425810  | 40.7472830 |

|   |            |           |            |   |            |           |            |
|---|------------|-----------|------------|---|------------|-----------|------------|
| C | 37.3891800 | 4.1399730 | 40.7250590 | C | 29.4323190 | 4.4242160 | 46.5504700 |
| C | 36.8799770 | 4.9323670 | 39.6562470 | O | 32.7943300 | 7.2863610 | 43.6368300 |
| C | 37.7165110 | 5.4582970 | 38.7001680 | O | 32.7562970 | 5.0663260 | 44.0552520 |
| C | 39.1193340 | 5.2340710 | 38.7585720 | C | 32.6870960 | 6.2795660 | 44.3966600 |
| C | 39.6613930 | 4.4268910 | 39.7591420 | C | 33.1111650 | 7.6612470 | 47.8966740 |
| O | 39.9342480 | 5.8028070 | 37.8273590 | C | 32.1072960 | 7.0226360 | 48.5935570 |
| O | 34.9887240 | 5.4097120 | 41.8232210 | C | 31.1978860 | 6.1211190 | 47.9490560 |
| O | 34.2187320 | 3.3584950 | 42.2276140 | C | 29.2562770 | 4.6312030 | 47.9446400 |
| C | 35.1490970 | 4.1733870 | 41.9358000 | C | 30.1235050 | 5.4678200 | 48.6444530 |
| C | 32.7143320 | 4.9623860 | 38.0443440 | O | 28.2335180 | 4.0105440 | 48.5965540 |
| C | 33.4589700 | 3.8475080 | 37.6954910 | H | 26.0533000 | 7.9218290 | 42.8647260 |
| C | 33.5900720 | 3.4844350 | 36.3396130 | H | 24.6888040 | 6.2722990 | 41.7018730 |
| C | 32.9412250 | 4.2058900 | 35.3588630 | H | 28.0832830 | 1.8846560 | 39.4420280 |
| C | 32.1323070 | 5.3483180 | 35.6649770 | H | 24.6695930 | 2.0408880 | 38.9805450 |
| C | 32.0388880 | 5.7417520 | 37.0494310 | H | 36.3717060 | 2.3764450 | 43.4887120 |
| C | 31.2298550 | 6.8673690 | 37.3833020 | H | 38.8069320 | 1.7490120 | 43.4799460 |
| C | 30.5591830 | 7.5639950 | 36.4120440 | H | 40.3338900 | 2.7096380 | 41.8249090 |
| C | 30.6450170 | 7.1863970 | 35.0453630 | H | 35.8080430 | 5.1224210 | 39.5861930 |
| C | 31.4174690 | 6.0936840 | 34.6607430 | H | 37.2992510 | 6.0563490 | 37.8810420 |
| O | 29.9187420 | 7.9977540 | 34.2197000 | H | 33.9365570 | 3.2578170 | 38.4822380 |
| O | 32.7663540 | 6.4944400 | 39.8533300 | H | 34.1968130 | 2.6154070 | 36.0657750 |
| O | 32.4436660 | 4.2999500 | 40.2749820 | H | 33.0511690 | 3.8771200 | 34.3205650 |
| C | 32.6242420 | 5.2847720 | 39.5051800 | H | 31.1420590 | 7.1766100 | 38.4245640 |
| C | 28.5453860 | 5.7996420 | 41.9146250 | H | 29.9322020 | 8.4240900 | 36.6620420 |
| C | 27.9354260 | 6.9131040 | 42.4687260 | H | 28.5504240 | 7.6737850 | 42.9558500 |
| C | 28.3842660 | 3.6640520 | 40.6126120 | H | 29.4639060 | 3.5255600 | 40.6757130 |
| O | 30.6606410 | 6.8006200 | 41.7669360 | H | 34.0713220 | 7.9469890 | 45.9562930 |
| O | 30.5817030 | 4.6373980 | 42.3398060 | H | 30.5790950 | 4.8194780 | 44.8059260 |
| C | 30.0361590 | 5.7296730 | 42.0101930 | H | 28.7337640 | 3.7736460 | 46.0107120 |
| C | 32.4554900 | 6.5435510 | 45.8539710 | H | 29.9514270 | 7.7175440 | 33.2920710 |
| C | 33.2807600 | 7.4351030 | 46.5120930 | H | 39.4034860 | 6.2932920 | 37.1786970 |
| C | 31.3856500 | 5.8799020 | 46.5414440 | H | 33.7814390 | 8.3508260 | 48.4196880 |
| C | 30.4684510 | 5.0184090 | 45.8719030 | H | 32.0031500 | 7.2238810 | 49.6644090 |



|   |            |            |            |              |            |           |            |
|---|------------|------------|------------|--------------|------------|-----------|------------|
| H | 27.7379790 | 3.4552240  | 47.9726930 | H            | 40.7408887 | 4.2787234 | 39.7874598 |
| C | 35.4501540 | 8.3604300  | 42.1719310 | H            | 31.4672203 | 5.7932192 | 33.6141714 |
| C | 35.0595710 | 8.3002370  | 40.7554650 | H            | 29.9914841 | 5.5875478 | 49.7197679 |
| C | 35.6600530 | 9.3364530  | 39.8171470 |              |            |           |            |
| C | 35.8393940 | 10.7024140 | 40.4935750 | (S,S)-1-Int1 |            |           |            |
| C | 36.6276570 | 10.5635950 | 41.8046540 | C            | 26.4178722 | 7.0579246 | 42.5101417 |
| C | 35.9097300 | 9.6395590  | 42.7988980 | C            | 25.6914319 | 6.1360490 | 41.7857489 |
| O | 33.8170370 | 8.6863760  | 41.3129520 | C            | 26.3178123 | 5.0533342 | 41.0867167 |
| C | 37.8968300 | 7.0669700  | 43.4363330 | C            | 27.7520905 | 4.9376420 | 41.1970147 |
| C | 38.9927950 | 7.8742510  | 43.7863640 | C            | 27.6843493 | 2.9812126 | 39.7540359 |
| C | 39.5094640 | 7.8370310  | 45.0838100 | C            | 26.2737159 | 3.0965785 | 39.6229940 |
| C | 38.9307110 | 7.0111630  | 46.0542810 | C            | 25.5826986 | 4.1115058 | 40.2785853 |
| C | 37.8236330 | 6.2244590  | 45.7115930 | O            | 25.7276033 | 2.1335909 | 38.8218024 |
| C | 37.3048810 | 6.2470320  | 44.4153910 | Cu           | 32.4096055 | 7.5423492 | 41.5471815 |
| N | 37.3309830 | 7.1439220  | 42.1557530 | Cu           | 32.5103944 | 4.4760183 | 42.2545684 |
| H | 35.0076530 | 9.4096800  | 38.9288030 | C            | 36.5008556 | 3.5718086 | 41.8742375 |
| H | 35.0386690 | 7.2961810  | 40.3084660 | C            | 37.0031441 | 2.6968766 | 42.8171279 |
| H | 35.1008140 | 7.5526080  | 42.8113910 | C            | 38.3831827 | 2.3865503 | 42.8297901 |
| H | 34.8429880 | 11.1304150 | 40.7075230 | C            | 39.2408592 | 2.9532936 | 41.9114431 |
| H | 36.3536730 | 11.3993170 | 39.8078620 | C            | 38.7658571 | 3.8329117 | 40.8833044 |
| H | 37.6307790 | 10.1462340 | 41.5841260 | C            | 37.3535772 | 4.1157994 | 40.8534143 |
| H | 36.7937660 | 11.5513500 | 42.2698040 | C            | 36.8478898 | 4.9159108 | 39.7874100 |
| H | 35.0114230 | 10.1333930 | 43.2118590 | C            | 37.6881453 | 5.4606845 | 38.8446670 |
| H | 36.5518780 | 9.3958620  | 43.6640130 | C            | 39.0907632 | 5.2383431 | 38.9031355 |
| H | 36.6401520 | 8.9511050  | 39.4704560 | C            | 39.6304718 | 4.4240873 | 39.8996299 |
| H | 39.4334410 | 8.5345850  | 43.0310780 | O            | 39.9063579 | 5.8123875 | 37.9782714 |
| H | 40.3701590 | 8.4642800  | 45.3389080 | O            | 34.9064621 | 5.3148984 | 41.8738498 |
| H | 39.3366800 | 6.9845090  | 47.0700430 | O            | 34.1606909 | 3.2889682 | 42.3374184 |
| H | 37.3562830 | 5.5781050  | 46.4614280 | C            | 35.0931867 | 4.0704086 | 42.0268930 |
| H | 36.4436310 | 5.6283850  | 44.1478240 | C            | 32.6843146 | 4.8562343 | 38.0765613 |
| H | 37.9675250 | 7.4098730  | 41.4065890 | C            | 33.4620082 | 3.7620948 | 37.7346781 |
| H | 36.7374470 | 6.3471000  | 41.8937370 | C            | 33.6033215 | 3.3911190 | 36.3811642 |
| H | 24.5051370 | 4.1512104  | 40.2531432 | C            | 32.9318935 | 4.0823226 | 35.3938218 |

|   |            |           |            |   |            |            |            |
|---|------------|-----------|------------|---|------------|------------|------------|
| C | 32.0869802 | 5.2004087 | 35.6916901 | H | 24.7739003 | 2.2523823  | 38.6933002 |
| C | 31.9832297 | 5.6021453 | 37.0735680 | H | 36.3287081 | 2.2849481  | 43.5725655 |
| C | 31.1393160 | 6.7041672 | 37.3993926 | H | 38.7769687 | 1.7066964  | 43.5918793 |
| C | 30.4382993 | 7.3648772 | 36.4249360 | H | 40.3073123 | 2.7139733  | 41.9689865 |
| C | 30.5314078 | 6.9768277 | 35.0619389 | H | 35.7755571 | 5.0964867  | 39.7023437 |
| C | 31.3464453 | 5.9132626 | 34.6820637 | H | 37.2696786 | 6.0621269  | 38.0291236 |
| O | 29.7674797 | 7.7513118 | 34.2336770 | H | 33.9571683 | 3.1921681  | 38.5251679 |
| O | 32.6941357 | 6.4134777 | 39.8701643 | H | 34.2374852 | 2.5393077  | 36.1144586 |
| O | 32.4515634 | 4.2185618 | 40.3215870 | H | 33.0503834 | 3.7482404  | 34.3579558 |
| C | 32.5920518 | 5.2057734 | 39.5350984 | H | 31.0493536 | 7.0236127  | 38.4371233 |
| C | 28.4783675 | 5.9286233 | 41.9347154 | H | 29.7819269 | 8.2041580  | 36.6695547 |
| C | 27.8234897 | 6.9738522 | 42.5637673 | H | 28.4075622 | 7.7300784  | 43.0941624 |
| C | 28.4034380 | 3.8718173 | 40.5089531 | H | 29.4871669 | 3.7666626  | 40.5768443 |
| O | 30.5360304 | 7.0352998 | 41.7467554 | H | 34.0790477 | 8.0964374  | 45.8935640 |
| O | 30.5753038 | 4.8644965 | 42.3127089 | H | 30.5496622 | 5.0012543  | 44.7901128 |
| C | 29.9765871 | 5.9351838 | 41.9971893 | H | 28.7061423 | 3.9747516  | 46.0179690 |
| C | 32.4520635 | 6.7035993 | 45.8127344 | H | 29.7924270 | 7.4550787  | 33.3109502 |
| C | 33.2918839 | 7.5900440 | 46.4596335 | H | 39.3789138 | 6.3159161  | 37.3366388 |
| C | 31.3856996 | 6.0526300 | 46.5168354 | H | 33.8216426 | 8.5086440  | 48.3588908 |
| C | 30.4530529 | 5.1999649 | 45.8578810 | H | 32.0528516 | 7.3946007  | 49.6305060 |
| C | 29.4189148 | 4.6169154 | 46.5489900 | H | 27.7284346 | 3.6705226  | 47.9893674 |
| O | 32.7765052 | 7.3954428 | 43.5684535 | C | 35.6431230 | 8.2212798  | 42.2967872 |
| O | 32.7673341 | 5.1894672 | 44.0529640 | C | 34.9623143 | 8.2844464  | 40.8999742 |
| C | 32.6763085 | 6.4178393 | 44.3545446 | C | 35.7908210 | 9.0992644  | 39.8853752 |
| C | 33.1408303 | 7.8212828 | 47.8463307 | C | 36.2178222 | 10.4683498 | 40.4215677 |
| C | 32.1423279 | 7.1909350 | 48.5586335 | C | 37.0015625 | 10.3123062 | 41.7328829 |
| C | 31.2178384 | 6.2957754 | 47.9269344 | C | 36.1575092 | 9.5731453  | 42.7804421 |
| C | 29.2624482 | 4.8251495 | 47.9454824 | O | 33.7017145 | 8.8097283  | 41.0787796 |
| C | 30.1474170 | 5.6512319 | 48.6363554 | C | 37.3414984 | 6.8284821  | 43.5503808 |
| O | 28.2412305 | 4.2147559 | 48.6090320 | C | 38.6575426 | 7.2269125  | 43.7848531 |
| H | 25.9012184 | 7.8717144 | 43.0289998 | C | 39.2542214 | 6.9346628  | 45.0153779 |
| H | 24.6045223 | 6.2591006 | 41.7472161 | C | 38.5273283 | 6.2617006  | 46.0028598 |
| H | 28.1780194 | 2.1681329 | 39.2152649 | C | 37.2024001 | 5.8790698  | 45.7589326 |

|              |            |            |            |    |            |           |            |
|--------------|------------|------------|------------|----|------------|-----------|------------|
| C            | 36.6009321 | 6.1565787  | 44.5288483 | Cu | 32.6689823 | 6.9425462 | 41.4465686 |
| N            | 36.6989845 | 7.1223977  | 42.2750952 | Cu | 32.4268891 | 3.7768152 | 42.3255305 |
| H            | 35.1780337 | 9.1945061  | 38.9726891 | C  | 36.6488736 | 3.4796579 | 41.8212559 |
| H            | 34.9039623 | 7.2535714  | 40.4962573 | C  | 37.1722155 | 2.3892566 | 42.4912969 |
| H            | 34.8871502 | 7.8370823  | 42.9937301 | C  | 38.5374626 | 2.0620889 | 42.3335376 |
| H            | 35.3135332 | 11.0758758 | 40.6080958 | C  | 39.3484368 | 2.8205938 | 41.5165578 |
| H            | 36.8240654 | 11.0059843 | 39.6695666 | C  | 38.8359681 | 3.9169522 | 40.7466471 |
| H            | 37.9446389 | 9.7571067  | 41.5375061 | C  | 37.4389773 | 4.2307456 | 40.8884155 |
| H            | 37.3066618 | 11.2975625 | 42.1288604 | C  | 36.8815027 | 5.2502579 | 40.0662931 |
| H            | 35.2500073 | 10.1659372 | 42.9912358 | C  | 37.6661201 | 5.9414936 | 39.1743349 |
| H            | 36.6984066 | 9.4646394  | 43.7381469 | C  | 39.0593458 | 5.6829400 | 39.0703917 |
| H            | 36.6938027 | 8.5137346  | 39.6045454 | C  | 39.6502904 | 4.6890916 | 39.8499017 |
| H            | 39.2111735 | 7.7712159  | 43.0136957 | O  | 39.8197770 | 6.4077209 | 38.2051292 |
| H            | 40.2890518 | 7.2379970  | 45.2013462 | O  | 35.2271785 | 5.2205052 | 42.4231201 |
| H            | 38.9939337 | 6.0368324  | 46.9668838 | O  | 34.3465661 | 3.1562524 | 42.3991111 |
| H            | 36.6270780 | 5.3561158  | 46.5284758 | C  | 35.2958949 | 3.9408597 | 42.2216457 |
| H            | 35.5708320 | 5.8482988  | 44.3280930 | C  | 32.8744226 | 4.1577862 | 38.1958917 |
| H            | 37.3967441 | 7.2951520  | 41.5430821 | C  | 33.3303055 | 2.9132772 | 37.7901146 |
| H            | 36.0955749 | 6.2575264  | 41.9842378 | C  | 33.4062406 | 2.5997479 | 36.4180533 |
| H            | 24.5081895 | 4.2366842  | 40.1450673 | C  | 32.9756279 | 3.5060280 | 35.4716644 |
| H            | 40.7089313 | 4.2671270  | 39.9184677 | C  | 32.4451751 | 4.7856129 | 35.8334809 |
| H            | 31.4077396 | 5.6136038  | 33.6358734 | C  | 32.4259077 | 5.1257729 | 37.2355180 |
| H            | 30.0267551 | 5.7705100  | 49.7130541 | C  | 31.9070358 | 6.3987736 | 37.6125079 |
|              |            |            |            | C  | 31.4358732 | 7.2777416 | 36.6716550 |
| (S,S)-1-Int3 |            |            |            | C  | 31.4416315 | 6.9471751 | 35.2902117 |
| C            | 26.6610525 | 6.9078490  | 42.3215065 | C  | 31.9363633 | 5.7183871 | 34.8623079 |
| C            | 25.8535582 | 6.0221594  | 41.6389393 | O  | 30.9265339 | 7.9346460 | 34.4981646 |
| C            | 26.3823703 | 4.8696693  | 40.9720080 | O  | 33.2333755 | 5.5426870 | 40.1109321 |
| C            | 27.8034615 | 4.6408665  | 41.0710146 | O  | 32.4565592 | 3.4619034 | 40.4020597 |
| C            | 27.5569350 | 2.6584059  | 39.6822765 | C  | 32.8447165 | 4.4238409 | 39.6693047 |
| C            | 26.1562680 | 2.8734089  | 39.5798717 | C  | 28.6144012 | 5.5836593 | 41.7858047 |
| C            | 25.5615130 | 3.9616001  | 40.2113361 | C  | 28.0544068 | 6.7035198 | 42.3778949 |
| O            | 25.5199752 | 1.9251993  | 38.8295676 | C  | 28.3562959 | 3.5106357 | 40.3994886 |

|   |            |           |            |   |            |            |            |
|---|------------|-----------|------------|---|------------|------------|------------|
| O | 30.8041390 | 6.4545538 | 41.7425500 | H | 33.7603995 | 7.5136264  | 45.7326270 |
| O | 30.5386247 | 4.2715155 | 42.2084806 | H | 30.2326950 | 4.3211515  | 44.8788280 |
| C | 30.0988657 | 5.4234286 | 41.9099377 | H | 28.3701534 | 3.4286957  | 46.1907242 |
| C | 32.1793451 | 6.0674682 | 45.7686290 | H | 30.9194655 | 7.6991591  | 33.5572145 |
| C | 32.9467432 | 7.0831307 | 46.3178494 | H | 39.2655148 | 7.0594538  | 37.7456673 |
| C | 31.0686339 | 5.5193549 | 46.5015451 | H | 33.3360888 | 8.3187976  | 48.0606932 |
| C | 30.1337236 | 4.6124713 | 45.9241893 | H | 31.5844429 | 7.2878380  | 49.4290042 |
| C | 29.0896497 | 4.1083456 | 46.6629352 | H | 27.4353604 | 3.2445855  | 48.2057564 |
| O | 33.2636876 | 6.2592458 | 43.6479593 | C | 35.3812190 | 8.9402013  | 43.0668589 |
| O | 32.3831258 | 4.2921759 | 44.2108317 | C | 35.1987112 | 8.3622390  | 41.6152661 |
| C | 32.6197075 | 5.5133816 | 44.4539305 | C | 35.9695862 | 9.2060293  | 40.5861378 |
| C | 32.7114979 | 7.5270792 | 47.6359520 | C | 35.5163983 | 10.6725279 | 40.6280386 |
| C | 31.7218197 | 6.9455160 | 48.3983468 | C | 35.6633469 | 11.2663143 | 42.0383648 |
| C | 30.8600396 | 5.9310565 | 47.8675157 | C | 34.9346113 | 10.4104573 | 43.0890395 |
| C | 28.9367788 | 4.4326240 | 48.0375453 | O | 33.8515740 | 8.3241325  | 41.3019463 |
| C | 29.8090953 | 5.3337945 | 48.6443354 | C | 37.3069857 | 7.6003788  | 43.9780531 |
| O | 27.9331847 | 3.8656015 | 48.7619266 | C | 38.6883498 | 7.3625963  | 43.7955690 |
| H | 26.2189118 | 7.7797443 | 42.8139563 | C | 39.2801058 | 6.1779533  | 44.2354442 |
| H | 24.7784537 | 6.2262043 | 41.6094970 | C | 38.5154001 | 5.1893811  | 44.8656252 |
| H | 27.9764695 | 1.7953775 | 39.1585443 | C | 37.1502123 | 5.4214018  | 45.0628193 |
| H | 24.5690147 | 2.0933860 | 38.7407078 | C | 36.5519047 | 6.6052774  | 44.6333181 |
| H | 36.5389627 | 1.8270580 | 43.1825360 | N | 36.7440581 | 8.8007383  | 43.5536212 |
| H | 38.9594665 | 1.2168347 | 42.8857898 | H | 35.7966538 | 8.7717016  | 39.5847746 |
| H | 40.4085985 | 2.5580883 | 41.4468584 | H | 35.6182568 | 7.3379577  | 41.6396962 |
| H | 35.8153612 | 5.4794788 | 40.1151296 | H | 34.7086960 | 8.3548790  | 43.7097109 |
| H | 37.2145933 | 6.7158851 | 38.5432832 | H | 34.4526768 | 10.7112565 | 40.3304773 |
| H | 33.6382905 | 2.1859368 | 38.5451532 | H | 36.0829076 | 11.2766035 | 39.8954434 |
| H | 33.7989105 | 1.6278339 | 36.1027843 | H | 36.7393381 | 11.3517155 | 42.2961958 |
| H | 33.0415230 | 3.2224607 | 34.4161498 | H | 35.2698960 | 12.2991770 | 42.0631820 |
| H | 31.8782255 | 6.6784796 | 38.6645580 | H | 33.8521020 | 10.4228184 | 42.8700971 |
| H | 31.0309381 | 8.2516249 | 36.9591052 | H | 35.0802649 | 10.8237477 | 44.1035927 |
| H | 28.7022154 | 7.4167541 | 42.8936176 | H | 37.0567799 | 9.1299865  | 40.7864161 |
| H | 29.4289368 | 3.3220620 | 40.4501142 | H | 39.2954477 | 8.1210591  | 43.2878279 |

|                |            |           |            |   |            |           |            |
|----------------|------------|-----------|------------|---|------------|-----------|------------|
| H              | 40.3505060 | 6.0177437 | 44.0721829 | O | 34.9046836 | 5.5684278 | 40.0726549 |
| H              | 38.9751549 | 4.2516593 | 45.1904769 | O | 34.2399618 | 4.4148709 | 41.8740422 |
| H              | 36.5294255 | 4.6633631 | 45.5535502 | C | 35.1123477 | 4.7076435 | 41.0343893 |
| H              | 35.4828863 | 6.7454107 | 44.7849255 | C | 31.7907511 | 4.7790419 | 38.0552739 |
| H              | 37.4089476 | 9.4223238 | 43.1054792 | C | 31.8676909 | 3.4311793 | 37.7214623 |
| H              | 34.3732022 | 5.5672648 | 42.8920594 | C | 31.8154373 | 3.0239274 | 36.3768412 |
| H              | 24.4934655 | 4.1513909 | 40.1049382 | C | 31.6765775 | 3.9611564 | 35.3749949 |
| H              | 40.7315291 | 4.5561798 | 39.8135160 | C | 31.5530599 | 5.3599845 | 35.6518387 |
| H              | 31.9132491 | 5.4569590 | 33.8043913 | C | 31.6076531 | 5.7763693 | 37.0341336 |
| H              | 29.7329490 | 5.5033115 | 49.7183616 | C | 31.4501294 | 7.1631614 | 37.3238069 |
|                |            |           |            | C | 31.2532899 | 8.0750954 | 36.3183658 |
| (S,S)-1-Int3-2 |            |           |            | C | 31.2201189 | 7.6772585 | 34.9554851 |
| C              | 26.0457990 | 7.0538801 | 42.2920286 | C | 31.3822725 | 6.3383847 | 34.6096864 |
| C              | 25.4018276 | 6.0160968 | 41.6517091 | O | 31.0314344 | 8.7194857 | 34.0931381 |
| C              | 26.1158987 | 4.9176346 | 41.0689858 | O | 32.4421201 | 6.2418241 | 39.8660203 |
| C              | 27.5498731 | 4.9133646 | 41.2142300 | O | 31.8296839 | 4.1735723 | 40.3438026 |
| C              | 27.6544209 | 2.8315442 | 39.9625522 | C | 31.9951152 | 5.0987482 | 39.4937565 |
| C              | 26.2432347 | 2.8368836 | 39.7901387 | C | 28.1868443 | 6.0248270 | 41.8533092 |
| C              | 25.4704111 | 3.8563706 | 40.3359165 | C | 27.4521431 | 7.0795648 | 42.3664667 |
| O              | 25.7817774 | 1.7719173 | 39.0704892 | C | 28.2906977 | 3.8352216 | 40.6468426 |
| Cu             | 31.9691762 | 7.8625176 | 41.3840851 | O | 30.1394382 | 7.2253230 | 41.4030918 |
| Cu             | 32.3001427 | 4.9353908 | 42.1089266 | O | 30.3630087 | 5.2148160 | 42.3845549 |
| C              | 36.4748286 | 4.1287232 | 41.1035250 | C | 29.6751553 | 6.1585504 | 41.8840558 |
| C              | 36.8246658 | 3.5630895 | 42.3212072 | C | 32.1425868 | 7.0992716 | 45.6558520 |
| C              | 38.1375140 | 3.1115128 | 42.5537067 | C | 32.8331111 | 8.1292232 | 46.2661884 |
| C              | 39.1015230 | 3.2558646 | 41.5812642 | C | 31.2725421 | 6.2451347 | 46.4118889 |
| C              | 38.8044968 | 3.8181822 | 40.2978695 | C | 30.4813651 | 5.2358287 | 45.7941522 |
| C              | 37.4422784 | 4.2177194 | 40.0343726 | C | 29.6174852 | 4.4649506 | 46.5345901 |
| C              | 37.1298971 | 4.6581461 | 38.7169366 | O | 32.1000649 | 7.8435646 | 43.4048581 |
| C              | 38.0999405 | 4.7700209 | 37.7495358 | O | 32.6987322 | 5.7189180 | 43.8307510 |
| C              | 39.4568576 | 4.4768313 | 38.0334417 | C | 32.3178809 | 6.8813505 | 44.1820005 |
| C              | 39.8153403 | 3.9893814 | 39.2904212 | C | 32.7350830 | 8.3100131 | 47.6650171 |
| O              | 40.4055818 | 4.6607828 | 37.0749141 | C | 31.9258354 | 7.4926412 | 48.4253588 |

|   |            |            |            |             |            |            |            |
|---|------------|------------|------------|-------------|------------|------------|------------|
| C | 31.1452702 | 6.4461115  | 47.8336818 | C           | 34.9904189 | 9.2951013  | 43.2077197 |
| C | 29.4934898 | 4.6447726  | 47.9380255 | O           | 33.2684134 | 9.0165970  | 40.8242087 |
| C | 30.2463534 | 5.6199830  | 48.5918141 | C           | 37.0986167 | 6.9711016  | 43.0351321 |
| O | 28.6264389 | 3.8672529  | 48.6445109 | C           | 38.5082243 | 6.8697644  | 43.0382062 |
| H | 25.4621410 | 7.8748541  | 42.7204543 | C           | 39.1781232 | 6.1558512  | 44.0289987 |
| H | 24.3104647 | 6.0619379  | 41.5871997 | C           | 38.4671101 | 5.5324920  | 45.0628246 |
| H | 28.2166971 | 2.0086919  | 39.5131772 | C           | 37.0715890 | 5.6333531  | 45.0727342 |
| H | 24.8244115 | 1.8125513  | 38.9207621 | C           | 36.3865864 | 6.3347109  | 44.0775011 |
| H | 36.0791079 | 3.5174036  | 43.1154147 | N           | 36.4630383 | 7.6520680  | 42.0091610 |
| H | 38.3978505 | 2.6870467  | 43.5264682 | H           | 34.9399552 | 10.4136933 | 39.4242890 |
| H | 40.1227014 | 2.9311031  | 41.8036205 | H           | 34.8539320 | 7.9815669  | 39.9849133 |
| H | 36.1051621 | 4.9065581  | 38.4565781 | H           | 34.4482060 | 7.3647830  | 42.3854269 |
| H | 37.8242634 | 5.1078961  | 36.7432353 | H           | 34.2021741 | 11.4111371 | 41.5639808 |
| H | 31.9965626 | 2.6962000  | 38.5180742 | H           | 35.8326805 | 12.0148257 | 41.1827371 |
| H | 31.8957850 | 1.9618357  | 36.1256382 | H           | 36.8363400 | 10.3492768 | 42.7632642 |
| H | 31.6543973 | 3.6042060  | 34.3406361 | H           | 35.6305685 | 11.3331784 | 43.6106274 |
| H | 31.4907602 | 7.5050774  | 38.3558167 | H           | 33.9181525 | 9.5206313  | 43.3260464 |
| H | 31.1215363 | 9.1376584  | 36.5391528 | H           | 35.3569860 | 8.9020705  | 44.1722949 |
| H | 27.9713110 | 7.9295621  | 42.8169328 | H           | 36.4338334 | 9.8155462  | 40.1682584 |
| H | 29.3767822 | 3.8086573  | 40.7477023 | H           | 39.0730199 | 7.3695215  | 42.2440319 |
| H | 33.4683007 | 8.7841022  | 45.6653065 | H           | 40.2708864 | 6.0901980  | 43.9923944 |
| H | 30.5375220 | 5.0770121  | 44.7169695 | H           | 38.9927246 | 4.9809744  | 45.8481816 |
| H | 29.0070286 | 3.7031034  | 46.0353389 | H           | 36.4920470 | 5.1506744  | 45.8671970 |
| H | 30.9641182 | 8.4363593  | 33.1677459 | H           | 35.2955971 | 6.3579930  | 44.0995072 |
| H | 40.0009608 | 5.0315543  | 36.2740947 | H           | 37.0854626 | 8.1489991  | 41.3820749 |
| H | 33.3078048 | 9.1080190  | 48.1477556 | H           | 33.9612015 | 5.9419056  | 40.0563998 |
| H | 31.8747423 | 7.6615453  | 49.5056031 | H           | 24.3929000 | 3.9023323  | 40.1780436 |
| H | 28.1724210 | 3.2540405  | 48.0438316 | H           | 40.8732301 | 3.8149586  | 39.4866667 |
| C | 35.1199879 | 8.2013728  | 42.1286745 | H           | 31.4126462 | 6.0401633  | 33.5617323 |
| C | 34.6270346 | 8.7473484  | 40.7540980 | H           | 30.1178180 | 5.7474480  | 49.6666619 |
| C | 35.3685744 | 10.0472294 | 40.3735121 |             |            |            |            |
| C | 35.2613419 | 11.1126458 | 41.4707193 |             |            |            |            |
| C | 35.7514133 | 10.5693019 | 42.8208146 |             |            |            |            |
|   |            |            |            | (S,S)-1-TS3 |            |            |            |
|   |            |            |            | C           | 27.0500771 | 7.6142467  | 41.4221955 |

|    |            |           |            |   |            |           |            |
|----|------------|-----------|------------|---|------------|-----------|------------|
| C  | 26.1497503 | 6.6484435 | 41.0245033 | O | 30.4709335 | 7.7038164 | 34.5875204 |
| C  | 26.5656926 | 5.3303198 | 40.6518062 | O | 33.6421820 | 5.9975150 | 40.0665510 |
| C  | 27.9741585 | 5.0263705 | 40.7427069 | O | 32.9742190 | 3.8765050 | 40.3789030 |
| C  | 27.5123006 | 2.7883326 | 39.9032627 | C | 33.3465590 | 4.8420050 | 39.6488520 |
| C  | 26.1221604 | 3.0709977 | 39.8337411 | C | 28.8845214 | 6.0448654 | 41.1905385 |
| C  | 25.6386715 | 4.3243790 | 40.1991248 | C | 28.4253573 | 7.3178787 | 41.4948520 |
| O  | 25.3809169 | 2.0141612 | 39.3825918 | C | 28.4084124 | 3.7290409 | 40.3415373 |
| Cu | 33.0159430 | 6.8557910 | 41.7684560 | O | 31.1325370 | 6.7783650 | 41.2452450 |
| Cu | 32.5541730 | 4.1415050 | 42.2547120 | O | 30.7029780 | 4.6471410 | 41.8064650 |
| C  | 36.8267728 | 4.0699694 | 43.2507190 | C | 30.3457310 | 5.7994140 | 41.4148920 |
| C  | 37.5257930 | 3.6480354 | 44.3640168 | C | 31.6627751 | 5.6723996 | 45.9449078 |
| C  | 38.8773049 | 3.2576698 | 44.2282862 | C | 32.3101635 | 6.7335064 | 46.5582377 |
| C  | 39.5194561 | 3.3607469 | 43.0132511 | C | 30.6918691 | 4.8931890 | 46.6623456 |
| C  | 38.8498612 | 3.8451011 | 41.8424157 | C | 29.9234444 | 3.8618612 | 46.0498894 |
| C  | 37.4537514 | 4.1703134 | 41.9654940 | C | 29.0062226 | 3.1370750 | 46.7738398 |
| C  | 36.7627808 | 4.6540341 | 40.8192932 | O | 32.5278130 | 6.3160870 | 43.8333000 |
| C  | 37.4049023 | 4.8012514 | 39.6151393 | O | 32.0552210 | 4.1652840 | 44.1358260 |
| C  | 38.7881517 | 4.5021738 | 39.4861683 | C | 32.0819990 | 5.3705690 | 44.5432370 |
| C  | 39.5134095 | 4.0361466 | 40.5827146 | C | 32.0639260 | 7.0330286 | 47.9134455 |
| O  | 39.4077946 | 4.6844657 | 38.2891299 | C | 31.1742346 | 6.2741846 | 48.6417996 |
| O  | 35.2313480 | 5.5115570 | 44.2057780 | C | 30.4535935 | 5.1830131 | 48.0542574 |
| O  | 34.5287690 | 3.9948270 | 42.6876800 | C | 28.8122678 | 3.3727654 | 48.1616687 |
| C  | 35.4123470 | 4.5147780 | 43.3745380 | C | 29.5195525 | 4.3864275 | 48.8024671 |
| C  | 33.4412722 | 4.5635865 | 38.1812928 | O | 27.9295214 | 2.6100936 | 48.8652232 |
| C  | 34.1745810 | 3.4641828 | 37.7703117 | H | 26.6951113 | 8.6142590 | 41.6905547 |
| C  | 34.2591692 | 3.1544340 | 36.3961982 | H | 25.0884466 | 6.9147705 | 40.9933230 |
| C  | 33.5713274 | 3.9067356 | 35.4657402 | H | 27.8437367 | 1.7954183 | 39.5873537 |
| C  | 32.7657001 | 5.0298002 | 35.8420141 | H | 24.4336590 | 2.2143552 | 39.3252753 |
| C  | 32.7291050 | 5.3769619 | 37.2415803 | H | 37.0322846 | 3.6102503 | 45.3391030 |
| C  | 31.9314215 | 6.4857786 | 37.6509979 | H | 39.4232469 | 2.8900615 | 45.1025315 |
| C  | 31.2176531 | 7.2106521 | 36.7325650 | H | 40.5734216 | 3.0731757 | 42.9532074 |
| C  | 31.2415253 | 6.8748640 | 35.3517848 | H | 35.7136464 | 4.9360892 | 40.8862186 |
| C  | 31.9969243 | 5.7967195 | 34.8963724 | H | 36.8458372 | 5.1752880 | 38.7493867 |

|   |            |            |            |    |            |            |            |
|---|------------|------------|------------|----|------------|------------|------------|
| H | 34.6824535 | 2.8452788  | 38.5150057 | H  | 35.0438389 | 10.0834882 | 39.5463559 |
| H | 34.8591296 | 2.2993431  | 36.0685017 | H  | 36.4814385 | 11.1075703 | 41.2890467 |
| H | 33.6455672 | 3.6191610  | 34.4121192 | H  | 34.8184721 | 11.6585509 | 41.5255426 |
| H | 31.8766420 | 6.7607087  | 38.7054979 | H  | 34.4447237 | 9.9692139  | 43.3107524 |
| H | 30.5973297 | 8.0572403  | 37.0386943 | H  | 35.8464091 | 10.9843948 | 43.7278003 |
| H | 29.1413028 | 8.0776534  | 41.8154580 | H  | 36.8863042 | 8.6186083  | 40.4432548 |
| H | 29.4684261 | 3.4833570  | 40.3801719 | H  | 40.1152665 | 10.2330747 | 43.5737665 |
| H | 33.0268072 | 7.3203269  | 45.9795962 | H  | 41.9060399 | 9.1655567  | 44.9048161 |
| H | 30.0603216 | 3.6497510  | 44.9900824 | H  | 41.5662993 | 6.8864068  | 45.8953725 |
| H | 28.4201066 | 2.3534210  | 46.2786023 | H  | 39.3822838 | 5.7159937  | 45.5170020 |
| H | 30.4789459 | 7.4673489  | 33.6470249 | H  | 37.5994834 | 6.7576143  | 44.1993283 |
| H | 38.7803312 | 5.0537533  | 37.6460039 | H  | 37.9731096 | 10.1356118 | 42.6950744 |
| H | 32.5898103 | 7.8656492  | 48.3904868 | H  | 34.4268520 | 6.0636090  | 43.9638350 |
| H | 31.0153159 | 6.5282294  | 49.6943536 | H  | 24.5741737 | 4.5457375  | 40.1222398 |
| H | 27.5407875 | 1.9361512  | 48.2840752 | H  | 40.5916898 | 3.9058135  | 40.4911095 |
| C | 36.3130028 | 8.9363017  | 43.1664676 | H  | 31.9717673 | 5.5133661  | 33.8441631 |
| C | 35.7995740 | 7.8654640  | 42.1431020 | H  | 29.4122117 | 4.5247726  | 49.8782947 |
| C | 35.8315753 | 8.4152007  | 40.7086813 |    |            |            |            |
| C | 34.9971960 | 9.6961118  | 40.5802820 |    | (S,S)-1-PC |            |            |
| C | 35.4669199 | 10.7648335 | 41.5783697 | C  | 27.0179093 | 7.6003048  | 41.6907634 |
| C | 35.4779055 | 10.2205511 | 43.0174441 | C  | 26.1217925 | 6.6758930  | 41.1943980 |
| O | 34.5273500 | 7.5205700  | 42.5740630 | C  | 26.5386955 | 5.3851366  | 40.7346883 |
| C | 38.7178490 | 8.5834844  | 43.7784532 | C  | 27.9398370 | 5.0644036  | 40.8426594 |
| C | 39.9558909 | 9.2332028  | 43.9947235 | C  | 27.5090806 | 2.9112252  | 39.7971092 |
| C | 40.9621728 | 8.6310995  | 44.7498114 | C  | 26.1214505 | 3.2052383  | 39.7124834 |
| C | 40.7739837 | 7.3606907  | 45.3082283 | C  | 25.6269847 | 4.4216346  | 40.1755299 |
| C | 39.5531633 | 6.7121790  | 45.0982459 | O  | 25.3917408 | 2.1957793  | 39.1493654 |
| C | 38.5331843 | 7.3035117  | 44.3485193 | Cu | 33.0829104 | 6.2774051  | 41.4850027 |
| N | 37.7321817 | 9.2099704  | 43.0308414 | Cu | 32.4070034 | 3.8758760  | 42.1962857 |
| H | 35.4562624 | 7.6365810  | 40.0232230 | C  | 36.5850700 | 3.8686409  | 41.9058098 |
| H | 36.4859889 | 6.9957277  | 42.2051488 | C  | 37.1235876 | 3.1053521  | 42.9226202 |
| H | 36.1298495 | 8.5145168  | 44.1705096 | C  | 38.5156878 | 2.8726243  | 42.9669847 |
| H | 33.9349426 | 9.4553102  | 40.7782913 | C  | 39.3413556 | 3.3792899  | 41.9874348 |



|   |            |           |            |   |            |           |            |
|---|------------|-----------|------------|---|------------|-----------|------------|
| C | 38.8262310 | 4.1354863 | 40.8839512 | C | 30.2938668 | 4.9389439 | 45.8423327 |
| C | 37.4076630 | 4.3778447 | 40.8478065 | C | 29.2245674 | 4.4867627 | 46.5770520 |
| C | 36.8655038 | 5.0776692 | 39.7323833 | O | 32.8988283 | 6.7288804 | 43.4383042 |
| C | 37.6792115 | 5.5415886 | 38.7254832 | O | 32.5708713 | 4.5802079 | 44.0281640 |
| C | 39.0852552 | 5.3423710 | 38.7714054 | C | 32.6464309 | 5.8179168 | 44.2809872 |
| C | 39.6605846 | 4.6401552 | 39.8289955 | C | 33.2391941 | 7.3988444 | 47.6657397 |
| O | 39.8720751 | 5.8298869 | 37.7703168 | C | 32.2027120 | 6.8927975 | 48.4209457 |
| O | 34.8573734 | 5.4507816 | 41.8335827 | C | 31.1962366 | 6.0481424 | 47.8483628 |
| O | 34.2957805 | 3.3057979 | 42.1944605 | C | 29.1211275 | 4.7611575 | 47.9673661 |
| C | 35.1364727 | 4.2246910 | 41.9771701 | C | 30.0891881 | 5.5347443 | 48.6063895 |
| C | 32.4807001 | 3.9403653 | 37.9765687 | O | 28.0660943 | 4.2705663 | 48.6751147 |
| C | 32.9464897 | 2.7109733 | 37.5443582 | H | 26.6613904 | 8.5810088 | 42.0212384 |
| C | 32.9363727 | 2.4049281 | 36.1666716 | H | 25.0643775 | 6.9556825 | 41.1459738 |
| C | 32.4441447 | 3.3132549 | 35.2517716 | H | 27.8498456 | 1.9504314 | 39.4024363 |
| C | 31.9049134 | 4.5788775 | 35.6522862 | H | 24.4496884 | 2.4116260 | 39.0671272 |
| C | 31.9224739 | 4.8892319 | 37.0582726 | H | 36.4703425 | 2.7240240 | 43.7109582 |
| C | 31.3396414 | 6.1158529 | 37.4940899 | H | 38.9422966 | 2.3013373 | 43.7967450 |
| C | 30.7921417 | 6.9916476 | 36.5926145 | H | 40.4168176 | 3.1908784 | 42.0607162 |
| C | 30.8033869 | 6.7133313 | 35.1994475 | H | 35.7882914 | 5.2381979 | 39.6584550 |
| C | 31.3523458 | 5.5273198 | 34.7209615 | H | 37.2401948 | 6.0707205 | 37.8709549 |
| O | 30.2440812 | 7.7078233 | 34.4464646 | H | 33.3420198 | 1.9991858 | 38.2738894 |
| O | 33.1220324 | 5.4051286 | 39.7018201 | H | 33.3266607 | 1.4424211 | 35.8209731 |
| O | 32.2455872 | 3.4133214 | 40.2755830 | H | 32.4615429 | 3.0401785 | 34.1914622 |
| C | 32.6188618 | 4.2761927 | 39.4258329 | H | 31.3168870 | 6.3637101 | 38.5561283 |
| C | 28.8391009 | 6.0361443 | 41.3934405 | H | 30.3316457 | 7.9271188 | 36.9209457 |
| C | 28.3906208 | 7.2882972 | 41.7784009 | H | 29.1064975 | 8.0162896 | 42.1685796 |
| C | 28.3905980 | 3.8050652 | 40.3477840 | H | 29.4492842 | 3.5483157 | 40.3966231 |
| O | 31.1288217 | 6.6079591 | 41.2497411 | H | 34.1869602 | 7.4670029 | 45.7052594 |
| O | 30.5749466 | 4.6117106 | 42.1283146 | H | 30.3444760 | 4.7012643 | 44.7785090 |
| C | 30.2880113 | 5.7284169 | 41.5971758 | H | 28.4392760 | 3.8977173 | 46.0882331 |
| C | 32.4355417 | 6.2261123 | 45.7065681 | H | 30.2142786 | 7.4910914 | 33.5015901 |
| C | 33.3551957 | 7.0746034 | 46.2952795 | H | 39.3185610 | 6.2581557 | 37.0973744 |
| C | 31.3180859 | 5.7206940 | 46.4500655 | H | 33.9852559 | 8.0505708 | 48.1310106 |

|   |            |            |            |    |            |           |            |
|---|------------|------------|------------|----|------------|-----------|------------|
| H | 32.1480059 | 7.1567116  | 49.4818450 | H  | 24.5621073 | 4.6438441 | 40.1067876 |
| H | 27.5030248 | 3.7331372  | 48.0946018 | H  | 40.7396047 | 4.4862005 | 39.8379513 |
| C | 35.7090876 | 8.2691424  | 42.6218601 | H  | 31.3807549 | 5.3237223 | 33.6505375 |
| C | 35.3485130 | 8.3384886  | 41.1230262 | H  | 30.0044047 | 5.7007357 | 49.6803192 |
| C | 35.8815373 | 9.5964677  | 40.4345791 |    |            |           |            |
| C | 35.4953034 | 10.8818743 | 41.1841901 |    | (S,S)-2-RC |           |            |
| C | 35.9242146 | 10.8163654 | 42.6590148 | C  | 26.9386991 | 7.1243402 | 41.7121512 |
| C | 35.3339548 | 9.5787657  | 43.3504392 | C  | 26.0457856 | 6.1838240 | 41.2389237 |
| O | 33.9151667 | 8.2324678  | 40.9582965 | C  | 26.4736861 | 4.9023961 | 40.7600382 |
| C | 37.5522460 | 7.0585008  | 43.8109143 | C  | 27.8824488 | 4.6028432 | 40.8392044 |
| C | 38.9345253 | 7.0067931  | 44.1001116 | C  | 27.4549550 | 2.4362775 | 39.8202015 |
| C | 39.4345749 | 6.1631765  | 45.0904577 | C  | 26.0638430 | 2.7176115 | 39.7467726 |
| C | 38.5742100 | 5.3514010  | 45.8402784 | C  | 25.5668261 | 3.9346067 | 40.2036500 |
| C | 37.2036001 | 5.4010138  | 45.5676325 | O  | 25.3358099 | 1.7002095 | 39.2044510 |
| C | 36.6933492 | 6.2327573  | 44.5694989 | Cu | 33.0526000 | 6.0107390 | 41.4984387 |
| N | 37.0974959 | 7.8848030  | 42.7912266 | Cu | 32.4276708 | 3.5584065 | 42.0470740 |
| H | 35.5163020 | 9.6146864  | 39.3927783 | C  | 36.6000099 | 3.6920591 | 41.7508430 |
| H | 35.7392157 | 7.4356851  | 40.6391127 | C  | 37.1229790 | 2.7375834 | 42.6034793 |
| H | 35.0982567 | 7.4621099  | 43.0302174 | C  | 38.5025207 | 2.4378745 | 42.5642659 |
| H | 34.3975885 | 11.0296104 | 41.1285372 | C  | 39.3330303 | 3.0786112 | 41.6695112 |
| H | 35.9426242 | 11.7596655 | 40.6846076 | C  | 38.8332197 | 4.0441710 | 40.7355226 |
| H | 37.0304324 | 10.7751834 | 42.7139284 | C  | 37.4245709 | 4.3436514 | 40.7747786 |
| H | 35.6234496 | 11.7363765 | 43.1915205 | C  | 36.8939534 | 5.2466540 | 39.8086458 |
| H | 34.2287449 | 9.6631354  | 43.3853084 | C  | 37.7112032 | 5.8428143 | 38.8786392 |
| H | 35.6642298 | 9.5083312  | 44.4017972 | C  | 39.1104096 | 5.5972230 | 38.8665900 |
| H | 36.9849449 | 9.5176512  | 40.3830115 | C  | 39.6735188 | 4.7044630 | 39.7760506 |
| H | 39.6197762 | 7.6435404  | 43.5305306 | O  | 39.9022090 | 6.2333398 | 37.9584556 |
| H | 40.5135289 | 6.1458039  | 45.2790710 | O  | 34.8535070 | 5.2701064 | 41.8789711 |
| H | 38.9645335 | 4.6939342  | 46.6227957 | O  | 34.3306016 | 3.0830539 | 41.9876927 |
| H | 36.5054047 | 4.7755795  | 46.1345178 | C  | 35.1523489 | 4.0418675 | 41.8808344 |
| H | 35.6239417 | 6.2116450  | 44.3600497 | C  | 32.6164379 | 3.9143436 | 37.8352214 |
| H | 37.7916269 | 8.5212298  | 42.4152138 | C  | 33.1891279 | 2.7552635 | 37.3448664 |
| H | 33.4612463 | 8.9445178  | 41.4412031 | C  | 33.1663356 | 2.4975311 | 35.9575502 |

|   |            |           |            |   |            |            |            |
|---|------------|-----------|------------|---|------------|------------|------------|
| C | 32.5463163 | 3.3759075 | 35.0933736 | H | 27.7974909 | 1.4726614  | 39.4343862 |
| C | 31.9042002 | 4.5708783 | 35.5560898 | H | 24.3944958 | 1.9167440  | 39.1120358 |
| C | 31.9531822 | 4.8416202 | 36.9690393 | H | 36.4621731 | 2.2366373  | 43.3157983 |
| C | 31.2987630 | 6.0071382 | 37.4658377 | H | 38.9150302 | 1.6945645  | 43.2537827 |
| C | 30.6235279 | 6.8482821 | 36.6177193 | H | 40.3983822 | 2.8275218  | 41.6715336 |
| C | 30.5646930 | 6.5863018 | 35.2221783 | H | 35.8251419 | 5.4632705  | 39.7910751 |
| C | 31.2152304 | 5.4832885 | 34.6793349 | H | 37.2813372 | 6.5258931  | 38.1361893 |
| O | 29.8358801 | 7.5157255 | 34.5321413 | H | 33.6686645 | 2.0566590  | 38.0357137 |
| O | 33.1902871 | 5.3029085 | 39.6497219 | H | 33.6398837 | 1.5920273  | 35.5650030 |
| O | 32.3057616 | 3.2780990 | 40.0879560 | H | 32.5416403 | 3.1316828  | 34.0262965 |
| C | 32.7096662 | 4.1849848 | 39.3020626 | H | 31.3214272 | 6.2311213  | 38.5338991 |
| C | 28.7797437 | 5.5914513 | 41.3635382 | H | 30.1010522 | 7.7306012  | 36.9945827 |
| C | 28.3194154 | 6.8371370 | 41.7580340 | H | 29.0326136 | 7.5790600  | 42.1250344 |
| C | 28.3378325 | 3.3455827 | 40.3428794 | H | 29.4006523 | 3.1048347  | 40.3708917 |
| O | 31.0562778 | 6.2161285 | 41.1973747 | H | 33.9384046 | 7.1182092  | 45.6182870 |
| O | 30.5584914 | 4.1912551 | 42.0385412 | H | 30.4516625 | 3.8865608  | 44.8290232 |
| C | 30.2405843 | 5.3113376 | 41.5367253 | H | 28.6958549 | 2.8636776  | 46.2000375 |
| C | 32.3455265 | 5.6888836 | 45.6801005 | H | 29.6839046 | 7.2633862  | 33.6080099 |
| C | 33.1800042 | 6.6380272 | 46.2422823 | H | 39.3613467 | 6.8235499  | 37.4092641 |
| C | 31.3165714 | 5.0584843 | 46.4551271 | H | 33.7483240 | 7.6868645  | 48.0585191 |
| C | 30.3888056 | 4.1381303 | 45.8881705 | H | 32.0421576 | 6.6220642  | 49.4520283 |
| C | 29.4020613 | 3.5677569 | 46.6561713 | H | 27.7925731 | 2.6687800  | 48.2243032 |
| O | 32.7337751 | 6.3066933 | 43.4399442 | C | 32.4953878 | 8.9981536  | 40.5853968 |
| O | 32.5612534 | 4.1151613 | 43.9296374 | C | 33.0735028 | 9.0902007  | 41.9430104 |
| C | 32.5591551 | 5.3422907 | 44.2406554 | C | 34.1267159 | 10.1223627 | 42.2742294 |
| C | 33.0651102 | 6.9571246 | 47.6127951 | C | 34.8410350 | 10.6421788 | 41.0163984 |
| C | 32.1021051 | 6.3533141 | 48.3928018 | C | 33.8214062 | 11.0905878 | 39.9590824 |
| C | 31.1823127 | 5.3977345 | 47.8498315 | C | 32.9306094 | 9.9317691  | 39.4706870 |
| C | 29.2786949 | 3.8735178 | 48.0380132 | O | 33.5133462 | 8.0647109  | 41.0285283 |
| C | 30.1484351 | 4.7842757 | 48.6349375 | C | 26.5367101 | 7.4625656  | 37.3947392 |
| O | 28.3008771 | 3.2823544 | 48.7790039 | C | 25.3972975 | 7.9761563  | 38.0543064 |
| H | 26.5738083 | 8.0991361 | 42.0500131 | C | 24.2836787 | 8.4041715  | 37.3288156 |
| H | 24.9834107 | 6.4451355 | 41.2202856 | C | 24.2700400 | 8.3407936  | 35.9288746 |



|   |            |           |            |   |            |            |            |
|---|------------|-----------|------------|---|------------|------------|------------|
| C | 28.3120627 | 3.6538095 | 40.1485564 | H | 29.3735892 | 3.4157313  | 40.2064802 |
| O | 30.9048455 | 6.4395772 | 41.5937181 | H | 34.1344009 | 7.0599143  | 45.8349979 |
| O | 30.5049706 | 4.2634407 | 41.9820829 | H | 30.3073272 | 4.2868089  | 44.8517722 |
| C | 30.1309394 | 5.4473520 | 41.7164141 | H | 28.3766490 | 3.4908213  | 46.1215851 |
| C | 32.3686280 | 5.8464990 | 45.7941078 | H | 29.5095252 | 7.2887552  | 33.4017050 |
| C | 33.2948176 | 6.6664006 | 46.4137539 | H | 39.4218662 | 6.0193300  | 36.7766283 |
| C | 31.2410395 | 5.3341268 | 46.5222061 | H | 33.9158361 | 7.6069894  | 48.2705850 |
| C | 30.2277141 | 4.5434796 | 45.9073696 | H | 32.0363864 | 6.7500105  | 49.5760066 |
| C | 29.1451695 | 4.0921273 | 46.6226833 | H | 27.3826571 | 3.3664418  | 48.1041162 |
| O | 32.9303362 | 6.4698739 | 43.5820208 | C | 33.2961504 | 9.4141259  | 42.6380613 |
| O | 32.4022147 | 4.3225205 | 43.9830047 | C | 33.7347246 | 9.8134689  | 41.2827009 |
| C | 32.5805348 | 5.5222711 | 44.3441080 | C | 32.9439161 | 10.8188191 | 40.4629470 |
| C | 33.1665763 | 6.9738502 | 47.7853864 | C | 31.8608111 | 11.5541585 | 41.2750548 |
| C | 32.1052515 | 6.4858424 | 48.5161333 | C | 31.1052322 | 10.6197878 | 42.2308156 |
| C | 31.0976294 | 5.6589681 | 47.9198118 | C | 32.0577158 | 10.0081393 | 43.2696615 |
| C | 29.0113207 | 4.3802779 | 48.0059274 | O | 33.0694617 | 8.5476326  | 41.5171097 |
| C | 29.9702146 | 5.1555036 | 48.6558830 | C | 36.6874229 | 8.4446958  | 39.2187743 |
| O | 27.9402041 | 3.8983254 | 48.6954171 | C | 37.8381346 | 9.0292401  | 38.6499642 |
| H | 26.3600216 | 8.0005734 | 42.5761540 | C | 37.8827000 | 9.3439873  | 37.2897211 |
| H | 24.8533238 | 6.5168845 | 41.3631347 | C | 36.7846025 | 9.0861673  | 36.4595929 |
| H | 27.8700008 | 1.9714767 | 38.8864044 | C | 35.6363718 | 8.5094663  | 37.0185919 |
| H | 24.4788209 | 2.4221718 | 38.4532223 | C | 35.5807202 | 8.1934823  | 38.3776702 |
| H | 36.5050868 | 3.2057288 | 43.6867003 | N | 36.6261003 | 8.1577468  | 40.5799075 |
| H | 38.9377713 | 2.6148189 | 43.7620818 | H | 33.6483778 | 11.5448775 | 40.0185653 |
| H | 40.4223545 | 3.1935836 | 41.9079834 | H | 34.7956753 | 9.6813834  | 41.0351544 |
| H | 35.8778276 | 5.2518613 | 39.3693713 | H | 34.0522120 | 9.0285286  | 43.3349482 |
| H | 37.3269711 | 5.7997045 | 37.4840784 | H | 31.1575517 | 12.0544498 | 40.5851754 |
| H | 33.6378994 | 2.4875512 | 38.1510009 | H | 32.3366071 | 12.3585198 | 41.8705464 |
| H | 33.6499125 | 1.8896388 | 35.7151066 | H | 30.3038589 | 11.1750556 | 42.7505767 |
| H | 32.4936915 | 3.2876553 | 34.0879525 | H | 30.6159605 | 9.8099889  | 41.6593343 |
| H | 31.0196752 | 6.5265040 | 38.4158170 | H | 32.3882678 | 10.7853913 | 43.9871332 |
| H | 29.7310146 | 7.8649264 | 36.7884396 | H | 31.5527741 | 9.2228016  | 43.8608074 |
| H | 28.8187553 | 7.5172326 | 42.6823545 | H | 32.4876539 | 10.2745866 | 39.6153931 |

|                                    |            |           |            |   |            |           |            |
|------------------------------------|------------|-----------|------------|---|------------|-----------|------------|
| H                                  | 38.7091846 | 9.2271325 | 39.2842506 | O | 40.1215428 | 4.1371660 | 37.2671234 |
| H                                  | 38.7917328 | 9.7947951 | 36.8758916 | O | 35.1799989 | 5.7610189 | 41.0181755 |
| H                                  | 36.8207938 | 9.3374958 | 35.3954763 | O | 34.2600474 | 4.0404610 | 42.1130246 |
| H                                  | 34.7657961 | 8.2946484 | 36.3890669 | C | 35.2418209 | 4.6384093 | 41.5600283 |
| H                                  | 34.6800812 | 7.7281041 | 38.7908403 | C | 32.5493864 | 5.5941603 | 37.8905230 |
| H                                  | 35.9992583 | 7.3988386 | 40.8584210 | C | 33.1495498 | 4.3914909 | 37.5443325 |
| H                                  | 37.5256445 | 8.0914379 | 41.0497226 | C | 33.2180547 | 3.9875503 | 36.1975373 |
| H                                  | 24.4736222 | 4.4164735 | 39.9087844 | C | 32.6546319 | 4.7658683 | 35.2092889 |
| H                                  | 40.7988970 | 4.3606296 | 39.6074910 | C | 32.0005992 | 6.0066278 | 35.5010456 |
| H                                  | 31.1188872 | 5.4038683 | 33.5338128 | C | 31.9646370 | 6.4323109 | 36.8808878 |
| H                                  | 29.8719419 | 5.3236750 | 49.7283228 | C | 31.2978607 | 7.6542163 | 37.1892252 |
|                                    |            |           |            | C | 30.7076069 | 8.4060566 | 36.2060290 |
|                                    |            |           |            | C | 30.7407646 | 7.9979990 | 34.8460599 |
|                                    |            |           |            | C | 31.3805185 | 6.8172222 | 34.4819318 |
|                                    |            |           |            | O | 30.1142548 | 8.8735773 | 34.0053839 |
|                                    |            |           |            | O | 32.5983916 | 7.1068753 | 39.7548145 |
|                                    |            |           |            | O | 32.3921396 | 4.8937615 | 40.1141066 |
|                                    |            |           |            | C | 32.5034307 | 5.9034638 | 39.3633382 |
|                                    |            |           |            | C | 28.4018231 | 6.0392425 | 41.7034864 |
|                                    |            |           |            | C | 27.7321458 | 7.1648056 | 42.1587070 |
|                                    |            |           |            | C | 28.3320098 | 3.7878371 | 40.5913222 |
|                                    |            |           |            | O | 30.4506897 | 7.1800460 | 41.6096803 |
|                                    |            |           |            | O | 30.5190405 | 5.0091546 | 42.1450398 |
|                                    |            |           |            | C | 29.8964643 | 6.0614324 | 41.8247465 |
|                                    |            |           |            | C | 32.1488397 | 6.7945410 | 45.8249736 |
|                                    |            |           |            | C | 32.8067116 | 7.8210110 | 46.4783200 |
|                                    |            |           |            | C | 31.2324442 | 5.9439285 | 46.5340190 |
|                                    |            |           |            | C | 30.4683871 | 4.9310109 | 45.8850551 |
|                                    |            |           |            | C | 29.5687196 | 4.1614272 | 46.5831659 |
|                                    |            |           |            | O | 32.4532726 | 7.6398456 | 43.6345994 |
|                                    |            |           |            | O | 32.6003482 | 5.4182554 | 43.9591435 |
|                                    |            |           |            | C | 32.4154846 | 6.6018184 | 44.3587346 |
|                                    |            |           |            | C | 32.6330544 | 8.0068695 | 47.8672934 |
| <i>(R,R)</i> -1-TS1 (QM(B3LYP)/MM) |            |           |            |   |            |           |            |
| C                                  | 26.3291175 | 7.2408806 | 42.0701901 |   |            |           |            |
| C                                  | 25.6133484 | 6.2192658 | 41.4841841 |   |            |           |            |
| C                                  | 26.2502314 | 5.0463039 | 40.9626362 |   |            |           |            |
| C                                  | 27.6829911 | 4.9491476 | 41.1046674 |   |            |           |            |
| C                                  | 27.6179297 | 2.7913291 | 39.9759151 |   |            |           |            |
| C                                  | 26.2093443 | 2.8843286 | 39.8187853 |   |            |           |            |
| C                                  | 25.5221534 | 3.9913722 | 40.3030215 |   |            |           |            |
| O                                  | 25.6606287 | 1.8104323 | 39.1768635 |   |            |           |            |
| Cu                                 | 32.3194963 | 7.7277947 | 41.6431447 |   |            |           |            |
| Cu                                 | 32.5020919 | 4.8743076 | 42.0728546 |   |            |           |            |
| C                                  | 36.5834296 | 3.9485945 | 41.6421447 |   |            |           |            |
| C                                  | 37.0067399 | 3.4598755 | 42.8645966 |   |            |           |            |
| C                                  | 38.3383603 | 3.0092915 | 43.0263628 |   |            |           |            |
| C                                  | 39.2349428 | 3.0696262 | 41.9806506 |   |            |           |            |
| C                                  | 38.8399971 | 3.5359317 | 40.6844136 |   |            |           |            |
| C                                  | 37.4662072 | 3.9282859 | 40.5119881 |   |            |           |            |
| C                                  | 37.0197359 | 4.2678171 | 39.2039022 |   |            |           |            |
| C                                  | 37.8861406 | 4.2815053 | 38.1380437 |   |            |           |            |
| C                                  | 39.2692856 | 4.0210184 | 38.3241839 |   |            |           |            |
| C                                  | 39.7512455 | 3.6429562 | 39.5767762 |   |            |           |            |

|   |            |            |            |   |            |            |            |
|---|------------|------------|------------|---|------------|------------|------------|
| C | 31.7806651 | 7.1924606  | 48.5809179 | C | 35.6086742 | 11.3060058 | 42.0517288 |
| C | 31.0325775 | 6.1463182  | 47.9475323 | C | 35.6273388 | 9.9520470  | 42.7747992 |
| C | 29.3809838 | 4.3386246  | 47.9786624 | O | 33.6387970 | 9.1412253  | 41.5862334 |
| C | 30.1010386 | 5.3163335  | 48.6614185 | C | 37.8745485 | 7.9346931  | 39.0773440 |
| O | 28.4905701 | 3.5529749  | 48.6466815 | C | 39.1980471 | 8.4071298  | 39.1231829 |
| H | 25.8062175 | 8.1220961  | 42.4551833 | C | 39.9276865 | 8.5934048  | 37.9464526 |
| H | 24.5263134 | 6.3313954  | 41.4184691 | C | 39.3461038 | 8.3243246  | 36.7026255 |
| H | 28.1154126 | 1.9032813  | 39.5763428 | C | 38.0226273 | 7.8691162  | 36.6510629 |
| H | 24.7047926 | 1.9067334  | 39.0425350 | C | 37.2894055 | 7.6736398  | 37.8242205 |
| H | 36.3127891 | 3.4573971  | 43.7094392 | N | 37.1205380 | 7.7652330  | 40.2593070 |
| H | 38.6654653 | 2.6309104  | 44.0003209 | H | 35.9914374 | 9.9449440  | 38.8436023 |
| H | 40.2664777 | 2.7428188  | 42.1466117 | H | 34.7629936 | 8.0305078  | 39.9432526 |
| H | 35.9699299 | 4.5180812  | 39.0426619 | H | 35.0864250 | 7.8572849  | 42.4278749 |
| H | 37.5185051 | 4.5314300  | 37.1365970 | H | 36.2063780 | 12.1635687 | 40.1320642 |
| H | 33.5540401 | 3.7557499  | 38.3342816 | H | 37.2712618 | 10.8787333 | 40.7242220 |
| H | 33.7036103 | 3.0416620  | 35.9367655 | H | 36.1663085 | 12.0554090 | 42.6417690 |
| H | 32.7092605 | 4.4005867  | 34.1788354 | H | 34.5652152 | 11.6630517 | 41.9802726 |
| H | 31.2567171 | 7.9880286  | 38.2249251 | H | 36.6729242 | 9.6502174  | 42.9884810 |
| H | 30.1870867 | 9.3382490  | 36.4425183 | H | 35.1067145 | 10.0132384 | 43.7472464 |
| H | 28.3049008 | 7.9894140  | 42.5886915 | H | 34.4699291 | 10.5632993 | 39.4781863 |
| H | 29.4132785 | 3.6947942  | 40.6867559 | H | 39.6665102 | 8.6078499  | 40.0929866 |
| H | 33.4727813 | 8.4758246  | 45.9106974 | H | 40.9637022 | 8.9413792  | 38.0049416 |
| H | 30.5871880 | 4.7634651  | 44.8152611 | H | 39.9200241 | 8.4706288  | 35.7825424 |
| H | 28.9865418 | 3.3957268  | 46.0562342 | H | 37.5499520 | 7.6626605  | 35.6847697 |
| H | 30.0827509 | 8.5556619  | 33.0898716 | H | 36.2585256 | 7.3098077  | 37.7741577 |
| H | 39.6578510 | 4.5501064  | 36.5204783 | H | 36.5896943 | 6.8789145  | 40.3499240 |
| H | 33.1788504 | 8.8048965  | 48.3807084 | H | 37.6757907 | 7.9024264  | 41.1044473 |
| H | 31.6712276 | 7.3656486  | 49.6560944 | H | 24.4450526 | 4.0898909  | 40.1680602 |
| H | 28.0817135 | 2.9268044  | 48.0268867 | H | 40.8268188 | 3.5236211  | 39.7070367 |
| C | 34.9675609 | 8.8467202  | 41.9561628 | H | 31.4155089 | 6.4984617  | 33.4401862 |
| C | 35.1854959 | 8.8675149  | 40.4954946 | H | 29.9573342 | 5.4244233  | 49.7364683 |
| C | 35.4531011 | 10.1598853 | 39.7839171 |   |            |            |            |
| C | 36.2096971 | 11.1846098 | 40.6435047 |   |            |            |            |

(*R,R*)-1-Int1 (QM(B3LYP)/MM)

|    |            |           |            |   |            |           |            |
|----|------------|-----------|------------|---|------------|-----------|------------|
| C  | 26.2686907 | 7.3881558 | 42.3894496 | C | 31.6610312 | 6.8675141 | 34.5635496 |
| C  | 25.5865155 | 6.3679348 | 41.7618713 | O | 30.6229364 | 9.0125444 | 33.9587314 |
| C  | 26.2651536 | 5.2491192 | 41.1775743 | O | 32.5502060 | 7.1732140 | 39.9005494 |
| C  | 27.7014043 | 5.2039237 | 41.3073248 | O | 32.2801009 | 4.9762702 | 40.2978282 |
| C  | 27.7195170 | 3.1027730 | 40.0748641 | C | 32.4264136 | 5.9727024 | 39.5297875 |
| C  | 26.3084982 | 3.1496297 | 39.9215874 | C | 28.3834585 | 6.2944488 | 41.9451664 |
| C  | 25.5785952 | 4.2020407 | 40.4624752 | C | 27.6756098 | 7.3689113 | 42.4578193 |
| O  | 25.8008385 | 2.0921160 | 39.2192241 | C | 28.3951089 | 4.0970248 | 40.7355472 |
| Cu | 32.2938230 | 8.0115091 | 41.7919523 | O | 30.4026423 | 7.4878576 | 41.7765262 |
| Cu | 32.4914356 | 5.0904731 | 42.2327453 | O | 30.5245141 | 5.3352826 | 42.3867040 |
| C  | 36.5571463 | 3.9998736 | 41.6946669 | C | 29.8807195 | 6.3700975 | 42.0379709 |
| C  | 36.9793527 | 3.5936504 | 42.9471757 | C | 32.1609094 | 6.8936799 | 45.9812533 |
| C  | 38.3144204 | 3.1650503 | 43.1400102 | C | 32.8068127 | 7.8959217 | 46.6809966 |
| C  | 39.2190615 | 3.1846140 | 42.0990582 | C | 31.2224777 | 6.0279788 | 46.6403506 |
| C  | 38.8294561 | 3.5807162 | 40.7777399 | C | 30.4703179 | 5.0411655 | 45.9391493 |
| C  | 37.4471044 | 3.9227920 | 40.5723907 | C | 29.5488819 | 4.2537582 | 46.5873707 |
| C  | 36.9996197 | 4.1571068 | 39.2422532 | O | 32.4484263 | 7.7829857 | 43.8049524 |
| C  | 37.8781161 | 4.1567041 | 38.1871091 | O | 32.7065951 | 5.5688340 | 44.1073464 |
| C  | 39.2683549 | 3.9773925 | 38.4033659 | C | 32.4563769 | 6.7439673 | 44.5144192 |
| C  | 39.7505113 | 3.6684429 | 39.6762218 | C | 32.5996007 | 8.0385688 | 48.0708320 |
| O  | 40.1271607 | 4.1065418 | 37.3521549 | C | 31.7261919 | 7.2065866 | 48.7374979 |
| O  | 35.1293508 | 5.7093868 | 40.8569716 | C | 30.9875474 | 6.1864400 | 48.0528013 |
| O  | 34.2493511 | 4.1841737 | 42.2229166 | C | 29.3267680 | 4.3872318 | 47.9824702 |
| C  | 35.2128151 | 4.6704248 | 41.5627800 | C | 30.0314490 | 5.3400507 | 48.7132763 |
| C  | 32.4962323 | 5.6232482 | 38.0617792 | O | 28.4168954 | 3.5828312 | 48.6022039 |
| C  | 33.0170354 | 4.3703524 | 37.7680595 | H | 25.7155797 | 8.2272490 | 42.8228825 |
| C  | 33.1421858 | 3.9373088 | 36.4344397 | H | 24.4948127 | 6.4370650 | 41.7154052 |
| C  | 32.7204500 | 4.7432682 | 35.3993555 | H | 28.2498904 | 2.2573979 | 39.6281510 |
| C  | 32.1457995 | 6.0337444 | 35.6330237 | H | 24.8415214 | 2.1592941 | 39.0927089 |
| C  | 32.0479396 | 6.4859500 | 37.0025956 | H | 36.2806273 | 3.6426244 | 43.7866538 |
| C  | 31.4586392 | 7.7627435 | 37.2443596 | H | 38.6384310 | 2.8432978 | 44.1350336 |
| C  | 31.0133477 | 8.5454733 | 36.2090463 | H | 40.2545331 | 2.8840003 | 42.2889636 |
| C  | 31.1117231 | 8.1101908 | 34.8603716 | H | 35.9411929 | 4.3402448 | 39.0538959 |





|   |            |           |            |   |            |           |            |
|---|------------|-----------|------------|---|------------|-----------|------------|
| C | 39.2723852 | 3.3348363 | 41.8217267 | C | 31.2140003 | 5.4222819 | 46.4780902 |
| C | 38.8120673 | 4.2078732 | 40.7830202 | C | 30.2200094 | 4.5774942 | 45.9056572 |
| C | 37.4091147 | 4.5432713 | 40.7619875 | C | 29.1700282 | 4.1054223 | 46.6560884 |
| C | 36.9337317 | 5.3762584 | 39.7090352 | O | 32.8030510 | 6.5252491 | 43.4693307 |
| C | 37.7850935 | 5.8549951 | 38.7416526 | O | 32.3898780 | 4.3698728 | 43.9626100 |
| C | 39.1721075 | 5.5571777 | 38.7732949 | C | 32.5124690 | 5.5911392 | 44.2742717 |
| C | 39.6893050 | 4.7436281 | 39.7792338 | C | 33.0819151 | 7.1906222 | 47.6535455 |
| O | 39.9960908 | 6.0698532 | 37.8174441 | C | 32.0629254 | 6.6692332 | 48.4211502 |
| O | 34.7279259 | 5.5242942 | 41.6051620 | C | 31.0849115 | 5.7789669 | 47.8693977 |
| O | 34.2902928 | 3.3805314 | 42.1204138 | C | 29.0552985 | 4.4213189 | 48.0349512 |
| C | 35.0777569 | 4.3298619 | 41.8289198 | C | 29.9978987 | 5.2475324 | 48.6439559 |
| C | 32.3505648 | 3.9015664 | 37.8777601 | O | 28.0201756 | 3.9150727 | 48.7606750 |
| C | 32.9814864 | 2.7471691 | 37.4452761 | H | 26.2272588 | 7.7876945 | 42.8872984 |
| C | 33.0195962 | 2.4374907 | 36.0692457 | H | 24.7642731 | 6.4344859 | 41.4841211 |
| C | 32.4171840 | 3.2679673 | 35.1478956 | H | 27.8844635 | 2.1979318 | 38.6116472 |
| C | 31.7135124 | 4.4525274 | 35.5421483 | H | 24.4954540 | 2.6401241 | 38.1716061 |
| C | 31.6741995 | 4.7613745 | 36.9483928 | H | 36.3515535 | 2.7080802 | 43.4680995 |
| C | 30.9187696 | 5.8947433 | 37.3687879 | H | 38.7919934 | 2.1395763 | 43.5357235 |
| C | 30.2644643 | 6.6881613 | 36.4618610 | H | 40.3314768 | 3.0632712 | 41.8727847 |
| C | 30.3370896 | 6.4204445 | 35.0697005 | H | 35.8768915 | 5.6382283 | 39.6682808 |
| C | 31.0528015 | 5.3223721 | 34.6034212 | H | 37.3934624 | 6.4900675 | 37.9380463 |
| O | 29.6647609 | 7.3346826 | 34.3087925 | H | 33.4662459 | 2.0943851 | 38.1754520 |
| O | 32.6998857 | 5.4375531 | 39.6461978 | H | 33.5369543 | 1.5342782 | 35.7304073 |
| O | 32.2860192 | 3.2918818 | 40.1665228 | H | 32.4758357 | 2.9936314 | 34.0895279 |
| C | 32.4427248 | 4.2373469 | 39.3370823 | H | 30.8523761 | 6.1311350 | 38.4303318 |
| C | 28.5823292 | 5.6770780 | 41.6190113 | H | 29.6702785 | 7.5476251 | 36.7837930 |
| C | 28.0408450 | 6.7230146 | 42.3473306 | H | 28.6821039 | 7.3441588 | 42.9774132 |
| C | 28.2853636 | 3.7686318 | 40.0246982 | H | 29.3488590 | 3.5357149 | 40.0793724 |
| O | 30.8280614 | 6.4338611 | 41.4954627 | H | 34.0058872 | 7.2651674 | 45.6803184 |
| O | 30.4513610 | 4.2774300 | 42.0037107 | H | 30.2851963 | 4.2995421 | 44.8542199 |
| C | 30.0617374 | 5.4438105 | 41.7106629 | H | 28.4118211 | 3.4659098 | 46.1881144 |
| C | 32.3046637 | 5.9619665 | 45.7137049 | H | 29.6653574 | 7.1118208 | 33.3648370 |
| C | 33.1996773 | 6.8473374 | 46.2885843 | H | 39.4825020 | 6.6207805 | 37.2047124 |



|   |            |           |            |   |            |            |            |
|---|------------|-----------|------------|---|------------|------------|------------|
| C | 32.7684400 | 3.1297090 | 36.1152490 | H | 24.5216020 | 5.8848570  | 42.0571710 |
| C | 32.3206640 | 4.0303000 | 35.1731700 | H | 28.1419470 | 2.5315290  | 38.6472790 |
| C | 31.8412470 | 5.3301590 | 35.5374360 | H | 24.7422750 | 2.7142810  | 38.1281010 |
| C | 31.8719790 | 5.6830150 | 36.9351270 | H | 36.3031820 | 2.2523710  | 43.0483220 |
| C | 31.3696240 | 6.9606500 | 37.3155990 | H | 38.7016150 | 1.5123730  | 43.0226590 |
| C | 30.8670650 | 7.8336620 | 36.3845430 | H | 40.2961290 | 2.5165550  | 41.4592270 |
| C | 30.8454950 | 7.5008280 | 35.0043280 | H | 35.9618790 | 5.4067280  | 39.4127560 |
| C | 31.3333630 | 6.2723260 | 34.5727290 | H | 37.5149500 | 6.3105160  | 37.7538850 |
| O | 30.3315870 | 8.4912810 | 34.2148010 | H | 33.1117570 | 2.7532700  | 38.2317170 |
| O | 32.8318730 | 6.1662630 | 39.7479320 | H | 33.1188110 | 2.1413180  | 35.8013580 |
| O | 32.2242540 | 4.0354280 | 40.1299720 | H | 32.3280480 | 3.7219900  | 34.1227180 |
| C | 32.4686400 | 5.0120800 | 39.3655770 | H | 31.3879250 | 7.2415020  | 38.3673340 |
| C | 28.3826290 | 5.3909300 | 42.3114110 | H | 30.4705570 | 8.8099680  | 36.6771520 |
| C | 27.6963910 | 6.1899280 | 43.2130020 | H | 28.2449520 | 6.7053420  | 44.0050840 |
| C | 28.3357720 | 3.8343840 | 40.3461150 | H | 29.4144100 | 3.6989870  | 40.4166220 |
| O | 30.4718630 | 6.4687510 | 42.6374610 | H | 34.3767310 | 7.5775210  | 45.7637450 |
| O | 30.4839940 | 4.2593320 | 42.2893890 | H | 30.8267630 | 4.4303640  | 44.8274190 |
| C | 29.8903250 | 5.3868100 | 42.4201390 | H | 28.9485740 | 3.5227120  | 46.0901990 |
| C | 32.7309320 | 6.2101450 | 45.7318220 | H | 30.2605550 | 8.2262920  | 33.2844890 |
| C | 33.5719720 | 7.1225340 | 46.3461770 | H | 39.6320500 | 6.4858770  | 37.1019660 |
| C | 31.6419100 | 5.6155520 | 46.4642570 | H | 34.0884370 | 8.1526660  | 48.1886740 |
| C | 30.7066800 | 4.7200510 | 45.8679050 | H | 32.2755260 | 7.1570920  | 49.4962150 |
| C | 29.6550890 | 4.2010110 | 46.5836760 | H | 27.9367180 | 3.3757860  | 48.0629790 |
| O | 33.4172530 | 6.8115980 | 43.5437180 | C | 31.7533760 | 8.9075260  | 41.0070370 |
| O | 32.7788570 | 4.6864610 | 43.9265960 | C | 31.8115830 | 9.2876480  | 42.4306640 |
| C | 32.9920750 | 5.8765040 | 44.2874700 | C | 32.2682900 | 10.6531240 | 42.8464040 |
| C | 33.4020650 | 7.4472010 | 47.7096690 | C | 31.9589050 | 11.7458480 | 41.8115790 |
| C | 32.3789290 | 6.8832190 | 48.4413710 | C | 32.3365840 | 11.3076260 | 40.3892820 |
| C | 31.4520990 | 5.9621810 | 47.8524720 | C | 31.5816980 | 10.0321370 | 39.9904460 |
| C | 29.4752550 | 4.5184600 | 47.9537340 | O | 33.1028910 | 8.5617550  | 41.2405030 |
| C | 30.3603350 | 5.3868450 | 48.5895480 | C | 29.3647850 | 9.7769490  | 44.3046000 |
| O | 28.4366800 | 3.9716140 | 48.6447030 | C | 28.6939140 | 11.0052270 | 44.4457230 |
| H | 25.7682200 | 6.9729460 | 43.8345840 | C | 28.4927680 | 11.5599660 | 45.7124870 |



|   |            |           |            |   |            |            |            |
|---|------------|-----------|------------|---|------------|------------|------------|
| C | 27.6580292 | 6.2941954 | 43.1810979 | H | 28.1912351 | 6.7932109  | 43.9939249 |
| C | 28.3523236 | 3.9546977 | 40.3109780 | H | 29.4290557 | 3.8134741  | 40.4002901 |
| O | 30.4350309 | 6.5098063 | 42.8403574 | H | 34.3751358 | 7.6569002  | 45.7780109 |
| O | 30.4694893 | 4.3523278 | 42.2949479 | H | 30.8101330 | 4.5327586  | 44.8591189 |
| C | 29.8594141 | 5.4477397 | 42.4825951 | H | 28.8873562 | 3.6866431  | 46.1052513 |
| C | 32.7146438 | 6.3082350 | 45.7501827 | H | 30.1124315 | 7.7804575  | 33.3064317 |
| C | 33.5593392 | 7.2206328 | 46.3597494 | H | 39.6259571 | 5.9946980  | 36.9453490 |
| C | 31.6129506 | 5.7380722 | 46.4826007 | H | 34.0715294 | 8.2707281  | 48.1930181 |
| C | 30.6723085 | 4.8456313 | 45.8898373 | H | 32.2370053 | 7.3123223  | 49.4997755 |
| C | 29.5993565 | 4.3605573 | 46.5969025 | H | 27.8496086 | 3.5875372  | 48.0640260 |
| O | 33.4322816 | 6.8552908 | 43.5535284 | C | 31.8642986 | 8.8289833  | 41.1518526 |
| O | 32.7590790 | 4.7492373 | 43.9803234 | C | 31.5144691 | 9.3454043  | 42.5809729 |
| C | 32.9880559 | 5.9487635 | 44.3097662 | C | 31.9434817 | 10.7941492 | 42.8186257 |
| C | 33.3807427 | 7.5668763 | 47.7176000 | C | 31.5448770 | 11.7636383 | 41.6966375 |
| C | 32.3460155 | 7.0237982 | 48.4492507 | C | 32.0429580 | 11.2555181 | 40.3367681 |
| C | 31.4140816 | 6.1058337 | 47.8635471 | C | 31.4914317 | 9.8550449  | 40.0555615 |
| C | 29.4079036 | 4.7021592 | 47.9594700 | O | 33.2051558 | 8.5242090  | 41.1225373 |
| C | 30.3069655 | 5.5544503 | 48.5967509 | C | 29.4463091 | 9.5811466  | 44.0777736 |
| O | 28.3452249 | 4.1906986 | 48.6419079 | C | 28.3487466 | 10.4434082 | 44.0204676 |
| H | 25.7224385 | 7.0958773 | 43.7543223 | C | 27.7867579 | 10.9258835 | 45.2073698 |
| H | 24.5102524 | 6.0107312 | 41.9512529 | C | 28.3284897 | 10.5539729 | 46.4415764 |
| H | 28.1871649 | 2.6748089 | 38.5932188 | C | 29.4298718 | 9.6909788  | 46.4865714 |
| H | 24.7957366 | 2.8460051 | 38.0259418 | C | 29.9909298 | 9.1936521  | 45.3064573 |
| H | 36.3534567 | 2.3598542 | 43.2995829 | N | 30.0277393 | 9.0675185  | 42.8379540 |
| H | 38.7458435 | 1.5979809 | 43.3132149 | H | 31.5919813 | 11.1501417 | 43.8030743 |
| H | 40.3298939 | 2.4386274 | 41.6440277 | H | 32.0347209 | 8.6804296  | 43.2824229 |
| H | 35.9822814 | 5.1390459 | 39.3818784 | H | 31.2465037 | 7.9241427  | 40.9617191 |
| H | 37.5157480 | 5.8673054 | 37.6193472 | H | 31.9539457 | 12.7664492 | 41.9167612 |
| H | 33.2645968 | 2.5910682 | 38.3711615 | H | 30.4416210 | 11.8863707 | 41.6659959 |
| H | 33.3445647 | 1.9415268 | 35.9511354 | H | 31.7523635 | 11.9540515 | 39.5306901 |
| H | 32.4727259 | 3.4408519 | 34.2351756 | H | 33.1473908 | 11.2097483 | 40.3439937 |
| H | 31.3233411 | 6.9885089 | 38.4052529 | H | 30.3842661 | 9.9097436  | 39.9582322 |
| H | 30.3189404 | 8.4659416 | 36.6808123 | H | 31.8680129 | 9.4591676  | 39.0972260 |

|                           |            |            |            |   |            |           |            |
|---------------------------|------------|------------|------------|---|------------|-----------|------------|
| H                         | 33.0458693 | 10.7561678 | 42.8751747 | C | 39.7047934 | 4.6134721 | 39.7423465 |
| H                         | 27.9265525 | 10.7365709 | 43.0531241 | O | 39.9848944 | 5.9589711 | 37.7901049 |
| H                         | 26.9236649 | 11.5970115 | 45.1617304 | O | 34.8548708 | 5.4672854 | 41.7308999 |
| H                         | 27.8940902 | 10.9355249 | 47.3705933 | O | 34.3135777 | 3.3283147 | 42.1497576 |
| H                         | 29.8627296 | 9.4010174  | 47.4487059 | C | 35.1462370 | 4.2413078 | 41.8875070 |
| H                         | 30.8440702 | 8.5114965  | 45.3471100 | C | 32.5414350 | 3.9752821 | 37.8672324 |
| H                         | 29.9911048 | 7.9643200  | 42.8201800 | C | 33.1642069 | 2.8188146 | 37.4302818 |
| H                         | 29.4739016 | 9.4065739  | 42.0427828 | C | 33.1598520 | 2.4939763 | 36.0573377 |
| H                         | 24.4649996 | 4.3994461  | 39.9328040 | C | 32.5166307 | 3.3071483 | 35.1477652 |
| H                         | 40.8439548 | 4.0135787  | 39.6280020 | C | 31.8153926 | 4.4900857 | 35.5515106 |
| H                         | 31.3568987 | 5.6670621  | 33.5763684 | C | 31.8307793 | 4.8208405 | 36.9529649 |
| H                         | 30.1892848 | 5.7236891  | 49.6670668 | C | 31.0864985 | 5.9551226 | 37.3899297 |
|                           |            |            |            | C | 30.3702288 | 6.7160172 | 36.5020262 |
|                           |            |            |            | C | 30.3750371 | 6.4190022 | 35.1136338 |
| (S,S)-1-RC (QM(B3LYP)/MM) |            |            |            | C | 31.1002744 | 5.3348626 | 34.6292102 |
| C                         | 26.9000866 | 7.3549740  | 41.7288054 | O | 29.6397221 | 7.2987406 | 34.3705079 |
| C                         | 26.0148986 | 6.4677343  | 41.1529237 | O | 32.9999010 | 5.4890891 | 39.6338179 |
| C                         | 26.4433174 | 5.2134307  | 40.6094267 | O | 32.3812116 | 3.3885779 | 40.1494397 |
| C                         | 27.8435034 | 4.8875746  | 40.7165243 | C | 32.6416986 | 4.3136727 | 39.3243227 |
| C                         | 27.4267292 | 2.8055561  | 39.5242178 | C | 28.7348537 | 5.8219961 | 41.3439231 |
| C                         | 26.0421774 | 3.1062993  | 39.4336754 | C | 28.2721528 | 7.0412109 | 41.8122351 |
| C                         | 25.5434645 | 4.2894367  | 39.9697946 | C | 28.2973046 | 3.6606422 | 40.1490831 |
| O                         | 25.3190256 | 2.1366678  | 38.7978671 | O | 31.0119567 | 6.4604164 | 41.3175624 |
| Cu                        | 32.9945222 | 6.2194662  | 41.5076267 | O | 30.5070123 | 4.3589361 | 41.9330614 |
| Cu                        | 32.3906794 | 3.7803110  | 42.0909761 | C | 30.1906255 | 5.5221392 | 41.5378555 |
| C                         | 36.5905004 | 3.8517761  | 41.7752895 | C | 32.2378677 | 5.9965959 | 45.6979380 |
| C                         | 37.0956489 | 2.9749478  | 42.7183450 | C | 33.0738147 | 6.9495383 | 46.2552667 |
| C                         | 38.4676757 | 2.6413723  | 42.7163031 | C | 31.1753773 | 5.4146377 | 46.4716187 |
| C                         | 39.3164168 | 3.1749407  | 41.7716009 | C | 30.2238710 | 4.5125666 | 45.9146997 |
| C                         | 38.8414770 | 4.0585106  | 40.7479996 | C | 29.2023010 | 3.9969581 | 46.6759991 |
| C                         | 37.4377695 | 4.3861596  | 40.7449466 | O | 32.8238542 | 6.5234061 | 43.4690646 |
| C                         | 36.9396749 | 5.1994886  | 39.6863602 | O | 32.3738037 | 4.3773634 | 43.9666272 |
| C                         | 37.7766145 | 5.6899165  | 38.7108561 | C | 32.4903233 | 5.6027071 | 44.2717018 |
| C                         | 39.1709682 | 5.4237433  | 38.7422247 |   |            |           |            |

|   |            |           |            |   |            |            |            |
|---|------------|-----------|------------|---|------------|------------|------------|
| C | 32.9340219 | 7.3148224 | 47.6117096 | C | 31.9440223 | 9.6124583  | 39.0720811 |
| C | 31.9518659 | 6.7444886 | 48.3916109 | C | 32.1409402 | 10.8508598 | 39.9562673 |
| C | 31.0284117 | 5.7877836 | 47.8571843 | C | 32.9095319 | 10.5306701 | 41.2531864 |
| C | 29.0773847 | 4.3230535 | 48.0516157 | O | 33.7359968 | 8.1849599  | 40.9089586 |
| C | 29.9758474 | 5.2076067 | 48.6443363 | C | 37.5055461 | 7.4581681  | 43.6285141 |
| O | 28.0748952 | 3.7703694 | 48.7898057 | C | 38.8018945 | 7.9222410  | 43.9325781 |
| H | 26.5359407 | 8.3079533 | 42.1257049 | C | 39.3508347 | 7.7293985  | 45.2019905 |
| H | 24.9577539 | 6.7493161 | 41.1091182 | C | 38.6268680 | 7.0742308  | 46.2048627 |
| H | 27.7749163 | 1.8704690 | 39.0776748 | C | 37.3366517 | 6.6147418  | 45.9118749 |
| H | 24.3805394 | 2.3653899 | 38.7092395 | C | 36.7801889 | 6.8006718  | 44.6455871 |
| H | 36.4265734 | 2.5632576 | 43.4779539 | N | 36.9356559 | 7.6724994  | 42.3760948 |
| H | 38.8605481 | 1.9625037 | 43.4795157 | H | 33.1616904 | 8.0766759  | 38.1000372 |
| H | 40.3763672 | 2.9045377 | 41.8063917 | H | 35.2765907 | 8.5311608  | 39.4968906 |
| H | 35.8754457 | 5.4322143 | 39.6366123 | H | 34.9600319 | 9.7160365  | 41.6831346 |
| H | 37.3666953 | 6.2998514 | 37.8963616 | H | 31.3886056 | 8.8367014  | 39.6305104 |
| H | 33.6688119 | 2.1723359 | 38.1530097 | H | 31.3346773 | 9.8654121  | 38.1861816 |
| H | 33.6695570 | 1.5884945 | 35.7128175 | H | 32.7005908 | 11.6141093 | 39.3794657 |
| H | 32.5353489 | 3.0162200 | 34.0924091 | H | 31.1661090 | 11.3051152 | 40.2086972 |
| H | 31.0708427 | 6.2162756 | 38.4483379 | H | 32.2331864 | 10.0724128 | 41.9989935 |
| H | 29.7773747 | 7.5708856 | 36.8378898 | H | 33.2898593 | 11.4618776 | 41.7102868 |
| H | 28.9770321 | 7.7432705 | 42.2642288 | H | 33.7700365 | 9.7344387  | 37.8828190 |
| H | 29.3527947 | 3.3974554 | 40.2080587 | H | 39.3768721 | 8.4418837  | 43.1577752 |
| H | 33.8544574 | 7.4038631 | 45.6409370 | H | 40.3621925 | 8.0964014  | 45.4097253 |
| H | 30.2976151 | 4.2308130 | 44.8649609 | H | 39.0608981 | 6.9237815  | 47.1981941 |
| H | 28.4751862 | 3.3142895 | 46.2195592 | H | 36.7503036 | 6.0974435  | 46.6794842 |
| H | 29.5461031 | 7.0198913 | 33.4464239 | H | 35.7736021 | 6.4338267  | 44.4231275 |
| H | 39.4614166 | 6.4995163 | 37.1765572 | H | 37.6014559 | 7.8038896  | 41.6186584 |
| H | 33.6148187 | 8.0543851 | 48.0447443 | H | 36.1855014 | 7.0261361  | 42.1196710 |
| H | 31.8744705 | 7.0468985 | 49.4408440 | H | 24.4769018 | 4.5087493  | 39.9206784 |
| H | 27.5573719 | 3.1647717 | 48.2345430 | H | 40.7834235 | 4.4589459  | 39.7696478 |
| C | 34.0758906 | 9.5783587 | 41.0458472 | H | 31.1670513 | 5.1473524  | 33.5575539 |
| C | 34.2604245 | 8.8591446 | 39.7620949 | H | 29.8956168 | 5.3985661  | 49.7144596 |
| C | 33.2969728 | 9.0466896 | 38.6116994 |   |            |            |            |



|                            |           |            |              |            |            |
|----------------------------|-----------|------------|--------------|------------|------------|
| (S,S)-1-TS1 (QM(B3LYP)/MM) | C         | 30.5957133 | 7.4079780    | 34.9954753 |            |
| C 26.5537114               | 7.0780462 | 41.9998745 | C 31.3021626 | 6.2879138  | 34.5687792 |
| C 25.7653874               | 6.1035676 | 41.4267129 | O 29.8826662 | 8.2664166  | 34.2071169 |
| C 26.3185816               | 4.8918699 | 40.8991188 | O 32.8324908 | 6.5600834  | 39.7327654 |
| C 27.7437664               | 4.7013488 | 41.0217361 | O 32.6234332 | 4.3524607  | 40.1219319 |
| C 27.5231030               | 2.5533372 | 39.8938529 | C 32.7076695 | 5.3550350  | 39.3574086 |
| C 26.1212294               | 2.7362646 | 39.7603472 | C 28.5391485 | 5.7408657  | 41.6137080 |
| C 25.5144097               | 3.8855249 | 40.2540175 | C 27.9493991 | 6.9088865  | 42.0736279 |
| O 25.4945582               | 1.6988634 | 39.1296425 | C 28.3087614 | 3.5009541  | 40.4990657 |
| Cu 32.5533625              | 7.2404022 | 41.5824697 | O 30.6607142 | 6.7477838  | 41.5725713 |
| Cu 32.5546585              | 4.3801704 | 42.0949331 | O 30.5839603 | 4.5588546  | 42.0162606 |
| C 36.6343927               | 3.6432668 | 41.8110193 | C 30.0317811 | 5.6614904  | 41.7369008 |
| C 37.1074313               | 2.7528608 | 42.7556989 | C 32.2542934 | 6.4939192  | 45.7787239 |
| C 38.4526632               | 2.3152009 | 42.7064221 | C 33.0172662 | 7.4628031  | 46.4054511 |
| C 39.3084794               | 2.7752442 | 41.7288190 | C 31.2540121 | 5.7651959  | 46.5093568 |
| C 38.8570513               | 3.6651655 | 40.6995633 | C 30.3905888 | 4.8161408  | 45.8891610 |
| C 37.4759320               | 4.0660250 | 40.7278878 | C 29.4162124 | 4.1648347  | 46.6066356 |
| C 36.9805982               | 4.8601187 | 39.6536979 | O 32.6691813 | 7.2431862  | 43.5728220 |
| C 37.8021680               | 5.2700763 | 38.6299678 | O 32.5420136 | 5.0245667  | 43.9545827 |
| C 39.1876319               | 4.9570695 | 38.6442685 | C 32.5025438 | 6.2333935  | 44.3187043 |
| C 39.7180335               | 4.1690898 | 39.6649432 | C 32.8628722 | 7.7074656  | 47.7875524 |
| O 39.9984231               | 5.4376238 | 37.6604429 | C 31.9283301 | 7.0095517  | 48.5212789 |
| O 35.1921612               | 5.5145240 | 41.9368697 | C 31.0767754 | 6.0282794  | 47.9159684 |
| O 34.2910598               | 3.4870443 | 42.1997013 | C 29.2497667 | 4.4001532  | 47.9962156 |
| C 35.2725534               | 4.2682796 | 41.9883266 | C 30.0672545 | 5.3180826  | 48.6518547 |
| C 32.6923894               | 5.0511831 | 37.8853876 | O 28.2867834 | 3.7270062  | 48.6856134 |
| C 33.3453543               | 3.8946800 | 37.4867699 | H 26.0950324 | 7.9929066  | 42.3882906 |
| C 33.3729152               | 3.5268213 | 36.1274311 | H 24.6866270 | 6.2833116  | 41.3757575 |
| C 32.7228799               | 4.2949757 | 35.1851541 | H 27.9564700 | 1.6356770  | 39.4867263 |
| C 32.0088773               | 5.4864829 | 35.5373172 | H 24.5435861 | 1.8523436  | 39.0153521 |
| C 32.0047737               | 5.8714227 | 36.9280008 | H 36.4431015 | 2.4158636  | 43.5564321 |
| C 31.2671369               | 7.0327874 | 37.3024035 | H 38.8222557 | 1.6197792  | 43.4670116 |
| C 30.5833225               | 7.7681324 | 36.3689503 | H 40.3501304 | 2.4391868  | 41.7360130 |

|   |            |            |            |                             |            |            |            |
|---|------------|------------|------------|-----------------------------|------------|------------|------------|
| H | 35.9251603 | 5.1354947  | 39.6305898 | H                           | 35.1357452 | 7.6736494  | 42.8520962 |
| H | 37.3905292 | 5.8586842  | 37.8010984 | H                           | 34.5383227 | 11.2864544 | 40.8676087 |
| H | 33.8323618 | 3.2718783  | 38.2405527 | H                           | 36.0304097 | 11.7515987 | 40.0232322 |
| H | 33.9015490 | 2.6188584  | 35.8196088 | H                           | 37.4081024 | 10.6307557 | 41.7865773 |
| H | 32.7542181 | 3.9605596  | 34.1431961 | H                           | 36.3637026 | 11.8636174 | 42.5102880 |
| H | 31.2424756 | 7.3352455  | 38.3482863 | H                           | 34.7998899 | 10.1847177 | 43.3677648 |
| H | 30.0070513 | 8.6518193  | 36.6565022 | H                           | 36.4161819 | 9.6289414  | 43.7974312 |
| H | 28.5803723 | 7.6931305  | 42.4971547 | H                           | 36.6016799 | 9.3697573  | 39.6110374 |
| H | 29.3825639 | 3.3375917  | 40.5810664 | H                           | 39.4419665 | 9.1041052  | 42.8198077 |
| H | 33.7506204 | 8.0255146  | 45.8226055 | H                           | 40.6546701 | 9.2365220  | 44.9841156 |
| H | 30.4984206 | 4.5988392  | 44.8272196 | H                           | 40.0409574 | 7.7108420  | 46.8695535 |
| H | 28.7595951 | 3.4462968  | 46.1013748 | H                           | 38.1974234 | 6.0493804  | 46.5537057 |
| H | 29.8319198 | 7.9721163  | 33.2846753 | H                           | 36.9911283 | 5.9089340  | 44.3836235 |
| H | 39.4750947 | 5.9572779  | 37.0286828 | H                           | 37.9373342 | 7.7462451  | 41.4325047 |
| H | 33.4893684 | 8.4586283  | 48.2791476 | H                           | 36.8868743 | 6.5828225  | 42.0776392 |
| H | 31.8344104 | 7.2259676  | 49.5900988 | H                           | 24.4420191 | 4.0451205  | 40.1418830 |
| H | 27.8200862 | 3.1227613  | 48.0853281 | H                           | 40.7987847 | 4.0363741  | 39.7142361 |
| C | 35.4505450 | 8.5255390  | 42.2542060 | H                           | 31.3424064 | 6.0214830  | 33.5126251 |
| C | 35.0638109 | 8.4915323  | 40.8283785 | H                           | 29.9473510 | 5.4569862  | 49.7262827 |
| C | 35.5754081 | 9.6254188  | 39.9446665 |                             |            |            |            |
| C | 35.5809784 | 10.9776425 | 40.6711616 |                             |            |            |            |
| C | 36.3503003 | 10.8854535 | 41.9973650 | (S,S)-1-Int1 (QM(B3LYP)/MM) |            |            |            |
| C | 35.7526153 | 9.8255410  | 42.9361086 | C                           | 26.4548537 | 7.1382903  | 42.2566994 |
| O | 33.7763960 | 8.7276300  | 41.3465300 | C                           | 25.7037795 | 6.1840549  | 41.6045973 |
| C | 38.1371746 | 7.4946193  | 43.4585238 | C                           | 26.3034520 | 5.0444490  | 40.9762656 |
| C | 39.1693000 | 8.4326580  | 43.6415660 | C                           | 27.7352794 | 4.9026576  | 41.0843821 |
| C | 39.8498609 | 8.5044585  | 44.8599893 | C                           | 27.6022167 | 2.8465593  | 39.7852529 |
| C | 39.5079793 | 7.6520559  | 45.9157405 | C                           | 26.1950169 | 2.9877256  | 39.6561697 |
| C | 38.4748026 | 6.7244112  | 45.7376568 | C                           | 25.5410499 | 4.0655500  | 40.2425586 |
| C | 37.7912982 | 6.6416769  | 44.5223678 | O                           | 25.6123829 | 1.9858063  | 38.9314618 |
| N | 37.4074940 | 7.4564460  | 42.2540360 | Cu                          | 32.4592861 | 7.5098715  | 41.5445641 |
| H | 34.9446317 | 9.6621392  | 39.0386961 | Cu                          | 32.5432752 | 4.5252810  | 42.1558834 |
| H | 35.1629620 | 7.5108612  | 40.3363019 | C                           | 36.5764947 | 3.5240515  | 41.8352687 |
|   |            |            |            | C                           | 37.0302079 | 2.5795793  | 42.7357656 |

|   |            |           |            |   |            |           |            |
|---|------------|-----------|------------|---|------------|-----------|------------|
| C | 38.3749504 | 2.1409984 | 42.6864333 | C | 33.0760520 | 7.6147788 | 46.4284353 |
| C | 39.2508128 | 2.6555164 | 41.7549126 | C | 31.2586702 | 5.9784543 | 46.5267100 |
| C | 38.8203749 | 3.6003798 | 40.7661067 | C | 30.3658956 | 5.0605562 | 45.9012657 |
| C | 37.4381308 | 4.0015423 | 40.7886668 | C | 29.3548504 | 4.4568133 | 46.6093347 |
| C | 36.9641744 | 4.8447163 | 39.7420036 | O | 32.7499064 | 7.3572093 | 43.5764931 |
| C | 37.8073755 | 5.3073045 | 38.7581277 | O | 32.5819002 | 5.1522052 | 44.0119728 |
| C | 39.1915269 | 4.9907920 | 38.7821044 | C | 32.5527194 | 6.3759182 | 44.3425562 |
| C | 39.6995217 | 4.1491258 | 39.7713340 | C | 32.9142814 | 7.8760616 | 47.8072566 |
| O | 40.0226855 | 5.5158973 | 37.8407753 | C | 31.9526836 | 7.2124548 | 48.5380315 |
| O | 35.1501223 | 5.4102788 | 41.9954927 | C | 31.0762486 | 6.2552295 | 47.9304678 |
| O | 34.2226139 | 3.4188735 | 42.2730679 | C | 29.1847508 | 4.7029602 | 47.9967343 |
| C | 35.2212139 | 4.1483084 | 42.0403717 | C | 30.0360061 | 5.5837966 | 48.6606463 |
| C | 32.6136965 | 4.9586180 | 37.9570977 | O | 28.1873928 | 4.0724584 | 48.6775761 |
| C | 33.2859057 | 3.7988066 | 37.6017542 | H | 25.9609272 | 7.9973129 | 42.7221464 |
| C | 33.3279149 | 3.3813359 | 36.2568936 | H | 24.6186773 | 6.3245802 | 41.5695783 |
| C | 32.6674329 | 4.0998098 | 35.2834123 | H | 28.0726566 | 1.9837090 | 39.3060974 |
| C | 31.9256446 | 5.2859874 | 35.5911424 | H | 24.6585665 | 2.1178953 | 38.8154655 |
| C | 31.9160296 | 5.7283447 | 36.9653587 | H | 36.3510463 | 2.2040440 | 43.5060603 |
| C | 31.1651254 | 6.8960967 | 37.2903709 | H | 38.7281642 | 1.4016644 | 43.4123674 |
| C | 30.4530548 | 7.5693761 | 36.3314824 | H | 40.2916466 | 2.3167229 | 41.7638357 |
| C | 30.4537944 | 7.1398862 | 34.9783588 | H | 35.9074582 | 5.1128844 | 39.7004510 |
| C | 31.1952328 | 6.0272778 | 34.5935272 | H | 37.4108573 | 5.9339336 | 37.9502884 |
| O | 29.6985574 | 7.9324588 | 34.1592596 | H | 33.7753295 | 3.2102120 | 38.3808822 |
| O | 32.6889702 | 6.5316131 | 39.7620299 | H | 33.8747962 | 2.4721832 | 35.9867399 |
| O | 32.6068657 | 4.3296514 | 40.2142393 | H | 32.7081396 | 3.7294170 | 34.2536865 |
| C | 32.6260998 | 5.3207947 | 39.4200146 | H | 31.1545608 | 7.2517262 | 38.3193788 |
| C | 28.4909856 | 5.9251979 | 41.7508079 | H | 29.8631117 | 8.4551142 | 36.5828420 |
| C | 27.8574610 | 7.0249360 | 42.3079010 | H | 28.4595965 | 7.8007509 | 42.7857624 |
| C | 28.3486011 | 3.7716216 | 40.4693374 | H | 29.4282736 | 3.6446923 | 40.5423360 |
| O | 30.5667636 | 7.0212047 | 41.6893863 | H | 33.8291981 | 8.1552292 | 45.8493434 |
| O | 30.5835227 | 4.8159292 | 42.0770702 | H | 30.4793960 | 4.8315832 | 44.8421989 |
| C | 29.9903580 | 5.9096993 | 41.8378597 | H | 28.6732211 | 3.7655408 | 46.0992798 |
| C | 32.2917249 | 6.6639855 | 45.7997642 | H | 29.5971011 | 7.5587143 | 33.2703672 |

|   |            |            |            |                           |            |           |            |
|---|------------|------------|------------|---------------------------|------------|-----------|------------|
| H | 39.5135483 | 6.0563040  | 37.2146608 | H                         | 37.4971058 | 7.5390040 | 41.6505864 |
| H | 33.5561088 | 8.6145154  | 48.2985405 | H                         | 36.2944829 | 6.4112110 | 42.1457483 |
| H | 31.8530147 | 7.4413258  | 49.6038308 | H                         | 24.4665700 | 4.2034486 | 40.1219633 |
| H | 27.7000407 | 3.4890469  | 48.0731335 | H                         | 40.7783330 | 4.0017335 | 39.8214142 |
| C | 35.7134118 | 8.3687861  | 42.4339696 | H                         | 31.2612589 | 5.7394081 | 33.5443189 |
| C | 35.0474658 | 8.4089448  | 41.0226395 | H                         | 29.9274793 | 5.7074017 | 49.7381481 |
| C | 35.8277316 | 9.3147679  | 40.0410539 |                           |            |           |            |
| C | 36.1270599 | 10.7038747 | 40.6116265 |                           |            |           |            |
| C | 36.9175243 | 10.5835054 | 41.9216973 | (S,S)-2-RC (QM(B3LYP)/MM) |            |           |            |
| C | 36.1387473 | 9.7450516  | 42.9463408 | C                         | 27.0581687 | 7.1913249 | 41.6241301 |
| O | 33.7465716 | 8.8251883  | 41.1767168 | C                         | 26.1420135 | 6.2552485 | 41.1887208 |
| C | 37.5694552 | 7.1122913  | 43.6568638 | C                         | 26.5308395 | 4.9257424 | 40.8204879 |
| C | 38.8810536 | 7.5705245  | 43.7904297 | C                         | 27.9265879 | 4.5798429 | 40.9540359 |
| C | 39.5698153 | 7.3488234  | 44.9873820 | C                         | 27.4222627 | 2.3560958 | 40.0959010 |
| C | 38.9421440 | 6.6817164  | 46.0440010 | C                         | 26.0459745 | 2.6832870 | 39.9746265 |
| C | 37.6244164 | 6.2321332  | 45.9002525 | C                         | 25.5929804 | 3.9505047 | 40.3288170 |
| C | 36.9312672 | 6.4411806  | 44.7049021 | O                         | 25.2857884 | 1.6556916 | 39.4974428 |
| N | 36.8392376 | 7.3277262  | 42.4094420 | Cu                        | 33.1221293 | 6.0035982 | 41.6019400 |
| H | 35.2319097 | 9.3770807  | 39.1144040 | Cu                        | 32.5508261 | 3.5444242 | 42.0855400 |
| H | 35.0866335 | 7.3828427  | 40.6004335 | C                         | 36.7339717 | 3.7284814 | 41.7208151 |
| H | 34.9726564 | 7.9307232  | 43.1159225 | C                         | 37.2908843 | 2.8227803 | 42.6055674 |
| H | 35.1719394 | 11.2250984 | 40.8068800 | C                         | 38.6709466 | 2.5293885 | 42.5434433 |
| H | 36.6847791 | 11.3120445 | 39.8759073 | C                         | 39.4722559 | 3.1268674 | 41.5945342 |
| H | 37.9089652 | 10.1254893 | 41.7161211 | C                         | 38.9406787 | 4.0423372 | 40.6282611 |
| H | 37.1303187 | 11.5805702 | 42.3478059 | C                         | 37.5313988 | 4.3351491 | 40.6913361 |
| H | 35.1934991 | 10.2661878 | 43.1801536 | C                         | 36.9751545 | 5.1895955 | 39.6961076 |
| H | 36.6899079 | 9.6555775  | 43.9000603 | C                         | 37.7603377 | 5.7350163 | 38.7089763 |
| H | 36.7853851 | 8.8187741  | 39.7668770 | C                         | 39.1589021 | 5.4953911 | 38.6706109 |
| H | 39.3606448 | 8.1020501  | 42.9623071 | C                         | 39.7518962 | 4.6613317 | 39.6156153 |
| H | 40.6006625 | 7.7001884  | 45.0932693 | O                         | 39.9198275 | 6.0841080 | 37.7055126 |
| H | 39.4810949 | 6.5110266  | 46.9811111 | O                         | 34.9656742 | 5.2921765 | 41.8106213 |
| H | 37.1278632 | 5.7068705  | 46.7214985 | O                         | 34.4747928 | 3.1139611 | 42.0776046 |
| H | 35.9074081 | 6.0776033  | 44.5834977 | C                         | 35.2822272 | 4.0701911 | 41.8783939 |
|   |            |            |            | C                         | 32.6592228 | 3.9456196 | 37.8683391 |

|   |            |           |            |   |            |            |            |
|---|------------|-----------|------------|---|------------|------------|------------|
| C | 33.2330368 | 2.7817418 | 37.3868083 | H | 26.7243466 | 8.1995180  | 41.8890455 |
| C | 33.2270514 | 2.5146854 | 36.0016910 | H | 25.0905044 | 6.5538002  | 41.1260511 |
| C | 32.6239784 | 3.3894841 | 35.1226373 | H | 27.7342637 | 1.3529546  | 39.7932911 |
| C | 31.9722793 | 4.5851869 | 35.5696756 | H | 24.3561672 | 1.9016547  | 39.3678546 |
| C | 32.0003299 | 4.8629762 | 36.9830646 | H | 36.6572305 | 2.3525065  | 43.3618878 |
| C | 31.3173143 | 6.0199017 | 37.4592626 | H | 39.1074041 | 1.8241886  | 43.2579240 |
| C | 30.6328558 | 6.8414061 | 36.5995132 | H | 40.5380850 | 2.8784247  | 41.5776894 |
| C | 30.6063548 | 6.5798675 | 35.2034295 | H | 35.9087482 | 5.4133498  | 39.7062764 |
| C | 31.2874076 | 5.4872363 | 34.6767209 | H | 37.3053252 | 6.3775717  | 37.9453484 |
| O | 29.8784994 | 7.4999732 | 34.4990399 | H | 33.7014599 | 2.0839183  | 38.0855190 |
| O | 33.1305078 | 5.3660350 | 39.7040752 | H | 33.7018726 | 1.6040609  | 35.6227254 |
| O | 32.4828632 | 3.2538033 | 40.1234377 | H | 32.6360924 | 3.1383974  | 34.0571849 |
| C | 32.7583385 | 4.2119238 | 39.3412263 | H | 31.3287384 | 6.2506614  | 38.5246126 |
| C | 28.8539900 | 5.5715252 | 41.4290630 | H | 30.0890551 | 7.7171667  | 36.9655157 |
| C | 28.4223706 | 6.8541878 | 41.7323747 | H | 29.1500674 | 7.5932713  | 42.0739182 |
| C | 28.3313944 | 3.2682825 | 40.5658173 | H | 29.3803288 | 2.9889982  | 40.6404879 |
| O | 31.1247785 | 6.2367865 | 41.4067646 | H | 34.0453788 | 6.9410458  | 45.8169103 |
| O | 30.6551693 | 4.1297256 | 42.0187790 | H | 30.4748006 | 3.8369574  | 44.8725727 |
| C | 30.3161809 | 5.2868934 | 41.6262181 | H | 28.6242105 | 2.8838492  | 46.1626210 |
| C | 32.3983140 | 5.5709480 | 45.7953905 | H | 29.7882005 | 7.2707795  | 33.5608897 |
| C | 33.2456672 | 6.4812097 | 46.4029040 | H | 39.3590372 | 6.6469263  | 37.1473427 |
| C | 31.3198866 | 4.9712348 | 46.5318728 | H | 33.7776584 | 7.5015060  | 48.2463054 |
| C | 30.3782056 | 4.0893564 | 45.9280756 | H | 31.9823843 | 6.4943899  | 49.5651478 |
| C | 29.3405576 | 3.5542513 | 46.6529022 | H | 27.6459747 | 2.7013002  | 48.1444542 |
| O | 32.9131736 | 6.2200464 | 43.5824427 | C | 32.6911856 | 9.0677218  | 40.7361687 |
| O | 32.5777391 | 4.0353546 | 43.9946399 | C | 33.3087655 | 9.1605090  | 42.0766086 |
| C | 32.6446133 | 5.2498364 | 44.3489976 | C | 34.4199985 | 10.1482951 | 42.3537438 |
| C | 33.0891842 | 6.7961812 | 47.7701235 | C | 35.1222290 | 10.6218849 | 41.0708061 |
| C | 32.0763975 | 6.2238051 | 48.5088135 | C | 34.0997940 | 11.0778537 | 40.0200383 |
| C | 31.1475184 | 5.3016205 | 47.9255439 | C | 33.1544640 | 9.9421972  | 39.5840066 |
| C | 29.1813774 | 3.8488020 | 48.0325280 | O | 33.6537206 | 8.0834608  | 41.1849501 |
| C | 30.0675456 | 4.7143787 | 48.6709862 | C | 26.0019305 | 7.8234426  | 37.1159962 |
| O | 28.1541357 | 3.2873228 | 48.7287633 | C | 24.8052323 | 8.2019768  | 37.7671634 |



|   |            |           |            |   |            |            |            |
|---|------------|-----------|------------|---|------------|------------|------------|
| C | 28.7289579 | 5.8612805 | 41.5302017 | H | 29.8900124 | 7.9315599  | 36.8724647 |
| C | 28.2262134 | 7.0221463 | 42.0932531 | H | 28.9071796 | 7.7191669  | 42.5886545 |
| C | 28.3739136 | 3.7900864 | 40.1687100 | H | 29.4424917 | 3.5742052  | 40.1883914 |
| O | 30.9969182 | 6.5410871 | 41.4703408 | H | 34.0632293 | 7.2705389  | 45.7706547 |
| O | 30.5292943 | 4.4205335 | 42.0523201 | H | 30.3389655 | 4.3541239  | 44.8363599 |
| C | 30.1940834 | 5.5890868 | 41.6876184 | H | 28.4626224 | 3.4749842  | 46.1391730 |
| C | 32.3641707 | 5.9666906 | 45.7706337 | H | 29.7275094 | 7.4502690  | 33.4666939 |
| C | 33.2494502 | 6.8477024 | 46.3656443 | H | 39.2222144 | 6.4517485  | 37.1250579 |
| C | 31.2611033 | 5.4197663 | 46.5056217 | H | 33.8264797 | 7.8568153  | 48.2025261 |
| C | 30.2709372 | 4.5948683 | 45.8975724 | H | 32.0074503 | 6.9082421  | 49.5358063 |
| C | 29.2179913 | 4.1010327 | 46.6289413 | H | 27.5173688 | 3.2887203  | 48.1459258 |
| O | 32.9018185 | 6.5500628 | 43.5536540 | C | 33.5654264 | 9.3652166  | 42.5849870 |
| O | 32.4657678 | 4.3908008 | 44.0094388 | C | 33.9103507 | 9.7831522  | 41.2058053 |
| C | 32.5923551 | 5.6062284 | 44.3360724 | C | 32.9131673 | 10.5186889 | 40.3290337 |
| C | 33.1109335 | 7.1748023 | 47.7322533 | C | 31.6656414 | 10.9998589 | 41.0940714 |
| C | 32.0841091 | 6.6368535 | 48.4782163 | C | 31.1557868 | 9.9535782  | 42.0948152 |
| C | 31.1166287 | 5.7508686 | 47.9008362 | C | 32.2092744 | 9.6729468  | 43.1781364 |
| C | 29.0946585 | 4.3790755 | 48.0165734 | O | 33.5750100 | 8.4139757  | 41.5121982 |
| C | 30.0249322 | 5.1988158 | 48.6525498 | C | 36.5996835 | 8.1649715  | 39.4741950 |
| O | 28.0596974 | 3.8487872 | 48.7246853 | C | 37.7271566 | 8.6102365  | 38.7523833 |
| H | 26.4414796 | 8.1890064 | 42.5127541 | C | 37.6695015 | 8.7611891  | 37.3634448 |
| H | 24.9156258 | 6.6443604 | 41.3978506 | C | 36.4909681 | 8.4792990  | 36.6586416 |
| H | 27.9149024 | 2.0718868 | 38.9596698 | C | 35.3608859 | 8.0591938  | 37.3754537 |
| H | 24.4992817 | 2.4314232 | 38.6698692 | C | 35.4064211 | 7.9120264  | 38.7617625 |
| H | 36.5176844 | 2.9270945 | 43.7441756 | N | 36.6464193 | 7.9753683  | 40.8500827 |
| H | 38.9799012 | 2.4303704 | 43.7702056 | H | 33.4249124 | 11.3729758 | 39.8510469 |
| H | 40.4334788 | 3.2231556 | 41.9668526 | H | 34.9735871 | 9.8865192  | 40.9582473 |
| H | 35.7612201 | 5.1028465 | 39.5276819 | H | 34.3851508 | 9.2037222  | 43.2989243 |
| H | 37.1717907 | 5.8634550 | 37.6907705 | H | 30.8726234 | 11.2681781 | 40.3737052 |
| H | 33.7113704 | 2.4763300 | 38.1649572 | H | 31.9146208 | 11.9276447 | 41.6477970 |
| H | 33.7659643 | 1.9434894 | 35.7092552 | H | 30.2251398 | 10.3070077 | 42.5744220 |
| H | 32.6449088 | 3.3922874 | 34.1017738 | H | 30.9121955 | 9.0111035  | 41.5732555 |
| H | 31.1272958 | 6.5293441 | 38.4902082 | H | 32.3252960 | 10.5561529 | 43.8371364 |

|                                          |            |           |            |   |            |           |            |
|------------------------------------------|------------|-----------|------------|---|------------|-----------|------------|
| H                                        | 31.9097483 | 8.8224231 | 43.8138506 | C | 39.0599213 | 5.5445709 | 38.8729117 |
| H                                        | 32.6278521 | 9.8298128 | 39.5123142 | C | 39.6257624 | 4.7718291 | 39.8863783 |
| H                                        | 38.6658517 | 8.8018993 | 39.2835670 | O | 39.8535415 | 6.0878891 | 37.9080688 |
| H                                        | 38.5621504 | 9.1034235 | 36.8265951 | O | 34.7642925 | 5.4319621 | 41.8213974 |
| H                                        | 36.4508969 | 8.5919098 | 35.5709068 | O | 34.2511127 | 3.2775118 | 42.1727712 |
| H                                        | 34.4271738 | 7.8248864 | 36.8523759 | C | 35.0732444 | 4.2142862 | 41.9657697 |
| H                                        | 34.5291029 | 7.5412101 | 39.2950494 | C | 32.4918614 | 3.9986624 | 37.9250133 |
| H                                        | 35.9796301 | 7.2933042 | 41.2189464 | C | 33.1599919 | 2.8701744 | 37.4871678 |
| H                                        | 37.5778373 | 7.8365047 | 41.2337976 | C | 33.2012697 | 2.5758444 | 36.1067983 |
| H                                        | 24.5176623 | 4.5091947 | 39.9960500 | C | 32.5647089 | 3.3933524 | 35.1954698 |
| H                                        | 40.7378829 | 4.5234995 | 39.7193827 | C | 31.8242086 | 4.5514559 | 35.6008555 |
| H                                        | 31.2464955 | 5.4983020 | 33.5800144 | C | 31.7854376 | 4.8447047 | 37.0107304 |
| H                                        | 29.9288094 | 5.3729950 | 49.7242253 | C | 30.9984703 | 5.9442757 | 37.4580695 |
|                                          |            |           |            | C | 30.3036489 | 6.7189452 | 36.5662637 |
|                                          |            |           |            | C | 30.3682975 | 6.4661247 | 35.1693547 |
| ( <i>S,S</i> )-1-RC (open-shell singlet) |            |           |            | C | 31.1233904 | 5.4049935 | 34.6746952 |
| C                                        | 26.8891526 | 7.4716274 | 41.8392391 | O | 29.6462298 | 7.3612854 | 34.4321586 |
| C                                        | 26.0228645 | 6.5741577 | 41.2486777 | O | 32.9740812 | 5.5065680 | 39.6673081 |
| C                                        | 26.4771861 | 5.3383914 | 40.6844074 | O | 32.2560975 | 3.4447532 | 40.2161020 |
| C                                        | 27.8841621 | 5.0430183 | 40.7865420 | C | 32.5700853 | 4.3407810 | 39.3805531 |
| C                                        | 27.5271458 | 2.9855298 | 39.5411097 | C | 28.7502298 | 5.9819942 | 41.4356688 |
| C                                        | 26.1334780 | 3.2508435 | 39.4615505 | C | 28.2682111 | 7.1849831 | 41.9222717 |
| C                                        | 25.6001664 | 4.4073377 | 40.0241089 | C | 28.3756987 | 3.8463604 | 40.1871474 |
| O                                        | 25.4389500 | 2.2761818 | 38.8026703 | O | 31.0247929 | 6.6053060 | 41.3229516 |
| Cu                                       | 32.9937053 | 6.3133474 | 41.4978457 | O | 30.5166429 | 4.5491545 | 42.0816239 |
| Cu                                       | 32.3680083 | 3.8677810 | 42.1535351 | C | 30.2048483 | 5.6890299 | 41.6220875 |
| C                                        | 36.5314758 | 3.8923953 | 41.9000022 | C | 32.3590848 | 6.2001355 | 45.6848111 |
| C                                        | 37.0668388 | 3.0907515 | 42.8889039 | C | 33.2231731 | 7.1079768 | 46.2696120 |
| C                                        | 38.4593298 | 2.8596861 | 42.9314868 | C | 31.2900100 | 5.6082685 | 46.4379383 |
| C                                        | 39.2895767 | 3.4062039 | 41.9769341 | C | 30.3123517 | 4.7635019 | 45.8382921 |
| C                                        | 38.7810219 | 4.2132068 | 40.9072066 | C | 29.2908367 | 4.2266176 | 46.5839224 |
| C                                        | 37.3612396 | 4.4575700 | 40.8745329 | O | 32.8419840 | 6.7489757 | 43.4309943 |
| C                                        | 36.8308458 | 5.2308088 | 39.8016293 | O | 32.5258461 | 4.5862472 | 43.9766700 |
| C                                        | 37.6548691 | 5.7581874 | 38.8352582 |   |            |           |            |



|   |            |           |            |   |            |            |            |
|---|------------|-----------|------------|---|------------|------------|------------|
| C | 32.5879294 | 5.8208659 | 44.2541968 | C | 33.4279802 | 8.5220725  | 38.4704369 |
| C | 33.1053373 | 7.4071868 | 47.6456414 | C | 32.0545564 | 8.9508358  | 39.0096717 |
| C | 32.1191400 | 6.8200989 | 48.4096590 | C | 32.1502806 | 10.2597469 | 39.8024000 |
| C | 31.1655606 | 5.9131567 | 47.8416604 | C | 33.0374926 | 10.1119529 | 41.0515502 |
| C | 29.1878529 | 4.4809592 | 47.9775963 | O | 34.2141511 | 7.9282804  | 40.7693332 |
| C | 30.1063840 | 5.3182949 | 48.6091110 | C | 37.3268345 | 7.2727250  | 43.4406084 |
| O | 28.1793398 | 3.9119472 | 48.6951081 | C | 38.6358301 | 7.5412044  | 43.8910844 |
| H | 26.5044958 | 8.4115790 | 42.2478493 | C | 39.0149187 | 7.2548821  | 45.2041813 |
| H | 24.9598571 | 6.8327494 | 41.2065493 | C | 38.1005925 | 6.7031713  | 46.1095602 |
| H | 27.8994162 | 2.0740003 | 39.0663655 | C | 36.7939749 | 6.4457692  | 45.6735442 |
| H | 24.4922551 | 2.4730337 | 38.7275081 | C | 36.4076607 | 6.7225864  | 44.3608117 |
| H | 36.4067765 | 2.6699046 | 43.6515045 | N | 36.9331935 | 7.5778058  | 42.1400393 |
| H | 38.8817844 | 2.2515604 | 43.7372089 | H | 33.3790047 | 7.4948234  | 38.0699735 |
| H | 40.3643412 | 3.2129613 | 42.0453761 | H | 35.5336553 | 8.3809657  | 39.1859426 |
| H | 35.7571108 | 5.4148099 | 39.7391732 | H | 35.2319350 | 9.6809477  | 41.3146578 |
| H | 37.2250392 | 6.3475120 | 38.0156821 | H | 31.6422977 | 8.1589596  | 39.6578979 |
| H | 33.6686223 | 2.2289516 | 38.2122128 | H | 31.3554118 | 9.0590514  | 38.1631684 |
| H | 33.7460527 | 1.6929888 | 35.7573342 | H | 32.5692408 | 11.0506392 | 39.1480864 |
| H | 32.6232839 | 3.1284836 | 34.1349796 | H | 31.1441496 | 10.5998128 | 40.1049047 |
| H | 30.9355578 | 6.1710515 | 38.5230630 | H | 32.4991147 | 9.5511669  | 41.8394649 |
| H | 29.6801087 | 7.5510013 | 36.9036336 | H | 33.2773486 | 11.1028962 | 41.4756795 |
| H | 28.9603684 | 7.8925878 | 42.3863369 | H | 33.7375082 | 9.1888250  | 37.6416476 |
| H | 29.4396128 | 3.6111066 | 40.2332272 | H | 39.3536346 | 7.9940004  | 43.1994576 |
| H | 34.0127871 | 7.5662035 | 45.6702763 | H | 40.0403228 | 7.4713612  | 45.5238639 |
| H | 30.3606320 | 4.5438317 | 44.7712217 | H | 38.4000064 | 6.4816195  | 47.1387161 |
| H | 28.5423926 | 3.5879657 | 46.0995712 | H | 36.0587375 | 6.0184035  | 46.3641991 |
| H | 29.6218851 | 7.1396878 | 33.4886051 | H | 35.3899481 | 6.5140823  | 44.0227351 |
| H | 39.3080425 | 6.5615250 | 37.2594749 | H | 37.6753688 | 7.5284910  | 41.4462108 |
| H | 33.8122048 | 8.1041380 | 48.1067517 | H | 36.0950641 | 7.0860854  | 41.8249549 |
| H | 32.0631559 | 7.0666774 | 49.4746237 | H | 24.5306784 | 4.6076511  | 39.9597946 |
| H | 27.6402836 | 3.3507556 | 48.1144334 | H | 40.7031527 | 4.6066874  | 39.8814073 |
| C | 34.3295411 | 9.3631652 | 40.7752762 | H | 31.1853557 | 5.2205882  | 33.6022114 |
| C | 34.5066624 | 8.5808240 | 39.5271721 | H | 30.0077568 | 5.4888275  | 49.6811454 |

(*R,R*)-2-RC (open-shell singlet)

|    |            |           |            |   |            |           |            |
|----|------------|-----------|------------|---|------------|-----------|------------|
| C  | 26.6847029 | 7.0687800 | 42.3127996 | C | 30.3327837 | 6.7628889 | 36.5450812 |
| C  | 25.8673109 | 6.2899983 | 41.5197242 | C | 30.4275122 | 6.5075613 | 35.1500619 |
| C  | 26.3759236 | 5.1974034 | 40.7433580 | C | 31.1362201 | 5.4050607 | 34.6802086 |
| C  | 27.7896967 | 4.9341423 | 40.8260954 | O | 29.7735513 | 7.4347600 | 34.3891226 |
| C  | 27.5353532 | 3.1202490 | 39.2286218 | O | 32.7863712 | 5.4632146 | 39.7117060 |
| C  | 26.1359299 | 3.3577764 | 39.1516046 | O | 32.1819070 | 3.3641617 | 40.2495012 |
| C  | 25.5473149 | 4.3751153 | 39.8990745 | C | 32.4393306 | 4.2828963 | 39.4175549 |
| O  | 25.4931736 | 2.4948991 | 38.3105447 | C | 28.6064808 | 5.7625742 | 41.6598961 |
| Cu | 32.8770064 | 6.2714774 | 41.5442945 | C | 28.0717853 | 6.8151655 | 42.3808172 |
| Cu | 32.3285087 | 3.7959894 | 42.1765546 | C | 28.3376176 | 3.8767840 | 40.0426606 |
| C  | 36.5088386 | 4.0254183 | 41.8076663 | O | 30.8584879 | 6.4551448 | 41.4743548 |
| C  | 37.0051485 | 3.1532026 | 42.7595284 | O | 30.4338323 | 4.3546442 | 42.1572785 |
| C  | 38.3820763 | 2.8422524 | 42.7860322 | C | 30.0747353 | 5.5027458 | 41.7717286 |
| C  | 39.2392674 | 3.3827281 | 41.8519071 | C | 32.2718058 | 6.0615347 | 45.7389479 |
| C  | 38.7719696 | 4.2600281 | 40.8196148 | C | 33.1371601 | 6.9754606 | 46.3123863 |
| C  | 37.3664619 | 4.5834370 | 40.8018375 | C | 31.1759727 | 5.5136304 | 46.4851681 |
| C  | 36.8771952 | 5.4161209 | 39.7545410 | C | 30.1984555 | 4.6615121 | 45.8949675 |
| C  | 37.7245460 | 5.9149910 | 38.7942718 | C | 29.1521072 | 4.1687419 | 46.6370075 |
| C  | 39.1163730 | 5.6321127 | 38.8250253 | O | 32.7913462 | 6.5880742 | 43.4998617 |
| C  | 39.6440492 | 4.8106779 | 39.8195408 | O | 32.4370711 | 4.4305161 | 44.0351822 |
| O  | 39.9356728 | 6.1630529 | 37.8751614 | C | 32.5168921 | 5.6616321 | 44.3175020 |
| O  | 34.7309445 | 5.5811808 | 41.7111922 | C | 32.9870783 | 7.3345958 | 47.6699405 |
| O  | 34.2521103 | 3.4193564 | 42.1224745 | C | 31.9733452 | 6.7904592 | 48.4296617 |
| C  | 35.0526940 | 4.3707890 | 41.8794944 | C | 31.0260660 | 5.8700342 | 47.8740227 |
| C  | 32.3627680 | 3.9448993 | 37.9615826 | C | 29.0290121 | 4.4667866 | 48.0207569 |
| C  | 32.9939267 | 2.7896514 | 37.5365655 | C | 29.9497152 | 5.3085616 | 48.6419570 |
| C  | 33.0570047 | 2.4933220 | 36.1580206 | O | 28.0051903 | 3.9297277 | 48.7403848 |
| C  | 32.4783650 | 3.3375244 | 35.2330686 | H | 26.2591204 | 7.8930939 | 42.8936335 |
| C  | 31.7748708 | 4.5235497 | 35.6232840 | H | 24.7993686 | 6.5287492 | 41.4904028 |
| C  | 31.7108750 | 4.8184335 | 37.0315529 | H | 27.9480280 | 2.3139517 | 38.6165981 |
| C  | 30.9568684 | 5.9506914 | 37.4561508 | H | 24.5472237 | 2.6890647 | 38.2231389 |
|    |            |           |            | H | 36.3220887 | 2.7242047 | 43.4969023 |
|    |            |           |            | H | 38.7701919 | 2.1681940 | 43.5561213 |

|   |            |            |            |    |                                 |            |            |
|---|------------|------------|------------|----|---------------------------------|------------|------------|
| H | 40.3011448 | 3.1223013  | 41.9024444 | H  | 32.4282801                      | 10.0090485 | 40.9821055 |
| H | 35.8152590 | 5.6592026  | 39.7084693 | H  | 31.6886776                      | 8.3919852  | 39.2520761 |
| H | 37.3257461 | 6.5520435  | 37.9959202 | H  | 36.2275697                      | 10.4582617 | 38.8728541 |
| H | 33.4606735 | 2.1309378  | 38.2735529 | H  | 34.6623184                      | 10.8165720 | 38.1197444 |
| H | 33.5758822 | 1.5905623  | 35.8204753 | H  | 35.6017015                      | 8.6073366  | 37.3368987 |
| H | 32.5569709 | 3.0741790  | 34.1733200 | H  | 35.5471910                      | 8.0061509  | 39.0090308 |
| H | 30.8681058 | 6.1714259  | 38.5205503 | H  | 33.1502153                      | 8.8461865  | 37.2555530 |
| H | 29.7411804 | 7.6252284  | 36.8642511 | H  | 33.5034993                      | 7.2176899  | 37.8750019 |
| H | 28.7141249 | 7.4305296  | 43.0164531 | H  | 35.2092262                      | 9.8904354  | 41.0024403 |
| H | 29.4061438 | 3.6578444  | 40.0894527 | H  | 28.7199653                      | 11.5517590 | 42.2127763 |
| H | 33.9419421 | 7.4018992  | 45.7081596 | H  | 28.8696738                      | 12.5037551 | 44.4980426 |
| H | 30.2691675 | 4.3985289  | 44.8389777 | H  | 30.2642759                      | 11.3849191 | 46.2518033 |
| H | 28.4035596 | 3.5245272  | 46.1601975 | H  | 31.5140738                      | 9.2876932  | 45.6605423 |
| H | 29.7947197 | 7.2261886  | 33.4421731 | H  | 31.3917306                      | 8.3556584  | 43.3823007 |
| H | 39.4183637 | 6.7162637  | 37.2677968 | H  | 30.2184338                      | 8.3565928  | 41.2726441 |
| H | 33.6851408 | 8.0456252  | 48.1226486 | H  | 29.1804010                      | 9.6085013  | 40.7910083 |
| H | 31.8898187 | 7.0847618  | 49.4806366 | H  | 24.4736423                      | 4.5553818  | 39.8461832 |
| H | 27.4706235 | 3.3525018  | 48.1713943 | H  | 40.7181556                      | 4.6259844  | 39.8353635 |
| C | 32.7661149 | 8.5853554  | 39.3318892 | H  | 31.2023174                      | 5.2016945  | 33.6114056 |
| C | 33.2081440 | 9.5562507  | 40.3572490 | H  | 29.8665703                      | 5.4802361  | 49.7151211 |
| C | 34.5318545 | 10.2894597 | 40.2243280 |    |                                 |            |            |
| C | 35.1716334 | 10.1363655 | 38.8310974 |    | (S,S)-2-RC (open-shell singlet) |            |            |
| C | 35.0641342 | 8.7006314  | 38.2981097 | C  | 26.9386888                      | 7.1242977  | 41.7121897 |
| C | 33.5959262 | 8.2928532  | 38.1049101 | C  | 26.0457978                      | 6.1838344  | 41.2389740 |
| O | 33.3289835 | 8.1327837  | 40.5733902 | C  | 26.4736586                      | 4.9024402  | 40.7600254 |
| C | 30.0382885 | 9.8796878  | 42.6315353 | C  | 27.8825112                      | 4.6028587  | 40.8392097 |
| C | 29.3361027 | 11.0547782 | 42.9709297 | C  | 27.4550030                      | 2.4362731  | 39.8201738 |
| C | 29.4236205 | 11.5887076 | 44.2596184 | C  | 26.0638463                      | 2.7176459  | 39.7467595 |
| C | 30.2034261 | 10.9670099 | 45.2421200 | C  | 25.5667964                      | 3.9346162  | 40.2036483 |
| C | 30.9022899 | 9.7994402  | 44.9097889 | O  | 25.3358824                      | 1.7002185  | 39.2044153 |
| C | 30.8290880 | 9.2605282  | 43.6238032 | Cu | 33.0527143                      | 6.0109656  | 41.4985541 |
| N | 29.9972412 | 9.3532273  | 41.3399832 | Cu | 32.4277136                      | 3.5582454  | 42.0472308 |
| H | 34.3768802 | 11.3575851 | 40.4594692 | C  | 36.6001762                      | 3.6919331  | 41.7509065 |

|   |            |           |            |   |            |           |            |
|---|------------|-----------|------------|---|------------|-----------|------------|
| C | 37.1229257 | 2.7376059 | 42.6034401 | C | 32.3455788 | 5.6889833 | 45.6802565 |
| C | 38.5025896 | 2.4379204 | 42.5642622 | C | 33.1799877 | 6.6380076 | 46.2422384 |
| C | 39.3330224 | 3.0786125 | 41.6695200 | C | 31.3165907 | 5.0584719 | 46.4550517 |
| C | 38.8332392 | 4.0441439 | 40.7355340 | C | 30.3887773 | 4.1381365 | 45.8881565 |
| C | 37.4244827 | 4.3436644 | 40.7747755 | C | 29.4020312 | 3.5677744 | 46.6561326 |
| C | 36.8939477 | 5.2466734 | 39.8086100 | O | 32.7338052 | 6.3067316 | 43.4400138 |
| C | 37.7111817 | 5.8428374 | 38.8786239 | O | 32.5610874 | 4.1151736 | 43.9297048 |
| C | 39.1104199 | 5.5972147 | 38.8666054 | C | 32.5593272 | 5.3422495 | 44.2401399 |
| C | 39.6735536 | 4.7045026 | 39.7760640 | C | 33.0650804 | 6.9571256 | 47.6128565 |
| O | 39.9021651 | 6.2332787 | 37.9583951 | C | 32.1020937 | 6.3533592 | 48.3927995 |
| O | 34.8535639 | 5.2701670 | 41.8787890 | C | 31.1823267 | 5.3977778 | 47.8498494 |
| O | 34.3307237 | 3.0830654 | 41.9876261 | C | 29.2787255 | 3.8735193 | 48.0380200 |
| C | 35.1517584 | 4.0418340 | 41.8810051 | C | 30.1484531 | 4.7842550 | 48.6349748 |
| C | 32.6164222 | 3.9141936 | 37.8350214 | O | 28.3008707 | 3.2823481 | 48.7789383 |
| C | 33.1889805 | 2.7552431 | 37.3450057 | H | 26.5738219 | 8.0991212 | 42.0500600 |
| C | 33.1662719 | 2.4975611 | 35.9575304 | H | 24.9834180 | 6.4451424 | 41.2202294 |
| C | 32.5463786 | 3.3759157 | 35.0933850 | H | 27.7975648 | 1.4726521 | 39.4342702 |
| C | 31.9042045 | 4.5708343 | 35.5560572 | H | 24.3945626 | 1.9167249 | 39.1119618 |
| C | 31.9531806 | 4.8416008 | 36.9691170 | H | 36.4622082 | 2.2366380 | 43.3157824 |
| C | 31.2987181 | 6.0071571 | 37.4658494 | H | 38.9150743 | 1.6945710 | 43.2538088 |
| C | 30.6235197 | 6.8483037 | 36.6177442 | H | 40.3983894 | 2.8275640 | 41.6715143 |
| C | 30.5647166 | 6.5862763 | 35.2221532 | H | 35.8251393 | 5.4632972 | 39.7910641 |
| C | 31.2152419 | 5.4833197 | 34.6792949 | H | 37.2813065 | 6.5259531 | 38.1361707 |
| O | 29.8358705 | 7.5157562 | 34.5321738 | H | 33.6685874 | 2.0565948 | 38.0357572 |
| O | 33.1901406 | 5.3028889 | 39.6496936 | H | 33.6398329 | 1.5920062 | 35.5650419 |
| O | 32.3057159 | 3.2779913 | 40.0877612 | H | 32.5416522 | 3.1317058 | 34.0262978 |
| C | 32.7096985 | 4.1849629 | 39.3026569 | H | 31.3214095 | 6.2311271 | 38.5339127 |
| C | 28.7796234 | 5.5915319 | 41.3635862 | H | 30.1010216 | 7.7306562 | 36.9946112 |
| C | 28.3195133 | 6.8371315 | 41.7580406 | H | 29.0326312 | 7.5790666 | 42.1251367 |
| C | 28.3378562 | 3.3455894 | 40.3428416 | H | 29.4006697 | 3.1048363 | 40.3709016 |
| O | 31.0561807 | 6.2161308 | 41.1974301 | H | 33.9384140 | 7.1182069 | 45.6183443 |
| O | 30.5584537 | 4.1911504 | 42.0384161 | H | 30.4516699 | 3.8865719 | 44.8290121 |
| C | 30.2410349 | 5.3112468 | 41.5368597 | H | 28.6958033 | 2.8636936 | 46.1999622 |

|   |            |            |            |        |            |           |            |
|---|------------|------------|------------|--------|------------|-----------|------------|
| H | 29.6839229 | 7.2634387  | 33.6080400 | H      | 27.4180401 | 7.0730571 | 35.4503148 |
| H | 39.3613508 | 6.8235624  | 37.4092327 | H      | 28.2603215 | 6.3786305 | 37.6533533 |
| H | 33.7482871 | 7.6869340  | 48.0585606 | H      | 27.5034961 | 6.8461862 | 39.0954242 |
| H | 32.0420929 | 6.6220767  | 49.4520397 | H      | 24.5057951 | 4.1672335 | 40.1129195 |
| H | 27.7925444 | 2.6687721  | 48.2242484 | H      | 40.7535569 | 4.5574114 | 39.7712217 |
| C | 32.4953853 | 8.9981203  | 40.5854095 | H      | 31.2430367 | 5.3249778 | 33.6012310 |
| C | 33.0735102 | 9.0901739  | 41.9430149 | H      | 30.0362972 | 4.9994483 | 49.6976034 |
| C | 34.1266788 | 10.1223666 | 42.2742162 |        |            |           |            |
| C | 34.8409852 | 10.6421789 | 41.0163951 | RCext1 |            |           |            |
| C | 33.8213619 | 11.0905679 | 39.9590791 | C      | 27.1164496 | 7.4277875 | 41.6356270 |
| C | 32.9305943 | 9.9317242  | 39.4707004 | C      | 26.2012760 | 6.5062191 | 41.1695765 |
| O | 33.5133271 | 8.0646831  | 41.0285576 | C      | 26.5898806 | 5.1897635 | 40.7613574 |
| C | 26.5367026 | 7.4625645  | 37.3947624 | C      | 27.9855728 | 4.8438371 | 40.8813919 |
| C | 25.3972883 | 7.9761743  | 38.0543373 | C      | 27.5057495 | 2.6670896 | 39.9082948 |
| C | 24.2836737 | 8.4041740  | 37.3288231 | C      | 26.1225088 | 2.9825299 | 39.8245483 |
| C | 24.2700129 | 8.3407508  | 35.9288761 | C      | 25.6540615 | 4.2265829 | 40.2398178 |
| C | 25.4070447 | 7.8532267  | 35.2684960 | O      | 25.3710003 | 1.9642227 | 39.3075551 |
| C | 26.5268035 | 7.4227162  | 35.9815755 | Cu     | 33.1700484 | 6.0581304 | 41.6506438 |
| N | 27.6473272 | 7.0483948  | 38.1101958 | Cu     | 32.4485015 | 3.6274648 | 42.1993203 |
| H | 34.8479394 | 9.6764997  | 42.9842579 | C      | 36.6480858 | 3.6345715 | 41.9899442 |
| H | 32.4966424 | 8.6855825  | 42.7847821 | C      | 37.2057102 | 2.9135852 | 43.0267200 |
| H | 31.5178230 | 8.5109717  | 40.4809651 | C      | 38.5990002 | 2.6725868 | 43.0424931 |
| H | 35.4830244 | 9.8424922  | 40.6034767 | C      | 39.4053867 | 3.1368970 | 42.0253778 |
| H | 35.5049513 | 11.4813627 | 41.2891896 | C      | 38.8674855 | 3.8534469 | 40.9060625 |
| H | 33.1816093 | 11.8796247 | 40.4019207 | C      | 37.4479202 | 4.0898164 | 40.8921241 |
| H | 34.3338899 | 11.5526340 | 39.0965908 | C      | 36.8760421 | 4.7432958 | 39.7639532 |
| H | 33.4649184 | 9.3184548  | 38.7211886 | C      | 37.6639648 | 5.1688495 | 38.7207101 |
| H | 32.0314401 | 10.3273503 | 38.9657418 | C      | 39.0733113 | 4.9844191 | 38.7461834 |
| H | 33.6289451 | 10.9579933 | 42.8041119 | C      | 39.6774402 | 4.3308250 | 39.8193777 |
| H | 25.3908595 | 8.0170045  | 39.1472575 | O      | 39.8346572 | 5.4430874 | 37.7140989 |
| H | 23.4109919 | 8.7883087  | 37.8689496 | O      | 34.9486248 | 5.2408385 | 41.9879522 |
| H | 23.3962814 | 8.6785467  | 35.3629887 | O      | 34.3473153 | 3.0797020 | 42.1883701 |
| H | 25.4257477 | 7.8127989  | 34.1734276 | C      | 35.1989323 | 4.0052481 | 42.0594711 |

|   |            |           |            |   |            |           |            |
|---|------------|-----------|------------|---|------------|-----------|------------|
| C | 32.6100903 | 3.8983514 | 37.9909584 | C | 30.5481807 | 4.9040177 | 52.4634045 |
| C | 33.0252742 | 2.6649609 | 37.5204283 | C | 29.5978822 | 5.8887838 | 52.8834224 |
| C | 33.0316125 | 2.4103255 | 36.1327136 | C | 28.8690536 | 6.6127591 | 51.9751683 |
| C | 32.5946936 | 3.3711295 | 35.2442453 | C | 29.0481783 | 6.4222548 | 50.5799818 |
| C | 32.1060372 | 4.6452476 | 35.6818140 | C | 29.9323102 | 5.4551556 | 50.1126152 |
| C | 32.1212969 | 4.9081932 | 37.0979526 | O | 28.3103322 | 7.2178923 | 49.7773735 |
| C | 31.6005912 | 6.1515849 | 37.5654725 | C | 33.4438020 | 6.6775937 | 47.8771426 |
| C | 31.1193089 | 7.0867727 | 36.6852338 | C | 32.3358936 | 6.2551986 | 48.5826508 |
| C | 31.1237990 | 6.8480591 | 35.2840880 | C | 31.2462316 | 5.6065767 | 47.9300165 |
| C | 31.6036969 | 5.6450597 | 34.7756016 | C | 29.0149292 | 4.6336104 | 47.9523383 |
| O | 30.6237381 | 7.8917770 | 34.5574480 | C | 30.0634706 | 5.2317866 | 48.6457527 |
| O | 33.2604220 | 5.2577277 | 39.8038138 | O | 27.8980548 | 4.3001753 | 48.6476344 |
| O | 32.3069532 | 3.2719215 | 40.2536477 | H | 26.7820974 | 8.4288991 | 41.9260007 |
| C | 32.7264901 | 4.1619272 | 39.4570793 | H | 25.1505997 | 6.8077978 | 41.1067648 |
| C | 28.9055120 | 5.8122056 | 41.4075573 | H | 27.8249186 | 1.6868919 | 39.5439415 |
| C | 28.4799410 | 7.0859111 | 41.7467711 | H | 24.4274842 | 2.1815778 | 39.2497002 |
| C | 28.4086898 | 3.5615611 | 40.4223985 | H | 36.5699137 | 2.5600519 | 43.8431916 |
| O | 31.2065283 | 6.3665898 | 41.3438021 | H | 39.0429002 | 2.1233920 | 43.8787065 |
| O | 30.6130042 | 4.3549148 | 42.1544194 | H | 40.4808655 | 2.9414965 | 42.0779662 |
| C | 30.3469006 | 5.4859676 | 41.6432556 | H | 35.7976477 | 4.9094540 | 39.7179937 |
| C | 32.5305236 | 5.7624279 | 45.8317810 | H | 37.2047075 | 5.6625032 | 37.8557344 |
| C | 33.5358555 | 6.4525427 | 46.4841648 | H | 33.3671500 | 1.9075586 | 38.2305312 |
| C | 31.3514421 | 5.3392976 | 46.5238229 | H | 33.3874138 | 1.4448312 | 35.7590439 |
| C | 30.2591783 | 4.7040940 | 45.8644869 | H | 32.6191685 | 3.1346127 | 34.1754143 |
| C | 29.1195151 | 4.3739529 | 46.5601414 | H | 31.5671461 | 6.3586188 | 38.6362643 |
| O | 32.9380974 | 6.3977560 | 43.5932304 | H | 30.7065135 | 8.0365689 | 37.0362908 |
| O | 32.5960269 | 4.2187963 | 44.0659989 | H | 29.2086507 | 7.8086983 | 42.1211999 |
| C | 32.7018327 | 5.4406125 | 44.3814259 | H | 29.4631802 | 3.2885675 | 40.4697772 |
| C | 31.3406746 | 4.1056965 | 53.3500137 | H | 34.4056597 | 6.7998684 | 45.9189928 |
| C | 32.1505989 | 3.0824344 | 52.8913770 | H | 30.3178542 | 4.4798534 | 44.7972696 |
| C | 32.2357870 | 2.8346773 | 51.5013360 | H | 28.2797093 | 3.8982466 | 46.0399224 |
| C | 31.5318421 | 3.6119161 | 50.6068579 | H | 30.5918635 | 7.7060749 | 33.6058633 |
| C | 30.6748927 | 4.6616063 | 51.0490635 | H | 39.2680648 | 5.8626339 | 37.0464305 |

|   |            |            |            |        |            |            |            |
|---|------------|------------|------------|--------|------------|------------|------------|
| H | 32.7397202 | 2.4669018  | 53.5798075 | H      | 36.5114751 | 7.2733113  | 40.5298636 |
| H | 32.8714918 | 2.0209971  | 51.1392532 | H      | 38.4154725 | 8.0640328  | 41.8999367 |
| H | 31.6193565 | 3.4168436  | 49.5357673 | H      | 38.0371605 | 9.6828426  | 43.7753369 |
| H | 29.4251867 | 6.0805052  | 53.9461951 | H      | 35.7160256 | 10.4911958 | 44.2474738 |
| H | 28.1428187 | 7.3621948  | 52.3005542 | H      | 33.8067351 | 9.6897785  | 42.8700343 |
| H | 34.2561779 | 7.1947914  | 48.3977442 | H      | 34.1902054 | 7.6663480  | 39.8881730 |
| H | 32.2742711 | 6.4257717  | 49.6596918 | H      | 33.1487368 | 8.6001040  | 40.7929015 |
| H | 27.2307641 | 3.9254684  | 48.0494762 | H      | 24.5945804 | 4.4690724  | 40.1575666 |
| H | 28.6563682 | 7.2557793  | 48.8552751 | H      | 40.7609839 | 4.2127638  | 39.8271983 |
| C | 28.9998300 | 11.0855523 | 47.7111262 | H      | 31.5963319 | 5.4538607  | 33.7025428 |
| C | 29.2663525 | 9.8038513  | 48.4698021 | H      | 31.3359034 | 4.3011934  | 54.4223125 |
| C | 30.5659713 | 9.1141311  | 48.3577497 |        |            |            |            |
| C | 31.6773627 | 9.6456738  | 47.4663258 | RCext2 |            |            |            |
| C | 31.4176982 | 11.0821148 | 46.9783440 | C      | 26.8985670 | 7.1413500  | 42.5026840 |
| C | 29.9637269 | 11.2806339 | 46.5307715 | C      | 26.0378840 | 6.3429930  | 41.7772270 |
| O | 29.3990049 | 8.6091862  | 47.6785761 | C      | 26.4988280 | 5.2064340  | 41.0378220 |
| C | 35.0433444 | 8.4621817  | 41.5871809 | C      | 27.9048140 | 4.8994750  | 41.1066590 |
| C | 36.3409391 | 7.9996438  | 41.3280873 | C      | 27.5587240 | 3.0327780  | 39.5874130 |
| C | 37.4090318 | 8.4387915  | 42.1124628 | C      | 26.1685490 | 3.3193950  | 39.5204610 |
| C | 37.1975167 | 9.3389776  | 43.1633199 | C      | 25.6307600 | 4.3851730  | 40.2366550 |
| C | 35.8991301 | 9.7904122  | 43.4262685 | O      | 25.4821230 | 2.4589120  | 38.7115390 |
| C | 34.8243009 | 9.3527891  | 42.6470029 | Cu     | 33.0479980 | 6.0849930  | 41.9312830 |
| N | 33.9409953 | 7.9569426  | 40.8362188 | Cu     | 32.3816740 | 3.6129850  | 42.4111720 |
| H | 32.6339229 | 9.5917240  | 48.0145464 | C      | 36.5446410 | 3.6037700  | 42.1445120 |
| H | 28.6800947 | 9.6499756  | 49.3867098 | C      | 37.0879750 | 2.7815610  | 43.1127980 |
| H | 30.8776419 | 8.4749520  | 49.1941943 | C      | 38.4743310 | 2.5068530  | 43.1070640 |
| H | 32.1141815 | 11.3297456 | 46.1568620 | C      | 39.2901140 | 3.0364510  | 42.1300850 |
| H | 31.6352851 | 11.7946900 | 47.7990318 | C      | 38.7679470 | 3.8560120  | 41.0759330 |
| H | 29.8247119 | 12.2889344 | 46.1010350 | C      | 37.3541590 | 4.1323970  | 41.0853760 |
| H | 29.7197703 | 10.5533288 | 45.7352334 | C      | 36.8020600 | 4.8875150  | 40.0121350 |
| H | 27.9477700 | 11.0948755 | 47.3687710 | C      | 37.5995570 | 5.3586950  | 38.9972520 |
| H | 29.1099802 | 11.9244787 | 48.4270900 | C      | 39.0021500 | 5.1359620  | 39.0053280 |
| H | 31.7768564 | 8.9573807  | 46.6071763 | C      | 39.5900980 | 4.3911430  | 40.0265050 |

|   |            |           |            |   |            |           |            |
|---|------------|-----------|------------|---|------------|-----------|------------|
| O | 39.7750740 | 5.6541260 | 38.0092730 | C | 32.0097930 | 3.2470740 | 52.8270510 |
| O | 34.8196230 | 5.1963040 | 42.1463070 | C | 32.0031290 | 2.9554640 | 51.4439790 |
| O | 34.2601210 | 3.0392800 | 42.4412720 | C | 31.1628010 | 3.6383070 | 50.5920650 |
| C | 35.0973130 | 3.9702410 | 42.2493090 | C | 30.2672640 | 4.6398020 | 51.0672690 |
| C | 32.6580950 | 4.0639140 | 38.1864260 | C | 30.2484850 | 4.9363140 | 52.4779290 |
| C | 33.1707220 | 2.8399120 | 37.7896510 | C | 29.2704430 | 5.8709610 | 52.9452840 |
| C | 33.2435980 | 2.5166910 | 36.4190710 | C | 28.3441320 | 6.4151460 | 52.0910010 |
| C | 32.7694840 | 3.3965240 | 35.4681350 | C | 28.3690640 | 6.1297880 | 50.7008700 |
| C | 32.1869600 | 4.6554860 | 35.8229780 | C | 29.3712160 | 5.3198350 | 50.1653350 |
| C | 32.1464420 | 4.9961810 | 37.2238310 | O | 27.3979260 | 6.6964790 | 49.9424530 |
| C | 31.5461740 | 6.2321350 | 37.6040400 | C | 32.9862670 | 6.6535360 | 48.1875890 |
| C | 31.0371550 | 7.0871270 | 36.6604450 | C | 31.8108460 | 6.2584740 | 48.7928170 |
| C | 31.0868050 | 6.7678060 | 35.2764790 | C | 30.7928200 | 5.5729420 | 48.0657790 |
| C | 31.6464700 | 5.5671150 | 34.8481120 | C | 28.5342810 | 4.7012150 | 47.8718100 |
| O | 30.5410580 | 7.7367850 | 34.4815860 | C | 29.5522460 | 5.1851680 | 48.6887960 |
| O | 33.0592220 | 5.5148540 | 40.0208070 | O | 27.3143050 | 4.4695400 | 48.4393390 |
| O | 32.3425800 | 3.4214180 | 40.4324360 | H | 26.5089120 | 8.0074690 | 43.0476070 |
| C | 32.6785600 | 4.3622430 | 39.6541650 | H | 24.9741500 | 6.6018720 | 41.7692110 |
| C | 28.7667380 | 5.7410590 | 41.8803170 | H | 27.9335650 | 2.1923430 | 38.9971610 |
| C | 28.2788240 | 6.8521720 | 42.5450040 | H | 24.5419920 | 2.6834320 | 38.6330090 |
| C | 28.4007530 | 3.7927540 | 40.3564220 | H | 36.4407560 | 2.3694660 | 43.8915630 |
| O | 31.0482690 | 6.3630110 | 41.7942180 | H | 38.9028140 | 1.8731380 | 43.8902640 |
| O | 30.5225860 | 4.2471650 | 42.3555830 | H | 40.3606470 | 2.8105690 | 42.1611010 |
| C | 30.2250660 | 5.4314870 | 42.0102440 | H | 35.7335570 | 5.1048820 | 39.9906050 |
| C | 32.2684090 | 5.6852560 | 46.0882160 | H | 37.1533170 | 5.9330110 | 38.1758720 |
| C | 33.2207770 | 6.3661250 | 46.8242120 | H | 33.5287480 | 2.1401620 | 38.5487430 |
| C | 31.0158980 | 5.3044370 | 46.6718900 | H | 33.6751100 | 1.5596150 | 36.1092890 |
| C | 29.9594500 | 4.7285420 | 45.9070630 | H | 32.8405770 | 3.1075040 | 34.4146170 |
| C | 28.7389880 | 4.4697110 | 46.4867290 | H | 31.4827810 | 6.4962220 | 38.6600330 |
| O | 32.8896040 | 6.3255500 | 43.9033560 | H | 30.5666660 | 8.0320170 | 36.9461820 |
| O | 32.4415050 | 4.1533750 | 44.3074330 | H | 28.9661430 | 7.4853830 | 43.1120590 |
| C | 32.5589350 | 5.3636260 | 44.6551030 | H | 29.4629940 | 3.5464850 | 40.3876720 |
| C | 31.1652740 | 4.2253830 | 53.3195670 | H | 34.1557850 | 6.6691560 | 46.3437420 |



|   |            |           |            |        |            |           |            |
|---|------------|-----------|------------|--------|------------|-----------|------------|
| H | 30.1061230 | 4.5030030 | 44.8489700 | H      | 22.7829580 | 3.7734790 | 45.7428220 |
| H | 27.9187530 | 4.0596770 | 45.8886750 | H      | 22.6322650 | 4.2561020 | 48.1598510 |
| H | 30.5685200 | 7.5101530 | 33.5389040 | H      | 22.3760880 | 5.9859550 | 47.8501950 |
| H | 39.2143530 | 6.1195700 | 37.3676910 | H      | 24.8158070 | 5.0606990 | 44.3126640 |
| H | 32.6836600 | 2.6885400 | 53.4859210 | H      | 35.8667130 | 7.9974010 | 39.9219890 |
| H | 32.6620460 | 2.1743350 | 51.0522670 | H      | 38.2589060 | 7.9289460 | 40.5831920 |
| H | 31.1608580 | 3.3894880 | 49.5293510 | H      | 38.9034500 | 8.0909730 | 42.9956920 |
| H | 29.2170860 | 6.1415370 | 54.0039800 | H      | 37.1159410 | 8.3096390 | 44.7324740 |
| H | 27.5596030 | 7.0824640 | 52.4568780 | H      | 34.7160720 | 8.3321430 | 44.0629940 |
| H | 33.7400330 | 7.1972940 | 48.7662090 | H      | 33.6011670 | 8.3579390 | 40.5989050 |
| H | 31.6413110 | 6.4932140 | 49.8446300 | H      | 33.1683580 | 8.7306870 | 42.1666620 |
| H | 26.6225490 | 4.2127130 | 47.7716870 | H      | 24.5670492 | 4.6130283 | 40.1683345 |
| H | 27.1680400 | 6.0496060 | 49.2382480 | H      | 40.6701700 | 4.2446809 | 40.0187652 |
| C | 22.8846480 | 5.0797980 | 47.4668220 | H      | 31.6547454 | 5.3111318 | 33.7886449 |
| C | 24.3739920 | 5.3362930 | 47.5252380 | H      | 31.1981198 | 4.4107399 | 54.3931733 |
| C | 25.1243930 | 5.7233950 | 46.3144040 |        |            |           |            |
| C | 24.4424610 | 5.8693820 | 44.9660940 |        |            |           |            |
| C | 22.9061880 | 5.8294650 | 45.0524130 | RCext3 |            |           |            |
| C | 22.4052080 | 4.7675590 | 46.0403840 | C      | 26.9815540 | 7.4357870 | 42.1244300 |
| O | 25.1987200 | 4.3732720 | 46.8347280 | C      | 26.1004920 | 6.5520620 | 41.5350960 |
| C | 35.1477090 | 8.2150330 | 41.9492040 | C      | 26.5378530 | 5.3173690 | 40.9547190 |
| C | 36.1457520 | 8.0932210 | 40.9764030 | C      | 27.9408930 | 5.0009230 | 41.0499090 |
| C | 37.4907140 | 8.0479940 | 41.3532700 | C      | 27.5474160 | 2.9502010 | 39.8044250 |
| C | 37.8504640 | 8.1322770 | 42.7012220 | C      | 26.1585150 | 3.2406330 | 39.7244470 |
| C | 36.8486350 | 8.2551310 | 43.6721390 | C      | 25.6457970 | 4.4060950 | 40.2877610 |
| C | 35.5028740 | 8.2901570 | 43.3038830 | O      | 25.4468250 | 2.2817810 | 39.0601900 |
| N | 33.7683510 | 8.1439810 | 41.5834960 | Cu     | 33.0816040 | 6.1273830 | 41.7486970 |
| H | 24.7759370 | 6.8105970 | 44.4983350 | Cu     | 32.3695930 | 3.6942070 | 42.3071930 |
| H | 24.7759280 | 5.6327730 | 48.5064580 | C      | 36.5419130 | 3.6407510 | 41.8911780 |
| H | 26.0659510 | 6.2764360 | 46.4471660 | C      | 37.0582690 | 2.7277810 | 42.7908770 |
| H | 22.4884960 | 5.6558860 | 44.0454690 | C      | 38.4376490 | 2.4212660 | 42.7708380 |
| H | 22.5322860 | 6.8187160 | 45.3824810 | C      | 39.2749540 | 3.0169120 | 41.8518310 |
| H | 21.3018580 | 4.7138490 | 46.0242930 | C      | 38.7814500 | 3.9374510 | 40.8698500 |
|   |            |           |            | C      | 37.3728570 | 4.2368450 | 40.8860670 |

|   |            |           |            |   |            |           |            |
|---|------------|-----------|------------|---|------------|-----------|------------|
| C | 36.8471520 | 5.0856730 | 39.8707080 | O | 32.9286350 | 6.3988860 | 43.7230360 |
| C | 37.6684020 | 5.6381730 | 38.9166710 | O | 32.6132510 | 4.2129450 | 44.1823900 |
| C | 39.0690660 | 5.3978810 | 38.9281350 | C | 32.7322500 | 5.4291660 | 44.5069320 |
| C | 39.6273860 | 4.5523490 | 39.8851870 | C | 31.0900690 | 4.1769010 | 53.3429740 |
| O | 39.8658550 | 5.9886360 | 37.9944390 | C | 31.6715650 | 3.0156560 | 52.8608770 |
| O | 34.8568110 | 5.2749130 | 41.9901100 | C | 31.6539910 | 2.7476150 | 51.4728020 |
| O | 34.2509970 | 3.1151430 | 42.1794750 | C | 31.0792650 | 3.6439160 | 50.5996930 |
| C | 35.1052490 | 4.0359790 | 42.0252010 | C | 30.4569210 | 4.8378800 | 51.0646510 |
| C | 32.4372070 | 3.9486000 | 38.1005430 | C | 30.4242440 | 5.1089070 | 52.4782500 |
| C | 32.8318820 | 2.6823160 | 37.7024630 | C | 29.6819020 | 6.2594730 | 52.9035870 |
| C | 32.8372180 | 2.3462730 | 36.3329020 | C | 29.0781690 | 7.1004220 | 52.0015190 |
| C | 32.4247760 | 3.2624600 | 35.3877230 | C | 29.1869910 | 6.8757580 | 50.6040330 |
| C | 31.9587140 | 4.5678330 | 35.7483330 | C | 29.8579440 | 5.7517030 | 50.1386080 |
| C | 31.9685480 | 4.9112290 | 37.1475520 | O | 28.6170250 | 7.7922310 | 49.7963220 |
| C | 31.4601280 | 6.1843770 | 37.5393300 | C | 33.5062480 | 6.6344070 | 48.0135750 |
| C | 30.9937020 | 7.0728600 | 36.6046730 | C | 32.3282520 | 6.3570880 | 48.6786410 |
| C | 31.0110280 | 6.7574530 | 35.2190340 | C | 31.2152800 | 5.7779250 | 48.0001930 |
| C | 31.4847870 | 5.5238070 | 34.7822460 | C | 28.9001830 | 5.0298600 | 47.9503930 |
| O | 30.5307110 | 7.7656150 | 34.4305650 | C | 29.9808870 | 5.5174890 | 48.6752810 |
| O | 33.0525360 | 5.3883250 | 39.8790460 | O | 27.7301330 | 4.8224760 | 48.6084450 |
| O | 32.1437610 | 3.3896810 | 40.3713920 | H | 26.6121160 | 8.3751800 | 42.5485670 |
| C | 32.5452260 | 4.2729740 | 39.5559420 | H | 25.0392330 | 6.8195250 | 41.5073920 |
| C | 28.8231560 | 5.9281570 | 41.6941810 | H | 27.9028890 | 2.0323730 | 39.3286010 |
| C | 28.3580100 | 7.1340560 | 42.1876630 | H | 24.5015380 | 2.4896930 | 38.9966510 |
| C | 28.4124140 | 3.7969200 | 40.4480730 | H | 36.3946090 | 2.2698970 | 43.5291000 |
| O | 31.1158440 | 6.5052870 | 41.5714410 | H | 38.8451320 | 1.7121790 | 43.4985240 |
| O | 30.5542240 | 4.4725160 | 42.3573650 | H | 40.3401990 | 2.7661640 | 41.8724990 |
| C | 30.2729710 | 5.6139610 | 41.8796090 | H | 35.7771350 | 5.2960660 | 39.8391420 |
| C | 32.5894400 | 5.7467110 | 45.9595680 | H | 37.2423740 | 6.2792690 | 38.1350650 |
| C | 33.6392110 | 6.3377920 | 46.6370540 | H | 33.1553440 | 1.9609480 | 38.4569820 |
| C | 31.3462760 | 5.4697310 | 46.6071700 | H | 33.1727370 | 1.3529100 | 36.0185570 |
| C | 30.2168380 | 4.9506570 | 45.9108410 | H | 32.4491560 | 2.9640010 | 34.3348370 |
| C | 29.0223600 | 4.7580710 | 46.5630430 | H | 31.4264010 | 6.4496180 | 38.5967460 |

|   |            |            |            |                     |            |            |            |
|---|------------|------------|------------|---------------------|------------|------------|------------|
| H | 30.5878650 | 8.0447450  | 36.8983460 | H                   | 30.7552930 | 9.1226620  | 48.4646250 |
| H | 29.0614660 | 7.8319760  | 42.6450120 | H                   | 31.6083500 | 9.7010110  | 44.2281080 |
| H | 29.4732950 | 3.5452760  | 40.4884820 | H                   | 31.1180190 | 11.0748460 | 45.2392250 |
| H | 34.5626690 | 6.5731820  | 46.0997830 | H                   | 29.2163830 | 10.2251240 | 43.8050460 |
| H | 30.2901620 | 4.7058900  | 44.8493700 | H                   | 29.3306110 | 8.6496010  | 44.6229980 |
| H | 28.1525870 | 4.3798660  | 46.0140310 | H                   | 27.5308090 | 9.9701910  | 45.6919200 |
| H | 30.5072970 | 7.5282010  | 33.4903630 | H                   | 28.6335660 | 11.3401580 | 45.9559650 |
| H | 39.3272700 | 6.5371830  | 37.4014920 | H                   | 31.6754110 | 8.1751080  | 46.0657500 |
| H | 32.1578640 | 2.2982870  | 53.5308090 | H                   | 36.3289130 | 7.8492760  | 40.4566080 |
| H | 32.1046170 | 1.8250850  | 51.0940010 | H                   | 38.3610290 | 8.2561660  | 41.8128040 |
| H | 31.0781290 | 3.4364610  | 49.5273690 | H                   | 38.1602130 | 9.0817530  | 44.1699320 |
| H | 29.5617650 | 6.4926910  | 53.9645020 | H                   | 35.8872730 | 9.4754970  | 45.1428610 |
| H | 28.5083860 | 7.9714970  | 52.3355180 | H                   | 33.8522350 | 9.0346200  | 43.7842430 |
| H | 34.3434290 | 7.0903880  | 48.5521040 | H                   | 33.9449180 | 8.1700670  | 40.2535190 |
| H | 32.2293450 | 6.5897270  | 49.7414940 | H                   | 32.9978510 | 8.7683610  | 41.4863130 |
| H | 27.0607010 | 4.4700650  | 47.9988880 | H                   | 24.5825349 | 4.6326588  | 40.2089638 |
| H | 28.8061420 | 7.6200760  | 48.8400100 | H                   | 40.7064327 | 4.3983464  | 39.8879804 |
| C | 28.5869460 | 10.2355890 | 45.8871290 | H                   | 31.5077637 | 5.2863307  | 33.7186937 |
| C | 29.0039480 | 9.6606620  | 47.2234830 | H                   | 31.1576135 | 4.3563453  | 54.4159623 |
| C | 30.3780550 | 9.1639540  | 47.4332100 |                     |            |            |            |
| C | 31.4251720 | 9.2136840  | 46.3351790 | RC <sub>BINOL</sub> |            |            |            |
| C | 30.9708430 | 9.9876120  | 45.0837600 | C                   | 32.1498739 | 5.5173470  | 46.1074779 |
| C | 29.4942860 | 9.7333350  | 44.7543510 | C                   | 33.0895520 | 6.2381857  | 46.8190598 |
| O | 29.2806070 | 8.2501230  | 47.2178120 | C                   | 30.8994434 | 5.1172876  | 46.6921639 |
| C | 34.9632700 | 8.4675490  | 42.0182010 | C                   | 29.8202745 | 4.5165932  | 45.9692292 |
| C | 36.2330890 | 8.2334470  | 41.4760900 | C                   | 28.6230786 | 4.2306176  | 46.5768115 |
| C | 37.3761540 | 8.4535900  | 42.2481290 | C                   | 31.1896364 | 4.1533062  | 53.3464409 |
| C | 37.2640080 | 8.9093950  | 43.5660970 | C                   | 32.0628960 | 3.2021222  | 52.8538673 |
| C | 35.9923570 | 9.1319620  | 44.1084690 | C                   | 32.0407890 | 2.8872599  | 51.4761852 |
| C | 34.8450670 | 8.9071810  | 43.3440770 | C                   | 31.1646963 | 3.5312089  | 50.6304205 |
| N | 33.7900510 | 8.1622770  | 41.2634500 | C                   | 30.2423384 | 4.5057958  | 51.1098770 |
| H | 32.3509910 | 9.6540420  | 46.7454430 | C                   | 30.2281198 | 4.8129154  | 52.5161449 |
| H | 28.4332010 | 9.9892720  | 48.1047960 | C                   | 29.2105915 | 5.6966068  | 52.9971119 |

|   |            |           |            |   |                     |            |            |
|---|------------|-----------|------------|---|---------------------|------------|------------|
| C | 28.2463975 | 6.1917889 | 52.1552608 | C | 29.1788982          | 8.4522712  | 46.0606720 |
| C | 28.2829390 | 5.9115782 | 50.7670396 | C | 28.2864497          | 8.1232488  | 47.0823687 |
| C | 29.3095925 | 5.1461957 | 50.2174273 | N | 26.0663805          | 8.2610219  | 48.0739632 |
| O | 27.2805090 | 6.4349142 | 50.0050988 | H | 24.9290834          | 6.5539397  | 44.4943719 |
| C | 32.8419388 | 6.5569829 | 48.1748667 | H | 24.7908480          | 5.5119690  | 48.5072829 |
| C | 31.6845418 | 6.1375666 | 48.7928305 | H | 26.1431501          | 6.0335229  | 46.4824508 |
| C | 30.6867468 | 5.4021110 | 48.0887254 | H | 22.5977318          | 5.5012527  | 44.0203043 |
| C | 28.4423673 | 4.4686725 | 47.9615807 | H | 22.6797793          | 6.6756316  | 45.3458356 |
| C | 29.4677510 | 4.9909981 | 48.7418398 | H | 21.3449931          | 4.6189169  | 45.9843260 |
| O | 27.2434200 | 4.2078191 | 48.5532688 | H | 22.8033841          | 3.6298644  | 45.7568634 |
| H | 34.0246911 | 6.5680071 | 46.3550537 | H | 22.6123878          | 4.1760094  | 48.1647172 |
| H | 29.9085027 | 4.2935505 | 44.9034357 | H | 22.4229104          | 5.9063797  | 47.7999535 |
| H | 27.8007517 | 3.7968413 | 46.0001450 | H | 24.8916607          | 4.7899935  | 44.3448377 |
| H | 32.7685049 | 2.6801886 | 53.5089524 | H | 25.5404409          | 9.8213243  | 45.9569862 |
| H | 32.7154494 | 2.1194202 | 51.0853161 | H | 27.1397929          | 10.4063427 | 44.1531779 |
| H | 31.1540428 | 3.2706411 | 49.5709371 | H | 29.4922359          | 9.5492668  | 44.2111235 |
| H | 29.1560465 | 5.9617174 | 54.0568976 | H | 30.1982837          | 8.0535238  | 46.0990798 |
| H | 27.4264689 | 6.8088480 | 52.5317834 | H | 28.6088425          | 7.4808780  | 47.9060803 |
| H | 33.5782922 | 7.1418416 | 48.7346038 | H | 25.2582821          | 8.8663101  | 48.1815199 |
| H | 31.5124940 | 6.3943354 | 49.8390185 | H | 26.4762171          | 7.9559514  | 48.9574377 |
| H | 26.5350717 | 3.9773058 | 47.8825935 | H | 32.3645462          | 5.2947745  | 45.0622776 |
| H | 27.0349172 | 5.7458793 | 49.3404214 | H | 31.2218428          | 4.3514764  | 54.4177755 |
| C | 22.9065076 | 4.9714852 | 47.4541651 |   |                     |            |            |
| C | 24.4009018 | 5.1825108 | 47.5338235 |   | TS <sub>BINOL</sub> |            |            |
| C | 25.1936574 | 5.5023751 | 46.3358530 | C | 32.1297379          | 4.9772959  | 46.0026662 |
| C | 24.5478979 | 5.6347663 | 44.9695591 | C | 33.0182828          | 5.7832470  | 46.6931833 |
| C | 23.0099839 | 5.6661914 | 45.0302449 | C | 30.9700255          | 4.4092758  | 46.6354201 |
| C | 22.4487794 | 4.6410048 | 46.0250552 | C | 29.9366707          | 3.6857059  | 45.9557578 |
| O | 25.2068299 | 4.1591881 | 46.9035877 | C | 28.8042333          | 3.2668483  | 46.6074983 |
| C | 26.9640871 | 8.6184782 | 47.0699291 | C | 31.3178150          | 3.7936258  | 53.4221657 |
| C | 26.5658241 | 9.4339638 | 45.9895518 | C | 32.2732272          | 2.8807619  | 53.0146369 |
| C | 27.4698774 | 9.7616253 | 44.9750015 | C | 32.3189607          | 2.4766930  | 51.6605629 |
| C | 28.7847832 | 9.2821567 | 45.0025675 | C | 31.4137423          | 2.9839041  | 50.7548521 |

|   |            |           |            |                     |            |           |            |
|---|------------|-----------|------------|---------------------|------------|-----------|------------|
| C | 30.4066418 | 3.9127216 | 51.1468819 | C                   | 27.0774557 | 8.7136731 | 45.7965093 |
| C | 30.3406478 | 4.3300623 | 52.5243616 | C                   | 28.1315954 | 9.1804189 | 45.0042379 |
| C | 29.2699464 | 5.1966056 | 52.9108810 | C                   | 29.4375454 | 8.7258160 | 45.2216698 |
| C | 28.2948362 | 5.5622641 | 52.0134980 | C                   | 29.6863827 | 7.8049913 | 46.2474110 |
| C | 28.3671026 | 5.1497576 | 50.6609758 | C                   | 28.6421528 | 7.3410882 | 47.0492610 |
| C | 29.4466751 | 4.4025444 | 50.1939084 | N                   | 26.2667350 | 7.2028968 | 47.5518240 |
| O | 27.3367515 | 5.4885144 | 49.8254648 | H                   | 26.3014653 | 6.2861444 | 44.9288082 |
| C | 32.8023537 | 6.0408149 | 48.0657417 | H                   | 25.1443410 | 4.6781971 | 48.6924615 |
| C | 31.7215519 | 5.4910860 | 48.7188443 | H                   | 27.0141400 | 5.1102017 | 46.9874570 |
| C | 30.7802053 | 4.6576929 | 48.0444744 | H                   | 23.9805287 | 5.7368616 | 43.9362993 |
| C | 28.6146836 | 3.5102321 | 47.9972820 | H                   | 23.9161301 | 6.7770577 | 45.3745230 |
| C | 29.6184680 | 4.1491024 | 48.7321129 | H                   | 22.2057508 | 4.9329571 | 45.5184516 |
| O | 27.4489067 | 3.1919392 | 48.5847989 | H                   | 23.5054801 | 3.7246701 | 45.3825365 |
| H | 33.8843156 | 6.2348088 | 46.1978523 | H                   | 22.9113494 | 3.9966574 | 47.7711662 |
| H | 29.9996460 | 3.4716597 | 44.8866992 | H                   | 23.2041692 | 5.7516008 | 47.6765130 |
| H | 28.0105731 | 2.7491324 | 46.0620271 | H                   | 25.9709769 | 4.5723966 | 44.7345000 |
| H | 32.9945483 | 2.4544617 | 53.7206675 | H                   | 26.0534016 | 9.0574851 | 45.6127542 |
| H | 33.0673932 | 1.7459860 | 51.3389850 | H                   | 27.9257331 | 9.8999179 | 44.2052048 |
| H | 31.4452999 | 2.6513258 | 49.7156890 | H                   | 30.2586764 | 9.0816426 | 44.5925812 |
| H | 29.1883444 | 5.5532088 | 53.9421575 | H                   | 30.6995414 | 7.4334172 | 46.4250895 |
| H | 27.4393012 | 6.1685557 | 52.3217261 | H                   | 28.8368107 | 6.6159559 | 47.8435685 |
| H | 33.4948719 | 6.6911939 | 48.6088477 | H                   | 25.4037710 | 7.7462443 | 47.5616181 |
| H | 31.5652812 | 5.7214849 | 49.7729070 | H                   | 26.5314372 | 6.8889732 | 48.4946615 |
| H | 26.5878470 | 3.0895351 | 47.8735253 | H                   | 32.3134522 | 4.8382783 | 44.9373073 |
| H | 27.1563382 | 4.6438502 | 49.3145572 | H                   | 31.3049032 | 4.0499931 | 54.4814936 |
| C | 23.5106214 | 4.7704013 | 47.2592421 |                     |            |           |            |
| C | 24.9802680 | 4.5345888 | 47.6049181 | PC <sub>BINOL</sub> |            |           |            |
| C | 25.9628962 | 5.2210292 | 46.7337746 | C                   | 31.7964786 | 5.5635190 | 45.9988796 |
| C | 25.6510767 | 5.4720562 | 45.2901472 | C                   | 32.4542760 | 6.6197564 | 46.6116701 |
| C | 24.1660359 | 5.7545308 | 45.0241352 | C                   | 30.7441788 | 4.8481312 | 46.6752513 |
| C | 23.2694255 | 4.7389899 | 45.7454669 | C                   | 29.9462643 | 3.7898284 | 46.1222628 |
| O | 25.5077505 | 3.3367365 | 47.1002310 | C                   | 28.9605831 | 3.1649630 | 46.8481947 |
| C | 27.3306028 | 7.7914496 | 46.8241538 | C                   | 31.1554031 | 4.0257844 | 53.3704045 |

|   |            |           |            |   |            |            |            |
|---|------------|-----------|------------|---|------------|------------|------------|
| C | 32.0782522 | 3.1126353 | 52.8917628 | C | 25.4824273 | 5.3429846  | 45.2650110 |
| C | 32.0836669 | 2.7861118 | 51.5177229 | C | 24.0291357 | 5.8312763  | 45.3128076 |
| C | 31.1701761 | 3.3639054 | 50.6623322 | C | 23.1954239 | 4.9672680  | 46.2691708 |
| C | 30.1908031 | 4.2851889 | 51.1325029 | O | 25.2650030 | 3.0844203  | 47.3020285 |
| C | 30.1715497 | 4.6294369 | 52.5274154 | C | 27.4349760 | 7.4390635  | 46.7356438 |
| C | 29.1415319 | 5.5221623 | 52.9700713 | C | 27.4806038 | 8.7556917  | 47.2382431 |
| C | 28.2085525 | 6.0285390 | 52.1028862 | C | 28.4524092 | 9.6539388  | 46.7990147 |
| C | 28.2473801 | 5.7224562 | 50.7102578 | C | 29.4039463 | 9.2642362  | 45.8482915 |
| C | 29.2339952 | 4.8663356 | 50.2247557 | C | 29.3625148 | 7.9607670  | 45.3466845 |
| O | 27.3014698 | 6.3218446 | 49.9656225 | C | 28.3891778 | 7.0532659  | 45.7770720 |
| C | 32.1172233 | 7.0079404 | 47.9267711 | N | 26.4964621 | 6.5419978  | 47.2801442 |
| C | 31.1278559 | 6.3430869 | 48.6127242 | H | 26.0879225 | 5.9794669  | 44.5988537 |
| C | 30.4234317 | 5.2607205 | 48.0184926 | H | 25.6992978 | 4.5900085  | 48.6624826 |
| C | 28.6987315 | 3.5456272 | 48.1853903 | H | 27.0824264 | 4.7007786  | 46.5520983 |
| C | 29.4010223 | 4.5845412 | 48.7696737 | H | 23.5979022 | 5.8115877  | 44.2955256 |
| O | 27.7305667 | 2.8488927 | 48.8475028 | H | 23.9983599 | 6.8875878  | 45.6495905 |
| H | 33.2394712 | 7.1796985 | 46.0926554 | H | 22.1511562 | 5.3268393  | 46.3138035 |
| H | 30.0714362 | 3.4478054 | 45.0946043 | H | 23.1646125 | 3.9292313  | 45.8947349 |
| H | 28.3610520 | 2.3659885 | 46.4052861 | H | 23.2411865 | 4.3032314  | 48.3548198 |
| H | 32.8117555 | 2.6400123 | 53.5534253 | H | 23.7838165 | 5.9755012  | 48.1034528 |
| H | 32.8159132 | 2.0691571 | 51.1333670 | H | 25.5019831 | 4.3235927  | 44.8388335 |
| H | 31.1857292 | 3.1019417 | 49.6027822 | H | 26.7545064 | 9.0628012  | 47.9992078 |
| H | 29.0792544 | 5.8166628 | 54.0219129 | H | 28.4680576 | 10.6689089 | 47.2100482 |
| H | 27.4189157 | 6.6995777 | 52.4500671 | H | 30.1716328 | 9.9647925  | 45.5065602 |
| H | 32.6395412 | 7.8490956 | 48.3916753 | H | 30.1083505 | 7.6382588  | 44.6137452 |
| H | 30.8607236 | 6.6507851 | 49.6256253 | H | 28.3869305 | 6.0394401  | 45.3751564 |
| H | 26.0510444 | 2.6875392 | 47.7209880 | H | 25.6952739 | 7.0243808  | 47.6821300 |
| H | 27.6775828 | 3.1702253 | 49.7707131 | H | 27.3435349 | 6.1653507  | 48.9860910 |
| C | 23.8150572 | 4.9542275 | 47.6724523 | H | 32.0618105 | 5.3619717  | 44.9610722 |
| C | 25.2660237 | 4.4570903 | 47.6527501 | H | 31.1882454 | 4.2451400  | 54.4375835 |
| C | 26.1440325 | 5.2607104 | 46.6558702 |   |            |            |            |
